# Supplementary material for: Identification of lncRNAs and Genes Responsible for Fatness and Fatty Acid Composition Traits between the Tibetan and Yorkshire Pigs
Source: Hindawi journal article supplement (doi:10.1155/2019/5070975), 2019-06-02
Supplement: f1 [file 5070975.f1.pdf]

TM252

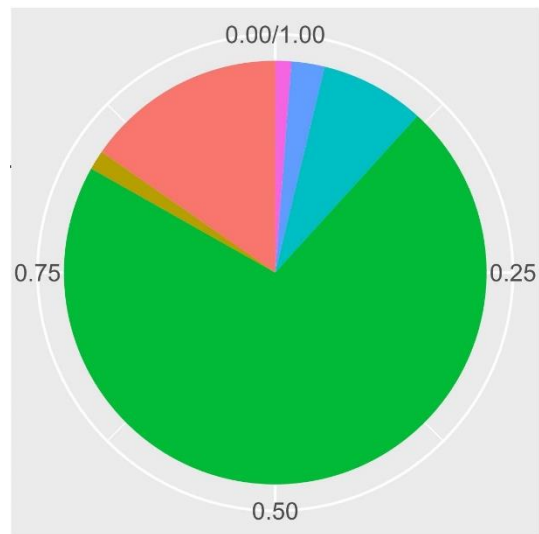

Tag\_count

TA253

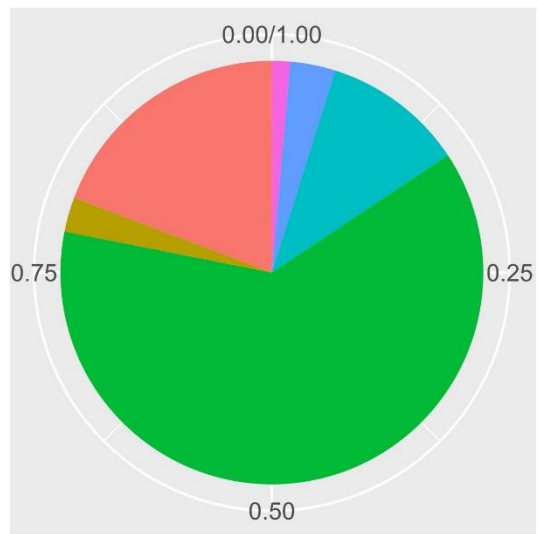

Tag\_count

TM254

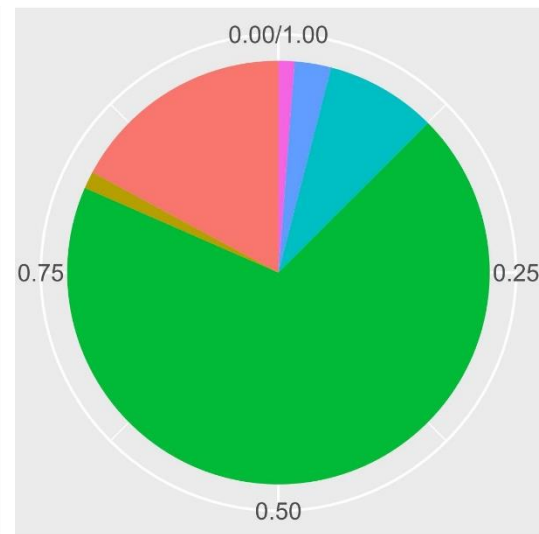

Tag\_count

Group

- 3'UTR\_Exons
- 5'UTR\_Exons
- CDS\_Exons
- Introns
- TES\_down\_10kb
- TSS\_up\_10kb

YM281

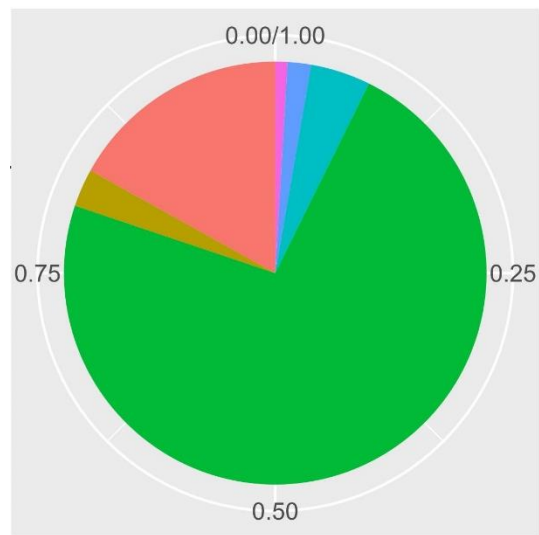

Tag\_count

YM321

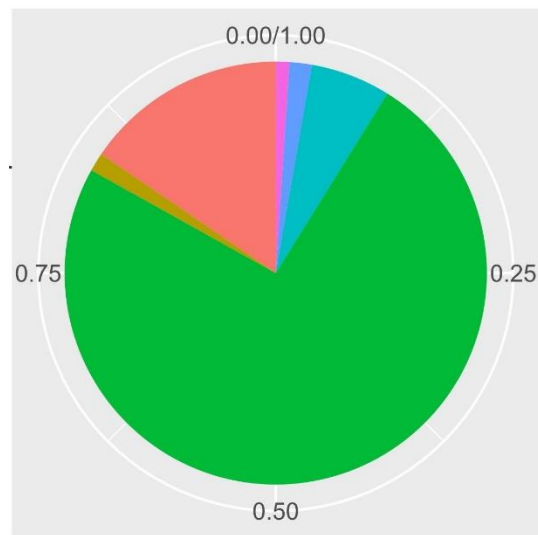

Tag\_count

YM357

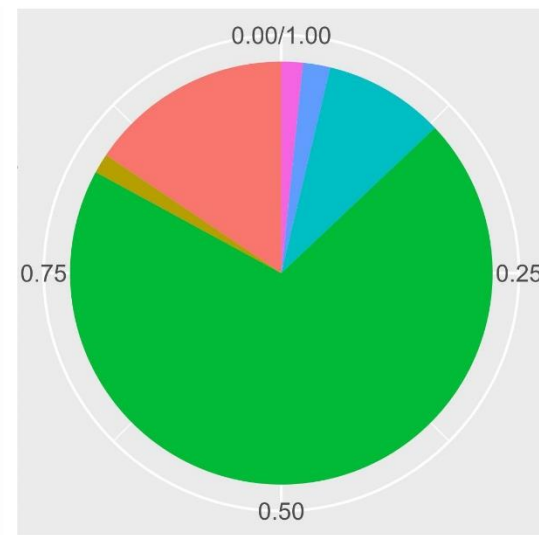

Tag\_count

Group

- 3'UTR\_Exons
- 5'UTR\_Exons
- CDS\_Exons
- Introns
- TES\_down\_10kb
- TSS\_up\_10kb

Figure S1. Summary of RNA-Seq reads alignment.

Table S1. The list of differentially expressed genes between Tibetan and Yorkshire group.

| Row.names          | baseMean    | log2FoldChange | pvalue   | padj     | TA249    | TA251    | TA253    | YA273    | YA302    | YA338    |
|--------------------|-------------|----------------|----------|----------|----------|----------|----------|----------|----------|----------|
| ENSSSCG00000035520 | 46420.29753 | 8.769719643    | 9.5E-245 | 1.4E-240 | 80830.84 | 86331.23 | 110722.5 | 176.3528 | 280.1581 | 180.7016 |
| ENSSSCG00000018080 | 121773.56   | -4.942325703   | 1.93E-76 | 1.45E-72 | 5119.065 | 9847.107 | 8049.157 | 259577.4 | 227106.4 | 220942.3 |
| ENSSSCG00000038663 | 454.1424881 | -5.554417844   | 9.97E-47 | 4.97E-43 | 6.731816 | 27.20195 | 22.92639 | 1075.055 | 808.6383 | 784.3019 |
| ENSSSCG00000022945 | 662.5435487 | 4.229568887    | 6.26E-36 | 2.34E-32 | 1460.804 | 1416.445 | 897.1197 | 42.84277 | 61.54989 | 96.50035 |
| ENSSSCG00000032343 | 151.905191  | 5.913989823    | 8.23E-28 | 2.46E-24 | 356.7862 | 202.0717 | 337.9151 | 6.974404 | 1.061205 | 6.622573 |
| ENSSSCG00000036724 | 1373.218408 | 3.005722462    | 7.75E-25 | 1.93E-21 | 2581.171 | 2001.287 | 2744.189 | 213.2175 | 421.2984 | 278.1481 |
| ENSSSCG00000017427 | 202.9954304 | -4.578751222   | 5E-24    | 1.07E-20 | 20.19545 | 5.82899  | 22.92639 | 313.8482 | 548.643  | 306.5305 |
| ENSSSCG00000018065 | 137039.0127 | -2.614687632   | 1.31E-23 | 2.45E-20 | 39800.42 | 30269.95 | 45332.45 | 216037.2 | 302102.8 | 188691.3 |
| ENSSSCG00000008348 | 520.4040016 | 3.097500677    | 3.77E-23 | 6.27E-20 | 1232.884 | 701.4218 | 861.2349 | 124.5429 | 120.9774 | 81.36304 |
| ENSSSCG00000015810 | 842.3044576 | 3.016460347    | 2E-22    | 3E-19    | 1876.253 | 915.1514 | 1706.521 | 156.4259 | 202.6902 | 196.785  |
| ENSSSCG00000034866 | 259.5243643 | 4.029614138    | 1.52E-21 | 2.07E-18 | 729.9212 | 287.5635 | 449.5566 | 34.87202 | 38.20338 | 17.02947 |
| ENSSSCG00000035428 | 87.56714085 | -5.878887223   | 2.44E-20 | 3.05E-17 | 4.80844  | 1.942997 | 1.993599 | 164.3967 | 212.241  | 140.0201 |
| ENSSSCG00000025795 | 294.4686444 | 3.417740545    | 3.7E-20  | 4.26E-17 | 792.4309 | 383.7418 | 439.5886 | 63.76598 | 37.14218 | 50.14234 |
| ENSSSCG00000006043 | 158.9556707 | 4.345885499    | 2.85E-19 | 3.04E-16 | 470.2654 | 295.3355 | 143.5391 | 14.94515 | 11.67326 | 17.97556 |
| ENSSSCG00000000419 | 1229.616647 | 2.655037762    | 4.81E-18 | 4.8E-15  | 3061.053 | 1394.1   | 1911.862 | 350.7129 | 292.8926 | 367.0798 |
| ENSSSCG00000024045 | 2335.574418 | 2.40296114     | 3.37E-17 | 3.15E-14 | 5096.946 | 2568.642 | 4119.773 | 795.0821 | 625.0498 | 807.9539 |
| ENSSSCG00000011322 | 469.7290452 | 3.211437713    | 7.5E-17  | 6.6E-14  | 1255.964 | 642.1604 | 645.9262 | 121.5539 | 47.75423 | 105.0151 |
| ENSSSCG00000012572 | 1268.660934 | -3.236800615   | 8.32E-17 | 6.92E-14 | 351.9778 | 265.219  | 112.6384 | 2083.354 | 3316.266 | 1482.51  |
| ENSSSCG00000039651 | 1444.957911 | 2.150193515    | 1.7E-16  | 1.34E-13 | 2391.718 | 1787.557 | 2896.7   | 555.9597 | 453.1346 | 584.6786 |
| ENSSSCG00000026478 | 609.4242672 | 3.382413998    | 4.07E-16 | 3.04E-13 | 1585.823 | 1194.943 | 556.2142 | 97.64166 | 57.30507 | 164.6183 |
| ENSSSCG00000005949 | 176.4899035 | 3.136295382    | 6.86E-16 | 4.89E-13 | 296.1999 | 233.1596 | 421.6462 | 26.90127 | 31.83615 | 49.19626 |
| ENSSSCG00000037645 | 991.987344  | 2.341025362    | 2.23E-15 | 1.52E-12 | 1994.541 | 1441.704 | 1535.071 | 310.8592 | 226.0367 | 443.7124 |
| ENSSSCG00000021176 | 148.8264304 | 2.956226683    | 7.24E-15 | 4.71E-12 | 261.5791 | 289.5065 | 240.2287 | 39.85374 | 20.1629  | 41.6276  |
| ENSSSCG00000004588 | 182.7971564 | 2.930137804    | 9.03E-15 | 5.63E-12 | 369.2882 | 233.1596 | 366.8223 | 36.86471 | 59.42748 | 31.2207  |
| ENSSSCG0000002452  | 13092.5564  | 2.024029771    | 2.02E-14 | 1.21E-11 | 26146.37 | 15470.14 | 21436.18 | 4122.869 | 5296.475 | 6083.307 |
| ENSSSCG00000000132 | 71.98788083 | 9.612156333    | 2.52E-14 | 1.45E-11 | 156.7551 | 112.6938 | 162.4783 | 0        | 0        | 0        |
| ENSSSCG00000035756 | 99.0442109  | -4.942125746   | 2.92E-14 | 1.59E-11 | 1.923376 | 0.971498 | 15.94879 | 169.3784 | 141.1403 | 264.9029 |
| ENSSSCG00000039798 | 501.3743265 | 3.164175535    | 2.98E-14 | 1.59E-11 | 1389.639 | 486.7207 | 830.3341 | 110.5941 | 50.93784 | 140.0201 |
| ENSSSCG00000039222 | 370.4535373 | 3.101944524    | 3.51E-14 | 1.81E-11 | 1003.041 | 560.5545 | 427.627  | 71.73673 | 42.4482  | 117.3142 |
| ENSSSCG00000029744 | 133.1811701 | -3.369893949   | 7.29E-14 | 3.64E-11 | 26.92726 | 9.714984 | 33.89119 | 183.3272 | 264.2401 | 280.9863 |
| ENSSSCG00000027941 | 93.88050364 | -4.283500192   | 9.6E-14  | 4.63E-11 | 5.770128 | 3.885993 | 17.94239 | 260.0456 | 168.7316 | 106.9073 |
| ENSSSCG00000000893 | 81.84932279 | -3.574382408   | 1.14E-13 | 5.32E-11 | 10.57857 | 17.48697 | 9.967996 | 147.4588 | 113.5489 | 192.0546 |
| ENSSSCG00000003914 | 4564.413805 | 2.45184368     | 1.17E-13 | 5.32E-11 | 9079.296 | 3861.706 | 10213.21 | 1296.243 | 1686.255 | 1249.774 |

|                    |             |              |          |          |          |          |          |          |          |          |
|--------------------|-------------|--------------|----------|----------|----------|----------|----------|----------|----------|----------|
| ENSSSCG0000006247  | 71.81049541 | -4.255005184 | 1.29E-13 | 5.52E-11 | 12.50194 | 1.942997 | 6.977597 | 161.4076 | 106.1205 | 141.9123 |
| ENSSSCG00000015353 | 821.9110089 | 3.040380704  | 1.27E-13 | 5.52E-11 | 2272.469 | 1388.271 | 736.6349 | 177.3491 | 96.56966 | 260.1725 |
| ENSSSCG00000006774 | 357.8207273 | 2.289624011  | 1.41E-13 | 5.84E-11 | 748.1932 | 490.6067 | 543.2558 | 110.5941 | 154.9359 | 99.3386  |
| ENSSSCG00000013339 | 573.0239277 | -2.707204025 | 2.99E-13 | 1.21E-10 | 121.1727 | 174.8697 | 160.4847 | 534.0401 | 1579.073 | 868.5032 |
| ENSSSCG00000012459 | 415.28      | -2.258034859 | 3.29E-13 | 1.29E-10 | 97.13048 | 199.1572 | 134.5679 | 650.6123 | 694.0281 | 716.184  |
| ENSSSCG00000000133 | 2552.575002 | 1.702760405  | 4.99E-13 | 1.92E-10 | 3976.58  | 3282.693 | 4456.691 | 1200.594 | 1365.771 | 1033.121 |
| ENSSSCG00000024752 | 1402.233684 | 2.293808946  | 5.66E-13 | 2.07E-10 | 2412.875 | 1846.818 | 2728.241 | 284.9542 | 675.9876 | 464.5262 |
| ENSSSCG00000038569 | 253.4488025 | -2.216534574 | 5.56E-13 | 2.07E-10 | 80.78179 | 112.6938 | 75.75677 | 475.2558 | 378.8502 | 397.3544 |
| ENSSSCG00000038824 | 1302.466514 | 2.977764565  | 6.03E-13 | 2.15E-10 | 3398.605 | 1387.3   | 2148.103 | 233.1444 | 501.95   | 145.6966 |
| ENSSSCG00000036352 | 280.7147691 | 2.248762022  | 6.63E-13 | 2.31E-10 | 565.4725 | 467.2907 | 358.8479 | 114.5795 | 80.65159 | 97.44644 |
| ENSSSCG00000010772 | 215.8441926 | 4.048289113  | 1.5E-12  | 5.11E-10 | 671.2582 | 186.5277 | 363.8319 | 16.93784 | 6.36723  | 50.14234 |
| ENSSSCG00000003558 | 460.7593991 | 2.00499046   | 1.6E-12  | 5.33E-10 | 897.2549 | 754.8542 | 561.1982 | 195.2833 | 159.1808 | 196.785  |
| ENSSSCG00000006357 | 1160.672344 | 1.832465197  | 1.94E-12 | 6.16E-10 | 2372.484 | 1584.514 | 1480.247 | 521.0876 | 514.6845 | 491.0165 |
| ENSSSCG00000032857 | 456.646398  | 2.593981718  | 1.9E-12  | 6.16E-10 | 976.1133 | 419.6873 | 954.934  | 168.382  | 90.20243 | 130.5593 |
| ENSSSCG00000022236 | 4863.312093 | 1.831965783  | 2.15E-12 | 6.71E-10 | 10245.82 | 6368.172 | 6167.199 | 2274.652 | 1901.68  | 2222.346 |
| ENSSSCG00000039556 | 299.6901004 | 3.307893487  | 2.56E-12 | 7.81E-10 | 345.246  | 467.2907 | 820.3661 | 70.74039 | 77.46797 | 17.02947 |
| ENSSSCG00000014432 | 832.5386877 | -1.827479893 | 2.75E-12 | 8.24E-10 | 390.4453 | 270.0765 | 437.595  | 1217.532 | 1345.608 | 1333.975 |
| ENSSSCG00000017421 | 7723.306868 | 1.867485881  | 4.43E-12 | 1.3E-09  | 14126.23 | 8252.878 | 13993.07 | 2773.82  | 3338.551 | 3855.284 |
| ENSSSCG00000008294 | 497.6292223 | -2.023657069 | 5.72E-12 | 1.65E-09 | 162.5253 | 179.7272 | 247.2063 | 1010.292 | 715.2522 | 670.7721 |
| ENSSSCG00000002825 | 6840.208308 | 2.254740593  | 6.44E-12 | 1.82E-09 | 13330.92 | 12665.42 | 7935.522 | 2908.327 | 1286.181 | 2914.878 |
| ENSSSCG00000033909 | 1245.175304 | 1.790553478  | 6.71E-12 | 1.86E-09 | 2381.139 | 1883.735 | 1531.084 | 590.8317 | 462.6854 | 621.5758 |
| ENSSSCG00000007748 | 616.037228  | 2.412864844  | 7.1E-12  | 1.9E-09  | 1613.712 | 650.9039 | 847.2797 | 150.4479 | 205.8738 | 228.0057 |
| ENSSSCG00000039985 | 3973.305334 | 2.648911067  | 7.04E-12 | 1.9E-09  | 10209.28 | 5402.502 | 4950.107 | 1408.83  | 476.4811 | 1392.633 |
| ENSSSCG00000003797 | 65.1064764  | -4.406863655 | 7.28E-12 | 1.91E-09 | 2.885064 | 9.714984 | 4.983998 | 191.2979 | 123.0998 | 58.65708 |
| ENSSSCG00000039270 | 179.8959933 | 4.03039774   | 8.48E-12 | 2.19E-09 | 609.7102 | 227.3306 | 180.4207 | 17.93418 | 4.24482  | 39.73544 |
| ENSSSCG00000002375 | 368.2343408 | 2.86077176   | 9.83E-12 | 2.45E-09 | 412.5641 | 439.1173 | 1090.499 | 53.80255 | 92.32484 | 121.0985 |
| ENSSSCG00000013056 | 2470.99349  | -2.360631941 | 9.72E-12 | 2.45E-09 | 1251.156 | 432.3168 | 732.6477 | 3931.571 | 5175.497 | 3302.772 |
| ENSSSCG00000018069 | 303196.6446 | -1.549013968 | 1.18E-11 | 2.89E-09 | 153923.9 | 136499.4 | 172923.8 | 402663.2 | 543984.3 | 409185.2 |
| ENSSSCG00000031023 | 129.7927773 | -3.20620632  | 1.25E-11 | 3.02E-09 | 13.46363 | 42.74593 | 19.93599 | 167.3857 | 206.935  | 328.2904 |
| ENSSSCG00000005278 | 263.3036247 | 2.645614503  | 1.3E-11  | 3.09E-09 | 303.8934 | 428.4308 | 629.9774 | 106.6088 | 45.63182 | 65.27965 |
| ENSSSCG00000011241 | 650.508581  | -2.238313432 | 1.62E-11 | 3.8E-09  | 270.2343 | 127.2663 | 285.0847 | 1347.056 | 943.4113 | 929.9985 |
| ENSSSCG00000012118 | 501.6652066 | 2.504412179  | 1.65E-11 | 3.8E-09  | 1381.946 | 649.9324 | 527.307  | 154.4332 | 115.6714 | 180.7016 |
| ENSSSCG00000017694 | 10414.03484 | 1.627397494  | 1.74E-11 | 3.95E-09 | 16316    | 13719.5  | 17169.87 | 3918.619 | 5273.128 | 6087.091 |
| ENSSSCG00000012229 | 285.4310285 | 2.481150109  | 1.96E-11 | 4.38E-09 | 574.1277 | 558.6116 | 319.9727 | 109.5978 | 50.93784 | 99.3386  |
| ENSSSCG00000018061 | 43894.79807 | -1.982464399 | 2.12E-11 | 4.66E-09 | 14200.28 | 25655.33 | 13332.19 | 86535.42 | 56330.89 | 67314.67 |

|                     |             |              |          |          |          |          |          |          |          |          |
|---------------------|-------------|--------------|----------|----------|----------|----------|----------|----------|----------|----------|
| ENSSSCG00000025133  | 994.1960119 | 2.125805949  | 2.91E-11 | 6.32E-09 | 2281.124 | 1275.577 | 1296.836 | 387.5776 | 255.7504 | 468.3105 |
| ENSSSCG00000039926  | 661.0263125 | 2.561894696  | 3.59E-11 | 7.68E-09 | 1886.832 | 740.2817 | 764.5453 | 261.042  | 177.2212 | 136.2358 |
| ENSSSCG00000033590  | 122.5412195 | 2.342004197  | 3.74E-11 | 7.89E-09 | 196.1843 | 221.5016 | 196.3695 | 41.84643 | 42.4482  | 36.89719 |
| ENSSSCG00000025644  | 353.9653346 | 3.139452703  | 3.98E-11 | 8.28E-09 | 766.4653 | 811.2011 | 329.9407 | 111.5905 | 22.28531 | 82.30913 |
| ENSSSCG00000040981  | 537.30696   | 2.038285106  | 5.09E-11 | 1.04E-08 | 1143.447 | 807.3151 | 641.939  | 270.0091 | 171.9152 | 189.2164 |
| ENSSSCG00000009228  | 140.2266285 | -2.572185377 | 5.92E-11 | 1.2E-08  | 49.04609 | 27.20195 | 44.85598 | 311.8555 | 223.9143 | 184.486  |
| ENSSSCG00000017548  | 936.3906749 | -2.650607191 | 9.45E-11 | 1.89E-08 | 244.2687 | 340.0244 | 187.3983 | 1066.088 | 2913.008 | 867.5571 |
| ENSSSCG00000000648  | 90.04702912 | 2.91308926   | 1.17E-10 | 2.3E-08  | 185.6058 | 172.9267 | 118.6192 | 16.93784 | 15.91808 | 30.27462 |
| ENSSSCG00000001455  | 1397.801629 | 2.756883975  | 1.3E-10  | 2.52E-08 | 3372.64  | 998.7003 | 2934.578 | 167.3857 | 458.4406 | 455.0654 |
| ENSSSCG00000009668  | 1885.848882 | 1.951394944  | 1.53E-10 | 2.94E-08 | 3146.643 | 3573.171 | 2270.71  | 480.2376 | 858.5149 | 985.8173 |
| ENSSSCG00000009412  | 2651.602804 | 2.170858629  | 1.71E-10 | 3.25E-08 | 6006.703 | 4724.396 | 2287.655 | 937.5592 | 720.5582 | 1232.745 |
| ENSSSCG00000033457  | 128.8823028 | 2.47079065   | 1.93E-10 | 3.62E-08 | 170.2188 | 282.706  | 202.3503 | 43.83911 | 29.71374 | 44.46585 |
| ENSSSCG00000011673  | 94.06235372 | 2.922304605  | 2.07E-10 | 3.83E-08 | 141.3681 | 186.5277 | 170.4527 | 25.90493 | 29.71374 | 10.4069  |
| ENSSSCG00000001487  | 778.2611772 | 1.987867751  | 2.11E-10 | 3.85E-08 | 957.8412 | 1481.535 | 1289.859 | 195.2833 | 396.8907 | 348.1581 |
| ENSSSCG000000008854 | 814.6718353 | -1.682227633 | 2.16E-10 | 3.85E-08 | 343.3226 | 358.4829 | 459.5246 | 1530.384 | 1164.142 | 1032.175 |
| ENSSSCG00000033465  | 131.047676  | 2.828320613  | 2.14E-10 | 3.85E-08 | 344.2843 | 160.2972 | 184.4079 | 27.89762 | 46.69302 | 22.70597 |
| ENSSSCG00000029805  | 1710.655239 | -1.636284628 | 2.21E-10 | 3.89E-08 | 768.3887 | 1062.819 | 666.8589 | 2993.016 | 2405.752 | 2367.097 |
| ENSSSCG00000031648  | 75.07700452 | 3.428962311  | 2.34E-10 | 4.06E-08 | 109.6324 | 160.2972 | 142.5423 | 7.970748 | 6.36723  | 23.65205 |
| ENSSSCG00000034220  | 83.83460918 | 3.933929474  | 2.9E-10  | 4.99E-08 | 283.698  | 112.6938 | 75.75677 | 18.93053 | 5.306025 | 6.622573 |
| ENSSSCG00000038877  | 41.04714417 | -6.380723399 | 2.97E-10 | 5.05E-08 | 1.923376 | 0.971498 | 0        | 73.72942 | 55.18266 | 114.4759 |
| ENSSSCG00000001453  | 10331.50096 | 1.580410934  | 3.06E-10 | 5.14E-08 | 17205.56 | 11422.88 | 17826.76 | 4450.666 | 5152.151 | 5930.987 |
| ENSSSCG00000023630  | 744.1633908 | 2.026679838  | 3.39E-10 | 5.63E-08 | 1686.801 | 1208.544 | 689.7853 | 299.8994 | 279.0969 | 300.854  |
| ENSSSCG00000014361  | 778.1747247 | 2.072173246  | 3.47E-10 | 5.71E-08 | 1471.383 | 731.5383 | 1568.963 | 229.159  | 375.6666 | 292.3393 |
| ENSSSCG00000030209  | 4625.725636 | 2.342691463  | 4.89E-10 | 7.96E-08 | 8965.817 | 3120.453 | 11097.37 | 1356.023 | 1952.617 | 1262.073 |
| ENSSSCG00000026169  | 626.4569565 | 1.557743283  | 5.07E-10 | 8.16E-08 | 1072.282 | 798.5716 | 934.998  | 329.7897 | 284.403  | 338.6973 |
| ENSSSCG00000005467  | 1989.371182 | -1.610442086 | 5.67E-10 | 8.9E-08  | 738.5764 | 1293.064 | 913.0684 | 2857.513 | 3092.352 | 3041.653 |
| ENSSSCG00000006140  | 105.0788525 | 3.309191448  | 5.68E-10 | 8.9E-08  | 205.8012 | 109.7793 | 257.1743 | 35.86836 | 9.550846 | 12.29906 |
| ENSSSCG00000006381  | 250.47641   | 2.071558816  | 5.77E-10 | 8.9E-08  | 403.9089 | 500.3217 | 310.0047 | 115.5758 | 68.97833 | 104.069  |
| ENSSSCG00000035218  | 266.6899748 | 2.282907221  | 5.74E-10 | 8.9E-08  | 377.9434 | 502.2646 | 447.563  | 62.76964 | 65.79471 | 143.8044 |
| ENSSSCG00000003784  | 81.27222109 | -2.899148742 | 6.24E-10 | 9.54E-08 | 12.50194 | 27.20195 | 17.94239 | 105.6124 | 164.4868 | 159.8878 |
| ENSSSCG00000009578  | 219.4761117 | -2.049456044 | 6.55E-10 | 9.91E-08 | 90.39867 | 59.2614  | 106.6576 | 359.68   | 303.5047 | 397.3544 |
| ENSSSCG00000008239  | 926.6646484 | 2.022548463  | 7.42E-10 | 1.11E-07 | 2221.499 | 1159.969 | 1080.531 | 441.3802 | 270.6073 | 386.0014 |
| ENSSSCG00000012571  | 85.11185593 | -2.645047415 | 8.16E-10 | 1.21E-07 | 25.96558 | 15.54397 | 28.90719 | 132.5137 | 150.6911 | 157.0496 |
| ENSSSCG00000013556  | 134.271167  | 2.771122643  | 8.35E-10 | 1.22E-07 | 301.0083 | 262.3046 | 139.5519 | 47.82449 | 18.04049 | 36.89719 |
| ENSSSCG00000037324  | 541.0689002 | 2.061928432  | 9.78E-10 | 1.42E-07 | 920.3354 | 536.2671 | 1162.268 | 181.3345 | 275.9133 | 170.2947 |

|                    |             |              |          |          |          |          |          |          |          |          |
|--------------------|-------------|--------------|----------|----------|----------|----------|----------|----------|----------|----------|
| ENSSSCG00000015246 | 50.30530524 | 3.99736839   | 9.87E-10 | 1.42E-07 | 128.8662 | 83.54886 | 71.76957 | 9.963435 | 1.061205 | 6.622573 |
| ENSSSCG00000039103 | 183202.6447 | -1.236758801 | 1.17E-09 | 1.66E-07 | 114717.8 | 105371.6 | 107381.2 | 230197.2 | 272734   | 268814   |
| ENSSSCG00000007754 | 1335.895484 | 1.822385077  | 1.18E-09 | 1.67E-07 | 2515.776 | 1904.137 | 1829.127 | 591.828  | 378.8502 | 795.6549 |
| ENSSSCG00000009646 | 201.6176686 | -6.462771822 | 1.21E-09 | 1.7E-07  | 9.61688  | 2.914495 | 0.9968   | 813.0163 | 200.5678 | 182.5938 |
| ENSSSCG00000014441 | 2654.555018 | 1.726946818  | 1.23E-09 | 1.71E-07 | 5196.962 | 3636.318 | 3399.087 | 1561.27  | 865.9433 | 1267.75  |
| ENSSSCG00000006379 | 445.9212164 | 2.155063966  | 1.28E-09 | 1.76E-07 | 951.1094 | 803.4291 | 430.6174 | 202.2577 | 109.3041 | 178.8095 |
| ENSSSCG00000001535 | 66.77383359 | 4.021418754  | 1.48E-09 | 2.01E-07 | 144.2532 | 85.49185 | 147.5263 | 0        | 14.85687 | 8.514737 |
| ENSSSCG00000006243 | 197.09464   | -2.22948432  | 1.72E-09 | 2.32E-07 | 39.42921 | 73.83387 | 94.69596 | 277.9798 | 334.2796 | 362.3494 |
| ENSSSCG00000002001 | 281.7922158 | 2.15485588   | 1.76E-09 | 2.35E-07 | 570.281  | 274.934  | 535.2814 | 88.67457 | 132.6506 | 88.9317  |
| ENSSSCG00000013553 | 322.6207115 | 1.750899119  | 1.88E-09 | 2.49E-07 | 599.1316 | 495.4642 | 397.723  | 168.382  | 136.8955 | 138.128  |
| ENSSSCG00000037425 | 75.82730535 | 3.922076684  | 1.9E-09  | 2.5E-07  | 282.7363 | 59.2614  | 84.72797 | 4.981717 | 13.79567 | 9.460819 |
| ENSSSCG00000008937 | 148.5625518 | 3.677413339  | 2.22E-09 | 2.89E-07 | 509.6946 | 179.7272 | 137.5583 | 31.88299 | 3.183615 | 29.32854 |
| ENSSSCG00000005055 | 3578.416474 | 1.739425645  | 2.59E-09 | 3.35E-07 | 7208.813 | 5376.272 | 3937.358 | 2083.354 | 1211.896 | 1652.805 |
| ENSSSCG00000005023 | 207.2839289 | 2.166031491  | 2.9E-09  | 3.71E-07 | 227.92   | 441.0603 | 347.8831 | 80.70382 | 91.26364 | 54.87275 |
| ENSSSCG00000009789 | 3365.551382 | -1.363075781 | 3.27E-09 | 4.15E-07 | 2038.778 | 1822.531 | 1791.249 | 4042.165 | 5789.935 | 4708.65  |
| ENSSSCG00000025271 | 229.965954  | 2.640680403  | 5.26E-09 | 6.62E-07 | 716.4575 | 188.4707 | 284.0879 | 58.78426 | 74.28436 | 57.711   |
| ENSSSCG00000015559 | 718.2592933 | 1.952586862  | 5.36E-09 | 6.69E-07 | 1224.229 | 1185.228 | 1015.739 | 198.2724 | 219.6695 | 466.4184 |
| ENSSSCG00000026140 | 1131.957522 | 1.524678851  | 6.2E-09  | 7.61E-07 | 2001.273 | 1772.984 | 1265.936 | 531.0511 | 541.2146 | 679.2868 |
| ENSSSCG00000027196 | 392.3966356 | 1.614442612  | 6.15E-09 | 7.61E-07 | 631.829  | 664.5049 | 478.4638 | 223.1809 | 171.9152 | 184.486  |
| ENSSSCG00000016832 | 58.26341457 | 2.878168109  | 6.41E-09 | 7.8E-07  | 83.66685 | 121.4373 | 102.6704 | 15.9415  | 11.67326 | 14.19123 |
| ENSSSCG00000013237 | 945.9656485 | 1.745068651  | 6.7E-09  | 8.08E-07 | 2089.748 | 987.0423 | 1294.843 | 405.5118 | 443.5837 | 455.0654 |
| ENSSSCG00000003231 | 418.3636517 | 2.432837879  | 7.28E-09 | 8.71E-07 | 1246.348 | 325.4519 | 546.2462 | 139.4881 | 105.0593 | 147.5888 |
| ENSSSCG00000000892 | 36.31718198 | -6.785151295 | 8.3E-09  | 9.87E-07 | 0        | 0        | 1.993599 | 63.76598 | 59.42748 | 92.71603 |
| ENSSSCG00000029281 | 558.6530184 | 2.70273793   | 8.53E-09 | 1.01E-06 | 444.2998 | 1874.02  | 587.115  | 189.3053 | 172.9764 | 84.20129 |
| ENSSSCG00000000194 | 2080.544034 | 2.165512578  | 1.03E-08 | 1.2E-06  | 5153.686 | 1366.898 | 3687.162 | 724.3417 | 894.5959 | 656.5808 |
| ENSSSCG00000006932 | 59.24383467 | -3.190816183 | 1.08E-08 | 1.25E-06 | 8.655192 | 18.45847 | 7.974397 | 93.65629 | 75.34556 | 151.3731 |
| ENSSSCG00000002764 | 89.0345639  | 3.468454245  | 1.12E-08 | 1.29E-06 | 164.4486 | 211.7866 | 113.6352 | 30.88665 | 10.61205 | 2.838246 |
| ENSSSCG00000003650 | 131.405531  | -2.133750013 | 1.16E-08 | 1.31E-06 | 61.54803 | 35.94544 | 48.84318 | 213.2175 | 177.2212 | 251.6578 |
| ENSSSCG00000011999 | 159.948451  | 2.789950876  | 1.16E-08 | 1.31E-06 | 352.9395 | 315.737  | 169.4559 | 47.82449 | 60.48869 | 13.24515 |
| ENSSSCG00000003470 | 39.08348064 | 4.987736927  | 1.27E-08 | 1.42E-06 | 43.27596 | 59.2614  | 124.6    | 0.996343 | 6.36723  | 0        |
| ENSSSCG00000005481 | 2149.834348 | -1.632089032 | 1.49E-08 | 1.65E-06 | 841.477  | 820.9161 | 1484.235 | 3403.509 | 2657.258 | 3691.612 |
| ENSSSCG00000020785 | 378.9578889 | -1.693768486 | 1.49E-08 | 1.65E-06 | 140.4064 | 157.3827 | 239.2319 | 656.5903 | 538.031  | 542.1049 |
| ENSSSCG00000006003 | 3018.49983  | -1.488551871 | 1.67E-08 | 1.84E-06 | 1436.762 | 2133.41  | 1188.185 | 4098.957 | 4701.138 | 4552.546 |
| ENSSSCG00000012787 | 720.8247423 | 1.485434615  | 1.83E-08 | 1.98E-06 | 1035.738 | 889.8925 | 1260.952 | 333.7751 | 457.3794 | 347.2121 |
| ENSSSCG00000013273 | 517.2454106 | 2.657438695  | 1.82E-08 | 1.98E-06 | 1542.548 | 307.965  | 828.3405 | 74.72576 | 172.9764 | 176.9173 |

|                    |             |              |          |          |          |          |          |          |          |          |
|--------------------|-------------|--------------|----------|----------|----------|----------|----------|----------|----------|----------|
| ENSSSCG00000029458 | 482.6583717 | -1.418111182 | 1.91E-08 | 2.06E-06 | 260.6174 | 238.9886 | 289.0719 | 648.6196 | 669.6204 | 789.0323 |
| ENSSSCG00000017296 | 2867.858777 | 1.950944862  | 1.94E-08 | 2.08E-06 | 7642.534 | 2792.086 | 3236.608 | 1261.371 | 1021.94  | 1252.612 |
| ENSSSCG00000039815 | 328.8440893 | -1.79523512  | 2.05E-08 | 2.17E-06 | 131.7513 | 173.8982 | 135.5647 | 531.0511 | 652.6411 | 348.1581 |
| ENSSSCG00000006171 | 146.9627305 | -2.262830368 | 2.16E-08 | 2.28E-06 | 62.50972 | 45.66042 | 43.85918 | 360.6763 | 166.6092 | 202.4615 |
| ENSSSCG00000026890 | 105.4481721 | 2.536679498  | 2.31E-08 | 2.41E-06 | 274.0811 | 136.9813 | 128.5872 | 40.85008 | 27.59133 | 24.59813 |
| ENSSSCG00000027183 | 54.4375007  | 3.420422123  | 2.32E-08 | 2.41E-06 | 88.47529 | 77.71987 | 132.5743 | 17.93418 | 4.24482  | 5.676491 |
| ENSSSCG00000003773 | 385.8210828 | -1.735112025 | 2.36E-08 | 2.44E-06 | 175.9889 | 193.3282 | 165.4687 | 797.0748 | 410.6864 | 572.3795 |
| ENSSSCG00000027030 | 105.3663906 | 2.364719804  | 2.49E-08 | 2.55E-06 | 221.1882 | 174.8697 | 133.5711 | 34.87202 | 22.28531 | 45.41193 |
| ENSSSCG00000029771 | 261.0796446 | -1.890241585 | 2.7E-08  | 2.75E-06 | 88.47529 | 152.5252 | 91.70556 | 390.5666 | 516.8069 | 326.3983 |
| ENSSSCG00000008550 | 2849.052011 | -1.233196731 | 2.73E-08 | 2.76E-06 | 1548.318 | 1967.284 | 1585.908 | 4132.833 | 3627.199 | 4232.77  |
| ENSSSCG00000015136 | 397.4137883 | 1.835797524  | 3.33E-08 | 3.34E-06 | 602.0167 | 809.2581 | 451.5502 | 230.1553 | 123.0998 | 168.4026 |
| ENSSSCG00000018092 | 190211.6984 | -1.223782428 | 3.87E-08 | 3.86E-06 | 105253.9 | 110268.9 | 126627.4 | 221033.8 | 303305.1 | 274781   |
| ENSSSCG00000033908 | 31.47608649 | 5.167395145  | 4.42E-08 | 4.38E-06 | 72.1266  | 46.63192 | 64.79197 | 0        | 5.306025 | 0        |
| ENSSSCG00000037241 | 486.1033564 | 1.81566965   | 4.61E-08 | 4.54E-06 | 1125.175 | 586.785  | 559.2046 | 193.2906 | 261.0564 | 191.1085 |
| ENSSSCG00000037449 | 2932.093559 | 1.930607951  | 4.75E-08 | 4.65E-06 | 7258.821 | 2167.413 | 4510.518 | 1138.821 | 1181.121 | 1335.868 |
| ENSSSCG00000039849 | 19.80169608 | 7.749651607  | 4.98E-08 | 4.84E-06 | 27.88895 | 30.11645 | 60.80478 | 0        | 0        | 0        |
| ENSSSCG00000016175 | 299.3659696 | -1.734777611 | 5.07E-08 | 4.89E-06 | 147.1383 | 164.1832 | 103.6672 | 539.0218 | 341.708  | 500.4773 |
| ENSSSCG00000017738 | 182.2232892 | 2.157787736  | 5.31E-08 | 5.1E-06  | 385.6369 | 195.2712 | 311.9983 | 72.73307 | 87.01882 | 40.68152 |
| ENSSSCG00000001633 | 19.34843229 | 7.716740121  | 5.4E-08  | 5.15E-06 | 51.93115 | 24.28746 | 39.87198 | 0        | 0        | 0        |
| ENSSSCG00000017673 | 448.2148746 | -1.51021583  | 5.49E-08 | 5.2E-06  | 193.2993 | 302.136  | 203.3471 | 662.5684 | 642.0291 | 685.9094 |
| ENSSSCG00000009492 | 1616.377967 | -1.200752901 | 5.7E-08  | 5.37E-06 | 850.1322 | 1003.558 | 1086.512 | 2346.389 | 2207.307 | 2204.371 |
| ENSSSCG00000006588 | 95.21748081 | 3.53507655   | 6.39E-08 | 5.98E-06 | 318.3187 | 31.08795 | 176.4335 | 13.94881 | 20.1629  | 11.35298 |
| ENSSSCG00000035836 | 297.2260811 | 2.417399991  | 8.38E-08 | 7.79E-06 | 563.5492 | 172.9267 | 765.5421 | 86.68188 | 119.9162 | 74.74047 |
| ENSSSCG00000028592 | 2076.061221 | 1.224097609  | 8.43E-08 | 7.79E-06 | 3128.371 | 2491.893 | 3102.04  | 1214.543 | 1405.036 | 1114.484 |
| ENSSSCG00000021041 | 715.5656586 | 1.504905138  | 8.68E-08 | 7.97E-06 | 874.1744 | 968.5839 | 1331.724 | 344.7348 | 464.8078 | 309.3688 |
| ENSSSCG00000032241 | 3832.035682 | 1.971163173  | 9E-08    | 8.22E-06 | 8313.792 | 6793.688 | 3212.685 | 1407.833 | 961.4518 | 2302.763 |
| ENSSSCG00000040885 | 221.7559815 | 1.820427105  | 9.14E-08 | 8.29E-06 | 292.3531 | 433.2883 | 311.0015 | 87.67823 | 130.5282 | 75.68655 |
| ENSSSCG00000000261 | 1075.907625 | 1.65019579   | 9.4E-08  | 8.48E-06 | 2112.828 | 1573.827 | 1209.118 | 715.3746 | 387.3399 | 456.9576 |
| ENSSSCG00000006245 | 8455.803031 | 1.39194544   | 9.69E-08 | 8.69E-06 | 10619.92 | 11744.44 | 14371.86 | 3371.626 | 5804.792 | 4822.179 |
| ENSSSCG00000010554 | 547070.9886 | 1.82546035   | 1.13E-07 | 1.01E-05 | 1149930  | 514409.3 | 895754   | 171724.8 | 363941.3 | 186666.7 |
| ENSSSCG00000029752 | 90.87398995 | 3.51361332   | 1.19E-07 | 1.05E-05 | 330.8207 | 34.97394 | 135.5647 | 21.91956 | 10.61205 | 11.35298 |
| ENSSSCG00000034871 | 88.37806962 | -9.94239958  | 1.22E-07 | 1.07E-05 | 0        | 0        | 0        | 286.9469 | 219.6695 | 23.65205 |
| ENSSSCG00000000363 | 400.6691663 | 1.842763663  | 1.25E-07 | 1.1E-05  | 403.9089 | 539.1816 | 936.9916 | 146.4625 | 165.548  | 211.9223 |
| ENSSSCG00000038970 | 49.90760314 | -2.823185098 | 1.29E-07 | 1.13E-05 | 10.57857 | 15.54397 | 10.9648  | 91.6636  | 64.73351 | 105.9612 |
| ENSSSCG00000034156 | 2511.10732  | -1.296688496 | 1.31E-07 | 1.13E-05 | 1240.577 | 1331.924 | 1786.265 | 3753.226 | 3959.356 | 2995.295 |

|                    |             |              |          |          |          |          |          |          |          |          |
|--------------------|-------------|--------------|----------|----------|----------|----------|----------|----------|----------|----------|
| ENSSSCG00000009281 | 552.2950647 | -1.27062242  | 1.42E-07 | 1.22E-05 | 352.9395 | 303.1075 | 314.9887 | 836.9285 | 720.5582 | 785.248  |
| ENSSSCG00000031144 | 334.7814142 | 2.535750876  | 1.52E-07 | 1.3E-05  | 853.9789 | 147.6677 | 711.7149 | 96.64532 | 78.52918 | 120.1524 |
| ENSSSCG00000025085 | 403.4852621 | -1.854633932 | 1.58E-07 | 1.35E-05 | 239.4603 | 166.1262 | 118.6192 | 699.4331 | 798.0262 | 399.2466 |
| ENSSSCG00000000135 | 62.21881657 | -2.633308174 | 1.62E-07 | 1.36E-05 | 19.23376 | 10.68648 | 21.92959 | 79.70748 | 109.3041 | 132.4515 |
| ENSSSCG00000040581 | 504.3706008 | -2.069493702 | 1.62E-07 | 1.36E-05 | 112.5175 | 136.0098 | 333.9279 | 993.3544 | 576.2344 | 874.1797 |
| ENSSSCG00000008019 | 891.0242836 | 1.486119408  | 1.93E-07 | 1.62E-05 | 1422.337 | 861.719  | 1655.684 | 447.3582 | 494.5216 | 464.5262 |
| ENSSSCG00000013366 | 3174.307243 | 1.180142479  | 2.02E-07 | 1.68E-05 | 5280.629 | 3827.704 | 4105.818 | 2005.639 | 2006.739 | 1819.315 |
| ENSSSCG00000001572 | 220.7248637 | 1.810029253  | 2.09E-07 | 1.73E-05 | 388.5219 | 375.9699 | 266.1455 | 129.5247 | 65.79471 | 98.39252 |
| ENSSSCG00000011090 | 1883.634703 | -1.413032618 | 2.13E-07 | 1.75E-05 | 769.3504 | 1207.572 | 1108.441 | 2348.382 | 3483.936 | 2384.126 |
| ENSSSCG00000012050 | 2078.480406 | 2.292288874  | 2.16E-07 | 1.76E-05 | 4802.67  | 922.9234 | 4631.131 | 804.0492 | 512.5621 | 797.547  |
| ENSSSCG00000025034 | 3763.569451 | 1.355059003  | 2.16E-07 | 1.76E-05 | 7106.874 | 4879.836 | 4248.36  | 2212.879 | 1788.131 | 2345.337 |
| ENSSSCG00000027266 | 2409.829241 | 3.754474096  | 2.24E-07 | 1.81E-05 | 7465.584 | 2293.708 | 3702.114 | 430.4204 | 448.8897 | 118.2602 |
| ENSSSCG00000021220 | 1348.891479 | 1.804724414  | 2.29E-07 | 1.85E-05 | 2346.519 | 981.2133 | 2964.482 | 635.6671 | 635.6618 | 529.8059 |
| ENSSSCG00000022849 | 276.2239056 | -1.772188042 | 2.88E-07 | 2.3E-05  | 82.70517 | 169.0407 | 123.6032 | 544.0035 | 384.1562 | 353.8346 |
| ENSSSCG00000034192 | 336.7774933 | 1.89127632   | 2.88E-07 | 2.3E-05  | 429.8745 | 321.566  | 840.3021 | 136.4991 | 131.5894 | 160.8339 |
| ENSSSCG00000015930 | 74.82512892 | 2.8828704    | 2.9E-07  | 2.3E-05  | 179.8357 | 151.5537 | 63.79518 | 23.91224 | 22.28531 | 7.568655 |
| ENSSSCG00000009322 | 1334.647467 | -1.579929772 | 2.93E-07 | 2.31E-05 | 681.8368 | 775.2557 | 550.2334 | 1842.239 | 1302.099 | 2856.221 |
| ENSSSCG00000029521 | 591.6270527 | 1.527487237  | 3.04E-07 | 2.38E-05 | 915.5269 | 598.443  | 1121.4   | 292.925  | 356.5649 | 264.9029 |
| ENSSSCG00000004291 | 493.9375151 | 2.125909146  | 3.15E-07 | 2.45E-05 | 1133.83  | 928.7524 | 348.8799 | 157.4223 | 124.161  | 270.5794 |
| ENSSSCG00000015009 | 1131.126588 | -1.473997178 | 3.65E-07 | 2.83E-05 | 472.1888 | 863.662  | 460.5214 | 1608.098 | 1744.621 | 1637.668 |
| ENSSSCG00000039761 | 83.22862537 | 2.265407438  | 3.73E-07 | 2.88E-05 | 184.6441 | 97.14984 | 131.5775 | 34.87202 | 26.53013 | 24.59813 |
| ENSSSCG00000012536 | 64.89110288 | -2.414979652 | 3.84E-07 | 2.95E-05 | 15.38701 | 29.14495 | 16.94559 | 121.5539 | 96.56966 | 109.7455 |
| ENSSSCG00000017873 | 666.282408  | 1.305276619  | 4.17E-07 | 3.18E-05 | 1120.366 | 788.8567 | 936.9916 | 417.4679 | 330.0348 | 403.977  |
| ENSSSCG00000007133 | 483.7032591 | 1.314284583  | 4.48E-07 | 3.4E-05  | 562.5875 | 755.8257 | 751.5869 | 291.9286 | 253.628  | 286.6628 |
| ENSSSCG00000031220 | 15.15976263 | -7.398093373 | 4.58E-07 | 3.46E-05 | 0        | 0        | 0        | 23.91224 | 42.4482  | 24.59813 |
| ENSSSCG00000017956 | 1015.106093 | 1.914996134  | 4.6E-07  | 3.46E-05 | 2680.224 | 1228.945 | 905.0941 | 490.201  | 287.5866 | 498.5852 |
| ENSSSCG00000006590 | 110.0033736 | 3.014734872  | 5.23E-07 | 3.92E-05 | 383.7135 | 64.11889 | 139.5519 | 38.8574  | 14.85687 | 18.92164 |
| ENSSSCG00000015595 | 289.0199611 | 2.143976853  | 5.37E-07 | 4E-05    | 454.8784 | 621.7589 | 337.9151 | 108.6014 | 43.50941 | 167.4565 |
| ENSSSCG00000011714 | 262.4635245 | 1.637527773  | 5.4E-07  | 4E-05    | 397.1771 | 337.1099 | 457.531  | 175.3565 | 99.75328 | 107.8533 |
| ENSSSCG00000016328 | 21.36196405 | 5.383268137  | 5.92E-07 | 4.34E-05 | 36.54414 | 41.77443 | 46.84958 | 0.996343 | 1.061205 | 0.946082 |
| ENSSSCG00000040535 | 640.4118589 | 1.93597936   | 5.9E-07  | 4.34E-05 | 1000.155 | 588.728  | 1457.321 | 141.4808 | 367.177  | 287.6089 |
| ENSSSCG00000010253 | 4174.522957 | 1.343567686  | 7.32E-07 | 5.35E-05 | 6048.056 | 4258.077 | 7661.402 | 2236.791 | 2021.596 | 2821.216 |
| ENSSSCG00000023362 | 309.2545939 | 1.731492889  | 7.77E-07 | 5.65E-05 | 577.9745 | 269.105  | 579.1406 | 134.5064 | 127.3446 | 167.4565 |
| ENSSSCG00000015512 | 122.3028487 | -2.336215343 | 8.19E-07 | 5.92E-05 | 21.15714 | 56.3469  | 43.85918 | 289.9359 | 112.4877 | 210.0302 |
| ENSSSCG00000008984 | 337.9031832 | 2.12693956   | 9.43E-07 | 6.79E-05 | 726.0744 | 336.1384 | 587.115  | 124.5429 | 200.5678 | 52.98059 |

|                    |             |              |          |          |          |          |          |          |          |          |
|--------------------|-------------|--------------|----------|----------|----------|----------|----------|----------|----------|----------|
| ENSSSCG00000016469 | 29.68194272 | 4.869519319  | 9.53E-07 | 6.82E-05 | 47.12271 | 15.54397 | 109.648  | 1.992687 | 0        | 3.784328 |
| ENSSSCG00000004075 | 40.02605215 | 3.054891198  | 9.61E-07 | 6.84E-05 | 66.35647 | 93.26384 | 54.82398 | 12.95247 | 4.24482  | 8.514737 |
| ENSSSCG00000027144 | 120.5310836 | -1.862506943 | 9.64E-07 | 6.84E-05 | 69.24153 | 37.88844 | 48.84318 | 200.265  | 164.4868 | 202.4615 |
| ENSSSCG00000011250 | 10816.13635 | -1.02741421  | 1.02E-06 | 7.22E-05 | 6787.594 | 7648.607 | 6922.773 | 13947.81 | 16355.29 | 13234.74 |
| ENSSSCG00000036801 | 561.4843349 | 5.336071067  | 1.04E-06 | 7.28E-05 | 1966.652 | 452.7182 | 868.2125 | 2.98903  | 24.40772 | 53.92667 |
| ENSSSCG00000017991 | 161.7680378 | 1.79406258   | 1.05E-06 | 7.36E-05 | 307.7402 | 186.5277 | 259.1679 | 95.64897 | 56.24387 | 65.27965 |
| ENSSSCG00000010814 | 113.600338  | -5.946675475 | 1.1E-06  | 7.64E-05 | 0        | 1.942997 | 8.971197 | 203.2541 | 96.56966 | 370.8641 |
| ENSSSCG00000026850 | 1660.664935 | 1.260806025  | 1.11E-06 | 7.64E-05 | 1855.096 | 2604.587 | 2570.746 | 796.0784 | 944.4725 | 1193.009 |
| ENSSSCG00000036213 | 807.4950173 | -1.328441244 | 1.1E-06  | 7.64E-05 | 352.9395 | 603.3005 | 423.6398 | 1152.769 | 1047.409 | 1264.912 |
| ENSSSCG00000008434 | 369.9231477 | 1.459125423  | 1.11E-06 | 7.65E-05 | 640.4842 | 476.0342 | 511.3582 | 180.3382 | 154.9359 | 256.3882 |
| ENSSSCG00000003434 | 1891.856277 | 1.109635247  | 1.17E-06 | 7.97E-05 | 2634.063 | 2216.959 | 2905.671 | 1067.084 | 1233.12  | 1294.24  |
| ENSSSCG00000017086 | 552.2732126 | -2.413723591 | 1.22E-06 | 8.32E-05 | 268.3109 | 150.5822 | 104.664  | 243.1078 | 1038.92  | 1508.055 |
| ENSSSCG00000010073 | 246.9012264 | 2.233924394  | 1.26E-06 | 8.52E-05 | 476.0355 | 160.2972 | 585.1214 | 82.69651 | 125.2222 | 52.0345  |
| ENSSSCG00000035828 | 157.8629261 | 2.138355734  | 1.29E-06 | 8.69E-05 | 334.6674 | 162.2402 | 275.1167 | 88.67457 | 29.71374 | 56.76491 |
| ENSSSCG00000000713 | 44.56638572 | 3.113033694  | 1.3E-06  | 8.7E-05  | 38.46752 | 115.6083 | 85.72477 | 5.978061 | 7.428436 | 14.19123 |
| ENSSSCG00000013632 | 49.18301111 | 3.233164019  | 1.31E-06 | 8.78E-05 | 122.1344 | 66.06189 | 78.74717 | 11.95612 | 1.061205 | 15.13731 |
| ENSSSCG00000032337 | 13.82141527 | 7.231423231  | 1.33E-06 | 8.86E-05 | 37.50583 | 16.51547 | 28.90719 | 0        | 0        | 0        |
| ENSSSCG0000001552  | 30.65173021 | -4.706676335 | 1.36E-06 | 9E-05    | 4.80844  | 1.942997 | 0        | 31.88299 | 22.28531 | 122.9906 |
| ENSSSCG00000034761 | 72.33016727 | -2.367874735 | 1.37E-06 | 9.06E-05 | 18.27207 | 26.23046 | 25.91679 | 156.4259 | 139.0179 | 68.1179  |
| ENSSSCG00000012525 | 28.69802616 | -4.380045985 | 1.48E-06 | 9.7E-05  | 0        | 0.971498 | 6.977597 | 57.78792 | 74.28436 | 32.16678 |
| ENSSSCG00000038429 | 73.3908386  | 2.740669984  | 1.53E-06 | 0.0001   | 225.9967 | 89.37785 | 67.78237 | 13.94881 | 14.85687 | 28.38246 |
| ENSSSCG00000002456 | 179.9731552 | -2.92471508  | 1.61E-06 | 0.000105 | 10.57857 | 99.09283 | 15.94879 | 225.1736 | 449.951  | 279.0942 |
| ENSSSCG00000012448 | 1606.521023 | -1.040253014 | 1.62E-06 | 0.000105 | 1042.47  | 1079.335 | 1031.688 | 1934.899 | 2372.855 | 2177.881 |
| ENSSSCG00000005688 | 318.1619935 | 1.582395793  | 1.68E-06 | 0.000108 | 534.6985 | 485.7492 | 410.6814 | 231.1517 | 119.9162 | 126.775  |
| ENSSSCG00000009612 | 132.9990596 | 1.733144182  | 1.68E-06 | 0.000108 | 257.7324 | 162.2402 | 193.3791 | 58.78426 | 70.03954 | 55.81883 |
| ENSSSCG00000033262 | 21597.92159 | 1.436372839  | 1.76E-06 | 0.000112 | 35772.87 | 17586.06 | 41265.51 | 11239.75 | 11008.94 | 12714.39 |
| ENSSSCG00000040629 | 611.4534595 | 1.446921518  | 1.76E-06 | 0.000112 | 1128.06  | 605.2435 | 950.9468 | 399.5337 | 272.7297 | 312.207  |
| ENSSSCG00000027275 | 23.37948807 | -5.54038091  | 1.78E-06 | 0.000113 | 0        | 0        | 2.990399 | 72.73307 | 45.63182 | 18.92164 |
| ENSSSCG00000038228 | 23.38488057 | -5.546868798 | 1.89E-06 | 0.00012  | 0.961688 | 0        | 1.993599 | 11.95612 | 65.79471 | 59.60316 |
| ENSSSCG00000010698 | 430.961664  | -1.936090727 | 1.91E-06 | 0.00012  | 239.4603 | 68.00488 | 228.2671 | 847.8883 | 668.5592 | 533.5902 |
| ENSSSCG00000021418 | 8972.601365 | 1.528663368  | 1.94E-06 | 0.000122 | 16120.78 | 6936.498 | 16921.67 | 3733.299 | 5182.926 | 4940.44  |
| ENSSSCG00000017178 | 237.0826966 | 2.079385074  | 2.05E-06 | 0.000128 | 620.2887 | 193.3282 | 336.9183 | 75.7221  | 64.73351 | 131.5054 |
| ENSSSCG00000029944 | 320699.5743 | 1.52933649   | 2.34E-06 | 0.000145 | 576775.2 | 254556.9 | 597771.8 | 120949.1 | 188044.5 | 186100   |
| ENSSSCG00000009240 | 74.98865363 | -2.279215814 | 2.36E-06 | 0.000146 | 40.39089 | 18.45847 | 17.94239 | 95.64897 | 142.2015 | 135.2897 |
| ENSSSCG00000000843 | 2614.054872 | 1.305780513  | 2.43E-06 | 0.00015  | 4221.81  | 2937.811 | 4007.134 | 1479.57  | 1954.74  | 1083.264 |



|                    |             |              |          |          |          |          |          |          |          |          |
|--------------------|-------------|--------------|----------|----------|----------|----------|----------|----------|----------|----------|
| ENSSSCG00000039009 | 93.24694167 | 2.175234901  | 2.46E-06 | 0.000151 | 121.1727 | 143.7818 | 193.3791 | 36.86471 | 16.97928 | 47.3041  |
| ENSSSCG00000001457 | 2807.663318 | 1.631363484  | 2.49E-06 | 0.000152 | 4298.745 | 2121.752 | 6314.726 | 1067.084 | 1597.114 | 1446.559 |
| ENSSSCG00000032251 | 520.1297805 | 1.300743668  | 2.57E-06 | 0.000157 | 855.9023 | 713.0798 | 650.9101 | 237.1297 | 292.8926 | 370.8641 |
| ENSSSCG00000011884 | 1069.151798 | 1.256048729  | 2.61E-06 | 0.000158 | 1863.751 | 1558.283 | 1099.47  | 593.8207 | 712.0686 | 587.5169 |
| ENSSSCG00000015830 | 14.37953967 | 7.288198736  | 2.65E-06 | 0.00016  | 34.62077 | 6.800488 | 44.85598 | 0        | 0        | 0        |
| ENSSSCG00000027565 | 475.2855897 | 1.3090131    | 2.72E-06 | 0.000164 | 829.9367 | 617.873  | 584.1246 | 262.0383 | 231.3427 | 326.3983 |
| ENSSSCG00000002697 | 636.5104425 | 1.403631235  | 2.76E-06 | 0.000165 | 1106.903 | 753.8827 | 911.0748 | 301.8921 | 268.4849 | 476.8253 |
| ENSSSCG00000029163 | 846.7466601 | 1.740128576  | 2.78E-06 | 0.000166 | 1561.781 | 1682.635 | 665.8621 | 464.2961 | 236.6487 | 469.2566 |
| ENSSSCG00000000203 | 45.84602464 | 3.283821234  | 2.8E-06  | 0.000166 | 126.9428 | 50.51791 | 71.76957 | 6.974404 | 16.97928 | 1.892164 |
| ENSSSCG00000000171 | 366.1344709 | 1.48608138   | 2.94E-06 | 0.000174 | 732.8062 | 393.4568 | 492.419  | 197.276  | 222.8531 | 157.9957 |
| ENSSSCG00000000773 | 125.1247204 | -1.861325496 | 3.02E-06 | 0.000178 | 67.31816 | 40.80293 | 53.82718 | 213.2175 | 244.0772 | 131.5054 |
| ENSSSCG00000001866 | 1424.988086 | -1.247846627 | 3.03E-06 | 0.000178 | 675.105  | 1140.539 | 717.6957 | 2028.555 | 2139.389 | 1848.644 |
| ENSSSCG00000016831 | 245.0330254 | -1.85413196  | 3.14E-06 | 0.000184 | 105.7857 | 138.9243 | 73.76317 | 588.839  | 331.096  | 231.7901 |
| ENSSSCG00000025588 | 160.057897  | 2.26755958   | 3.19E-06 | 0.000186 | 424.1044 | 98.12133 | 273.1231 | 49.81717 | 41.387   | 73.79439 |
| ENSSSCG00000012638 | 80.52864668 | -2.208680507 | 3.21E-06 | 0.000186 | 18.27207 | 41.77443 | 25.91679 | 171.3711 | 93.38605 | 132.4515 |
| ENSSSCG00000017192 | 155.8504737 | 1.805137724  | 3.26E-06 | 0.000189 | 175.9889 | 193.3282 | 357.8511 | 60.77695 | 65.79471 | 81.36304 |
| ENSSSCG00000034469 | 46.50514096 | 3.087323197  | 3.31E-06 | 0.000191 | 89.43698 | 117.5513 | 42.86238 | 8.967091 | 3.183615 | 17.02947 |
| ENSSSCG00000029902 | 103.7253026 | 2.154667448  | 3.33E-06 | 0.000191 | 177.9123 | 135.0383 | 195.3727 | 16.93784 | 40.32579 | 56.76491 |
| ENSSSCG00000039311 | 453.496771  | 1.530813725  | 3.36E-06 | 0.000192 | 877.0594 | 447.8607 | 696.7629 | 240.1188 | 168.7316 | 290.4471 |
| ENSSSCG00000008769 | 321.2778349 | 5.255022734  | 3.39E-06 | 0.000193 | 1353.095 | 304.079  | 221.2895 | 35.86836 | 9.550846 | 3.784328 |
| ENSSSCG00000040793 | 16397.98798 | 1.197912961  | 3.44E-06 | 0.000195 | 26101.17 | 17260.61 | 25158.23 | 8119.203 | 9498.847 | 12249.87 |
| ENSSSCG00000040826 | 40.03477326 | 3.843949162  | 3.48E-06 | 0.000197 | 125.0194 | 75.77687 | 23.92319 | 6.974404 | 0        | 8.514737 |
| ENSSSCG00000011501 | 4756.834881 | -1.165502606 | 3.66E-06 | 0.000205 | 2411.913 | 3827.704 | 2560.778 | 6650.593 | 7229.99  | 5860.031 |
| ENSSSCG00000013046 | 2634.370949 | 1.8551734    | 3.65E-06 | 0.000205 | 5741.277 | 1360.098 | 5282.041 | 979.4056 | 1270.262 | 1173.142 |
| ENSSSCG00000017797 | 450.8843259 | -1.295114084 | 3.67E-06 | 0.000205 | 305.8168 | 234.1311 | 243.2191 | 785.1187 | 617.6214 | 519.399  |
| ENSSSCG00000012001 | 1855.254787 | 1.431289131  | 3.88E-06 | 0.000216 | 3063.938 | 2784.314 | 2271.706 | 749.2503 | 1519.646 | 742.6743 |
| ENSSSCG00000001770 | 5997.560082 | 1.108666077  | 3.97E-06 | 0.00022  | 9867.88  | 7619.462 | 7097.213 | 3265.018 | 4495.265 | 3640.523 |
| ENSSSCG00000025741 | 107.146831  | 1.988524819  | 3.98E-06 | 0.00022  | 216.3798 | 121.4373 | 175.4367 | 45.8318  | 57.30507 | 26.49029 |
| ENSSSCG00000014919 | 748.1553677 | 1.111094442  | 4.05E-06 | 0.000223 | 1015.542 | 982.1848 | 1070.563 | 399.5337 | 543.337  | 477.7714 |
| ENSSSCG00000010385 | 896.8914061 | -1.121608841 | 4.19E-06 | 0.00023  | 617.4037 | 521.6946 | 555.2174 | 1375.95  | 1306.343 | 1004.739 |
| ENSSSCG00000037762 | 42.57449436 | -2.644660217 | 4.29E-06 | 0.000235 | 6.731816 | 15.54397 | 12.95839 | 56.79158 | 84.89641 | 78.5248  |
| ENSSSCG00000003524 | 1874.224671 | 1.275562195  | 4.41E-06 | 0.00024  | 3069.708 | 2861.063 | 2027.49  | 1413.811 | 828.8012 | 1044.474 |
| ENSSSCG00000006099 | 17.36070656 | 6.583248142  | 4.52E-06 | 0.000245 | 24.0422  | 26.23046 | 52.83038 | 0        | 1.061205 | 0        |
| ENSSSCG00000002306 | 2715.675603 | 1.351187032  | 4.67E-06 | 0.000252 | 4676.689 | 2275.249 | 4753.737 | 1487.541 | 1661.847 | 1438.991 |
| ENSSSCG00000002919 | 536.6241853 | 1.993994889  | 4.71E-06 | 0.000253 | 1586.785 | 490.6067 | 496.4062 | 266.0237 | 135.8343 | 244.0891 |

|                    |             |              |          |          |          |          |          |          |          |          |
|--------------------|-------------|--------------|----------|----------|----------|----------|----------|----------|----------|----------|
| ENSSSCG00000012278 | 209.4396449 | 1.460056306  | 4.75E-06 | 0.000255 | 331.7823 | 348.7679 | 241.2255 | 121.5539 | 91.26364 | 122.0446 |
| ENSSSCG00000037322 | 13.98395223 | -7.282694178 | 4.77E-06 | 0.000255 | 0        | 0        | 0        | 62.76964 | 11.67326 | 9.460819 |
| ENSSSCG00000005490 | 93.07015794 | 2.065964489  | 4.9E-06  | 0.000261 | 161.5636 | 178.7557 | 110.6448 | 44.83546 | 19.10169 | 43.51977 |
| ENSSSCG00000015799 | 140.434213  | 1.800204325  | 4.95E-06 | 0.000263 | 304.8551 | 192.3567 | 157.4943 | 47.82449 | 61.54989 | 78.5248  |
| ENSSSCG00000000018 | 8199.754446 | 1.131733161  | 5.11E-06 | 0.00027  | 11344.07 | 10006.43 | 12431.09 | 3771.16  | 6047.808 | 5597.967 |
| ENSSSCG00000013901 | 808.8905947 | 1.531191638  | 5.17E-06 | 0.000273 | 1659.873 | 1058.933 | 887.1517 | 565.9231 | 264.2401 | 417.2221 |
| ENSSSCG00000012277 | 533.687583  | 1.54925286   | 5.24E-06 | 0.000275 | 978.0367 | 418.7158 | 989.822  | 248.0895 | 303.5047 | 263.9569 |
| ENSSSCG00000016423 | 21.02965885 | -4.35803377  | 5.32E-06 | 0.000279 | 0        | 3.885993 | 1.993599 | 53.80255 | 28.65254 | 37.84328 |
| ENSSSCG00000002529 | 718.3457396 | -1.329993521 | 5.36E-06 | 0.000279 | 329.859  | 480.8917 | 415.6654 | 1061.106 | 1297.854 | 724.6987 |
| ENSSSCG00000025881 | 3477.538578 | 1.475372057  | 5.36E-06 | 0.000279 | 7285.748 | 2906.723 | 5153.454 | 1504.479 | 2316.611 | 1698.217 |
| ENSSSCG00000006372 | 577.2761178 | 1.296722437  | 5.61E-06 | 0.00029  | 873.2127 | 974.4128 | 614.0286 | 410.4935 | 289.709  | 301.8001 |
| ENSSSCG00000001456 | 5087.945368 | 1.330787649  | 5.69E-06 | 0.000292 | 7562.714 | 4641.819 | 9639.052 | 2335.429 | 3448.917 | 2899.741 |
| ENSSSCG00000002432 | 62.96730678 | 2.406678317  | 5.7E-06  | 0.000292 | 132.7129 | 77.71987 | 107.6544 | 16.93784 | 10.61205 | 32.16678 |
| ENSSSCG00000015423 | 1372.625782 | -1.337465662 | 5.7E-06  | 0.000292 | 630.8673 | 1091.964 | 612.035  | 1924.936 | 2385.589 | 1590.364 |
| ENSSSCG00000027487 | 262.3855136 | 1.906898705  | 5.75E-06 | 0.000294 | 722.2277 | 292.421  | 228.2671 | 93.65629 | 107.1817 | 130.5593 |
| ENSSSCG00000036507 | 13.37697256 | 7.184052082  | 5.79E-06 | 0.000295 | 5.770128 | 48.57492 | 25.91679 | 0        | 0        | 0        |
| ENSSSCG00000005740 | 41.02731372 | 3.698234321  | 5.88E-06 | 0.000299 | 113.4792 | 15.54397 | 99.67996 | 3.985374 | 2.12241  | 11.35298 |
| ENSSSCG00000015911 | 81.71553333 | -2.858259613 | 5.95E-06 | 0.000301 | 5.770128 | 45.66042 | 7.974397 | 153.4369 | 115.6714 | 161.78   |
| ENSSSCG00000015355 | 1167.410107 | -1.676461486 | 5.98E-06 | 0.000302 | 276.9661 | 624.6734 | 767.5357 | 1266.353 | 2536.28  | 1532.653 |
| ENSSSCG00000001513 | 299.7074865 | 1.650928232  | 6.1E-06  | 0.000306 | 586.6297 | 238.9886 | 538.2718 | 167.3857 | 141.1403 | 125.8289 |
| ENSSSCG00000007436 | 129.6539249 | 2.211386528  | 6.35E-06 | 0.000318 | 200.9928 | 339.0529 | 99.67996 | 25.90493 | 58.36628 | 53.92667 |
| ENSSSCG00000012548 | 535.3419344 | -1.49681469  | 6.53E-06 | 0.000326 | 183.6824 | 430.3738 | 226.2735 | 740.2832 | 867.0045 | 764.4342 |
| ENSSSCG00000008230 | 863.9511437 | 1.723481591  | 6.68E-06 | 0.000332 | 1949.342 | 567.355  | 1462.305 | 343.7385 | 349.1365 | 511.8303 |
| ENSSSCG00000004234 | 84.11144528 | 3.165527953  | 6.73E-06 | 0.000333 | 53.85453 | 259.3901 | 140.5487 | 11.95612 | 36.08097 | 2.838246 |
| ENSSSCG00000013614 | 495.5416576 | -1.459723177 | 6.76E-06 | 0.000334 | 179.8357 | 226.3591 | 386.7583 | 749.2503 | 607.0093 | 824.0373 |
| ENSSSCG00000033095 | 736.2640185 | -1.03977868  | 6.8E-06  | 0.000335 | 481.8057 | 502.2646 | 461.5182 | 1094.981 | 924.3096 | 952.7045 |
| ENSSSCG00000006800 | 564.250142  | 1.395410597  | 6.82E-06 | 0.000335 | 924.1821 | 997.7288 | 531.2942 | 324.808  | 245.1384 | 362.3494 |
| ENSSSCG00000026092 | 1725.649985 | 1.3709931    | 6.87E-06 | 0.000335 | 3094.712 | 1448.504 | 2923.613 | 869.8078 | 1127     | 890.2631 |
| ENSSSCG00000033750 | 46.72912113 | -2.468208502 | 6.85E-06 | 0.000335 | 17.31038 | 13.60098 | 11.9616  | 53.80255 | 106.1205 | 77.57872 |
| ENSSSCG00000014378 | 25.25192499 | -3.332629683 | 7.32E-06 | 0.000356 | 3.846752 | 4.857492 | 4.983998 | 29.8903  | 53.06025 | 54.87275 |
| ENSSSCG00000029668 | 202.9422979 | 1.411625372  | 7.56E-06 | 0.000366 | 283.698  | 289.5065 | 311.9983 | 129.5247 | 82.774   | 120.1524 |
| ENSSSCG00000003894 | 6801.596763 | 1.391657292  | 7.63E-06 | 0.000368 | 10531.44 | 6637.277 | 12379.25 | 5238.774 | 3375.693 | 2647.137 |
| ENSSSCG00000017700 | 17.71643183 | 5.696108279  | 7.69E-06 | 0.00037  | 38.46752 | 38.85993 | 26.91359 | 0.996343 | 1.061205 | 0        |
| ENSSSCG00000007278 | 670.4991933 | 1.082301758  | 7.74E-06 | 0.000371 | 1022.274 | 886.0065 | 824.3533 | 408.5008 | 402.1967 | 479.6635 |
| ENSSSCG00000009405 | 3313.21417  | -1.314850844 | 7.92E-06 | 0.000379 | 1681.031 | 2539.497 | 1479.251 | 3616.727 | 4236.331 | 6326.45  |

|                    |             |              |          |          |          |          |          |          |          |          |
|--------------------|-------------|--------------|----------|----------|----------|----------|----------|----------|----------|----------|
| ENSSSCG00000012795 | 525.9103977 | 1.766120805  | 7.94E-06 | 0.000379 | 1138.639 | 340.9959 | 958.9212 | 309.8628 | 202.6902 | 204.3537 |
| ENSSSCG00000028997 | 820.8888293 | -1.066062684 | 8.04E-06 | 0.000382 | 540.4686 | 538.2101 | 513.3518 | 1312.184 | 1023.002 | 998.1164 |
| ENSSSCG00000008749 | 601.0373546 | -1.287462582 | 8.56E-06 | 0.000405 | 351.0161 | 413.8583 | 283.0911 | 1117.897 | 736.4763 | 703.8849 |
| ENSSSCG00000022536 | 510.0458027 | 1.12544089   | 8.73E-06 | 0.000412 | 765.5036 | 598.443  | 734.6413 | 314.8445 | 293.9538 | 352.8885 |
| ENSSSCG00000009231 | 96.92535378 | 2.167091053  | 8.82E-06 | 0.000414 | 156.7551 | 183.6132 | 135.5647 | 40.85008 | 12.73446 | 52.0345  |
| ENSSSCG00000025672 | 245.9854694 | -1.6043478   | 8.82E-06 | 0.000414 | 96.1688  | 155.4397 | 113.6352 | 521.0876 | 341.708  | 247.8735 |
| ENSSSCG00000004728 | 302.6523238 | 1.303040363  | 8.98E-06 | 0.00042  | 483.729  | 457.5757 | 350.8735 | 210.2285 | 160.242  | 153.2653 |
| ENSSSCG00000032844 | 101.830679  | -2.126699279 | 9.09E-06 | 0.000424 | 16.3487  | 44.68892 | 52.83038 | 143.4735 | 224.9755 | 128.6671 |
| ENSSSCG00000025910 | 1857.954438 | -1.010842554 | 9.18E-06 | 0.000427 | 1365.597 | 1063.791 | 1267.929 | 2799.725 | 2326.162 | 2324.523 |
| ENSSSCG00000021084 | 1111.881251 | 1.915087832  | 9.22E-06 | 0.000427 | 3404.375 | 887.9495 | 980.8508 | 564.9267 | 345.9529 | 487.2322 |
| ENSSSCG00000003374 | 31.7273778  | -4.355715793 | 9.41E-06 | 0.000435 | 0.961688 | 0.971498 | 6.977597 | 7.970748 | 81.71279 | 91.76994 |
| ENSSSCG00000033051 | 48.93415402 | 2.400001071  | 9.69E-06 | 0.000446 | 92.32205 | 73.83387 | 80.74077 | 23.91224 | 9.550846 | 13.24515 |
| ENSSSCG00000038660 | 96.52278853 | 1.948459914  | 9.77E-06 | 0.000449 | 191.3759 | 99.09283 | 169.4559 | 53.80255 | 36.08097 | 29.32854 |
| ENSSSCG00000039476 | 121.7280361 | 1.810681213  | 1.01E-05 | 0.000461 | 207.7246 | 118.5228 | 242.2223 | 42.84277 | 50.93784 | 68.1179  |
| ENSSSCG00000039573 | 10369.03364 | 4.16764203   | 1.02E-05 | 0.000463 | 16012.1  | 2771.685 | 40151.09 | 1327.13  | 1015.573 | 936.6211 |
| ENSSSCG00000040288 | 87.72400399 | 2.280688537  | 1.02E-05 | 0.000465 | 184.6441 | 159.3257 | 92.70236 | 45.8318  | 11.67326 | 32.16678 |
| ENSSSCG00000027935 | 136.7912303 | -2.032084771 | 1.03E-05 | 0.000469 | 27.88895 | 82.57736 | 50.83678 | 298.903  | 131.5894 | 228.9518 |
| ENSSSCG00000012397 | 232.3949331 | 1.2472172    | 1.05E-05 | 0.000475 | 345.246  | 309.908  | 325.9535 | 149.4515 | 129.467  | 134.3436 |
| ENSSSCG00000013513 | 167.1490891 | 1.791669567  | 1.07E-05 | 0.00048  | 295.2382 | 328.3664 | 154.5039 | 46.82814 | 88.08002 | 89.87778 |
| ENSSSCG00000038968 | 1531.714675 | -1.144299535 | 1.07E-05 | 0.000481 | 851.0939 | 1262.948 | 748.5965 | 2075.383 | 2046.003 | 2206.263 |
| ENSSSCG00000000576 | 27995.39693 | -1.037985215 | 1.07E-05 | 0.000482 | 17126.7  | 17025.51 | 20860.03 | 37926.81 | 44987.67 | 30045.67 |
| ENSSSCG00000032381 | 2070.102743 | 1.170470025  | 1.08E-05 | 0.000484 | 3243.774 | 1980.885 | 3375.163 | 1128.857 | 1407.158 | 1284.779 |
| ENSSSCG00000006900 | 934.5236253 | -1.037904007 | 1.12E-05 | 0.000498 | 528.9284 | 701.4218 | 606.0542 | 1274.323 | 1340.302 | 1156.112 |
| ENSSSCG00000027607 | 187.9572088 | 1.949330653  | 1.21E-05 | 0.000537 | 418.3343 | 154.4682 | 322.9631 | 39.85374 | 96.56966 | 95.55427 |
| ENSSSCG00000002831 | 414.5635244 | -1.429892811 | 1.24E-05 | 0.000542 | 266.3876 | 144.7533 | 262.1583 | 767.1845 | 580.4792 | 466.4184 |
| ENSSSCG00000002868 | 1494.946702 | 1.035903237  | 1.23E-05 | 0.000542 | 2049.357 | 2035.289 | 1944.756 | 1156.755 | 786.353  | 997.1703 |
| ENSSSCG00000023666 | 16881.87863 | 1.165855168  | 1.23E-05 | 0.000542 | 29254.55 | 16741.83 | 24067.73 | 10609.07 | 8434.458 | 12183.64 |
| ENSSSCG00000032242 | 363.6910588 | 1.713507702  | 1.24E-05 | 0.000542 | 804.9328 | 314.7655 | 552.227  | 144.4698 | 249.3832 | 116.3681 |
| ENSSSCG00000034570 | 1032.839044 | 1.274827569  | 1.23E-05 | 0.000542 | 1723.345 | 982.1848 | 1679.607 | 557.9523 | 509.3784 | 744.5665 |
| ENSSSCG00000007522 | 2086.374397 | 1.246543666  | 1.24E-05 | 0.000543 | 4196.806 | 2269.42  | 2340.485 | 1312.184 | 1090.919 | 1308.431 |
| ENSSSCG00000031951 | 37.81108595 | -2.649366427 | 1.25E-05 | 0.000544 | 14.42532 | 8.743485 | 7.974397 | 49.81717 | 89.14123 | 56.76491 |
| ENSSSCG00000004787 | 491.0918613 | 1.281509877  | 1.26E-05 | 0.000547 | 667.4115 | 532.3811 | 888.1485 | 246.0968 | 265.3013 | 347.2121 |
| ENSSSCG00000012517 | 13.16231103 | -7.196664206 | 1.27E-05 | 0.00055  | 0        | 0        | 0        | 41.84643 | 2.12241  | 35.00503 |
| ENSSSCG00000017355 | 2637.093806 | 1.46827811   | 1.3E-05  | 0.00056  | 5821.097 | 1998.372 | 3802.791 | 1293.254 | 1288.303 | 1618.746 |
| ENSSSCG00000024810 | 264.6006623 | 1.420189563  | 1.31E-05 | 0.000563 | 406.794  | 356.5399 | 392.739  | 162.404  | 91.26364 | 177.8634 |

|                    |             |              |          |          |          |          |          |          |          |          |
|--------------------|-------------|--------------|----------|----------|----------|----------|----------|----------|----------|----------|
| ENSSSCG00000003600 | 6944.64389  | 1.143650324  | 1.33E-05 | 0.000568 | 10092.92 | 6486.694 | 12105.13 | 4263.354 | 4532.407 | 4187.358 |
| ENSSSCG00000013041 | 515.7470852 | 1.197969184  | 1.33E-05 | 0.000568 | 932.8373 | 607.1865 | 615.0254 | 324.808  | 310.9331 | 303.6923 |
| ENSSSCG00000037706 | 13976.85169 | -1.234829373 | 1.34E-05 | 0.000571 | 6054.787 | 12027.15 | 6924.767 | 18426.38 | 22143.11 | 18284.92 |
| ENSSSCG00000013604 | 539.0794306 | 1.197326078  | 1.35E-05 | 0.000574 | 920.3354 | 753.8827 | 578.1438 | 360.6763 | 286.5254 | 334.913  |
| ENSSSCG00000028376 | 17.51747559 | 4.685303862  | 1.37E-05 | 0.000583 | 36.54414 | 40.80293 | 23.92319 | 0.996343 | 0        | 2.838246 |
| ENSSSCG00000022429 | 234.1261978 | -1.718448943 | 1.41E-05 | 0.000594 | 155.7935 | 113.6653 | 57.81438 | 485.2193 | 314.1167 | 278.1481 |
| ENSSSCG0000002309  | 28.8258313  | 4.183577231  | 1.42E-05 | 0.000599 | 55.7779  | 19.42997 | 88.71517 | 7.970748 | 1.061205 | 0        |
| ENSSSCG00000037426 | 266.0637816 | 1.814785287  | 1.42E-05 | 0.000599 | 541.4303 | 378.8844 | 322.9631 | 178.3455 | 49.87664 | 124.8828 |
| ENSSSCG00000032434 | 149.4939149 | 1.960928116  | 1.46E-05 | 0.000613 | 370.2499 | 167.0977 | 176.4335 | 88.67457 | 33.95856 | 60.54924 |
| ENSSSCG00000006793 | 438.1445403 | 1.784086555  | 1.47E-05 | 0.000616 | 880.9062 | 868.5195 | 288.0751 | 153.4369 | 155.9971 | 281.9324 |
| ENSSSCG00000006132 | 254.7050427 | -1.718522217 | 1.5E-05  | 0.000626 | 83.66685 | 175.8412 | 96.68956 | 533.0438 | 230.2815 | 408.7074 |
| ENSSSCG00000034566 | 610.7084789 | 1.790296792  | 1.52E-05 | 0.000631 | 1194.416 | 337.1099 | 1310.791 | 248.0895 | 344.8917 | 228.9518 |
| ENSSSCG00000003928 | 135.7927085 | 1.551973517  | 1.54E-05 | 0.00064  | 233.6902 | 147.6677 | 226.2735 | 65.75867 | 64.73351 | 76.63263 |
| ENSSSCG00000023684 | 126.6462516 | -2.666100817 | 1.55E-05 | 0.00064  | 16.3487  | 22.34446 | 64.79197 | 359.68   | 240.8936 | 55.81883 |
| ENSSSCG00000000252 | 135.6538857 | -2.170249765 | 1.59E-05 | 0.000654 | 42.31427 | 38.85993 | 66.78557 | 336.7641 | 252.5668 | 76.63263 |
| ENSSSCG00000002893 | 124.8703037 | 1.931553176  | 1.63E-05 | 0.00067  | 199.0694 | 266.1905 | 128.5872 | 59.78061 | 26.53013 | 69.06398 |
| ENSSSCG00000009645 | 257.8072484 | -5.15829728  | 1.63E-05 | 0.00067  | 18.27207 | 1.942997 | 21.92959 | 937.5592 | 492.3992 | 74.74047 |
| ENSSSCG00000009197 | 61.59397084 | 3.209432563  | 1.69E-05 | 0.00069  | 202.9162 | 115.6083 | 14.95199 | 5.978061 | 15.91808 | 14.19123 |
| ENSSSCG00000024161 | 38.0222081  | 3.376176319  | 1.69E-05 | 0.00069  | 22.11882 | 55.37541 | 130.5807 | 1.992687 | 9.550846 | 8.514737 |
| ENSSSCG00000040275 | 944.060784  | 1.146368595  | 1.7E-05  | 0.000692 | 1575.245 | 1047.275 | 1278.894 | 562.9341 | 709.9462 | 490.0704 |
| ENSSSCG00000024351 | 507.6255186 | -1.664165016 | 1.72E-05 | 0.000696 | 106.7474 | 271.048  | 352.8671 | 582.8609 | 775.7409 | 956.4888 |
| ENSSSCG00000008799 | 10532.17131 | 1.025733707  | 1.73E-05 | 0.000701 | 16332.35 | 14163.47 | 11882.85 | 6202.238 | 6199.56  | 8412.56  |
| ENSSSCG00000022492 | 303.5186834 | 1.716715875  | 1.74E-05 | 0.000701 | 658.7563 | 454.6612 | 283.0911 | 188.3089 | 76.40677 | 159.8878 |
| ENSSSCG00000033541 | 659.4258713 | 1.722558225  | 1.75E-05 | 0.000704 | 926.1055 | 523.6376 | 1586.905 | 183.3272 | 301.3822 | 435.1977 |
| ENSSSCG00000037158 | 2809.491244 | -1.07025875  | 1.75E-05 | 0.000704 | 1479.076 | 2268.449 | 1690.572 | 3263.025 | 3877.643 | 4278.182 |
| ENSSSCG00000033657 | 75.90296004 | -3.027370451 | 1.77E-05 | 0.000709 | 2.885064 | 36.91694 | 9.967996 | 167.3857 | 50.93784 | 187.3242 |
| ENSSSCG00000036946 | 48.32526296 | 2.339153768  | 1.8E-05  | 0.000718 | 58.66297 | 73.83387 | 109.648  | 10.95978 | 16.97928 | 19.86772 |
| ENSSSCG0000003968  | 31.5915602  | 3.145011338  | 1.87E-05 | 0.000744 | 53.85453 | 88.40635 | 27.91039 | 4.981717 | 10.61205 | 3.784328 |
| ENSSSCG00000024048 | 562.9205699 | -1.310196488 | 1.9E-05  | 0.000754 | 304.8551 | 311.851  | 353.8639 | 510.1279 | 1063.327 | 833.4982 |
| ENSSSCG00000022998 | 676.5124953 | 1.427759272  | 1.92E-05 | 0.000762 | 1157.872 | 537.2386 | 1263.942 | 305.8774 | 430.8493 | 363.2954 |
| ENSSSCG00000034293 | 176.1026601 | 1.566616547  | 1.99E-05 | 0.000785 | 379.8667 | 219.5586 | 190.3887 | 85.68554 | 99.75328 | 81.36304 |
| ENSSSCG00000035567 | 32.16282526 | 3.431587106  | 1.99E-05 | 0.000785 | 90.39867 | 26.23046 | 59.80798 | 4.981717 | 10.61205 | 0.946082 |
| ENSSSCG00000033586 | 478.2177438 | 1.292408101  | 2E-05    | 0.000787 | 771.2738 | 447.8607 | 818.3725 | 318.8299 | 254.6892 | 258.2804 |
| ENSSSCG00000000146 | 5954.674921 | -1.080068508 | 2.09E-05 | 0.000817 | 2926.416 | 3937.483 | 4609.201 | 8563.572 | 6555.064 | 9136.313 |
| ENSSSCG00000008966 | 221.1330205 | 1.405718419  | 2.11E-05 | 0.000822 | 252.9239 | 313.794  | 396.7262 | 142.4771 | 91.26364 | 129.6132 |

|                    |             |              |          |          |          |          |          |          |          |          |
|--------------------|-------------|--------------|----------|----------|----------|----------|----------|----------|----------|----------|
| ENSSSCG00000010224 | 153.0114812 | 2.332081688  | 2.11E-05 | 0.000822 | 288.5064 | 254.5326 | 223.2831 | 40.85008 | 10.61205 | 100.2847 |
| ENSSSCG00000014287 | 262.646042  | 1.518434229  | 2.15E-05 | 0.000835 | 394.2921 | 281.7345 | 492.419  | 148.4552 | 84.89641 | 174.0791 |
| ENSSSCG00000038879 | 198.1741981 | 1.797379015  | 2.15E-05 | 0.000835 | 467.3804 | 135.0383 | 320.9695 | 92.65994 | 85.95761 | 87.03953 |
| ENSSSCG00000001469 | 735.2565499 | 1.213480267  | 2.17E-05 | 0.000839 | 1283.853 | 859.776  | 938.9852 | 500.1644 | 322.6063 | 506.1538 |
| ENSSSCG00000023611 | 8002.139746 | 1.084846572  | 2.18E-05 | 0.000841 | 13152.04 | 9207.861 | 10270.03 | 6380.584 | 4041.069 | 4961.253 |
| ENSSSCG00000016668 | 98.04696537 | 1.804186961  | 2.28E-05 | 0.000876 | 99.05386 | 213.7296 | 144.5359 | 38.8574  | 46.69302 | 45.41193 |
| ENSSSCG00000022029 | 64.47313944 | 2.455214536  | 2.28E-05 | 0.000876 | 130.7896 | 42.74593 | 153.5071 | 14.94515 | 29.71374 | 15.13731 |
| ENSSSCG00000036441 | 172.0723344 | -1.877153337 | 2.29E-05 | 0.000876 | 41.35258 | 111.7223 | 67.78237 | 180.3382 | 411.7476 | 219.491  |
| ENSSSCG00000005040 | 1112.708037 | -1.306985909 | 2.39E-05 | 0.000914 | 515.4648 | 852.9756 | 553.2238 | 1052.139 | 1695.806 | 2006.64  |
| ENSSSCG00000007239 | 357.3459816 | 1.187757783  | 2.41E-05 | 0.000916 | 523.1583 | 383.7418 | 583.1278 | 204.2504 | 221.7919 | 228.0057 |
| ENSSSCG00000025188 | 143.6382419 | -2.032161385 | 2.46E-05 | 0.000934 | 60.58634 | 73.83387 | 34.88799 | 366.6544 | 99.75328 | 226.1136 |
| ENSSSCG00000034360 | 916.5445496 | 1.631386348  | 2.56E-05 | 0.00097  | 664.5264 | 2099.408 | 1393.526 | 635.6671 | 317.3003 | 388.8397 |
| ENSSSCG00000010491 | 40.54503735 | 2.703155531  | 2.58E-05 | 0.000977 | 78.85841 | 64.11889 | 67.78237 | 16.93784 | 12.73446 | 2.838246 |
| ENSSSCG00000038757 | 597.2829786 | -1.119642399 | 2.6E-05  | 0.000982 | 390.4453 | 374.9984 | 363.8319 | 799.0675 | 1017.696 | 637.6592 |
| ENSSSCG00000001804 | 307.2728131 | 1.607483385  | 2.68E-05 | 0.001006 | 570.281  | 215.6726 | 602.067  | 154.4332 | 168.7316 | 132.4515 |
| ENSSSCG00000022490 | 13.47642207 | 6.215436323  | 2.69E-05 | 0.00101  | 37.50583 | 19.42997 | 22.92639 | 0.996343 | 0        | 0        |
| ENSSSCG00000006183 | 150.1083479 | -1.63050377  | 2.7E-05  | 0.001012 | 49.04609 | 98.12133 | 72.76637 | 288.9396 | 166.6092 | 225.1675 |
| ENSSSCG00000027826 | 1909.907376 | 1.507569871  | 2.73E-05 | 0.001018 | 2338.825 | 4559.242 | 1579.927 | 1031.215 | 718.4358 | 1231.799 |
| ENSSSCG00000004570 | 7713.317039 | -1.030930818 | 2.75E-05 | 0.001024 | 4092.944 | 6634.362 | 4479.617 | 10239.42 | 10359.48 | 10474.07 |
| ENSSSCG00000005452 | 159.5458992 | -1.562074005 | 2.76E-05 | 0.001026 | 58.66297 | 107.8363 | 75.75677 | 259.0493 | 174.0376 | 281.9324 |
| ENSSSCG00000035256 | 201.0523499 | 1.425747457  | 2.8E-05  | 0.001039 | 292.3531 | 238.9886 | 347.8831 | 78.71113 | 109.3041 | 139.074  |
| ENSSSCG00000030415 | 189.9256356 | 1.595855338  | 2.83E-05 | 0.001046 | 326.9739 | 243.8461 | 285.0847 | 77.71479 | 145.3851 | 60.54924 |
| ENSSSCG00000016618 | 6955.745412 | -1.017426405 | 2.84E-05 | 0.001047 | 3600.56  | 5860.078 | 4339.069 | 8844.541 | 9498.847 | 9591.378 |
| ENSSSCG00000032135 | 31.70445641 | 3.627939618  | 2.86E-05 | 0.001053 | 52.89284 | 23.31596 | 99.67996 | 7.970748 | 6.36723  | 0        |
| ENSSSCG00000014347 | 18.33585092 | 4.375319165  | 2.91E-05 | 0.001067 | 39.42921 | 12.62948 | 52.83038 | 0.996343 | 3.183615 | 0.946082 |
| ENSSSCG00000032407 | 18.99986704 | 4.772953489  | 3.08E-05 | 0.001126 | 39.42921 | 9.714984 | 60.80478 | 2.98903  | 1.061205 | 0        |
| ENSSSCG00000009474 | 9.283193986 | 6.657079543  | 3.12E-05 | 0.001133 | 15.38701 | 21.37296 | 18.93919 | 0        | 0        | 0        |
| ENSSSCG00000010283 | 1547.489467 | 1.209564328  | 3.15E-05 | 0.001143 | 2776.393 | 1460.162 | 2245.79  | 942.5409 | 741.7823 | 1118.269 |
| ENSSSCG00000006979 | 438.9563911 | 1.88756793   | 3.2E-05  | 0.001158 | 827.0517 | 931.6669 | 314.9887 | 177.3491 | 82.774   | 299.908  |
| ENSSSCG00000032401 | 31.79508036 | -2.911575653 | 3.22E-05 | 0.00116  | 9.61688  | 9.714984 | 2.990399 | 54.79889 | 79.59038 | 34.05895 |
| ENSSSCG00000008240 | 337.0608019 | 1.493645072  | 3.31E-05 | 0.001192 | 511.618  | 348.7679 | 631.971  | 259.0493 | 151.7523 | 119.2063 |
| ENSSSCG00000035736 | 679.0246277 | 1.449094112  | 3.33E-05 | 0.001193 | 762.6186 | 933.6099 | 1285.872 | 565.9231 | 245.1384 | 280.9863 |
| ENSSSCG00000021601 | 619.2054863 | -1.190686153 | 3.37E-05 | 0.001205 | 309.6635 | 510.0366 | 311.9983 | 771.1698 | 991.1655 | 821.1991 |
| ENSSSCG00000032116 | 300.6565285 | 1.292411971  | 3.39E-05 | 0.001208 | 521.2349 | 301.1645 | 458.5278 | 148.4552 | 191.0169 | 183.5399 |
| ENSSSCG00000006013 | 62.55050179 | 2.018036737  | 3.44E-05 | 0.001224 | 90.39867 | 107.8363 | 102.6704 | 13.94881 | 33.95856 | 26.49029 |

|                    |             |              |          |          |          |          |          |          |          |          |
|--------------------|-------------|--------------|----------|----------|----------|----------|----------|----------|----------|----------|
| ENSSSCG0000006037  | 6461.808991 | -1.144667025 | 3.48E-05 | 0.001232 | 3849.637 | 5124.654 | 3100.047 | 8605.419 | 11320.94 | 6770.162 |
| ENSSSCG00000034036 | 29.97165239 | 3.073745179  | 3.48E-05 | 0.001232 | 61.54803 | 20.40147 | 78.74717 | 6.974404 | 7.428436 | 4.73041  |
| ENSSSCG00000031022 | 9.386639879 | -6.708479879 | 3.49E-05 | 0.001233 | 0        | 0        | 0        | 26.90127 | 9.550846 | 19.86772 |
| ENSSSCG00000032380 | 111.6356138 | 1.98748472   | 3.61E-05 | 0.001271 | 136.5597 | 89.37785 | 309.0079 | 45.8318  | 44.57061 | 44.46585 |
| ENSSSCG00000000362 | 1516.516118 | 1.815579794  | 3.71E-05 | 0.001301 | 1182.876 | 1483.478 | 4419.809 | 374.6251 | 703.579  | 934.7289 |
| ENSSSCG00000009085 | 280.5939205 | -1.230036436 | 3.78E-05 | 0.001321 | 134.6363 | 199.1572 | 169.4559 | 329.7897 | 401.1355 | 449.3889 |
| ENSSSCG00000012927 | 840.3880813 | 1.394338032  | 3.83E-05 | 0.001331 | 845.3237 | 1358.155 | 1449.347 | 262.0383 | 529.5413 | 597.9238 |
| ENSSSCG00000031524 | 10.82954852 | -6.912842379 | 3.82E-05 | 0.001331 | 0        | 0        | 0        | 39.85374 | 22.28531 | 2.838246 |
| ENSSSCG00000021576 | 303.0779916 | 1.277026774  | 3.92E-05 | 0.001357 | 395.2538 | 375.9699 | 516.3422 | 200.265  | 126.2834 | 204.3537 |
| ENSSSCG00000014048 | 262.2152945 | 1.497703973  | 3.98E-05 | 0.001374 | 501.0394 | 297.2785 | 363.8319 | 158.4186 | 79.59038 | 173.133  |
| ENSSSCG00000011713 | 331.6001327 | 1.556479473  | 4.08E-05 | 0.001406 | 583.7446 | 646.0464 | 255.1807 | 185.3199 | 117.7938 | 201.5154 |
| ENSSSCG00000031306 | 26.39867506 | 4.71566713   | 4.19E-05 | 0.001438 | 72.1266  | 5.82899  | 74.75997 | 0        | 0        | 5.676491 |
| ENSSSCG00000006425 | 39.49064033 | -2.882451676 | 4.25E-05 | 0.001456 | 3.846752 | 17.48697 | 6.977597 | 93.65629 | 30.77495 | 84.20129 |
| ENSSSCG00000007927 | 2018.844634 | 1.404390848  | 4.3E-05  | 0.001468 | 4405.493 | 2791.115 | 1594.879 | 1210.557 | 1293.609 | 817.4148 |
| ENSSSCG00000017152 | 772.6200368 | 1.281907963  | 4.39E-05 | 0.001494 | 1293.47  | 652.8469 | 1338.702 | 413.4825 | 397.9519 | 539.2667 |
| ENSSSCG00000001695 | 1949.681144 | -1.050790983 | 4.4E-05  | 0.001495 | 1030.93  | 1471.82  | 1305.807 | 2252.733 | 2346.324 | 3290.473 |
| ENSSSCG00000034266 | 530.399604  | 1.108042765  | 4.47E-05 | 0.001506 | 687.6069 | 571.241  | 915.062  | 351.7092 | 333.2184 | 323.56   |
| ENSSSCG00000034702 | 299.1291827 | 1.130188674  | 4.47E-05 | 0.001506 | 349.0927 | 427.4593 | 455.5374 | 188.3089 | 171.9152 | 202.4615 |
| ENSSSCG00000013916 | 106.4764561 | -2.472976088 | 4.53E-05 | 0.001523 | 19.23376 | 55.37541 | 22.92639 | 266.0237 | 43.50941 | 231.7901 |
| ENSSSCG00000037360 | 8255.22758  | 1.015629494  | 4.56E-05 | 0.00153  | 9797.677 | 13802.08 | 9540.369 | 6314.825 | 4462.367 | 5614.05  |
| ENSSSCG00000001887 | 212.030332  | 1.438321858  | 4.63E-05 | 0.001547 | 415.4492 | 289.5065 | 224.2799 | 146.4625 | 101.8757 | 94.60819 |
| ENSSSCG00000017605 | 8982.804619 | -1.143690745 | 4.63E-05 | 0.001547 | 4840.176 | 8027.491 | 3925.397 | 11695.08 | 12721.73 | 12686.96 |
| ENSSSCG00000025447 | 546.3569389 | 1.183690799  | 4.64E-05 | 0.001548 | 994.3854 | 545.9821 | 735.6381 | 307.8701 | 373.5442 | 320.7218 |
| ENSSSCG00000026945 | 122.6270376 | -1.790587097 | 4.84E-05 | 0.001606 | 31.7357  | 90.34935 | 42.86238 | 165.393  | 231.3427 | 174.0791 |
| ENSSSCG00000034980 | 202.6129422 | 1.720494052  | 4.83E-05 | 0.001606 | 390.4453 | 234.1311 | 308.0111 | 156.4259 | 77.46797 | 49.19626 |
| ENSSSCG00000031147 | 3975.333399 | -1.128856143 | 4.87E-05 | 0.001614 | 2133.024 | 3378.871 | 1972.666 | 4713.701 | 4874.115 | 6779.623 |
| ENSSSCG00000039745 | 792.1300064 | 1.325697015  | 4.99E-05 | 0.001649 | 1386.754 | 823.8306 | 1187.188 | 438.3911 | 286.5254 | 630.0905 |
| ENSSSCG00000017498 | 7302.605801 | -1.005780381 | 5.05E-05 | 0.001666 | 4916.149 | 3672.264 | 5977.807 | 9128.499 | 11081.1  | 9039.813 |
| ENSSSCG00000007644 | 27.48385331 | 3.022802012  | 5.08E-05 | 0.001672 | 72.1266  | 41.77443 | 32.89439 | 9.963435 | 5.306025 | 2.838246 |
| ENSSSCG00000024736 | 329.4621592 | 1.578677249  | 5.1E-05  | 0.001676 | 590.4764 | 219.5586 | 670.8461 | 152.4406 | 192.0781 | 151.3731 |
| ENSSSCG00000004823 | 1232.146733 | 1.112249507  | 5.16E-05 | 0.001692 | 2035.893 | 1329.981 | 1688.579 | 902.6872 | 859.5761 | 576.1639 |
| ENSSSCG00000006777 | 213.9661984 | 2.004027797  | 5.21E-05 | 0.001696 | 428.9128 | 89.37785 | 509.3646 | 95.64897 | 75.34556 | 85.14737 |
| ENSSSCG00000024299 | 75.89905202 | -1.876111714 | 5.21E-05 | 0.001696 | 25.96558 | 48.57492 | 22.92639 | 93.65629 | 133.7118 | 130.5593 |
| ENSSSCG00000008903 | 186.3856041 | 1.637890944  | 5.24E-05 | 0.001701 | 206.7629 | 280.763  | 358.8479 | 143.4735 | 67.91713 | 60.54924 |
| ENSSSCG00000030167 | 817.0509215 | 1.696889675  | 5.26E-05 | 0.001703 | 1667.567 | 389.5708 | 1689.575 | 408.5008 | 345.9529 | 401.1387 |

|                     |             |              |          |          |          |          |          |          |          |          |
|---------------------|-------------|--------------|----------|----------|----------|----------|----------|----------|----------|----------|
| ENSSSCG00000009589  | 200.6697987 | 1.334598564  | 5.37E-05 | 0.001735 | 295.2382 | 352.6539 | 214.3119 | 96.64532 | 114.6101 | 130.5593 |
| ENSSSCG00000005930  | 159.4066215 | 1.443366303  | 5.42E-05 | 0.00175  | 276.9661 | 166.1262 | 256.1775 | 104.6161 | 80.65159 | 71.90222 |
| ENSSSCG00000036208  | 304.3734899 | -1.265404391 | 5.45E-05 | 0.001753 | 174.0655 | 204.9862 | 157.4943 | 309.8628 | 424.482  | 555.3501 |
| ENSSSCG00000011925  | 296.0663636 | 1.910917544  | 5.56E-05 | 0.001786 | 415.4492 | 755.8257 | 232.2543 | 136.4991 | 50.93784 | 185.4321 |
| ENSSSCG00000038706  | 2866.763035 | 1.313755096  | 5.62E-05 | 0.0018   | 4325.672 | 5274.265 | 2666.439 | 2285.612 | 1068.634 | 1579.957 |
| ENSSSCG00000031866  | 42165.39091 | 1.160524276  | 5.76E-05 | 0.001842 | 83723.59 | 45181.47 | 45891.66 | 22272.26 | 31609.05 | 24314.3  |
| ENSSSCG00000008196  | 42.76890071 | 2.261691891  | 5.8E-05  | 0.00185  | 67.31816 | 61.2044  | 83.73117 | 19.92687 | 15.91808 | 8.514737 |
| ENSSSCG00000015023  | 1933.338751 | -1.110454975 | 5.82E-05 | 0.001852 | 1029.006 | 1628.231 | 1014.742 | 2321.48  | 2329.345 | 3277.228 |
| ENSSSCG00000040795  | 17.58891269 | -4.0874449   | 5.84E-05 | 0.001857 | 2.885064 | 0        | 2.990399 | 44.83546 | 16.97928 | 37.84328 |
| ENSSSCG00000024399  | 372.6197204 | -1.04246719  | 5.9E-05  | 0.001872 | 212.533  | 273.9625 | 244.2159 | 487.212  | 504.0724 | 513.7225 |
| ENSSSCG00000014143  | 10.04027992 | 6.77057918   | 5.93E-05 | 0.001877 | 11.54026 | 43.71743 | 4.983998 | 0        | 0        | 0        |
| ENSSSCG00000015085  | 567.9553634 | 1.07737906   | 5.98E-05 | 0.001885 | 822.2432 | 773.3127 | 716.6989 | 448.3546 | 279.0969 | 368.0259 |
| ENSSSCG00000025858  | 4655.640254 | -1.431332503 | 5.99E-05 | 0.001885 | 1836.824 | 1700.122 | 4019.096 | 9765.162 | 5533.123 | 5079.514 |
| ENSSSCG00000028355  | 17105.39303 | 1.006000319  | 6.16E-05 | 0.001929 | 25327.98 | 21262.21 | 21926.6  | 11914.28 | 8220.095 | 13981.2  |
| ENSSSCG00000040728  | 32.92372561 | -3.643341144 | 6.15E-05 | 0.001929 | 0        | 12.62948 | 1.993599 | 28.89396 | 102.9369 | 51.08842 |
| ENSSSCG00000004752  | 86.61653319 | -1.625227134 | 6.26E-05 | 0.001952 | 40.39089 | 32.05945 | 54.82398 | 132.5137 | 128.4058 | 131.5054 |
| ENSSSCG00000040977  | 550.3530763 | 1.133580102  | 6.26E-05 | 0.001952 | 935.7224 | 538.2101 | 794.4493 | 351.7092 | 313.0555 | 368.9719 |
| ENSSSCG00000005657  | 327.9488819 | 1.45590508   | 6.33E-05 | 0.001971 | 533.7368 | 264.2476 | 643.9326 | 203.2541 | 191.0169 | 131.5054 |
| ENSSSCG000000035420 | 470.7406982 | 1.449976181  | 6.36E-05 | 0.001974 | 959.7646 | 534.3241 | 573.1598 | 257.0566 | 354.4425 | 145.6966 |
| ENSSSCG000000035537 | 316.3320834 | 1.277329797  | 6.39E-05 | 0.001979 | 481.8057 | 516.8371 | 344.8927 | 241.1151 | 176.16   | 137.1819 |
| ENSSSCG00000002907  | 1265.142867 | 1.484083823  | 6.45E-05 | 0.001987 | 2511.929 | 775.2557 | 2304.601 | 571.9012 | 798.0262 | 629.1445 |
| ENSSSCG00000003729  | 6336.518931 | -1.024473348 | 6.47E-05 | 0.001987 | 3085.095 | 5341.298 | 4103.824 | 7708.709 | 8202.054 | 9578.133 |
| ENSSSCG00000015821  | 10.14591583 | 6.786009412  | 6.45E-05 | 0.001987 | 47.12271 | 7.771987 | 5.980798 | 0        | 0        | 0        |
| ENSSSCG00000017181  | 1570.904288 | 1.209015861  | 6.46E-05 | 0.001987 | 2393.641 | 1691.379 | 2493.993 | 727.3307 | 1367.893 | 751.189  |
| ENSSSCG00000006890  | 358.7459123 | 1.957169847  | 6.58E-05 | 0.00202  | 563.5492 | 166.1262 | 981.8476 | 169.3784 | 183.5885 | 87.98562 |
| ENSSSCG00000017106  | 602.5236065 | 1.294932245  | 6.64E-05 | 0.002033 | 980.9217 | 476.0342 | 1111.432 | 365.6581 | 348.0753 | 333.0208 |
| ENSSSCG00000004454  | 18815.05903 | 1.015074746  | 6.67E-05 | 0.002038 | 24230.69 | 22941.93 | 28348.98 | 9549.952 | 16292.68 | 11526.12 |
| ENSSSCG00000007857  | 126.6340412 | -1.40028361  | 6.69E-05 | 0.002039 | 69.24153 | 80.63436 | 58.81118 | 188.3089 | 204.8126 | 157.9957 |
| ENSSSCG000000039962 | 1577.703563 | 1.085054509  | 6.74E-05 | 0.002051 | 2021.468 | 1716.638 | 2695.346 | 787.1113 | 1235.243 | 1010.415 |
| ENSSSCG00000015050  | 645.7514541 | -1.003819081 | 6.84E-05 | 0.002078 | 423.1427 | 505.1791 | 360.8415 | 954.497  | 826.6788 | 804.1696 |
| ENSSSCG000000036013 | 153.1598395 | -5.950127409 | 6.9E-05  | 0.002088 | 0        | 12.62948 | 1.993599 | 131.5173 | 644.1515 | 128.6671 |
| ENSSSCG00000003983  | 777.0083753 | 1.041910182  | 7E-05    | 0.002112 | 1307.896 | 994.8143 | 835.3181 | 551.9743 | 457.3794 | 514.6686 |
| ENSSSCG00000001597  | 13.74816109 | 6.24563097   | 7.09E-05 | 0.002136 | 55.7779  | 5.82899  | 19.93599 | 0        | 0        | 0.946082 |
| ENSSSCG00000017980  | 27.99195499 | -2.848968964 | 7.16E-05 | 0.002151 | 10.57857 | 2.914495 | 6.977597 | 37.86105 | 42.4482  | 67.17181 |
| ENSSSCG00000006717  | 660.3442561 | -1.604296764 | 7.26E-05 | 0.002173 | 444.2998 | 194.2997 | 341.9023 | 1406.837 | 1129.122 | 445.6046 |

|                    |             |              |          |          |          |          |          |          |          |          |
|--------------------|-------------|--------------|----------|----------|----------|----------|----------|----------|----------|----------|
| ENSSSCG00000013073 | 595.8352208 | 1.534118168  | 7.37E-05 | 0.002197 | 1051.125 | 360.4259 | 1246     | 287.9433 | 273.7909 | 355.7268 |
| ENSSSCG00000013114 | 400.8666212 | 1.634230229  | 7.37E-05 | 0.002197 | 849.1705 | 480.8917 | 489.4286 | 243.1078 | 79.59038 | 263.0108 |
| ENSSSCG00000030395 | 768.5429301 | -1.110573766 | 7.52E-05 | 0.002234 | 356.7862 | 636.3314 | 466.5022 | 913.647  | 1068.634 | 1169.357 |
| ENSSSCG00000008579 | 39.88250584 | 2.304310767  | 7.6E-05  | 0.002252 | 50.96946 | 60.2329  | 87.71837 | 15.9415  | 15.91808 | 8.514737 |
| ENSSSCG00000024660 | 337.7579777 | -1.427877333 | 7.61E-05 | 0.002252 | 153.8701 | 287.5635 | 107.6544 | 507.1388 | 441.4613 | 528.8598 |
| ENSSSCG00000024814 | 522.3208042 | 1.098578305  | 7.71E-05 | 0.002276 | 697.2238 | 711.1368 | 727.6637 | 258.053  | 436.1553 | 303.6923 |
| ENSSSCG00000014921 | 3550.819854 | 1.023618801  | 7.77E-05 | 0.002289 | 6358.681 | 3925.825 | 3996.17  | 2430.082 | 2084.207 | 2509.955 |
| ENSSSCG00000030767 | 46.34786321 | 3.172781699  | 7.78E-05 | 0.002289 | 85.59023 | 34.97394 | 129.5839 | 10.95978 | 16.97928 | 0        |
| ENSSSCG00000014051 | 182.1447032 | 1.369329518  | 7.89E-05 | 0.002316 | 269.2726 | 229.2736 | 289.0719 | 83.69285 | 141.1403 | 80.41696 |
| ENSSSCG00000004547 | 1311.54907  | 1.065044128  | 8.27E-05 | 0.002417 | 2375.369 | 1324.152 | 1624.783 | 836.9285 | 910.514  | 797.547  |
| ENSSSCG00000011443 | 2059.824789 | 1.002006393  | 8.44E-05 | 0.002461 | 2934.11  | 2971.813 | 2337.495 | 1547.321 | 1016.634 | 1551.574 |
| ENSSSCG00000036203 | 24.47435008 | -3.072247858 | 8.54E-05 | 0.002488 | 7.693504 | 2.914495 | 4.983998 | 69.74404 | 35.01977 | 26.49029 |
| ENSSSCG00000022679 | 63.97930976 | -2.958444619 | 8.65E-05 | 0.002514 | 15.38701 | 20.40147 | 7.974397 | 21.91956 | 55.18266 | 263.0108 |
| ENSSSCG00000016298 | 439.9246015 | 1.149286043  | 8.76E-05 | 0.002541 | 634.7141 | 711.1368 | 473.4798 | 345.7312 | 231.3427 | 243.143  |
| ENSSSCG00000023716 | 303.6225603 | -1.652675231 | 9.01E-05 | 0.00261  | 74.04997 | 237.0456 | 128.5872 | 461.307  | 289.709  | 631.0366 |
| ENSSSCG00000039332 | 114.1063258 | 1.633677608  | 9.12E-05 | 0.002636 | 129.8279 | 256.4756 | 131.5775 | 56.79158 | 45.63182 | 64.33357 |
| ENSSSCG00000040101 | 226.9052991 | 1.283411764  | 9.18E-05 | 0.002647 | 336.5908 | 247.7321 | 380.7775 | 166.3894 | 105.0593 | 124.8828 |
| ENSSSCG00000025618 | 881.6471346 | 1.008043509  | 9.22E-05 | 0.002649 | 1349.248 | 888.921  | 1294.843 | 594.8171 | 630.3558 | 531.698  |
| ENSSSCG00000014570 | 2069.605922 | -1.252520791 | 9.64E-05 | 0.002759 | 1080.937 | 1826.417 | 763.5485 | 3182.321 | 3309.899 | 2254.513 |
| ENSSSCG00000033512 | 3085.847719 | 1.212445979  | 0.000101 | 0.002876 | 4855.563 | 5075.107 | 3003.357 | 2225.831 | 1137.612 | 2217.616 |
| ENSSSCG00000008072 | 4182.120466 | -1.425620919 | 0.000101 | 0.002881 | 1148.255 | 3558.598 | 2100.257 | 7806.351 | 4085.64  | 6393.621 |
| ENSSSCG00000036383 | 412.34275   | 1.444854041  | 0.000102 | 0.002883 | 919.3737 | 377.9129 | 512.355  | 202.2577 | 161.3032 | 300.854  |
| ENSSSCG00000033375 | 40.16040595 | -2.753876469 | 0.000102 | 0.002888 | 7.693504 | 21.37296 | 1.993599 | 63.76598 | 91.26364 | 54.87275 |
| ENSSSCG00000027070 | 76.19626798 | 1.618470113  | 0.000104 | 0.002931 | 99.05386 | 133.0953 | 112.6384 | 33.87568 | 43.50941 | 35.00503 |
| ENSSSCG00000040931 | 67.43833561 | 2.034036075  | 0.000105 | 0.002971 | 148.0999 | 53.43241 | 123.6032 | 18.93053 | 35.01977 | 25.54421 |
| ENSSSCG00000022250 | 59.07348705 | 1.967684178  | 0.000106 | 0.002991 | 81.74348 | 70.91938 | 129.5839 | 32.87933 | 22.28531 | 17.02947 |
| ENSSSCG00000021374 | 2900.097484 | 1.384846112  | 0.000107 | 0.002997 | 4319.902 | 2151.869 | 6110.382 | 1629.022 | 2103.308 | 1086.102 |
| ENSSSCG00000000025 | 110.2507852 | 1.425992085  | 0.000107 | 0.002998 | 166.372  | 161.2687 | 154.5039 | 74.72576 | 48.81543 | 55.81883 |
| ENSSSCG00000033623 | 221.4043228 | 1.351093062  | 0.000108 | 0.003008 | 401.9856 | 298.25   | 254.1839 | 168.382  | 90.20243 | 115.422  |
| ENSSSCG00000031653 | 29.73045548 | 2.929844962  | 0.000108 | 0.003009 | 81.74348 | 27.20195 | 48.84318 | 2.98903  | 5.306025 | 12.29906 |
| ENSSSCG00000037697 | 7730.16491  | -1.235737375 | 0.000108 | 0.003021 | 3619.794 | 4112.353 | 6092.439 | 14842.53 | 6430.903 | 11282.97 |
| ENSSSCG00000000894 | 51.87695906 | -2.018247394 | 0.000109 | 0.003023 | 12.50194 | 25.25896 | 23.92319 | 86.68188 | 62.6111  | 100.2847 |
| ENSSSCG00000021181 | 514.7065619 | 1.340461516  | 0.000109 | 0.003037 | 434.683  | 649.9324 | 1129.374 | 329.7897 | 283.3418 | 261.1186 |
| ENSSSCG00000001788 | 34.84733445 | 2.43490998   | 0.000112 | 0.00308  | 78.85841 | 37.88844 | 59.80798 | 9.963435 | 7.428436 | 15.13731 |
| ENSSSCG00000007286 | 4659.739805 | 1.399477034  | 0.000112 | 0.003092 | 7658.883 | 3026.217 | 9588.215 | 1981.727 | 3300.348 | 2403.048 |



|                     |             |              |          |          |          |          |          |          |          |          |
|---------------------|-------------|--------------|----------|----------|----------|----------|----------|----------|----------|----------|
| ENSSSCG00000011717  | 49.49144712 | -1.964173571 | 0.000113 | 0.003101 | 22.11882 | 14.57248 | 23.92319 | 70.74039 | 70.03954 | 95.55427 |
| ENSSSCG00000015299  | 302.5472418 | -1.23149119  | 0.000113 | 0.003101 | 169.2571 | 192.3567 | 180.4207 | 354.6983 | 592.1524 | 326.3983 |
| ENSSSCG00000010559  | 46.4045594  | 2.432187974  | 0.000115 | 0.003154 | 115.4026 | 38.85993 | 80.74077 | 21.91956 | 6.36723  | 15.13731 |
| ENSSSCG00000007287  | 613.7063605 | 1.050993069  | 0.000116 | 0.003163 | 881.8679 | 621.7589 | 979.854  | 438.3911 | 415.9924 | 344.3738 |
| ENSSSCG000000038954 | 502.4817885 | 1.127807816  | 0.000116 | 0.003163 | 672.2199 | 512.9511 | 883.1645 | 367.6507 | 313.0555 | 265.849  |
| ENSSSCG00000004039  | 337.8714569 | -1.381183566 | 0.000117 | 0.003167 | 163.487  | 265.219  | 133.5711 | 659.5794 | 473.2975 | 332.0747 |
| ENSSSCG00000021933  | 9.047267303 | 6.620502186  | 0.000117 | 0.003167 | 19.23376 | 32.05945 | 2.990399 | 0        | 0        | 0        |
| ENSSSCG000000031336 | 98.45495633 | 2.507824518  | 0.000118 | 0.003177 | 82.70517 | 102.9788 | 316.9823 | 13.94881 | 11.67326 | 62.44141 |
| ENSSSCG00000007980  | 277.6983187 | 1.346381148  | 0.000118 | 0.003183 | 552.0089 | 278.82   | 364.8287 | 174.3601 | 183.5885 | 112.5837 |
| ENSSSCG00000006648  | 2559.20481  | 1.089859603  | 0.000119 | 0.003206 | 4600.715 | 3548.883 | 2297.623 | 1638.985 | 1415.648 | 1853.374 |
| ENSSSCG00000040252  | 483.4280427 | -1.035437313 | 0.00012  | 0.003209 | 263.5025 | 387.6278 | 300.0367 | 618.7293 | 597.4585 | 733.2135 |
| ENSSSCG00000001068  | 147.3266687 | -1.650670964 | 0.000122 | 0.003269 | 38.46752 | 87.43485 | 87.71837 | 311.8555 | 147.5075 | 210.9763 |
| ENSSSCG00000008745  | 881.4552119 | -1.178455601 | 0.000122 | 0.003274 | 529.8901 | 560.5545 | 530.2974 | 753.2357 | 1202.345 | 1712.408 |
| ENSSSCG00000030597  | 680.542125  | 1.577154479  | 0.000124 | 0.003292 | 988.6152 | 534.3241 | 1535.071 | 382.5959 | 473.2975 | 169.3487 |
| ENSSSCG000000032452 | 2323.339829 | 3.329099941  | 0.000124 | 0.003292 | 5062.325 | 665.4764 | 6950.684 | 314.8445 | 467.9914 | 478.7174 |
| ENSSSCG000000034356 | 7.99955486  | -6.474986169 | 0.000125 | 0.003305 | 0        | 0        | 0        | 12.95247 | 26.53013 | 8.514737 |
| ENSSSCG000000032936 | 875.9616047 | 1.542162469  | 0.000127 | 0.003352 | 1975.307 | 490.6067 | 1446.356 | 354.6983 | 550.7654 | 438.0359 |
| ENSSSCG00000040498  | 16.35721388 | 3.962730658  | 0.000127 | 0.003352 | 27.88895 | 14.57248 | 49.83998 | 0.996343 | 1.061205 | 3.784328 |
| ENSSSCG000000033849 | 312.3020592 | 1.35218306   | 0.000128 | 0.003371 | 626.0589 | 324.4804 | 395.7294 | 228.1627 | 178.2825 | 121.0985 |
| ENSSSCG000000012893 | 625.0813163 | 1.345405763  | 0.000131 | 0.003435 | 775.1205 | 664.5049 | 1251.98  | 478.2449 | 206.935  | 373.7024 |
| ENSSSCG00000027967  | 117.3579138 | 1.434915801  | 0.000132 | 0.003435 | 203.8778 | 188.4707 | 121.6096 | 60.77695 | 67.91713 | 61.49532 |
| ENSSSCG000000036984 | 261.8718785 | -1.636956592 | 0.000131 | 0.003435 | 105.7857 | 218.5871 | 57.81438 | 308.8665 | 491.338  | 388.8397 |
| ENSSSCG000000039548 | 619.2104535 | -1.454838029 | 0.000132 | 0.003435 | 377.9434 | 268.1335 | 346.8863 | 1339.086 | 985.8595 | 397.3544 |
| ENSSSCG00000002814  | 40.08542863 | 2.610159443  | 0.000133 | 0.003456 | 111.5558 | 21.37296 | 73.76317 | 9.963435 | 10.61205 | 13.24515 |
| ENSSSCG00000027121  | 393.2816498 | 1.031770105  | 0.000133 | 0.003469 | 594.3232 | 438.1458 | 552.227  | 290.9323 | 232.4039 | 251.6578 |
| ENSSSCG00000007157  | 126.3245998 | 1.771121685  | 0.000135 | 0.00349  | 195.2227 | 115.6083 | 275.1167 | 43.83911 | 91.26364 | 36.89719 |
| ENSSSCG000000015603 | 8177.136976 | -1.290553375 | 0.000136 | 0.003527 | 3477.464 | 7668.036 | 3091.076 | 12135.46 | 13857.22 | 8833.567 |
| ENSSSCG000000012121 | 46.65554564 | -3.034948392 | 0.000137 | 0.003531 | 0        | 15.54397 | 14.95199 | 84.68919 | 36.08097 | 128.6671 |
| ENSSSCG000000011806 | 179.3449131 | 2.214023189  | 0.000137 | 0.003531 | 277.9278 | 488.6637 | 118.6192 | 126.5356 | 43.50941 | 20.8138  |
| ENSSSCG000000010394 | 71.11903379 | -1.655990297 | 0.000138 | 0.003549 | 28.85064 | 29.14495 | 44.85598 | 112.5868 | 98.69207 | 112.5837 |
| ENSSSCG00000004897  | 1796.565058 | -1.055286565 | 0.000141 | 0.003613 | 890.5231 | 1416.445 | 1195.163 | 2452.998 | 1815.722 | 3008.54  |
| ENSSSCG00000000867  | 47.77410384 | -2.759101601 | 0.000143 | 0.003672 | 11.54026 | 23.31596 | 1.993599 | 144.4698 | 55.18266 | 50.14234 |
| ENSSSCG000000036785 | 97.53061226 | 1.937199275  | 0.000144 | 0.003682 | 194.261  | 96.17834 | 173.4431 | 62.76964 | 42.4482  | 16.08339 |
| ENSSSCG000000034364 | 167.9210837 | 1.413155365  | 0.000144 | 0.00369  | 358.7096 | 191.3852 | 182.4143 | 90.66726 | 85.95761 | 98.39252 |
| ENSSSCG000000031493 | 396.4102097 | 1.539072839  | 0.000146 | 0.00373  | 992.462  | 352.6539 | 424.6366 | 189.3053 | 142.2015 | 277.202  |

|                    |             |              |          |          |          |          |          |          |          |          |
|--------------------|-------------|--------------|----------|----------|----------|----------|----------|----------|----------|----------|
| ENSSSCG00000033246 | 102.8057387 | 2.35463856   | 0.000148 | 0.003754 | 214.4564 | 54.40391 | 247.2063 | 61.7733  | 10.61205 | 28.38246 |
| ENSSSCG00000022295 | 293.0853023 | 1.893849738  | 0.000148 | 0.003765 | 578.9362 | 102.9788 | 703.7405 | 126.5356 | 125.2222 | 121.0985 |
| ENSSSCG00000008767 | 220.7621882 | 2.008342852  | 0.000149 | 0.00378  | 661.6413 | 93.26384 | 306.0175 | 119.5612 | 63.6723  | 80.41696 |
| ENSSSCG00000015999 | 473.9462879 | -1.066307512 | 0.00015  | 0.003786 | 221.1882 | 376.9414 | 320.9695 | 673.5282 | 648.3963 | 602.6542 |
| ENSSSCG00000013492 | 156.4812106 | 1.441898554  | 0.000151 | 0.003808 | 294.2765 | 149.6107 | 242.2223 | 70.74039 | 108.2429 | 73.79439 |
| ENSSSCG00000005149 | 23.09055978 | -3.076562562 | 0.000152 | 0.003826 | 0.961688 | 8.743485 | 4.983998 | 38.8574  | 50.93784 | 34.05895 |
| ENSSSCG00000009662 | 107.1330261 | -1.926556935 | 0.000156 | 0.003915 | 40.39089 | 43.71743 | 49.83998 | 68.7477  | 141.1403 | 298.9619 |
| ENSSSCG00000010142 | 942.1067179 | 1.155317334  | 0.000156 | 0.003915 | 1706.996 | 1167.741 | 1026.704 | 491.1973 | 460.563  | 799.4392 |
| ENSSSCG00000009693 | 58.57743844 | -1.996537433 | 0.000158 | 0.003921 | 24.0422  | 15.54397 | 30.90079 | 58.78426 | 85.95761 | 136.2358 |
| ENSSSCG00000016577 | 591.2143047 | 1.126088808  | 0.000157 | 0.003921 | 927.0672 | 514.8941 | 990.8188 | 361.6727 | 363.9933 | 388.8397 |
| ENSSSCG00000017894 | 318.5084515 | 1.592023099  | 0.000158 | 0.003921 | 783.7757 | 223.4446 | 427.627  | 124.5429 | 215.4246 | 136.2358 |
| ENSSSCG00000038322 | 1797.640545 | 2.92793355   | 0.000157 | 0.003921 | 4593.983 | 1027.845 | 3911.442 | 210.2285 | 320.4839 | 721.8605 |
| ENSSSCG00000038933 | 431.0041573 | -1.372295248 | 0.000159 | 0.003942 | 162.5253 | 391.5138 | 166.4655 | 694.4514 | 661.1308 | 509.9381 |
| ENSSSCG00000031091 | 42.13952452 | -2.876412215 | 0.000163 | 0.004033 | 0.961688 | 20.40147 | 8.971197 | 66.75501 | 40.32579 | 115.422  |
| ENSSSCG00000034367 | 64.3352305  | 2.388446414  | 0.000166 | 0.004106 | 167.3337 | 27.20195 | 129.5839 | 29.8903  | 15.91808 | 16.08339 |
| ENSSSCG00000017126 | 331.0485794 | 1.16415381   | 0.000169 | 0.004171 | 556.8173 | 380.8274 | 435.6014 | 249.0859 | 215.4246 | 148.5349 |
| ENSSSCG00000032436 | 418.1336889 | 1.422793534  | 0.000171 | 0.004196 | 750.1166 | 280.763  | 796.4429 | 181.3345 | 232.4039 | 267.7412 |
| ENSSSCG00000036206 | 838.3635065 | -1.285474693 | 0.000171 | 0.004196 | 450.07   | 711.1368 | 302.0303 | 1597.139 | 898.8407 | 1070.965 |
| ENSSSCG00000030113 | 73.68914141 | -2.953082081 | 0.000173 | 0.004234 | 6.731816 | 39.83143 | 3.987198 | 253.0712 | 29.71374 | 108.7994 |
| ENSSSCG00000015334 | 17426.76258 | -1.611346359 | 0.000176 | 0.004283 | 3177.417 | 14025.52 | 8580.451 | 27138.4  | 14369.78 | 37269    |
| ENSSSCG00000025005 | 225.6241469 | -1.512383641 | 0.000176 | 0.004296 | 76.93504 | 181.6702 | 92.70236 | 217.2029 | 444.6449 | 340.5895 |
| ENSSSCG00000026079 | 17.48082949 | -3.278308623 | 0.000177 | 0.004306 | 1.923376 | 2.914495 | 4.983998 | 22.9159  | 37.14218 | 35.00503 |
| ENSSSCG00000014443 | 47.75124701 | -2.70604425  | 0.000178 | 0.004324 | 17.31038 | 6.800488 | 13.95519 | 15.9415  | 119.9162 | 112.5837 |
| ENSSSCG00000007944 | 342.6355183 | 1.278903215  | 0.000179 | 0.004336 | 653.9478 | 322.5375 | 479.4606 | 256.0603 | 151.7523 | 192.0546 |
| ENSSSCG00000038644 | 363.3187902 | -1.303689357 | 0.00018  | 0.004347 | 246.1921 | 178.7557 | 203.3471 | 533.0438 | 720.5582 | 298.0158 |
| ENSSSCG00000012426 | 143.8945282 | -1.337191778 | 0.000182 | 0.004396 | 75.97335 | 103.9503 | 64.79197 | 200.265  | 246.1996 | 172.1869 |
| ENSSSCG00000022289 | 1450.504172 | 1.300406709  | 0.000186 | 0.004493 | 2789.857 | 961.7834 | 2438.172 | 715.3746 | 944.4725 | 853.3659 |
| ENSSSCG00000020706 | 183.9956227 | -1.147114739 | 0.000187 | 0.004494 | 109.6324 | 134.0668 | 99.67996 | 253.0712 | 256.8116 | 250.7117 |
| ENSSSCG00000016685 | 168.9148114 | -1.225051937 | 0.000189 | 0.004519 | 99.05386 | 101.0358 | 103.6672 | 253.0712 | 180.4049 | 276.2559 |
| ENSSSCG00000022500 | 94.36263009 | -1.907329048 | 0.000189 | 0.004519 | 57.70128 | 13.60098 | 47.84638 | 109.5978 | 188.8945 | 148.5349 |
| ENSSSCG00000012347 | 110.7885316 | 1.838988015  | 0.000191 | 0.004554 | 242.3454 | 102.9788 | 174.4399 | 31.88299 | 30.77495 | 82.30913 |
| ENSSSCG00000021696 | 469.7401839 | -1.38978207  | 0.000194 | 0.004628 | 204.8395 | 246.7606 | 326.9503 | 1107.934 | 497.7052 | 434.2516 |
| ENSSSCG00000039838 | 146.3060403 | 1.446724133  | 0.000196 | 0.004668 | 274.0811 | 174.8697 | 193.3791 | 109.5978 | 53.06025 | 72.84831 |
| ENSSSCG00000037142 | 470.0096511 | 1.449112763  | 0.000197 | 0.00468  | 1177.106 | 472.1482 | 414.6686 | 280.9689 | 281.2193 | 193.9468 |
| ENSSSCG00000013989 | 34.79515658 | -2.681441598 | 0.000202 | 0.004784 | 12.50194 | 11.65798 | 3.987198 | 60.77695 | 23.34651 | 96.50035 |

|                     |             |              |          |          |          |          |          |          |          |          |
|---------------------|-------------|--------------|----------|----------|----------|----------|----------|----------|----------|----------|
| ENSSSCG00000004215  | 571.0311885 | -1.22916548  | 0.000203 | 0.004789 | 284.6596 | 408.0293 | 331.9343 | 1031.215 | 457.3794 | 912.969  |
| ENSSSCG00000015098  | 43.82589668 | -2.319490251 | 0.000202 | 0.004789 | 20.19545 | 10.68648 | 12.95839 | 98.638   | 90.20243 | 30.27462 |
| ENSSSCG00000003871  | 17.70161373 | 4.290374205  | 0.000204 | 0.004813 | 45.19933 | 42.74593 | 12.95839 | 0        | 5.306025 | 0        |
| ENSSSCG00000001422  | 965.1724547 | 1.05654369   | 0.000208 | 0.004869 | 1506.965 | 1349.411 | 1054.614 | 796.0784 | 442.5225 | 641.4435 |
| ENSSSCG000000017128 | 230.7094715 | 1.19373498   | 0.000208 | 0.004869 | 351.0161 | 222.4731 | 389.7486 | 139.4881 | 135.8343 | 145.6966 |
| ENSSSCG000000037775 | 560.3947554 | 1.223583357  | 0.000208 | 0.004869 | 1029.968 | 635.3599 | 688.7885 | 472.2668 | 309.8719 | 226.1136 |
| ENSSSCG000000037997 | 89.40969208 | -1.853963925 | 0.000208 | 0.004869 | 47.12271 | 27.20195 | 41.86558 | 68.7477  | 222.8531 | 128.6671 |
| ENSSSCG000000040709 | 210.6496699 | 1.682317256  | 0.000207 | 0.004869 | 509.6946 | 140.8673 | 312.9951 | 138.4917 | 96.56966 | 65.27965 |
| ENSSSCG000000006106 | 20.05159932 | -4.049442802 | 0.00021  | 0.004901 | 2.885064 | 0        | 3.987198 | 61.7733  | 5.306025 | 46.35801 |
| ENSSSCG000000006495 | 128.9781123 | 1.293733456  | 0.00021  | 0.004912 | 166.372  | 206.9291 | 176.4335 | 88.67457 | 62.6111  | 72.84831 |
| ENSSSCG000000033760 | 10436.75358 | 1.18955411   | 0.000212 | 0.004953 | 17201.71 | 7286.238 | 19045.85 | 6711.37  | 5717.773 | 6657.578 |
| ENSSSCG000000001567 | 12.23138566 | 5.18371271   | 0.000214 | 0.00498  | 15.38701 | 27.20195 | 28.90719 | 0        | 0        | 1.892164 |
| ENSSSCG000000028674 | 366.2487076 | 4.892349704  | 0.000217 | 0.005053 | 281.7746 | 1755.498 | 88.71517 | 15.9415  | 6.36723  | 49.19626 |
| ENSSSCG000000031976 | 386.5128477 | -1.060113768 | 0.000219 | 0.005075 | 237.5369 | 197.2142 | 316.9823 | 564.9267 | 545.4594 | 456.9576 |
| ENSSSCG000000000136 | 266.8772166 | 1.502928458  | 0.000223 | 0.005171 | 347.1694 | 220.5301 | 616.0222 | 195.2833 | 103.9981 | 118.2602 |
| ENSSSCG000000010067 | 671.5886702 | 1.275187473  | 0.000231 | 0.005338 | 1153.064 | 554.7256 | 1143.329 | 390.5666 | 521.0517 | 266.7951 |
| ENSSSCG000000038886 | 142.1316403 | -1.267247225 | 0.000231 | 0.005338 | 67.31816 | 92.29234 | 90.70876 | 235.1371 | 194.2005 | 173.133  |
| ENSSSCG000000017874 | 707.5968757 | 1.094764957  | 0.000232 | 0.005342 | 1252.118 | 623.7019 | 1015.739 | 479.2412 | 476.4811 | 398.3005 |
| ENSSSCG000000001782 | 64.01109257 | 2.150891229  | 0.000234 | 0.005362 | 176.9506 | 37.88844 | 98.68316 | 18.93053 | 22.28531 | 29.32854 |
| ENSSSCG000000031072 | 373.1993995 | -1.091847258 | 0.000234 | 0.005362 | 208.6863 | 303.1075 | 203.3471 | 469.2778 | 435.0941 | 619.6836 |
| ENSSSCG000000009630 | 19.44369944 | 3.281154938  | 0.000235 | 0.005376 | 50.00777 | 37.88844 | 17.94239 | 5.978061 | 1.061205 | 3.784328 |
| ENSSSCG000000008722 | 124.3355523 | 1.555585869  | 0.000238 | 0.005437 | 242.3454 | 101.0358 | 213.3151 | 77.71479 | 51.99905 | 59.60316 |
| ENSSSCG000000014853 | 213.5488929 | 1.41229411   | 0.000238 | 0.005445 | 356.7862 | 174.8697 | 399.7166 | 153.4369 | 101.8757 | 94.60819 |
| ENSSSCG000000033190 | 3629.287325 | 1.396575635  | 0.000239 | 0.005458 | 7288.633 | 1988.657 | 6504.117 | 2354.36  | 1991.882 | 1648.075 |
| ENSSSCG000000038007 | 185.0166637 | -1.510141472 | 0.000244 | 0.005557 | 44.23765 | 111.7223 | 132.5743 | 213.2175 | 314.1167 | 294.2315 |
| ENSSSCG000000004919 | 690.9824394 | 1.164307073  | 0.000249 | 0.005654 | 1221.344 | 713.0798 | 932.0076 | 438.3911 | 558.1939 | 282.8785 |
| ENSSSCG000000012967 | 37.03948775 | 2.306102809  | 0.000252 | 0.005723 | 94.24542 | 46.63192 | 43.85918 | 12.95247 | 16.97928 | 7.568655 |
| ENSSSCG000000001596 | 270.5394824 | 1.454418139  | 0.000254 | 0.005758 | 495.2693 | 232.1881 | 461.5182 | 104.6161 | 221.7919 | 107.8533 |
| ENSSSCG000000029267 | 140.9707014 | 1.42356072   | 0.000256 | 0.005796 | 222.1499 | 231.2166 | 162.4783 | 59.78061 | 112.4877 | 57.711   |
| ENSSSCG000000007529 | 130.2644423 | 1.915379448  | 0.000261 | 0.005903 | 135.598  | 347.7964 | 134.5679 | 84.68919 | 21.2241  | 57.711   |
| ENSSSCG000000029621 | 27.06416956 | -2.957613662 | 0.000262 | 0.005911 | 1.923376 | 13.60098 | 2.990399 | 29.8903  | 47.75423 | 66.22573 |
| ENSSSCG000000036983 | 142.7673971 | 4.932294854  | 0.000264 | 0.005933 | 191.3759 | 229.2736 | 408.6878 | 4.981717 | 22.28531 | 0        |
| ENSSSCG000000032734 | 226.335276  | 1.259118462  | 0.000267 | 0.005984 | 387.5603 | 219.5586 | 350.8735 | 159.415  | 98.69207 | 141.9123 |
| ENSSSCG000000005601 | 7201.694767 | -1.094555969 | 0.000271 | 0.006071 | 3930.419 | 6031.062 | 3819.736 | 7878.088 | 7579.127 | 13971.74 |
| ENSSSCG000000023788 | 215.5896594 | 1.05815159   | 0.000271 | 0.006071 | 285.6213 | 262.3046 | 325.9535 | 145.4661 | 137.9567 | 136.2358 |

|                    |             |              |          |          |          |          |          |          |          |          |
|--------------------|-------------|--------------|----------|----------|----------|----------|----------|----------|----------|----------|
| ENSSSCG00000008593 | 436.9287905 | 1.002687117  | 0.000272 | 0.006074 | 729.9212 | 497.4072 | 521.3262 | 304.8811 | 308.8107 | 259.2264 |
| ENSSSCG00000013144 | 1085.205388 | 1.209196853  | 0.000272 | 0.006074 | 1297.317 | 2193.643 | 1054.614 | 774.1589 | 430.8493 | 760.6498 |
| ENSSSCG00000000660 | 755.8452902 | 1.279099488  | 0.000286 | 0.006345 | 1418.49  | 666.4479 | 1126.384 | 399.5337 | 635.6618 | 288.555  |
| ENSSSCG00000037106 | 33.59461528 | -2.240694284 | 0.000288 | 0.006359 | 8.655192 | 14.57248 | 11.9616  | 66.75501 | 63.6723  | 35.95111 |
| ENSSSCG00000037424 | 739.6618961 | -1.178969469 | 0.000288 | 0.006359 | 308.7018 | 595.5285 | 455.5374 | 1190.63  | 672.804  | 1214.769 |
| ENSSSCG00000014420 | 178.8034787 | 2.201043369  | 0.00029  | 0.006396 | 337.5525 | 479.9202 | 63.79518 | 21.91956 | 63.6723  | 105.9612 |
| ENSSSCG00000001553 | 20.31986272 | -3.530825678 | 0.000291 | 0.006401 | 3.846752 | 4.857492 | 0.9968   | 23.91224 | 11.67326 | 76.63263 |
| ENSSSCG00000015914 | 319.4202008 | -1.293504892 | 0.000291 | 0.006401 | 112.5175 | 254.5326 | 188.3951 | 474.2595 | 325.79   | 561.0266 |
| ENSSSCG00000003901 | 192.3099577 | -1.379116545 | 0.000292 | 0.006409 | 108.6707 | 57.3184  | 154.5039 | 296.9104 | 270.6073 | 265.849  |
| ENSSSCG00000003278 | 49.87041628 | 2.528536654  | 0.000293 | 0.00642  | 97.13048 | 133.0953 | 24.91999 | 6.974404 | 10.61205 | 26.49029 |
| ENSSSCG00000034313 | 39.59484705 | 3.070229577  | 0.000297 | 0.00649  | 133.6746 | 7.771987 | 70.77277 | 3.985374 | 13.79567 | 7.568655 |
| ENSSSCG00000009216 | 2558.062747 | 2.564798493  | 0.000297 | 0.006499 | 3083.172 | 6406.06  | 3640.312 | 526.0694 | 324.7288 | 1368.034 |
| ENSSSCG00000010352 | 14.00931556 | -4.006883741 | 0.000301 | 0.006572 | 0        | 0.971498 | 3.987198 | 33.87568 | 24.40772 | 20.8138  |
| ENSSSCG00000006821 | 21.96063425 | -2.79426366  | 0.000307 | 0.006675 | 2.885064 | 8.743485 | 4.983998 | 47.82449 | 27.59133 | 39.73544 |
| ENSSSCG00000015412 | 127.003229  | -1.758769799 | 0.000308 | 0.006687 | 32.69739 | 90.34935 | 50.83678 | 119.5612 | 150.6911 | 317.8835 |
| ENSSSCG00000000399 | 46.65846103 | 2.125503682  | 0.000311 | 0.006731 | 65.39478 | 113.6653 | 48.84318 | 14.94515 | 10.61205 | 26.49029 |
| ENSSSCG00000017258 | 202.579673  | 1.74939107   | 0.000316 | 0.006817 | 567.3959 | 244.8176 | 124.6    | 129.5247 | 75.34556 | 73.79439 |
| ENSSSCG00000007849 | 667.2059471 | 1.383479896  | 0.000316 | 0.006821 | 829.9367 | 636.3314 | 1427.417 | 394.552  | 521.0517 | 193.9468 |
| ENSSSCG00000024622 | 359.014655  | -1.269474073 | 0.000325 | 0.006992 | 134.6363 | 323.509  | 173.4431 | 594.8171 | 423.4208 | 504.2617 |
| ENSSSCG00000013596 | 139.0277823 | 1.463514107  | 0.000326 | 0.007011 | 247.1538 | 110.7508 | 254.1839 | 72.73307 | 85.95761 | 63.38749 |
| ENSSSCG00000034058 | 4202.766496 | 1.121036306  | 0.000328 | 0.007054 | 7440.58  | 3085.479 | 6748.333 | 2357.349 | 2914.069 | 2670.789 |
| ENSSSCG00000017137 | 238.012711  | 1.433419504  | 0.000332 | 0.007119 | 451.0317 | 223.4446 | 367.8191 | 197.276  | 80.65159 | 107.8533 |
| ENSSSCG00000040162 | 6273.093867 | -1.348151604 | 0.000338 | 0.007228 | 1997.426 | 6004.831 | 2612.612 | 10899    | 5831.322 | 10293.37 |
| ENSSSCG00000005400 | 84.28700838 | -1.731960661 | 0.000345 | 0.007313 | 34.62077 | 49.54642 | 32.89439 | 178.3455 | 63.6723  | 146.6427 |
| ENSSSCG00000009180 | 601.0833493 | -1.171431175 | 0.000345 | 0.007313 | 239.4603 | 566.3835 | 303.0271 | 852.87   | 841.5356 | 803.2235 |
| ENSSSCG00000012824 | 190.6683893 | 1.113528428  | 0.000344 | 0.007313 | 283.698  | 220.5301 | 278.1071 | 134.5064 | 123.0998 | 104.069  |
| ENSSSCG00000036956 | 165.8259346 | 1.192780999  | 0.000344 | 0.007313 | 289.4681 | 189.4422 | 213.3151 | 96.64532 | 94.44725 | 111.6377 |
| ENSSSCG00000038778 | 58.46867967 | -1.648020575 | 0.000345 | 0.007313 | 30.77402 | 30.11645 | 23.92319 | 97.64166 | 95.50846 | 72.84831 |
| ENSSSCG00000007925 | 118.4776683 | 1.520378881  | 0.000354 | 0.007481 | 204.8395 | 102.0073 | 220.2927 | 81.70016 | 50.93784 | 51.08842 |
| ENSSSCG00000029408 | 719.6180434 | -1.163292339 | 0.000356 | 0.007505 | 368.3265 | 626.6164 | 337.9151 | 916.636  | 733.2927 | 1334.922 |
| ENSSSCG00000004318 | 853.7348421 | -1.255971377 | 0.000358 | 0.007523 | 252.9239 | 765.5407 | 493.4158 | 1115.905 | 1105.776 | 1388.848 |
| ENSSSCG00000029449 | 142.3902688 | 2.311317918  | 0.000358 | 0.007523 | 187.5292 | 492.5497 | 30.90079 | 41.84643 | 63.6723  | 37.84328 |
| ENSSSCG00000013885 | 48.64812991 | 1.940113068  | 0.00036  | 0.007552 | 90.39867 | 48.57492 | 92.70236 | 19.92687 | 13.79567 | 26.49029 |
| ENSSSCG00000007146 | 373.125888  | 1.301716049  | 0.000361 | 0.007571 | 677.0283 | 370.1409 | 545.2494 | 267.02   | 261.0564 | 118.2602 |
| ENSSSCG00000025499 | 398.145901  | 1.268948806  | 0.000366 | 0.00766  | 848.2088 | 319.623  | 520.3294 | 220.1919 | 269.5461 | 210.9763 |

|                    |             |              |          |          |          |          |          |          |          |          |
|--------------------|-------------|--------------|----------|----------|----------|----------|----------|----------|----------|----------|
| ENSSSCG00000013601 | 1035.575126 | 1.072630927  | 0.000369 | 0.007704 | 1478.114 | 890.864  | 1842.086 | 625.7037 | 794.8426 | 581.8404 |
| ENSSSCG00000022343 | 8946.041847 | 1.047602576  | 0.00038  | 0.0079   | 14501.29 | 7246.406 | 14427.68 | 5138.143 | 7066.565 | 5296.166 |
| ENSSSCG00000039633 | 6.668177203 | 6.179865737  | 0.000381 | 0.007917 | 17.31038 | 8.743485 | 13.95519 | 0        | 0        | 0        |
| ENSSSCG00000032768 | 491.3471818 | 1.239428083  | 0.000382 | 0.007921 | 771.2738 | 397.3428 | 902.1037 | 257.0566 | 389.4623 | 230.844  |
| ENSSSCG00000017311 | 117.4371672 | 1.365236981  | 0.000387 | 0.008005 | 205.8012 | 125.3233 | 176.4335 | 49.81717 | 75.34556 | 71.90222 |
| ENSSSCG00000004233 | 9801.64665  | 1.085225103  | 0.00039  | 0.008066 | 18657.71 | 8138.242 | 13174.7  | 5334.423 | 7774.388 | 5730.418 |
| ENSSSCG00000001252 | 229.6338    | 1.169559074  | 0.000393 | 0.008112 | 344.2843 | 315.737  | 294.0559 | 155.4296 | 92.32484 | 175.9712 |
| ENSSSCG00000010132 | 3644.632091 | 1.269855508  | 0.000394 | 0.008113 | 5413.342 | 2242.218 | 7801.951 | 2243.765 | 2249.755 | 1916.762 |
| ENSSSCG00000013119 | 166.0253194 | 1.430509917  | 0.000394 | 0.008113 | 282.7363 | 251.6181 | 192.3823 | 134.5064 | 48.81543 | 86.09345 |
| ENSSSCG00000002857 | 71.0949723  | -1.818573364 | 0.000403 | 0.008273 | 54.81621 | 21.37296 | 17.94239 | 117.5685 | 123.0998 | 91.76994 |
| ENSSSCG00000039894 | 4140.005908 | 1.068733319  | 0.000404 | 0.008278 | 7229.008 | 3227.318 | 6364.566 | 3116.562 | 2485.342 | 2417.239 |
| ENSSSCG00000023527 | 302.6606006 | 1.348234895  | 0.000407 | 0.008319 | 561.6258 | 208.8721 | 533.2878 | 140.4844 | 199.5066 | 172.1869 |
| ENSSSCG00000010447 | 3950.189973 | -1.066195005 | 0.000409 | 0.008341 | 1731.038 | 2378.228 | 3551.597 | 5639.304 | 3965.723 | 6435.249 |
| ENSSSCG00000016367 | 963.9635071 | 1.097982079  | 0.000409 | 0.008341 | 1778.161 | 766.5122 | 1397.513 | 650.6123 | 565.6223 | 625.3601 |
| ENSSSCG00000012018 | 192.9718082 | -1.207752885 | 0.000412 | 0.008393 | 84.62854 | 147.6677 | 117.6224 | 292.925  | 212.241  | 302.7462 |
| ENSSSCG00000014431 | 491.5049423 | 1.317855941  | 0.000414 | 0.008419 | 932.8373 | 324.4804 | 847.2797 | 265.0274 | 343.8304 | 235.5744 |
| ENSSSCG00000037376 | 3559.970415 | 1.2468747    | 0.000417 | 0.008457 | 4343.945 | 4585.472 | 6098.42  | 3563.921 | 1297.854 | 1470.211 |
| ENSSSCG00000003064 | 244.9198739 | 1.305480041  | 0.000422 | 0.008539 | 388.5219 | 204.9862 | 452.547  | 152.4406 | 169.7928 | 101.2308 |
| ENSSSCG00000006296 | 169.005258  | 1.246203583  | 0.000423 | 0.008547 | 317.357  | 179.7272 | 216.3055 | 115.5758 | 83.8352  | 101.2308 |
| ENSSSCG00000020813 | 531.0954293 | 1.136468838  | 0.000425 | 0.008564 | 1017.466 | 473.1197 | 699.7533 | 398.5374 | 276.9745 | 320.7218 |
| ENSSSCG00000024108 | 2368.471682 | 1.21599878   | 0.000432 | 0.008692 | 4722.85  | 1644.747 | 3566.549 | 1501.49  | 1686.255 | 1088.94  |
| ENSSSCG00000040918 | 71.54183075 | -1.989969245 | 0.000435 | 0.008745 | 46.16102 | 30.11645 | 9.967996 | 166.3894 | 101.8757 | 74.74047 |
| ENSSSCG00000007995 | 254.9189153 | 1.480187876  | 0.000441 | 0.00884  | 502.0011 | 160.2972 | 463.5118 | 160.4113 | 149.6299 | 93.66211 |
| ENSSSCG00000016239 | 17.27052386 | 3.397955135  | 0.000441 | 0.008842 | 24.0422  | 44.68892 | 25.91679 | 0        | 4.24482  | 4.73041  |
| ENSSSCG00000031216 | 248.750824  | -1.412104907 | 0.000445 | 0.0089   | 66.35647 | 211.7866 | 129.5839 | 388.574  | 278.0357 | 418.1682 |
| ENSSSCG00000037387 | 363.2624114 | 1.224742469  | 0.000455 | 0.009062 | 619.3271 | 267.162  | 639.9454 | 219.1956 | 223.9143 | 210.0302 |
| ENSSSCG00000012508 | 72.70998928 | -1.833644247 | 0.000456 | 0.009067 | 34.62077 | 33.03094 | 27.91039 | 45.8318  | 145.3851 | 149.4809 |
| ENSSSCG00000017723 | 363.1174593 | 1.340181872  | 0.000456 | 0.009067 | 711.6491 | 488.6637 | 361.8383 | 193.2906 | 116.7326 | 306.5305 |
| ENSSSCG00000008842 | 1027.0112   | -1.399393129 | 0.000458 | 0.009099 | 877.0594 | 330.3094 | 486.4382 | 729.3234 | 1753.111 | 1985.826 |
| ENSSSCG00000005645 | 419.0805987 | 1.046221546  | 0.00046  | 0.009123 | 627.0206 | 406.0863 | 660.8781 | 305.8774 | 296.0762 | 218.5449 |
| ENSSSCG00000028567 | 2655.659978 | -1.126913252 | 0.000467 | 0.009239 | 1113.635 | 2043.061 | 1848.066 | 3434.396 | 2380.283 | 5114.519 |
| ENSSSCG00000011482 | 256.4224607 | -1.02221713  | 0.000472 | 0.009312 | 174.0655 | 170.0122 | 163.4751 | 417.4679 | 326.8512 | 286.6628 |
| ENSSSCG00000015426 | 356.8973366 | -1.500108085 | 0.000475 | 0.009353 | 80.78179 | 342.9389 | 135.5647 | 507.1388 | 568.8059 | 506.1538 |
| ENSSSCG00000035032 | 6.657420071 | 6.17766453   | 0.000477 | 0.009386 | 21.15714 | 5.82899  | 12.95839 | 0        | 0        | 0        |
| ENSSSCG00000002385 | 591.1293362 | -1.169350411 | 0.000484 | 0.009479 | 204.8395 | 431.3453 | 455.5374 | 1034.205 | 696.1505 | 724.6987 |

|                    |             |              |          |          |          |          |          |          |          |          |
|--------------------|-------------|--------------|----------|----------|----------|----------|----------|----------|----------|----------|
| ENSSSCG00000006888 | 27.26957871 | -2.642882861 | 0.000491 | 0.009591 | 5.770128 | 2.914495 | 13.95519 | 32.87933 | 37.14218 | 70.95614 |
| ENSSSCG00000031033 | 35.50906157 | -2.293408706 | 0.000494 | 0.00964  | 5.770128 | 21.37296 | 8.971197 | 63.76598 | 40.32579 | 72.84831 |
| ENSSSCG00000012943 | 349.6400958 | 1.061324776  | 0.000497 | 0.009689 | 477.9589 | 334.1954 | 606.0542 | 204.2504 | 248.322  | 227.0597 |
| ENSSSCG00000001720 | 568.3375845 | -1.221056001 | 0.000501 | 0.009737 | 208.6863 | 468.2622 | 346.8863 | 739.2869 | 556.0715 | 1090.832 |
| ENSSSCG00000002680 | 202.3133035 | 1.570862404  | 0.000501 | 0.009737 | 378.9051 | 123.3803 | 405.6974 | 89.67091 | 144.3239 | 71.90222 |
| ENSSSCG00000006811 | 210.8892306 | 1.378071159  | 0.000504 | 0.009778 | 293.3148 | 168.0692 | 452.547  | 137.4954 | 88.08002 | 125.8289 |
| ENSSSCG00000035563 | 56.02108445 | 1.725344863  | 0.000504 | 0.009779 | 100.0155 | 55.37541 | 102.6704 | 29.8903  | 25.46892 | 22.70597 |
| ENSSSCG00000005301 | 1005.062731 | 1.166882858  | 0.000507 | 0.009817 | 1696.418 | 786.9137 | 1688.579 | 527.0657 | 830.9236 | 500.4773 |
| ENSSSCG00000014049 | 314.0481866 | 1.248582818  | 0.000511 | 0.009874 | 493.3459 | 249.6751 | 583.1278 | 140.4844 | 213.3022 | 204.3537 |
| ENSSSCG00000004652 | 4149.473861 | -1.042746036 | 0.000516 | 0.009921 | 2028.2   | 4126.925 | 1980.641 | 5526.717 | 5883.321 | 5351.039 |
| ENSSSCG00000012978 | 187.054803  | 1.564996007  | 0.000517 | 0.009921 | 400.0622 | 109.7793 | 328.9439 | 121.5539 | 89.14123 | 72.84831 |
| ENSSSCG00000018044 | 43.50385738 | 2.047969043  | 0.000518 | 0.009921 | 82.70517 | 79.66286 | 47.84638 | 27.89762 | 10.61205 | 12.29906 |
| ENSSSCG00000029305 | 141.9976012 | -1.437285942 | 0.000518 | 0.009921 | 50.96946 | 61.2044  | 117.6224 | 219.1956 | 252.5668 | 150.427  |
| ENSSSCG00000034723 | 342.3895501 | 1.356851883  | 0.000515 | 0.009921 | 672.2199 | 233.1596 | 572.163  | 251.0786 | 150.6911 | 175.0252 |
| ENSSSCG00000031367 | 15.54168987 | -3.261592846 | 0.000519 | 0.009942 | 0.961688 | 4.857492 | 2.990399 | 20.92321 | 36.08097 | 27.43638 |
| ENSSSCG00000036008 | 102.8402364 | 2.444300763  | 0.000521 | 0.009957 | 100.9772 | 139.8958 | 280.1007 | 16.93784 | 75.34556 | 3.784328 |
| ENSSSCG00000033998 | 401.0618081 | 1.222730173  | 0.000523 | 0.009973 | 633.7524 | 559.5831 | 491.4222 | 361.6727 | 134.773  | 225.1675 |

**Table S2. The annotation of identified lncRNAs with gtf format.**

|                        |          |            |   |   |                                 |            |
|------------------------|----------|------------|---|---|---------------------------------|------------|
| 1 StringTie transcript | 824024   | 825885 .   | + | . | transcript_MSTRG.49.4; gene_id  | MSTRG.49;  |
| 1 StringTie exon       | 824024   | 824270 .   | + | . | transcript_MSTRG.49.4; gene_id  | MSTRG.49;  |
| 1 StringTie exon       | 825375   | 825496 .   | + | . | transcript_MSTRG.49.4; gene_id  | MSTRG.49;  |
| 1 StringTie exon       | 825769   | 825885 .   | + | . | transcript_MSTRG.49.4; gene_id  | MSTRG.49;  |
| 1 StringTie transcript | 1698902  | 1710066 .  | + | . | transcript_MSTRG.67.1; gene_id  | MSTRG.67;  |
| 1 StringTie exon       | 1698902  | 1698946 .  | + | . | transcript_MSTRG.67.1; gene_id  | MSTRG.67;  |
| 1 StringTie exon       | 1707172  | 1710066 .  | + | . | transcript_MSTRG.67.1; gene_id  | MSTRG.67;  |
| 1 StringTie transcript | 1698913  | 1709664 .  | + | . | transcript_MSTRG.67.2; gene_id  | MSTRG.67;  |
| 1 StringTie exon       | 1698913  | 1698999 .  | + | . | transcript_MSTRG.67.2; gene_id  | MSTRG.67;  |
| 1 StringTie exon       | 1707172  | 1709664 .  | + | . | transcript_MSTRG.67.2; gene_id  | MSTRG.67;  |
| 1 StringTie transcript | 4321011  | 4330835 .  | + | . | transcript_MSTRG.86.1; gene_id  | MSTRG.86;  |
| 1 StringTie exon       | 4321011  | 4321192 .  | + | . | transcript_MSTRG.86.1; gene_id  | MSTRG.86;  |
| 1 StringTie exon       | 4322916  | 4330835 .  | + | . | transcript_MSTRG.86.1; gene_id  | MSTRG.86;  |
| 1 StringTie transcript | 4885871  | 4888328 .  | + | . | transcript_MSTRG.93.1; gene_id  | MSTRG.93;  |
| 1 StringTie exon       | 4885871  | 4887145 .  | + | . | transcript_MSTRG.93.1; gene_id  | MSTRG.93;  |
| 1 StringTie exon       | 4888059  | 4888328 .  | + | . | transcript_MSTRG.93.1; gene_id  | MSTRG.93;  |
| 1 StringTie transcript | 12122655 | 12126138 . | + | . | transcript_MSTRG.224.1; gene_id | MSTRG.224; |
| 1 StringTie exon       | 12122655 | 12126138 . | + | . | transcript_MSTRG.224.1; gene_id | MSTRG.224; |
| 1 StringTie transcript | 12122900 | 12124707 . | + | . | transcript_MSTRG.224.2; gene_id | MSTRG.224; |
| 1 StringTie exon       | 12122900 | 12123333 . | + | . | transcript_MSTRG.224.2; gene_id | MSTRG.224; |
| 1 StringTie exon       | 12124562 | 12124707 . | + | . | transcript_MSTRG.224.2; gene_id | MSTRG.224; |
| 1 StringTie transcript | 17511780 | 17514478 . | + | . | transcript_MSTRG.326.1; gene_id | MSTRG.326; |
| 1 StringTie exon       | 17511780 | 17512929 . | + | . | transcript_MSTRG.326.1; gene_id | MSTRG.326; |
| 1 StringTie exon       | 17514014 | 17514478 . | + | . | transcript_MSTRG.326.1; gene_id | MSTRG.326; |
| 1 StringTie transcript | 28229063 | 28233940 . | + | . | transcript_MSTRG.608.1; gene_id | MSTRG.608; |
| 1 StringTie exon       | 28229063 | 28230164 . | + | . | transcript_MSTRG.608.1; gene_id | MSTRG.608; |
| 1 StringTie exon       | 28230834 | 28231034 . | + | . | transcript_MSTRG.608.1; gene_id | MSTRG.608; |
| 1 StringTie exon       | 28233091 | 28233940 . | + | . | transcript_MSTRG.608.1; gene_id | MSTRG.608; |
| 1 StringTie transcript | 29922876 | 29927248 . | + | . | transcript_MSTRG.628.1; gene_id | MSTRG.628; |
| 1 StringTie exon       | 29922876 | 29923063 . | + | . | transcript_MSTRG.628.1; gene_id | MSTRG.628; |
| 1 StringTie exon       | 29926724 | 29927248 . | + | . | transcript_MSTRG.628.1; gene_id | MSTRG.628; |
| 1 StringTie transcript | 30390985 | 30448644 . | + | . | transcript_MSTRG.638.1; gene_id | MSTRG.638; |
| 1 StringTie exon       | 30390985 | 30391033 . | + | . | transcript_MSTRG.638.1; gene_id | MSTRG.638; |
| 1 StringTie exon       | 30444609 | 30448644 . | + | . | transcript_MSTRG.638.1; gene_id | MSTRG.638; |

|                       |          |          |   |   |   |                                  |             |
|-----------------------|----------|----------|---|---|---|----------------------------------|-------------|
| 1 StringTie transcrip | 30776390 | 30787599 | . | + | . | transcript_MSTRG.635.1; gene_id  | MSTRG.635;  |
| 1 StringTie exon      | 30776390 | 30776606 | . | + | . | transcript_MSTRG.635.1; gene_id  | MSTRG.635;  |
| 1 StringTie exon      | 30780720 | 30787599 | . | + | . | transcript_MSTRG.635.1; gene_id  | MSTRG.635;  |
| 1 StringTie transcrip | 44257834 | 44261820 | . | + | . | transcript_MSTRG.851.1; gene_id  | MSTRG.851;  |
| 1 StringTie exon      | 44257834 | 44257932 | . | + | . | transcript_MSTRG.851.1; gene_id  | MSTRG.851;  |
| 1 StringTie exon      | 44259743 | 44261820 | . | + | . | transcript_MSTRG.851.1; gene_id  | MSTRG.851;  |
| 1 StringTie transcrip | 56160835 | 56178673 | . | + | . | transcript_MSTRG.1016.1; gene_id | MSTRG.1016; |
| 1 StringTie exon      | 56160835 | 56160882 | . | + | . | transcript_MSTRG.1016.1; gene_id | MSTRG.1016; |
| 1 StringTie exon      | 56178141 | 56178673 | . | + | . | transcript_MSTRG.1016.1; gene_id | MSTRG.1016; |
| 1 StringTie transcrip | 56360451 | 56362017 | . | + | . | transcript_MSTRG.1020.1; gene_id | MSTRG.1020; |
| 1 StringTie exon      | 56360451 | 56360606 | . | + | . | transcript_MSTRG.1020.1; gene_id | MSTRG.1020; |
| 1 StringTie exon      | 56361672 | 56362017 | . | + | . | transcript_MSTRG.1020.1; gene_id | MSTRG.1020; |
| 1 StringTie transcrip | 72085711 | 72093501 | . | + | . | transcript_MSTRG.1208.1; gene_id | MSTRG.1208; |
| 1 StringTie exon      | 72085711 | 72085812 | . | + | . | transcript_MSTRG.1208.1; gene_id | MSTRG.1208; |
| 1 StringTie exon      | 72093355 | 72093501 | . | + | . | transcript_MSTRG.1208.1; gene_id | MSTRG.1208; |
| 1 StringTie transcrip | 76245833 | 76248251 | . | + | . | transcript_MSTRG.1294.1; gene_id | MSTRG.1294; |
| 1 StringTie exon      | 76245833 | 76248014 | . | + | . | transcript_MSTRG.1294.1; gene_id | MSTRG.1294; |
| 1 StringTie exon      | 76248035 | 76248251 | . | + | . | transcript_MSTRG.1294.1; gene_id | MSTRG.1294; |
| 1 StringTie transcrip | 76623298 | 76660599 | . | + | . | transcript_MSTRG.1304.1; gene_id | MSTRG.1304; |
| 1 StringTie exon      | 76623298 | 76623338 | . | + | . | transcript_MSTRG.1304.1; gene_id | MSTRG.1304; |
| 1 StringTie exon      | 76660165 | 76660599 | . | + | . | transcript_MSTRG.1304.1; gene_id | MSTRG.1304; |
| 1 StringTie transcrip | 77193637 | 77210343 | . | + | . | transcript_MSTRG.1333.1; gene_id | MSTRG.1333; |
| 1 StringTie exon      | 77193637 | 77194996 | . | + | . | transcript_MSTRG.1333.1; gene_id | MSTRG.1333; |
| 1 StringTie exon      | 77210052 | 77210343 | . | + | . | transcript_MSTRG.1333.1; gene_id | MSTRG.1333; |
| 1 StringTie transcrip | 77410264 | 77414849 | . | + | . | transcript_MSTRG.1335.1; gene_id | MSTRG.1335; |
| 1 StringTie exon      | 77410264 | 77412285 | . | + | . | transcript_MSTRG.1335.1; gene_id | MSTRG.1335; |
| 1 StringTie exon      | 77413971 | 77414849 | . | + | . | transcript_MSTRG.1335.1; gene_id | MSTRG.1335; |
| 1 StringTie transcrip | 77608027 | 77609251 | . | + | . | transcript_MSTRG.1331.1; gene_id | MSTRG.1331; |
| 1 StringTie exon      | 77608027 | 77608354 | . | + | . | transcript_MSTRG.1331.1; gene_id | MSTRG.1331; |
| 1 StringTie exon      | 77608718 | 77608804 | . | + | . | transcript_MSTRG.1331.1; gene_id | MSTRG.1331; |
| 1 StringTie exon      | 77609123 | 77609251 | . | + | . | transcript_MSTRG.1331.1; gene_id | MSTRG.1331; |
| 1 StringTie transcrip | 78149331 | 78152555 | . | + | . | transcript_MSTRG.1356.1; gene_id | MSTRG.1356; |
| 1 StringTie exon      | 78149331 | 78149440 | . | + | . | transcript_MSTRG.1356.1; gene_id | MSTRG.1356; |
| 1 StringTie exon      | 78151636 | 78152555 | . | + | . | transcript_MSTRG.1356.1; gene_id | MSTRG.1356; |
| 1 StringTie transcrip | 94347889 | 94349382 | . | + | . | transcript_MSTRG.1514.1; gene_id | MSTRG.1514; |



|                        |           |           |   |   |   |                                 |             |
|------------------------|-----------|-----------|---|---|---|---------------------------------|-------------|
| 1 StringTie exon       | 94347889  | 94349289  | . | + | . | transcript_MSTRG.1514.1;gene_id | MSTRG.1514; |
| 1 StringTie exon       | 94349318  | 94349382  | . | + | . | transcript_MSTRG.1514.1;gene_id | MSTRG.1514; |
| 1 StringTie transcript | 100540201 | 100541824 | . | + | . | transcript_MSTRG.1598.1;gene_id | MSTRG.1598; |
| 1 StringTie exon       | 100540201 | 100541382 | . | + | . | transcript_MSTRG.1598.1;gene_id | MSTRG.1598; |
| 1 StringTie exon       | 100541673 | 100541824 | . | + | . | transcript_MSTRG.1598.1;gene_id | MSTRG.1598; |
| 1 StringTie transcript | 106898615 | 106901503 | . | + | . | transcript_MSTRG.1640.1;gene_id | MSTRG.1640; |
| 1 StringTie exon       | 106898615 | 106898706 | . | + | . | transcript_MSTRG.1640.1;gene_id | MSTRG.1640; |
| 1 StringTie exon       | 106898808 | 106898954 | . | + | . | transcript_MSTRG.1640.1;gene_id | MSTRG.1640; |
| 1 StringTie exon       | 106901457 | 106901503 | . | + | . | transcript_MSTRG.1640.1;gene_id | MSTRG.1640; |
| 1 StringTie transcript | 106928511 | 106963920 | . | + | . | transcript_MSTRG.1648.1;gene_id | MSTRG.1648; |
| 1 StringTie exon       | 106928511 | 106928587 | . | + | . | transcript_MSTRG.1648.1;gene_id | MSTRG.1648; |
| 1 StringTie exon       | 106963094 | 106963920 | . | + | . | transcript_MSTRG.1648.1;gene_id | MSTRG.1648; |
| 1 StringTie transcript | 106933231 | 106964010 | . | + | . | transcript_MSTRG.1648.2;gene_id | MSTRG.1648; |
| 1 StringTie exon       | 106933231 | 106933434 | . | + | . | transcript_MSTRG.1648.2;gene_id | MSTRG.1648; |
| 1 StringTie exon       | 106963094 | 106964010 | . | + | . | transcript_MSTRG.1648.2;gene_id | MSTRG.1648; |
| 1 StringTie transcript | 106952799 | 106963943 | . | + | . | transcript_MSTRG.1648.3;gene_id | MSTRG.1648; |
| 1 StringTie exon       | 106952799 | 106952831 | . | + | . | transcript_MSTRG.1648.3;gene_id | MSTRG.1648; |
| 1 StringTie exon       | 106963094 | 106963943 | . | + | . | transcript_MSTRG.1648.3;gene_id | MSTRG.1648; |
| 1 StringTie transcript | 106953206 | 106964010 | . | + | . | transcript_MSTRG.1648.4;gene_id | MSTRG.1648; |
| 1 StringTie exon       | 106953206 | 106953452 | . | + | . | transcript_MSTRG.1648.4;gene_id | MSTRG.1648; |
| 1 StringTie exon       | 106963094 | 106964010 | . | + | . | transcript_MSTRG.1648.4;gene_id | MSTRG.1648; |
| 1 StringTie transcript | 108436435 | 108440266 | . | + | . | transcript_MSTRG.1681.1;gene_id | MSTRG.1681; |
| 1 StringTie exon       | 108436435 | 108438315 | . | + | . | transcript_MSTRG.1681.1;gene_id | MSTRG.1681; |
| 1 StringTie exon       | 108438339 | 108440266 | . | + | . | transcript_MSTRG.1681.1;gene_id | MSTRG.1681; |
| 1 StringTie transcript | 109501888 | 109503695 | . | + | . | transcript_MSTRG.1699.1;gene_id | MSTRG.1699; |
| 1 StringTie exon       | 109501888 | 109501921 | . | + | . | transcript_MSTRG.1699.1;gene_id | MSTRG.1699; |
| 1 StringTie exon       | 109503405 | 109503695 | . | + | . | transcript_MSTRG.1699.1;gene_id | MSTRG.1699; |
| 1 StringTie transcript | 114266958 | 114297706 | . | + | . | transcript_MSTRG.1906.1;gene_id | MSTRG.1906; |
| 1 StringTie exon       | 114266958 | 114267022 | . | + | . | transcript_MSTRG.1906.1;gene_id | MSTRG.1906; |
| 1 StringTie exon       | 114288512 | 114288636 | . | + | . | transcript_MSTRG.1906.1;gene_id | MSTRG.1906; |
| 1 StringTie exon       | 114289261 | 114289410 | . | + | . | transcript_MSTRG.1906.1;gene_id | MSTRG.1906; |
| 1 StringTie exon       | 114297196 | 114297706 | . | + | . | transcript_MSTRG.1906.1;gene_id | MSTRG.1906; |
| 1 StringTie transcript | 115753971 | 115824683 | . | + | . | transcript_MSTRG.1938.1;gene_id | MSTRG.1938; |
| 1 StringTie exon       | 115753971 | 115754005 | . | + | . | transcript_MSTRG.1938.1;gene_id | MSTRG.1938; |
| 1 StringTie exon       | 115823226 | 115824683 | . | + | . | transcript_MSTRG.1938.1;gene_id | MSTRG.1938; |

|                       |           |           |   |   |   |                                 |             |
|-----------------------|-----------|-----------|---|---|---|---------------------------------|-------------|
| 1 StringTie transcrip | 123403207 | 123547751 | . | + | . | transcript_MSTRG.2057.1;gene_id | MSTRG.2057; |
| 1 StringTie exon      | 123403207 | 123403379 | . | + | . | transcript_MSTRG.2057.1;gene_id | MSTRG.2057; |
| 1 StringTie exon      | 123474792 | 123474880 | . | + | . | transcript_MSTRG.2057.1;gene_id | MSTRG.2057; |
| 1 StringTie exon      | 123475421 | 123475478 | . | + | . | transcript_MSTRG.2057.1;gene_id | MSTRG.2057; |
| 1 StringTie exon      | 123499743 | 123499833 | . | + | . | transcript_MSTRG.2057.1;gene_id | MSTRG.2057; |
| 1 StringTie exon      | 123509580 | 123509661 | . | + | . | transcript_MSTRG.2057.1;gene_id | MSTRG.2057; |
| 1 StringTie exon      | 123515508 | 123515620 | . | + | . | transcript_MSTRG.2057.1;gene_id | MSTRG.2057; |
| 1 StringTie exon      | 123534011 | 123534196 | . | + | . | transcript_MSTRG.2057.1;gene_id | MSTRG.2057; |
| 1 StringTie exon      | 123538658 | 123538746 | . | + | . | transcript_MSTRG.2057.1;gene_id | MSTRG.2057; |
| 1 StringTie exon      | 123547663 | 123547751 | . | + | . | transcript_MSTRG.2057.1;gene_id | MSTRG.2057; |
| 1 StringTie transcrip | 123461094 | 123547743 | . | + | . | transcript_MSTRG.2057.2;gene_id | MSTRG.2057; |
| 1 StringTie exon      | 123461094 | 123461592 | . | + | . | transcript_MSTRG.2057.2;gene_id | MSTRG.2057; |
| 1 StringTie exon      | 123473645 | 123473726 | . | + | . | transcript_MSTRG.2057.2;gene_id | MSTRG.2057; |
| 1 StringTie exon      | 123474792 | 123474880 | . | + | . | transcript_MSTRG.2057.2;gene_id | MSTRG.2057; |
| 1 StringTie exon      | 123475421 | 123475478 | . | + | . | transcript_MSTRG.2057.2;gene_id | MSTRG.2057; |
| 1 StringTie exon      | 123499743 | 123499833 | . | + | . | transcript_MSTRG.2057.2;gene_id | MSTRG.2057; |
| 1 StringTie exon      | 123509580 | 123509661 | . | + | . | transcript_MSTRG.2057.2;gene_id | MSTRG.2057; |
| 1 StringTie exon      | 123515508 | 123515620 | . | + | . | transcript_MSTRG.2057.2;gene_id | MSTRG.2057; |
| 1 StringTie exon      | 123534011 | 123534196 | . | + | . | transcript_MSTRG.2057.2;gene_id | MSTRG.2057; |
| 1 StringTie exon      | 123538658 | 123538746 | . | + | . | transcript_MSTRG.2057.2;gene_id | MSTRG.2057; |
| 1 StringTie exon      | 123547663 | 123547743 | . | + | . | transcript_MSTRG.2057.2;gene_id | MSTRG.2057; |
| 1 StringTie transcrip | 123461095 | 123548837 | . | + | . | transcript_MSTRG.2057.3;gene_id | MSTRG.2057; |
| 1 StringTie exon      | 123461095 | 123461592 | . | + | . | transcript_MSTRG.2057.3;gene_id | MSTRG.2057; |
| 1 StringTie exon      | 123473705 | 123473726 | . | + | . | transcript_MSTRG.2057.3;gene_id | MSTRG.2057; |
| 1 StringTie exon      | 123474792 | 123474880 | . | + | . | transcript_MSTRG.2057.3;gene_id | MSTRG.2057; |
| 1 StringTie exon      | 123475421 | 123475478 | . | + | . | transcript_MSTRG.2057.3;gene_id | MSTRG.2057; |
| 1 StringTie exon      | 123499743 | 123499833 | . | + | . | transcript_MSTRG.2057.3;gene_id | MSTRG.2057; |
| 1 StringTie exon      | 123509580 | 123509661 | . | + | . | transcript_MSTRG.2057.3;gene_id | MSTRG.2057; |
| 1 StringTie exon      | 123515508 | 123515620 | . | + | . | transcript_MSTRG.2057.3;gene_id | MSTRG.2057; |
| 1 StringTie exon      | 123534011 | 123534196 | . | + | . | transcript_MSTRG.2057.3;gene_id | MSTRG.2057; |
| 1 StringTie exon      | 123538658 | 123538746 | . | + | . | transcript_MSTRG.2057.3;gene_id | MSTRG.2057; |
| 1 StringTie exon      | 123547663 | 123548837 | . | + | . | transcript_MSTRG.2057.3;gene_id | MSTRG.2057; |
| 1 StringTie transcrip | 123461484 | 123547743 | . | + | . | transcript_MSTRG.2057.5;gene_id | MSTRG.2057; |
| 1 StringTie exon      | 123461484 | 123461592 | . | + | . | transcript_MSTRG.2057.5;gene_id | MSTRG.2057; |
| 1 StringTie exon      | 123473705 | 123473726 | . | + | . | transcript_MSTRG.2057.5;gene_id | MSTRG.2057; |

|                        |           |           |   |   |   |                                 |             |
|------------------------|-----------|-----------|---|---|---|---------------------------------|-------------|
| 1 StringTie exon       | 123474792 | 123474880 | . | + | . | transcript_MSTRG.2057.5;gene_id | MSTRG.2057; |
| 1 StringTie exon       | 123475421 | 123475478 | . | + | . | transcript_MSTRG.2057.5;gene_id | MSTRG.2057; |
| 1 StringTie exon       | 123509580 | 123509661 | . | + | . | transcript_MSTRG.2057.5;gene_id | MSTRG.2057; |
| 1 StringTie exon       | 123515508 | 123515620 | . | + | . | transcript_MSTRG.2057.5;gene_id | MSTRG.2057; |
| 1 StringTie exon       | 123534011 | 123534196 | . | + | . | transcript_MSTRG.2057.5;gene_id | MSTRG.2057; |
| 1 StringTie exon       | 123538658 | 123538746 | . | + | . | transcript_MSTRG.2057.5;gene_id | MSTRG.2057; |
| 1 StringTie exon       | 123547663 | 123547743 | . | + | . | transcript_MSTRG.2057.5;gene_id | MSTRG.2057; |
| 1 StringTie transcript | 123461484 | 123547743 | . | + | . | transcript_MSTRG.2057.4;gene_id | MSTRG.2057; |
| 1 StringTie exon       | 123461484 | 123461592 | . | + | . | transcript_MSTRG.2057.4;gene_id | MSTRG.2057; |
| 1 StringTie exon       | 123473651 | 123473726 | . | + | . | transcript_MSTRG.2057.4;gene_id | MSTRG.2057; |
| 1 StringTie exon       | 123474792 | 123474880 | . | + | . | transcript_MSTRG.2057.4;gene_id | MSTRG.2057; |
| 1 StringTie exon       | 123475421 | 123475478 | . | + | . | transcript_MSTRG.2057.4;gene_id | MSTRG.2057; |
| 1 StringTie exon       | 123499743 | 123499833 | . | + | . | transcript_MSTRG.2057.4;gene_id | MSTRG.2057; |
| 1 StringTie exon       | 123509580 | 123509661 | . | + | . | transcript_MSTRG.2057.4;gene_id | MSTRG.2057; |
| 1 StringTie exon       | 123515508 | 123515620 | . | + | . | transcript_MSTRG.2057.4;gene_id | MSTRG.2057; |
| 1 StringTie exon       | 123534011 | 123534196 | . | + | . | transcript_MSTRG.2057.4;gene_id | MSTRG.2057; |
| 1 StringTie exon       | 123538658 | 123538746 | . | + | . | transcript_MSTRG.2057.4;gene_id | MSTRG.2057; |
| 1 StringTie exon       | 123547663 | 123547743 | . | + | . | transcript_MSTRG.2057.4;gene_id | MSTRG.2057; |
| 1 StringTie transcript | 123471966 | 123504531 | . | + | . | transcript_MSTRG.2057.6;gene_id | MSTRG.2057; |
| 1 StringTie exon       | 123471966 | 123473726 | . | + | . | transcript_MSTRG.2057.6;gene_id | MSTRG.2057; |
| 1 StringTie exon       | 123474792 | 123474880 | . | + | . | transcript_MSTRG.2057.6;gene_id | MSTRG.2057; |
| 1 StringTie exon       | 123475421 | 123475478 | . | + | . | transcript_MSTRG.2057.6;gene_id | MSTRG.2057; |
| 1 StringTie exon       | 123499743 | 123499833 | . | + | . | transcript_MSTRG.2057.6;gene_id | MSTRG.2057; |
| 1 StringTie exon       | 123504165 | 123504531 | . | + | . | transcript_MSTRG.2057.6;gene_id | MSTRG.2057; |
| 1 StringTie transcript | 123499769 | 123547743 | . | + | . | transcript_MSTRG.2057.7;gene_id | MSTRG.2057; |
| 1 StringTie exon       | 123499769 | 123499833 | . | + | . | transcript_MSTRG.2057.7;gene_id | MSTRG.2057; |
| 1 StringTie exon       | 123509580 | 123509661 | . | + | . | transcript_MSTRG.2057.7;gene_id | MSTRG.2057; |
| 1 StringTie exon       | 123515508 | 123515620 | . | + | . | transcript_MSTRG.2057.7;gene_id | MSTRG.2057; |
| 1 StringTie exon       | 123538658 | 123538746 | . | + | . | transcript_MSTRG.2057.7;gene_id | MSTRG.2057; |
| 1 StringTie exon       | 123547663 | 123547743 | . | + | . | transcript_MSTRG.2057.7;gene_id | MSTRG.2057; |
| 1 StringTie transcript | 127937122 | 127938184 | . | + | . | transcript_MSTRG.2126.1;gene_id | MSTRG.2126; |
| 1 StringTie exon       | 127937122 | 127937173 | . | + | . | transcript_MSTRG.2126.1;gene_id | MSTRG.2126; |
| 1 StringTie exon       | 127937414 | 127937489 | . | + | . | transcript_MSTRG.2126.1;gene_id | MSTRG.2126; |
| 1 StringTie exon       | 127937984 | 127938184 | . | + | . | transcript_MSTRG.2126.1;gene_id | MSTRG.2126; |
| 1 StringTie transcript | 131428583 | 131429197 | . | + | . | transcript_MSTRG.2312.1;gene_id | MSTRG.2312; |

|                        |           |           |   |   |   |                                 |             |
|------------------------|-----------|-----------|---|---|---|---------------------------------|-------------|
| 1 StringTie exon       | 131428583 | 131428647 | . | + | . | transcript_MSTRG.2312.1;gene_id | MSTRG.2312; |
| 1 StringTie exon       | 131428694 | 131429197 | . | + | . | transcript_MSTRG.2312.1;gene_id | MSTRG.2312; |
| 1 StringTie transcript | 137308442 | 137319564 | . | + | . | transcript_MSTRG.2406.1;gene_id | MSTRG.2406; |
| 1 StringTie exon       | 137308442 | 137308482 | . | + | . | transcript_MSTRG.2406.1;gene_id | MSTRG.2406; |
| 1 StringTie exon       | 137316029 | 137316081 | . | + | . | transcript_MSTRG.2406.1;gene_id | MSTRG.2406; |
| 1 StringTie exon       | 137319328 | 137319564 | . | + | . | transcript_MSTRG.2406.1;gene_id | MSTRG.2406; |
| 1 StringTie transcript | 143506197 | 143508610 | . | + | . | transcript_MSTRG.2533.1;gene_id | MSTRG.2533; |
| 1 StringTie exon       | 143506197 | 143506218 | . | + | . | transcript_MSTRG.2533.1;gene_id | MSTRG.2533; |
| 1 StringTie exon       | 143507642 | 143508610 | . | + | . | transcript_MSTRG.2533.1;gene_id | MSTRG.2533; |
| 1 StringTie transcript | 156735451 | 156747020 | . | + | . | transcript_MSTRG.2656.1;gene_id | MSTRG.2656; |
| 1 StringTie exon       | 156735451 | 156735645 | . | + | . | transcript_MSTRG.2656.1;gene_id | MSTRG.2656; |
| 1 StringTie exon       | 156743825 | 156743916 | . | + | . | transcript_MSTRG.2656.1;gene_id | MSTRG.2656; |
| 1 StringTie exon       | 156746015 | 156747020 | . | + | . | transcript_MSTRG.2656.1;gene_id | MSTRG.2656; |
| 1 StringTie transcript | 156735523 | 156747530 | . | + | . | transcript_MSTRG.2656.2;gene_id | MSTRG.2656; |
| 1 StringTie exon       | 156735523 | 156735645 | . | + | . | transcript_MSTRG.2656.2;gene_id | MSTRG.2656; |
| 1 StringTie exon       | 156744486 | 156744657 | . | + | . | transcript_MSTRG.2656.2;gene_id | MSTRG.2656; |
| 1 StringTie exon       | 156746015 | 156747530 | . | + | . | transcript_MSTRG.2656.2;gene_id | MSTRG.2656; |
| 1 StringTie transcript | 158594579 | 158611713 | . | + | . | transcript_MSTRG.2665.1;gene_id | MSTRG.2665; |
| 1 StringTie exon       | 158594579 | 158594707 | . | + | . | transcript_MSTRG.2665.1;gene_id | MSTRG.2665; |
| 1 StringTie exon       | 158610810 | 158610891 | . | + | . | transcript_MSTRG.2665.1;gene_id | MSTRG.2665; |
| 1 StringTie exon       | 158611384 | 158611713 | . | + | . | transcript_MSTRG.2665.1;gene_id | MSTRG.2665; |
| 1 StringTie transcript | 163251698 | 163274835 | . | + | . | transcript_MSTRG.2747.1;gene_id | MSTRG.2747; |
| 1 StringTie exon       | 163251698 | 163252147 | . | + | . | transcript_MSTRG.2747.1;gene_id | MSTRG.2747; |
| 1 StringTie exon       | 163274795 | 163274835 | . | + | . | transcript_MSTRG.2747.1;gene_id | MSTRG.2747; |
| 1 StringTie transcript | 163894365 | 163952074 | . | + | . | transcript_MSTRG.2768.1;gene_id | MSTRG.2768; |
| 1 StringTie exon       | 163894365 | 163894606 | . | + | . | transcript_MSTRG.2768.1;gene_id | MSTRG.2768; |
| 1 StringTie exon       | 163951697 | 163952074 | . | + | . | transcript_MSTRG.2768.1;gene_id | MSTRG.2768; |
| 1 StringTie transcript | 180015227 | 180023529 | . | + | . | transcript_MSTRG.2984.2;gene_id | MSTRG.2984; |
| 1 StringTie exon       | 180015227 | 180015522 | . | + | . | transcript_MSTRG.2984.2;gene_id | MSTRG.2984; |
| 1 StringTie exon       | 180020346 | 180020439 | . | + | . | transcript_MSTRG.2984.2;gene_id | MSTRG.2984; |
| 1 StringTie exon       | 180022727 | 180023529 | . | + | . | transcript_MSTRG.2984.2;gene_id | MSTRG.2984; |
| 1 StringTie transcript | 180015227 | 180023529 | . | + | . | transcript_MSTRG.2984.1;gene_id | MSTRG.2984; |
| 1 StringTie exon       | 180015227 | 180015522 | . | + | . | transcript_MSTRG.2984.1;gene_id | MSTRG.2984; |
| 1 StringTie exon       | 180020346 | 180020439 | . | + | . | transcript_MSTRG.2984.1;gene_id | MSTRG.2984; |
| 1 StringTie exon       | 180022765 | 180023529 | . | + | . | transcript_MSTRG.2984.1;gene_id | MSTRG.2984; |

|                       |           |           |   |   |   |                                 |             |
|-----------------------|-----------|-----------|---|---|---|---------------------------------|-------------|
| 1 StringTie transcrip | 183863604 | 183868043 | . | + | . | transcript_MSTRG.3076.1;gene_id | MSTRG.3076; |
| 1 StringTie exon      | 183863604 | 183863629 | . | + | . | transcript_MSTRG.3076.1;gene_id | MSTRG.3076; |
| 1 StringTie exon      | 183867805 | 183868043 | . | + | . | transcript_MSTRG.3076.1;gene_id | MSTRG.3076; |
| 1 StringTie transcrip | 189621835 | 189630724 | . | + | . | transcript_MSTRG.3199.1;gene_id | MSTRG.3199; |
| 1 StringTie exon      | 189621835 | 189623205 | . | + | . | transcript_MSTRG.3199.1;gene_id | MSTRG.3199; |
| 1 StringTie exon      | 189627061 | 189630724 | . | + | . | transcript_MSTRG.3199.1;gene_id | MSTRG.3199; |
| 1 StringTie transcrip | 189624750 | 189629280 | . | + | . | transcript_MSTRG.3199.2;gene_id | MSTRG.3199; |
| 1 StringTie exon      | 189624750 | 189625064 | . | + | . | transcript_MSTRG.3199.2;gene_id | MSTRG.3199; |
| 1 StringTie exon      | 189627061 | 189629280 | . | + | . | transcript_MSTRG.3199.2;gene_id | MSTRG.3199; |
| 1 StringTie transcrip | 190167521 | 190175130 | . | + | . | transcript_MSTRG.3215.1;gene_id | MSTRG.3215; |
| 1 StringTie exon      | 190167521 | 190170132 | . | + | . | transcript_MSTRG.3215.1;gene_id | MSTRG.3215; |
| 1 StringTie exon      | 190171521 | 190171644 | . | + | . | transcript_MSTRG.3215.1;gene_id | MSTRG.3215; |
| 1 StringTie exon      | 190172038 | 190175130 | . | + | . | transcript_MSTRG.3215.1;gene_id | MSTRG.3215; |
| 1 StringTie transcrip | 194017899 | 194030457 | . | + | . | transcript_MSTRG.3334.1;gene_id | MSTRG.3334; |
| 1 StringTie exon      | 194017899 | 194018205 | . | + | . | transcript_MSTRG.3334.1;gene_id | MSTRG.3334; |
| 1 StringTie exon      | 194028831 | 194030457 | . | + | . | transcript_MSTRG.3334.1;gene_id | MSTRG.3334; |
| 1 StringTie transcrip | 201333205 | 201334563 | . | + | . | transcript_MSTRG.3382.1;gene_id | MSTRG.3382; |
| 1 StringTie exon      | 201333205 | 201333911 | . | + | . | transcript_MSTRG.3382.1;gene_id | MSTRG.3382; |
| 1 StringTie exon      | 201334495 | 201334563 | . | + | . | transcript_MSTRG.3382.1;gene_id | MSTRG.3382; |
| 1 StringTie transcrip | 201353695 | 201410891 | . | + | . | transcript_MSTRG.3385.1;gene_id | MSTRG.3385; |
| 1 StringTie exon      | 201353695 | 201353845 | . | + | . | transcript_MSTRG.3385.1;gene_id | MSTRG.3385; |
| 1 StringTie exon      | 201407640 | 201407764 | . | + | . | transcript_MSTRG.3385.1;gene_id | MSTRG.3385; |
| 1 StringTie exon      | 201409087 | 201409149 | . | + | . | transcript_MSTRG.3385.1;gene_id | MSTRG.3385; |
| 1 StringTie exon      | 201410660 | 201410891 | . | + | . | transcript_MSTRG.3385.1;gene_id | MSTRG.3385; |
| 1 StringTie transcrip | 201356660 | 201369854 | . | + | . | transcript_MSTRG.3387.1;gene_id | MSTRG.3387; |
| 1 StringTie exon      | 201356660 | 201356916 | . | + | . | transcript_MSTRG.3387.1;gene_id | MSTRG.3387; |
| 1 StringTie exon      | 201367581 | 201368800 | . | + | . | transcript_MSTRG.3387.1;gene_id | MSTRG.3387; |
| 1 StringTie exon      | 201369785 | 201369854 | . | + | . | transcript_MSTRG.3387.1;gene_id | MSTRG.3387; |
| 1 StringTie transcrip | 201413086 | 201476397 | . | + | . | transcript_MSTRG.3401.1;gene_id | MSTRG.3401; |
| 1 StringTie exon      | 201413086 | 201413190 | . | + | . | transcript_MSTRG.3401.1;gene_id | MSTRG.3401; |
| 1 StringTie exon      | 201426390 | 201426491 | . | + | . | transcript_MSTRG.3401.1;gene_id | MSTRG.3401; |
| 1 StringTie exon      | 201475715 | 201475999 | . | + | . | transcript_MSTRG.3401.1;gene_id | MSTRG.3401; |
| 1 StringTie exon      | 201476161 | 201476397 | . | + | . | transcript_MSTRG.3401.1;gene_id | MSTRG.3401; |
| 1 StringTie transcrip | 201443402 | 201456551 | . | + | . | transcript_MSTRG.3404.1;gene_id | MSTRG.3404; |
| 1 StringTie exon      | 201443402 | 201443727 | . | + | . | transcript_MSTRG.3404.1;gene_id | MSTRG.3404; |

|                        |           |           |   |   |   |                                 |             |
|------------------------|-----------|-----------|---|---|---|---------------------------------|-------------|
| 1 StringTie exon       | 201443889 | 201444122 | . | + | . | transcript_MSTRG.3404.1;gene_id | MSTRG.3404; |
| 1 StringTie exon       | 201456463 | 201456551 | . | + | . | transcript_MSTRG.3404.1;gene_id | MSTRG.3404; |
| 1 StringTie transcript | 201445623 | 201456551 | . | + | . | transcript_MSTRG.3404.2;gene_id | MSTRG.3404; |
| 1 StringTie exon       | 201445623 | 201445736 | . | + | . | transcript_MSTRG.3404.2;gene_id | MSTRG.3404; |
| 1 StringTie exon       | 201456463 | 201456551 | . | + | . | transcript_MSTRG.3404.2;gene_id | MSTRG.3404; |
| 1 StringTie transcript | 201515945 | 201532745 | . | + | . | transcript_MSTRG.3410.1;gene_id | MSTRG.3410; |
| 1 StringTie exon       | 201515945 | 201515986 | . | + | . | transcript_MSTRG.3410.1;gene_id | MSTRG.3410; |
| 1 StringTie exon       | 201531010 | 201532745 | . | + | . | transcript_MSTRG.3410.1;gene_id | MSTRG.3410; |
| 1 StringTie transcript | 204383966 | 204413141 | . | + | . | transcript_MSTRG.3367.1;gene_id | MSTRG.3367; |
| 1 StringTie exon       | 204383966 | 204384122 | . | + | . | transcript_MSTRG.3367.1;gene_id | MSTRG.3367; |
| 1 StringTie exon       | 204412573 | 204413141 | . | + | . | transcript_MSTRG.3367.1;gene_id | MSTRG.3367; |
| 1 StringTie transcript | 208987016 | 209047433 | . | + | . | transcript_MSTRG.3505.3;gene_id | MSTRG.3505; |
| 1 StringTie exon       | 208987016 | 208987753 | . | + | . | transcript_MSTRG.3505.3;gene_id | MSTRG.3505; |
| 1 StringTie exon       | 209047213 | 209047433 | . | + | . | transcript_MSTRG.3505.3;gene_id | MSTRG.3505; |
| 1 StringTie transcript | 215807873 | 215978560 | . | + | . | transcript_MSTRG.3528.1;gene_id | MSTRG.3528; |
| 1 StringTie exon       | 215807873 | 215807961 | . | + | . | transcript_MSTRG.3528.1;gene_id | MSTRG.3528; |
| 1 StringTie exon       | 215811039 | 215811177 | . | + | . | transcript_MSTRG.3528.1;gene_id | MSTRG.3528; |
| 1 StringTie exon       | 215975867 | 215975975 | . | + | . | transcript_MSTRG.3528.1;gene_id | MSTRG.3528; |
| 1 StringTie exon       | 215978357 | 215978560 | . | + | . | transcript_MSTRG.3528.1;gene_id | MSTRG.3528; |
| 1 StringTie transcript | 222432517 | 222434362 | . | + | . | transcript_MSTRG.3698.5;gene_id | MSTRG.3698; |
| 1 StringTie exon       | 222432517 | 222432542 | . | + | . | transcript_MSTRG.3698.5;gene_id | MSTRG.3698; |
| 1 StringTie exon       | 222433248 | 222434362 | . | + | . | transcript_MSTRG.3698.5;gene_id | MSTRG.3698; |
| 1 StringTie transcript | 230312271 | 230316662 | . | + | . | transcript_MSTRG.3858.8;gene_id | MSTRG.3858; |
| 1 StringTie exon       | 230312271 | 230312438 | . | + | . | transcript_MSTRG.3858.8;gene_id | MSTRG.3858; |
| 1 StringTie exon       | 230316589 | 230316662 | . | + | . | transcript_MSTRG.3858.8;gene_id | MSTRG.3858; |
| 1 StringTie transcript | 235877498 | 235877821 | . | + | . | transcript_MSTRG.3882.1;gene_id | MSTRG.3882; |
| 1 StringTie exon       | 235877498 | 235877609 | . | + | . | transcript_MSTRG.3882.1;gene_id | MSTRG.3882; |
| 1 StringTie exon       | 235877722 | 235877821 | . | + | . | transcript_MSTRG.3882.1;gene_id | MSTRG.3882; |
| 1 StringTie transcript | 246728843 | 246753303 | . | + | . | transcript_MSTRG.4065.1;gene_id | MSTRG.4065; |
| 1 StringTie exon       | 246728843 | 246729077 | . | + | . | transcript_MSTRG.4065.1;gene_id | MSTRG.4065; |
| 1 StringTie exon       | 246753209 | 246753303 | . | + | . | transcript_MSTRG.4065.1;gene_id | MSTRG.4065; |
| 1 StringTie transcript | 250079982 | 250095437 | . | + | . | transcript_MSTRG.4136.1;gene_id | MSTRG.4136; |
| 1 StringTie exon       | 250079982 | 250080079 | . | + | . | transcript_MSTRG.4136.1;gene_id | MSTRG.4136; |
| 1 StringTie exon       | 250088692 | 250088836 | . | + | . | transcript_MSTRG.4136.1;gene_id | MSTRG.4136; |
| 1 StringTie exon       | 250089274 | 250089314 | . | + | . | transcript_MSTRG.4136.1;gene_id | MSTRG.4136; |

|                       |           |           |   |   |   |                                 |             |
|-----------------------|-----------|-----------|---|---|---|---------------------------------|-------------|
| 1 StringTie exon      | 250095025 | 250095437 | . | + | . | transcript_MSTRG.4136.1;gene_id | MSTRG.4136; |
| 1 StringTie transcrip | 250123047 | 250123714 | . | + | . | transcript_MSTRG.4138.1;gene_id | MSTRG.4138; |
| 1 StringTie exon      | 250123047 | 250123482 | . | + | . | transcript_MSTRG.4138.1;gene_id | MSTRG.4138; |
| 1 StringTie exon      | 250123682 | 250123714 | . | + | . | transcript_MSTRG.4138.1;gene_id | MSTRG.4138; |
| 1 StringTie transcrip | 251208475 | 251231319 | . | + | . | transcript_MSTRG.4144.2;gene_id | MSTRG.4144; |
| 1 StringTie exon      | 251208475 | 251208918 | . | + | . | transcript_MSTRG.4144.2;gene_id | MSTRG.4144; |
| 1 StringTie exon      | 251231270 | 251231319 | . | + | . | transcript_MSTRG.4144.2;gene_id | MSTRG.4144; |
| 1 StringTie transcrip | 251208496 | 251239363 | . | + | . | transcript_MSTRG.4144.3;gene_id | MSTRG.4144; |
| 1 StringTie exon      | 251208496 | 251208814 | . | + | . | transcript_MSTRG.4144.3;gene_id | MSTRG.4144; |
| 1 StringTie exon      | 251239097 | 251239363 | . | + | . | transcript_MSTRG.4144.3;gene_id | MSTRG.4144; |
| 1 StringTie transcrip | 251208714 | 251266306 | . | + | . | transcript_MSTRG.4144.4;gene_id | MSTRG.4144; |
| 1 StringTie exon      | 251208714 | 251208814 | . | + | . | transcript_MSTRG.4144.4;gene_id | MSTRG.4144; |
| 1 StringTie exon      | 251266174 | 251266306 | . | + | . | transcript_MSTRG.4144.4;gene_id | MSTRG.4144; |
| 1 StringTie transcrip | 251799819 | 251809910 | . | + | . | transcript_MSTRG.4160.1;gene_id | MSTRG.4160; |
| 1 StringTie exon      | 251799819 | 251800103 | . | + | . | transcript_MSTRG.4160.1;gene_id | MSTRG.4160; |
| 1 StringTie exon      | 251800700 | 251809910 | . | + | . | transcript_MSTRG.4160.1;gene_id | MSTRG.4160; |
| 1 StringTie transcrip | 252420661 | 252424771 | . | + | . | transcript_MSTRG.4187.1;gene_id | MSTRG.4187; |
| 1 StringTie exon      | 252420661 | 252420743 | . | + | . | transcript_MSTRG.4187.1;gene_id | MSTRG.4187; |
| 1 StringTie exon      | 252424256 | 252424771 | . | + | . | transcript_MSTRG.4187.1;gene_id | MSTRG.4187; |
| 1 StringTie transcrip | 260885894 | 260908471 | . | + | . | transcript_MSTRG.4274.1;gene_id | MSTRG.4274; |
| 1 StringTie exon      | 260885894 | 260885997 | . | + | . | transcript_MSTRG.4274.1;gene_id | MSTRG.4274; |
| 1 StringTie exon      | 260907279 | 260908471 | . | + | . | transcript_MSTRG.4274.1;gene_id | MSTRG.4274; |
| 1 StringTie transcrip | 261659720 | 261664181 | . | + | . | transcript_MSTRG.4300.4;gene_id | MSTRG.4300; |
| 1 StringTie exon      | 261659720 | 261659925 | . | + | . | transcript_MSTRG.4300.4;gene_id | MSTRG.4300; |
| 1 StringTie exon      | 261662504 | 261662627 | . | + | . | transcript_MSTRG.4300.4;gene_id | MSTRG.4300; |
| 1 StringTie exon      | 261664146 | 261664181 | . | + | . | transcript_MSTRG.4300.4;gene_id | MSTRG.4300; |
| 1 StringTie transcrip | 261968018 | 262007870 | . | + | . | transcript_MSTRG.4302.1;gene_id | MSTRG.4302; |
| 1 StringTie exon      | 261968018 | 261968126 | . | + | . | transcript_MSTRG.4302.1;gene_id | MSTRG.4302; |
| 1 StringTie exon      | 262007715 | 262007870 | . | + | . | transcript_MSTRG.4302.1;gene_id | MSTRG.4302; |
| 1 StringTie transcrip | 262047548 | 262078520 | . | + | . | transcript_MSTRG.4303.1;gene_id | MSTRG.4303; |
| 1 StringTie exon      | 262047548 | 262047567 | . | + | . | transcript_MSTRG.4303.1;gene_id | MSTRG.4303; |
| 1 StringTie exon      | 262077897 | 262078520 | . | + | . | transcript_MSTRG.4303.1;gene_id | MSTRG.4303; |
| 1 StringTie transcrip | 263759621 | 263767178 | . | + | . | transcript_MSTRG.4324.1;gene_id | MSTRG.4324; |
| 1 StringTie exon      | 263759621 | 263760281 | . | + | . | transcript_MSTRG.4324.1;gene_id | MSTRG.4324; |
| 1 StringTie exon      | 263766681 | 263767178 | . | + | . | transcript_MSTRG.4324.1;gene_id | MSTRG.4324; |

|                        |           |           |   |   |   |                                 |             |
|------------------------|-----------|-----------|---|---|---|---------------------------------|-------------|
| 1 StringTie transcript | 263759625 | 263767096 | . | + | . | transcript_MSTRG.4324.2;gene_id | MSTRG.4324; |
| 1 StringTie exon       | 263759625 | 263759997 | . | + | . | transcript_MSTRG.4324.2;gene_id | MSTRG.4324; |
| 1 StringTie exon       | 263766681 | 263767096 | . | + | . | transcript_MSTRG.4324.2;gene_id | MSTRG.4324; |
| 1 StringTie transcript | 264223414 | 264237738 | . | + | . | transcript_MSTRG.4329.1;gene_id | MSTRG.4329; |
| 1 StringTie exon       | 264223414 | 264223643 | . | + | . | transcript_MSTRG.4329.1;gene_id | MSTRG.4329; |
| 1 StringTie exon       | 264228418 | 264228767 | . | + | . | transcript_MSTRG.4329.1;gene_id | MSTRG.4329; |
| 1 StringTie exon       | 264230952 | 264231139 | . | + | . | transcript_MSTRG.4329.1;gene_id | MSTRG.4329; |
| 1 StringTie exon       | 264237266 | 264237738 | . | + | . | transcript_MSTRG.4329.1;gene_id | MSTRG.4329; |
| 1 StringTie transcript | 265461746 | 265493963 | . | + | . | transcript_MSTRG.4347.1;gene_id | MSTRG.4347; |
| 1 StringTie exon       | 265461746 | 265461958 | . | + | . | transcript_MSTRG.4347.1;gene_id | MSTRG.4347; |
| 1 StringTie exon       | 265493859 | 265493963 | . | + | . | transcript_MSTRG.4347.1;gene_id | MSTRG.4347; |
| 1 StringTie transcript | 269122224 | 269123090 | . | + | . | transcript_MSTRG.4476.1;gene_id | MSTRG.4476; |
| 1 StringTie exon       | 269122224 | 269122289 | . | + | . | transcript_MSTRG.4476.1;gene_id | MSTRG.4476; |
| 1 StringTie exon       | 269122574 | 269122639 | . | + | . | transcript_MSTRG.4476.1;gene_id | MSTRG.4476; |
| 1 StringTie exon       | 269122766 | 269123090 | . | + | . | transcript_MSTRG.4476.1;gene_id | MSTRG.4476; |
| 1 StringTie transcript | 269575544 | 269586378 | . | + | . | transcript_MSTRG.4485.1;gene_id | MSTRG.4485; |
| 1 StringTie exon       | 269575544 | 269575624 | . | + | . | transcript_MSTRG.4485.1;gene_id | MSTRG.4485; |
| 1 StringTie exon       | 269583521 | 269583665 | . | + | . | transcript_MSTRG.4485.1;gene_id | MSTRG.4485; |
| 1 StringTie exon       | 269586036 | 269586378 | . | + | . | transcript_MSTRG.4485.1;gene_id | MSTRG.4485; |
| 1 StringTie transcript | 269582356 | 269586366 | . | + | . | transcript_MSTRG.4485.2;gene_id | MSTRG.4485; |
| 1 StringTie exon       | 269582356 | 269582676 | . | + | . | transcript_MSTRG.4485.2;gene_id | MSTRG.4485; |
| 1 StringTie exon       | 269583521 | 269583665 | . | + | . | transcript_MSTRG.4485.2;gene_id | MSTRG.4485; |
| 1 StringTie exon       | 269586036 | 269586366 | . | + | . | transcript_MSTRG.4485.2;gene_id | MSTRG.4485; |
| 1 StringTie transcript | 270180487 | 270182683 | . | + | . | transcript_MSTRG.4510.1;gene_id | MSTRG.4510; |
| 1 StringTie exon       | 270180487 | 270181074 | . | + | . | transcript_MSTRG.4510.1;gene_id | MSTRG.4510; |
| 1 StringTie exon       | 270182034 | 270182683 | . | + | . | transcript_MSTRG.4510.1;gene_id | MSTRG.4510; |
| 1 StringTie transcript | 271275822 | 271277382 | . | + | . | transcript_MSTRG.4536.1;gene_id | MSTRG.4536; |
| 1 StringTie exon       | 271275822 | 271277091 | . | + | . | transcript_MSTRG.4536.1;gene_id | MSTRG.4536; |
| 1 StringTie exon       | 271277112 | 271277382 | . | + | . | transcript_MSTRG.4536.1;gene_id | MSTRG.4536; |
| 1 StringTie transcript | 273945827 | 273947258 | . | + | . | transcript_MSTRG.4619.1;gene_id | MSTRG.4619; |
| 1 StringTie exon       | 273945827 | 273946064 | . | + | . | transcript_MSTRG.4619.1;gene_id | MSTRG.4619; |
| 1 StringTie exon       | 273947072 | 273947258 | . | + | . | transcript_MSTRG.4619.1;gene_id | MSTRG.4619; |
| 1 StringTie transcript | 2524141   | 2533607   | . | - | . | transcript_MSTRG.70.1; gene_id  | MSTRG.70;   |
| 1 StringTie exon       | 2524141   | 2526864   | . | - | . | transcript_MSTRG.70.1; gene_id  | MSTRG.70;   |
| 1 StringTie exon       | 2529712   | 2529809   | . | - | . | transcript_MSTRG.70.1; gene_id  | MSTRG.70;   |



|                       |          |            |     |                                            |
|-----------------------|----------|------------|-----|--------------------------------------------|
| 1 StringTie exon      | 2533117  | 2533607 .  | - . | transcript_MSTRG.70.1; gene_id MSTRG.70;   |
| 1 StringTie transcrip | 2536267  | 2537315 .  | - . | transcript_MSTRG.69.1; gene_id MSTRG.69;   |
| 1 StringTie exon      | 2536267  | 2536434 .  | - . | transcript_MSTRG.69.1; gene_id MSTRG.69;   |
| 1 StringTie exon      | 2537130  | 2537315 .  | - . | transcript_MSTRG.69.1; gene_id MSTRG.69;   |
| 1 StringTie transcrip | 8033665  | 8036831 .  | - . | transcript_MSTRG.151.1; gene_id MSTRG.151; |
| 1 StringTie exon      | 8033665  | 8034235 .  | - . | transcript_MSTRG.151.1; gene_id MSTRG.151; |
| 1 StringTie exon      | 8036528  | 8036831 .  | - . | transcript_MSTRG.151.1; gene_id MSTRG.151; |
| 1 StringTie transcrip | 11888123 | 11892164 . | - . | transcript_MSTRG.222.2; gene_id MSTRG.222; |
| 1 StringTie exon      | 11888123 | 11888352 . | - . | transcript_MSTRG.222.2; gene_id MSTRG.222; |
| 1 StringTie exon      | 11892124 | 11892164 . | - . | transcript_MSTRG.222.2; gene_id MSTRG.222; |
| 1 StringTie transcrip | 12005086 | 12006916 . | - . | transcript_MSTRG.223.1; gene_id MSTRG.223; |
| 1 StringTie exon      | 12005086 | 12005684 . | - . | transcript_MSTRG.223.1; gene_id MSTRG.223; |
| 1 StringTie exon      | 12005963 | 12006916 . | - . | transcript_MSTRG.223.1; gene_id MSTRG.223; |
| 1 StringTie transcrip | 14147059 | 14151522 . | - . | transcript_MSTRG.272.1; gene_id MSTRG.272; |
| 1 StringTie exon      | 14147059 | 14149215 . | - . | transcript_MSTRG.272.1; gene_id MSTRG.272; |
| 1 StringTie exon      | 14149708 | 14149767 . | - . | transcript_MSTRG.272.1; gene_id MSTRG.272; |
| 1 StringTie exon      | 14151033 | 14151522 . | - . | transcript_MSTRG.272.1; gene_id MSTRG.272; |
| 1 StringTie transcrip | 14147221 | 14151413 . | - . | transcript_MSTRG.272.3; gene_id MSTRG.272; |
| 1 StringTie exon      | 14147221 | 14147918 . | - . | transcript_MSTRG.272.3; gene_id MSTRG.272; |
| 1 StringTie exon      | 14149708 | 14149767 . | - . | transcript_MSTRG.272.3; gene_id MSTRG.272; |
| 1 StringTie exon      | 14151033 | 14151413 . | - . | transcript_MSTRG.272.3; gene_id MSTRG.272; |
| 1 StringTie transcrip | 14147221 | 14151522 . | - . | transcript_MSTRG.272.2; gene_id MSTRG.272; |
| 1 StringTie exon      | 14147221 | 14149215 . | - . | transcript_MSTRG.272.2; gene_id MSTRG.272; |
| 1 StringTie exon      | 14149708 | 14149767 . | - . | transcript_MSTRG.272.2; gene_id MSTRG.272; |
| 1 StringTie exon      | 14151033 | 14151174 . | - . | transcript_MSTRG.272.2; gene_id MSTRG.272; |
| 1 StringTie exon      | 14151435 | 14151522 . | - . | transcript_MSTRG.272.2; gene_id MSTRG.272; |
| 1 StringTie transcrip | 14148317 | 14151262 . | - . | transcript_MSTRG.272.4; gene_id MSTRG.272; |
| 1 StringTie exon      | 14148317 | 14149215 . | - . | transcript_MSTRG.272.4; gene_id MSTRG.272; |
| 1 StringTie exon      | 14149551 | 14149767 . | - . | transcript_MSTRG.272.4; gene_id MSTRG.272; |
| 1 StringTie exon      | 14151033 | 14151262 . | - . | transcript_MSTRG.272.4; gene_id MSTRG.272; |
| 1 StringTie transcrip | 16672136 | 16673285 . | - . | transcript_MSTRG.300.1; gene_id MSTRG.300; |
| 1 StringTie exon      | 16672136 | 16672449 . | - . | transcript_MSTRG.300.1; gene_id MSTRG.300; |
| 1 StringTie exon      | 16672783 | 16673285 . | - . | transcript_MSTRG.300.1; gene_id MSTRG.300; |
| 1 StringTie transcrip | 16673789 | 16681500 . | - . | transcript_MSTRG.301.1; gene_id MSTRG.301; |
| 1 StringTie exon      | 16673789 | 16674208 . | - . | transcript_MSTRG.301.1; gene_id MSTRG.301; |

|                       |          |          |   |   |   |                                            |
|-----------------------|----------|----------|---|---|---|--------------------------------------------|
| 1 StringTie exon      | 16681212 | 16681500 | . | - | . | transcript_MSTRG.301.1; gene_id MSTRG.301; |
| 1 StringTie transcrip | 19604497 | 19609799 | . | - | . | transcript_MSTRG.365.1; gene_id MSTRG.365; |
| 1 StringTie exon      | 19604497 | 19604797 | . | - | . | transcript_MSTRG.365.1; gene_id MSTRG.365; |
| 1 StringTie exon      | 19609752 | 19609799 | . | - | . | transcript_MSTRG.365.1; gene_id MSTRG.365; |
| 1 StringTie transcrip | 19715330 | 19755683 | . | - | . | transcript_MSTRG.409.1; gene_id MSTRG.409; |
| 1 StringTie exon      | 19715330 | 19716480 | . | - | . | transcript_MSTRG.409.1; gene_id MSTRG.409; |
| 1 StringTie exon      | 19749271 | 19749343 | . | - | . | transcript_MSTRG.409.1; gene_id MSTRG.409; |
| 1 StringTie exon      | 19755449 | 19755683 | . | - | . | transcript_MSTRG.409.1; gene_id MSTRG.409; |
| 1 StringTie transcrip | 19730146 | 19755694 | . | - | . | transcript_MSTRG.409.2; gene_id MSTRG.409; |
| 1 StringTie exon      | 19730146 | 19732605 | . | - | . | transcript_MSTRG.409.2; gene_id MSTRG.409; |
| 1 StringTie exon      | 19749271 | 19749343 | . | - | . | transcript_MSTRG.409.2; gene_id MSTRG.409; |
| 1 StringTie exon      | 19755449 | 19755694 | . | - | . | transcript_MSTRG.409.2; gene_id MSTRG.409; |
| 1 StringTie transcrip | 21074052 | 21096341 | . | - | . | transcript_MSTRG.431.1; gene_id MSTRG.431; |
| 1 StringTie exon      | 21074052 | 21074094 | . | - | . | transcript_MSTRG.431.1; gene_id MSTRG.431; |
| 1 StringTie exon      | 21096098 | 21096341 | . | - | . | transcript_MSTRG.431.1; gene_id MSTRG.431; |
| 1 StringTie transcrip | 27038091 | 27038888 | . | - | . | transcript_MSTRG.550.1; gene_id MSTRG.550; |
| 1 StringTie exon      | 27038091 | 27038543 | . | - | . | transcript_MSTRG.550.1; gene_id MSTRG.550; |
| 1 StringTie exon      | 27038842 | 27038888 | . | - | . | transcript_MSTRG.550.1; gene_id MSTRG.550; |
| 1 StringTie transcrip | 27869779 | 27871967 | . | - | . | transcript_MSTRG.562.1; gene_id MSTRG.562; |
| 1 StringTie exon      | 27869779 | 27871967 | . | - | . | transcript_MSTRG.562.1; gene_id MSTRG.562; |
| 1 StringTie transcrip | 27869873 | 27871954 | . | - | . | transcript_MSTRG.562.2; gene_id MSTRG.562; |
| 1 StringTie exon      | 27869873 | 27871143 | . | - | . | transcript_MSTRG.562.2; gene_id MSTRG.562; |
| 1 StringTie exon      | 27871868 | 27871954 | . | - | . | transcript_MSTRG.562.2; gene_id MSTRG.562; |
| 1 StringTie transcrip | 27934552 | 27941372 | . | - | . | transcript_MSTRG.561.1; gene_id MSTRG.561; |
| 1 StringTie exon      | 27934552 | 27935309 | . | - | . | transcript_MSTRG.561.1; gene_id MSTRG.561; |
| 1 StringTie exon      | 27940830 | 27941372 | . | - | . | transcript_MSTRG.561.1; gene_id MSTRG.561; |
| 1 StringTie transcrip | 32586203 | 32590452 | . | - | . | transcript_MSTRG.680.1; gene_id MSTRG.680; |
| 1 StringTie exon      | 32586203 | 32586979 | . | - | . | transcript_MSTRG.680.1; gene_id MSTRG.680; |
| 1 StringTie exon      | 32587036 | 32590452 | . | - | . | transcript_MSTRG.680.1; gene_id MSTRG.680; |
| 1 StringTie transcrip | 37199519 | 37203528 | . | - | . | transcript_MSTRG.738.1; gene_id MSTRG.738; |
| 1 StringTie exon      | 37199519 | 37201456 | . | - | . | transcript_MSTRG.738.1; gene_id MSTRG.738; |
| 1 StringTie exon      | 37201932 | 37203528 | . | - | . | transcript_MSTRG.738.1; gene_id MSTRG.738; |
| 1 StringTie transcrip | 37201244 | 37203502 | . | - | . | transcript_MSTRG.738.2; gene_id MSTRG.738; |
| 1 StringTie exon      | 37201244 | 37203502 | . | - | . | transcript_MSTRG.738.2; gene_id MSTRG.738; |
| 1 StringTie transcrip | 37201963 | 37203078 | . | - | . | transcript_MSTRG.738.3; gene_id MSTRG.738; |

|                        |           |           |   |   |   |                                  |             |
|------------------------|-----------|-----------|---|---|---|----------------------------------|-------------|
| 1 StringTie exon       | 37201963  | 37202039  | . | - | . | transcript_MSTRG.738.3; gene_id  | MSTRG.738;  |
| 1 StringTie exon       | 37202629  | 37203078  | . | - | . | transcript_MSTRG.738.3; gene_id  | MSTRG.738;  |
| 1 StringTie transcript | 66413113  | 66467841  | . | - | . | transcript_MSTRG.1179.1; gene_id | MSTRG.1179; |
| 1 StringTie exon       | 66413113  | 66413253  | . | - | . | transcript_MSTRG.1179.1; gene_id | MSTRG.1179; |
| 1 StringTie exon       | 66467167  | 66467841  | . | - | . | transcript_MSTRG.1179.1; gene_id | MSTRG.1179; |
| 1 StringTie transcript | 107150274 | 107154150 | . | - | . | transcript_MSTRG.1652.4; gene_id | MSTRG.1652; |
| 1 StringTie exon       | 107150274 | 107150369 | . | - | . | transcript_MSTRG.1652.4; gene_id | MSTRG.1652; |
| 1 StringTie exon       | 107153928 | 107154150 | . | - | . | transcript_MSTRG.1652.4; gene_id | MSTRG.1652; |
| 1 StringTie transcript | 107329727 | 107413900 | . | - | . | transcript_MSTRG.1664.1; gene_id | MSTRG.1664; |
| 1 StringTie exon       | 107329727 | 107331699 | . | - | . | transcript_MSTRG.1664.1; gene_id | MSTRG.1664; |
| 1 StringTie exon       | 107380468 | 107380500 | . | - | . | transcript_MSTRG.1664.1; gene_id | MSTRG.1664; |
| 1 StringTie exon       | 107413441 | 107413900 | . | - | . | transcript_MSTRG.1664.1; gene_id | MSTRG.1664; |
| 1 StringTie transcript | 111536129 | 111536916 | . | - | . | transcript_MSTRG.1839.1; gene_id | MSTRG.1839; |
| 1 StringTie exon       | 111536129 | 111536341 | . | - | . | transcript_MSTRG.1839.1; gene_id | MSTRG.1839; |
| 1 StringTie exon       | 111536645 | 111536916 | . | - | . | transcript_MSTRG.1839.1; gene_id | MSTRG.1839; |
| 1 StringTie transcript | 115696817 | 115734764 | . | - | . | transcript_MSTRG.1935.1; gene_id | MSTRG.1935; |
| 1 StringTie exon       | 115696817 | 115702479 | . | - | . | transcript_MSTRG.1935.1; gene_id | MSTRG.1935; |
| 1 StringTie exon       | 115732322 | 115732439 | . | - | . | transcript_MSTRG.1935.1; gene_id | MSTRG.1935; |
| 1 StringTie exon       | 115733876 | 115733962 | . | - | . | transcript_MSTRG.1935.1; gene_id | MSTRG.1935; |
| 1 StringTie exon       | 115734744 | 115734764 | . | - | . | transcript_MSTRG.1935.1; gene_id | MSTRG.1935; |
| 1 StringTie transcript | 115699004 | 115734635 | . | - | . | transcript_MSTRG.1935.2; gene_id | MSTRG.1935; |
| 1 StringTie exon       | 115699004 | 115702479 | . | - | . | transcript_MSTRG.1935.2; gene_id | MSTRG.1935; |
| 1 StringTie exon       | 115732322 | 115732439 | . | - | . | transcript_MSTRG.1935.2; gene_id | MSTRG.1935; |
| 1 StringTie exon       | 115733876 | 115733962 | . | - | . | transcript_MSTRG.1935.2; gene_id | MSTRG.1935; |
| 1 StringTie exon       | 115734614 | 115734635 | . | - | . | transcript_MSTRG.1935.2; gene_id | MSTRG.1935; |
| 1 StringTie transcript | 115724386 | 115726541 | . | - | . | transcript_MSTRG.1936.1; gene_id | MSTRG.1936; |
| 1 StringTie exon       | 115724386 | 115725368 | . | - | . | transcript_MSTRG.1936.1; gene_id | MSTRG.1936; |
| 1 StringTie exon       | 115726360 | 115726541 | . | - | . | transcript_MSTRG.1936.1; gene_id | MSTRG.1936; |
| 1 StringTie transcript | 116253878 | 116258079 | . | - | . | transcript_MSTRG.1942.1; gene_id | MSTRG.1942; |
| 1 StringTie exon       | 116253878 | 116254269 | . | - | . | transcript_MSTRG.1942.1; gene_id | MSTRG.1942; |
| 1 StringTie exon       | 116257961 | 116258079 | . | - | . | transcript_MSTRG.1942.1; gene_id | MSTRG.1942; |
| 1 StringTie transcript | 129179532 | 129197491 | . | - | . | transcript_MSTRG.2164.1; gene_id | MSTRG.2164; |
| 1 StringTie exon       | 129179532 | 129179902 | . | - | . | transcript_MSTRG.2164.1; gene_id | MSTRG.2164; |
| 1 StringTie exon       | 129197383 | 129197491 | . | - | . | transcript_MSTRG.2164.1; gene_id | MSTRG.2164; |
| 1 StringTie transcript | 138326669 | 138419657 | . | - | . | transcript_MSTRG.2476.1; gene_id | MSTRG.2476; |

|                       |           |           |   |   |   |                                 |             |
|-----------------------|-----------|-----------|---|---|---|---------------------------------|-------------|
| 1 StringTie exon      | 138326669 | 138326686 | . | - | . | transcript_MSTRG.2476.1;gene_id | MSTRG.2476; |
| 1 StringTie exon      | 138419316 | 138419657 | . | - | . | transcript_MSTRG.2476.1;gene_id | MSTRG.2476; |
| 1 StringTie transcrip | 142080325 | 142088686 | . | - | . | transcript_MSTRG.2517.1;gene_id | MSTRG.2517; |
| 1 StringTie exon      | 142080325 | 142081829 | . | - | . | transcript_MSTRG.2517.1;gene_id | MSTRG.2517; |
| 1 StringTie exon      | 142082543 | 142082655 | . | - | . | transcript_MSTRG.2517.1;gene_id | MSTRG.2517; |
| 1 StringTie exon      | 142083412 | 142083540 | . | - | . | transcript_MSTRG.2517.1;gene_id | MSTRG.2517; |
| 1 StringTie exon      | 142088477 | 142088686 | . | - | . | transcript_MSTRG.2517.1;gene_id | MSTRG.2517; |
| 1 StringTie transcrip | 148795900 | 148799867 | . | - | . | transcript_MSTRG.2582.1;gene_id | MSTRG.2582; |
| 1 StringTie exon      | 148795900 | 148798629 | . | - | . | transcript_MSTRG.2582.1;gene_id | MSTRG.2582; |
| 1 StringTie exon      | 148799843 | 148799867 | . | - | . | transcript_MSTRG.2582.1;gene_id | MSTRG.2582; |
| 1 StringTie transcrip | 148799901 | 148801066 | . | - | . | transcript_MSTRG.2583.1;gene_id | MSTRG.2583; |
| 1 StringTie exon      | 148799901 | 148799984 | . | - | . | transcript_MSTRG.2583.1;gene_id | MSTRG.2583; |
| 1 StringTie exon      | 148800823 | 148801066 | . | - | . | transcript_MSTRG.2583.1;gene_id | MSTRG.2583; |
| 1 StringTie transcrip | 161817333 | 161818803 | . | - | . | transcript_MSTRG.2724.6;gene_id | MSTRG.2724; |
| 1 StringTie exon      | 161817333 | 161817804 | . | - | . | transcript_MSTRG.2724.6;gene_id | MSTRG.2724; |
| 1 StringTie exon      | 161818736 | 161818803 | . | - | . | transcript_MSTRG.2724.6;gene_id | MSTRG.2724; |
| 1 StringTie transcrip | 162187306 | 162227446 | . | - | . | transcript_MSTRG.2734.1;gene_id | MSTRG.2734; |
| 1 StringTie exon      | 162187306 | 162187493 | . | - | . | transcript_MSTRG.2734.1;gene_id | MSTRG.2734; |
| 1 StringTie exon      | 162192951 | 162193054 | . | - | . | transcript_MSTRG.2734.1;gene_id | MSTRG.2734; |
| 1 StringTie exon      | 162220720 | 162220828 | . | - | . | transcript_MSTRG.2734.1;gene_id | MSTRG.2734; |
| 1 StringTie exon      | 162227250 | 162227446 | . | - | . | transcript_MSTRG.2734.1;gene_id | MSTRG.2734; |
| 1 StringTie transcrip | 162216337 | 162223765 | . | - | . | transcript_MSTRG.2734.3;gene_id | MSTRG.2734; |
| 1 StringTie exon      | 162216337 | 162220828 | . | - | . | transcript_MSTRG.2734.3;gene_id | MSTRG.2734; |
| 1 StringTie exon      | 162223101 | 162223238 | . | - | . | transcript_MSTRG.2734.3;gene_id | MSTRG.2734; |
| 1 StringTie exon      | 162223719 | 162223765 | . | - | . | transcript_MSTRG.2734.3;gene_id | MSTRG.2734; |
| 1 StringTie transcrip | 164282600 | 164285255 | . | - | . | transcript_MSTRG.2763.1;gene_id | MSTRG.2763; |
| 1 StringTie exon      | 164282600 | 164283843 | . | - | . | transcript_MSTRG.2763.1;gene_id | MSTRG.2763; |
| 1 StringTie exon      | 164285042 | 164285255 | . | - | . | transcript_MSTRG.2763.1;gene_id | MSTRG.2763; |
| 1 StringTie transcrip | 167277992 | 167295948 | . | - | . | transcript_MSTRG.2852.1;gene_id | MSTRG.2852; |
| 1 StringTie exon      | 167277992 | 167279174 | . | - | . | transcript_MSTRG.2852.1;gene_id | MSTRG.2852; |
| 1 StringTie exon      | 167279775 | 167279868 | . | - | . | transcript_MSTRG.2852.1;gene_id | MSTRG.2852; |
| 1 StringTie exon      | 167295586 | 167295948 | . | - | . | transcript_MSTRG.2852.1;gene_id | MSTRG.2852; |
| 1 StringTie transcrip | 184369412 | 184383161 | . | - | . | transcript_MSTRG.3097.1;gene_id | MSTRG.3097; |
| 1 StringTie exon      | 184369412 | 184369429 | . | - | . | transcript_MSTRG.3097.1;gene_id | MSTRG.3097; |
| 1 StringTie exon      | 184382710 | 184383161 | . | - | . | transcript_MSTRG.3097.1;gene_id | MSTRG.3097; |

|                        |           |           |   |   |   |                                 |             |
|------------------------|-----------|-----------|---|---|---|---------------------------------|-------------|
| 1 StringTie transcript | 186524327 | 186529664 | . | - | . | transcript_MSTRG.3130.1;gene_id | MSTRG.3130; |
| 1 StringTie exon       | 186524327 | 186524372 | . | - | . | transcript_MSTRG.3130.1;gene_id | MSTRG.3130; |
| 1 StringTie exon       | 186529198 | 186529664 | . | - | . | transcript_MSTRG.3130.1;gene_id | MSTRG.3130; |
| 1 StringTie transcript | 189283455 | 189394043 | . | - | . | transcript_MSTRG.3175.1;gene_id | MSTRG.3175; |
| 1 StringTie exon       | 189283455 | 189283515 | . | - | . | transcript_MSTRG.3175.1;gene_id | MSTRG.3175; |
| 1 StringTie exon       | 189331487 | 189331568 | . | - | . | transcript_MSTRG.3175.1;gene_id | MSTRG.3175; |
| 1 StringTie exon       | 189356804 | 189356842 | . | - | . | transcript_MSTRG.3175.1;gene_id | MSTRG.3175; |
| 1 StringTie exon       | 189357898 | 189358058 | . | - | . | transcript_MSTRG.3175.1;gene_id | MSTRG.3175; |
| 1 StringTie exon       | 189390621 | 189390679 | . | - | . | transcript_MSTRG.3175.1;gene_id | MSTRG.3175; |
| 1 StringTie exon       | 189391878 | 189391967 | . | - | . | transcript_MSTRG.3175.1;gene_id | MSTRG.3175; |
| 1 StringTie exon       | 189394013 | 189394043 | . | - | . | transcript_MSTRG.3175.1;gene_id | MSTRG.3175; |
| 1 StringTie transcript | 194324169 | 194352219 | . | - | . | transcript_MSTRG.3290.1;gene_id | MSTRG.3290; |
| 1 StringTie exon       | 194324169 | 194325525 | . | - | . | transcript_MSTRG.3290.1;gene_id | MSTRG.3290; |
| 1 StringTie exon       | 194334064 | 194334208 | . | - | . | transcript_MSTRG.3290.1;gene_id | MSTRG.3290; |
| 1 StringTie exon       | 194350597 | 194350729 | . | - | . | transcript_MSTRG.3290.1;gene_id | MSTRG.3290; |
| 1 StringTie exon       | 194352189 | 194352219 | . | - | . | transcript_MSTRG.3290.1;gene_id | MSTRG.3290; |
| 1 StringTie transcript | 194324824 | 194352294 | . | - | . | transcript_MSTRG.3290.2;gene_id | MSTRG.3290; |
| 1 StringTie exon       | 194324824 | 194325525 | . | - | . | transcript_MSTRG.3290.2;gene_id | MSTRG.3290; |
| 1 StringTie exon       | 194350597 | 194350729 | . | - | . | transcript_MSTRG.3290.2;gene_id | MSTRG.3290; |
| 1 StringTie exon       | 194352189 | 194352294 | . | - | . | transcript_MSTRG.3290.2;gene_id | MSTRG.3290; |
| 1 StringTie transcript | 201568442 | 201585218 | . | - | . | transcript_MSTRG.3413.1;gene_id | MSTRG.3413; |
| 1 StringTie exon       | 201568442 | 201568616 | . | - | . | transcript_MSTRG.3413.1;gene_id | MSTRG.3413; |
| 1 StringTie exon       | 201585127 | 201585218 | . | - | . | transcript_MSTRG.3413.1;gene_id | MSTRG.3413; |
| 1 StringTie transcript | 201655009 | 201656982 | . | - | . | transcript_MSTRG.3429.1;gene_id | MSTRG.3429; |
| 1 StringTie exon       | 201655009 | 201655057 | . | - | . | transcript_MSTRG.3429.1;gene_id | MSTRG.3429; |
| 1 StringTie exon       | 201655329 | 201655462 | . | - | . | transcript_MSTRG.3429.1;gene_id | MSTRG.3429; |
| 1 StringTie exon       | 201656907 | 201656982 | . | - | . | transcript_MSTRG.3429.1;gene_id | MSTRG.3429; |
| 1 StringTie transcript | 201668404 | 201771548 | . | - | . | transcript_MSTRG.3433.3;gene_id | MSTRG.3433; |
| 1 StringTie exon       | 201668404 | 201668807 | . | - | . | transcript_MSTRG.3433.3;gene_id | MSTRG.3433; |
| 1 StringTie exon       | 201675162 | 201675292 | . | - | . | transcript_MSTRG.3433.3;gene_id | MSTRG.3433; |
| 1 StringTie exon       | 201675661 | 201675919 | . | - | . | transcript_MSTRG.3433.3;gene_id | MSTRG.3433; |
| 1 StringTie exon       | 201735794 | 201735856 | . | - | . | transcript_MSTRG.3433.3;gene_id | MSTRG.3433; |
| 1 StringTie exon       | 201771448 | 201771548 | . | - | . | transcript_MSTRG.3433.3;gene_id | MSTRG.3433; |
| 1 StringTie transcript | 201675555 | 201678873 | . | - | . | transcript_MSTRG.3433.4;gene_id | MSTRG.3433; |
| 1 StringTie exon       | 201675555 | 201675919 | . | - | . | transcript_MSTRG.3433.4;gene_id | MSTRG.3433; |

|                        |           |           |   |   |   |                                 |             |
|------------------------|-----------|-----------|---|---|---|---------------------------------|-------------|
| 1 StringTie exon       | 201677438 | 201677500 | . | - | . | transcript_MSTRG.3433.4;gene_id | MSTRG.3433; |
| 1 StringTie exon       | 201678828 | 201678873 | . | - | . | transcript_MSTRG.3433.4;gene_id | MSTRG.3433; |
| 1 StringTie transcript | 201675689 | 201693386 | . | - | . | transcript_MSTRG.3433.5;gene_id | MSTRG.3433; |
| 1 StringTie exon       | 201675689 | 201675919 | . | - | . | transcript_MSTRG.3433.5;gene_id | MSTRG.3433; |
| 1 StringTie exon       | 201677438 | 201677500 | . | - | . | transcript_MSTRG.3433.5;gene_id | MSTRG.3433; |
| 1 StringTie exon       | 201693337 | 201693386 | . | - | . | transcript_MSTRG.3433.5;gene_id | MSTRG.3433; |
| 1 StringTie transcript | 203348141 | 203354890 | . | - | . | transcript_MSTRG.3339.1;gene_id | MSTRG.3339; |
| 1 StringTie exon       | 203348141 | 203348384 | . | - | . | transcript_MSTRG.3339.1;gene_id | MSTRG.3339; |
| 1 StringTie exon       | 203354747 | 203354890 | . | - | . | transcript_MSTRG.3339.1;gene_id | MSTRG.3339; |
| 1 StringTie transcript | 206362461 | 206381007 | . | - | . | transcript_MSTRG.3451.1;gene_id | MSTRG.3451; |
| 1 StringTie exon       | 206362461 | 206362477 | . | - | . | transcript_MSTRG.3451.1;gene_id | MSTRG.3451; |
| 1 StringTie exon       | 206377273 | 206381007 | . | - | . | transcript_MSTRG.3451.1;gene_id | MSTRG.3451; |
| 1 StringTie transcript | 216709163 | 216709966 | . | - | . | transcript_MSTRG.3569.1;gene_id | MSTRG.3569; |
| 1 StringTie exon       | 216709163 | 216709221 | . | - | . | transcript_MSTRG.3569.1;gene_id | MSTRG.3569; |
| 1 StringTie exon       | 216709774 | 216709966 | . | - | . | transcript_MSTRG.3569.1;gene_id | MSTRG.3569; |
| 1 StringTie transcript | 216729402 | 216736972 | . | - | . | transcript_MSTRG.3570.1;gene_id | MSTRG.3570; |
| 1 StringTie exon       | 216729402 | 216729758 | . | - | . | transcript_MSTRG.3570.1;gene_id | MSTRG.3570; |
| 1 StringTie exon       | 216736798 | 216736972 | . | - | . | transcript_MSTRG.3570.1;gene_id | MSTRG.3570; |
| 1 StringTie transcript | 229872022 | 229955692 | . | - | . | transcript_MSTRG.3832.1;gene_id | MSTRG.3832; |
| 1 StringTie exon       | 229872022 | 229873193 | . | - | . | transcript_MSTRG.3832.1;gene_id | MSTRG.3832; |
| 1 StringTie exon       | 229928721 | 229928855 | . | - | . | transcript_MSTRG.3832.1;gene_id | MSTRG.3832; |
| 1 StringTie exon       | 229952108 | 229952245 | . | - | . | transcript_MSTRG.3832.1;gene_id | MSTRG.3832; |
| 1 StringTie exon       | 229955621 | 229955692 | . | - | . | transcript_MSTRG.3832.1;gene_id | MSTRG.3832; |
| 1 StringTie transcript | 229872046 | 229952745 | . | - | . | transcript_MSTRG.3832.1;gene_id | MSTRG.3832; |
| 1 StringTie exon       | 229872046 | 229873193 | . | - | . | transcript_MSTRG.3832.1;gene_id | MSTRG.3832; |
| 1 StringTie exon       | 229928721 | 229928855 | . | - | . | transcript_MSTRG.3832.1;gene_id | MSTRG.3832; |
| 1 StringTie exon       | 229952108 | 229952245 | . | - | . | transcript_MSTRG.3832.1;gene_id | MSTRG.3832; |
| 1 StringTie exon       | 229952570 | 229952745 | . | - | . | transcript_MSTRG.3832.1;gene_id | MSTRG.3832; |
| 1 StringTie transcript | 241544999 | 241606079 | . | - | . | transcript_MSTRG.4017.1;gene_id | MSTRG.4017; |
| 1 StringTie exon       | 241544999 | 241545027 | . | - | . | transcript_MSTRG.4017.1;gene_id | MSTRG.4017; |
| 1 StringTie exon       | 241602720 | 241606079 | . | - | . | transcript_MSTRG.4017.1;gene_id | MSTRG.4017; |
| 1 StringTie transcript | 250001985 | 250003402 | . | - | . | transcript_MSTRG.4124.1;gene_id | MSTRG.4124; |
| 1 StringTie exon       | 250001985 | 250002507 | . | - | . | transcript_MSTRG.4124.1;gene_id | MSTRG.4124; |
| 1 StringTie exon       | 250002786 | 250003402 | . | - | . | transcript_MSTRG.4124.1;gene_id | MSTRG.4124; |
| 1 StringTie transcript | 252423032 | 252426375 | . | - | . | transcript_MSTRG.4188.1;gene_id | MSTRG.4188; |

|                        |           |           |   |   |   |                                 |             |
|------------------------|-----------|-----------|---|---|---|---------------------------------|-------------|
| 1 StringTie exon       | 252423032 | 252424600 | . | - | . | transcript_MSTRG.4188.1;gene_id | MSTRG.4188; |
| 1 StringTie exon       | 252425778 | 252426375 | . | - | . | transcript_MSTRG.4188.1;gene_id | MSTRG.4188; |
| 1 StringTie transcript | 267733051 | 267735085 | . | - | . | transcript_MSTRG.4418.1;gene_id | MSTRG.4418; |
| 1 StringTie exon       | 267733051 | 267733535 | . | - | . | transcript_MSTRG.4418.1;gene_id | MSTRG.4418; |
| 1 StringTie exon       | 267734864 | 267735085 | . | - | . | transcript_MSTRG.4418.1;gene_id | MSTRG.4418; |
| 1 StringTie transcript | 270038605 | 270048457 | . | - | . | transcript_MSTRG.4508.1;gene_id | MSTRG.4508; |
| 1 StringTie exon       | 270038605 | 270038723 | . | - | . | transcript_MSTRG.4508.1;gene_id | MSTRG.4508; |
| 1 StringTie exon       | 270047676 | 270048457 | . | - | . | transcript_MSTRG.4508.1;gene_id | MSTRG.4508; |
| 1 StringTie transcript | 270641281 | 270652483 | . | - | . | transcript_MSTRG.4520.1;gene_id | MSTRG.4520; |
| 1 StringTie exon       | 270641281 | 270641760 | . | - | . | transcript_MSTRG.4520.1;gene_id | MSTRG.4520; |
| 1 StringTie exon       | 270643484 | 270643594 | . | - | . | transcript_MSTRG.4520.1;gene_id | MSTRG.4520; |
| 1 StringTie exon       | 270652396 | 270652483 | . | - | . | transcript_MSTRG.4520.1;gene_id | MSTRG.4520; |
| 1 StringTie transcript | 271260011 | 271270483 | . | - | . | transcript_MSTRG.4533.3;gene_id | MSTRG.4533; |
| 1 StringTie exon       | 271260011 | 271261787 | . | - | . | transcript_MSTRG.4533.3;gene_id | MSTRG.4533; |
| 1 StringTie exon       | 271270408 | 271270483 | . | - | . | transcript_MSTRG.4533.3;gene_id | MSTRG.4533; |
| 1 StringTie transcript | 271260162 | 271270481 | . | - | . | transcript_MSTRG.4533.4;gene_id | MSTRG.4533; |
| 1 StringTie exon       | 271260162 | 271261787 | . | - | . | transcript_MSTRG.4533.4;gene_id | MSTRG.4533; |
| 1 StringTie exon       | 271261875 | 271262047 | . | - | . | transcript_MSTRG.4533.4;gene_id | MSTRG.4533; |
| 1 StringTie exon       | 271270408 | 271270481 | . | - | . | transcript_MSTRG.4533.4;gene_id | MSTRG.4533; |
| 1 StringTie transcript | 272078166 | 272080416 | . | - | . | transcript_MSTRG.4558.1;gene_id | MSTRG.4558; |
| 1 StringTie exon       | 272078166 | 272078605 | . | - | . | transcript_MSTRG.4558.1;gene_id | MSTRG.4558; |
| 1 StringTie exon       | 272078809 | 272078926 | . | - | . | transcript_MSTRG.4558.1;gene_id | MSTRG.4558; |
| 1 StringTie exon       | 272079703 | 272079843 | . | - | . | transcript_MSTRG.4558.1;gene_id | MSTRG.4558; |
| 1 StringTie exon       | 272080298 | 272080416 | . | - | . | transcript_MSTRG.4558.1;gene_id | MSTRG.4558; |
| 1 StringTie transcript | 273557907 | 273559878 | . | - | . | transcript_MSTRG.4604.2;gene_id | MSTRG.4604; |
| 1 StringTie exon       | 273557907 | 273557963 | . | - | . | transcript_MSTRG.4604.2;gene_id | MSTRG.4604; |
| 1 StringTie exon       | 273558614 | 273559118 | . | - | . | transcript_MSTRG.4604.2;gene_id | MSTRG.4604; |
| 1 StringTie exon       | 273559661 | 273559878 | . | - | . | transcript_MSTRG.4604.2;gene_id | MSTRG.4604; |
| 1 StringTie transcript | 273557907 | 273559895 | . | - | . | transcript_MSTRG.4604.1;gene_id | MSTRG.4604; |
| 1 StringTie exon       | 273557907 | 273557963 | . | - | . | transcript_MSTRG.4604.1;gene_id | MSTRG.4604; |
| 1 StringTie exon       | 273558614 | 273559118 | . | - | . | transcript_MSTRG.4604.1;gene_id | MSTRG.4604; |
| 1 StringTie exon       | 273559720 | 273559895 | . | - | . | transcript_MSTRG.4604.1;gene_id | MSTRG.4604; |
| 1 StringTie transcript | 273587934 | 273590538 | . | - | . | transcript_MSTRG.4607.1;gene_id | MSTRG.4607; |
| 1 StringTie exon       | 273587934 | 273589046 | . | - | . | transcript_MSTRG.4607.1;gene_id | MSTRG.4607; |
| 1 StringTie exon       | 273589863 | 273590273 | . | - | . | transcript_MSTRG.4607.1;gene_id | MSTRG.4607; |

|                         |           |             |     |                                 |             |
|-------------------------|-----------|-------------|-----|---------------------------------|-------------|
| 1 StringTie exon        | 273590456 | 273590538 . | - . | transcript_MSTRG.4607.1;gene_id | MSTRG.4607; |
| 10 StringTie transcript | 1675211   | 1681024 .   | + . | transcript_MSTRG.4635.2;gene_id | MSTRG.4635; |
| 10 StringTie exon       | 1675211   | 1675268 .   | + . | transcript_MSTRG.4635.2;gene_id | MSTRG.4635; |
| 10 StringTie exon       | 1679829   | 1679872 .   | + . | transcript_MSTRG.4635.2;gene_id | MSTRG.4635; |
| 10 StringTie exon       | 1680752   | 1681024 .   | + . | transcript_MSTRG.4635.2;gene_id | MSTRG.4635; |
| 10 StringTie transcript | 9219962   | 9221106 .   | + . | transcript_MSTRG.4678.1;gene_id | MSTRG.4678; |
| 10 StringTie exon       | 9219962   | 9220235 .   | + . | transcript_MSTRG.4678.1;gene_id | MSTRG.4678; |
| 10 StringTie exon       | 9220871   | 9221106 .   | + . | transcript_MSTRG.4678.1;gene_id | MSTRG.4678; |
| 10 StringTie transcript | 10775953  | 10799381 .  | + . | transcript_MSTRG.4727.1;gene_id | MSTRG.4727; |
| 10 StringTie exon       | 10775953  | 10776103 .  | + . | transcript_MSTRG.4727.1;gene_id | MSTRG.4727; |
| 10 StringTie exon       | 10799234  | 10799381 .  | + . | transcript_MSTRG.4727.1;gene_id | MSTRG.4727; |
| 10 StringTie transcript | 11301925  | 11302959 .  | + . | transcript_MSTRG.4785.1;gene_id | MSTRG.4785; |
| 10 StringTie exon       | 11301925  | 11302047 .  | + . | transcript_MSTRG.4785.1;gene_id | MSTRG.4785; |
| 10 StringTie exon       | 11302131  | 11302264 .  | + . | transcript_MSTRG.4785.1;gene_id | MSTRG.4785; |
| 10 StringTie exon       | 11302882  | 11302959 .  | + . | transcript_MSTRG.4785.1;gene_id | MSTRG.4785; |
| 10 StringTie transcript | 12432018  | 12435457 .  | + . | transcript_MSTRG.4832.1;gene_id | MSTRG.4832; |
| 10 StringTie exon       | 12432018  | 12432086 .  | + . | transcript_MSTRG.4832.1;gene_id | MSTRG.4832; |
| 10 StringTie exon       | 12433109  | 12433205 .  | + . | transcript_MSTRG.4832.1;gene_id | MSTRG.4832; |
| 10 StringTie exon       | 12434769  | 12435457 .  | + . | transcript_MSTRG.4832.1;gene_id | MSTRG.4832; |
| 10 StringTie transcript | 12537679  | 12538304 .  | + . | transcript_MSTRG.4843.1;gene_id | MSTRG.4843; |
| 10 StringTie exon       | 12537679  | 12538304 .  | + . | transcript_MSTRG.4843.1;gene_id | MSTRG.4843; |
| 10 StringTie transcript | 12537716  | 12538364 .  | + . | transcript_MSTRG.4843.2;gene_id | MSTRG.4843; |
| 10 StringTie exon       | 12537716  | 12537993 .  | + . | transcript_MSTRG.4843.2;gene_id | MSTRG.4843; |
| 10 StringTie exon       | 12538090  | 12538364 .  | + . | transcript_MSTRG.4843.2;gene_id | MSTRG.4843; |
| 10 StringTie transcript | 12774756  | 12790834 .  | + . | transcript_MSTRG.4858.1;gene_id | MSTRG.4858; |
| 10 StringTie exon       | 12774756  | 12774865 .  | + . | transcript_MSTRG.4858.1;gene_id | MSTRG.4858; |
| 10 StringTie exon       | 12790201  | 12790834 .  | + . | transcript_MSTRG.4858.1;gene_id | MSTRG.4858; |
| 10 StringTie transcript | 13965290  | 13970367 .  | + . | transcript_MSTRG.4895.1;gene_id | MSTRG.4895; |
| 10 StringTie exon       | 13965290  | 13965366 .  | + . | transcript_MSTRG.4895.1;gene_id | MSTRG.4895; |
| 10 StringTie exon       | 13968931  | 13969041 .  | + . | transcript_MSTRG.4895.1;gene_id | MSTRG.4895; |
| 10 StringTie exon       | 13970101  | 13970367 .  | + . | transcript_MSTRG.4895.1;gene_id | MSTRG.4895; |
| 10 StringTie transcript | 14654355  | 14656287 .  | + . | transcript_MSTRG.4919.1;gene_id | MSTRG.4919; |
| 10 StringTie exon       | 14654355  | 14654902 .  | + . | transcript_MSTRG.4919.1;gene_id | MSTRG.4919; |
| 10 StringTie exon       | 14655645  | 14656287 .  | + . | transcript_MSTRG.4919.1;gene_id | MSTRG.4919; |
| 10 StringTie transcript | 17392908  | 17393473 .  | + . | transcript_MSTRG.4952.1;gene_id | MSTRG.4952; |



|                        |          |            |   |   |                                 |             |
|------------------------|----------|------------|---|---|---------------------------------|-------------|
| 10 StringTie exon      | 17392908 | 17392948 . | + | . | transcript_MSTRG.4952.1;gene_id | MSTRG.4952; |
| 10 StringTie exon      | 17393062 | 17393473 . | + | . | transcript_MSTRG.4952.1;gene_id | MSTRG.4952; |
| 10 StringTie transcrip | 19657446 | 19692131 . | + | . | transcript_MSTRG.4981.1;gene_id | MSTRG.4981; |
| 10 StringTie exon      | 19657446 | 19657469 . | + | . | transcript_MSTRG.4981.1;gene_id | MSTRG.4981; |
| 10 StringTie exon      | 19691850 | 19692131 . | + | . | transcript_MSTRG.4981.1;gene_id | MSTRG.4981; |
| 10 StringTie transcrip | 24171972 | 24177201 . | + | . | transcript_MSTRG.5058.1;gene_id | MSTRG.5058; |
| 10 StringTie exon      | 24171972 | 24172031 . | + | . | transcript_MSTRG.5058.1;gene_id | MSTRG.5058; |
| 10 StringTie exon      | 24176995 | 24177201 . | + | . | transcript_MSTRG.5058.1;gene_id | MSTRG.5058; |
| 10 StringTie transcrip | 24962738 | 24969170 . | + | . | transcript_MSTRG.5076.1;gene_id | MSTRG.5076; |
| 10 StringTie exon      | 24962738 | 24962846 . | + | . | transcript_MSTRG.5076.1;gene_id | MSTRG.5076; |
| 10 StringTie exon      | 24968885 | 24969170 . | + | . | transcript_MSTRG.5076.1;gene_id | MSTRG.5076; |
| 10 StringTie transcrip | 24962740 | 24969170 . | + | . | transcript_MSTRG.5076.2;gene_id | MSTRG.5076; |
| 10 StringTie exon      | 24962740 | 24962887 . | + | . | transcript_MSTRG.5076.2;gene_id | MSTRG.5076; |
| 10 StringTie exon      | 24968926 | 24969170 . | + | . | transcript_MSTRG.5076.2;gene_id | MSTRG.5076; |
| 10 StringTie transcrip | 27078284 | 27078762 . | + | . | transcript_MSTRG.5131.3;gene_id | MSTRG.5131; |
| 10 StringTie exon      | 27078284 | 27078539 . | + | . | transcript_MSTRG.5131.3;gene_id | MSTRG.5131; |
| 10 StringTie exon      | 27078624 | 27078762 . | + | . | transcript_MSTRG.5131.3;gene_id | MSTRG.5131; |
| 10 StringTie transcrip | 27078284 | 27078762 . | + | . | transcript_MSTRG.5131.4;gene_id | MSTRG.5131; |
| 10 StringTie exon      | 27078284 | 27078567 . | + | . | transcript_MSTRG.5131.4;gene_id | MSTRG.5131; |
| 10 StringTie exon      | 27078624 | 27078762 . | + | . | transcript_MSTRG.5131.4;gene_id | MSTRG.5131; |
| 10 StringTie transcrip | 27078284 | 27078762 . | + | . | transcript_MSTRG.5131.2;gene_id | MSTRG.5131; |
| 10 StringTie exon      | 27078284 | 27078553 . | + | . | transcript_MSTRG.5131.2;gene_id | MSTRG.5131; |
| 10 StringTie exon      | 27078582 | 27078762 . | + | . | transcript_MSTRG.5131.2;gene_id | MSTRG.5131; |
| 10 StringTie transcrip | 27078284 | 27078762 . | + | . | transcript_MSTRG.5131.1;gene_id | MSTRG.5131; |
| 10 StringTie exon      | 27078284 | 27078525 . | + | . | transcript_MSTRG.5131.1;gene_id | MSTRG.5131; |
| 10 StringTie exon      | 27078582 | 27078762 . | + | . | transcript_MSTRG.5131.1;gene_id | MSTRG.5131; |
| 10 StringTie transcrip | 27078373 | 27078762 . | + | . | transcript_MSTRG.5131.5;gene_id | MSTRG.5131; |
| 10 StringTie exon      | 27078373 | 27078567 . | + | . | transcript_MSTRG.5131.5;gene_id | MSTRG.5131; |
| 10 StringTie exon      | 27078652 | 27078762 . | + | . | transcript_MSTRG.5131.5;gene_id | MSTRG.5131; |
| 10 StringTie transcrip | 27078387 | 27078734 . | + | . | transcript_MSTRG.5131.8;gene_id | MSTRG.5131; |
| 10 StringTie exon      | 27078387 | 27078595 . | + | . | transcript_MSTRG.5131.8;gene_id | MSTRG.5131; |
| 10 StringTie exon      | 27078624 | 27078734 . | + | . | transcript_MSTRG.5131.8;gene_id | MSTRG.5131; |
| 10 StringTie transcrip | 27078387 | 27078762 . | + | . | transcript_MSTRG.5131.7;gene_id | MSTRG.5131; |
| 10 StringTie exon      | 27078387 | 27078497 . | + | . | transcript_MSTRG.5131.7;gene_id | MSTRG.5131; |
| 10 StringTie exon      | 27078582 | 27078762 . | + | . | transcript_MSTRG.5131.7;gene_id | MSTRG.5131; |

|                         |          |          |   |   |   |                                 |             |
|-------------------------|----------|----------|---|---|---|---------------------------------|-------------|
| 10 StringTie transcript | 27078387 | 27078762 | . | + | . | transcript_MSTRG.5131.6;gene_id | MSTRG.5131; |
| 10 StringTie exon       | 27078387 | 27078511 | . | + | . | transcript_MSTRG.5131.6;gene_id | MSTRG.5131; |
| 10 StringTie exon       | 27078596 | 27078762 | . | + | . | transcript_MSTRG.5131.6;gene_id | MSTRG.5131; |
| 10 StringTie transcript | 27078405 | 27078762 | . | + | . | transcript_MSTRG.5131.9;gene_id | MSTRG.5131; |
| 10 StringTie exon       | 27078405 | 27078539 | . | + | . | transcript_MSTRG.5131.9;gene_id | MSTRG.5131; |
| 10 StringTie exon       | 27078596 | 27078762 | . | + | . | transcript_MSTRG.5131.9;gene_id | MSTRG.5131; |
| 10 StringTie transcript | 27078405 | 27078762 | . | + | . | transcript_MSTRG.5131.1(gene_id | MSTRG.5131; |
| 10 StringTie exon       | 27078405 | 27078511 | . | + | . | transcript_MSTRG.5131.1(gene_id | MSTRG.5131; |
| 10 StringTie exon       | 27078596 | 27078623 | . | + | . | transcript_MSTRG.5131.1(gene_id | MSTRG.5131; |
| 10 StringTie exon       | 27078652 | 27078762 | . | + | . | transcript_MSTRG.5131.1(gene_id | MSTRG.5131; |
| 10 StringTie transcript | 28700862 | 28770674 | . | + | . | transcript_MSTRG.5157.1;gene_id | MSTRG.5157; |
| 10 StringTie exon       | 28700862 | 28700882 | . | + | . | transcript_MSTRG.5157.1;gene_id | MSTRG.5157; |
| 10 StringTie exon       | 28770493 | 28770674 | . | + | . | transcript_MSTRG.5157.1;gene_id | MSTRG.5157; |
| 10 StringTie transcript | 28730942 | 28770679 | . | + | . | transcript_MSTRG.5157.2;gene_id | MSTRG.5157; |
| 10 StringTie exon       | 28730942 | 28730966 | . | + | . | transcript_MSTRG.5157.2;gene_id | MSTRG.5157; |
| 10 StringTie exon       | 28770497 | 28770679 | . | + | . | transcript_MSTRG.5157.2;gene_id | MSTRG.5157; |
| 10 StringTie transcript | 32457168 | 32460186 | . | + | . | transcript_MSTRG.5264.1;gene_id | MSTRG.5264; |
| 10 StringTie exon       | 32457168 | 32457219 | . | + | . | transcript_MSTRG.5264.1;gene_id | MSTRG.5264; |
| 10 StringTie exon       | 32460015 | 32460186 | . | + | . | transcript_MSTRG.5264.1;gene_id | MSTRG.5264; |
| 10 StringTie transcript | 39050169 | 39051043 | . | + | . | transcript_MSTRG.5344.1;gene_id | MSTRG.5344; |
| 10 StringTie exon       | 39050169 | 39050207 | . | + | . | transcript_MSTRG.5344.1;gene_id | MSTRG.5344; |
| 10 StringTie exon       | 39050743 | 39051043 | . | + | . | transcript_MSTRG.5344.1;gene_id | MSTRG.5344; |
| 10 StringTie transcript | 43072537 | 43073070 | . | + | . | transcript_MSTRG.5457.1;gene_id | MSTRG.5457; |
| 10 StringTie exon       | 43072537 | 43072876 | . | + | . | transcript_MSTRG.5457.1;gene_id | MSTRG.5457; |
| 10 StringTie exon       | 43073037 | 43073070 | . | + | . | transcript_MSTRG.5457.1;gene_id | MSTRG.5457; |
| 10 StringTie transcript | 51611422 | 51615888 | . | + | . | transcript_MSTRG.5657.1;gene_id | MSTRG.5657; |
| 10 StringTie exon       | 51611422 | 51611582 | . | + | . | transcript_MSTRG.5657.1;gene_id | MSTRG.5657; |
| 10 StringTie exon       | 51612685 | 51615888 | . | + | . | transcript_MSTRG.5657.1;gene_id | MSTRG.5657; |
| 10 StringTie transcript | 56430856 | 56566648 | . | + | . | transcript_MSTRG.5730.1;gene_id | MSTRG.5730; |
| 10 StringTie exon       | 56430856 | 56430896 | . | + | . | transcript_MSTRG.5730.1;gene_id | MSTRG.5730; |
| 10 StringTie exon       | 56437592 | 56437672 | . | + | . | transcript_MSTRG.5730.1;gene_id | MSTRG.5730; |
| 10 StringTie exon       | 56440798 | 56440959 | . | + | . | transcript_MSTRG.5730.1;gene_id | MSTRG.5730; |
| 10 StringTie exon       | 56466524 | 56466633 | . | + | . | transcript_MSTRG.5730.1;gene_id | MSTRG.5730; |
| 10 StringTie exon       | 56467008 | 56467139 | . | + | . | transcript_MSTRG.5730.1;gene_id | MSTRG.5730; |
| 10 StringTie exon       | 56475584 | 56475673 | . | + | . | transcript_MSTRG.5730.1;gene_id | MSTRG.5730; |

|                         |          |          |   |   |   |                                 |             |
|-------------------------|----------|----------|---|---|---|---------------------------------|-------------|
| 10 StringTie exon       | 56477531 | 56477609 | . | + | . | transcript_MSTRG.5730.1;gene_id | MSTRG.5730; |
| 10 StringTie exon       | 56478528 | 56478719 | . | + | . | transcript_MSTRG.5730.1;gene_id | MSTRG.5730; |
| 10 StringTie exon       | 56561004 | 56566648 | . | + | . | transcript_MSTRG.5730.1;gene_id | MSTRG.5730; |
| 10 StringTie transcript | 56459935 | 56566648 | . | + | . | transcript_MSTRG.5730.2;gene_id | MSTRG.5730; |
| 10 StringTie exon       | 56459935 | 56460675 | . | + | . | transcript_MSTRG.5730.2;gene_id | MSTRG.5730; |
| 10 StringTie exon       | 56466524 | 56466633 | . | + | . | transcript_MSTRG.5730.2;gene_id | MSTRG.5730; |
| 10 StringTie exon       | 56467008 | 56467139 | . | + | . | transcript_MSTRG.5730.2;gene_id | MSTRG.5730; |
| 10 StringTie exon       | 56475584 | 56475673 | . | + | . | transcript_MSTRG.5730.2;gene_id | MSTRG.5730; |
| 10 StringTie exon       | 56477531 | 56477609 | . | + | . | transcript_MSTRG.5730.2;gene_id | MSTRG.5730; |
| 10 StringTie exon       | 56478528 | 56478719 | . | + | . | transcript_MSTRG.5730.2;gene_id | MSTRG.5730; |
| 10 StringTie exon       | 56547773 | 56547924 | . | + | . | transcript_MSTRG.5730.2;gene_id | MSTRG.5730; |
| 10 StringTie exon       | 56561004 | 56566648 | . | + | . | transcript_MSTRG.5730.2;gene_id | MSTRG.5730; |
| 10 StringTie transcript | 56476510 | 56567237 | . | + | . | transcript_MSTRG.5730.3;gene_id | MSTRG.5730; |
| 10 StringTie exon       | 56476510 | 56476618 | . | + | . | transcript_MSTRG.5730.3;gene_id | MSTRG.5730; |
| 10 StringTie exon       | 56477531 | 56477609 | . | + | . | transcript_MSTRG.5730.3;gene_id | MSTRG.5730; |
| 10 StringTie exon       | 56478528 | 56478719 | . | + | . | transcript_MSTRG.5730.3;gene_id | MSTRG.5730; |
| 10 StringTie exon       | 56561004 | 56567237 | . | + | . | transcript_MSTRG.5730.3;gene_id | MSTRG.5730; |
| 10 StringTie transcript | 56766168 | 56771875 | . | + | . | transcript_MSTRG.5724.1;gene_id | MSTRG.5724; |
| 10 StringTie exon       | 56766168 | 56771875 | . | + | . | transcript_MSTRG.5724.1;gene_id | MSTRG.5724; |
| 10 StringTie transcript | 56766306 | 56769889 | . | + | . | transcript_MSTRG.5724.2;gene_id | MSTRG.5724; |
| 10 StringTie exon       | 56766306 | 56766438 | . | + | . | transcript_MSTRG.5724.2;gene_id | MSTRG.5724; |
| 10 StringTie exon       | 56768750 | 56769889 | . | + | . | transcript_MSTRG.5724.2;gene_id | MSTRG.5724; |
| 10 StringTie transcript | 57601382 | 57635626 | . | + | . | transcript_MSTRG.5732.1;gene_id | MSTRG.5732; |
| 10 StringTie exon       | 57601382 | 57601804 | . | + | . | transcript_MSTRG.5732.1;gene_id | MSTRG.5732; |
| 10 StringTie exon       | 57608052 | 57608165 | . | + | . | transcript_MSTRG.5732.1;gene_id | MSTRG.5732; |
| 10 StringTie exon       | 57635558 | 57635626 | . | + | . | transcript_MSTRG.5732.1;gene_id | MSTRG.5732; |
| 10 StringTie transcript | 58078675 | 58080842 | . | + | . | transcript_MSTRG.5758.1;gene_id | MSTRG.5758; |
| 10 StringTie exon       | 58078675 | 58078709 | . | + | . | transcript_MSTRG.5758.1;gene_id | MSTRG.5758; |
| 10 StringTie exon       | 58080542 | 58080842 | . | + | . | transcript_MSTRG.5758.1;gene_id | MSTRG.5758; |
| 10 StringTie transcript | 60121314 | 60129122 | . | + | . | transcript_MSTRG.5774.1;gene_id | MSTRG.5774; |
| 10 StringTie exon       | 60121314 | 60121382 | . | + | . | transcript_MSTRG.5774.1;gene_id | MSTRG.5774; |
| 10 StringTie exon       | 60128795 | 60129122 | . | + | . | transcript_MSTRG.5774.1;gene_id | MSTRG.5774; |
| 10 StringTie transcript | 69305031 | 69316011 | . | + | . | transcript_MSTRG.5883.1;gene_id | MSTRG.5883; |
| 10 StringTie exon       | 69305031 | 69305146 | . | + | . | transcript_MSTRG.5883.1;gene_id | MSTRG.5883; |
| 10 StringTie exon       | 69315900 | 69316011 | . | + | . | transcript_MSTRG.5883.1;gene_id | MSTRG.5883; |

|                        |          |            |   |   |                                 |             |
|------------------------|----------|------------|---|---|---------------------------------|-------------|
| 10 StringTie transcrip | 69316705 | 69318977 . | + | . | transcript_MSTRG.5884.1;gene_id | MSTRG.5884; |
| 10 StringTie exon      | 69316705 | 69316821 . | + | . | transcript_MSTRG.5884.1;gene_id | MSTRG.5884; |
| 10 StringTie exon      | 69318511 | 69318977 . | + | . | transcript_MSTRG.5884.1;gene_id | MSTRG.5884; |
| 10 StringTie transcrip | 995954   | 1017525 .  | - | . | transcript_MSTRG.4626.1;gene_id | MSTRG.4626; |
| 10 StringTie exon      | 995954   | 996200 .   | - | . | transcript_MSTRG.4626.1;gene_id | MSTRG.4626; |
| 10 StringTie exon      | 1017504  | 1017525 .  | - | . | transcript_MSTRG.4626.1;gene_id | MSTRG.4626; |
| 10 StringTie transcrip | 8538164  | 8542956 .  | - | . | transcript_MSTRG.4682.1;gene_id | MSTRG.4682; |
| 10 StringTie exon      | 8538164  | 8538182 .  | - | . | transcript_MSTRG.4682.1;gene_id | MSTRG.4682; |
| 10 StringTie exon      | 8542751  | 8542956 .  | - | . | transcript_MSTRG.4682.1;gene_id | MSTRG.4682; |
| 10 StringTie transcrip | 9243085  | 9253037 .  | - | . | transcript_MSTRG.4679.1;gene_id | MSTRG.4679; |
| 10 StringTie exon      | 9243085  | 9243117 .  | - | . | transcript_MSTRG.4679.1;gene_id | MSTRG.4679; |
| 10 StringTie exon      | 9252789  | 9253037 .  | - | . | transcript_MSTRG.4679.1;gene_id | MSTRG.4679; |
| 10 StringTie transcrip | 10599145 | 10609927 . | - | . | transcript_MSTRG.4726.1;gene_id | MSTRG.4726; |
| 10 StringTie exon      | 10599145 | 10599907 . | - | . | transcript_MSTRG.4726.1;gene_id | MSTRG.4726; |
| 10 StringTie exon      | 10609892 | 10609927 . | - | . | transcript_MSTRG.4726.1;gene_id | MSTRG.4726; |
| 10 StringTie transcrip | 10962729 | 10965688 . | - | . | transcript_MSTRG.4731.1;gene_id | MSTRG.4731; |
| 10 StringTie exon      | 10962729 | 10962860 . | - | . | transcript_MSTRG.4731.1;gene_id | MSTRG.4731; |
| 10 StringTie exon      | 10965492 | 10965688 . | - | . | transcript_MSTRG.4731.1;gene_id | MSTRG.4731; |
| 10 StringTie transcrip | 11390949 | 11391302 . | - | . | transcript_MSTRG.4814.1;gene_id | MSTRG.4814; |
| 10 StringTie exon      | 11390949 | 11391053 . | - | . | transcript_MSTRG.4814.1;gene_id | MSTRG.4814; |
| 10 StringTie exon      | 11391102 | 11391197 . | - | . | transcript_MSTRG.4814.1;gene_id | MSTRG.4814; |
| 10 StringTie exon      | 11391222 | 11391302 . | - | . | transcript_MSTRG.4814.1;gene_id | MSTRG.4814; |
| 10 StringTie transcrip | 11391016 | 11391258 . | - | . | transcript_MSTRG.4814.2;gene_id | MSTRG.4814; |
| 10 StringTie exon      | 11391016 | 11391125 . | - | . | transcript_MSTRG.4814.2;gene_id | MSTRG.4814; |
| 10 StringTie exon      | 11391150 | 11391258 . | - | . | transcript_MSTRG.4814.2;gene_id | MSTRG.4814; |
| 10 StringTie transcrip | 12459445 | 12471960 . | - | . | transcript_MSTRG.4837.1;gene_id | MSTRG.4837; |
| 10 StringTie exon      | 12459445 | 12460080 . | - | . | transcript_MSTRG.4837.1;gene_id | MSTRG.4837; |
| 10 StringTie exon      | 12471898 | 12471960 . | - | . | transcript_MSTRG.4837.1;gene_id | MSTRG.4837; |
| 10 StringTie transcrip | 12544285 | 12547432 . | - | . | transcript_MSTRG.4845.1;gene_id | MSTRG.4845; |
| 10 StringTie exon      | 12544285 | 12544378 . | - | . | transcript_MSTRG.4845.1;gene_id | MSTRG.4845; |
| 10 StringTie exon      | 12547118 | 12547432 . | - | . | transcript_MSTRG.4845.1;gene_id | MSTRG.4845; |
| 10 StringTie transcrip | 23601660 | 23607226 . | - | . | transcript_MSTRG.5031.5;gene_id | MSTRG.5031; |
| 10 StringTie exon      | 23601660 | 23602492 . | - | . | transcript_MSTRG.5031.5;gene_id | MSTRG.5031; |
| 10 StringTie exon      | 23605068 | 23605228 . | - | . | transcript_MSTRG.5031.5;gene_id | MSTRG.5031; |
| 10 StringTie exon      | 23606946 | 23607226 . | - | . | transcript_MSTRG.5031.5;gene_id | MSTRG.5031; |

|                        |          |            |     |                                 |             |
|------------------------|----------|------------|-----|---------------------------------|-------------|
| 10 StringTie transcrip | 26230010 | 26230457 . | - . | transcript_MSTRG.5113.1;gene_id | MSTRG.5113; |
| 10 StringTie exon      | 26230010 | 26230303 . | - . | transcript_MSTRG.5113.1;gene_id | MSTRG.5113; |
| 10 StringTie exon      | 26230436 | 26230457 . | - . | transcript_MSTRG.5113.1;gene_id | MSTRG.5113; |
| 10 StringTie transcrip | 26485606 | 26500606 . | - . | transcript_MSTRG.5105.1;gene_id | MSTRG.5105; |
| 10 StringTie exon      | 26485606 | 26485796 . | - . | transcript_MSTRG.5105.1;gene_id | MSTRG.5105; |
| 10 StringTie exon      | 26486715 | 26486828 . | - . | transcript_MSTRG.5105.1;gene_id | MSTRG.5105; |
| 10 StringTie exon      | 26494397 | 26494511 . | - . | transcript_MSTRG.5105.1;gene_id | MSTRG.5105; |
| 10 StringTie exon      | 26500544 | 26500606 . | - . | transcript_MSTRG.5105.1;gene_id | MSTRG.5105; |
| 10 StringTie transcrip | 26629637 | 26633311 . | - . | transcript_MSTRG.5120.1;gene_id | MSTRG.5120; |
| 10 StringTie exon      | 26629637 | 26629916 . | - . | transcript_MSTRG.5120.1;gene_id | MSTRG.5120; |
| 10 StringTie exon      | 26630820 | 26631032 . | - . | transcript_MSTRG.5120.1;gene_id | MSTRG.5120; |
| 10 StringTie exon      | 26631917 | 26631970 . | - . | transcript_MSTRG.5120.1;gene_id | MSTRG.5120; |
| 10 StringTie exon      | 26633171 | 26633311 . | - . | transcript_MSTRG.5120.1;gene_id | MSTRG.5120; |
| 10 StringTie transcrip | 27862058 | 27862352 . | - . | transcript_MSTRG.5161.1;gene_id | MSTRG.5161; |
| 10 StringTie exon      | 27862058 | 27862238 . | - . | transcript_MSTRG.5161.1;gene_id | MSTRG.5161; |
| 10 StringTie exon      | 27862287 | 27862352 . | - . | transcript_MSTRG.5161.1;gene_id | MSTRG.5161; |
| 10 StringTie transcrip | 30584323 | 30632503 . | - . | transcript_MSTRG.5187.1;gene_id | MSTRG.5187; |
| 10 StringTie exon      | 30584323 | 30584436 . | - . | transcript_MSTRG.5187.1;gene_id | MSTRG.5187; |
| 10 StringTie exon      | 30588839 | 30588963 . | - . | transcript_MSTRG.5187.1;gene_id | MSTRG.5187; |
| 10 StringTie exon      | 30632462 | 30632503 . | - . | transcript_MSTRG.5187.1;gene_id | MSTRG.5187; |
| 10 StringTie transcrip | 31740071 | 31742773 . | - . | transcript_MSTRG.5227.1;gene_id | MSTRG.5227; |
| 10 StringTie exon      | 31740071 | 31740209 . | - . | transcript_MSTRG.5227.1;gene_id | MSTRG.5227; |
| 10 StringTie exon      | 31741522 | 31741632 . | - . | transcript_MSTRG.5227.1;gene_id | MSTRG.5227; |
| 10 StringTie exon      | 31742742 | 31742773 . | - . | transcript_MSTRG.5227.1;gene_id | MSTRG.5227; |
| 10 StringTie transcrip | 31742832 | 31747821 . | - . | transcript_MSTRG.5228.1;gene_id | MSTRG.5228; |
| 10 StringTie exon      | 31742832 | 31742914 . | - . | transcript_MSTRG.5228.1;gene_id | MSTRG.5228; |
| 10 StringTie exon      | 31744965 | 31745101 . | - . | transcript_MSTRG.5228.1;gene_id | MSTRG.5228; |
| 10 StringTie exon      | 31747626 | 31747821 . | - . | transcript_MSTRG.5228.1;gene_id | MSTRG.5228; |
| 10 StringTie transcrip | 33865644 | 33866336 . | - . | transcript_MSTRG.5317.1;gene_id | MSTRG.5317; |
| 10 StringTie exon      | 33865644 | 33865867 . | - . | transcript_MSTRG.5317.1;gene_id | MSTRG.5317; |
| 10 StringTie exon      | 33866194 | 33866336 . | - . | transcript_MSTRG.5317.1;gene_id | MSTRG.5317; |
| 10 StringTie transcrip | 39845691 | 39895175 . | - . | transcript_MSTRG.5355.1;gene_id | MSTRG.5355; |
| 10 StringTie exon      | 39845691 | 39845724 . | - . | transcript_MSTRG.5355.1;gene_id | MSTRG.5355; |
| 10 StringTie exon      | 39894748 | 39895175 . | - . | transcript_MSTRG.5355.1;gene_id | MSTRG.5355; |
| 10 StringTie transcrip | 39893438 | 39895175 . | - . | transcript_MSTRG.5355.2;gene_id | MSTRG.5355; |

|                         |          |          |   |   |   |                                 |             |
|-------------------------|----------|----------|---|---|---|---------------------------------|-------------|
| 10 StringTie exon       | 39893438 | 39893837 | . | - | . | transcript_MSTRG.5355.2;gene_id | MSTRG.5355; |
| 10 StringTie exon       | 39893917 | 39895175 | . | - | . | transcript_MSTRG.5355.2;gene_id | MSTRG.5355; |
| 10 StringTie transcript | 40881038 | 40888265 | . | - | . | transcript_MSTRG.5376.1;gene_id | MSTRG.5376; |
| 10 StringTie exon       | 40881038 | 40882087 | . | - | . | transcript_MSTRG.5376.1;gene_id | MSTRG.5376; |
| 10 StringTie exon       | 40884706 | 40888265 | . | - | . | transcript_MSTRG.5376.1;gene_id | MSTRG.5376; |
| 10 StringTie transcript | 41784429 | 41787530 | . | - | . | transcript_MSTRG.5391.1;gene_id | MSTRG.5391; |
| 10 StringTie exon       | 41784429 | 41784999 | . | - | . | transcript_MSTRG.5391.1;gene_id | MSTRG.5391; |
| 10 StringTie exon       | 41787418 | 41787530 | . | - | . | transcript_MSTRG.5391.1;gene_id | MSTRG.5391; |
| 10 StringTie transcript | 41893847 | 42014204 | . | - | . | transcript_MSTRG.5446.1;gene_id | MSTRG.5446; |
| 10 StringTie exon       | 41893847 | 41897590 | . | - | . | transcript_MSTRG.5446.1;gene_id | MSTRG.5446; |
| 10 StringTie exon       | 41943202 | 41943309 | . | - | . | transcript_MSTRG.5446.1;gene_id | MSTRG.5446; |
| 10 StringTie exon       | 42014162 | 42014204 | . | - | . | transcript_MSTRG.5446.1;gene_id | MSTRG.5446; |
| 10 StringTie transcript | 41895201 | 42013483 | . | - | . | transcript_MSTRG.5446.2;gene_id | MSTRG.5446; |
| 10 StringTie exon       | 41895201 | 41897590 | . | - | . | transcript_MSTRG.5446.2;gene_id | MSTRG.5446; |
| 10 StringTie exon       | 41943202 | 41943309 | . | - | . | transcript_MSTRG.5446.2;gene_id | MSTRG.5446; |
| 10 StringTie exon       | 42013394 | 42013483 | . | - | . | transcript_MSTRG.5446.2;gene_id | MSTRG.5446; |
| 10 StringTie transcript | 42256119 | 42261528 | . | - | . | transcript_MSTRG.5437.1;gene_id | MSTRG.5437; |
| 10 StringTie exon       | 42256119 | 42256324 | . | - | . | transcript_MSTRG.5437.1;gene_id | MSTRG.5437; |
| 10 StringTie exon       | 42261218 | 42261528 | . | - | . | transcript_MSTRG.5437.1;gene_id | MSTRG.5437; |
| 10 StringTie transcript | 43517519 | 43517809 | . | - | . | transcript_MSTRG.5473.1;gene_id | MSTRG.5473; |
| 10 StringTie exon       | 43517519 | 43517629 | . | - | . | transcript_MSTRG.5473.1;gene_id | MSTRG.5473; |
| 10 StringTie exon       | 43517699 | 43517809 | . | - | . | transcript_MSTRG.5473.1;gene_id | MSTRG.5473; |
| 10 StringTie transcript | 44025919 | 44026316 | . | - | . | transcript_MSTRG.5476.1;gene_id | MSTRG.5476; |
| 10 StringTie exon       | 44025919 | 44026190 | . | - | . | transcript_MSTRG.5476.1;gene_id | MSTRG.5476; |
| 10 StringTie exon       | 44026230 | 44026316 | . | - | . | transcript_MSTRG.5476.1;gene_id | MSTRG.5476; |
| 10 StringTie transcript | 44886440 | 44888591 | . | - | . | transcript_MSTRG.5518.1;gene_id | MSTRG.5518; |
| 10 StringTie exon       | 44886440 | 44886642 | . | - | . | transcript_MSTRG.5518.1;gene_id | MSTRG.5518; |
| 10 StringTie exon       | 44888385 | 44888591 | . | - | . | transcript_MSTRG.5518.1;gene_id | MSTRG.5518; |
| 10 StringTie transcript | 48035808 | 48043352 | . | - | . | transcript_MSTRG.5593.1;gene_id | MSTRG.5593; |
| 10 StringTie exon       | 48035808 | 48036960 | . | - | . | transcript_MSTRG.5593.1;gene_id | MSTRG.5593; |
| 10 StringTie exon       | 48038503 | 48038612 | . | - | . | transcript_MSTRG.5593.1;gene_id | MSTRG.5593; |
| 10 StringTie exon       | 48039236 | 48039597 | . | - | . | transcript_MSTRG.5593.1;gene_id | MSTRG.5593; |
| 10 StringTie exon       | 48043188 | 48043352 | . | - | . | transcript_MSTRG.5593.1;gene_id | MSTRG.5593; |
| 10 StringTie transcript | 48335134 | 48413588 | . | - | . | transcript_MSTRG.5599.1;gene_id | MSTRG.5599; |
| 10 StringTie exon       | 48335134 | 48335149 | . | - | . | transcript_MSTRG.5599.1;gene_id | MSTRG.5599; |

|                        |          |          |   |   |   |                                 |             |
|------------------------|----------|----------|---|---|---|---------------------------------|-------------|
| 10 StringTie exon      | 48412624 | 48413588 | . | - | . | transcript_MSTRG.5599.1;gene_id | MSTRG.5599; |
| 10 StringTie transcrip | 50361299 | 50363725 | . | - | . | transcript_MSTRG.5638.1;gene_id | MSTRG.5638; |
| 10 StringTie exon      | 50361299 | 50362390 | . | - | . | transcript_MSTRG.5638.1;gene_id | MSTRG.5638; |
| 10 StringTie exon      | 50362740 | 50363725 | . | - | . | transcript_MSTRG.5638.1;gene_id | MSTRG.5638; |
| 10 StringTie transcrip | 50361614 | 50362993 | . | - | . | transcript_MSTRG.5638.2;gene_id | MSTRG.5638; |
| 10 StringTie exon      | 50361614 | 50362259 | . | - | . | transcript_MSTRG.5638.2;gene_id | MSTRG.5638; |
| 10 StringTie exon      | 50362740 | 50362993 | . | - | . | transcript_MSTRG.5638.2;gene_id | MSTRG.5638; |
| 10 StringTie transcrip | 50531892 | 50539833 | . | - | . | transcript_MSTRG.5647.1;gene_id | MSTRG.5647; |
| 10 StringTie exon      | 50531892 | 50532412 | . | - | . | transcript_MSTRG.5647.1;gene_id | MSTRG.5647; |
| 10 StringTie exon      | 50537258 | 50537337 | . | - | . | transcript_MSTRG.5647.1;gene_id | MSTRG.5647; |
| 10 StringTie exon      | 50539548 | 50539833 | . | - | . | transcript_MSTRG.5647.1;gene_id | MSTRG.5647; |
| 10 StringTie transcrip | 50776803 | 50777902 | . | - | . | transcript_MSTRG.5660.1;gene_id | MSTRG.5660; |
| 10 StringTie exon      | 50776803 | 50777133 | . | - | . | transcript_MSTRG.5660.1;gene_id | MSTRG.5660; |
| 10 StringTie exon      | 50777434 | 50777902 | . | - | . | transcript_MSTRG.5660.1;gene_id | MSTRG.5660; |
| 10 StringTie transcrip | 57091461 | 57114882 | . | - | . | transcript_MSTRG.5737.1;gene_id | MSTRG.5737; |
| 10 StringTie exon      | 57091461 | 57092095 | . | - | . | transcript_MSTRG.5737.1;gene_id | MSTRG.5737; |
| 10 StringTie exon      | 57114798 | 57114882 | . | - | . | transcript_MSTRG.5737.1;gene_id | MSTRG.5737; |
| 10 StringTie transcrip | 64949390 | 64952879 | . | - | . | transcript_MSTRG.5819.1;gene_id | MSTRG.5819; |
| 10 StringTie exon      | 64949390 | 64951204 | . | - | . | transcript_MSTRG.5819.1;gene_id | MSTRG.5819; |
| 10 StringTie exon      | 64952234 | 64952879 | . | - | . | transcript_MSTRG.5819.1;gene_id | MSTRG.5819; |
| 10 StringTie transcrip | 64974754 | 64989112 | . | - | . | transcript_MSTRG.5820.1;gene_id | MSTRG.5820; |
| 10 StringTie exon      | 64974754 | 64975239 | . | - | . | transcript_MSTRG.5820.1;gene_id | MSTRG.5820; |
| 10 StringTie exon      | 64989053 | 64989112 | . | - | . | transcript_MSTRG.5820.1;gene_id | MSTRG.5820; |
| 10 StringTie transcrip | 65408718 | 65411094 | . | - | . | transcript_MSTRG.5836.1;gene_id | MSTRG.5836; |
| 10 StringTie exon      | 65408718 | 65409290 | . | - | . | transcript_MSTRG.5836.1;gene_id | MSTRG.5836; |
| 10 StringTie exon      | 65410650 | 65411094 | . | - | . | transcript_MSTRG.5836.1;gene_id | MSTRG.5836; |
| 10 StringTie transcrip | 68531078 | 68538916 | . | - | . | transcript_MSTRG.5875.1;gene_id | MSTRG.5875; |
| 10 StringTie exon      | 68531078 | 68531397 | . | - | . | transcript_MSTRG.5875.1;gene_id | MSTRG.5875; |
| 10 StringTie exon      | 68538758 | 68538916 | . | - | . | transcript_MSTRG.5875.1;gene_id | MSTRG.5875; |
| 11 StringTie transcrip | 2212356  | 2214590  | . | + | . | transcript_MSTRG.5930.1;gene_id | MSTRG.5930; |
| 11 StringTie exon      | 2212356  | 2212831  | . | + | . | transcript_MSTRG.5930.1;gene_id | MSTRG.5930; |
| 11 StringTie exon      | 2213008  | 2214590  | . | + | . | transcript_MSTRG.5930.1;gene_id | MSTRG.5930; |
| 11 StringTie transcrip | 7142547  | 7144813  | . | + | . | transcript_MSTRG.6025.1;gene_id | MSTRG.6025; |
| 11 StringTie exon      | 7142547  | 7142897  | . | + | . | transcript_MSTRG.6025.1;gene_id | MSTRG.6025; |
| 11 StringTie exon      | 7144334  | 7144813  | . | + | . | transcript_MSTRG.6025.1;gene_id | MSTRG.6025; |

|                        |          |            |   |   |                                 |             |
|------------------------|----------|------------|---|---|---------------------------------|-------------|
| 11 StringTie transcrip | 8352956  | 8358076 .  | + | . | transcript_MSTRG.6088.1;gene_id | MSTRG.6088; |
| 11 StringTie exon      | 8352956  | 8354750 .  | + | . | transcript_MSTRG.6088.1;gene_id | MSTRG.6088; |
| 11 StringTie exon      | 8355045  | 8358076 .  | + | . | transcript_MSTRG.6088.1;gene_id | MSTRG.6088; |
| 11 StringTie transcrip | 9623528  | 9624428 .  | + | . | transcript_MSTRG.6126.1;gene_id | MSTRG.6126; |
| 11 StringTie exon      | 9623528  | 9624053 .  | + | . | transcript_MSTRG.6126.1;gene_id | MSTRG.6126; |
| 11 StringTie exon      | 9624128  | 9624428 .  | + | . | transcript_MSTRG.6126.1;gene_id | MSTRG.6126; |
| 11 StringTie transcrip | 9837756  | 9838771 .  | + | . | transcript_MSTRG.6127.1;gene_id | MSTRG.6127; |
| 11 StringTie exon      | 9837756  | 9838207 .  | + | . | transcript_MSTRG.6127.1;gene_id | MSTRG.6127; |
| 11 StringTie exon      | 9838534  | 9838771 .  | + | . | transcript_MSTRG.6127.1;gene_id | MSTRG.6127; |
| 11 StringTie transcrip | 10578304 | 10580178 . | + | . | transcript_MSTRG.6107.1;gene_id | MSTRG.6107; |
| 11 StringTie exon      | 10578304 | 10578584 . | + | . | transcript_MSTRG.6107.1;gene_id | MSTRG.6107; |
| 11 StringTie exon      | 10579292 | 10580178 . | + | . | transcript_MSTRG.6107.1;gene_id | MSTRG.6107; |
| 11 StringTie transcrip | 12345104 | 12356633 . | + | . | transcript_MSTRG.6161.1;gene_id | MSTRG.6161; |
| 11 StringTie exon      | 12345104 | 12345315 . | + | . | transcript_MSTRG.6161.1;gene_id | MSTRG.6161; |
| 11 StringTie exon      | 12347101 | 12347171 . | + | . | transcript_MSTRG.6161.1;gene_id | MSTRG.6161; |
| 11 StringTie exon      | 12350616 | 12350675 . | + | . | transcript_MSTRG.6161.1;gene_id | MSTRG.6161; |
| 11 StringTie exon      | 12355879 | 12356027 . | + | . | transcript_MSTRG.6161.1;gene_id | MSTRG.6161; |
| 11 StringTie exon      | 12356426 | 12356633 . | + | . | transcript_MSTRG.6161.1;gene_id | MSTRG.6161; |
| 11 StringTie transcrip | 12345139 | 12357531 . | + | . | transcript_MSTRG.6161.2;gene_id | MSTRG.6161; |
| 11 StringTie exon      | 12345139 | 12345315 . | + | . | transcript_MSTRG.6161.2;gene_id | MSTRG.6161; |
| 11 StringTie exon      | 12347101 | 12347171 . | + | . | transcript_MSTRG.6161.2;gene_id | MSTRG.6161; |
| 11 StringTie exon      | 12350616 | 12350675 . | + | . | transcript_MSTRG.6161.2;gene_id | MSTRG.6161; |
| 11 StringTie exon      | 12350852 | 12350916 . | + | . | transcript_MSTRG.6161.2;gene_id | MSTRG.6161; |
| 11 StringTie exon      | 12352041 | 12352169 . | + | . | transcript_MSTRG.6161.2;gene_id | MSTRG.6161; |
| 11 StringTie exon      | 12353152 | 12353270 . | + | . | transcript_MSTRG.6161.2;gene_id | MSTRG.6161; |
| 11 StringTie exon      | 12355879 | 12356027 . | + | . | transcript_MSTRG.6161.2;gene_id | MSTRG.6161; |
| 11 StringTie exon      | 12356426 | 12357531 . | + | . | transcript_MSTRG.6161.2;gene_id | MSTRG.6161; |
| 11 StringTie transcrip | 15410728 | 15411879 . | + | . | transcript_MSTRG.6231.1;gene_id | MSTRG.6231; |
| 11 StringTie exon      | 15410728 | 15411044 . | + | . | transcript_MSTRG.6231.1;gene_id | MSTRG.6231; |
| 11 StringTie exon      | 15411824 | 15411879 . | + | . | transcript_MSTRG.6231.1;gene_id | MSTRG.6231; |
| 11 StringTie transcrip | 16086880 | 16101400 . | + | . | transcript_MSTRG.6289.3;gene_id | MSTRG.6289; |
| 11 StringTie exon      | 16086880 | 16087791 . | + | . | transcript_MSTRG.6289.3;gene_id | MSTRG.6289; |
| 11 StringTie exon      | 16099036 | 16101400 . | + | . | transcript_MSTRG.6289.3;gene_id | MSTRG.6289; |
| 11 StringTie transcrip | 17683032 | 17684702 . | + | . | transcript_MSTRG.6303.1;gene_id | MSTRG.6303; |
| 11 StringTie exon      | 17683032 | 17683282 . | + | . | transcript_MSTRG.6303.1;gene_id | MSTRG.6303; |



|                        |          |            |   |   |                                 |             |
|------------------------|----------|------------|---|---|---------------------------------|-------------|
| 11 StringTie exon      | 17684669 | 17684702 . | + | . | transcript_MSTRG.6303.1;gene_id | MSTRG.6303; |
| 11 StringTie transcrip | 17690399 | 17833389 . | + | . | transcript_MSTRG.6323.1;gene_id | MSTRG.6323; |
| 11 StringTie exon      | 17690399 | 17690489 . | + | . | transcript_MSTRG.6323.1;gene_id | MSTRG.6323; |
| 11 StringTie exon      | 17737683 | 17737777 . | + | . | transcript_MSTRG.6323.1;gene_id | MSTRG.6323; |
| 11 StringTie exon      | 17745806 | 17745872 . | + | . | transcript_MSTRG.6323.1;gene_id | MSTRG.6323; |
| 11 StringTie exon      | 17756989 | 17757085 . | + | . | transcript_MSTRG.6323.1;gene_id | MSTRG.6323; |
| 11 StringTie exon      | 17760988 | 17761081 . | + | . | transcript_MSTRG.6323.1;gene_id | MSTRG.6323; |
| 11 StringTie exon      | 17761434 | 17761545 . | + | . | transcript_MSTRG.6323.1;gene_id | MSTRG.6323; |
| 11 StringTie exon      | 17778900 | 17779114 . | + | . | transcript_MSTRG.6323.1;gene_id | MSTRG.6323; |
| 11 StringTie exon      | 17781637 | 17781703 . | + | . | transcript_MSTRG.6323.1;gene_id | MSTRG.6323; |
| 11 StringTie exon      | 17833023 | 17833389 . | + | . | transcript_MSTRG.6323.1;gene_id | MSTRG.6323; |
| 11 StringTie transcrip | 17737682 | 17760936 . | + | . | transcript_MSTRG.6323.2;gene_id | MSTRG.6323; |
| 11 StringTie exon      | 17737682 | 17737777 . | + | . | transcript_MSTRG.6323.2;gene_id | MSTRG.6323; |
| 11 StringTie exon      | 17745806 | 17745872 . | + | . | transcript_MSTRG.6323.2;gene_id | MSTRG.6323; |
| 11 StringTie exon      | 17756989 | 17757085 . | + | . | transcript_MSTRG.6323.2;gene_id | MSTRG.6323; |
| 11 StringTie exon      | 17760786 | 17760936 . | + | . | transcript_MSTRG.6323.2;gene_id | MSTRG.6323; |
| 11 StringTie transcrip | 17757764 | 17772559 . | + | . | transcript_MSTRG.6323.4;gene_id | MSTRG.6323; |
| 11 StringTie exon      | 17757764 | 17758790 . | + | . | transcript_MSTRG.6323.4;gene_id | MSTRG.6323; |
| 11 StringTie exon      | 17760988 | 17761081 . | + | . | transcript_MSTRG.6323.4;gene_id | MSTRG.6323; |
| 11 StringTie exon      | 17761434 | 17761545 . | + | . | transcript_MSTRG.6323.4;gene_id | MSTRG.6323; |
| 11 StringTie exon      | 17771089 | 17772559 . | + | . | transcript_MSTRG.6323.4;gene_id | MSTRG.6323; |
| 11 StringTie transcrip | 17758675 | 17807754 . | + | . | transcript_MSTRG.6323.5;gene_id | MSTRG.6323; |
| 11 StringTie exon      | 17758675 | 17758790 . | + | . | transcript_MSTRG.6323.5;gene_id | MSTRG.6323; |
| 11 StringTie exon      | 17760988 | 17761081 . | + | . | transcript_MSTRG.6323.5;gene_id | MSTRG.6323; |
| 11 StringTie exon      | 17761434 | 17761545 . | + | . | transcript_MSTRG.6323.5;gene_id | MSTRG.6323; |
| 11 StringTie exon      | 17778900 | 17779114 . | + | . | transcript_MSTRG.6323.5;gene_id | MSTRG.6323; |
| 11 StringTie exon      | 17781637 | 17781703 . | + | . | transcript_MSTRG.6323.5;gene_id | MSTRG.6323; |
| 11 StringTie exon      | 17807495 | 17807754 . | + | . | transcript_MSTRG.6323.5;gene_id | MSTRG.6323; |
| 11 StringTie transcrip | 17760974 | 17766133 . | + | . | transcript_MSTRG.6323.6;gene_id | MSTRG.6323; |
| 11 StringTie exon      | 17760974 | 17761081 . | + | . | transcript_MSTRG.6323.6;gene_id | MSTRG.6323; |
| 11 StringTie exon      | 17761434 | 17761545 . | + | . | transcript_MSTRG.6323.6;gene_id | MSTRG.6323; |
| 11 StringTie exon      | 17765228 | 17766133 . | + | . | transcript_MSTRG.6323.6;gene_id | MSTRG.6323; |
| 11 StringTie transcrip | 17878829 | 17924326 . | + | . | transcript_MSTRG.6312.1;gene_id | MSTRG.6312; |
| 11 StringTie exon      | 17878829 | 17878988 . | + | . | transcript_MSTRG.6312.1;gene_id | MSTRG.6312; |
| 11 StringTie exon      | 17919518 | 17919590 . | + | . | transcript_MSTRG.6312.1;gene_id | MSTRG.6312; |

|                        |          |          |   |   |   |                                 |             |
|------------------------|----------|----------|---|---|---|---------------------------------|-------------|
| 11 StringTie exon      | 17924001 | 17924326 | . | + | . | transcript_MSTRG.6312.1;gene_id | MSTRG.6312; |
| 11 StringTie transcrip | 22185751 | 22200938 | . | + | . | transcript_MSTRG.6429.1;gene_id | MSTRG.6429; |
| 11 StringTie exon      | 22185751 | 22185839 | . | + | . | transcript_MSTRG.6429.1;gene_id | MSTRG.6429; |
| 11 StringTie exon      | 22186573 | 22186660 | . | + | . | transcript_MSTRG.6429.1;gene_id | MSTRG.6429; |
| 11 StringTie exon      | 22200715 | 22200938 | . | + | . | transcript_MSTRG.6429.1;gene_id | MSTRG.6429; |
| 11 StringTie transcrip | 23914858 | 23927125 | . | + | . | transcript_MSTRG.6486.1;gene_id | MSTRG.6486; |
| 11 StringTie exon      | 23914858 | 23915212 | . | + | . | transcript_MSTRG.6486.1;gene_id | MSTRG.6486; |
| 11 StringTie exon      | 23925949 | 23927125 | . | + | . | transcript_MSTRG.6486.1;gene_id | MSTRG.6486; |
| 11 StringTie transcrip | 23923994 | 23927125 | . | + | . | transcript_MSTRG.6486.2;gene_id | MSTRG.6486; |
| 11 StringTie exon      | 23923994 | 23924134 | . | + | . | transcript_MSTRG.6486.2;gene_id | MSTRG.6486; |
| 11 StringTie exon      | 23925949 | 23927125 | . | + | . | transcript_MSTRG.6486.2;gene_id | MSTRG.6486; |
| 11 StringTie transcrip | 52242370 | 52433668 | . | + | . | transcript_MSTRG.6692.1;gene_id | MSTRG.6692; |
| 11 StringTie exon      | 52242370 | 52242458 | . | + | . | transcript_MSTRG.6692.1;gene_id | MSTRG.6692; |
| 11 StringTie exon      | 52310948 | 52311047 | . | + | . | transcript_MSTRG.6692.1;gene_id | MSTRG.6692; |
| 11 StringTie exon      | 52424360 | 52424502 | . | + | . | transcript_MSTRG.6692.1;gene_id | MSTRG.6692; |
| 11 StringTie exon      | 52427159 | 52427222 | . | + | . | transcript_MSTRG.6692.1;gene_id | MSTRG.6692; |
| 11 StringTie exon      | 52433639 | 52433668 | . | + | . | transcript_MSTRG.6692.1;gene_id | MSTRG.6692; |
| 11 StringTie transcrip | 62142573 | 62149831 | . | + | . | transcript_MSTRG.6812.1;gene_id | MSTRG.6812; |
| 11 StringTie exon      | 62142573 | 62142626 | . | + | . | transcript_MSTRG.6812.1;gene_id | MSTRG.6812; |
| 11 StringTie exon      | 62146081 | 62149831 | . | + | . | transcript_MSTRG.6812.1;gene_id | MSTRG.6812; |
| 11 StringTie transcrip | 73878334 | 73884346 | . | + | . | transcript_MSTRG.6920.1;gene_id | MSTRG.6920; |
| 11 StringTie exon      | 73878334 | 73878784 | . | + | . | transcript_MSTRG.6920.1;gene_id | MSTRG.6920; |
| 11 StringTie exon      | 73883760 | 73884346 | . | + | . | transcript_MSTRG.6920.1;gene_id | MSTRG.6920; |
| 11 StringTie transcrip | 76716846 | 76724724 | . | + | . | transcript_MSTRG.6956.1;gene_id | MSTRG.6956; |
| 11 StringTie exon      | 76716846 | 76717230 | . | + | . | transcript_MSTRG.6956.1;gene_id | MSTRG.6956; |
| 11 StringTie exon      | 76724563 | 76724724 | . | + | . | transcript_MSTRG.6956.1;gene_id | MSTRG.6956; |
| 11 StringTie transcrip | 77355702 | 77358520 | . | + | . | transcript_MSTRG.6970.1;gene_id | MSTRG.6970; |
| 11 StringTie exon      | 77355702 | 77355812 | . | + | . | transcript_MSTRG.6970.1;gene_id | MSTRG.6970; |
| 11 StringTie exon      | 77357876 | 77357990 | . | + | . | transcript_MSTRG.6970.1;gene_id | MSTRG.6970; |
| 11 StringTie exon      | 77358163 | 77358520 | . | + | . | transcript_MSTRG.6970.1;gene_id | MSTRG.6970; |
| 11 StringTie transcrip | 500080   | 503336   | . | - | . | transcript_MSTRG.5898.1;gene_id | MSTRG.5898; |
| 11 StringTie exon      | 500080   | 500736   | . | - | . | transcript_MSTRG.5898.1;gene_id | MSTRG.5898; |
| 11 StringTie exon      | 501139   | 503336   | . | - | . | transcript_MSTRG.5898.1;gene_id | MSTRG.5898; |
| 11 StringTie transcrip | 5477911  | 5486807  | . | - | . | transcript_MSTRG.6000.1;gene_id | MSTRG.6000; |
| 11 StringTie exon      | 5477911  | 5480439  | . | - | . | transcript_MSTRG.6000.1;gene_id | MSTRG.6000; |

|                         |          |            |     |                                 |             |
|-------------------------|----------|------------|-----|---------------------------------|-------------|
| 11 StringTie exon       | 5485954  | 5486096 .  | - . | transcript_MSTRG.6000.1;gene_id | MSTRG.6000; |
| 11 StringTie exon       | 5486426  | 5486807 .  | - . | transcript_MSTRG.6000.1;gene_id | MSTRG.6000; |
| 11 StringTie transcript | 5477952  | 5486807 .  | - . | transcript_MSTRG.6000.2;gene_id | MSTRG.6000; |
| 11 StringTie exon       | 5477952  | 5482603 .  | - . | transcript_MSTRG.6000.2;gene_id | MSTRG.6000; |
| 11 StringTie exon       | 5485954  | 5486096 .  | - . | transcript_MSTRG.6000.2;gene_id | MSTRG.6000; |
| 11 StringTie exon       | 5486426  | 5486807 .  | - . | transcript_MSTRG.6000.2;gene_id | MSTRG.6000; |
| 11 StringTie transcript | 7071362  | 7085888 .  | - . | transcript_MSTRG.6020.1;gene_id | MSTRG.6020; |
| 11 StringTie exon       | 7071362  | 7071544 .  | - . | transcript_MSTRG.6020.1;gene_id | MSTRG.6020; |
| 11 StringTie exon       | 7085655  | 7085888 .  | - . | transcript_MSTRG.6020.1;gene_id | MSTRG.6020; |
| 11 StringTie transcript | 8407079  | 8496369 .  | - . | transcript_MSTRG.6089.1;gene_id | MSTRG.6089; |
| 11 StringTie exon       | 8407079  | 8407103 .  | - . | transcript_MSTRG.6089.1;gene_id | MSTRG.6089; |
| 11 StringTie exon       | 8493614  | 8496369 .  | - . | transcript_MSTRG.6089.1;gene_id | MSTRG.6089; |
| 11 StringTie transcript | 8425852  | 8487729 .  | - . | transcript_MSTRG.6090.1;gene_id | MSTRG.6090; |
| 11 StringTie exon       | 8425852  | 8425869 .  | - . | transcript_MSTRG.6090.1;gene_id | MSTRG.6090; |
| 11 StringTie exon       | 8486536  | 8487729 .  | - . | transcript_MSTRG.6090.1;gene_id | MSTRG.6090; |
| 11 StringTie transcript | 8638052  | 8638759 .  | - . | transcript_MSTRG.6091.1;gene_id | MSTRG.6091; |
| 11 StringTie exon       | 8638052  | 8638087 .  | - . | transcript_MSTRG.6091.1;gene_id | MSTRG.6091; |
| 11 StringTie exon       | 8638363  | 8638759 .  | - . | transcript_MSTRG.6091.1;gene_id | MSTRG.6091; |
| 11 StringTie transcript | 14944853 | 15271537 . | - . | transcript_MSTRG.6211.1;gene_id | MSTRG.6211; |
| 11 StringTie exon       | 14944853 | 14944889 . | - . | transcript_MSTRG.6211.1;gene_id | MSTRG.6211; |
| 11 StringTie exon       | 15198209 | 15198284 . | - . | transcript_MSTRG.6211.1;gene_id | MSTRG.6211; |
| 11 StringTie exon       | 15271403 | 15271537 . | - . | transcript_MSTRG.6211.1;gene_id | MSTRG.6211; |
| 11 StringTie transcript | 17711787 | 17714725 . | - . | transcript_MSTRG.6326.1;gene_id | MSTRG.6326; |
| 11 StringTie exon       | 17711787 | 17711851 . | - . | transcript_MSTRG.6326.1;gene_id | MSTRG.6326; |
| 11 StringTie exon       | 17712847 | 17714725 . | - . | transcript_MSTRG.6326.1;gene_id | MSTRG.6326; |
| 11 StringTie transcript | 18412516 | 18419074 . | - . | transcript_MSTRG.6359.1;gene_id | MSTRG.6359; |
| 11 StringTie exon       | 18412516 | 18412794 . | - . | transcript_MSTRG.6359.1;gene_id | MSTRG.6359; |
| 11 StringTie exon       | 18418085 | 18419074 . | - . | transcript_MSTRG.6359.1;gene_id | MSTRG.6359; |
| 11 StringTie transcript | 18424266 | 18461647 . | - . | transcript_MSTRG.6360.1;gene_id | MSTRG.6360; |
| 11 StringTie exon       | 18424266 | 18426102 . | - . | transcript_MSTRG.6360.1;gene_id | MSTRG.6360; |
| 11 StringTie exon       | 18459324 | 18459444 . | - . | transcript_MSTRG.6360.1;gene_id | MSTRG.6360; |
| 11 StringTie exon       | 18461318 | 18461647 . | - . | transcript_MSTRG.6360.1;gene_id | MSTRG.6360; |
| 11 StringTie transcript | 19621240 | 19629345 . | - . | transcript_MSTRG.6404.1;gene_id | MSTRG.6404; |
| 11 StringTie exon       | 19621240 | 19621313 . | - . | transcript_MSTRG.6404.1;gene_id | MSTRG.6404; |
| 11 StringTie exon       | 19628947 | 19629345 . | - . | transcript_MSTRG.6404.1;gene_id | MSTRG.6404; |

|                        |          |            |     |                                 |             |
|------------------------|----------|------------|-----|---------------------------------|-------------|
| 11 StringTie transcrip | 22283324 | 22284418 . | - . | transcript_MSTRG.6450.1;gene_id | MSTRG.6450; |
| 11 StringTie exon      | 22283324 | 22283655 . | - . | transcript_MSTRG.6450.1;gene_id | MSTRG.6450; |
| 11 StringTie exon      | 22284352 | 22284418 . | - . | transcript_MSTRG.6450.1;gene_id | MSTRG.6450; |
| 11 StringTie transcrip | 22435954 | 22449656 . | - . | transcript_MSTRG.6434.1;gene_id | MSTRG.6434; |
| 11 StringTie exon      | 22435954 | 22436161 . | - . | transcript_MSTRG.6434.1;gene_id | MSTRG.6434; |
| 11 StringTie exon      | 22449504 | 22449656 . | - . | transcript_MSTRG.6434.1;gene_id | MSTRG.6434; |
| 11 StringTie transcrip | 22477099 | 22489942 . | - . | transcript_MSTRG.6444.1;gene_id | MSTRG.6444; |
| 11 StringTie exon      | 22477099 | 22478223 . | - . | transcript_MSTRG.6444.1;gene_id | MSTRG.6444; |
| 11 StringTie exon      | 22489857 | 22489942 . | - . | transcript_MSTRG.6444.1;gene_id | MSTRG.6444; |
| 11 StringTie transcrip | 23627015 | 23629086 . | - . | transcript_MSTRG.6491.1;gene_id | MSTRG.6491; |
| 11 StringTie exon      | 23627015 | 23627585 . | - . | transcript_MSTRG.6491.1;gene_id | MSTRG.6491; |
| 11 StringTie exon      | 23628270 | 23629086 . | - . | transcript_MSTRG.6491.1;gene_id | MSTRG.6491; |
| 11 StringTie transcrip | 23879790 | 23913154 . | - . | transcript_MSTRG.6492.1;gene_id | MSTRG.6492; |
| 11 StringTie exon      | 23879790 | 23880101 . | - . | transcript_MSTRG.6492.1;gene_id | MSTRG.6492; |
| 11 StringTie exon      | 23912820 | 23913154 . | - . | transcript_MSTRG.6492.1;gene_id | MSTRG.6492; |
| 11 StringTie transcrip | 23892071 | 23913096 . | - . | transcript_MSTRG.6492.2;gene_id | MSTRG.6492; |
| 11 StringTie exon      | 23892071 | 23893142 . | - . | transcript_MSTRG.6492.2;gene_id | MSTRG.6492; |
| 11 StringTie exon      | 23893586 | 23893673 . | - . | transcript_MSTRG.6492.2;gene_id | MSTRG.6492; |
| 11 StringTie exon      | 23912820 | 23913096 . | - . | transcript_MSTRG.6492.2;gene_id | MSTRG.6492; |
| 11 StringTie transcrip | 23893496 | 23913141 . | - . | transcript_MSTRG.6492.3;gene_id | MSTRG.6492; |
| 11 StringTie exon      | 23893496 | 23893673 . | - . | transcript_MSTRG.6492.3;gene_id | MSTRG.6492; |
| 11 StringTie exon      | 23896369 | 23896405 . | - . | transcript_MSTRG.6492.3;gene_id | MSTRG.6492; |
| 11 StringTie exon      | 23912820 | 23913141 . | - . | transcript_MSTRG.6492.3;gene_id | MSTRG.6492; |
| 11 StringTie transcrip | 29089010 | 29089861 . | - . | transcript_MSTRG.6531.1;gene_id | MSTRG.6531; |
| 11 StringTie exon      | 29089010 | 29089069 . | - . | transcript_MSTRG.6531.1;gene_id | MSTRG.6531; |
| 11 StringTie exon      | 29089669 | 29089861 . | - . | transcript_MSTRG.6531.1;gene_id | MSTRG.6531; |
| 11 StringTie transcrip | 33256322 | 33258536 . | - . | transcript_MSTRG.6544.1;gene_id | MSTRG.6544; |
| 11 StringTie exon      | 33256322 | 33257768 . | - . | transcript_MSTRG.6544.1;gene_id | MSTRG.6544; |
| 11 StringTie exon      | 33258448 | 33258536 . | - . | transcript_MSTRG.6544.1;gene_id | MSTRG.6544; |
| 11 StringTie transcrip | 49523776 | 49536106 . | - . | transcript_MSTRG.6726.1;gene_id | MSTRG.6726; |
| 11 StringTie exon      | 49523776 | 49523802 . | - . | transcript_MSTRG.6726.1;gene_id | MSTRG.6726; |
| 11 StringTie exon      | 49535820 | 49536106 . | - . | transcript_MSTRG.6726.1;gene_id | MSTRG.6726; |
| 11 StringTie transcrip | 52159783 | 52160553 . | - . | transcript_MSTRG.6684.2;gene_id | MSTRG.6684; |
| 11 StringTie exon      | 52159783 | 52159999 . | - . | transcript_MSTRG.6684.2;gene_id | MSTRG.6684; |
| 11 StringTie exon      | 52160246 | 52160553 . | - . | transcript_MSTRG.6684.2;gene_id | MSTRG.6684; |

|                        |          |            |     |                                 |             |
|------------------------|----------|------------|-----|---------------------------------|-------------|
| 11 StringTie transcrip | 52159783 | 52160680 . | - . | transcript_MSTRG.6684.1;gene_id | MSTRG.6684; |
| 11 StringTie exon      | 52159783 | 52159999 . | - . | transcript_MSTRG.6684.1;gene_id | MSTRG.6684; |
| 11 StringTie exon      | 52160296 | 52160680 . | - . | transcript_MSTRG.6684.1;gene_id | MSTRG.6684; |
| 11 StringTie transcrip | 76285253 | 76290498 . | - . | transcript_MSTRG.6940.1;gene_id | MSTRG.6940; |
| 11 StringTie exon      | 76285253 | 76285579 . | - . | transcript_MSTRG.6940.1;gene_id | MSTRG.6940; |
| 11 StringTie exon      | 76290141 | 76290498 . | - . | transcript_MSTRG.6940.1;gene_id | MSTRG.6940; |
| 11 StringTie transcrip | 76626163 | 76649334 . | - . | transcript_MSTRG.6954.2;gene_id | MSTRG.6954; |
| 11 StringTie exon      | 76626163 | 76628599 . | - . | transcript_MSTRG.6954.2;gene_id | MSTRG.6954; |
| 11 StringTie exon      | 76648920 | 76649334 . | - . | transcript_MSTRG.6954.2;gene_id | MSTRG.6954; |
| 11 StringTie transcrip | 76626178 | 76647456 . | - . | transcript_MSTRG.6954.3;gene_id | MSTRG.6954; |
| 11 StringTie exon      | 76626178 | 76628599 . | - . | transcript_MSTRG.6954.3;gene_id | MSTRG.6954; |
| 11 StringTie exon      | 76647178 | 76647456 . | - . | transcript_MSTRG.6954.3;gene_id | MSTRG.6954; |
| 12 StringTie transcrip | 205476   | 207729 .   | + . | transcript_MSTRG.7015.1;gene_id | MSTRG.7015; |
| 12 StringTie exon      | 205476   | 205596 .   | + . | transcript_MSTRG.7015.1;gene_id | MSTRG.7015; |
| 12 StringTie exon      | 206535   | 207729 .   | + . | transcript_MSTRG.7015.1;gene_id | MSTRG.7015; |
| 12 StringTie transcrip | 559440   | 560316 .   | + . | transcript_MSTRG.7028.1;gene_id | MSTRG.7028; |
| 12 StringTie exon      | 559440   | 559461 .   | + . | transcript_MSTRG.7028.1;gene_id | MSTRG.7028; |
| 12 StringTie exon      | 559923   | 560316 .   | + . | transcript_MSTRG.7028.1;gene_id | MSTRG.7028; |
| 12 StringTie transcrip | 1190077  | 1192134 .  | + . | transcript_MSTRG.7074.1;gene_id | MSTRG.7074; |
| 12 StringTie exon      | 1190077  | 1190524 .  | + . | transcript_MSTRG.7074.1;gene_id | MSTRG.7074; |
| 12 StringTie exon      | 1191413  | 1192134 .  | + . | transcript_MSTRG.7074.1;gene_id | MSTRG.7074; |
| 12 StringTie transcrip | 1562157  | 1567167 .  | + . | transcript_MSTRG.7083.1;gene_id | MSTRG.7083; |
| 12 StringTie exon      | 1562157  | 1562237 .  | + . | transcript_MSTRG.7083.1;gene_id | MSTRG.7083; |
| 12 StringTie exon      | 1566195  | 1566313 .  | + . | transcript_MSTRG.7083.1;gene_id | MSTRG.7083; |
| 12 StringTie exon      | 1566965  | 1567167 .  | + . | transcript_MSTRG.7083.1;gene_id | MSTRG.7083; |
| 12 StringTie transcrip | 1562157  | 1567527 .  | + . | transcript_MSTRG.7083.2;gene_id | MSTRG.7083; |
| 12 StringTie exon      | 1562157  | 1562237 .  | + . | transcript_MSTRG.7083.2;gene_id | MSTRG.7083; |
| 12 StringTie exon      | 1563644  | 1563703 .  | + . | transcript_MSTRG.7083.2;gene_id | MSTRG.7083; |
| 12 StringTie exon      | 1566195  | 1566313 .  | + . | transcript_MSTRG.7083.2;gene_id | MSTRG.7083; |
| 12 StringTie exon      | 1566965  | 1567527 .  | + . | transcript_MSTRG.7083.2;gene_id | MSTRG.7083; |
| 12 StringTie transcrip | 1563643  | 1567149 .  | + . | transcript_MSTRG.7083.3;gene_id | MSTRG.7083; |
| 12 StringTie exon      | 1563643  | 1563703 .  | + . | transcript_MSTRG.7083.3;gene_id | MSTRG.7083; |
| 12 StringTie exon      | 1563966  | 1564209 .  | + . | transcript_MSTRG.7083.3;gene_id | MSTRG.7083; |
| 12 StringTie exon      | 1564378  | 1564517 .  | + . | transcript_MSTRG.7083.3;gene_id | MSTRG.7083; |
| 12 StringTie exon      | 1566195  | 1566313 .  | + . | transcript_MSTRG.7083.3;gene_id | MSTRG.7083; |

|                        |          |            |   |   |                                 |             |
|------------------------|----------|------------|---|---|---------------------------------|-------------|
| 12 StringTie exon      | 1566965  | 1567149 .  | + | . | transcript_MSTRG.7083.3;gene_id | MSTRG.7083; |
| 12 StringTie transcrip | 1563960  | 1567527 .  | + | . | transcript_MSTRG.7083.4;gene_id | MSTRG.7083; |
| 12 StringTie exon      | 1563960  | 1564517 .  | + | . | transcript_MSTRG.7083.4;gene_id | MSTRG.7083; |
| 12 StringTie exon      | 1566195  | 1566313 .  | + | . | transcript_MSTRG.7083.4;gene_id | MSTRG.7083; |
| 12 StringTie exon      | 1566965  | 1567527 .  | + | . | transcript_MSTRG.7083.4;gene_id | MSTRG.7083; |
| 12 StringTie transcrip | 1564021  | 1567527 .  | + | . | transcript_MSTRG.7083.5;gene_id | MSTRG.7083; |
| 12 StringTie exon      | 1564021  | 1564209 .  | + | . | transcript_MSTRG.7083.5;gene_id | MSTRG.7083; |
| 12 StringTie exon      | 1566195  | 1566313 .  | + | . | transcript_MSTRG.7083.5;gene_id | MSTRG.7083; |
| 12 StringTie exon      | 1566965  | 1567527 .  | + | . | transcript_MSTRG.7083.5;gene_id | MSTRG.7083; |
| 12 StringTie transcrip | 3228696  | 3233784 .  | + | . | transcript_MSTRG.7135.1;gene_id | MSTRG.7135; |
| 12 StringTie exon      | 3228696  | 3229167 .  | + | . | transcript_MSTRG.7135.1;gene_id | MSTRG.7135; |
| 12 StringTie exon      | 3229435  | 3230295 .  | + | . | transcript_MSTRG.7135.1;gene_id | MSTRG.7135; |
| 12 StringTie exon      | 3230954  | 3233784 .  | + | . | transcript_MSTRG.7135.1;gene_id | MSTRG.7135; |
| 12 StringTie transcrip | 3800153  | 3803313 .  | + | . | transcript_MSTRG.7158.1;gene_id | MSTRG.7158; |
| 12 StringTie exon      | 3800153  | 3800441 .  | + | . | transcript_MSTRG.7158.1;gene_id | MSTRG.7158; |
| 12 StringTie exon      | 3802794  | 3802891 .  | + | . | transcript_MSTRG.7158.1;gene_id | MSTRG.7158; |
| 12 StringTie exon      | 3803205  | 3803313 .  | + | . | transcript_MSTRG.7158.1;gene_id | MSTRG.7158; |
| 12 StringTie transcrip | 4904642  | 4968310 .  | + | . | transcript_MSTRG.7174.1;gene_id | MSTRG.7174; |
| 12 StringTie exon      | 4904642  | 4904664 .  | + | . | transcript_MSTRG.7174.1;gene_id | MSTRG.7174; |
| 12 StringTie exon      | 4966705  | 4968310 .  | + | . | transcript_MSTRG.7174.1;gene_id | MSTRG.7174; |
| 12 StringTie transcrip | 6714810  | 6715812 .  | + | . | transcript_MSTRG.7263.1;gene_id | MSTRG.7263; |
| 12 StringTie exon      | 6714810  | 6714909 .  | + | . | transcript_MSTRG.7263.1;gene_id | MSTRG.7263; |
| 12 StringTie exon      | 6715707  | 6715812 .  | + | . | transcript_MSTRG.7263.1;gene_id | MSTRG.7263; |
| 12 StringTie transcrip | 8378751  | 8401632 .  | + | . | transcript_MSTRG.7274.1;gene_id | MSTRG.7274; |
| 12 StringTie exon      | 8378751  | 8378789 .  | + | . | transcript_MSTRG.7274.1;gene_id | MSTRG.7274; |
| 12 StringTie exon      | 8401071  | 8401632 .  | + | . | transcript_MSTRG.7274.1;gene_id | MSTRG.7274; |
| 12 StringTie transcrip | 11163074 | 11163870 . | + | . | transcript_MSTRG.7330.1;gene_id | MSTRG.7330; |
| 12 StringTie exon      | 11163074 | 11163258 . | + | . | transcript_MSTRG.7330.1;gene_id | MSTRG.7330; |
| 12 StringTie exon      | 11163787 | 11163870 . | + | . | transcript_MSTRG.7330.1;gene_id | MSTRG.7330; |
| 12 StringTie transcrip | 12009144 | 12010756 . | + | . | transcript_MSTRG.7354.1;gene_id | MSTRG.7354; |
| 12 StringTie exon      | 12009144 | 12009220 . | + | . | transcript_MSTRG.7354.1;gene_id | MSTRG.7354; |
| 12 StringTie exon      | 12010405 | 12010756 . | + | . | transcript_MSTRG.7354.1;gene_id | MSTRG.7354; |
| 12 StringTie transcrip | 14089784 | 14091173 . | + | . | transcript_MSTRG.7381.1;gene_id | MSTRG.7381; |
| 12 StringTie exon      | 14089784 | 14090224 . | + | . | transcript_MSTRG.7381.1;gene_id | MSTRG.7381; |
| 12 StringTie exon      | 14090399 | 14090581 . | + | . | transcript_MSTRG.7381.1;gene_id | MSTRG.7381; |

|                        |          |            |   |   |                                 |             |
|------------------------|----------|------------|---|---|---------------------------------|-------------|
| 12 StringTie exon      | 14090983 | 14091173 . | + | . | transcript_MSTRG.7381.1;gene_id | MSTRG.7381; |
| 12 StringTie transcrip | 15447583 | 15454117 . | + | . | transcript_MSTRG.7442.1;gene_id | MSTRG.7442; |
| 12 StringTie exon      | 15447583 | 15447645 . | + | . | transcript_MSTRG.7442.1;gene_id | MSTRG.7442; |
| 12 StringTie exon      | 15449086 | 15454117 . | + | . | transcript_MSTRG.7442.1;gene_id | MSTRG.7442; |
| 12 StringTie transcrip | 15448598 | 15451921 . | + | . | transcript_MSTRG.7442.2;gene_id | MSTRG.7442; |
| 12 StringTie exon      | 15448598 | 15449353 . | + | . | transcript_MSTRG.7442.2;gene_id | MSTRG.7442; |
| 12 StringTie exon      | 15449498 | 15451921 . | + | . | transcript_MSTRG.7442.2;gene_id | MSTRG.7442; |
| 12 StringTie transcrip | 18254959 | 18265712 . | + | . | transcript_MSTRG.7490.1;gene_id | MSTRG.7490; |
| 12 StringTie exon      | 18254959 | 18254984 . | + | . | transcript_MSTRG.7490.1;gene_id | MSTRG.7490; |
| 12 StringTie exon      | 18262475 | 18265712 . | + | . | transcript_MSTRG.7490.1;gene_id | MSTRG.7490; |
| 12 StringTie transcrip | 19040404 | 19046983 . | + | . | transcript_MSTRG.7531.1;gene_id | MSTRG.7531; |
| 12 StringTie exon      | 19040404 | 19040485 . | + | . | transcript_MSTRG.7531.1;gene_id | MSTRG.7531; |
| 12 StringTie exon      | 19043629 | 19043971 . | + | . | transcript_MSTRG.7531.1;gene_id | MSTRG.7531; |
| 12 StringTie exon      | 19044720 | 19044829 . | + | . | transcript_MSTRG.7531.1;gene_id | MSTRG.7531; |
| 12 StringTie exon      | 19046739 | 19046983 . | + | . | transcript_MSTRG.7531.1;gene_id | MSTRG.7531; |
| 12 StringTie transcrip | 19281434 | 19281808 . | + | . | transcript_MSTRG.7545.4;gene_id | MSTRG.7545; |
| 12 StringTie exon      | 19281434 | 19281543 . | + | . | transcript_MSTRG.7545.4;gene_id | MSTRG.7545; |
| 12 StringTie exon      | 19281598 | 19281651 . | + | . | transcript_MSTRG.7545.4;gene_id | MSTRG.7545; |
| 12 StringTie exon      | 19281706 | 19281808 . | + | . | transcript_MSTRG.7545.4;gene_id | MSTRG.7545; |
| 12 StringTie transcrip | 19281434 | 19281808 . | + | . | transcript_MSTRG.7545.3;gene_id | MSTRG.7545; |
| 12 StringTie exon      | 19281434 | 19281579 . | + | . | transcript_MSTRG.7545.3;gene_id | MSTRG.7545; |
| 12 StringTie exon      | 19281706 | 19281808 . | + | . | transcript_MSTRG.7545.3;gene_id | MSTRG.7545; |
| 12 StringTie transcrip | 19281434 | 19281808 . | + | . | transcript_MSTRG.7545.2;gene_id | MSTRG.7545; |
| 12 StringTie exon      | 19281434 | 19281651 . | + | . | transcript_MSTRG.7545.2;gene_id | MSTRG.7545; |
| 12 StringTie exon      | 19281706 | 19281808 . | + | . | transcript_MSTRG.7545.2;gene_id | MSTRG.7545; |
| 12 StringTie transcrip | 19281434 | 19281810 . | + | . | transcript_MSTRG.7545.1;gene_id | MSTRG.7545; |
| 12 StringTie exon      | 19281434 | 19281597 . | + | . | transcript_MSTRG.7545.1;gene_id | MSTRG.7545; |
| 12 StringTie exon      | 19281652 | 19281810 . | + | . | transcript_MSTRG.7545.1;gene_id | MSTRG.7545; |
| 12 StringTie transcrip | 19281437 | 19281805 . | + | . | transcript_MSTRG.7545.5;gene_id | MSTRG.7545; |
| 12 StringTie exon      | 19281437 | 19281543 . | + | . | transcript_MSTRG.7545.5;gene_id | MSTRG.7545; |
| 12 StringTie exon      | 19281652 | 19281805 . | + | . | transcript_MSTRG.7545.5;gene_id | MSTRG.7545; |
| 12 StringTie transcrip | 19585735 | 19593103 . | + | . | transcript_MSTRG.7547.1;gene_id | MSTRG.7547; |
| 12 StringTie exon      | 19585735 | 19585838 . | + | . | transcript_MSTRG.7547.1;gene_id | MSTRG.7547; |
| 12 StringTie exon      | 19592985 | 19593103 . | + | . | transcript_MSTRG.7547.1;gene_id | MSTRG.7547; |
| 12 StringTie transcrip | 20005318 | 20020801 . | + | . | transcript_MSTRG.7577.1;gene_id | MSTRG.7577; |

|                         |          |          |   |   |   |                                 |             |
|-------------------------|----------|----------|---|---|---|---------------------------------|-------------|
| 12 StringTie exon       | 20005318 | 20005428 | . | + | . | transcript_MSTRG.7577.1;gene_id | MSTRG.7577; |
| 12 StringTie exon       | 20020691 | 20020801 | . | + | . | transcript_MSTRG.7577.1;gene_id | MSTRG.7577; |
| 12 StringTie transcript | 20499643 | 20502100 | . | + | . | transcript_MSTRG.7604.1;gene_id | MSTRG.7604; |
| 12 StringTie exon       | 20499643 | 20499717 | . | + | . | transcript_MSTRG.7604.1;gene_id | MSTRG.7604; |
| 12 StringTie exon       | 20499841 | 20500022 | . | + | . | transcript_MSTRG.7604.1;gene_id | MSTRG.7604; |
| 12 StringTie exon       | 20501403 | 20502100 | . | + | . | transcript_MSTRG.7604.1;gene_id | MSTRG.7604; |
| 12 StringTie transcript | 24292925 | 24294782 | . | + | . | transcript_MSTRG.7739.1;gene_id | MSTRG.7739; |
| 12 StringTie exon       | 24292925 | 24293168 | . | + | . | transcript_MSTRG.7739.1;gene_id | MSTRG.7739; |
| 12 StringTie exon       | 24294498 | 24294782 | . | + | . | transcript_MSTRG.7739.1;gene_id | MSTRG.7739; |
| 12 StringTie transcript | 24797739 | 24804764 | . | + | . | transcript_MSTRG.7745.1;gene_id | MSTRG.7745; |
| 12 StringTie exon       | 24797739 | 24797794 | . | + | . | transcript_MSTRG.7745.1;gene_id | MSTRG.7745; |
| 12 StringTie exon       | 24800373 | 24800499 | . | + | . | transcript_MSTRG.7745.1;gene_id | MSTRG.7745; |
| 12 StringTie exon       | 24804167 | 24804226 | . | + | . | transcript_MSTRG.7745.1;gene_id | MSTRG.7745; |
| 12 StringTie exon       | 24804653 | 24804764 | . | + | . | transcript_MSTRG.7745.1;gene_id | MSTRG.7745; |
| 12 StringTie transcript | 24800641 | 24805340 | . | + | . | transcript_MSTRG.7745.2;gene_id | MSTRG.7745; |
| 12 StringTie exon       | 24800641 | 24800920 | . | + | . | transcript_MSTRG.7745.2;gene_id | MSTRG.7745; |
| 12 StringTie exon       | 24804167 | 24804226 | . | + | . | transcript_MSTRG.7745.2;gene_id | MSTRG.7745; |
| 12 StringTie exon       | 24804653 | 24804718 | . | + | . | transcript_MSTRG.7745.2;gene_id | MSTRG.7745; |
| 12 StringTie exon       | 24805245 | 24805340 | . | + | . | transcript_MSTRG.7745.2;gene_id | MSTRG.7745; |
| 12 StringTie transcript | 26036268 | 26044566 | . | + | . | transcript_MSTRG.7789.1;gene_id | MSTRG.7789; |
| 12 StringTie exon       | 26036268 | 26036357 | . | + | . | transcript_MSTRG.7789.1;gene_id | MSTRG.7789; |
| 12 StringTie exon       | 26044333 | 26044566 | . | + | . | transcript_MSTRG.7789.1;gene_id | MSTRG.7789; |
| 12 StringTie transcript | 26379257 | 26379608 | . | + | . | transcript_MSTRG.7817.1;gene_id | MSTRG.7817; |
| 12 StringTie exon       | 26379257 | 26379411 | . | + | . | transcript_MSTRG.7817.1;gene_id | MSTRG.7817; |
| 12 StringTie exon       | 26379538 | 26379608 | . | + | . | transcript_MSTRG.7817.1;gene_id | MSTRG.7817; |
| 12 StringTie transcript | 26380476 | 26381764 | . | + | . | transcript_MSTRG.7818.1;gene_id | MSTRG.7818; |
| 12 StringTie exon       | 26380476 | 26380494 | . | + | . | transcript_MSTRG.7818.1;gene_id | MSTRG.7818; |
| 12 StringTie exon       | 26380515 | 26380670 | . | + | . | transcript_MSTRG.7818.1;gene_id | MSTRG.7818; |
| 12 StringTie exon       | 26380881 | 26380895 | . | + | . | transcript_MSTRG.7818.1;gene_id | MSTRG.7818; |
| 12 StringTie exon       | 26381654 | 26381764 | . | + | . | transcript_MSTRG.7818.1;gene_id | MSTRG.7818; |
| 12 StringTie transcript | 26381321 | 26381774 | . | + | . | transcript_MSTRG.7818.2;gene_id | MSTRG.7818; |
| 12 StringTie exon       | 26381321 | 26381431 | . | + | . | transcript_MSTRG.7818.2;gene_id | MSTRG.7818; |
| 12 StringTie exon       | 26381664 | 26381774 | . | + | . | transcript_MSTRG.7818.2;gene_id | MSTRG.7818; |
| 12 StringTie transcript | 27120590 | 27123790 | . | + | . | transcript_MSTRG.7843.1;gene_id | MSTRG.7843; |
| 12 StringTie exon       | 27120590 | 27120804 | . | + | . | transcript_MSTRG.7843.1;gene_id | MSTRG.7843; |



|                        |          |          |   |   |   |                                 |             |
|------------------------|----------|----------|---|---|---|---------------------------------|-------------|
| 12 StringTie exon      | 27123490 | 27123790 | . | + | . | transcript_MSTRG.7843.1;gene_id | MSTRG.7843; |
| 12 StringTie transcrip | 33212478 | 33214731 | . | + | . | transcript_MSTRG.7918.2;gene_id | MSTRG.7918; |
| 12 StringTie exon      | 33212478 | 33212828 | . | + | . | transcript_MSTRG.7918.2;gene_id | MSTRG.7918; |
| 12 StringTie exon      | 33214082 | 33214277 | . | + | . | transcript_MSTRG.7918.2;gene_id | MSTRG.7918; |
| 12 StringTie exon      | 33214584 | 33214731 | . | + | . | transcript_MSTRG.7918.2;gene_id | MSTRG.7918; |
| 12 StringTie transcrip | 33212478 | 33214731 | . | + | . | transcript_MSTRG.7918.1;gene_id | MSTRG.7918; |
| 12 StringTie exon      | 33212478 | 33214277 | . | + | . | transcript_MSTRG.7918.1;gene_id | MSTRG.7918; |
| 12 StringTie exon      | 33214584 | 33214731 | . | + | . | transcript_MSTRG.7918.1;gene_id | MSTRG.7918; |
| 12 StringTie transcrip | 33212479 | 33214725 | . | + | . | transcript_MSTRG.7918.3;gene_id | MSTRG.7918; |
| 12 StringTie exon      | 33212479 | 33212854 | . | + | . | transcript_MSTRG.7918.3;gene_id | MSTRG.7918; |
| 12 StringTie exon      | 33214082 | 33214277 | . | + | . | transcript_MSTRG.7918.3;gene_id | MSTRG.7918; |
| 12 StringTie exon      | 33214584 | 33214725 | . | + | . | transcript_MSTRG.7918.3;gene_id | MSTRG.7918; |
| 12 StringTie transcrip | 34285370 | 34286966 | . | + | . | transcript_MSTRG.7947.1;gene_id | MSTRG.7947; |
| 12 StringTie exon      | 34285370 | 34285434 | . | + | . | transcript_MSTRG.7947.1;gene_id | MSTRG.7947; |
| 12 StringTie exon      | 34285494 | 34286966 | . | + | . | transcript_MSTRG.7947.1;gene_id | MSTRG.7947; |
| 12 StringTie transcrip | 36256526 | 36308173 | . | + | . | transcript_MSTRG.7973.1;gene_id | MSTRG.7973; |
| 12 StringTie exon      | 36256526 | 36256592 | . | + | . | transcript_MSTRG.7973.1;gene_id | MSTRG.7973; |
| 12 StringTie exon      | 36257793 | 36257875 | . | + | . | transcript_MSTRG.7973.1;gene_id | MSTRG.7973; |
| 12 StringTie exon      | 36308045 | 36308173 | . | + | . | transcript_MSTRG.7973.1;gene_id | MSTRG.7973; |
| 12 StringTie transcrip | 38825046 | 38833501 | . | + | . | transcript_MSTRG.8034.1;gene_id | MSTRG.8034; |
| 12 StringTie exon      | 38825046 | 38825303 | . | + | . | transcript_MSTRG.8034.1;gene_id | MSTRG.8034; |
| 12 StringTie exon      | 38832089 | 38833501 | . | + | . | transcript_MSTRG.8034.1;gene_id | MSTRG.8034; |
| 12 StringTie transcrip | 39699364 | 39705587 | . | + | . | transcript_MSTRG.8066.1;gene_id | MSTRG.8066; |
| 12 StringTie exon      | 39699364 | 39700032 | . | + | . | transcript_MSTRG.8066.1;gene_id | MSTRG.8066; |
| 12 StringTie exon      | 39700344 | 39705587 | . | + | . | transcript_MSTRG.8066.1;gene_id | MSTRG.8066; |
| 12 StringTie transcrip | 42677070 | 42682234 | . | + | . | transcript_MSTRG.8108.1;gene_id | MSTRG.8108; |
| 12 StringTie exon      | 42677070 | 42677141 | . | + | . | transcript_MSTRG.8108.1;gene_id | MSTRG.8108; |
| 12 StringTie exon      | 42677558 | 42677676 | . | + | . | transcript_MSTRG.8108.1;gene_id | MSTRG.8108; |
| 12 StringTie exon      | 42681357 | 42682234 | . | + | . | transcript_MSTRG.8108.1;gene_id | MSTRG.8108; |
| 12 StringTie transcrip | 42980243 | 42982859 | . | + | . | transcript_MSTRG.8132.5;gene_id | MSTRG.8132; |
| 12 StringTie exon      | 42980243 | 42980617 | . | + | . | transcript_MSTRG.8132.5;gene_id | MSTRG.8132; |
| 12 StringTie exon      | 42982413 | 42982859 | . | + | . | transcript_MSTRG.8132.5;gene_id | MSTRG.8132; |
| 12 StringTie transcrip | 45703286 | 45768906 | . | + | . | transcript_MSTRG.8231.1;gene_id | MSTRG.8231; |
| 12 StringTie exon      | 45703286 | 45704016 | . | + | . | transcript_MSTRG.8231.1;gene_id | MSTRG.8231; |
| 12 StringTie exon      | 45768802 | 45768906 | . | + | . | transcript_MSTRG.8231.1;gene_id | MSTRG.8231; |

|                         |          |          |   |   |   |                                 |             |
|-------------------------|----------|----------|---|---|---|---------------------------------|-------------|
| 12 StringTie transcript | 46289884 | 46298881 | . | + | . | transcript_MSTRG.8265.1;gene_id | MSTRG.8265; |
| 12 StringTie exon       | 46289884 | 46290275 | . | + | . | transcript_MSTRG.8265.1;gene_id | MSTRG.8265; |
| 12 StringTie exon       | 46290637 | 46290744 | . | + | . | transcript_MSTRG.8265.1;gene_id | MSTRG.8265; |
| 12 StringTie exon       | 46294301 | 46294524 | . | + | . | transcript_MSTRG.8265.1;gene_id | MSTRG.8265; |
| 12 StringTie exon       | 46298788 | 46298881 | . | + | . | transcript_MSTRG.8265.1;gene_id | MSTRG.8265; |
| 12 StringTie transcript | 46643270 | 46648045 | . | + | . | transcript_MSTRG.8277.1;gene_id | MSTRG.8277; |
| 12 StringTie exon       | 46643270 | 46643418 | . | + | . | transcript_MSTRG.8277.1;gene_id | MSTRG.8277; |
| 12 StringTie exon       | 46647290 | 46648045 | . | + | . | transcript_MSTRG.8277.1;gene_id | MSTRG.8277; |
| 12 StringTie transcript | 48164442 | 48255350 | . | + | . | transcript_MSTRG.8329.1;gene_id | MSTRG.8329; |
| 12 StringTie exon       | 48164442 | 48165258 | . | + | . | transcript_MSTRG.8329.1;gene_id | MSTRG.8329; |
| 12 StringTie exon       | 48255257 | 48255350 | . | + | . | transcript_MSTRG.8329.1;gene_id | MSTRG.8329; |
| 12 StringTie transcript | 48199505 | 48204983 | . | + | . | transcript_MSTRG.8332.1;gene_id | MSTRG.8332; |
| 12 StringTie exon       | 48199505 | 48199562 | . | + | . | transcript_MSTRG.8332.1;gene_id | MSTRG.8332; |
| 12 StringTie exon       | 48202091 | 48202147 | . | + | . | transcript_MSTRG.8332.1;gene_id | MSTRG.8332; |
| 12 StringTie exon       | 48204629 | 48204983 | . | + | . | transcript_MSTRG.8332.1;gene_id | MSTRG.8332; |
| 12 StringTie transcript | 49780951 | 49781493 | . | + | . | transcript_MSTRG.8362.1;gene_id | MSTRG.8362; |
| 12 StringTie exon       | 49780951 | 49781060 | . | + | . | transcript_MSTRG.8362.1;gene_id | MSTRG.8362; |
| 12 StringTie exon       | 49781399 | 49781493 | . | + | . | transcript_MSTRG.8362.1;gene_id | MSTRG.8362; |
| 12 StringTie transcript | 49782873 | 49783715 | . | + | . | transcript_MSTRG.8363.1;gene_id | MSTRG.8363; |
| 12 StringTie exon       | 49782873 | 49782981 | . | + | . | transcript_MSTRG.8363.1;gene_id | MSTRG.8363; |
| 12 StringTie exon       | 49783606 | 49783715 | . | + | . | transcript_MSTRG.8363.1;gene_id | MSTRG.8363; |
| 12 StringTie transcript | 49783773 | 49784502 | . | + | . | transcript_MSTRG.8364.1;gene_id | MSTRG.8364; |
| 12 StringTie exon       | 49783773 | 49783857 | . | + | . | transcript_MSTRG.8364.1;gene_id | MSTRG.8364; |
| 12 StringTie exon       | 49784359 | 49784502 | . | + | . | transcript_MSTRG.8364.1;gene_id | MSTRG.8364; |
| 12 StringTie transcript | 49956819 | 49960464 | . | + | . | transcript_MSTRG.8366.1;gene_id | MSTRG.8366; |
| 12 StringTie exon       | 49956819 | 49956889 | . | + | . | transcript_MSTRG.8366.1;gene_id | MSTRG.8366; |
| 12 StringTie exon       | 49960083 | 49960464 | . | + | . | transcript_MSTRG.8366.1;gene_id | MSTRG.8366; |
| 12 StringTie transcript | 51985733 | 51996435 | . | + | . | transcript_MSTRG.8453.1;gene_id | MSTRG.8453; |
| 12 StringTie exon       | 51985733 | 51986992 | . | + | . | transcript_MSTRG.8453.1;gene_id | MSTRG.8453; |
| 12 StringTie exon       | 51990164 | 51990861 | . | + | . | transcript_MSTRG.8453.1;gene_id | MSTRG.8453; |
| 12 StringTie exon       | 51991141 | 51991413 | . | + | . | transcript_MSTRG.8453.1;gene_id | MSTRG.8453; |
| 12 StringTie exon       | 51995949 | 51996435 | . | + | . | transcript_MSTRG.8453.1;gene_id | MSTRG.8453; |
| 12 StringTie transcript | 51986666 | 51996433 | . | + | . | transcript_MSTRG.8453.2;gene_id | MSTRG.8453; |
| 12 StringTie exon       | 51986666 | 51986992 | . | + | . | transcript_MSTRG.8453.2;gene_id | MSTRG.8453; |
| 12 StringTie exon       | 51990164 | 51990275 | . | + | . | transcript_MSTRG.8453.2;gene_id | MSTRG.8453; |

|                         |          |            |   |   |                                 |             |
|-------------------------|----------|------------|---|---|---------------------------------|-------------|
| 12 StringTie exon       | 51991141 | 51991413 . | + | . | transcript_MSTRG.8453.2;gene_id | MSTRG.8453; |
| 12 StringTie exon       | 51995949 | 51996433 . | + | . | transcript_MSTRG.8453.2;gene_id | MSTRG.8453; |
| 12 StringTie transcript | 51986666 | 51996446 . | + | . | transcript_MSTRG.8453.3;gene_id | MSTRG.8453; |
| 12 StringTie exon       | 51986666 | 51986992 . | + | . | transcript_MSTRG.8453.3;gene_id | MSTRG.8453; |
| 12 StringTie exon       | 51991141 | 51991413 . | + | . | transcript_MSTRG.8453.3;gene_id | MSTRG.8453; |
| 12 StringTie exon       | 51995949 | 51996446 . | + | . | transcript_MSTRG.8453.3;gene_id | MSTRG.8453; |
| 12 StringTie transcript | 51986691 | 51996415 . | + | . | transcript_MSTRG.8453.5;gene_id | MSTRG.8453; |
| 12 StringTie exon       | 51986691 | 51986992 . | + | . | transcript_MSTRG.8453.5;gene_id | MSTRG.8453; |
| 12 StringTie exon       | 51989526 | 51989892 . | + | . | transcript_MSTRG.8453.5;gene_id | MSTRG.8453; |
| 12 StringTie exon       | 51990164 | 51990282 . | + | . | transcript_MSTRG.8453.5;gene_id | MSTRG.8453; |
| 12 StringTie exon       | 51991141 | 51991413 . | + | . | transcript_MSTRG.8453.5;gene_id | MSTRG.8453; |
| 12 StringTie exon       | 51995949 | 51996415 . | + | . | transcript_MSTRG.8453.5;gene_id | MSTRG.8453; |
| 12 StringTie transcript | 51986691 | 51996415 . | + | . | transcript_MSTRG.8453.4;gene_id | MSTRG.8453; |
| 12 StringTie exon       | 51986691 | 51986992 . | + | . | transcript_MSTRG.8453.4;gene_id | MSTRG.8453; |
| 12 StringTie exon       | 51995949 | 51996415 . | + | . | transcript_MSTRG.8453.4;gene_id | MSTRG.8453; |
| 12 StringTie transcript | 51987748 | 51996446 . | + | . | transcript_MSTRG.8453.6;gene_id | MSTRG.8453; |
| 12 StringTie exon       | 51987748 | 51989892 . | + | . | transcript_MSTRG.8453.6;gene_id | MSTRG.8453; |
| 12 StringTie exon       | 51990164 | 51990861 . | + | . | transcript_MSTRG.8453.6;gene_id | MSTRG.8453; |
| 12 StringTie exon       | 51991141 | 51991413 . | + | . | transcript_MSTRG.8453.6;gene_id | MSTRG.8453; |
| 12 StringTie exon       | 51995949 | 51996446 . | + | . | transcript_MSTRG.8453.6;gene_id | MSTRG.8453; |
| 12 StringTie transcript | 52596338 | 52596603 . | + | . | transcript_MSTRG.8494.1;gene_id | MSTRG.8494; |
| 12 StringTie exon       | 52596338 | 52596448 . | + | . | transcript_MSTRG.8494.1;gene_id | MSTRG.8494; |
| 12 StringTie exon       | 52596493 | 52596603 . | + | . | transcript_MSTRG.8494.1;gene_id | MSTRG.8494; |
| 12 StringTie transcript | 53166398 | 53168817 . | + | . | transcript_MSTRG.8607.2;gene_id | MSTRG.8607; |
| 12 StringTie exon       | 53166398 | 53166491 . | + | . | transcript_MSTRG.8607.2;gene_id | MSTRG.8607; |
| 12 StringTie exon       | 53168645 | 53168817 . | + | . | transcript_MSTRG.8607.2;gene_id | MSTRG.8607; |
| 12 StringTie transcript | 53166398 | 53176661 . | + | . | transcript_MSTRG.8607.1;gene_id | MSTRG.8607; |
| 12 StringTie exon       | 53166398 | 53166491 . | + | . | transcript_MSTRG.8607.1;gene_id | MSTRG.8607; |
| 12 StringTie exon       | 53170426 | 53170460 . | + | . | transcript_MSTRG.8607.1;gene_id | MSTRG.8607; |
| 12 StringTie exon       | 53176568 | 53176661 . | + | . | transcript_MSTRG.8607.1;gene_id | MSTRG.8607; |
| 12 StringTie transcript | 55052095 | 55192166 . | + | . | transcript_MSTRG.8729.1;gene_id | MSTRG.8729; |
| 12 StringTie exon       | 55052095 | 55052187 . | + | . | transcript_MSTRG.8729.1;gene_id | MSTRG.8729; |
| 12 StringTie exon       | 55138244 | 55138264 . | + | . | transcript_MSTRG.8729.1;gene_id | MSTRG.8729; |
| 12 StringTie exon       | 55192069 | 55192166 . | + | . | transcript_MSTRG.8729.1;gene_id | MSTRG.8729; |
| 12 StringTie transcript | 55052098 | 55192166 . | + | . | transcript_MSTRG.8729.2;gene_id | MSTRG.8729; |

|                         |          |            |   |   |                                  |             |
|-------------------------|----------|------------|---|---|----------------------------------|-------------|
| 12 StringTie exon       | 55052098 | 55052208 . | + | . | transcript_MSTRG.8729.2;gene_id  | MSTRG.8729; |
| 12 StringTie exon       | 55192069 | 55192166 . | + | . | transcript_MSTRG.8729.2;gene_id  | MSTRG.8729; |
| 12 StringTie transcript | 55065039 | 55262678 . | + | . | transcript_MSTRG.8729.3;gene_id  | MSTRG.8729; |
| 12 StringTie exon       | 55065039 | 55065130 . | + | . | transcript_MSTRG.8729.3;gene_id  | MSTRG.8729; |
| 12 StringTie exon       | 55235188 | 55235400 . | + | . | transcript_MSTRG.8729.3;gene_id  | MSTRG.8729; |
| 12 StringTie exon       | 55262605 | 55262678 . | + | . | transcript_MSTRG.8729.3;gene_id  | MSTRG.8729; |
| 12 StringTie transcript | 55138137 | 55236616 . | + | . | transcript_MSTRG.8729.4;gene_id  | MSTRG.8729; |
| 12 StringTie exon       | 55138137 | 55138243 . | + | . | transcript_MSTRG.8729.4;gene_id  | MSTRG.8729; |
| 12 StringTie exon       | 55228469 | 55228489 . | + | . | transcript_MSTRG.8729.4;gene_id  | MSTRG.8729; |
| 12 StringTie exon       | 55236506 | 55236616 . | + | . | transcript_MSTRG.8729.4;gene_id  | MSTRG.8729; |
| 12 StringTie transcript | 55146485 | 55236614 . | + | . | transcript_MSTRG.8729.7;gene_id  | MSTRG.8729; |
| 12 StringTie exon       | 55146485 | 55146523 . | + | . | transcript_MSTRG.8729.7;gene_id  | MSTRG.8729; |
| 12 StringTie exon       | 55200140 | 55200235 . | + | . | transcript_MSTRG.8729.7;gene_id  | MSTRG.8729; |
| 12 StringTie exon       | 55201141 | 55201243 . | + | . | transcript_MSTRG.8729.7;gene_id  | MSTRG.8729; |
| 12 StringTie exon       | 55236506 | 55236614 . | + | . | transcript_MSTRG.8729.7;gene_id  | MSTRG.8729; |
| 12 StringTie transcript | 55146501 | 55263349 . | + | . | transcript_MSTRG.8729.8;gene_id  | MSTRG.8729; |
| 12 StringTie exon       | 55146501 | 55146523 . | + | . | transcript_MSTRG.8729.8;gene_id  | MSTRG.8729; |
| 12 StringTie exon       | 55198894 | 55199052 . | + | . | transcript_MSTRG.8729.8;gene_id  | MSTRG.8729; |
| 12 StringTie exon       | 55262488 | 55262638 . | + | . | transcript_MSTRG.8729.8;gene_id  | MSTRG.8729; |
| 12 StringTie exon       | 55263275 | 55263349 . | + | . | transcript_MSTRG.8729.8;gene_id  | MSTRG.8729; |
| 12 StringTie transcript | 55191916 | 55230308 . | + | . | transcript_MSTRG.8729.9;gene_id  | MSTRG.8729; |
| 12 StringTie exon       | 55191916 | 55192026 . | + | . | transcript_MSTRG.8729.9;gene_id  | MSTRG.8729; |
| 12 StringTie exon       | 55228448 | 55228544 . | + | . | transcript_MSTRG.8729.9;gene_id  | MSTRG.8729; |
| 12 StringTie exon       | 55228635 | 55228737 . | + | . | transcript_MSTRG.8729.9;gene_id  | MSTRG.8729; |
| 12 StringTie exon       | 55229611 | 55229697 . | + | . | transcript_MSTRG.8729.9;gene_id  | MSTRG.8729; |
| 12 StringTie exon       | 55230205 | 55230308 . | + | . | transcript_MSTRG.8729.9;gene_id  | MSTRG.8729; |
| 12 StringTie transcript | 55191945 | 55256710 . | + | . | transcript_MSTRG.8729.10;gene_id | MSTRG.8729; |
| 12 StringTie exon       | 55191945 | 55192068 . | + | . | transcript_MSTRG.8729.10;gene_id | MSTRG.8729; |
| 12 StringTie exon       | 55256609 | 55256710 . | + | . | transcript_MSTRG.8729.10;gene_id | MSTRG.8729; |
| 12 StringTie transcript | 55193909 | 55229697 . | + | . | transcript_MSTRG.8729.11;gene_id | MSTRG.8729; |
| 12 StringTie exon       | 55193909 | 55194098 . | + | . | transcript_MSTRG.8729.11;gene_id | MSTRG.8729; |
| 12 StringTie exon       | 55194748 | 55194841 . | + | . | transcript_MSTRG.8729.11;gene_id | MSTRG.8729; |
| 12 StringTie exon       | 55229587 | 55229697 . | + | . | transcript_MSTRG.8729.11;gene_id | MSTRG.8729; |
| 12 StringTie transcript | 55194111 | 55230308 . | + | . | transcript_MSTRG.8729.12;gene_id | MSTRG.8729; |
| 12 StringTie exon       | 55194111 | 55194841 . | + | . | transcript_MSTRG.8729.12;gene_id | MSTRG.8729; |

|                         |          |          |   |   |   |                                 |             |
|-------------------------|----------|----------|---|---|---|---------------------------------|-------------|
| 12 StringTie exon       | 55229503 | 55229697 | . | + | . | transcript_MSTRG.8729.1;gene_id | MSTRG.8729; |
| 12 StringTie exon       | 55230205 | 55230308 | . | + | . | transcript_MSTRG.8729.1;gene_id | MSTRG.8729; |
| 12 StringTie transcript | 55198342 | 55262682 | . | + | . | transcript_MSTRG.8729.1;gene_id | MSTRG.8729; |
| 12 StringTie exon       | 55198342 | 55198956 | . | + | . | transcript_MSTRG.8729.1;gene_id | MSTRG.8729; |
| 12 StringTie exon       | 55235188 | 55235400 | . | + | . | transcript_MSTRG.8729.1;gene_id | MSTRG.8729; |
| 12 StringTie exon       | 55262605 | 55262682 | . | + | . | transcript_MSTRG.8729.1;gene_id | MSTRG.8729; |
| 12 StringTie transcript | 55198857 | 55234508 | . | + | . | transcript_MSTRG.8729.1;gene_id | MSTRG.8729; |
| 12 StringTie exon       | 55198857 | 55198956 | . | + | . | transcript_MSTRG.8729.1;gene_id | MSTRG.8729; |
| 12 StringTie exon       | 55234398 | 55234508 | . | + | . | transcript_MSTRG.8729.1;gene_id | MSTRG.8729; |
| 12 StringTie transcript | 55228075 | 55256710 | . | + | . | transcript_MSTRG.8729.1;gene_id | MSTRG.8729; |
| 12 StringTie exon       | 55228075 | 55228092 | . | + | . | transcript_MSTRG.8729.1;gene_id | MSTRG.8729; |
| 12 StringTie exon       | 55228364 | 55228489 | . | + | . | transcript_MSTRG.8729.1;gene_id | MSTRG.8729; |
| 12 StringTie exon       | 55256609 | 55256710 | . | + | . | transcript_MSTRG.8729.1;gene_id | MSTRG.8729; |
| 12 StringTie transcript | 55229479 | 55258101 | . | + | . | transcript_MSTRG.8729.1;gene_id | MSTRG.8729; |
| 12 StringTie exon       | 55229479 | 55229586 | . | + | . | transcript_MSTRG.8729.1;gene_id | MSTRG.8729; |
| 12 StringTie exon       | 55257920 | 55258101 | . | + | . | transcript_MSTRG.8729.1;gene_id | MSTRG.8729; |
| 12 StringTie transcript | 55234949 | 55263349 | . | + | . | transcript_MSTRG.8729.1;gene_id | MSTRG.8729; |
| 12 StringTie exon       | 55234949 | 55235187 | . | + | . | transcript_MSTRG.8729.1;gene_id | MSTRG.8729; |
| 12 StringTie exon       | 55262392 | 55262638 | . | + | . | transcript_MSTRG.8729.1;gene_id | MSTRG.8729; |
| 12 StringTie exon       | 55263275 | 55263349 | . | + | . | transcript_MSTRG.8729.1;gene_id | MSTRG.8729; |
| 12 StringTie transcript | 55145734 | 55199250 | . | + | . | transcript_MSTRG.8729.6;gene_id | MSTRG.8729; |
| 12 StringTie exon       | 55145734 | 55145889 | . | + | . | transcript_MSTRG.8729.6;gene_id | MSTRG.8729; |
| 12 StringTie exon       | 55199170 | 55199250 | . | + | . | transcript_MSTRG.8729.6;gene_id | MSTRG.8729; |
| 12 StringTie transcript | 55195760 | 55231028 | . | + | . | transcript_MSTRG.8730.1;gene_id | MSTRG.8730; |
| 12 StringTie exon       | 55195760 | 55195865 | . | + | . | transcript_MSTRG.8730.1;gene_id | MSTRG.8730; |
| 12 StringTie exon       | 55230919 | 55231028 | . | + | . | transcript_MSTRG.8730.1;gene_id | MSTRG.8730; |
| 12 StringTie transcript | 59159224 | 59167247 | . | + | . | transcript_MSTRG.8671.1;gene_id | MSTRG.8671; |
| 12 StringTie exon       | 59159224 | 59159339 | . | + | . | transcript_MSTRG.8671.1;gene_id | MSTRG.8671; |
| 12 StringTie exon       | 59167163 | 59167247 | . | + | . | transcript_MSTRG.8671.1;gene_id | MSTRG.8671; |
| 12 StringTie transcript | 59977665 | 59979208 | . | + | . | transcript_MSTRG.8705.1;gene_id | MSTRG.8705; |
| 12 StringTie exon       | 59977665 | 59977817 | . | + | . | transcript_MSTRG.8705.1;gene_id | MSTRG.8705; |
| 12 StringTie exon       | 59978085 | 59978320 | . | + | . | transcript_MSTRG.8705.1;gene_id | MSTRG.8705; |
| 12 StringTie exon       | 59978873 | 59979007 | . | + | . | transcript_MSTRG.8705.1;gene_id | MSTRG.8705; |
| 12 StringTie exon       | 59979105 | 59979208 | . | + | . | transcript_MSTRG.8705.1;gene_id | MSTRG.8705; |
| 12 StringTie transcript | 60012122 | 60021460 | . | + | . | transcript_MSTRG.8716.1;gene_id | MSTRG.8716; |

|                         |          |          |   |   |   |                                 |             |
|-------------------------|----------|----------|---|---|---|---------------------------------|-------------|
| 12 StringTie exon       | 60012122 | 60012144 | . | + | . | transcript_MSTRG.8716.1;gene_id | MSTRG.8716; |
| 12 StringTie exon       | 60014265 | 60014396 | . | + | . | transcript_MSTRG.8716.1;gene_id | MSTRG.8716; |
| 12 StringTie exon       | 60021398 | 60021460 | . | + | . | transcript_MSTRG.8716.1;gene_id | MSTRG.8716; |
| 12 StringTie transcript | 61310605 | 61315252 | . | + | . | transcript_MSTRG.8772.1;gene_id | MSTRG.8772; |
| 12 StringTie exon       | 61310605 | 61313627 | . | + | . | transcript_MSTRG.8772.1;gene_id | MSTRG.8772; |
| 12 StringTie exon       | 61314170 | 61315252 | . | + | . | transcript_MSTRG.8772.1;gene_id | MSTRG.8772; |
| 12 StringTie transcript | 61316106 | 61319102 | . | + | . | transcript_MSTRG.8774.1;gene_id | MSTRG.8774; |
| 12 StringTie exon       | 61316106 | 61316531 | . | + | . | transcript_MSTRG.8774.1;gene_id | MSTRG.8774; |
| 12 StringTie exon       | 61317831 | 61318087 | . | + | . | transcript_MSTRG.8774.1;gene_id | MSTRG.8774; |
| 12 StringTie exon       | 61318454 | 61318646 | . | + | . | transcript_MSTRG.8774.1;gene_id | MSTRG.8774; |
| 12 StringTie exon       | 61318927 | 61319102 | . | + | . | transcript_MSTRG.8774.1;gene_id | MSTRG.8774; |
| 12 StringTie transcript | 61316124 | 61319117 | . | + | . | transcript_MSTRG.8774.2;gene_id | MSTRG.8774; |
| 12 StringTie exon       | 61316124 | 61316531 | . | + | . | transcript_MSTRG.8774.2;gene_id | MSTRG.8774; |
| 12 StringTie exon       | 61317831 | 61318087 | . | + | . | transcript_MSTRG.8774.2;gene_id | MSTRG.8774; |
| 12 StringTie exon       | 61318454 | 61319117 | . | + | . | transcript_MSTRG.8774.2;gene_id | MSTRG.8774; |
| 12 StringTie transcript | 61316140 | 61319117 | . | + | . | transcript_MSTRG.8774.3;gene_id | MSTRG.8774; |
| 12 StringTie exon       | 61316140 | 61316531 | . | + | . | transcript_MSTRG.8774.3;gene_id | MSTRG.8774; |
| 12 StringTie exon       | 61317831 | 61318087 | . | + | . | transcript_MSTRG.8774.3;gene_id | MSTRG.8774; |
| 12 StringTie exon       | 61318454 | 61318646 | . | + | . | transcript_MSTRG.8774.3;gene_id | MSTRG.8774; |
| 12 StringTie exon       | 61318949 | 61319117 | . | + | . | transcript_MSTRG.8774.3;gene_id | MSTRG.8774; |
| 12 StringTie transcript | 790434   | 791809   | . | - | . | transcript_MSTRG.7033.1;gene_id | MSTRG.7033; |
| 12 StringTie exon       | 790434   | 790911   | . | - | . | transcript_MSTRG.7033.1;gene_id | MSTRG.7033; |
| 12 StringTie exon       | 791766   | 791809   | . | - | . | transcript_MSTRG.7033.1;gene_id | MSTRG.7033; |
| 12 StringTie transcript | 1045465  | 1055184  | . | - | . | transcript_MSTRG.7053.1;gene_id | MSTRG.7053; |
| 12 StringTie exon       | 1045465  | 1046930  | . | - | . | transcript_MSTRG.7053.1;gene_id | MSTRG.7053; |
| 12 StringTie exon       | 1049914  | 1050649  | . | - | . | transcript_MSTRG.7053.1;gene_id | MSTRG.7053; |
| 12 StringTie exon       | 1055027  | 1055184  | . | - | . | transcript_MSTRG.7053.1;gene_id | MSTRG.7053; |
| 12 StringTie transcript | 1431502  | 1432730  | . | - | . | transcript_MSTRG.7097.1;gene_id | MSTRG.7097; |
| 12 StringTie exon       | 1431502  | 1431786  | . | - | . | transcript_MSTRG.7097.1;gene_id | MSTRG.7097; |
| 12 StringTie exon       | 1432125  | 1432730  | . | - | . | transcript_MSTRG.7097.1;gene_id | MSTRG.7097; |
| 12 StringTie transcript | 4966510  | 4973244  | . | - | . | transcript_MSTRG.7180.1;gene_id | MSTRG.7180; |
| 12 StringTie exon       | 4966510  | 4968247  | . | - | . | transcript_MSTRG.7180.1;gene_id | MSTRG.7180; |
| 12 StringTie exon       | 4973205  | 4973244  | . | - | . | transcript_MSTRG.7180.1;gene_id | MSTRG.7180; |
| 12 StringTie transcript | 5436880  | 5463640  | . | - | . | transcript_MSTRG.7204.1;gene_id | MSTRG.7204; |
| 12 StringTie exon       | 5436880  | 5436906  | . | - | . | transcript_MSTRG.7204.1;gene_id | MSTRG.7204; |

|                        |          |            |     |                                 |             |
|------------------------|----------|------------|-----|---------------------------------|-------------|
| 12 StringTie exon      | 5462299  | 5463640 .  | - . | transcript_MSTRG.7204.1;gene_id | MSTRG.7204; |
| 12 StringTie transcrip | 5477874  | 5478189 .  | - . | transcript_MSTRG.7206.1;gene_id | MSTRG.7206; |
| 12 StringTie exon      | 5477874  | 5477984 .  | - . | transcript_MSTRG.7206.1;gene_id | MSTRG.7206; |
| 12 StringTie exon      | 5478096  | 5478189 .  | - . | transcript_MSTRG.7206.1;gene_id | MSTRG.7206; |
| 12 StringTie transcrip | 6151305  | 6161991 .  | - . | transcript_MSTRG.7233.1;gene_id | MSTRG.7233; |
| 12 StringTie exon      | 6151305  | 6151882 .  | - . | transcript_MSTRG.7233.1;gene_id | MSTRG.7233; |
| 12 StringTie exon      | 6157998  | 6158088 .  | - . | transcript_MSTRG.7233.1;gene_id | MSTRG.7233; |
| 12 StringTie exon      | 6158238  | 6158422 .  | - . | transcript_MSTRG.7233.1;gene_id | MSTRG.7233; |
| 12 StringTie exon      | 6160467  | 6160647 .  | - . | transcript_MSTRG.7233.1;gene_id | MSTRG.7233; |
| 12 StringTie exon      | 6161925  | 6161991 .  | - . | transcript_MSTRG.7233.1;gene_id | MSTRG.7233; |
| 12 StringTie transcrip | 7686260  | 7709960 .  | - . | transcript_MSTRG.7289.1;gene_id | MSTRG.7289; |
| 12 StringTie exon      | 7686260  | 7686533 .  | - . | transcript_MSTRG.7289.1;gene_id | MSTRG.7289; |
| 12 StringTie exon      | 7709937  | 7709960 .  | - . | transcript_MSTRG.7289.1;gene_id | MSTRG.7289; |
| 12 StringTie transcrip | 13458226 | 13459034 . | - . | transcript_MSTRG.7359.1;gene_id | MSTRG.7359; |
| 12 StringTie exon      | 13458226 | 13458697 . | - . | transcript_MSTRG.7359.1;gene_id | MSTRG.7359; |
| 12 StringTie exon      | 13459009 | 13459034 . | - . | transcript_MSTRG.7359.1;gene_id | MSTRG.7359; |
| 12 StringTie transcrip | 13678057 | 13680730 . | - . | transcript_MSTRG.7372.1;gene_id | MSTRG.7372; |
| 12 StringTie exon      | 13678057 | 13678220 . | - . | transcript_MSTRG.7372.1;gene_id | MSTRG.7372; |
| 12 StringTie exon      | 13680472 | 13680730 . | - . | transcript_MSTRG.7372.1;gene_id | MSTRG.7372; |
| 12 StringTie transcrip | 20388804 | 20389272 . | - . | transcript_MSTRG.7597.1;gene_id | MSTRG.7597; |
| 12 StringTie exon      | 20388804 | 20388913 . | - . | transcript_MSTRG.7597.1;gene_id | MSTRG.7597; |
| 12 StringTie exon      | 20389179 | 20389272 . | - . | transcript_MSTRG.7597.1;gene_id | MSTRG.7597; |
| 12 StringTie transcrip | 20932577 | 20933730 . | - . | transcript_MSTRG.7621.1;gene_id | MSTRG.7621; |
| 12 StringTie exon      | 20932577 | 20933661 . | - . | transcript_MSTRG.7621.1;gene_id | MSTRG.7621; |
| 12 StringTie exon      | 20933685 | 20933730 . | - . | transcript_MSTRG.7621.1;gene_id | MSTRG.7621; |
| 12 StringTie transcrip | 21928113 | 21962619 . | - . | transcript_MSTRG.7636.1;gene_id | MSTRG.7636; |
| 12 StringTie exon      | 21928113 | 21928151 . | - . | transcript_MSTRG.7636.1;gene_id | MSTRG.7636; |
| 12 StringTie exon      | 21961818 | 21962619 . | - . | transcript_MSTRG.7636.1;gene_id | MSTRG.7636; |
| 12 StringTie transcrip | 24167647 | 24192727 . | - . | transcript_MSTRG.7730.1;gene_id | MSTRG.7730; |
| 12 StringTie exon      | 24167647 | 24167770 . | - . | transcript_MSTRG.7730.1;gene_id | MSTRG.7730; |
| 12 StringTie exon      | 24174093 | 24174202 . | - . | transcript_MSTRG.7730.1;gene_id | MSTRG.7730; |
| 12 StringTie exon      | 24192665 | 24192727 . | - . | transcript_MSTRG.7730.1;gene_id | MSTRG.7730; |
| 12 StringTie transcrip | 24173095 | 24191585 . | - . | transcript_MSTRG.7730.2;gene_id | MSTRG.7730; |
| 12 StringTie exon      | 24173095 | 24173277 . | - . | transcript_MSTRG.7730.2;gene_id | MSTRG.7730; |
| 12 StringTie exon      | 24174093 | 24174202 . | - . | transcript_MSTRG.7730.2;gene_id | MSTRG.7730; |

|                        |          |          |   |   |   |                                 |             |
|------------------------|----------|----------|---|---|---|---------------------------------|-------------|
| 12 StringTie exon      | 24191450 | 24191585 | . | - | . | transcript_MSTRG.7730.2;gene_id | MSTRG.7730; |
| 12 StringTie transcrip | 24173112 | 24192706 | . | - | . | transcript_MSTRG.7730.3;gene_id | MSTRG.7730; |
| 12 StringTie exon      | 24173112 | 24173277 | . | - | . | transcript_MSTRG.7730.3;gene_id | MSTRG.7730; |
| 12 StringTie exon      | 24174093 | 24174202 | . | - | . | transcript_MSTRG.7730.3;gene_id | MSTRG.7730; |
| 12 StringTie exon      | 24192665 | 24192706 | . | - | . | transcript_MSTRG.7730.3;gene_id | MSTRG.7730; |
| 12 StringTie transcrip | 24739313 | 24739812 | . | - | . | transcript_MSTRG.7741.1;gene_id | MSTRG.7741; |
| 12 StringTie exon      | 24739313 | 24739435 | . | - | . | transcript_MSTRG.7741.1;gene_id | MSTRG.7741; |
| 12 StringTie exon      | 24739560 | 24739812 | . | - | . | transcript_MSTRG.7741.1;gene_id | MSTRG.7741; |
| 12 StringTie transcrip | 26364171 | 26367678 | . | - | . | transcript_MSTRG.7811.1;gene_id | MSTRG.7811; |
| 12 StringTie exon      | 26364171 | 26365114 | . | - | . | transcript_MSTRG.7811.1;gene_id | MSTRG.7811; |
| 12 StringTie exon      | 26366912 | 26367678 | . | - | . | transcript_MSTRG.7811.1;gene_id | MSTRG.7811; |
| 12 StringTie transcrip | 26606875 | 26622915 | . | - | . | transcript_MSTRG.7821.8;gene_id | MSTRG.7821; |
| 12 StringTie exon      | 26606875 | 26607221 | . | - | . | transcript_MSTRG.7821.8;gene_id | MSTRG.7821; |
| 12 StringTie exon      | 26607615 | 26607807 | . | - | . | transcript_MSTRG.7821.8;gene_id | MSTRG.7821; |
| 12 StringTie exon      | 26619942 | 26620170 | . | - | . | transcript_MSTRG.7821.8;gene_id | MSTRG.7821; |
| 12 StringTie exon      | 26622810 | 26622915 | . | - | . | transcript_MSTRG.7821.8;gene_id | MSTRG.7821; |
| 12 StringTie transcrip | 27434269 | 27439484 | . | - | . | transcript_MSTRG.7889.1;gene_id | MSTRG.7889; |
| 12 StringTie exon      | 27434269 | 27434749 | . | - | . | transcript_MSTRG.7889.1;gene_id | MSTRG.7889; |
| 12 StringTie exon      | 27439438 | 27439484 | . | - | . | transcript_MSTRG.7889.1;gene_id | MSTRG.7889; |
| 12 StringTie transcrip | 27434548 | 27440119 | . | - | . | transcript_MSTRG.7889.2;gene_id | MSTRG.7889; |
| 12 StringTie exon      | 27434548 | 27434749 | . | - | . | transcript_MSTRG.7889.2;gene_id | MSTRG.7889; |
| 12 StringTie exon      | 27440036 | 27440119 | . | - | . | transcript_MSTRG.7889.2;gene_id | MSTRG.7889; |
| 12 StringTie transcrip | 33152580 | 33160874 | . | - | . | transcript_MSTRG.7921.1;gene_id | MSTRG.7921; |
| 12 StringTie exon      | 33152580 | 33152598 | . | - | . | transcript_MSTRG.7921.1;gene_id | MSTRG.7921; |
| 12 StringTie exon      | 33160672 | 33160874 | . | - | . | transcript_MSTRG.7921.1;gene_id | MSTRG.7921; |
| 12 StringTie transcrip | 36424335 | 36434287 | . | - | . | transcript_MSTRG.7990.1;gene_id | MSTRG.7990; |
| 12 StringTie exon      | 36424335 | 36425024 | . | - | . | transcript_MSTRG.7990.1;gene_id | MSTRG.7990; |
| 12 StringTie exon      | 36426674 | 36426842 | . | - | . | transcript_MSTRG.7990.1;gene_id | MSTRG.7990; |
| 12 StringTie exon      | 36434253 | 36434287 | . | - | . | transcript_MSTRG.7990.1;gene_id | MSTRG.7990; |
| 12 StringTie transcrip | 39769058 | 39773647 | . | - | . | transcript_MSTRG.8069.1;gene_id | MSTRG.8069; |
| 12 StringTie exon      | 39769058 | 39769220 | . | - | . | transcript_MSTRG.8069.1;gene_id | MSTRG.8069; |
| 12 StringTie exon      | 39772169 | 39772251 | . | - | . | transcript_MSTRG.8069.1;gene_id | MSTRG.8069; |
| 12 StringTie exon      | 39772487 | 39772598 | . | - | . | transcript_MSTRG.8069.1;gene_id | MSTRG.8069; |
| 12 StringTie exon      | 39772982 | 39773647 | . | - | . | transcript_MSTRG.8069.1;gene_id | MSTRG.8069; |
| 12 StringTie transcrip | 40051483 | 40072824 | . | - | . | transcript_MSTRG.8078.1;gene_id | MSTRG.8078; |



|                         |          |          |   |   |   |                                 |             |
|-------------------------|----------|----------|---|---|---|---------------------------------|-------------|
| 12 StringTie exon       | 40051483 | 40051514 | . | - | . | transcript_MSTRG.8078.1;gene_id | MSTRG.8078; |
| 12 StringTie exon       | 40069575 | 40072824 | . | - | . | transcript_MSTRG.8078.1;gene_id | MSTRG.8078; |
| 12 StringTie transcript | 43319613 | 43321226 | . | - | . | transcript_MSTRG.8136.4;gene_id | MSTRG.8136; |
| 12 StringTie exon       | 43319613 | 43319931 | . | - | . | transcript_MSTRG.8136.4;gene_id | MSTRG.8136; |
| 12 StringTie exon       | 43320425 | 43320495 | . | - | . | transcript_MSTRG.8136.4;gene_id | MSTRG.8136; |
| 12 StringTie exon       | 43320873 | 43321226 | . | - | . | transcript_MSTRG.8136.4;gene_id | MSTRG.8136; |
| 12 StringTie transcript | 43319613 | 43322263 | . | - | . | transcript_MSTRG.8136.3;gene_id | MSTRG.8136; |
| 12 StringTie exon       | 43319613 | 43319931 | . | - | . | transcript_MSTRG.8136.3;gene_id | MSTRG.8136; |
| 12 StringTie exon       | 43320425 | 43320495 | . | - | . | transcript_MSTRG.8136.3;gene_id | MSTRG.8136; |
| 12 StringTie exon       | 43322136 | 43322263 | . | - | . | transcript_MSTRG.8136.3;gene_id | MSTRG.8136; |
| 12 StringTie transcript | 45998462 | 46015199 | . | - | . | transcript_MSTRG.8240.1;gene_id | MSTRG.8240; |
| 12 StringTie exon       | 45998462 | 45998765 | . | - | . | transcript_MSTRG.8240.1;gene_id | MSTRG.8240; |
| 12 StringTie exon       | 46015158 | 46015199 | . | - | . | transcript_MSTRG.8240.1;gene_id | MSTRG.8240; |
| 12 StringTie transcript | 47030526 | 47031233 | . | - | . | transcript_MSTRG.8281.1;gene_id | MSTRG.8281; |
| 12 StringTie exon       | 47030526 | 47030879 | . | - | . | transcript_MSTRG.8281.1;gene_id | MSTRG.8281; |
| 12 StringTie exon       | 47031141 | 47031233 | . | - | . | transcript_MSTRG.8281.1;gene_id | MSTRG.8281; |
| 12 StringTie transcript | 47554834 | 47570883 | . | - | . | transcript_MSTRG.8286.1;gene_id | MSTRG.8286; |
| 12 StringTie exon       | 47554834 | 47555128 | . | - | . | transcript_MSTRG.8286.1;gene_id | MSTRG.8286; |
| 12 StringTie exon       | 47555987 | 47556141 | . | - | . | transcript_MSTRG.8286.1;gene_id | MSTRG.8286; |
| 12 StringTie exon       | 47559981 | 47562255 | . | - | . | transcript_MSTRG.8286.1;gene_id | MSTRG.8286; |
| 12 StringTie exon       | 47563384 | 47563852 | . | - | . | transcript_MSTRG.8286.1;gene_id | MSTRG.8286; |
| 12 StringTie exon       | 47570750 | 47570883 | . | - | . | transcript_MSTRG.8286.1;gene_id | MSTRG.8286; |
| 12 StringTie transcript | 47559676 | 47562365 | . | - | . | transcript_MSTRG.8286.2;gene_id | MSTRG.8286; |
| 12 StringTie exon       | 47559676 | 47561420 | . | - | . | transcript_MSTRG.8286.2;gene_id | MSTRG.8286; |
| 12 StringTie exon       | 47562083 | 47562365 | . | - | . | transcript_MSTRG.8286.2;gene_id | MSTRG.8286; |
| 12 StringTie transcript | 50366377 | 50368577 | . | - | . | transcript_MSTRG.8379.1;gene_id | MSTRG.8379; |
| 12 StringTie exon       | 50366377 | 50366818 | . | - | . | transcript_MSTRG.8379.1;gene_id | MSTRG.8379; |
| 12 StringTie exon       | 50368489 | 50368577 | . | - | . | transcript_MSTRG.8379.1;gene_id | MSTRG.8379; |
| 12 StringTie transcript | 52315050 | 52342538 | . | - | . | transcript_MSTRG.8475.1;gene_id | MSTRG.8475; |
| 12 StringTie exon       | 52315050 | 52315262 | . | - | . | transcript_MSTRG.8475.1;gene_id | MSTRG.8475; |
| 12 StringTie exon       | 52318622 | 52318855 | . | - | . | transcript_MSTRG.8475.1;gene_id | MSTRG.8475; |
| 12 StringTie exon       | 52331935 | 52332213 | . | - | . | transcript_MSTRG.8475.1;gene_id | MSTRG.8475; |
| 12 StringTie exon       | 52341098 | 52341220 | . | - | . | transcript_MSTRG.8475.1;gene_id | MSTRG.8475; |
| 12 StringTie exon       | 52342449 | 52342538 | . | - | . | transcript_MSTRG.8475.1;gene_id | MSTRG.8475; |
| 12 StringTie transcript | 52414214 | 52416922 | . | - | . | transcript_MSTRG.8484.1;gene_id | MSTRG.8484; |

|                         |          |            |     |                                 |             |
|-------------------------|----------|------------|-----|---------------------------------|-------------|
| 12 StringTie exon       | 52414214 | 52414295 . | - . | transcript_MSTRG.8484.1;gene_id | MSTRG.8484; |
| 12 StringTie exon       | 52416410 | 52416922 . | - . | transcript_MSTRG.8484.1;gene_id | MSTRG.8484; |
| 12 StringTie transcript | 52420244 | 52424021 . | - . | transcript_MSTRG.8486.2;gene_id | MSTRG.8486; |
| 12 StringTie exon       | 52420244 | 52420370 . | - . | transcript_MSTRG.8486.2;gene_id | MSTRG.8486; |
| 12 StringTie exon       | 52420881 | 52421068 . | - . | transcript_MSTRG.8486.2;gene_id | MSTRG.8486; |
| 12 StringTie exon       | 52421536 | 52421804 . | - . | transcript_MSTRG.8486.2;gene_id | MSTRG.8486; |
| 12 StringTie exon       | 52423784 | 52424021 . | - . | transcript_MSTRG.8486.2;gene_id | MSTRG.8486; |
| 12 StringTie transcript | 52420244 | 52424405 . | - . | transcript_MSTRG.8486.1;gene_id | MSTRG.8486; |
| 12 StringTie exon       | 52420244 | 52420370 . | - . | transcript_MSTRG.8486.1;gene_id | MSTRG.8486; |
| 12 StringTie exon       | 52420881 | 52421068 . | - . | transcript_MSTRG.8486.1;gene_id | MSTRG.8486; |
| 12 StringTie exon       | 52421536 | 52421808 . | - . | transcript_MSTRG.8486.1;gene_id | MSTRG.8486; |
| 12 StringTie exon       | 52423784 | 52424405 . | - . | transcript_MSTRG.8486.1;gene_id | MSTRG.8486; |
| 12 StringTie transcript | 52434621 | 52435463 . | - . | transcript_MSTRG.8467.1;gene_id | MSTRG.8467; |
| 12 StringTie exon       | 52434621 | 52435016 . | - . | transcript_MSTRG.8467.1;gene_id | MSTRG.8467; |
| 12 StringTie exon       | 52435318 | 52435463 . | - . | transcript_MSTRG.8467.1;gene_id | MSTRG.8467; |
| 12 StringTie transcript | 52804702 | 52805131 . | - . | transcript_MSTRG.8584.1;gene_id | MSTRG.8584; |
| 12 StringTie exon       | 52804702 | 52804831 . | - . | transcript_MSTRG.8584.1;gene_id | MSTRG.8584; |
| 12 StringTie exon       | 52804916 | 52805131 . | - . | transcript_MSTRG.8584.1;gene_id | MSTRG.8584; |
| 12 StringTie transcript | 52804723 | 52805131 . | - . | transcript_MSTRG.8584.3;gene_id | MSTRG.8584; |
| 12 StringTie exon       | 52804723 | 52804873 . | - . | transcript_MSTRG.8584.3;gene_id | MSTRG.8584; |
| 12 StringTie exon       | 52805021 | 52805131 . | - . | transcript_MSTRG.8584.3;gene_id | MSTRG.8584; |
| 12 StringTie transcript | 52804723 | 52805131 . | - . | transcript_MSTRG.8584.2;gene_id | MSTRG.8584; |
| 12 StringTie exon       | 52804723 | 52804831 . | - . | transcript_MSTRG.8584.2;gene_id | MSTRG.8584; |
| 12 StringTie exon       | 52804916 | 52804957 . | - . | transcript_MSTRG.8584.2;gene_id | MSTRG.8584; |
| 12 StringTie exon       | 52805021 | 52805131 . | - . | transcript_MSTRG.8584.2;gene_id | MSTRG.8584; |
| 12 StringTie transcript | 53129872 | 53134306 . | - . | transcript_MSTRG.8604.4;gene_id | MSTRG.8604; |
| 12 StringTie exon       | 53129872 | 53131920 . | - . | transcript_MSTRG.8604.4;gene_id | MSTRG.8604; |
| 12 StringTie exon       | 53134259 | 53134306 . | - . | transcript_MSTRG.8604.4;gene_id | MSTRG.8604; |
| 12 StringTie transcript | 53420607 | 53422466 . | - . | transcript_MSTRG.8531.1;gene_id | MSTRG.8531; |
| 12 StringTie exon       | 53420607 | 53421665 . | - . | transcript_MSTRG.8531.1;gene_id | MSTRG.8531; |
| 12 StringTie exon       | 53422397 | 53422466 . | - . | transcript_MSTRG.8531.1;gene_id | MSTRG.8531; |
| 12 StringTie transcript | 57933166 | 58011767 . | - . | transcript_MSTRG.8648.1;gene_id | MSTRG.8648; |
| 12 StringTie exon       | 57933166 | 57933183 . | - . | transcript_MSTRG.8648.1;gene_id | MSTRG.8648; |
| 12 StringTie exon       | 57984453 | 57987977 . | - . | transcript_MSTRG.8648.1;gene_id | MSTRG.8648; |
| 12 StringTie exon       | 57999125 | 57999212 . | - . | transcript_MSTRG.8648.1;gene_id | MSTRG.8648; |

|                        |          |          |   |   |   |                                 |             |
|------------------------|----------|----------|---|---|---|---------------------------------|-------------|
| 12 StringTie exon      | 58011516 | 58011767 | . | - | . | transcript_MSTRG.8648.1;gene_id | MSTRG.8648; |
| 12 StringTie transcrip | 57985265 | 57997718 | . | - | . | transcript_MSTRG.8648.2;gene_id | MSTRG.8648; |
| 12 StringTie exon      | 57985265 | 57987977 | . | - | . | transcript_MSTRG.8648.2;gene_id | MSTRG.8648; |
| 12 StringTie exon      | 57994440 | 57997718 | . | - | . | transcript_MSTRG.8648.2;gene_id | MSTRG.8648; |
| 12 StringTie transcrip | 57985488 | 58011766 | . | - | . | transcript_MSTRG.8648.3;gene_id | MSTRG.8648; |
| 12 StringTie exon      | 57985488 | 57987977 | . | - | . | transcript_MSTRG.8648.3;gene_id | MSTRG.8648; |
| 12 StringTie exon      | 58011516 | 58011766 | . | - | . | transcript_MSTRG.8648.3;gene_id | MSTRG.8648; |
| 12 StringTie transcrip | 57985584 | 58004399 | . | - | . | transcript_MSTRG.8648.4;gene_id | MSTRG.8648; |
| 12 StringTie exon      | 57985584 | 57987977 | . | - | . | transcript_MSTRG.8648.4;gene_id | MSTRG.8648; |
| 12 StringTie exon      | 57999125 | 57999212 | . | - | . | transcript_MSTRG.8648.4;gene_id | MSTRG.8648; |
| 12 StringTie exon      | 58004005 | 58004399 | . | - | . | transcript_MSTRG.8648.4;gene_id | MSTRG.8648; |
| 12 StringTie transcrip | 57994445 | 58011748 | . | - | . | transcript_MSTRG.8648.5;gene_id | MSTRG.8648; |
| 12 StringTie exon      | 57994445 | 57994581 | . | - | . | transcript_MSTRG.8648.5;gene_id | MSTRG.8648; |
| 12 StringTie exon      | 57994878 | 57995096 | . | - | . | transcript_MSTRG.8648.5;gene_id | MSTRG.8648; |
| 12 StringTie exon      | 57999125 | 57999212 | . | - | . | transcript_MSTRG.8648.5;gene_id | MSTRG.8648; |
| 12 StringTie exon      | 58011516 | 58011748 | . | - | . | transcript_MSTRG.8648.5;gene_id | MSTRG.8648; |
| 12 StringTie transcrip | 59091630 | 59092017 | . | - | . | transcript_MSTRG.8659.1;gene_id | MSTRG.8659; |
| 12 StringTie exon      | 59091630 | 59091662 | . | - | . | transcript_MSTRG.8659.1;gene_id | MSTRG.8659; |
| 12 StringTie exon      | 59091768 | 59092017 | . | - | . | transcript_MSTRG.8659.1;gene_id | MSTRG.8659; |
| 12 StringTie transcrip | 59132604 | 59134605 | . | - | . | transcript_MSTRG.8665.2;gene_id | MSTRG.8665; |
| 12 StringTie exon      | 59132604 | 59132868 | . | - | . | transcript_MSTRG.8665.2;gene_id | MSTRG.8665; |
| 12 StringTie exon      | 59133101 | 59133181 | . | - | . | transcript_MSTRG.8665.2;gene_id | MSTRG.8665; |
| 12 StringTie exon      | 59133584 | 59133645 | . | - | . | transcript_MSTRG.8665.2;gene_id | MSTRG.8665; |
| 12 StringTie exon      | 59134067 | 59134117 | . | - | . | transcript_MSTRG.8665.2;gene_id | MSTRG.8665; |
| 12 StringTie exon      | 59134333 | 59134605 | . | - | . | transcript_MSTRG.8665.2;gene_id | MSTRG.8665; |
| 12 StringTie transcrip | 59132604 | 59134605 | . | - | . | transcript_MSTRG.8665.1;gene_id | MSTRG.8665; |
| 12 StringTie exon      | 59132604 | 59132868 | . | - | . | transcript_MSTRG.8665.1;gene_id | MSTRG.8665; |
| 12 StringTie exon      | 59133101 | 59133204 | . | - | . | transcript_MSTRG.8665.1;gene_id | MSTRG.8665; |
| 12 StringTie exon      | 59133584 | 59133645 | . | - | . | transcript_MSTRG.8665.1;gene_id | MSTRG.8665; |
| 12 StringTie exon      | 59134067 | 59134117 | . | - | . | transcript_MSTRG.8665.1;gene_id | MSTRG.8665; |
| 12 StringTie exon      | 59134333 | 59134605 | . | - | . | transcript_MSTRG.8665.1;gene_id | MSTRG.8665; |
| 12 StringTie transcrip | 60412857 | 60438387 | . | - | . | transcript_MSTRG.8742.1;gene_id | MSTRG.8742; |
| 12 StringTie exon      | 60412857 | 60412904 | . | - | . | transcript_MSTRG.8742.1;gene_id | MSTRG.8742; |
| 12 StringTie exon      | 60436960 | 60438387 | . | - | . | transcript_MSTRG.8742.1;gene_id | MSTRG.8742; |
| 12 StringTie transcrip | 61326207 | 61332394 | . | - | . | transcript_MSTRG.8776.1;gene_id | MSTRG.8776; |

|                        |          |          |   |   |   |                                 |             |
|------------------------|----------|----------|---|---|---|---------------------------------|-------------|
| 12 StringTie exon      | 61326207 | 61331314 | . | - | . | transcript_MSTRG.8776.1;gene_id | MSTRG.8776; |
| 12 StringTie exon      | 61332228 | 61332394 | . | - | . | transcript_MSTRG.8776.1;gene_id | MSTRG.8776; |
| 12 StringTie transcrip | 61326337 | 61332375 | . | - | . | transcript_MSTRG.8776.2;gene_id | MSTRG.8776; |
| 12 StringTie exon      | 61326337 | 61326899 | . | - | . | transcript_MSTRG.8776.2;gene_id | MSTRG.8776; |
| 12 StringTie exon      | 61332237 | 61332375 | . | - | . | transcript_MSTRG.8776.2;gene_id | MSTRG.8776; |
| 12 StringTie transcrip | 61326353 | 61332394 | . | - | . | transcript_MSTRG.8776.3;gene_id | MSTRG.8776; |
| 12 StringTie exon      | 61326353 | 61331314 | . | - | . | transcript_MSTRG.8776.3;gene_id | MSTRG.8776; |
| 12 StringTie exon      | 61332237 | 61332394 | . | - | . | transcript_MSTRG.8776.3;gene_id | MSTRG.8776; |
| 12 StringTie transcrip | 61327375 | 61329897 | . | - | . | transcript_MSTRG.8776.4;gene_id | MSTRG.8776; |
| 12 StringTie exon      | 61327375 | 61327726 | . | - | . | transcript_MSTRG.8776.4;gene_id | MSTRG.8776; |
| 12 StringTie exon      | 61329661 | 61329897 | . | - | . | transcript_MSTRG.8776.4;gene_id | MSTRG.8776; |
| 13 StringTie transcrip | 9844366  | 9884636  | . | + | . | transcript_MSTRG.8870.1;gene_id | MSTRG.8870; |
| 13 StringTie exon      | 9844366  | 9844612  | . | + | . | transcript_MSTRG.8870.1;gene_id | MSTRG.8870; |
| 13 StringTie exon      | 9851869  | 9851907  | . | + | . | transcript_MSTRG.8870.1;gene_id | MSTRG.8870; |
| 13 StringTie exon      | 9884290  | 9884636  | . | + | . | transcript_MSTRG.8870.1;gene_id | MSTRG.8870; |
| 13 StringTie transcrip | 9844366  | 9906449  | . | + | . | transcript_MSTRG.8870.2;gene_id | MSTRG.8870; |
| 13 StringTie exon      | 9844366  | 9844612  | . | + | . | transcript_MSTRG.8870.2;gene_id | MSTRG.8870; |
| 13 StringTie exon      | 9851869  | 9851907  | . | + | . | transcript_MSTRG.8870.2;gene_id | MSTRG.8870; |
| 13 StringTie exon      | 9905238  | 9905304  | . | + | . | transcript_MSTRG.8870.2;gene_id | MSTRG.8870; |
| 13 StringTie exon      | 9906300  | 9906449  | . | + | . | transcript_MSTRG.8870.2;gene_id | MSTRG.8870; |
| 13 StringTie transcrip | 9871287  | 9884636  | . | + | . | transcript_MSTRG.8870.3;gene_id | MSTRG.8870; |
| 13 StringTie exon      | 9871287  | 9872033  | . | + | . | transcript_MSTRG.8870.3;gene_id | MSTRG.8870; |
| 13 StringTie exon      | 9884290  | 9884636  | . | + | . | transcript_MSTRG.8870.3;gene_id | MSTRG.8870; |
| 13 StringTie transcrip | 18440025 | 18464102 | . | + | . | transcript_MSTRG.8980.1;gene_id | MSTRG.8980; |
| 13 StringTie exon      | 18440025 | 18440064 | . | + | . | transcript_MSTRG.8980.1;gene_id | MSTRG.8980; |
| 13 StringTie exon      | 18462005 | 18464102 | . | + | . | transcript_MSTRG.8980.1;gene_id | MSTRG.8980; |
| 13 StringTie transcrip | 18463133 | 18464074 | . | + | . | transcript_MSTRG.8980.2;gene_id | MSTRG.8980; |
| 13 StringTie exon      | 18463133 | 18463545 | . | + | . | transcript_MSTRG.8980.2;gene_id | MSTRG.8980; |
| 13 StringTie exon      | 18463587 | 18464074 | . | + | . | transcript_MSTRG.8980.2;gene_id | MSTRG.8980; |
| 13 StringTie transcrip | 23090344 | 23092641 | . | + | . | transcript_MSTRG.9067.1;gene_id | MSTRG.9067; |
| 13 StringTie exon      | 23090344 | 23092113 | . | + | . | transcript_MSTRG.9067.1;gene_id | MSTRG.9067; |
| 13 StringTie exon      | 23092411 | 23092641 | . | + | . | transcript_MSTRG.9067.1;gene_id | MSTRG.9067; |
| 13 StringTie transcrip | 27960044 | 27961986 | . | + | . | transcript_MSTRG.9196.1;gene_id | MSTRG.9196; |
| 13 StringTie exon      | 27960044 | 27960133 | . | + | . | transcript_MSTRG.9196.1;gene_id | MSTRG.9196; |
| 13 StringTie exon      | 27961811 | 27961986 | . | + | . | transcript_MSTRG.9196.1;gene_id | MSTRG.9196; |

|                         |          |          |   |   |   |                                 |             |
|-------------------------|----------|----------|---|---|---|---------------------------------|-------------|
| 13 StringTie transcript | 29996369 | 30000816 | . | + | . | transcript_MSTRG.9286.1;gene_id | MSTRG.9286; |
| 13 StringTie exon       | 29996369 | 29996758 | . | + | . | transcript_MSTRG.9286.1;gene_id | MSTRG.9286; |
| 13 StringTie exon       | 29997777 | 30000816 | . | + | . | transcript_MSTRG.9286.1;gene_id | MSTRG.9286; |
| 13 StringTie transcript | 30679421 | 30679725 | . | + | . | transcript_MSTRG.9315.1;gene_id | MSTRG.9315; |
| 13 StringTie exon       | 30679421 | 30679531 | . | + | . | transcript_MSTRG.9315.1;gene_id | MSTRG.9315; |
| 13 StringTie exon       | 30679616 | 30679725 | . | + | . | transcript_MSTRG.9315.1;gene_id | MSTRG.9315; |
| 13 StringTie transcript | 31951657 | 31957979 | . | + | . | transcript_MSTRG.9364.1;gene_id | MSTRG.9364; |
| 13 StringTie exon       | 31951657 | 31951678 | . | + | . | transcript_MSTRG.9364.1;gene_id | MSTRG.9364; |
| 13 StringTie exon       | 31957731 | 31957979 | . | + | . | transcript_MSTRG.9364.1;gene_id | MSTRG.9364; |
| 13 StringTie transcript | 32368390 | 32370365 | . | + | . | transcript_MSTRG.9382.1;gene_id | MSTRG.9382; |
| 13 StringTie exon       | 32368390 | 32368430 | . | + | . | transcript_MSTRG.9382.1;gene_id | MSTRG.9382; |
| 13 StringTie exon       | 32370053 | 32370365 | . | + | . | transcript_MSTRG.9382.1;gene_id | MSTRG.9382; |
| 13 StringTie transcript | 34100081 | 34101792 | . | + | . | transcript_MSTRG.9440.1;gene_id | MSTRG.9440; |
| 13 StringTie exon       | 34100081 | 34100799 | . | + | . | transcript_MSTRG.9440.1;gene_id | MSTRG.9440; |
| 13 StringTie exon       | 34101683 | 34101792 | . | + | . | transcript_MSTRG.9440.1;gene_id | MSTRG.9440; |
| 13 StringTie transcript | 37355369 | 37357443 | . | + | . | transcript_MSTRG.9485.1;gene_id | MSTRG.9485; |
| 13 StringTie exon       | 37355369 | 37355440 | . | + | . | transcript_MSTRG.9485.1;gene_id | MSTRG.9485; |
| 13 StringTie exon       | 37355575 | 37355673 | . | + | . | transcript_MSTRG.9485.1;gene_id | MSTRG.9485; |
| 13 StringTie exon       | 37356008 | 37357443 | . | + | . | transcript_MSTRG.9485.1;gene_id | MSTRG.9485; |
| 13 StringTie transcript | 40283029 | 40307104 | . | + | . | transcript_MSTRG.9569.1;gene_id | MSTRG.9569; |
| 13 StringTie exon       | 40283029 | 40285610 | . | + | . | transcript_MSTRG.9569.1;gene_id | MSTRG.9569; |
| 13 StringTie exon       | 40306565 | 40307104 | . | + | . | transcript_MSTRG.9569.1;gene_id | MSTRG.9569; |
| 13 StringTie transcript | 46075772 | 46099146 | . | + | . | transcript_MSTRG.9682.1;gene_id | MSTRG.9682; |
| 13 StringTie exon       | 46075772 | 46075828 | . | + | . | transcript_MSTRG.9682.1;gene_id | MSTRG.9682; |
| 13 StringTie exon       | 46083213 | 46083513 | . | + | . | transcript_MSTRG.9682.1;gene_id | MSTRG.9682; |
| 13 StringTie exon       | 46083588 | 46083648 | . | + | . | transcript_MSTRG.9682.1;gene_id | MSTRG.9682; |
| 13 StringTie exon       | 46087314 | 46087561 | . | + | . | transcript_MSTRG.9682.1;gene_id | MSTRG.9682; |
| 13 StringTie exon       | 46098917 | 46099146 | . | + | . | transcript_MSTRG.9682.1;gene_id | MSTRG.9682; |
| 13 StringTie transcript | 46087412 | 46090458 | . | + | . | transcript_MSTRG.9682.2;gene_id | MSTRG.9682; |
| 13 StringTie exon       | 46087412 | 46087561 | . | + | . | transcript_MSTRG.9682.2;gene_id | MSTRG.9682; |
| 13 StringTie exon       | 46090398 | 46090458 | . | + | . | transcript_MSTRG.9682.2;gene_id | MSTRG.9682; |
| 13 StringTie transcript | 46203909 | 46220914 | . | + | . | transcript_MSTRG.9683.1;gene_id | MSTRG.9683; |
| 13 StringTie exon       | 46203909 | 46204373 | . | + | . | transcript_MSTRG.9683.1;gene_id | MSTRG.9683; |
| 13 StringTie exon       | 46220630 | 46220914 | . | + | . | transcript_MSTRG.9683.1;gene_id | MSTRG.9683; |
| 13 StringTie transcript | 46203956 | 46232206 | . | + | . | transcript_MSTRG.9683.2;gene_id | MSTRG.9683; |

|                         |          |          |   |   |   |                                  |              |
|-------------------------|----------|----------|---|---|---|----------------------------------|--------------|
| 13 StringTie exon       | 46203956 | 46204373 | . | + | . | transcript_MSTRG.9683.2;gene_id  | MSTRG.9683;  |
| 13 StringTie exon       | 46231947 | 46232206 | . | + | . | transcript_MSTRG.9683.2;gene_id  | MSTRG.9683;  |
| 13 StringTie transcript | 46203962 | 46224622 | . | + | . | transcript_MSTRG.9683.4;gene_id  | MSTRG.9683;  |
| 13 StringTie exon       | 46203962 | 46204373 | . | + | . | transcript_MSTRG.9683.4;gene_id  | MSTRG.9683;  |
| 13 StringTie exon       | 46223478 | 46224622 | . | + | . | transcript_MSTRG.9683.4;gene_id  | MSTRG.9683;  |
| 13 StringTie transcript | 46203962 | 46403603 | . | + | . | transcript_MSTRG.9683.3;gene_id  | MSTRG.9683;  |
| 13 StringTie exon       | 46203962 | 46204373 | . | + | . | transcript_MSTRG.9683.3;gene_id  | MSTRG.9683;  |
| 13 StringTie exon       | 46363378 | 46363483 | . | + | . | transcript_MSTRG.9683.3;gene_id  | MSTRG.9683;  |
| 13 StringTie exon       | 46397675 | 46403603 | . | + | . | transcript_MSTRG.9683.3;gene_id  | MSTRG.9683;  |
| 13 StringTie transcript | 46203963 | 46277148 | . | + | . | transcript_MSTRG.9683.5;gene_id  | MSTRG.9683;  |
| 13 StringTie exon       | 46203963 | 46204373 | . | + | . | transcript_MSTRG.9683.5;gene_id  | MSTRG.9683;  |
| 13 StringTie exon       | 46275763 | 46277148 | . | + | . | transcript_MSTRG.9683.5;gene_id  | MSTRG.9683;  |
| 13 StringTie transcript | 46275380 | 46276990 | . | + | . | transcript_MSTRG.9683.6;gene_id  | MSTRG.9683;  |
| 13 StringTie exon       | 46275380 | 46275926 | . | + | . | transcript_MSTRG.9683.6;gene_id  | MSTRG.9683;  |
| 13 StringTie exon       | 46276625 | 46276990 | . | + | . | transcript_MSTRG.9683.6;gene_id  | MSTRG.9683;  |
| 13 StringTie transcript | 46314644 | 46315889 | . | + | . | transcript_MSTRG.9686.1;gene_id  | MSTRG.9686;  |
| 13 StringTie exon       | 46314644 | 46314698 | . | + | . | transcript_MSTRG.9686.1;gene_id  | MSTRG.9686;  |
| 13 StringTie exon       | 46315540 | 46315889 | . | + | . | transcript_MSTRG.9686.1;gene_id  | MSTRG.9686;  |
| 13 StringTie transcript | 47588197 | 47742843 | . | + | . | transcript_MSTRG.9698.1;gene_id  | MSTRG.9698;  |
| 13 StringTie exon       | 47588197 | 47588314 | . | + | . | transcript_MSTRG.9698.1;gene_id  | MSTRG.9698;  |
| 13 StringTie exon       | 47637664 | 47637775 | . | + | . | transcript_MSTRG.9698.1;gene_id  | MSTRG.9698;  |
| 13 StringTie exon       | 47741933 | 47742843 | . | + | . | transcript_MSTRG.9698.1;gene_id  | MSTRG.9698;  |
| 13 StringTie transcript | 52972171 | 53019403 | . | + | . | transcript_MSTRG.9820.1;gene_id  | MSTRG.9820;  |
| 13 StringTie exon       | 52972171 | 52972218 | . | + | . | transcript_MSTRG.9820.1;gene_id  | MSTRG.9820;  |
| 13 StringTie exon       | 53011726 | 53011920 | . | + | . | transcript_MSTRG.9820.1;gene_id  | MSTRG.9820;  |
| 13 StringTie exon       | 53014925 | 53015143 | . | + | . | transcript_MSTRG.9820.1;gene_id  | MSTRG.9820;  |
| 13 StringTie exon       | 53019380 | 53019403 | . | + | . | transcript_MSTRG.9820.1;gene_id  | MSTRG.9820;  |
| 13 StringTie transcript | 69591015 | 69594197 | . | + | . | transcript_MSTRG.10050.1;gene_id | MSTRG.10050; |
| 13 StringTie exon       | 69591015 | 69591564 | . | + | . | transcript_MSTRG.10050.1;gene_id | MSTRG.10050; |
| 13 StringTie exon       | 69594057 | 69594197 | . | + | . | transcript_MSTRG.10050.1;gene_id | MSTRG.10050; |
| 13 StringTie transcript | 71671925 | 71700661 | . | + | . | transcript_MSTRG.10082.1;gene_id | MSTRG.10082; |
| 13 StringTie exon       | 71671925 | 71672884 | . | + | . | transcript_MSTRG.10082.1;gene_id | MSTRG.10082; |
| 13 StringTie exon       | 71698782 | 71698923 | . | + | . | transcript_MSTRG.10082.1;gene_id | MSTRG.10082; |
| 13 StringTie exon       | 71699311 | 71700661 | . | + | . | transcript_MSTRG.10082.1;gene_id | MSTRG.10082; |
| 13 StringTie transcript | 71671925 | 71700661 | . | + | . | transcript_MSTRG.10082.1;gene_id | MSTRG.10082; |

|                         |          |          |   |   |   |                                 |              |
|-------------------------|----------|----------|---|---|---|---------------------------------|--------------|
| 13 StringTie exon       | 71671925 | 71672884 | . | + | . | transcript_MSTRG.10082.lgene_id | MSTRG.10082; |
| 13 StringTie exon       | 71698782 | 71700661 | . | + | . | transcript_MSTRG.10082.lgene_id | MSTRG.10082; |
| 13 StringTie transcript | 71671925 | 71701150 | . | + | . | transcript_MSTRG.10082.lgene_id | MSTRG.10082; |
| 13 StringTie exon       | 71671925 | 71672884 | . | + | . | transcript_MSTRG.10082.lgene_id | MSTRG.10082; |
| 13 StringTie exon       | 71679432 | 71679534 | . | + | . | transcript_MSTRG.10082.lgene_id | MSTRG.10082; |
| 13 StringTie exon       | 71698782 | 71701150 | . | + | . | transcript_MSTRG.10082.lgene_id | MSTRG.10082; |
| 13 StringTie transcript | 73256311 | 73259271 | . | + | . | transcript_MSTRG.10112.lgene_id | MSTRG.10112; |
| 13 StringTie exon       | 73256311 | 73257563 | . | + | . | transcript_MSTRG.10112.lgene_id | MSTRG.10112; |
| 13 StringTie exon       | 73259000 | 73259271 | . | + | . | transcript_MSTRG.10112.lgene_id | MSTRG.10112; |
| 13 StringTie transcript | 75843222 | 75845503 | . | + | . | transcript_MSTRG.10154.lgene_id | MSTRG.10154; |
| 13 StringTie exon       | 75843222 | 75843540 | . | + | . | transcript_MSTRG.10154.lgene_id | MSTRG.10154; |
| 13 StringTie exon       | 75843672 | 75843760 | . | + | . | transcript_MSTRG.10154.lgene_id | MSTRG.10154; |
| 13 StringTie exon       | 75844773 | 75845503 | . | + | . | transcript_MSTRG.10154.lgene_id | MSTRG.10154; |
| 13 StringTie transcript | 87732417 | 87736253 | . | + | . | transcript_MSTRG.10349.lgene_id | MSTRG.10349; |
| 13 StringTie exon       | 87732417 | 87732527 | . | + | . | transcript_MSTRG.10349.lgene_id | MSTRG.10349; |
| 13 StringTie exon       | 87732990 | 87733113 | . | + | . | transcript_MSTRG.10349.lgene_id | MSTRG.10349; |
| 13 StringTie exon       | 87733720 | 87736253 | . | + | . | transcript_MSTRG.10349.lgene_id | MSTRG.10349; |
| 13 StringTie transcript | 87732443 | 87735798 | . | + | . | transcript_MSTRG.10349.lgene_id | MSTRG.10349; |
| 13 StringTie exon       | 87732443 | 87732527 | . | + | . | transcript_MSTRG.10349.lgene_id | MSTRG.10349; |
| 13 StringTie exon       | 87733720 | 87735798 | . | + | . | transcript_MSTRG.10349.lgene_id | MSTRG.10349; |
| 13 StringTie transcript | 90857811 | 90859471 | . | + | . | transcript_MSTRG.10426.lgene_id | MSTRG.10426; |
| 13 StringTie exon       | 90857811 | 90858100 | . | + | . | transcript_MSTRG.10426.lgene_id | MSTRG.10426; |
| 13 StringTie exon       | 90858186 | 90859471 | . | + | . | transcript_MSTRG.10426.lgene_id | MSTRG.10426; |
| 13 StringTie transcript | 93051963 | 93054117 | . | + | . | transcript_MSTRG.10470.lgene_id | MSTRG.10470; |
| 13 StringTie exon       | 93051963 | 93052078 | . | + | . | transcript_MSTRG.10470.lgene_id | MSTRG.10470; |
| 13 StringTie exon       | 93052418 | 93052476 | . | + | . | transcript_MSTRG.10470.lgene_id | MSTRG.10470; |
| 13 StringTie exon       | 93053068 | 93054117 | . | + | . | transcript_MSTRG.10470.lgene_id | MSTRG.10470; |
| 13 StringTie transcript | 93051963 | 93054117 | . | + | . | transcript_MSTRG.10470.lgene_id | MSTRG.10470; |
| 13 StringTie exon       | 93051963 | 93052078 | . | + | . | transcript_MSTRG.10470.lgene_id | MSTRG.10470; |
| 13 StringTie exon       | 93052418 | 93052668 | . | + | . | transcript_MSTRG.10470.lgene_id | MSTRG.10470; |
| 13 StringTie exon       | 93053068 | 93054117 | . | + | . | transcript_MSTRG.10470.lgene_id | MSTRG.10470; |
| 13 StringTie transcript | 98463259 | 98464777 | . | + | . | transcript_MSTRG.10577.lgene_id | MSTRG.10577; |
| 13 StringTie exon       | 98463259 | 98463495 | . | + | . | transcript_MSTRG.10577.lgene_id | MSTRG.10577; |
| 13 StringTie exon       | 98464692 | 98464777 | . | + | . | transcript_MSTRG.10577.lgene_id | MSTRG.10577; |
| 13 StringTie transcript | 98463289 | 98474497 | . | + | . | transcript_MSTRG.10577.lgene_id | MSTRG.10577; |

|                         |           |           |   |   |   |                                 |              |
|-------------------------|-----------|-----------|---|---|---|---------------------------------|--------------|
| 13 StringTie exon       | 98463289  | 98463495  | . | + | . | transcript_MSTRG.10577.¿gene_id | MSTRG.10577; |
| 13 StringTie exon       | 98472454  | 98472670  | . | + | . | transcript_MSTRG.10577.¿gene_id | MSTRG.10577; |
| 13 StringTie exon       | 98474241  | 98474497  | . | + | . | transcript_MSTRG.10577.¿gene_id | MSTRG.10577; |
| 13 StringTie transcript | 99821133  | 99837891  | . | + | . | transcript_MSTRG.10581.¿gene_id | MSTRG.10581; |
| 13 StringTie exon       | 99821133  | 99821363  | . | + | . | transcript_MSTRG.10581.¿gene_id | MSTRG.10581; |
| 13 StringTie exon       | 99837613  | 99837891  | . | + | . | transcript_MSTRG.10581.¿gene_id | MSTRG.10581; |
| 13 StringTie transcript | 107711431 | 107732570 | . | + | . | transcript_MSTRG.10624.¿gene_id | MSTRG.10624; |
| 13 StringTie exon       | 107711431 | 107711666 | . | + | . | transcript_MSTRG.10624.¿gene_id | MSTRG.10624; |
| 13 StringTie exon       | 107731582 | 107731909 | . | + | . | transcript_MSTRG.10624.¿gene_id | MSTRG.10624; |
| 13 StringTie exon       | 107732053 | 107732570 | . | + | . | transcript_MSTRG.10624.¿gene_id | MSTRG.10624; |
| 13 StringTie transcript | 110054204 | 110156883 | . | + | . | transcript_MSTRG.10667.¿gene_id | MSTRG.10667; |
| 13 StringTie exon       | 110054204 | 110054293 | . | + | . | transcript_MSTRG.10667.¿gene_id | MSTRG.10667; |
| 13 StringTie exon       | 110054885 | 110054977 | . | + | . | transcript_MSTRG.10667.¿gene_id | MSTRG.10667; |
| 13 StringTie exon       | 110059394 | 110059566 | . | + | . | transcript_MSTRG.10667.¿gene_id | MSTRG.10667; |
| 13 StringTie exon       | 110135288 | 110135415 | . | + | . | transcript_MSTRG.10667.¿gene_id | MSTRG.10667; |
| 13 StringTie exon       | 110156827 | 110156883 | . | + | . | transcript_MSTRG.10667.¿gene_id | MSTRG.10667; |
| 13 StringTie transcript | 110054937 | 110088658 | . | + | . | transcript_MSTRG.10667.¿gene_id | MSTRG.10667; |
| 13 StringTie exon       | 110054937 | 110054977 | . | + | . | transcript_MSTRG.10667.¿gene_id | MSTRG.10667; |
| 13 StringTie exon       | 110059394 | 110059566 | . | + | . | transcript_MSTRG.10667.¿gene_id | MSTRG.10667; |
| 13 StringTie exon       | 110088415 | 110088658 | . | + | . | transcript_MSTRG.10667.¿gene_id | MSTRG.10667; |
| 13 StringTie transcript | 120626650 | 120714264 | . | + | . | transcript_MSTRG.10770.¿gene_id | MSTRG.10770; |
| 13 StringTie exon       | 120626650 | 120626743 | . | + | . | transcript_MSTRG.10770.¿gene_id | MSTRG.10770; |
| 13 StringTie exon       | 120703772 | 120703829 | . | + | . | transcript_MSTRG.10770.¿gene_id | MSTRG.10770; |
| 13 StringTie exon       | 120712278 | 120712413 | . | + | . | transcript_MSTRG.10770.¿gene_id | MSTRG.10770; |
| 13 StringTie exon       | 120714194 | 120714264 | . | + | . | transcript_MSTRG.10770.¿gene_id | MSTRG.10770; |
| 13 StringTie transcript | 120717804 | 120719319 | . | + | . | transcript_MSTRG.10773.¿gene_id | MSTRG.10773; |
| 13 StringTie exon       | 120717804 | 120718075 | . | + | . | transcript_MSTRG.10773.¿gene_id | MSTRG.10773; |
| 13 StringTie exon       | 120718604 | 120719319 | . | + | . | transcript_MSTRG.10773.¿gene_id | MSTRG.10773; |
| 13 StringTie transcript | 121378454 | 121431080 | . | + | . | transcript_MSTRG.10822.¿gene_id | MSTRG.10822; |
| 13 StringTie exon       | 121378454 | 121378660 | . | + | . | transcript_MSTRG.10822.¿gene_id | MSTRG.10822; |
| 13 StringTie exon       | 121386475 | 121387023 | . | + | . | transcript_MSTRG.10822.¿gene_id | MSTRG.10822; |
| 13 StringTie exon       | 121393206 | 121393363 | . | + | . | transcript_MSTRG.10822.¿gene_id | MSTRG.10822; |
| 13 StringTie exon       | 121394753 | 121394913 | . | + | . | transcript_MSTRG.10822.¿gene_id | MSTRG.10822; |
| 13 StringTie exon       | 121395151 | 121395291 | . | + | . | transcript_MSTRG.10822.¿gene_id | MSTRG.10822; |
| 13 StringTie exon       | 121398387 | 121398502 | . | + | . | transcript_MSTRG.10822.¿gene_id | MSTRG.10822; |



|                         |           |           |   |   |   |                                 |              |
|-------------------------|-----------|-----------|---|---|---|---------------------------------|--------------|
| 13 StringTie exon       | 121428671 | 121431080 | . | + | . | transcript_MSTRG.10822.lgene_id | MSTRG.10822; |
| 13 StringTie transcript | 125417977 | 125418465 | . | + | . | transcript_MSTRG.10922.lgene_id | MSTRG.10922; |
| 13 StringTie exon       | 125417977 | 125418108 | . | + | . | transcript_MSTRG.10922.lgene_id | MSTRG.10922; |
| 13 StringTie exon       | 125418380 | 125418465 | . | + | . | transcript_MSTRG.10922.lgene_id | MSTRG.10922; |
| 13 StringTie transcript | 129626983 | 129631365 | . | + | . | transcript_MSTRG.10963.lgene_id | MSTRG.10963; |
| 13 StringTie exon       | 129626983 | 129627069 | . | + | . | transcript_MSTRG.10963.lgene_id | MSTRG.10963; |
| 13 StringTie exon       | 129628196 | 129628455 | . | + | . | transcript_MSTRG.10963.lgene_id | MSTRG.10963; |
| 13 StringTie exon       | 129629808 | 129629867 | . | + | . | transcript_MSTRG.10963.lgene_id | MSTRG.10963; |
| 13 StringTie exon       | 129631129 | 129631365 | . | + | . | transcript_MSTRG.10963.lgene_id | MSTRG.10963; |
| 13 StringTie transcript | 129628354 | 129631918 | . | + | . | transcript_MSTRG.10963.lgene_id | MSTRG.10963; |
| 13 StringTie exon       | 129628354 | 129628455 | . | + | . | transcript_MSTRG.10963.lgene_id | MSTRG.10963; |
| 13 StringTie exon       | 129631129 | 129631285 | . | + | . | transcript_MSTRG.10963.lgene_id | MSTRG.10963; |
| 13 StringTie exon       | 129631833 | 129631918 | . | + | . | transcript_MSTRG.10963.lgene_id | MSTRG.10963; |
| 13 StringTie transcript | 132480175 | 132515188 | . | + | . | transcript_MSTRG.11007.lgene_id | MSTRG.11007; |
| 13 StringTie exon       | 132480175 | 132480221 | . | + | . | transcript_MSTRG.11007.lgene_id | MSTRG.11007; |
| 13 StringTie exon       | 132512016 | 132513368 | . | + | . | transcript_MSTRG.11007.lgene_id | MSTRG.11007; |
| 13 StringTie exon       | 132515079 | 132515188 | . | + | . | transcript_MSTRG.11007.lgene_id | MSTRG.11007; |
| 13 StringTie transcript | 135830354 | 135837592 | . | + | . | transcript_MSTRG.11106.lgene_id | MSTRG.11106; |
| 13 StringTie exon       | 135830354 | 135830422 | . | + | . | transcript_MSTRG.11106.lgene_id | MSTRG.11106; |
| 13 StringTie exon       | 135836787 | 135837592 | . | + | . | transcript_MSTRG.11106.lgene_id | MSTRG.11106; |
| 13 StringTie transcript | 136146165 | 136147195 | . | + | . | transcript_MSTRG.11109.lgene_id | MSTRG.11109; |
| 13 StringTie exon       | 136146165 | 136146241 | . | + | . | transcript_MSTRG.11109.lgene_id | MSTRG.11109; |
| 13 StringTie exon       | 136146737 | 136147195 | . | + | . | transcript_MSTRG.11109.lgene_id | MSTRG.11109; |
| 13 StringTie transcript | 144857906 | 144973584 | . | + | . | transcript_MSTRG.11281.lgene_id | MSTRG.11281; |
| 13 StringTie exon       | 144857906 | 144858087 | . | + | . | transcript_MSTRG.11281.lgene_id | MSTRG.11281; |
| 13 StringTie exon       | 144973562 | 144973584 | . | + | . | transcript_MSTRG.11281.lgene_id | MSTRG.11281; |
| 13 StringTie transcript | 144903637 | 145213807 | . | + | . | transcript_MSTRG.11281.lgene_id | MSTRG.11281; |
| 13 StringTie exon       | 144903637 | 144903764 | . | + | . | transcript_MSTRG.11281.lgene_id | MSTRG.11281; |
| 13 StringTie exon       | 145041194 | 145041245 | . | + | . | transcript_MSTRG.11281.lgene_id | MSTRG.11281; |
| 13 StringTie exon       | 145191075 | 145191148 | . | + | . | transcript_MSTRG.11281.lgene_id | MSTRG.11281; |
| 13 StringTie exon       | 145213606 | 145213807 | . | + | . | transcript_MSTRG.11281.lgene_id | MSTRG.11281; |
| 13 StringTie transcript | 146759583 | 146764963 | . | + | . | transcript_MSTRG.11309.lgene_id | MSTRG.11309; |
| 13 StringTie exon       | 146759583 | 146759856 | . | + | . | transcript_MSTRG.11309.lgene_id | MSTRG.11309; |
| 13 StringTie exon       | 146764727 | 146764963 | . | + | . | transcript_MSTRG.11309.lgene_id | MSTRG.11309; |
| 13 StringTie transcript | 146759583 | 146768463 | . | + | . | transcript_MSTRG.11309.lgene_id | MSTRG.11309; |

|                         |           |           |   |   |   |                         |          |              |
|-------------------------|-----------|-----------|---|---|---|-------------------------|----------|--------------|
| 13 StringTie exon       | 146759583 | 146763431 | . | + | . | transcript_MSTRG.11309. | lgene_id | MSTRG.11309; |
| 13 StringTie exon       | 146768302 | 146768463 | . | + | . | transcript_MSTRG.11309. | lgene_id | MSTRG.11309; |
| 13 StringTie transcript | 147900358 | 147901250 | . | + | . | transcript_MSTRG.11369. | lgene_id | MSTRG.11369; |
| 13 StringTie exon       | 147900358 | 147900386 | . | + | . | transcript_MSTRG.11369. | lgene_id | MSTRG.11369; |
| 13 StringTie exon       | 147900561 | 147901250 | . | + | . | transcript_MSTRG.11369. | lgene_id | MSTRG.11369; |
| 13 StringTie transcript | 167811339 | 167876290 | . | + | . | transcript_MSTRG.11522. | lgene_id | MSTRG.11522; |
| 13 StringTie exon       | 167811339 | 167811414 | . | + | . | transcript_MSTRG.11522. | lgene_id | MSTRG.11522; |
| 13 StringTie exon       | 167875565 | 167876290 | . | + | . | transcript_MSTRG.11522. | lgene_id | MSTRG.11522; |
| 13 StringTie transcript | 168575027 | 168644921 | . | + | . | transcript_MSTRG.11511. | lgene_id | MSTRG.11511; |
| 13 StringTie exon       | 168575027 | 168575065 | . | + | . | transcript_MSTRG.11511. | lgene_id | MSTRG.11511; |
| 13 StringTie exon       | 168580611 | 168580730 | . | + | . | transcript_MSTRG.11511. | lgene_id | MSTRG.11511; |
| 13 StringTie exon       | 168592440 | 168592481 | . | + | . | transcript_MSTRG.11511. | lgene_id | MSTRG.11511; |
| 13 StringTie exon       | 168618153 | 168618204 | . | + | . | transcript_MSTRG.11511. | lgene_id | MSTRG.11511; |
| 13 StringTie exon       | 168620707 | 168620729 | . | + | . | transcript_MSTRG.11511. | lgene_id | MSTRG.11511; |
| 13 StringTie exon       | 168644731 | 168644921 | . | + | . | transcript_MSTRG.11511. | lgene_id | MSTRG.11511; |
| 13 StringTie transcript | 180020600 | 180035548 | . | + | . | transcript_MSTRG.11671. | lgene_id | MSTRG.11671; |
| 13 StringTie exon       | 180020600 | 180020671 | . | + | . | transcript_MSTRG.11671. | lgene_id | MSTRG.11671; |
| 13 StringTie exon       | 180023402 | 180023584 | . | + | . | transcript_MSTRG.11671. | lgene_id | MSTRG.11671; |
| 13 StringTie exon       | 180027489 | 180027631 | . | + | . | transcript_MSTRG.11671. | lgene_id | MSTRG.11671; |
| 13 StringTie exon       | 180027889 | 180028249 | . | + | . | transcript_MSTRG.11671. | lgene_id | MSTRG.11671; |
| 13 StringTie exon       | 180029506 | 180029717 | . | + | . | transcript_MSTRG.11671. | lgene_id | MSTRG.11671; |
| 13 StringTie exon       | 180034384 | 180035548 | . | + | . | transcript_MSTRG.11671. | lgene_id | MSTRG.11671; |
| 13 StringTie transcript | 180023417 | 180035085 | . | + | . | transcript_MSTRG.11671. | lgene_id | MSTRG.11671; |
| 13 StringTie exon       | 180023417 | 180023584 | . | + | . | transcript_MSTRG.11671. | lgene_id | MSTRG.11671; |
| 13 StringTie exon       | 180027489 | 180027631 | . | + | . | transcript_MSTRG.11671. | lgene_id | MSTRG.11671; |
| 13 StringTie exon       | 180027808 | 180028249 | . | + | . | transcript_MSTRG.11671. | lgene_id | MSTRG.11671; |
| 13 StringTie exon       | 180029506 | 180029717 | . | + | . | transcript_MSTRG.11671. | lgene_id | MSTRG.11671; |
| 13 StringTie exon       | 180034384 | 180035085 | . | + | . | transcript_MSTRG.11671. | lgene_id | MSTRG.11671; |
| 13 StringTie transcript | 180027000 | 180035442 | . | + | . | transcript_MSTRG.11671. | lgene_id | MSTRG.11671; |
| 13 StringTie exon       | 180027000 | 180027058 | . | + | . | transcript_MSTRG.11671. | lgene_id | MSTRG.11671; |
| 13 StringTie exon       | 180027489 | 180027631 | . | + | . | transcript_MSTRG.11671. | lgene_id | MSTRG.11671; |
| 13 StringTie exon       | 180027808 | 180028249 | . | + | . | transcript_MSTRG.11671. | lgene_id | MSTRG.11671; |
| 13 StringTie exon       | 180029506 | 180029717 | . | + | . | transcript_MSTRG.11671. | lgene_id | MSTRG.11671; |
| 13 StringTie exon       | 180034384 | 180035442 | . | + | . | transcript_MSTRG.11671. | lgene_id | MSTRG.11671; |
| 13 StringTie transcript | 180803997 | 180844246 | . | + | . | transcript_MSTRG.11697. | lgene_id | MSTRG.11697; |

|                         |           |           |   |   |   |                         |          |              |
|-------------------------|-----------|-----------|---|---|---|-------------------------|----------|--------------|
| 13 StringTie exon       | 180803997 | 180804159 | . | + | . | transcript_MSTRG.11697. | lgene_id | MSTRG.11697; |
| 13 StringTie exon       | 180804274 | 180804376 | . | + | . | transcript_MSTRG.11697. | lgene_id | MSTRG.11697; |
| 13 StringTie exon       | 180844019 | 180844246 | . | + | . | transcript_MSTRG.11697. | lgene_id | MSTRG.11697; |
| 13 StringTie transcript | 181165625 | 181301470 | . | + | . | transcript_MSTRG.11741. | lgene_id | MSTRG.11741; |
| 13 StringTie exon       | 181165625 | 181165695 | . | + | . | transcript_MSTRG.11741. | lgene_id | MSTRG.11741; |
| 13 StringTie exon       | 181300807 | 181301470 | . | + | . | transcript_MSTRG.11741. | lgene_id | MSTRG.11741; |
| 13 StringTie transcript | 181188243 | 181302161 | . | + | . | transcript_MSTRG.11741. | lgene_id | MSTRG.11741; |
| 13 StringTie exon       | 181188243 | 181189997 | . | + | . | transcript_MSTRG.11741. | lgene_id | MSTRG.11741; |
| 13 StringTie exon       | 181246799 | 181246844 | . | + | . | transcript_MSTRG.11741. | lgene_id | MSTRG.11741; |
| 13 StringTie exon       | 181300807 | 181302161 | . | + | . | transcript_MSTRG.11741. | lgene_id | MSTRG.11741; |
| 13 StringTie transcript | 181189753 | 181246834 | . | + | . | transcript_MSTRG.11741. | lgene_id | MSTRG.11741; |
| 13 StringTie exon       | 181189753 | 181190113 | . | + | . | transcript_MSTRG.11741. | lgene_id | MSTRG.11741; |
| 13 StringTie exon       | 181246799 | 181246834 | . | + | . | transcript_MSTRG.11741. | lgene_id | MSTRG.11741; |
| 13 StringTie transcript | 181296806 | 181302170 | . | + | . | transcript_MSTRG.11741. | lgene_id | MSTRG.11741; |
| 13 StringTie exon       | 181296806 | 181299127 | . | + | . | transcript_MSTRG.11741. | lgene_id | MSTRG.11741; |
| 13 StringTie exon       | 181300807 | 181302170 | . | + | . | transcript_MSTRG.11741. | lgene_id | MSTRG.11741; |
| 13 StringTie transcript | 189994542 | 189997495 | . | + | . | transcript_MSTRG.11835. | lgene_id | MSTRG.11835; |
| 13 StringTie exon       | 189994542 | 189994607 | . | + | . | transcript_MSTRG.11835. | lgene_id | MSTRG.11835; |
| 13 StringTie exon       | 189997136 | 189997495 | . | + | . | transcript_MSTRG.11835. | lgene_id | MSTRG.11835; |
| 13 StringTie transcript | 190009831 | 190016417 | . | + | . | transcript_MSTRG.11836. | lgene_id | MSTRG.11836; |
| 13 StringTie exon       | 190009831 | 190011039 | . | + | . | transcript_MSTRG.11836. | lgene_id | MSTRG.11836; |
| 13 StringTie exon       | 190011986 | 190012071 | . | + | . | transcript_MSTRG.11836. | lgene_id | MSTRG.11836; |
| 13 StringTie exon       | 190012698 | 190012812 | . | + | . | transcript_MSTRG.11836. | lgene_id | MSTRG.11836; |
| 13 StringTie exon       | 190014822 | 190016417 | . | + | . | transcript_MSTRG.11836. | lgene_id | MSTRG.11836; |
| 13 StringTie transcript | 190024253 | 190030530 | . | + | . | transcript_MSTRG.11837. | lgene_id | MSTRG.11837; |
| 13 StringTie exon       | 190024253 | 190025055 | . | + | . | transcript_MSTRG.11837. | lgene_id | MSTRG.11837; |
| 13 StringTie exon       | 190030007 | 190030530 | . | + | . | transcript_MSTRG.11837. | lgene_id | MSTRG.11837; |
| 13 StringTie transcript | 196805626 | 196811036 | . | + | . | transcript_MSTRG.11905. | lgene_id | MSTRG.11905; |
| 13 StringTie exon       | 196805626 | 196807816 | . | + | . | transcript_MSTRG.11905. | lgene_id | MSTRG.11905; |
| 13 StringTie exon       | 196810899 | 196811036 | . | + | . | transcript_MSTRG.11905. | lgene_id | MSTRG.11905; |
| 13 StringTie transcript | 197445885 | 197455184 | . | + | . | transcript_MSTRG.11937. | lgene_id | MSTRG.11937; |
| 13 StringTie exon       | 197445885 | 197446039 | . | + | . | transcript_MSTRG.11937. | lgene_id | MSTRG.11937; |
| 13 StringTie exon       | 197454772 | 197455184 | . | + | . | transcript_MSTRG.11937. | lgene_id | MSTRG.11937; |
| 13 StringTie transcript | 197791226 | 197793959 | . | + | . | transcript_MSTRG.11918. | lgene_id | MSTRG.11918; |
| 13 StringTie exon       | 197791226 | 197791325 | . | + | . | transcript_MSTRG.11918. | lgene_id | MSTRG.11918; |

|                         |           |           |   |   |   |                                 |              |
|-------------------------|-----------|-----------|---|---|---|---------------------------------|--------------|
| 13 StringTie exon       | 197793251 | 197793959 | . | + | . | transcript_MSTRG.11918.lgene_id | MSTRG.11918; |
| 13 StringTie transcript | 207493903 | 207494436 | . | + | . | transcript_MSTRG.12060.lgene_id | MSTRG.12060; |
| 13 StringTie exon       | 207493903 | 207493966 | . | + | . | transcript_MSTRG.12060.lgene_id | MSTRG.12060; |
| 13 StringTie exon       | 207494031 | 207494224 | . | + | . | transcript_MSTRG.12060.lgene_id | MSTRG.12060; |
| 13 StringTie exon       | 207494327 | 207494436 | . | + | . | transcript_MSTRG.12060.lgene_id | MSTRG.12060; |
| 13 StringTie transcript | 3257326   | 3258467   | . | - | . | transcript_MSTRG.8824.lgene_id  | MSTRG.8824;  |
| 13 StringTie exon       | 3257326   | 3257508   | . | - | . | transcript_MSTRG.8824.lgene_id  | MSTRG.8824;  |
| 13 StringTie exon       | 3258365   | 3258467   | . | - | . | transcript_MSTRG.8824.lgene_id  | MSTRG.8824;  |
| 13 StringTie transcript | 3915559   | 3918648   | . | - | . | transcript_MSTRG.8858.lgene_id  | MSTRG.8858;  |
| 13 StringTie exon       | 3915559   | 3915724   | . | - | . | transcript_MSTRG.8858.lgene_id  | MSTRG.8858;  |
| 13 StringTie exon       | 3918603   | 3918648   | . | - | . | transcript_MSTRG.8858.lgene_id  | MSTRG.8858;  |
| 13 StringTie transcript | 11399146  | 11423381  | . | - | . | transcript_MSTRG.8891.lgene_id  | MSTRG.8891;  |
| 13 StringTie exon       | 11399146  | 11399898  | . | - | . | transcript_MSTRG.8891.lgene_id  | MSTRG.8891;  |
| 13 StringTie exon       | 11401284  | 11401324  | . | - | . | transcript_MSTRG.8891.lgene_id  | MSTRG.8891;  |
| 13 StringTie exon       | 11422487  | 11422652  | . | - | . | transcript_MSTRG.8891.lgene_id  | MSTRG.8891;  |
| 13 StringTie exon       | 11423279  | 11423381  | . | - | . | transcript_MSTRG.8891.lgene_id  | MSTRG.8891;  |
| 13 StringTie transcript | 21386550  | 21388006  | . | - | . | transcript_MSTRG.9013.lgene_id  | MSTRG.9013;  |
| 13 StringTie exon       | 21386550  | 21386644  | . | - | . | transcript_MSTRG.9013.lgene_id  | MSTRG.9013;  |
| 13 StringTie exon       | 21387893  | 21388006  | . | - | . | transcript_MSTRG.9013.lgene_id  | MSTRG.9013;  |
| 13 StringTie transcript | 21593973  | 21670366  | . | - | . | transcript_MSTRG.9029.lgene_id  | MSTRG.9029;  |
| 13 StringTie exon       | 21593973  | 21594054  | . | - | . | transcript_MSTRG.9029.lgene_id  | MSTRG.9029;  |
| 13 StringTie exon       | 21670091  | 21670366  | . | - | . | transcript_MSTRG.9029.lgene_id  | MSTRG.9029;  |
| 13 StringTie transcript | 24465923  | 24528245  | . | - | . | transcript_MSTRG.9109.lgene_id  | MSTRG.9109;  |
| 13 StringTie exon       | 24465923  | 24466010  | . | - | . | transcript_MSTRG.9109.lgene_id  | MSTRG.9109;  |
| 13 StringTie exon       | 24475450  | 24475580  | . | - | . | transcript_MSTRG.9109.lgene_id  | MSTRG.9109;  |
| 13 StringTie exon       | 24528144  | 24528245  | . | - | . | transcript_MSTRG.9109.lgene_id  | MSTRG.9109;  |
| 13 StringTie transcript | 34917268  | 34919484  | . | - | . | transcript_MSTRG.9510.lgene_id  | MSTRG.9510;  |
| 13 StringTie exon       | 34917268  | 34917441  | . | - | . | transcript_MSTRG.9510.lgene_id  | MSTRG.9510;  |
| 13 StringTie exon       | 34919393  | 34919484  | . | - | . | transcript_MSTRG.9510.lgene_id  | MSTRG.9510;  |
| 13 StringTie transcript | 43860799  | 43897210  | . | - | . | transcript_MSTRG.9641.lgene_id  | MSTRG.9641;  |
| 13 StringTie exon       | 43860799  | 43862423  | . | - | . | transcript_MSTRG.9641.lgene_id  | MSTRG.9641;  |
| 13 StringTie exon       | 43866883  | 43866961  | . | - | . | transcript_MSTRG.9641.lgene_id  | MSTRG.9641;  |
| 13 StringTie exon       | 43897065  | 43897210  | . | - | . | transcript_MSTRG.9641.lgene_id  | MSTRG.9641;  |
| 13 StringTie transcript | 47142930  | 47143389  | . | - | . | transcript_MSTRG.9707.lgene_id  | MSTRG.9707;  |
| 13 StringTie exon       | 47142930  | 47143241  | . | - | . | transcript_MSTRG.9707.lgene_id  | MSTRG.9707;  |

|                         |          |          |   |   |   |                                  |              |
|-------------------------|----------|----------|---|---|---|----------------------------------|--------------|
| 13 StringTie exon       | 47143348 | 47143389 | . | - | . | transcript_MSTRG.9707.1;gene_id  | MSTRG.9707;  |
| 13 StringTie transcript | 48667789 | 48691314 | . | - | . | transcript_MSTRG.9771.3;gene_id  | MSTRG.9771;  |
| 13 StringTie exon       | 48667789 | 48668198 | . | - | . | transcript_MSTRG.9771.3;gene_id  | MSTRG.9771;  |
| 13 StringTie exon       | 48691256 | 48691314 | . | - | . | transcript_MSTRG.9771.3;gene_id  | MSTRG.9771;  |
| 13 StringTie transcript | 60303142 | 60315765 | . | - | . | transcript_MSTRG.9866.1;gene_id  | MSTRG.9866;  |
| 13 StringTie exon       | 60303142 | 60303183 | . | - | . | transcript_MSTRG.9866.1;gene_id  | MSTRG.9866;  |
| 13 StringTie exon       | 60315509 | 60315765 | . | - | . | transcript_MSTRG.9866.1;gene_id  | MSTRG.9866;  |
| 13 StringTie transcript | 60404812 | 60555807 | . | - | . | transcript_MSTRG.9874.2;gene_id  | MSTRG.9874;  |
| 13 StringTie exon       | 60404812 | 60404884 | . | - | . | transcript_MSTRG.9874.2;gene_id  | MSTRG.9874;  |
| 13 StringTie exon       | 60496301 | 60496447 | . | - | . | transcript_MSTRG.9874.2;gene_id  | MSTRG.9874;  |
| 13 StringTie exon       | 60555753 | 60555807 | . | - | . | transcript_MSTRG.9874.2;gene_id  | MSTRG.9874;  |
| 13 StringTie transcript | 61368416 | 61375154 | . | - | . | transcript_MSTRG.9918.1;gene_id  | MSTRG.9918;  |
| 13 StringTie exon       | 61368416 | 61368539 | . | - | . | transcript_MSTRG.9918.1;gene_id  | MSTRG.9918;  |
| 13 StringTie exon       | 61369177 | 61369303 | . | - | . | transcript_MSTRG.9918.1;gene_id  | MSTRG.9918;  |
| 13 StringTie exon       | 61374652 | 61375154 | . | - | . | transcript_MSTRG.9918.1;gene_id  | MSTRG.9918;  |
| 13 StringTie transcript | 61368416 | 61375163 | . | - | . | transcript_MSTRG.9918.2;gene_id  | MSTRG.9918;  |
| 13 StringTie exon       | 61368416 | 61368536 | . | - | . | transcript_MSTRG.9918.2;gene_id  | MSTRG.9918;  |
| 13 StringTie exon       | 61369177 | 61369303 | . | - | . | transcript_MSTRG.9918.2;gene_id  | MSTRG.9918;  |
| 13 StringTie exon       | 61374652 | 61375163 | . | - | . | transcript_MSTRG.9918.2;gene_id  | MSTRG.9918;  |
| 13 StringTie transcript | 61435760 | 61439071 | . | - | . | transcript_MSTRG.9924.1;gene_id  | MSTRG.9924;  |
| 13 StringTie exon       | 61435760 | 61436722 | . | - | . | transcript_MSTRG.9924.1;gene_id  | MSTRG.9924;  |
| 13 StringTie exon       | 61438725 | 61439071 | . | - | . | transcript_MSTRG.9924.1;gene_id  | MSTRG.9924;  |
| 13 StringTie transcript | 61442833 | 61528398 | . | - | . | transcript_MSTRG.9886.1;gene_id  | MSTRG.9886;  |
| 13 StringTie exon       | 61442833 | 61443052 | . | - | . | transcript_MSTRG.9886.1;gene_id  | MSTRG.9886;  |
| 13 StringTie exon       | 61453739 | 61453804 | . | - | . | transcript_MSTRG.9886.1;gene_id  | MSTRG.9886;  |
| 13 StringTie exon       | 61488180 | 61488274 | . | - | . | transcript_MSTRG.9886.1;gene_id  | MSTRG.9886;  |
| 13 StringTie exon       | 61528354 | 61528398 | . | - | . | transcript_MSTRG.9886.1;gene_id  | MSTRG.9886;  |
| 13 StringTie transcript | 65731642 | 65750529 | . | - | . | transcript_MSTRG.9944.1;gene_id  | MSTRG.9944;  |
| 13 StringTie exon       | 65731642 | 65731857 | . | - | . | transcript_MSTRG.9944.1;gene_id  | MSTRG.9944;  |
| 13 StringTie exon       | 65750350 | 65750529 | . | - | . | transcript_MSTRG.9944.1;gene_id  | MSTRG.9944;  |
| 13 StringTie transcript | 70002166 | 70004600 | . | - | . | transcript_MSTRG.10057.1;gene_id | MSTRG.10057; |
| 13 StringTie exon       | 70002166 | 70003036 | . | - | . | transcript_MSTRG.10057.1;gene_id | MSTRG.10057; |
| 13 StringTie exon       | 70004441 | 70004600 | . | - | . | transcript_MSTRG.10057.1;gene_id | MSTRG.10057; |
| 13 StringTie transcript | 71908517 | 71917564 | . | - | . | transcript_MSTRG.10087.1;gene_id | MSTRG.10087; |
| 13 StringTie exon       | 71908517 | 71908626 | . | - | . | transcript_MSTRG.10087.1;gene_id | MSTRG.10087; |

|                         |           |           |   |   |   |                                 |              |
|-------------------------|-----------|-----------|---|---|---|---------------------------------|--------------|
| 13 StringTie exon       | 71913367  | 71913551  | . | - | . | transcript_MSTRG.10087.lgene_id | MSTRG.10087; |
| 13 StringTie exon       | 71916698  | 71916906  | . | - | . | transcript_MSTRG.10087.lgene_id | MSTRG.10087; |
| 13 StringTie exon       | 71917437  | 71917564  | . | - | . | transcript_MSTRG.10087.lgene_id | MSTRG.10087; |
| 13 StringTie transcript | 73407532  | 73421548  | . | - | . | transcript_MSTRG.10121.lgene_id | MSTRG.10121; |
| 13 StringTie exon       | 73407532  | 73408128  | . | - | . | transcript_MSTRG.10121.lgene_id | MSTRG.10121; |
| 13 StringTie exon       | 73421515  | 73421548  | . | - | . | transcript_MSTRG.10121.lgene_id | MSTRG.10121; |
| 13 StringTie transcript | 79138794  | 79139419  | . | - | . | transcript_MSTRG.10194.lgene_id | MSTRG.10194; |
| 13 StringTie exon       | 79138794  | 79139180  | . | - | . | transcript_MSTRG.10194.lgene_id | MSTRG.10194; |
| 13 StringTie exon       | 79139401  | 79139419  | . | - | . | transcript_MSTRG.10194.lgene_id | MSTRG.10194; |
| 13 StringTie transcript | 81422520  | 81425588  | . | - | . | transcript_MSTRG.10225.lgene_id | MSTRG.10225; |
| 13 StringTie exon       | 81422520  | 81422902  | . | - | . | transcript_MSTRG.10225.lgene_id | MSTRG.10225; |
| 13 StringTie exon       | 81425567  | 81425588  | . | - | . | transcript_MSTRG.10225.lgene_id | MSTRG.10225; |
| 13 StringTie transcript | 84631196  | 84634004  | . | - | . | transcript_MSTRG.10323.lgene_id | MSTRG.10323; |
| 13 StringTie exon       | 84631196  | 84631380  | . | - | . | transcript_MSTRG.10323.lgene_id | MSTRG.10323; |
| 13 StringTie exon       | 84632733  | 84634004  | . | - | . | transcript_MSTRG.10323.lgene_id | MSTRG.10323; |
| 13 StringTie transcript | 86259840  | 86328197  | . | - | . | transcript_MSTRG.10319.lgene_id | MSTRG.10319; |
| 13 StringTie exon       | 86259840  | 86261009  | . | - | . | transcript_MSTRG.10319.lgene_id | MSTRG.10319; |
| 13 StringTie exon       | 86275793  | 86275926  | . | - | . | transcript_MSTRG.10319.lgene_id | MSTRG.10319; |
| 13 StringTie exon       | 86328136  | 86328197  | . | - | . | transcript_MSTRG.10319.lgene_id | MSTRG.10319; |
| 13 StringTie transcript | 90244803  | 90273387  | . | - | . | transcript_MSTRG.10403.lgene_id | MSTRG.10403; |
| 13 StringTie exon       | 90244803  | 90245048  | . | - | . | transcript_MSTRG.10403.lgene_id | MSTRG.10403; |
| 13 StringTie exon       | 90248167  | 90248267  | . | - | . | transcript_MSTRG.10403.lgene_id | MSTRG.10403; |
| 13 StringTie exon       | 90249310  | 90249386  | . | - | . | transcript_MSTRG.10403.lgene_id | MSTRG.10403; |
| 13 StringTie exon       | 90251207  | 90251324  | . | - | . | transcript_MSTRG.10403.lgene_id | MSTRG.10403; |
| 13 StringTie exon       | 90273284  | 90273387  | . | - | . | transcript_MSTRG.10403.lgene_id | MSTRG.10403; |
| 13 StringTie transcript | 95227609  | 95234870  | . | - | . | transcript_MSTRG.10511.lgene_id | MSTRG.10511; |
| 13 StringTie exon       | 95227609  | 95231664  | . | - | . | transcript_MSTRG.10511.lgene_id | MSTRG.10511; |
| 13 StringTie exon       | 95231763  | 95231858  | . | - | . | transcript_MSTRG.10511.lgene_id | MSTRG.10511; |
| 13 StringTie exon       | 95234313  | 95234504  | . | - | . | transcript_MSTRG.10511.lgene_id | MSTRG.10511; |
| 13 StringTie exon       | 95234838  | 95234870  | . | - | . | transcript_MSTRG.10511.lgene_id | MSTRG.10511; |
| 13 StringTie transcript | 98175531  | 98195106  | . | - | . | transcript_MSTRG.10564.lgene_id | MSTRG.10564; |
| 13 StringTie exon       | 98175531  | 98175549  | . | - | . | transcript_MSTRG.10564.lgene_id | MSTRG.10564; |
| 13 StringTie exon       | 98194748  | 98195106  | . | - | . | transcript_MSTRG.10564.lgene_id | MSTRG.10564; |
| 13 StringTie transcript | 109338051 | 109347283 | . | - | . | transcript_MSTRG.10653.lgene_id | MSTRG.10653; |
| 13 StringTie exon       | 109338051 | 109338278 | . | - | . | transcript_MSTRG.10653.lgene_id | MSTRG.10653; |

|                        |           |           |   |   |   |                         |          |              |
|------------------------|-----------|-----------|---|---|---|-------------------------|----------|--------------|
| 13 StringTie exon      | 109347185 | 109347283 | . | - | . | transcript_MSTRG.10653. | lgene_id | MSTRG.10653; |
| 13 StringTie transcrip | 121549010 | 121559799 | . | - | . | transcript_MSTRG.10804. | lgene_id | MSTRG.10804; |
| 13 StringTie exon      | 121549010 | 121549714 | . | - | . | transcript_MSTRG.10804. | lgene_id | MSTRG.10804; |
| 13 StringTie exon      | 121558613 | 121558759 | . | - | . | transcript_MSTRG.10804. | lgene_id | MSTRG.10804; |
| 13 StringTie exon      | 121558929 | 121559011 | . | - | . | transcript_MSTRG.10804. | lgene_id | MSTRG.10804; |
| 13 StringTie exon      | 121559716 | 121559799 | . | - | . | transcript_MSTRG.10804. | lgene_id | MSTRG.10804; |
| 13 StringTie transcrip | 121549010 | 121559799 | . | - | . | transcript_MSTRG.10804. | lgene_id | MSTRG.10804; |
| 13 StringTie exon      | 121549010 | 121549714 | . | - | . | transcript_MSTRG.10804. | lgene_id | MSTRG.10804; |
| 13 StringTie exon      | 121558929 | 121559011 | . | - | . | transcript_MSTRG.10804. | lgene_id | MSTRG.10804; |
| 13 StringTie exon      | 121559716 | 121559799 | . | - | . | transcript_MSTRG.10804. | lgene_id | MSTRG.10804; |
| 13 StringTie transcrip | 124915819 | 124938420 | . | - | . | transcript_MSTRG.10897. | lgene_id | MSTRG.10897; |
| 13 StringTie exon      | 124915819 | 124915981 | . | - | . | transcript_MSTRG.10897. | lgene_id | MSTRG.10897; |
| 13 StringTie exon      | 124932804 | 124932984 | . | - | . | transcript_MSTRG.10897. | lgene_id | MSTRG.10897; |
| 13 StringTie exon      | 124938368 | 124938420 | . | - | . | transcript_MSTRG.10897. | lgene_id | MSTRG.10897; |
| 13 StringTie transcrip | 132153049 | 132154165 | . | - | . | transcript_MSTRG.10994. | lgene_id | MSTRG.10994; |
| 13 StringTie exon      | 132153049 | 132153448 | . | - | . | transcript_MSTRG.10994. | lgene_id | MSTRG.10994; |
| 13 StringTie exon      | 132154038 | 132154165 | . | - | . | transcript_MSTRG.10994. | lgene_id | MSTRG.10994; |
| 13 StringTie transcrip | 133968404 | 133970512 | . | - | . | transcript_MSTRG.11041. | lgene_id | MSTRG.11041; |
| 13 StringTie exon      | 133968404 | 133970038 | . | - | . | transcript_MSTRG.11041. | lgene_id | MSTRG.11041; |
| 13 StringTie exon      | 133970426 | 133970512 | . | - | . | transcript_MSTRG.11041. | lgene_id | MSTRG.11041; |
| 13 StringTie transcrip | 133968965 | 133970497 | . | - | . | transcript_MSTRG.11041. | lgene_id | MSTRG.11041; |
| 13 StringTie exon      | 133968965 | 133970038 | . | - | . | transcript_MSTRG.11041. | lgene_id | MSTRG.11041; |
| 13 StringTie exon      | 133970421 | 133970497 | . | - | . | transcript_MSTRG.11041. | lgene_id | MSTRG.11041; |
| 13 StringTie transcrip | 133969421 | 133970490 | . | - | . | transcript_MSTRG.11041. | lgene_id | MSTRG.11041; |
| 13 StringTie exon      | 133969421 | 133970038 | . | - | . | transcript_MSTRG.11041. | lgene_id | MSTRG.11041; |
| 13 StringTie exon      | 133970393 | 133970490 | . | - | . | transcript_MSTRG.11041. | lgene_id | MSTRG.11041; |
| 13 StringTie transcrip | 134473249 | 134515125 | . | - | . | transcript_MSTRG.11052. | lgene_id | MSTRG.11052; |
| 13 StringTie exon      | 134473249 | 134473270 | . | - | . | transcript_MSTRG.11052. | lgene_id | MSTRG.11052; |
| 13 StringTie exon      | 134514545 | 134515125 | . | - | . | transcript_MSTRG.11052. | lgene_id | MSTRG.11052; |
| 13 StringTie transcrip | 136962454 | 136964198 | . | - | . | transcript_MSTRG.11099. | lgene_id | MSTRG.11099; |
| 13 StringTie exon      | 136962454 | 136962740 | . | - | . | transcript_MSTRG.11099. | lgene_id | MSTRG.11099; |
| 13 StringTie exon      | 136963643 | 136964198 | . | - | . | transcript_MSTRG.11099. | lgene_id | MSTRG.11099; |
| 13 StringTie transcrip | 138049498 | 138101645 | . | - | . | transcript_MSTRG.11137. | lgene_id | MSTRG.11137; |
| 13 StringTie exon      | 138049498 | 138054287 | . | - | . | transcript_MSTRG.11137. | lgene_id | MSTRG.11137; |
| 13 StringTie exon      | 138101550 | 138101645 | . | - | . | transcript_MSTRG.11137. | lgene_id | MSTRG.11137; |

|                         |           |           |   |   |   |                         |          |              |
|-------------------------|-----------|-----------|---|---|---|-------------------------|----------|--------------|
| 13 StringTie transcript | 146269557 | 146274975 | . | - | . | transcript_MSTRG.11301. | lgene_id | MSTRG.11301; |
| 13 StringTie exon       | 146269557 | 146270697 | . | - | . | transcript_MSTRG.11301. | lgene_id | MSTRG.11301; |
| 13 StringTie exon       | 146274865 | 146274975 | . | - | . | transcript_MSTRG.11301. | lgene_id | MSTRG.11301; |
| 13 StringTie transcript | 159185247 | 159187576 | . | - | . | transcript_MSTRG.11443. | lgene_id | MSTRG.11443; |
| 13 StringTie exon       | 159185247 | 159185338 | . | - | . | transcript_MSTRG.11443. | lgene_id | MSTRG.11443; |
| 13 StringTie exon       | 159185370 | 159187576 | . | - | . | transcript_MSTRG.11443. | lgene_id | MSTRG.11443; |
| 13 StringTie transcript | 173471225 | 173583018 | . | - | . | transcript_MSTRG.11618. | lgene_id | MSTRG.11618; |
| 13 StringTie exon       | 173471225 | 173471548 | . | - | . | transcript_MSTRG.11618. | lgene_id | MSTRG.11618; |
| 13 StringTie exon       | 173566185 | 173566283 | . | - | . | transcript_MSTRG.11618. | lgene_id | MSTRG.11618; |
| 13 StringTie exon       | 173582911 | 173583018 | . | - | . | transcript_MSTRG.11618. | lgene_id | MSTRG.11618; |
| 13 StringTie transcript | 180200594 | 180209870 | . | - | . | transcript_MSTRG.11680. | lgene_id | MSTRG.11680; |
| 13 StringTie exon       | 180200594 | 180201073 | . | - | . | transcript_MSTRG.11680. | lgene_id | MSTRG.11680; |
| 13 StringTie exon       | 180207610 | 180208616 | . | - | . | transcript_MSTRG.11680. | lgene_id | MSTRG.11680; |
| 13 StringTie exon       | 180209737 | 180209870 | . | - | . | transcript_MSTRG.11680. | lgene_id | MSTRG.11680; |
| 13 StringTie transcript | 180201684 | 180208618 | . | - | . | transcript_MSTRG.11680. | lgene_id | MSTRG.11680; |
| 13 StringTie exon       | 180201684 | 180201859 | . | - | . | transcript_MSTRG.11680. | lgene_id | MSTRG.11680; |
| 13 StringTie exon       | 180207610 | 180208618 | . | - | . | transcript_MSTRG.11680. | lgene_id | MSTRG.11680; |
| 13 StringTie transcript | 188919729 | 188922691 | . | - | . | transcript_MSTRG.11806. | lgene_id | MSTRG.11806; |
| 13 StringTie exon       | 188919729 | 188919790 | . | - | . | transcript_MSTRG.11806. | lgene_id | MSTRG.11806; |
| 13 StringTie exon       | 188920480 | 188920625 | . | - | . | transcript_MSTRG.11806. | lgene_id | MSTRG.11806; |
| 13 StringTie exon       | 188922624 | 188922691 | . | - | . | transcript_MSTRG.11806. | lgene_id | MSTRG.11806; |
| 13 StringTie transcript | 195290972 | 195326318 | . | - | . | transcript_MSTRG.11871. | lgene_id | MSTRG.11871; |
| 13 StringTie exon       | 195290972 | 195291321 | . | - | . | transcript_MSTRG.11871. | lgene_id | MSTRG.11871; |
| 13 StringTie exon       | 195300700 | 195300809 | . | - | . | transcript_MSTRG.11871. | lgene_id | MSTRG.11871; |
| 13 StringTie exon       | 195326264 | 195326318 | . | - | . | transcript_MSTRG.11871. | lgene_id | MSTRG.11871; |
| 13 StringTie transcript | 196128839 | 196137201 | . | - | . | transcript_MSTRG.11884. | lgene_id | MSTRG.11884; |
| 13 StringTie exon       | 196128839 | 196129028 | . | - | . | transcript_MSTRG.11884. | lgene_id | MSTRG.11884; |
| 13 StringTie exon       | 196137133 | 196137201 | . | - | . | transcript_MSTRG.11884. | lgene_id | MSTRG.11884; |
| 13 StringTie transcript | 197005100 | 197006984 | . | - | . | transcript_MSTRG.11899. | lgene_id | MSTRG.11899; |
| 13 StringTie exon       | 197005100 | 197006159 | . | - | . | transcript_MSTRG.11899. | lgene_id | MSTRG.11899; |
| 13 StringTie exon       | 197006923 | 197006984 | . | - | . | transcript_MSTRG.11899. | lgene_id | MSTRG.11899; |
| 13 StringTie transcript | 200346877 | 200354811 | . | - | . | transcript_MSTRG.11948. | lgene_id | MSTRG.11948; |
| 13 StringTie exon       | 200346877 | 200347229 | . | - | . | transcript_MSTRG.11948. | lgene_id | MSTRG.11948; |
| 13 StringTie exon       | 200354756 | 200354811 | . | - | . | transcript_MSTRG.11948. | lgene_id | MSTRG.11948; |
| 13 StringTie transcript | 207030885 | 207042636 | . | - | . | transcript_MSTRG.12040. | lgene_id | MSTRG.12040; |



|                         |           |           |   |   |   |                                 |              |
|-------------------------|-----------|-----------|---|---|---|---------------------------------|--------------|
| 13 StringTie exon       | 207030885 | 207030952 | . | - | . | transcript_MSTRG.12040.lgene_id | MSTRG.12040; |
| 13 StringTie exon       | 207041894 | 207042089 | . | - | . | transcript_MSTRG.12040.lgene_id | MSTRG.12040; |
| 13 StringTie exon       | 207042493 | 207042636 | . | - | . | transcript_MSTRG.12040.lgene_id | MSTRG.12040; |
| 13 StringTie transcript | 207040528 | 207042078 | . | - | . | transcript_MSTRG.12040.lgene_id | MSTRG.12040; |
| 13 StringTie exon       | 207040528 | 207040616 | . | - | . | transcript_MSTRG.12040.lgene_id | MSTRG.12040; |
| 13 StringTie exon       | 207041894 | 207042078 | . | - | . | transcript_MSTRG.12040.lgene_id | MSTRG.12040; |
| 13 StringTie transcript | 207037987 | 207038672 | . | - | . | transcript_MSTRG.12042.lgene_id | MSTRG.12042; |
| 13 StringTie exon       | 207037987 | 207038579 | . | - | . | transcript_MSTRG.12042.lgene_id | MSTRG.12042; |
| 13 StringTie exon       | 207038600 | 207038672 | . | - | . | transcript_MSTRG.12042.lgene_id | MSTRG.12042; |
| 13 StringTie transcript | 207667580 | 207676635 | . | - | . | transcript_MSTRG.12063.lgene_id | MSTRG.12063; |
| 13 StringTie exon       | 207667580 | 207667608 | . | - | . | transcript_MSTRG.12063.lgene_id | MSTRG.12063; |
| 13 StringTie exon       | 207671910 | 207673014 | . | - | . | transcript_MSTRG.12063.lgene_id | MSTRG.12063; |
| 13 StringTie exon       | 207676555 | 207676635 | . | - | . | transcript_MSTRG.12063.lgene_id | MSTRG.12063; |
| 13 StringTie transcript | 207778450 | 207782592 | . | - | . | transcript_MSTRG.12071.lgene_id | MSTRG.12071; |
| 13 StringTie exon       | 207778450 | 207778727 | . | - | . | transcript_MSTRG.12071.lgene_id | MSTRG.12071; |
| 13 StringTie exon       | 207782023 | 207782592 | . | - | . | transcript_MSTRG.12071.lgene_id | MSTRG.12071; |
| 14 StringTie transcript | 1374532   | 1379753   | . | + | . | transcript_MSTRG.12095.lgene_id | MSTRG.12095; |
| 14 StringTie exon       | 1374532   | 1375043   | . | + | . | transcript_MSTRG.12095.lgene_id | MSTRG.12095; |
| 14 StringTie exon       | 1379644   | 1379753   | . | + | . | transcript_MSTRG.12095.lgene_id | MSTRG.12095; |
| 14 StringTie transcript | 2377076   | 2403858   | . | + | . | transcript_MSTRG.12110.lgene_id | MSTRG.12110; |
| 14 StringTie exon       | 2377076   | 2377104   | . | + | . | transcript_MSTRG.12110.lgene_id | MSTRG.12110; |
| 14 StringTie exon       | 2401350   | 2403858   | . | + | . | transcript_MSTRG.12110.lgene_id | MSTRG.12110; |
| 14 StringTie transcript | 7118642   | 7139902   | . | + | . | transcript_MSTRG.12183.lgene_id | MSTRG.12183; |
| 14 StringTie exon       | 7118642   | 7118657   | . | + | . | transcript_MSTRG.12183.lgene_id | MSTRG.12183; |
| 14 StringTie exon       | 7139257   | 7139902   | . | + | . | transcript_MSTRG.12183.lgene_id | MSTRG.12183; |
| 14 StringTie transcript | 7261641   | 7266771   | . | + | . | transcript_MSTRG.12191.lgene_id | MSTRG.12191; |
| 14 StringTie exon       | 7261641   | 7262434   | . | + | . | transcript_MSTRG.12191.lgene_id | MSTRG.12191; |
| 14 StringTie exon       | 7266382   | 7266771   | . | + | . | transcript_MSTRG.12191.lgene_id | MSTRG.12191; |
| 14 StringTie transcript | 11379377  | 11380480  | . | + | . | transcript_MSTRG.12265.lgene_id | MSTRG.12265; |
| 14 StringTie exon       | 11379377  | 11379670  | . | + | . | transcript_MSTRG.12265.lgene_id | MSTRG.12265; |
| 14 StringTie exon       | 11380357  | 11380480  | . | + | . | transcript_MSTRG.12265.lgene_id | MSTRG.12265; |
| 14 StringTie transcript | 15059860  | 15064032  | . | + | . | transcript_MSTRG.12355.lgene_id | MSTRG.12355; |
| 14 StringTie exon       | 15059860  | 15060032  | . | + | . | transcript_MSTRG.12355.lgene_id | MSTRG.12355; |
| 14 StringTie exon       | 15060750  | 15060816  | . | + | . | transcript_MSTRG.12355.lgene_id | MSTRG.12355; |
| 14 StringTie exon       | 15061510  | 15061768  | . | + | . | transcript_MSTRG.12355.lgene_id | MSTRG.12355; |

|                        |          |          |   |   |   |                                 |              |
|------------------------|----------|----------|---|---|---|---------------------------------|--------------|
| 14 StringTie exon      | 15062804 | 15064032 | . | + | . | transcript_MSTRG.12355.lgene_id | MSTRG.12355; |
| 14 StringTie transcrip | 16621007 | 16621894 | . | + | . | transcript_MSTRG.12369.lgene_id | MSTRG.12369; |
| 14 StringTie exon      | 16621007 | 16621124 | . | + | . | transcript_MSTRG.12369.lgene_id | MSTRG.12369; |
| 14 StringTie exon      | 16621790 | 16621894 | . | + | . | transcript_MSTRG.12369.lgene_id | MSTRG.12369; |
| 14 StringTie transcrip | 45250215 | 45334000 | . | + | . | transcript_MSTRG.12833.lgene_id | MSTRG.12833; |
| 14 StringTie exon      | 45250215 | 45250310 | . | + | . | transcript_MSTRG.12833.lgene_id | MSTRG.12833; |
| 14 StringTie exon      | 45318222 | 45318415 | . | + | . | transcript_MSTRG.12833.lgene_id | MSTRG.12833; |
| 14 StringTie exon      | 45333703 | 45334000 | . | + | . | transcript_MSTRG.12833.lgene_id | MSTRG.12833; |
| 14 StringTie transcrip | 48051410 | 48061578 | . | + | . | transcript_MSTRG.12898.lgene_id | MSTRG.12898; |
| 14 StringTie exon      | 48051410 | 48051658 | . | + | . | transcript_MSTRG.12898.lgene_id | MSTRG.12898; |
| 14 StringTie exon      | 48061024 | 48061578 | . | + | . | transcript_MSTRG.12898.lgene_id | MSTRG.12898; |
| 14 StringTie transcrip | 50370393 | 50372929 | . | + | . | transcript_MSTRG.12978.lgene_id | MSTRG.12978; |
| 14 StringTie exon      | 50370393 | 50371858 | . | + | . | transcript_MSTRG.12978.lgene_id | MSTRG.12978; |
| 14 StringTie exon      | 50372777 | 50372929 | . | + | . | transcript_MSTRG.12978.lgene_id | MSTRG.12978; |
| 14 StringTie transcrip | 50898782 | 50900457 | . | + | . | transcript_MSTRG.13043.lgene_id | MSTRG.13043; |
| 14 StringTie exon      | 50898782 | 50898892 | . | + | . | transcript_MSTRG.13043.lgene_id | MSTRG.13043; |
| 14 StringTie exon      | 50900350 | 50900457 | . | + | . | transcript_MSTRG.13043.lgene_id | MSTRG.13043; |
| 14 StringTie transcrip | 55368900 | 55428749 | . | + | . | transcript_MSTRG.13078.lgene_id | MSTRG.13078; |
| 14 StringTie exon      | 55368900 | 55369136 | . | + | . | transcript_MSTRG.13078.lgene_id | MSTRG.13078; |
| 14 StringTie exon      | 55390661 | 55390818 | . | + | . | transcript_MSTRG.13078.lgene_id | MSTRG.13078; |
| 14 StringTie exon      | 55427914 | 55428749 | . | + | . | transcript_MSTRG.13078.lgene_id | MSTRG.13078; |
| 14 StringTie transcrip | 55602782 | 55604369 | . | + | . | transcript_MSTRG.13093.lgene_id | MSTRG.13093; |
| 14 StringTie exon      | 55602782 | 55603457 | . | + | . | transcript_MSTRG.13093.lgene_id | MSTRG.13093; |
| 14 StringTie exon      | 55603740 | 55604369 | . | + | . | transcript_MSTRG.13093.lgene_id | MSTRG.13093; |
| 14 StringTie transcrip | 56128636 | 56129310 | . | + | . | transcript_MSTRG.13097.lgene_id | MSTRG.13097; |
| 14 StringTie exon      | 56128636 | 56128956 | . | + | . | transcript_MSTRG.13097.lgene_id | MSTRG.13097; |
| 14 StringTie exon      | 56129263 | 56129310 | . | + | . | transcript_MSTRG.13097.lgene_id | MSTRG.13097; |
| 14 StringTie transcrip | 56604933 | 56608193 | . | + | . | transcript_MSTRG.13114.lgene_id | MSTRG.13114; |
| 14 StringTie exon      | 56604933 | 56605142 | . | + | . | transcript_MSTRG.13114.lgene_id | MSTRG.13114; |
| 14 StringTie exon      | 56607677 | 56608193 | . | + | . | transcript_MSTRG.13114.lgene_id | MSTRG.13114; |
| 14 StringTie transcrip | 63492581 | 63493643 | . | + | . | transcript_MSTRG.13298.lgene_id | MSTRG.13298; |
| 14 StringTie exon      | 63492581 | 63493475 | . | + | . | transcript_MSTRG.13298.lgene_id | MSTRG.13298; |
| 14 StringTie exon      | 63493605 | 63493643 | . | + | . | transcript_MSTRG.13298.lgene_id | MSTRG.13298; |
| 14 StringTie transcrip | 71645354 | 71651747 | . | + | . | transcript_MSTRG.13339.lgene_id | MSTRG.13339; |
| 14 StringTie exon      | 71645354 | 71645515 | . | + | . | transcript_MSTRG.13339.lgene_id | MSTRG.13339; |

|                        |           |             |   |   |                                 |              |
|------------------------|-----------|-------------|---|---|---------------------------------|--------------|
| 14 StringTie exon      | 71651499  | 71651747 .  | + | . | transcript_MSTRG.13339.lgene_id | MSTRG.13339; |
| 14 StringTie transcrip | 76305059  | 76310589 .  | + | . | transcript_MSTRG.13469.lgene_id | MSTRG.13469; |
| 14 StringTie exon      | 76305059  | 76305143 .  | + | . | transcript_MSTRG.13469.lgene_id | MSTRG.13469; |
| 14 StringTie exon      | 76308020  | 76308187 .  | + | . | transcript_MSTRG.13469.lgene_id | MSTRG.13469; |
| 14 StringTie exon      | 76308500  | 76310589 .  | + | . | transcript_MSTRG.13469.lgene_id | MSTRG.13469; |
| 14 StringTie transcrip | 76444967  | 76445614 .  | + | . | transcript_MSTRG.13471.lgene_id | MSTRG.13471; |
| 14 StringTie exon      | 76444967  | 76445026 .  | + | . | transcript_MSTRG.13471.lgene_id | MSTRG.13471; |
| 14 StringTie exon      | 76445165  | 76445375 .  | + | . | transcript_MSTRG.13471.lgene_id | MSTRG.13471; |
| 14 StringTie exon      | 76445504  | 76445614 .  | + | . | transcript_MSTRG.13471.lgene_id | MSTRG.13471; |
| 14 StringTie transcrip | 80912236  | 81056170 .  | + | . | transcript_MSTRG.13605.lgene_id | MSTRG.13605; |
| 14 StringTie exon      | 80912236  | 80912275 .  | + | . | transcript_MSTRG.13605.lgene_id | MSTRG.13605; |
| 14 StringTie exon      | 81055909  | 81056170 .  | + | . | transcript_MSTRG.13605.lgene_id | MSTRG.13605; |
| 14 StringTie transcrip | 87900581  | 87900821 .  | + | . | transcript_MSTRG.13670.lgene_id | MSTRG.13670; |
| 14 StringTie exon      | 87900581  | 87900687 .  | + | . | transcript_MSTRG.13670.lgene_id | MSTRG.13670; |
| 14 StringTie exon      | 87900726  | 87900821 .  | + | . | transcript_MSTRG.13670.lgene_id | MSTRG.13670; |
| 14 StringTie transcrip | 91960423  | 92015488 .  | + | . | transcript_MSTRG.13754.lgene_id | MSTRG.13754; |
| 14 StringTie exon      | 91960423  | 91960538 .  | + | . | transcript_MSTRG.13754.lgene_id | MSTRG.13754; |
| 14 StringTie exon      | 92015318  | 92015488 .  | + | . | transcript_MSTRG.13754.lgene_id | MSTRG.13754; |
| 14 StringTie transcrip | 97609822  | 97629276 .  | + | . | transcript_MSTRG.13814.lgene_id | MSTRG.13814; |
| 14 StringTie exon      | 97609822  | 97609919 .  | + | . | transcript_MSTRG.13814.lgene_id | MSTRG.13814; |
| 14 StringTie exon      | 97629068  | 97629276 .  | + | . | transcript_MSTRG.13814.lgene_id | MSTRG.13814; |
| 14 StringTie transcrip | 99762683  | 99810990 .  | + | . | transcript_MSTRG.13827.lgene_id | MSTRG.13827; |
| 14 StringTie exon      | 99762683  | 99762698 .  | + | . | transcript_MSTRG.13827.lgene_id | MSTRG.13827; |
| 14 StringTie exon      | 99809558  | 99810990 .  | + | . | transcript_MSTRG.13827.lgene_id | MSTRG.13827; |
| 14 StringTie transcrip | 100689751 | 100692229 . | + | . | transcript_MSTRG.13832.lgene_id | MSTRG.13832; |
| 14 StringTie exon      | 100689751 | 100689773 . | + | . | transcript_MSTRG.13832.lgene_id | MSTRG.13832; |
| 14 StringTie exon      | 100691958 | 100692229 . | + | . | transcript_MSTRG.13832.lgene_id | MSTRG.13832; |
| 14 StringTie transcrip | 105039641 | 105043635 . | + | . | transcript_MSTRG.13959.lgene_id | MSTRG.13959; |
| 14 StringTie exon      | 105039641 | 105040021 . | + | . | transcript_MSTRG.13959.lgene_id | MSTRG.13959; |
| 14 StringTie exon      | 105043593 | 105043635 . | + | . | transcript_MSTRG.13959.lgene_id | MSTRG.13959; |
| 14 StringTie transcrip | 106993579 | 106997533 . | + | . | transcript_MSTRG.14011.lgene_id | MSTRG.14011; |
| 14 StringTie exon      | 106993579 | 106994181 . | + | . | transcript_MSTRG.14011.lgene_id | MSTRG.14011; |
| 14 StringTie exon      | 106995338 | 106997533 . | + | . | transcript_MSTRG.14011.lgene_id | MSTRG.14011; |
| 14 StringTie transcrip | 112734970 | 112747428 . | + | . | transcript_MSTRG.14135.lgene_id | MSTRG.14135; |
| 14 StringTie exon      | 112734970 | 112735077 . | + | . | transcript_MSTRG.14135.lgene_id | MSTRG.14135; |

|                        |           |           |   |   |   |                         |          |              |
|------------------------|-----------|-----------|---|---|---|-------------------------|----------|--------------|
| 14 StringTie exon      | 112746646 | 112747428 | . | + | . | transcript_MSTRG.14135. | lgene_id | MSTRG.14135; |
| 14 StringTie transcrip | 114064858 | 114065882 | . | + | . | transcript_MSTRG.14182. | lgene_id | MSTRG.14182; |
| 14 StringTie exon      | 114064858 | 114065031 | . | + | . | transcript_MSTRG.14182. | lgene_id | MSTRG.14182; |
| 14 StringTie exon      | 114065816 | 114065882 | . | + | . | transcript_MSTRG.14182. | lgene_id | MSTRG.14182; |
| 14 StringTie transcrip | 120326287 | 120327058 | . | + | . | transcript_MSTRG.14222. | lgene_id | MSTRG.14222; |
| 14 StringTie exon      | 120326287 | 120326419 | . | + | . | transcript_MSTRG.14222. | lgene_id | MSTRG.14222; |
| 14 StringTie exon      | 120326725 | 120327058 | . | + | . | transcript_MSTRG.14222. | lgene_id | MSTRG.14222; |
| 14 StringTie transcrip | 122584350 | 122607227 | . | + | . | transcript_MSTRG.14237. | lgene_id | MSTRG.14237; |
| 14 StringTie exon      | 122584350 | 122584680 | . | + | . | transcript_MSTRG.14237. | lgene_id | MSTRG.14237; |
| 14 StringTie exon      | 122606918 | 122607227 | . | + | . | transcript_MSTRG.14237. | lgene_id | MSTRG.14237; |
| 14 StringTie transcrip | 123947234 | 123949582 | . | + | . | transcript_MSTRG.14296. | lgene_id | MSTRG.14296; |
| 14 StringTie exon      | 123947234 | 123947339 | . | + | . | transcript_MSTRG.14296. | lgene_id | MSTRG.14296; |
| 14 StringTie exon      | 123947505 | 123949582 | . | + | . | transcript_MSTRG.14296. | lgene_id | MSTRG.14296; |
| 14 StringTie transcrip | 124134276 | 124135713 | . | + | . | transcript_MSTRG.14286. | lgene_id | MSTRG.14286; |
| 14 StringTie exon      | 124134276 | 124134444 | . | + | . | transcript_MSTRG.14286. | lgene_id | MSTRG.14286; |
| 14 StringTie exon      | 124135683 | 124135713 | . | + | . | transcript_MSTRG.14286. | lgene_id | MSTRG.14286; |
| 14 StringTie transcrip | 124134317 | 124148926 | . | + | . | transcript_MSTRG.14286. | lgene_id | MSTRG.14286; |
| 14 StringTie exon      | 124134317 | 124134444 | . | + | . | transcript_MSTRG.14286. | lgene_id | MSTRG.14286; |
| 14 StringTie exon      | 124148821 | 124148926 | . | + | . | transcript_MSTRG.14286. | lgene_id | MSTRG.14286; |
| 14 StringTie transcrip | 124521419 | 124522678 | . | + | . | transcript_MSTRG.14293. | lgene_id | MSTRG.14293; |
| 14 StringTie exon      | 124521419 | 124521609 | . | + | . | transcript_MSTRG.14293. | lgene_id | MSTRG.14293; |
| 14 StringTie exon      | 124522515 | 124522678 | . | + | . | transcript_MSTRG.14293. | lgene_id | MSTRG.14293; |
| 14 StringTie transcrip | 125069275 | 125073822 | . | + | . | transcript_MSTRG.14330. | lgene_id | MSTRG.14330; |
| 14 StringTie exon      | 125069275 | 125069308 | . | + | . | transcript_MSTRG.14330. | lgene_id | MSTRG.14330; |
| 14 StringTie exon      | 125072896 | 125073822 | . | + | . | transcript_MSTRG.14330. | lgene_id | MSTRG.14330; |
| 14 StringTie transcrip | 125107441 | 125122382 | . | + | . | transcript_MSTRG.14331. | lgene_id | MSTRG.14331; |
| 14 StringTie exon      | 125107441 | 125108221 | . | + | . | transcript_MSTRG.14331. | lgene_id | MSTRG.14331; |
| 14 StringTie exon      | 125120090 | 125120177 | . | + | . | transcript_MSTRG.14331. | lgene_id | MSTRG.14331; |
| 14 StringTie exon      | 125122135 | 125122382 | . | + | . | transcript_MSTRG.14331. | lgene_id | MSTRG.14331; |
| 14 StringTie transcrip | 125120971 | 125122381 | . | + | . | transcript_MSTRG.14331. | lgene_id | MSTRG.14331; |
| 14 StringTie exon      | 125120971 | 125121326 | . | + | . | transcript_MSTRG.14331. | lgene_id | MSTRG.14331; |
| 14 StringTie exon      | 125122135 | 125122381 | . | + | . | transcript_MSTRG.14331. | lgene_id | MSTRG.14331; |
| 14 StringTie transcrip | 130675216 | 130675834 | . | + | . | transcript_MSTRG.14392. | lgene_id | MSTRG.14392; |
| 14 StringTie exon      | 130675216 | 130675477 | . | + | . | transcript_MSTRG.14392. | lgene_id | MSTRG.14392; |
| 14 StringTie exon      | 130675797 | 130675834 | . | + | . | transcript_MSTRG.14392. | lgene_id | MSTRG.14392; |

|                         |           |           |   |   |   |                                 |              |
|-------------------------|-----------|-----------|---|---|---|---------------------------------|--------------|
| 14 StringTie transcript | 131586326 | 131601512 | . | + | . | transcript_MSTRG.14397.lgene_id | MSTRG.14397; |
| 14 StringTie exon       | 131586326 | 131586402 | . | + | . | transcript_MSTRG.14397.lgene_id | MSTRG.14397; |
| 14 StringTie exon       | 131593384 | 131593624 | . | + | . | transcript_MSTRG.14397.lgene_id | MSTRG.14397; |
| 14 StringTie exon       | 131601449 | 131601512 | . | + | . | transcript_MSTRG.14397.lgene_id | MSTRG.14397; |
| 14 StringTie transcript | 131593329 | 131593880 | . | + | . | transcript_MSTRG.14397.lgene_id | MSTRG.14397; |
| 14 StringTie exon       | 131593329 | 131593624 | . | + | . | transcript_MSTRG.14397.lgene_id | MSTRG.14397; |
| 14 StringTie exon       | 131593803 | 131593880 | . | + | . | transcript_MSTRG.14397.lgene_id | MSTRG.14397; |
| 14 StringTie transcript | 138846008 | 138849346 | . | + | . | transcript_MSTRG.14470.lgene_id | MSTRG.14470; |
| 14 StringTie exon       | 138846008 | 138846087 | . | + | . | transcript_MSTRG.14470.lgene_id | MSTRG.14470; |
| 14 StringTie exon       | 138846697 | 138846809 | . | + | . | transcript_MSTRG.14470.lgene_id | MSTRG.14470; |
| 14 StringTie exon       | 138849286 | 138849346 | . | + | . | transcript_MSTRG.14470.lgene_id | MSTRG.14470; |
| 14 StringTie transcript | 140372113 | 140373753 | . | + | . | transcript_MSTRG.14472.lgene_id | MSTRG.14472; |
| 14 StringTie exon       | 140372113 | 140372157 | . | + | . | transcript_MSTRG.14472.lgene_id | MSTRG.14472; |
| 14 StringTie exon       | 140373076 | 140373753 | . | + | . | transcript_MSTRG.14472.lgene_id | MSTRG.14472; |
| 14 StringTie transcript | 141290979 | 141292222 | . | + | . | transcript_MSTRG.14496.lgene_id | MSTRG.14496; |
| 14 StringTie exon       | 141290979 | 141291387 | . | + | . | transcript_MSTRG.14496.lgene_id | MSTRG.14496; |
| 14 StringTie exon       | 141292012 | 141292222 | . | + | . | transcript_MSTRG.14496.lgene_id | MSTRG.14496; |
| 14 StringTie transcript | 925351    | 926987    | . | - | . | transcript_MSTRG.12093.lgene_id | MSTRG.12093; |
| 14 StringTie exon       | 925351    | 925406    | . | - | . | transcript_MSTRG.12093.lgene_id | MSTRG.12093; |
| 14 StringTie exon       | 926803    | 926987    | . | - | . | transcript_MSTRG.12093.lgene_id | MSTRG.12093; |
| 14 StringTie transcript | 3917679   | 3928965   | . | - | . | transcript_MSTRG.12125.lgene_id | MSTRG.12125; |
| 14 StringTie exon       | 3917679   | 3917715   | . | - | . | transcript_MSTRG.12125.lgene_id | MSTRG.12125; |
| 14 StringTie exon       | 3919614   | 3919973   | . | - | . | transcript_MSTRG.12125.lgene_id | MSTRG.12125; |
| 14 StringTie exon       | 3928879   | 3928965   | . | - | . | transcript_MSTRG.12125.lgene_id | MSTRG.12125; |
| 14 StringTie transcript | 4126158   | 4127970   | . | - | . | transcript_MSTRG.12130.lgene_id | MSTRG.12130; |
| 14 StringTie exon       | 4126158   | 4126268   | . | - | . | transcript_MSTRG.12130.lgene_id | MSTRG.12130; |
| 14 StringTie exon       | 4127860   | 4127970   | . | - | . | transcript_MSTRG.12130.lgene_id | MSTRG.12130; |
| 14 StringTie transcript | 6845435   | 6849745   | . | - | . | transcript_MSTRG.12163.lgene_id | MSTRG.12163; |
| 14 StringTie exon       | 6845435   | 6845733   | . | - | . | transcript_MSTRG.12163.lgene_id | MSTRG.12163; |
| 14 StringTie exon       | 6849165   | 6849745   | . | - | . | transcript_MSTRG.12163.lgene_id | MSTRG.12163; |
| 14 StringTie transcript | 6849216   | 6849707   | . | - | . | transcript_MSTRG.12163.lgene_id | MSTRG.12163; |
| 14 StringTie exon       | 6849216   | 6849258   | . | - | . | transcript_MSTRG.12163.lgene_id | MSTRG.12163; |
| 14 StringTie exon       | 6849546   | 6849707   | . | - | . | transcript_MSTRG.12163.lgene_id | MSTRG.12163; |
| 14 StringTie transcript | 7365667   | 7371370   | . | - | . | transcript_MSTRG.12194.lgene_id | MSTRG.12194; |
| 14 StringTie exon       | 7365667   | 7366524   | . | - | . | transcript_MSTRG.12194.lgene_id | MSTRG.12194; |

|                        |          |          |   |   |   |                                 |              |
|------------------------|----------|----------|---|---|---|---------------------------------|--------------|
| 14 StringTie exon      | 7370890  | 7371370  | . | - | . | transcript_MSTRG.12194.¿gene_id | MSTRG.12194; |
| 14 StringTie transcrip | 30319534 | 30320705 | . | - | . | transcript_MSTRG.12532.lgene_id | MSTRG.12532; |
| 14 StringTie exon      | 30319534 | 30320466 | . | - | . | transcript_MSTRG.12532.lgene_id | MSTRG.12532; |
| 14 StringTie exon      | 30320597 | 30320705 | . | - | . | transcript_MSTRG.12532.lgene_id | MSTRG.12532; |
| 14 StringTie transcrip | 30998214 | 31010872 | . | - | . | transcript_MSTRG.12543.lgene_id | MSTRG.12543; |
| 14 StringTie exon      | 30998214 | 30998470 | . | - | . | transcript_MSTRG.12543.lgene_id | MSTRG.12543; |
| 14 StringTie exon      | 31009316 | 31010872 | . | - | . | transcript_MSTRG.12543.lgene_id | MSTRG.12543; |
| 14 StringTie transcrip | 33901526 | 33915252 | . | - | . | transcript_MSTRG.12626.lgene_id | MSTRG.12626; |
| 14 StringTie exon      | 33901526 | 33901817 | . | - | . | transcript_MSTRG.12626.lgene_id | MSTRG.12626; |
| 14 StringTie exon      | 33915230 | 33915252 | . | - | . | transcript_MSTRG.12626.lgene_id | MSTRG.12626; |
| 14 StringTie transcrip | 37767796 | 37771105 | . | - | . | transcript_MSTRG.12688.lgene_id | MSTRG.12688; |
| 14 StringTie exon      | 37767796 | 37768095 | . | - | . | transcript_MSTRG.12688.lgene_id | MSTRG.12688; |
| 14 StringTie exon      | 37771052 | 37771105 | . | - | . | transcript_MSTRG.12688.lgene_id | MSTRG.12688; |
| 14 StringTie transcrip | 40927236 | 40943719 | . | - | . | transcript_MSTRG.12769.lgene_id | MSTRG.12769; |
| 14 StringTie exon      | 40927236 | 40928010 | . | - | . | transcript_MSTRG.12769.lgene_id | MSTRG.12769; |
| 14 StringTie exon      | 40928864 | 40928935 | . | - | . | transcript_MSTRG.12769.lgene_id | MSTRG.12769; |
| 14 StringTie exon      | 40931040 | 40931064 | . | - | . | transcript_MSTRG.12769.lgene_id | MSTRG.12769; |
| 14 StringTie exon      | 40932319 | 40932389 | . | - | . | transcript_MSTRG.12769.lgene_id | MSTRG.12769; |
| 14 StringTie exon      | 40933436 | 40933613 | . | - | . | transcript_MSTRG.12769.lgene_id | MSTRG.12769; |
| 14 StringTie exon      | 40943692 | 40943719 | . | - | . | transcript_MSTRG.12769.lgene_id | MSTRG.12769; |
| 14 StringTie transcrip | 49001079 | 49004417 | . | - | . | transcript_MSTRG.12945.¿gene_id | MSTRG.12945; |
| 14 StringTie exon      | 49001079 | 49001189 | . | - | . | transcript_MSTRG.12945.¿gene_id | MSTRG.12945; |
| 14 StringTie exon      | 49004308 | 49004417 | . | - | . | transcript_MSTRG.12945.¿gene_id | MSTRG.12945; |
| 14 StringTie transcrip | 49001079 | 49007534 | . | - | . | transcript_MSTRG.12945.lgene_id | MSTRG.12945; |
| 14 StringTie exon      | 49001079 | 49001189 | . | - | . | transcript_MSTRG.12945.lgene_id | MSTRG.12945; |
| 14 StringTie exon      | 49007424 | 49007534 | . | - | . | transcript_MSTRG.12945.lgene_id | MSTRG.12945; |
| 14 StringTie transcrip | 50690427 | 50691003 | . | - | . | transcript_MSTRG.13002.lgene_id | MSTRG.13002; |
| 14 StringTie exon      | 50690427 | 50690479 | . | - | . | transcript_MSTRG.13002.lgene_id | MSTRG.13002; |
| 14 StringTie exon      | 50690594 | 50690763 | . | - | . | transcript_MSTRG.13002.lgene_id | MSTRG.13002; |
| 14 StringTie exon      | 50690894 | 50691003 | . | - | . | transcript_MSTRG.13002.lgene_id | MSTRG.13002; |
| 14 StringTie transcrip | 50762070 | 50773772 | . | - | . | transcript_MSTRG.13038.lgene_id | MSTRG.13038; |
| 14 StringTie exon      | 50762070 | 50763634 | . | - | . | transcript_MSTRG.13038.lgene_id | MSTRG.13038; |
| 14 StringTie exon      | 50773060 | 50773130 | . | - | . | transcript_MSTRG.13038.lgene_id | MSTRG.13038; |
| 14 StringTie exon      | 50773404 | 50773772 | . | - | . | transcript_MSTRG.13038.lgene_id | MSTRG.13038; |
| 14 StringTie transcrip | 50998255 | 51002950 | . | - | . | transcript_MSTRG.13048.¿gene_id | MSTRG.13048; |

|                        |          |          |   |   |   |                                 |              |
|------------------------|----------|----------|---|---|---|---------------------------------|--------------|
| 14 StringTie exon      | 50998255 | 50998685 | . | - | . | transcript_MSTRG.13048.(gene_id | MSTRG.13048; |
| 14 StringTie exon      | 50999626 | 50999848 | . | - | . | transcript_MSTRG.13048.(gene_id | MSTRG.13048; |
| 14 StringTie exon      | 51002775 | 51002950 | . | - | . | transcript_MSTRG.13048.(gene_id | MSTRG.13048; |
| 14 StringTie transcrip | 51349877 | 51352953 | . | - | . | transcript_MSTRG.13007.]gene_id | MSTRG.13007; |
| 14 StringTie exon      | 51349877 | 51350992 | . | - | . | transcript_MSTRG.13007.]gene_id | MSTRG.13007; |
| 14 StringTie exon      | 51352506 | 51352953 | . | - | . | transcript_MSTRG.13007.]gene_id | MSTRG.13007; |
| 14 StringTie transcrip | 60415332 | 60415679 | . | - | . | transcript_MSTRG.13186.↑gene_id | MSTRG.13186; |
| 14 StringTie exon      | 60415332 | 60415448 | . | - | . | transcript_MSTRG.13186.↑gene_id | MSTRG.13186; |
| 14 StringTie exon      | 60415492 | 60415679 | . | - | . | transcript_MSTRG.13186.↑gene_id | MSTRG.13186; |
| 14 StringTie transcrip | 60415332 | 60415679 | . | - | . | transcript_MSTRG.13186.(gene_id | MSTRG.13186; |
| 14 StringTie exon      | 60415332 | 60415472 | . | - | . | transcript_MSTRG.13186.(gene_id | MSTRG.13186; |
| 14 StringTie exon      | 60415590 | 60415679 | . | - | . | transcript_MSTRG.13186.(gene_id | MSTRG.13186; |
| 14 StringTie transcrip | 60911043 | 60938894 | . | - | . | transcript_MSTRG.13205.¿gene_id | MSTRG.13205; |
| 14 StringTie exon      | 60911043 | 60912810 | . | - | . | transcript_MSTRG.13205.¿gene_id | MSTRG.13205; |
| 14 StringTie exon      | 60924849 | 60924944 | . | - | . | transcript_MSTRG.13205.¿gene_id | MSTRG.13205; |
| 14 StringTie exon      | 60938383 | 60938894 | . | - | . | transcript_MSTRG.13205.¿gene_id | MSTRG.13205; |
| 14 StringTie transcrip | 60936516 | 60938866 | . | - | . | transcript_MSTRG.13205.¿gene_id | MSTRG.13205; |
| 14 StringTie exon      | 60936516 | 60936731 | . | - | . | transcript_MSTRG.13205.¿gene_id | MSTRG.13205; |
| 14 StringTie exon      | 60938383 | 60938866 | . | - | . | transcript_MSTRG.13205.¿gene_id | MSTRG.13205; |
| 14 StringTie transcrip | 61684405 | 61688596 | . | - | . | transcript_MSTRG.13220.]gene_id | MSTRG.13220; |
| 14 StringTie exon      | 61684405 | 61685572 | . | - | . | transcript_MSTRG.13220.]gene_id | MSTRG.13220; |
| 14 StringTie exon      | 61687782 | 61687993 | . | - | . | transcript_MSTRG.13220.]gene_id | MSTRG.13220; |
| 14 StringTie exon      | 61688116 | 61688596 | . | - | . | transcript_MSTRG.13220.]gene_id | MSTRG.13220; |
| 14 StringTie transcrip | 61686164 | 61688565 | . | - | . | transcript_MSTRG.13220.¿gene_id | MSTRG.13220; |
| 14 StringTie exon      | 61686164 | 61687993 | . | - | . | transcript_MSTRG.13220.¿gene_id | MSTRG.13220; |
| 14 StringTie exon      | 61688317 | 61688565 | . | - | . | transcript_MSTRG.13220.¿gene_id | MSTRG.13220; |
| 14 StringTie transcrip | 77911698 | 77923219 | . | - | . | transcript_MSTRG.13498.]gene_id | MSTRG.13498; |
| 14 StringTie exon      | 77911698 | 77919290 | . | - | . | transcript_MSTRG.13498.]gene_id | MSTRG.13498; |
| 14 StringTie exon      | 77922634 | 77923219 | . | - | . | transcript_MSTRG.13498.]gene_id | MSTRG.13498; |
| 14 StringTie transcrip | 77935645 | 77936256 | . | - | . | transcript_MSTRG.13502.]gene_id | MSTRG.13502; |
| 14 StringTie exon      | 77935645 | 77935714 | . | - | . | transcript_MSTRG.13502.]gene_id | MSTRG.13502; |
| 14 StringTie exon      | 77936041 | 77936256 | . | - | . | transcript_MSTRG.13502.]gene_id | MSTRG.13502; |
| 14 StringTie transcrip | 78543900 | 78564568 | . | - | . | transcript_MSTRG.13552.]gene_id | MSTRG.13552; |
| 14 StringTie exon      | 78543900 | 78544004 | . | - | . | transcript_MSTRG.13552.]gene_id | MSTRG.13552; |
| 14 StringTie exon      | 78564472 | 78564568 | . | - | . | transcript_MSTRG.13552.]gene_id | MSTRG.13552; |

|                         |           |           |   |   |   |                         |          |              |
|-------------------------|-----------|-----------|---|---|---|-------------------------|----------|--------------|
| 14 StringTie transcript | 88431289  | 88432647  | . | - | . | transcript_MSTRG.13683. | lgene_id | MSTRG.13683; |
| 14 StringTie exon       | 88431289  | 88431533  | . | - | . | transcript_MSTRG.13683. | lgene_id | MSTRG.13683; |
| 14 StringTie exon       | 88432470  | 88432647  | . | - | . | transcript_MSTRG.13683. | lgene_id | MSTRG.13683; |
| 14 StringTie transcript | 89881704  | 89885731  | . | - | . | transcript_MSTRG.13701. | lgene_id | MSTRG.13701; |
| 14 StringTie exon       | 89881704  | 89881862  | . | - | . | transcript_MSTRG.13701. | lgene_id | MSTRG.13701; |
| 14 StringTie exon       | 89885575  | 89885731  | . | - | . | transcript_MSTRG.13701. | lgene_id | MSTRG.13701; |
| 14 StringTie transcript | 99298317  | 99454743  | . | - | . | transcript_MSTRG.13811. | {gene_id | MSTRG.13811; |
| 14 StringTie exon       | 99298317  | 99298358  | . | - | . | transcript_MSTRG.13811. | {gene_id | MSTRG.13811; |
| 14 StringTie exon       | 99349892  | 99349974  | . | - | . | transcript_MSTRG.13811. | {gene_id | MSTRG.13811; |
| 14 StringTie exon       | 99454410  | 99454743  | . | - | . | transcript_MSTRG.13811. | {gene_id | MSTRG.13811; |
| 14 StringTie transcript | 106696815 | 106700176 | . | - | . | transcript_MSTRG.13970. | {gene_id | MSTRG.13970; |
| 14 StringTie exon       | 106696815 | 106697172 | . | - | . | transcript_MSTRG.13970. | {gene_id | MSTRG.13970; |
| 14 StringTie exon       | 106698840 | 106698918 | . | - | . | transcript_MSTRG.13970. | {gene_id | MSTRG.13970; |
| 14 StringTie exon       | 106699909 | 106700176 | . | - | . | transcript_MSTRG.13970. | {gene_id | MSTRG.13970; |
| 14 StringTie transcript | 107306378 | 107396150 | . | - | . | transcript_MSTRG.13999. | lgene_id | MSTRG.13999; |
| 14 StringTie exon       | 107306378 | 107306406 | . | - | . | transcript_MSTRG.13999. | lgene_id | MSTRG.13999; |
| 14 StringTie exon       | 107389015 | 107396150 | . | - | . | transcript_MSTRG.13999. | lgene_id | MSTRG.13999; |
| 14 StringTie transcript | 109065003 | 109119816 | . | - | . | transcript_MSTRG.14048. | lgene_id | MSTRG.14048; |
| 14 StringTie exon       | 109065003 | 109065097 | . | - | . | transcript_MSTRG.14048. | lgene_id | MSTRG.14048; |
| 14 StringTie exon       | 109119113 | 109119816 | . | - | . | transcript_MSTRG.14048. | lgene_id | MSTRG.14048; |
| 14 StringTie transcript | 109065061 | 109119773 | . | - | . | transcript_MSTRG.14048. | {gene_id | MSTRG.14048; |
| 14 StringTie exon       | 109065061 | 109065097 | . | - | . | transcript_MSTRG.14048. | {gene_id | MSTRG.14048; |
| 14 StringTie exon       | 109117103 | 109119773 | . | - | . | transcript_MSTRG.14048. | {gene_id | MSTRG.14048; |
| 14 StringTie transcript | 109092090 | 109119764 | . | - | . | transcript_MSTRG.14048. | {gene_id | MSTRG.14048; |
| 14 StringTie exon       | 109092090 | 109092374 | . | - | . | transcript_MSTRG.14048. | {gene_id | MSTRG.14048; |
| 14 StringTie exon       | 109119113 | 109119764 | . | - | . | transcript_MSTRG.14048. | {gene_id | MSTRG.14048; |
| 14 StringTie transcript | 109092348 | 109119773 | . | - | . | transcript_MSTRG.14048. | {gene_id | MSTRG.14048; |
| 14 StringTie exon       | 109092348 | 109092374 | . | - | . | transcript_MSTRG.14048. | {gene_id | MSTRG.14048; |
| 14 StringTie exon       | 109117103 | 109119773 | . | - | . | transcript_MSTRG.14048. | {gene_id | MSTRG.14048; |
| 14 StringTie transcript | 111470803 | 111477982 | . | - | . | transcript_MSTRG.14097. | lgene_id | MSTRG.14097; |
| 14 StringTie exon       | 111470803 | 111470938 | . | - | . | transcript_MSTRG.14097. | lgene_id | MSTRG.14097; |
| 14 StringTie exon       | 111477872 | 111477982 | . | - | . | transcript_MSTRG.14097. | lgene_id | MSTRG.14097; |
| 14 StringTie transcript | 112120679 | 112122120 | . | - | . | transcript_MSTRG.14115. | lgene_id | MSTRG.14115; |
| 14 StringTie exon       | 112120679 | 112120882 | . | - | . | transcript_MSTRG.14115. | lgene_id | MSTRG.14115; |
| 14 StringTie exon       | 112122014 | 112122120 | . | - | . | transcript_MSTRG.14115. | lgene_id | MSTRG.14115; |



|                        |           |           |   |   |   |                         |          |              |
|------------------------|-----------|-----------|---|---|---|-------------------------|----------|--------------|
| 14 StringTie transcrip | 121135903 | 121140617 | . | - | . | transcript_MSTRG.14258. | lgene_id | MSTRG.14258; |
| 14 StringTie exon      | 121135903 | 121139012 | . | - | . | transcript_MSTRG.14258. | lgene_id | MSTRG.14258; |
| 14 StringTie exon      | 121139882 | 121140617 | . | - | . | transcript_MSTRG.14258. | lgene_id | MSTRG.14258; |
| 14 StringTie transcrip | 121137764 | 121140693 | . | - | . | transcript_MSTRG.14258. | lgene_id | MSTRG.14258; |
| 14 StringTie exon      | 121137764 | 121139012 | . | - | . | transcript_MSTRG.14258. | lgene_id | MSTRG.14258; |
| 14 StringTie exon      | 121140021 | 121140693 | . | - | . | transcript_MSTRG.14258. | lgene_id | MSTRG.14258; |
| 14 StringTie transcrip | 121269520 | 121285144 | . | - | . | transcript_MSTRG.14266. | lgene_id | MSTRG.14266; |
| 14 StringTie exon      | 121269520 | 121269646 | . | - | . | transcript_MSTRG.14266. | lgene_id | MSTRG.14266; |
| 14 StringTie exon      | 121271651 | 121271778 | . | - | . | transcript_MSTRG.14266. | lgene_id | MSTRG.14266; |
| 14 StringTie exon      | 121284970 | 121285144 | . | - | . | transcript_MSTRG.14266. | lgene_id | MSTRG.14266; |
| 14 StringTie transcrip | 123424878 | 123426792 | . | - | . | transcript_MSTRG.14281. | lgene_id | MSTRG.14281; |
| 14 StringTie exon      | 123424878 | 123425574 | . | - | . | transcript_MSTRG.14281. | lgene_id | MSTRG.14281; |
| 14 StringTie exon      | 123426707 | 123426792 | . | - | . | transcript_MSTRG.14281. | lgene_id | MSTRG.14281; |
| 14 StringTie transcrip | 124744074 | 124757578 | . | - | . | transcript_MSTRG.14298. | lgene_id | MSTRG.14298; |
| 14 StringTie exon      | 124744074 | 124744374 | . | - | . | transcript_MSTRG.14298. | lgene_id | MSTRG.14298; |
| 14 StringTie exon      | 124757437 | 124757578 | . | - | . | transcript_MSTRG.14298. | lgene_id | MSTRG.14298; |
| 14 StringTie transcrip | 125122106 | 125124015 | . | - | . | transcript_MSTRG.14332. | lgene_id | MSTRG.14332; |
| 14 StringTie exon      | 125122106 | 125122353 | . | - | . | transcript_MSTRG.14332. | lgene_id | MSTRG.14332; |
| 14 StringTie exon      | 125123880 | 125124015 | . | - | . | transcript_MSTRG.14332. | lgene_id | MSTRG.14332; |
| 14 StringTie transcrip | 134142790 | 134144193 | . | - | . | transcript_MSTRG.14426. | lgene_id | MSTRG.14426; |
| 14 StringTie exon      | 134142790 | 134143100 | . | - | . | transcript_MSTRG.14426. | lgene_id | MSTRG.14426; |
| 14 StringTie exon      | 134144173 | 134144193 | . | - | . | transcript_MSTRG.14426. | lgene_id | MSTRG.14426; |
| 14 StringTie transcrip | 135085392 | 135086094 | . | - | . | transcript_MSTRG.14437. | lgene_id | MSTRG.14437; |
| 14 StringTie exon      | 135085392 | 135085497 | . | - | . | transcript_MSTRG.14437. | lgene_id | MSTRG.14437; |
| 14 StringTie exon      | 135085985 | 135086094 | . | - | . | transcript_MSTRG.14437. | lgene_id | MSTRG.14437; |
| 14 StringTie transcrip | 138495317 | 138501675 | . | - | . | transcript_MSTRG.14459. | lgene_id | MSTRG.14459; |
| 14 StringTie exon      | 138495317 | 138501675 | . | - | . | transcript_MSTRG.14459. | lgene_id | MSTRG.14459; |
| 14 StringTie transcrip | 138500026 | 138501738 | . | - | . | transcript_MSTRG.14459. | lgene_id | MSTRG.14459; |
| 14 StringTie exon      | 138500026 | 138501246 | . | - | . | transcript_MSTRG.14459. | lgene_id | MSTRG.14459; |
| 14 StringTie exon      | 138501378 | 138501738 | . | - | . | transcript_MSTRG.14459. | lgene_id | MSTRG.14459; |
| 14 StringTie transcrip | 140633130 | 140637849 | . | - | . | transcript_MSTRG.14480. | lgene_id | MSTRG.14480; |
| 14 StringTie exon      | 140633130 | 140633156 | . | - | . | transcript_MSTRG.14480. | lgene_id | MSTRG.14480; |
| 14 StringTie exon      | 140637474 | 140637849 | . | - | . | transcript_MSTRG.14480. | lgene_id | MSTRG.14480; |
| 15 StringTie transcrip | 6600701   | 6607813   | . | + | . | transcript_MSTRG.14564. | lgene_id | MSTRG.14564; |
| 15 StringTie exon      | 6600701   | 6600827   | . | + | . | transcript_MSTRG.14564. | lgene_id | MSTRG.14564; |

|                        |         |         |   |   |   |                                 |              |
|------------------------|---------|---------|---|---|---|---------------------------------|--------------|
| 15 StringTie exon      | 6607096 | 6607813 | . | + | . | transcript_MSTRG.14564.lgene_id | MSTRG.14564; |
| 15 StringTie transcrip | 6685434 | 6840986 | . | + | . | transcript_MSTRG.14573.lgene_id | MSTRG.14573; |
| 15 StringTie exon      | 6685434 | 6685471 | . | + | . | transcript_MSTRG.14573.lgene_id | MSTRG.14573; |
| 15 StringTie exon      | 6711192 | 6711226 | . | + | . | transcript_MSTRG.14573.lgene_id | MSTRG.14573; |
| 15 StringTie exon      | 6711253 | 6711395 | . | + | . | transcript_MSTRG.14573.lgene_id | MSTRG.14573; |
| 15 StringTie exon      | 6838496 | 6840986 | . | + | . | transcript_MSTRG.14573.lgene_id | MSTRG.14573; |
| 15 StringTie transcrip | 6706210 | 6840865 | . | + | . | transcript_MSTRG.14573.lgene_id | MSTRG.14573; |
| 15 StringTie exon      | 6706210 | 6706326 | . | + | . | transcript_MSTRG.14573.lgene_id | MSTRG.14573; |
| 15 StringTie exon      | 6711192 | 6711226 | . | + | . | transcript_MSTRG.14573.lgene_id | MSTRG.14573; |
| 15 StringTie exon      | 6711253 | 6711395 | . | + | . | transcript_MSTRG.14573.lgene_id | MSTRG.14573; |
| 15 StringTie exon      | 6838496 | 6840865 | . | + | . | transcript_MSTRG.14573.lgene_id | MSTRG.14573; |
| 15 StringTie transcrip | 6706210 | 6840865 | . | + | . | transcript_MSTRG.14573.lgene_id | MSTRG.14573; |
| 15 StringTie exon      | 6706210 | 6706326 | . | + | . | transcript_MSTRG.14573.lgene_id | MSTRG.14573; |
| 15 StringTie exon      | 6838496 | 6840865 | . | + | . | transcript_MSTRG.14573.lgene_id | MSTRG.14573; |
| 15 StringTie transcrip | 6706235 | 6840986 | . | + | . | transcript_MSTRG.14573.lgene_id | MSTRG.14573; |
| 15 StringTie exon      | 6706235 | 6706326 | . | + | . | transcript_MSTRG.14573.lgene_id | MSTRG.14573; |
| 15 StringTie exon      | 6711192 | 6711395 | . | + | . | transcript_MSTRG.14573.lgene_id | MSTRG.14573; |
| 15 StringTie exon      | 6838496 | 6840986 | . | + | . | transcript_MSTRG.14573.lgene_id | MSTRG.14573; |
| 15 StringTie transcrip | 6711189 | 6897580 | . | + | . | transcript_MSTRG.14573.lgene_id | MSTRG.14573; |
| 15 StringTie exon      | 6711189 | 6711395 | . | + | . | transcript_MSTRG.14573.lgene_id | MSTRG.14573; |
| 15 StringTie exon      | 6897502 | 6897580 | . | + | . | transcript_MSTRG.14573.lgene_id | MSTRG.14573; |
| 15 StringTie transcrip | 6996289 | 7035999 | . | + | . | transcript_MSTRG.14578.lgene_id | MSTRG.14578; |
| 15 StringTie exon      | 6996289 | 6996472 | . | + | . | transcript_MSTRG.14578.lgene_id | MSTRG.14578; |
| 15 StringTie exon      | 6996618 | 6996683 | . | + | . | transcript_MSTRG.14578.lgene_id | MSTRG.14578; |
| 15 StringTie exon      | 7034427 | 7035999 | . | + | . | transcript_MSTRG.14578.lgene_id | MSTRG.14578; |
| 15 StringTie transcrip | 6996319 | 7019003 | . | + | . | transcript_MSTRG.14578.lgene_id | MSTRG.14578; |
| 15 StringTie exon      | 6996319 | 6996472 | . | + | . | transcript_MSTRG.14578.lgene_id | MSTRG.14578; |
| 15 StringTie exon      | 6996618 | 6996683 | . | + | . | transcript_MSTRG.14578.lgene_id | MSTRG.14578; |
| 15 StringTie exon      | 7018572 | 7019003 | . | + | . | transcript_MSTRG.14578.lgene_id | MSTRG.14578; |
| 15 StringTie transcrip | 7685379 | 7699992 | . | + | . | transcript_MSTRG.14604.lgene_id | MSTRG.14604; |
| 15 StringTie exon      | 7685379 | 7685453 | . | + | . | transcript_MSTRG.14604.lgene_id | MSTRG.14604; |
| 15 StringTie exon      | 7698343 | 7699992 | . | + | . | transcript_MSTRG.14604.lgene_id | MSTRG.14604; |
| 15 StringTie transcrip | 7685989 | 7700005 | . | + | . | transcript_MSTRG.14604.lgene_id | MSTRG.14604; |
| 15 StringTie exon      | 7685989 | 7686087 | . | + | . | transcript_MSTRG.14604.lgene_id | MSTRG.14604; |
| 15 StringTie exon      | 7698343 | 7700005 | . | + | . | transcript_MSTRG.14604.lgene_id | MSTRG.14604; |

|                         |          |          |   |   |   |                                 |              |
|-------------------------|----------|----------|---|---|---|---------------------------------|--------------|
| 15 StringTie transcript | 7686500  | 7699992  | . | + | . | transcript_MSTRG.14604.7gene_id | MSTRG.14604; |
| 15 StringTie exon       | 7686500  | 7687086  | . | + | . | transcript_MSTRG.14604.7gene_id | MSTRG.14604; |
| 15 StringTie exon       | 7698343  | 7699992  | . | + | . | transcript_MSTRG.14604.7gene_id | MSTRG.14604; |
| 15 StringTie transcript | 7686500  | 7700204  | . | + | . | transcript_MSTRG.14604.6gene_id | MSTRG.14604; |
| 15 StringTie exon       | 7686500  | 7687114  | . | + | . | transcript_MSTRG.14604.6gene_id | MSTRG.14604; |
| 15 StringTie exon       | 7698343  | 7700204  | . | + | . | transcript_MSTRG.14604.6gene_id | MSTRG.14604; |
| 15 StringTie transcript | 31318403 | 31320372 | . | + | . | transcript_MSTRG.14968.1gene_id | MSTRG.14968; |
| 15 StringTie exon       | 31318403 | 31319369 | . | + | . | transcript_MSTRG.14968.1gene_id | MSTRG.14968; |
| 15 StringTie exon       | 31320035 | 31320372 | . | + | . | transcript_MSTRG.14968.1gene_id | MSTRG.14968; |
| 15 StringTie transcript | 31502979 | 31508308 | . | + | . | transcript_MSTRG.14970.5gene_id | MSTRG.14970; |
| 15 StringTie exon       | 31502979 | 31503190 | . | + | . | transcript_MSTRG.14970.5gene_id | MSTRG.14970; |
| 15 StringTie exon       | 31507359 | 31508308 | . | + | . | transcript_MSTRG.14970.5gene_id | MSTRG.14970; |
| 15 StringTie transcript | 31502979 | 31508501 | . | + | . | transcript_MSTRG.14970.4gene_id | MSTRG.14970; |
| 15 StringTie exon       | 31502979 | 31503190 | . | + | . | transcript_MSTRG.14970.4gene_id | MSTRG.14970; |
| 15 StringTie exon       | 31504973 | 31505034 | . | + | . | transcript_MSTRG.14970.4gene_id | MSTRG.14970; |
| 15 StringTie exon       | 31507359 | 31508501 | . | + | . | transcript_MSTRG.14970.4gene_id | MSTRG.14970; |
| 15 StringTie transcript | 31502979 | 31508501 | . | + | . | transcript_MSTRG.14970.1gene_id | MSTRG.14970; |
| 15 StringTie exon       | 31502979 | 31503168 | . | + | . | transcript_MSTRG.14970.1gene_id | MSTRG.14970; |
| 15 StringTie exon       | 31504973 | 31505034 | . | + | . | transcript_MSTRG.14970.1gene_id | MSTRG.14970; |
| 15 StringTie exon       | 31507359 | 31508501 | . | + | . | transcript_MSTRG.14970.1gene_id | MSTRG.14970; |
| 15 StringTie transcript | 31502993 | 31508462 | . | + | . | transcript_MSTRG.14970.4gene_id | MSTRG.14970; |
| 15 StringTie exon       | 31502993 | 31503362 | . | + | . | transcript_MSTRG.14970.4gene_id | MSTRG.14970; |
| 15 StringTie exon       | 31504973 | 31505034 | . | + | . | transcript_MSTRG.14970.4gene_id | MSTRG.14970; |
| 15 StringTie exon       | 31507359 | 31508462 | . | + | . | transcript_MSTRG.14970.4gene_id | MSTRG.14970; |
| 15 StringTie transcript | 31502995 | 31508308 | . | + | . | transcript_MSTRG.14970.5gene_id | MSTRG.14970; |
| 15 StringTie exon       | 31502995 | 31503168 | . | + | . | transcript_MSTRG.14970.5gene_id | MSTRG.14970; |
| 15 StringTie exon       | 31507359 | 31508308 | . | + | . | transcript_MSTRG.14970.5gene_id | MSTRG.14970; |
| 15 StringTie transcript | 34362669 | 34375105 | . | + | . | transcript_MSTRG.15019.1gene_id | MSTRG.15019; |
| 15 StringTie exon       | 34362669 | 34362706 | . | + | . | transcript_MSTRG.15019.1gene_id | MSTRG.15019; |
| 15 StringTie exon       | 34362801 | 34363092 | . | + | . | transcript_MSTRG.15019.1gene_id | MSTRG.15019; |
| 15 StringTie exon       | 34363179 | 34363289 | . | + | . | transcript_MSTRG.15019.1gene_id | MSTRG.15019; |
| 15 StringTie exon       | 34374656 | 34374726 | . | + | . | transcript_MSTRG.15019.1gene_id | MSTRG.15019; |
| 15 StringTie exon       | 34374823 | 34375105 | . | + | . | transcript_MSTRG.15019.1gene_id | MSTRG.15019; |
| 15 StringTie transcript | 47694065 | 47694771 | . | + | . | transcript_MSTRG.15186.1gene_id | MSTRG.15186; |
| 15 StringTie exon       | 47694065 | 47694105 | . | + | . | transcript_MSTRG.15186.1gene_id | MSTRG.15186; |

|                        |          |          |   |   |   |                                 |              |
|------------------------|----------|----------|---|---|---|---------------------------------|--------------|
| 15 StringTie exon      | 47694331 | 47694771 | . | + | . | transcript_MSTRG.15186.lgene_id | MSTRG.15186; |
| 15 StringTie transcrip | 47809230 | 47811781 | . | + | . | transcript_MSTRG.15190.lgene_id | MSTRG.15190; |
| 15 StringTie exon      | 47809230 | 47809300 | . | + | . | transcript_MSTRG.15190.lgene_id | MSTRG.15190; |
| 15 StringTie exon      | 47811053 | 47811781 | . | + | . | transcript_MSTRG.15190.lgene_id | MSTRG.15190; |
| 15 StringTie transcrip | 52199842 | 52232611 | . | + | . | transcript_MSTRG.15223.lgene_id | MSTRG.15223; |
| 15 StringTie exon      | 52199842 | 52199891 | . | + | . | transcript_MSTRG.15223.lgene_id | MSTRG.15223; |
| 15 StringTie exon      | 52218528 | 52218660 | . | + | . | transcript_MSTRG.15223.lgene_id | MSTRG.15223; |
| 15 StringTie exon      | 52232524 | 52232611 | . | + | . | transcript_MSTRG.15223.lgene_id | MSTRG.15223; |
| 15 StringTie transcrip | 54086532 | 54093809 | . | + | . | transcript_MSTRG.15256.lgene_id | MSTRG.15256; |
| 15 StringTie exon      | 54086532 | 54086704 | . | + | . | transcript_MSTRG.15256.lgene_id | MSTRG.15256; |
| 15 StringTie exon      | 54093677 | 54093809 | . | + | . | transcript_MSTRG.15256.lgene_id | MSTRG.15256; |
| 15 StringTie transcrip | 58992400 | 59045286 | . | + | . | transcript_MSTRG.15319.lgene_id | MSTRG.15319; |
| 15 StringTie exon      | 58992400 | 58992447 | . | + | . | transcript_MSTRG.15319.lgene_id | MSTRG.15319; |
| 15 StringTie exon      | 59045135 | 59045286 | . | + | . | transcript_MSTRG.15319.lgene_id | MSTRG.15319; |
| 15 StringTie transcrip | 58992410 | 59045295 | . | + | . | transcript_MSTRG.15319.lgene_id | MSTRG.15319; |
| 15 StringTie exon      | 58992410 | 58992447 | . | + | . | transcript_MSTRG.15319.lgene_id | MSTRG.15319; |
| 15 StringTie exon      | 59045132 | 59045295 | . | + | . | transcript_MSTRG.15319.lgene_id | MSTRG.15319; |
| 15 StringTie transcrip | 64599512 | 64763746 | . | + | . | transcript_MSTRG.15392.lgene_id | MSTRG.15392; |
| 15 StringTie exon      | 64599512 | 64599595 | . | + | . | transcript_MSTRG.15392.lgene_id | MSTRG.15392; |
| 15 StringTie exon      | 64763319 | 64763746 | . | + | . | transcript_MSTRG.15392.lgene_id | MSTRG.15392; |
| 15 StringTie transcrip | 65824543 | 65859228 | . | + | . | transcript_MSTRG.15446.lgene_id | MSTRG.15446; |
| 15 StringTie exon      | 65824543 | 65824641 | . | + | . | transcript_MSTRG.15446.lgene_id | MSTRG.15446; |
| 15 StringTie exon      | 65845468 | 65845618 | . | + | . | transcript_MSTRG.15446.lgene_id | MSTRG.15446; |
| 15 StringTie exon      | 65857252 | 65859228 | . | + | . | transcript_MSTRG.15446.lgene_id | MSTRG.15446; |
| 15 StringTie transcrip | 66571061 | 66589276 | . | + | . | transcript_MSTRG.15476.lgene_id | MSTRG.15476; |
| 15 StringTie exon      | 66571061 | 66571128 | . | + | . | transcript_MSTRG.15476.lgene_id | MSTRG.15476; |
| 15 StringTie exon      | 66587749 | 66589276 | . | + | . | transcript_MSTRG.15476.lgene_id | MSTRG.15476; |
| 15 StringTie transcrip | 67170285 | 67178136 | . | + | . | transcript_MSTRG.15463.lgene_id | MSTRG.15463; |
| 15 StringTie exon      | 67170285 | 67171710 | . | + | . | transcript_MSTRG.15463.lgene_id | MSTRG.15463; |
| 15 StringTie exon      | 67176718 | 67178136 | . | + | . | transcript_MSTRG.15463.lgene_id | MSTRG.15463; |
| 15 StringTie transcrip | 67192572 | 67194047 | . | + | . | transcript_MSTRG.15470.lgene_id | MSTRG.15470; |
| 15 StringTie exon      | 67192572 | 67192878 | . | + | . | transcript_MSTRG.15470.lgene_id | MSTRG.15470; |
| 15 StringTie exon      | 67192940 | 67194047 | . | + | . | transcript_MSTRG.15470.lgene_id | MSTRG.15470; |
| 15 StringTie transcrip | 72445992 | 72460562 | . | + | . | transcript_MSTRG.15535.lgene_id | MSTRG.15535; |
| 15 StringTie exon      | 72445992 | 72446242 | . | + | . | transcript_MSTRG.15535.lgene_id | MSTRG.15535; |

|                        |           |           |   |   |   |                                 |              |
|------------------------|-----------|-----------|---|---|---|---------------------------------|--------------|
| 15 StringTie exon      | 72460519  | 72460562  | . | + | . | transcript_MSTRG.15535.lgene_id | MSTRG.15535; |
| 15 StringTie transcrip | 80535703  | 80536904  | . | + | . | transcript_MSTRG.15669.lgene_id | MSTRG.15669; |
| 15 StringTie exon      | 80535703  | 80535945  | . | + | . | transcript_MSTRG.15669.lgene_id | MSTRG.15669; |
| 15 StringTie exon      | 80536025  | 80536904  | . | + | . | transcript_MSTRG.15669.lgene_id | MSTRG.15669; |
| 15 StringTie transcrip | 80551529  | 80551994  | . | + | . | transcript_MSTRG.15670.lgene_id | MSTRG.15670; |
| 15 StringTie exon      | 80551529  | 80551755  | . | + | . | transcript_MSTRG.15670.lgene_id | MSTRG.15670; |
| 15 StringTie exon      | 80551866  | 80551994  | . | + | . | transcript_MSTRG.15670.lgene_id | MSTRG.15670; |
| 15 StringTie transcrip | 81678633  | 81681344  | . | + | . | transcript_MSTRG.15726.lgene_id | MSTRG.15726; |
| 15 StringTie exon      | 81678633  | 81678726  | . | + | . | transcript_MSTRG.15726.lgene_id | MSTRG.15726; |
| 15 StringTie exon      | 81679047  | 81681344  | . | + | . | transcript_MSTRG.15726.lgene_id | MSTRG.15726; |
| 15 StringTie transcrip | 83007898  | 83009998  | . | + | . | transcript_MSTRG.15756.lgene_id | MSTRG.15756; |
| 15 StringTie exon      | 83007898  | 83008177  | . | + | . | transcript_MSTRG.15756.lgene_id | MSTRG.15756; |
| 15 StringTie exon      | 83009793  | 83009998  | . | + | . | transcript_MSTRG.15756.lgene_id | MSTRG.15756; |
| 15 StringTie transcrip | 84438509  | 84445238  | . | + | . | transcript_MSTRG.16070.lgene_id | MSTRG.16070; |
| 15 StringTie exon      | 84438509  | 84439810  | . | + | . | transcript_MSTRG.16070.lgene_id | MSTRG.16070; |
| 15 StringTie exon      | 84439867  | 84445238  | . | + | . | transcript_MSTRG.16070.lgene_id | MSTRG.16070; |
| 15 StringTie transcrip | 84484845  | 84531166  | . | + | . | transcript_MSTRG.16072.lgene_id | MSTRG.16072; |
| 15 StringTie exon      | 84484845  | 84484860  | . | + | . | transcript_MSTRG.16072.lgene_id | MSTRG.16072; |
| 15 StringTie exon      | 84530959  | 84531166  | . | + | . | transcript_MSTRG.16072.lgene_id | MSTRG.16072; |
| 15 StringTie transcrip | 91525509  | 91527843  | . | + | . | transcript_MSTRG.15907.lgene_id | MSTRG.15907; |
| 15 StringTie exon      | 91525509  | 91526689  | . | + | . | transcript_MSTRG.15907.lgene_id | MSTRG.15907; |
| 15 StringTie exon      | 91527172  | 91527843  | . | + | . | transcript_MSTRG.15907.lgene_id | MSTRG.15907; |
| 15 StringTie transcrip | 93285654  | 93322581  | . | + | . | transcript_MSTRG.15949.lgene_id | MSTRG.15949; |
| 15 StringTie exon      | 93285654  | 93285882  | . | + | . | transcript_MSTRG.15949.lgene_id | MSTRG.15949; |
| 15 StringTie exon      | 93297570  | 93297659  | . | + | . | transcript_MSTRG.15949.lgene_id | MSTRG.15949; |
| 15 StringTie exon      | 93321648  | 93322581  | . | + | . | transcript_MSTRG.15949.lgene_id | MSTRG.15949; |
| 15 StringTie transcrip | 93412398  | 93519867  | . | + | . | transcript_MSTRG.15952.lgene_id | MSTRG.15952; |
| 15 StringTie exon      | 93412398  | 93412492  | . | + | . | transcript_MSTRG.15952.lgene_id | MSTRG.15952; |
| 15 StringTie exon      | 93512279  | 93512380  | . | + | . | transcript_MSTRG.15952.lgene_id | MSTRG.15952; |
| 15 StringTie exon      | 93519638  | 93519867  | . | + | . | transcript_MSTRG.15952.lgene_id | MSTRG.15952; |
| 15 StringTie transcrip | 101602740 | 101623680 | . | + | . | transcript_MSTRG.16218.lgene_id | MSTRG.16218; |
| 15 StringTie exon      | 101602740 | 101602763 | . | + | . | transcript_MSTRG.16218.lgene_id | MSTRG.16218; |
| 15 StringTie exon      | 101616863 | 101616951 | . | + | . | transcript_MSTRG.16218.lgene_id | MSTRG.16218; |
| 15 StringTie exon      | 101618374 | 101618467 | . | + | . | transcript_MSTRG.16218.lgene_id | MSTRG.16218; |
| 15 StringTie exon      | 101623287 | 101623680 | . | + | . | transcript_MSTRG.16218.lgene_id | MSTRG.16218; |

|                         |           |           |   |   |   |                                 |              |
|-------------------------|-----------|-----------|---|---|---|---------------------------------|--------------|
| 15 StringTie transcript | 106765709 | 106775481 | . | + | . | transcript_MSTRG.16358.lgene_id | MSTRG.16358; |
| 15 StringTie exon       | 106765709 | 106773175 | . | + | . | transcript_MSTRG.16358.lgene_id | MSTRG.16358; |
| 15 StringTie exon       | 106775389 | 106775481 | . | + | . | transcript_MSTRG.16358.lgene_id | MSTRG.16358; |
| 15 StringTie transcript | 126567967 | 126568549 | . | + | . | transcript_MSTRG.16742.lgene_id | MSTRG.16742; |
| 15 StringTie exon       | 126567967 | 126568296 | . | + | . | transcript_MSTRG.16742.lgene_id | MSTRG.16742; |
| 15 StringTie exon       | 126568372 | 126568549 | . | + | . | transcript_MSTRG.16742.lgene_id | MSTRG.16742; |
| 15 StringTie transcript | 132171104 | 132171347 | . | + | . | transcript_MSTRG.16808.lgene_id | MSTRG.16808; |
| 15 StringTie exon       | 132171104 | 132171214 | . | + | . | transcript_MSTRG.16808.lgene_id | MSTRG.16808; |
| 15 StringTie exon       | 132171257 | 132171347 | . | + | . | transcript_MSTRG.16808.lgene_id | MSTRG.16808; |
| 15 StringTie transcript | 133756683 | 133759125 | . | + | . | transcript_MSTRG.16830.lgene_id | MSTRG.16830; |
| 15 StringTie exon       | 133756683 | 133758023 | . | + | . | transcript_MSTRG.16830.lgene_id | MSTRG.16830; |
| 15 StringTie exon       | 133758531 | 133759125 | . | + | . | transcript_MSTRG.16830.lgene_id | MSTRG.16830; |
| 15 StringTie transcript | 136855154 | 136859849 | . | + | . | transcript_MSTRG.16870.lgene_id | MSTRG.16870; |
| 15 StringTie exon       | 136855154 | 136855435 | . | + | . | transcript_MSTRG.16870.lgene_id | MSTRG.16870; |
| 15 StringTie exon       | 136855881 | 136859849 | . | + | . | transcript_MSTRG.16870.lgene_id | MSTRG.16870; |
| 15 StringTie transcript | 137025831 | 137026112 | . | + | . | transcript_MSTRG.16882.lgene_id | MSTRG.16882; |
| 15 StringTie exon       | 137025831 | 137025941 | . | + | . | transcript_MSTRG.16882.lgene_id | MSTRG.16882; |
| 15 StringTie exon       | 137025972 | 137026112 | . | + | . | transcript_MSTRG.16882.lgene_id | MSTRG.16882; |
| 15 StringTie transcript | 137025831 | 137026112 | . | + | . | transcript_MSTRG.16882.lgene_id | MSTRG.16882; |
| 15 StringTie exon       | 137025831 | 137025941 | . | + | . | transcript_MSTRG.16882.lgene_id | MSTRG.16882; |
| 15 StringTie exon       | 137026002 | 137026112 | . | + | . | transcript_MSTRG.16882.lgene_id | MSTRG.16882; |
| 15 StringTie transcript | 137833729 | 137834533 | . | + | . | transcript_MSTRG.16902.lgene_id | MSTRG.16902; |
| 15 StringTie exon       | 137833729 | 137834065 | . | + | . | transcript_MSTRG.16902.lgene_id | MSTRG.16902; |
| 15 StringTie exon       | 137834257 | 137834533 | . | + | . | transcript_MSTRG.16902.lgene_id | MSTRG.16902; |
| 15 StringTie transcript | 138471378 | 138472849 | . | + | . | transcript_MSTRG.16920.lgene_id | MSTRG.16920; |
| 15 StringTie exon       | 138471378 | 138471564 | . | + | . | transcript_MSTRG.16920.lgene_id | MSTRG.16920; |
| 15 StringTie exon       | 138472522 | 138472849 | . | + | . | transcript_MSTRG.16920.lgene_id | MSTRG.16920; |
| 15 StringTie transcript | 138682805 | 138684638 | . | + | . | transcript_MSTRG.16904.lgene_id | MSTRG.16904; |
| 15 StringTie exon       | 138682805 | 138682927 | . | + | . | transcript_MSTRG.16904.lgene_id | MSTRG.16904; |
| 15 StringTie exon       | 138683919 | 138684638 | . | + | . | transcript_MSTRG.16904.lgene_id | MSTRG.16904; |
| 15 StringTie transcript | 632892    | 635989    | . | - | . | transcript_MSTRG.14753.lgene_id | MSTRG.14753; |
| 15 StringTie exon       | 632892    | 633019    | . | - | . | transcript_MSTRG.14753.lgene_id | MSTRG.14753; |
| 15 StringTie exon       | 635853    | 635989    | . | - | . | transcript_MSTRG.14753.lgene_id | MSTRG.14753; |
| 15 StringTie transcript | 635564    | 643595    | . | - | . | transcript_MSTRG.14754.lgene_id | MSTRG.14754; |
| 15 StringTie exon       | 635564    | 635852    | . | - | . | transcript_MSTRG.14754.lgene_id | MSTRG.14754; |

|                        |          |          |   |   |   |                                 |              |
|------------------------|----------|----------|---|---|---|---------------------------------|--------------|
| 15 StringTie exon      | 643139   | 643595   | . | - | . | transcript_MSTRG.14754.lgene_id | MSTRG.14754; |
| 15 StringTie transcrip | 2181788  | 2495723  | . | - | . | transcript_MSTRG.14538.lgene_id | MSTRG.14538; |
| 15 StringTie exon      | 2181788  | 2181968  | . | - | . | transcript_MSTRG.14538.lgene_id | MSTRG.14538; |
| 15 StringTie exon      | 2201659  | 2201857  | . | - | . | transcript_MSTRG.14538.lgene_id | MSTRG.14538; |
| 15 StringTie exon      | 2495672  | 2495723  | . | - | . | transcript_MSTRG.14538.lgene_id | MSTRG.14538; |
| 15 StringTie transcrip | 2473719  | 2474470  | . | - | . | transcript_MSTRG.14540.lgene_id | MSTRG.14540; |
| 15 StringTie exon      | 2473719  | 2473797  | . | - | . | transcript_MSTRG.14540.lgene_id | MSTRG.14540; |
| 15 StringTie exon      | 2473898  | 2474470  | . | - | . | transcript_MSTRG.14540.lgene_id | MSTRG.14540; |
| 15 StringTie transcrip | 3787964  | 3788720  | . | - | . | transcript_MSTRG.14586.lgene_id | MSTRG.14586; |
| 15 StringTie exon      | 3787964  | 3788390  | . | - | . | transcript_MSTRG.14586.lgene_id | MSTRG.14586; |
| 15 StringTie exon      | 3788684  | 3788720  | . | - | . | transcript_MSTRG.14586.lgene_id | MSTRG.14586; |
| 15 StringTie transcrip | 6849546  | 7073402  | . | - | . | transcript_MSTRG.14575.lgene_id | MSTRG.14575; |
| 15 StringTie exon      | 6849546  | 6849600  | . | - | . | transcript_MSTRG.14575.lgene_id | MSTRG.14575; |
| 15 StringTie exon      | 7027549  | 7027732  | . | - | . | transcript_MSTRG.14575.lgene_id | MSTRG.14575; |
| 15 StringTie exon      | 7073375  | 7073402  | . | - | . | transcript_MSTRG.14575.lgene_id | MSTRG.14575; |
| 15 StringTie transcrip | 7489953  | 7495344  | . | - | . | transcript_MSTRG.14583.lgene_id | MSTRG.14583; |
| 15 StringTie exon      | 7489953  | 7490614  | . | - | . | transcript_MSTRG.14583.lgene_id | MSTRG.14583; |
| 15 StringTie exon      | 7491382  | 7491611  | . | - | . | transcript_MSTRG.14583.lgene_id | MSTRG.14583; |
| 15 StringTie exon      | 7493812  | 7493970  | . | - | . | transcript_MSTRG.14583.lgene_id | MSTRG.14583; |
| 15 StringTie exon      | 7495113  | 7495344  | . | - | . | transcript_MSTRG.14583.lgene_id | MSTRG.14583; |
| 15 StringTie transcrip | 20043297 | 20043654 | . | - | . | transcript_MSTRG.14812.lgene_id | MSTRG.14812; |
| 15 StringTie exon      | 20043297 | 20043495 | . | - | . | transcript_MSTRG.14812.lgene_id | MSTRG.14812; |
| 15 StringTie exon      | 20043603 | 20043654 | . | - | . | transcript_MSTRG.14812.lgene_id | MSTRG.14812; |
| 15 StringTie transcrip | 44898868 | 44917584 | . | - | . | transcript_MSTRG.15102.lgene_id | MSTRG.15102; |
| 15 StringTie exon      | 44898868 | 44901404 | . | - | . | transcript_MSTRG.15102.lgene_id | MSTRG.15102; |
| 15 StringTie exon      | 44908934 | 44909093 | . | - | . | transcript_MSTRG.15102.lgene_id | MSTRG.15102; |
| 15 StringTie exon      | 44917481 | 44917584 | . | - | . | transcript_MSTRG.15102.lgene_id | MSTRG.15102; |
| 15 StringTie transcrip | 46197637 | 46197900 | . | - | . | transcript_MSTRG.15134.lgene_id | MSTRG.15134; |
| 15 StringTie exon      | 46197637 | 46197747 | . | - | . | transcript_MSTRG.15134.lgene_id | MSTRG.15134; |
| 15 StringTie exon      | 46197790 | 46197900 | . | - | . | transcript_MSTRG.15134.lgene_id | MSTRG.15134; |
| 15 StringTie transcrip | 70676207 | 70724074 | . | - | . | transcript_MSTRG.15505.lgene_id | MSTRG.15505; |
| 15 StringTie exon      | 70676207 | 70676465 | . | - | . | transcript_MSTRG.15505.lgene_id | MSTRG.15505; |
| 15 StringTie exon      | 70723997 | 70724074 | . | - | . | transcript_MSTRG.15505.lgene_id | MSTRG.15505; |
| 15 StringTie transcrip | 70696118 | 70720135 | . | - | . | transcript_MSTRG.15507.lgene_id | MSTRG.15507; |
| 15 StringTie exon      | 70696118 | 70696302 | . | - | . | transcript_MSTRG.15507.lgene_id | MSTRG.15507; |

|                         |          |          |   |   |   |                                 |              |
|-------------------------|----------|----------|---|---|---|---------------------------------|--------------|
| 15 StringTie exon       | 70720015 | 70720135 | . | - | . | transcript_MSTRG.15507.lgene_id | MSTRG.15507; |
| 15 StringTie transcript | 75786166 | 75790314 | . | - | . | transcript_MSTRG.15561.lgene_id | MSTRG.15561; |
| 15 StringTie exon       | 75786166 | 75786338 | . | - | . | transcript_MSTRG.15561.lgene_id | MSTRG.15561; |
| 15 StringTie exon       | 75790201 | 75790314 | . | - | . | transcript_MSTRG.15561.lgene_id | MSTRG.15561; |
| 15 StringTie transcript | 78619031 | 78641445 | . | - | . | transcript_MSTRG.15633.lgene_id | MSTRG.15633; |
| 15 StringTie exon       | 78619031 | 78619580 | . | - | . | transcript_MSTRG.15633.lgene_id | MSTRG.15633; |
| 15 StringTie exon       | 78640800 | 78640884 | . | - | . | transcript_MSTRG.15633.lgene_id | MSTRG.15633; |
| 15 StringTie exon       | 78641288 | 78641445 | . | - | . | transcript_MSTRG.15633.lgene_id | MSTRG.15633; |
| 15 StringTie transcript | 78680635 | 78708958 | . | - | . | transcript_MSTRG.15647.lgene_id | MSTRG.15647; |
| 15 StringTie exon       | 78680635 | 78681113 | . | - | . | transcript_MSTRG.15647.lgene_id | MSTRG.15647; |
| 15 StringTie exon       | 78708059 | 78708094 | . | - | . | transcript_MSTRG.15647.lgene_id | MSTRG.15647; |
| 15 StringTie exon       | 78708903 | 78708958 | . | - | . | transcript_MSTRG.15647.lgene_id | MSTRG.15647; |
| 15 StringTie transcript | 78721317 | 78774255 | . | - | . | transcript_MSTRG.15651.lgene_id | MSTRG.15651; |
| 15 StringTie exon       | 78721317 | 78722235 | . | - | . | transcript_MSTRG.15651.lgene_id | MSTRG.15651; |
| 15 StringTie exon       | 78723276 | 78723477 | . | - | . | transcript_MSTRG.15651.lgene_id | MSTRG.15651; |
| 15 StringTie exon       | 78733684 | 78733766 | . | - | . | transcript_MSTRG.15651.lgene_id | MSTRG.15651; |
| 15 StringTie exon       | 78771975 | 78772183 | . | - | . | transcript_MSTRG.15651.lgene_id | MSTRG.15651; |
| 15 StringTie exon       | 78773788 | 78774255 | . | - | . | transcript_MSTRG.15651.lgene_id | MSTRG.15651; |
| 15 StringTie transcript | 79253739 | 79256433 | . | - | . | transcript_MSTRG.15655.lgene_id | MSTRG.15655; |
| 15 StringTie exon       | 79253739 | 79254526 | . | - | . | transcript_MSTRG.15655.lgene_id | MSTRG.15655; |
| 15 StringTie exon       | 79256409 | 79256433 | . | - | . | transcript_MSTRG.15655.lgene_id | MSTRG.15655; |
| 15 StringTie transcript | 81935537 | 81938117 | . | - | . | transcript_MSTRG.15722.lgene_id | MSTRG.15722; |
| 15 StringTie exon       | 81935537 | 81936330 | . | - | . | transcript_MSTRG.15722.lgene_id | MSTRG.15722; |
| 15 StringTie exon       | 81938009 | 81938117 | . | - | . | transcript_MSTRG.15722.lgene_id | MSTRG.15722; |
| 15 StringTie transcript | 81975462 | 81987753 | . | - | . | transcript_MSTRG.15732.lgene_id | MSTRG.15732; |
| 15 StringTie exon       | 81975462 | 81976055 | . | - | . | transcript_MSTRG.15732.lgene_id | MSTRG.15732; |
| 15 StringTie exon       | 81976985 | 81977168 | . | - | . | transcript_MSTRG.15732.lgene_id | MSTRG.15732; |
| 15 StringTie exon       | 81987597 | 81987753 | . | - | . | transcript_MSTRG.15732.lgene_id | MSTRG.15732; |
| 15 StringTie transcript | 83137991 | 83146145 | . | - | . | transcript_MSTRG.15776.lgene_id | MSTRG.15776; |
| 15 StringTie exon       | 83137991 | 83138205 | . | - | . | transcript_MSTRG.15776.lgene_id | MSTRG.15776; |
| 15 StringTie exon       | 83143710 | 83143791 | . | - | . | transcript_MSTRG.15776.lgene_id | MSTRG.15776; |
| 15 StringTie exon       | 83146056 | 83146145 | . | - | . | transcript_MSTRG.15776.lgene_id | MSTRG.15776; |
| 15 StringTie transcript | 88582164 | 88587653 | . | - | . | transcript_MSTRG.15896.lgene_id | MSTRG.15896; |
| 15 StringTie exon       | 88582164 | 88582284 | . | - | . | transcript_MSTRG.15896.lgene_id | MSTRG.15896; |
| 15 StringTie exon       | 88587423 | 88587653 | . | - | . | transcript_MSTRG.15896.lgene_id | MSTRG.15896; |



|                        |          |          |   |   |   |                                 |              |
|------------------------|----------|----------|---|---|---|---------------------------------|--------------|
| 15 StringTie transcrip | 91884490 | 91886091 | . | - | . | transcript_MSTRG.15931.¿gene_id | MSTRG.15931; |
| 15 StringTie exon      | 91884490 | 91884589 | . | - | . | transcript_MSTRG.15931.¿gene_id | MSTRG.15931; |
| 15 StringTie exon      | 91884902 | 91885052 | . | - | . | transcript_MSTRG.15931.¿gene_id | MSTRG.15931; |
| 15 StringTie exon      | 91886041 | 91886091 | . | - | . | transcript_MSTRG.15931.¿gene_id | MSTRG.15931; |
| 15 StringTie transcrip | 93314056 | 93321330 | . | - | . | transcript_MSTRG.15950.¿gene_id | MSTRG.15950; |
| 15 StringTie exon      | 93314056 | 93314699 | . | - | . | transcript_MSTRG.15950.¿gene_id | MSTRG.15950; |
| 15 StringTie exon      | 93320538 | 93321330 | . | - | . | transcript_MSTRG.15950.¿gene_id | MSTRG.15950; |
| 15 StringTie transcrip | 93321715 | 93341671 | . | - | . | transcript_MSTRG.15951.¿gene_id | MSTRG.15951; |
| 15 StringTie exon      | 93321715 | 93322972 | . | - | . | transcript_MSTRG.15951.¿gene_id | MSTRG.15951; |
| 15 StringTie exon      | 93326852 | 93326972 | . | - | . | transcript_MSTRG.15951.¿gene_id | MSTRG.15951; |
| 15 StringTie exon      | 93334932 | 93335003 | . | - | . | transcript_MSTRG.15951.¿gene_id | MSTRG.15951; |
| 15 StringTie exon      | 93341321 | 93341671 | . | - | . | transcript_MSTRG.15951.¿gene_id | MSTRG.15951; |
| 15 StringTie transcrip | 93322745 | 93414630 | . | - | . | transcript_MSTRG.15951.¿gene_id | MSTRG.15951; |
| 15 StringTie exon      | 93322745 | 93322972 | . | - | . | transcript_MSTRG.15951.¿gene_id | MSTRG.15951; |
| 15 StringTie exon      | 93326852 | 93326972 | . | - | . | transcript_MSTRG.15951.¿gene_id | MSTRG.15951; |
| 15 StringTie exon      | 93330016 | 93330108 | . | - | . | transcript_MSTRG.15951.¿gene_id | MSTRG.15951; |
| 15 StringTie exon      | 93334932 | 93335003 | . | - | . | transcript_MSTRG.15951.¿gene_id | MSTRG.15951; |
| 15 StringTie exon      | 93414543 | 93414630 | . | - | . | transcript_MSTRG.15951.¿gene_id | MSTRG.15951; |
| 15 StringTie transcrip | 94008979 | 94134743 | . | - | . | transcript_MSTRG.15975.¿gene_id | MSTRG.15975; |
| 15 StringTie exon      | 94008979 | 94009091 | . | - | . | transcript_MSTRG.15975.¿gene_id | MSTRG.15975; |
| 15 StringTie exon      | 94134312 | 94134743 | . | - | . | transcript_MSTRG.15975.¿gene_id | MSTRG.15975; |
| 15 StringTie transcrip | 95524908 | 95527770 | . | - | . | transcript_MSTRG.16054.¿gene_id | MSTRG.16054; |
| 15 StringTie exon      | 95524908 | 95524996 | . | - | . | transcript_MSTRG.16054.¿gene_id | MSTRG.16054; |
| 15 StringTie exon      | 95526368 | 95527770 | . | - | . | transcript_MSTRG.16054.¿gene_id | MSTRG.16054; |
| 15 StringTie transcrip | 95838609 | 95845076 | . | - | . | transcript_MSTRG.16041.¿gene_id | MSTRG.16041; |
| 15 StringTie exon      | 95838609 | 95839016 | . | - | . | transcript_MSTRG.16041.¿gene_id | MSTRG.16041; |
| 15 StringTie exon      | 95845034 | 95845076 | . | - | . | transcript_MSTRG.16041.¿gene_id | MSTRG.16041; |
| 15 StringTie transcrip | 96209790 | 96313528 | . | - | . | transcript_MSTRG.16057.¿gene_id | MSTRG.16057; |
| 15 StringTie exon      | 96209790 | 96210050 | . | - | . | transcript_MSTRG.16057.¿gene_id | MSTRG.16057; |
| 15 StringTie exon      | 96232202 | 96232236 | . | - | . | transcript_MSTRG.16057.¿gene_id | MSTRG.16057; |
| 15 StringTie exon      | 96312086 | 96312182 | . | - | . | transcript_MSTRG.16057.¿gene_id | MSTRG.16057; |
| 15 StringTie exon      | 96313389 | 96313528 | . | - | . | transcript_MSTRG.16057.¿gene_id | MSTRG.16057; |
| 15 StringTie transcrip | 96246473 | 96278337 | . | - | . | transcript_MSTRG.16057.¿gene_id | MSTRG.16057; |
| 15 StringTie exon      | 96246473 | 96246824 | . | - | . | transcript_MSTRG.16057.¿gene_id | MSTRG.16057; |
| 15 StringTie exon      | 96278165 | 96278337 | . | - | . | transcript_MSTRG.16057.¿gene_id | MSTRG.16057; |

|                         |           |           |   |   |   |                                 |              |
|-------------------------|-----------|-----------|---|---|---|---------------------------------|--------------|
| 15 StringTie transcript | 96246473  | 96313549  | . | - | . | transcript_MSTRG.16057.1gene_id | MSTRG.16057; |
| 15 StringTie exon       | 96246473  | 96246824  | . | - | . | transcript_MSTRG.16057.1gene_id | MSTRG.16057; |
| 15 StringTie exon       | 96312086  | 96312182  | . | - | . | transcript_MSTRG.16057.1gene_id | MSTRG.16057; |
| 15 StringTie exon       | 96313389  | 96313549  | . | - | . | transcript_MSTRG.16057.1gene_id | MSTRG.16057; |
| 15 StringTie transcript | 96278373  | 96313549  | . | - | . | transcript_MSTRG.16057.4gene_id | MSTRG.16057; |
| 15 StringTie exon       | 96278373  | 96278763  | . | - | . | transcript_MSTRG.16057.4gene_id | MSTRG.16057; |
| 15 StringTie exon       | 96312086  | 96312182  | . | - | . | transcript_MSTRG.16057.4gene_id | MSTRG.16057; |
| 15 StringTie exon       | 96313389  | 96313549  | . | - | . | transcript_MSTRG.16057.4gene_id | MSTRG.16057; |
| 15 StringTie transcript | 96280781  | 96313535  | . | - | . | transcript_MSTRG.16057.5gene_id | MSTRG.16057; |
| 15 StringTie exon       | 96280781  | 96281144  | . | - | . | transcript_MSTRG.16057.5gene_id | MSTRG.16057; |
| 15 StringTie exon       | 96312086  | 96312182  | . | - | . | transcript_MSTRG.16057.5gene_id | MSTRG.16057; |
| 15 StringTie exon       | 96313389  | 96313535  | . | - | . | transcript_MSTRG.16057.5gene_id | MSTRG.16057; |
| 15 StringTie transcript | 104182149 | 104183220 | . | - | . | transcript_MSTRG.16263.1gene_id | MSTRG.16263; |
| 15 StringTie exon       | 104182149 | 104182987 | . | - | . | transcript_MSTRG.16263.1gene_id | MSTRG.16263; |
| 15 StringTie exon       | 104183048 | 104183220 | . | - | . | transcript_MSTRG.16263.1gene_id | MSTRG.16263; |
| 15 StringTie transcript | 106945685 | 106947672 | . | - | . | transcript_MSTRG.16352.4gene_id | MSTRG.16352; |
| 15 StringTie exon       | 106945685 | 106946901 | . | - | . | transcript_MSTRG.16352.4gene_id | MSTRG.16352; |
| 15 StringTie exon       | 106947215 | 106947672 | . | - | . | transcript_MSTRG.16352.4gene_id | MSTRG.16352; |
| 15 StringTie transcript | 108910682 | 108913474 | . | - | . | transcript_MSTRG.16364.1gene_id | MSTRG.16364; |
| 15 StringTie exon       | 108910682 | 108910824 | . | - | . | transcript_MSTRG.16364.1gene_id | MSTRG.16364; |
| 15 StringTie exon       | 108910847 | 108913474 | . | - | . | transcript_MSTRG.16364.1gene_id | MSTRG.16364; |
| 15 StringTie transcript | 110565226 | 110697548 | . | - | . | transcript_MSTRG.16422.1gene_id | MSTRG.16422; |
| 15 StringTie exon       | 110565226 | 110565623 | . | - | . | transcript_MSTRG.16422.1gene_id | MSTRG.16422; |
| 15 StringTie exon       | 110566363 | 110566413 | . | - | . | transcript_MSTRG.16422.1gene_id | MSTRG.16422; |
| 15 StringTie exon       | 110695501 | 110695552 | . | - | . | transcript_MSTRG.16422.1gene_id | MSTRG.16422; |
| 15 StringTie exon       | 110697366 | 110697548 | . | - | . | transcript_MSTRG.16422.1gene_id | MSTRG.16422; |
| 15 StringTie transcript | 110849026 | 110859079 | . | - | . | transcript_MSTRG.16420.1gene_id | MSTRG.16420; |
| 15 StringTie exon       | 110849026 | 110849264 | . | - | . | transcript_MSTRG.16420.1gene_id | MSTRG.16420; |
| 15 StringTie exon       | 110858751 | 110859079 | . | - | . | transcript_MSTRG.16420.1gene_id | MSTRG.16420; |
| 15 StringTie transcript | 120319928 | 120333798 | . | - | . | transcript_MSTRG.16589.1gene_id | MSTRG.16589; |
| 15 StringTie exon       | 120319928 | 120320914 | . | - | . | transcript_MSTRG.16589.1gene_id | MSTRG.16589; |
| 15 StringTie exon       | 120333710 | 120333798 | . | - | . | transcript_MSTRG.16589.1gene_id | MSTRG.16589; |
| 15 StringTie transcript | 121272640 | 121272945 | . | - | . | transcript_MSTRG.16611.1gene_id | MSTRG.16611; |
| 15 StringTie exon       | 121272640 | 121272741 | . | - | . | transcript_MSTRG.16611.1gene_id | MSTRG.16611; |
| 15 StringTie exon       | 121272846 | 121272945 | . | - | . | transcript_MSTRG.16611.1gene_id | MSTRG.16611; |

|                         |           |           |   |   |   |                                 |              |
|-------------------------|-----------|-----------|---|---|---|---------------------------------|--------------|
| 15 StringTie transcript | 121434646 | 121435254 | . | - | . | transcript_MSTRG.16664.lgene_id | MSTRG.16664; |
| 15 StringTie exon       | 121434646 | 121434756 | . | - | . | transcript_MSTRG.16664.lgene_id | MSTRG.16664; |
| 15 StringTie exon       | 121435144 | 121435254 | . | - | . | transcript_MSTRG.16664.lgene_id | MSTRG.16664; |
| 15 StringTie transcript | 127660272 | 127706625 | . | - | . | transcript_MSTRG.16727.{gene_id | MSTRG.16727; |
| 15 StringTie exon       | 127660272 | 127660791 | . | - | . | transcript_MSTRG.16727.{gene_id | MSTRG.16727; |
| 15 StringTie exon       | 127706451 | 127706625 | . | - | . | transcript_MSTRG.16727.{gene_id | MSTRG.16727; |
| 15 StringTie transcript | 127660323 | 127685193 | . | - | . | transcript_MSTRG.16727.{gene_id | MSTRG.16727; |
| 15 StringTie exon       | 127660323 | 127660791 | . | - | . | transcript_MSTRG.16727.{gene_id | MSTRG.16727; |
| 15 StringTie exon       | 127684189 | 127685193 | . | - | . | transcript_MSTRG.16727.{gene_id | MSTRG.16727; |
| 15 StringTie transcript | 127660323 | 127706638 | . | - | . | transcript_MSTRG.16727.4gene_id | MSTRG.16727; |
| 15 StringTie exon       | 127660323 | 127660791 | . | - | . | transcript_MSTRG.16727.4gene_id | MSTRG.16727; |
| 15 StringTie exon       | 127661751 | 127661932 | . | - | . | transcript_MSTRG.16727.4gene_id | MSTRG.16727; |
| 15 StringTie exon       | 127700915 | 127701862 | . | - | . | transcript_MSTRG.16727.4gene_id | MSTRG.16727; |
| 15 StringTie exon       | 127705061 | 127705218 | . | - | . | transcript_MSTRG.16727.4gene_id | MSTRG.16727; |
| 15 StringTie exon       | 127706157 | 127706638 | . | - | . | transcript_MSTRG.16727.4gene_id | MSTRG.16727; |
| 15 StringTie transcript | 127661123 | 127706664 | . | - | . | transcript_MSTRG.16727.(gene_id | MSTRG.16727; |
| 15 StringTie exon       | 127661123 | 127661932 | . | - | . | transcript_MSTRG.16727.(gene_id | MSTRG.16727; |
| 15 StringTie exon       | 127700915 | 127701024 | . | - | . | transcript_MSTRG.16727.(gene_id | MSTRG.16727; |
| 15 StringTie exon       | 127705061 | 127705218 | . | - | . | transcript_MSTRG.16727.(gene_id | MSTRG.16727; |
| 15 StringTie exon       | 127705817 | 127706664 | . | - | . | transcript_MSTRG.16727.(gene_id | MSTRG.16727; |
| 15 StringTie transcript | 127661139 | 127706638 | . | - | . | transcript_MSTRG.16727.7gene_id | MSTRG.16727; |
| 15 StringTie exon       | 127661139 | 127661932 | . | - | . | transcript_MSTRG.16727.7gene_id | MSTRG.16727; |
| 15 StringTie exon       | 127684189 | 127684299 | . | - | . | transcript_MSTRG.16727.7gene_id | MSTRG.16727; |
| 15 StringTie exon       | 127700915 | 127701862 | . | - | . | transcript_MSTRG.16727.7gene_id | MSTRG.16727; |
| 15 StringTie exon       | 127703974 | 127706638 | . | - | . | transcript_MSTRG.16727.7gene_id | MSTRG.16727; |
| 15 StringTie transcript | 127661602 | 127706638 | . | - | . | transcript_MSTRG.16727.{gene_id | MSTRG.16727; |
| 15 StringTie exon       | 127661602 | 127661932 | . | - | . | transcript_MSTRG.16727.{gene_id | MSTRG.16727; |
| 15 StringTie exon       | 127700915 | 127701862 | . | - | . | transcript_MSTRG.16727.{gene_id | MSTRG.16727; |
| 15 StringTie exon       | 127706451 | 127706638 | . | - | . | transcript_MSTRG.16727.{gene_id | MSTRG.16727; |
| 15 StringTie transcript | 127661606 | 127706616 | . | - | . | transcript_MSTRG.16727.{gene_id | MSTRG.16727; |
| 15 StringTie exon       | 127661606 | 127661932 | . | - | . | transcript_MSTRG.16727.{gene_id | MSTRG.16727; |
| 15 StringTie exon       | 127700915 | 127701862 | . | - | . | transcript_MSTRG.16727.{gene_id | MSTRG.16727; |
| 15 StringTie exon       | 127706157 | 127706616 | . | - | . | transcript_MSTRG.16727.{gene_id | MSTRG.16727; |
| 15 StringTie transcript | 127661606 | 127706616 | . | - | . | transcript_MSTRG.16727.lgene_id | MSTRG.16727; |
| 15 StringTie exon       | 127661606 | 127661932 | . | - | . | transcript_MSTRG.16727.lgene_id | MSTRG.16727; |

|                         |           |           |   |   |   |                                 |              |
|-------------------------|-----------|-----------|---|---|---|---------------------------------|--------------|
| 15 StringTie exon       | 127700915 | 127701862 | . | - | . | transcript_MSTRG.16727.lgene_id | MSTRG.16727; |
| 15 StringTie exon       | 127706182 | 127706616 | . | - | . | transcript_MSTRG.16727.lgene_id | MSTRG.16727; |
| 15 StringTie transcript | 127704304 | 127706616 | . | - | . | transcript_MSTRG.16727.lgene_id | MSTRG.16727; |
| 15 StringTie exon       | 127704304 | 127705218 | . | - | . | transcript_MSTRG.16727.lgene_id | MSTRG.16727; |
| 15 StringTie exon       | 127705822 | 127706106 | . | - | . | transcript_MSTRG.16727.lgene_id | MSTRG.16727; |
| 15 StringTie exon       | 127706451 | 127706616 | . | - | . | transcript_MSTRG.16727.lgene_id | MSTRG.16727; |
| 15 StringTie transcript | 135588451 | 135593554 | . | - | . | transcript_MSTRG.16853.lgene_id | MSTRG.16853; |
| 15 StringTie exon       | 135588451 | 135588644 | . | - | . | transcript_MSTRG.16853.lgene_id | MSTRG.16853; |
| 15 StringTie exon       | 135593473 | 135593554 | . | - | . | transcript_MSTRG.16853.lgene_id | MSTRG.16853; |
| 15 StringTie transcript | 136052662 | 136054534 | . | - | . | transcript_MSTRG.16855.lgene_id | MSTRG.16855; |
| 15 StringTie exon       | 136052662 | 136053449 | . | - | . | transcript_MSTRG.16855.lgene_id | MSTRG.16855; |
| 15 StringTie exon       | 136053759 | 136054534 | . | - | . | transcript_MSTRG.16855.lgene_id | MSTRG.16855; |
| 15 StringTie transcript | 138219902 | 138224265 | . | - | . | transcript_MSTRG.16896.lgene_id | MSTRG.16896; |
| 15 StringTie exon       | 138219902 | 138224265 | . | - | . | transcript_MSTRG.16896.lgene_id | MSTRG.16896; |
| 15 StringTie transcript | 138219910 | 138221878 | . | - | . | transcript_MSTRG.16896.lgene_id | MSTRG.16896; |
| 15 StringTie exon       | 138219910 | 138221057 | . | - | . | transcript_MSTRG.16896.lgene_id | MSTRG.16896; |
| 15 StringTie exon       | 138221543 | 138221878 | . | - | . | transcript_MSTRG.16896.lgene_id | MSTRG.16896; |
| 15 StringTie transcript | 138220050 | 138221861 | . | - | . | transcript_MSTRG.16896.lgene_id | MSTRG.16896; |
| 15 StringTie exon       | 138220050 | 138221057 | . | - | . | transcript_MSTRG.16896.lgene_id | MSTRG.16896; |
| 15 StringTie exon       | 138221578 | 138221861 | . | - | . | transcript_MSTRG.16896.lgene_id | MSTRG.16896; |
| 15 StringTie transcript | 139552989 | 139557318 | . | - | . | transcript_MSTRG.16930.lgene_id | MSTRG.16930; |
| 15 StringTie exon       | 139552989 | 139553222 | . | - | . | transcript_MSTRG.16930.lgene_id | MSTRG.16930; |
| 15 StringTie exon       | 139557208 | 139557318 | . | - | . | transcript_MSTRG.16930.lgene_id | MSTRG.16930; |
| 15 StringTie transcript | 140165979 | 140172600 | . | - | . | transcript_MSTRG.16950.lgene_id | MSTRG.16950; |
| 15 StringTie exon       | 140165979 | 140166181 | . | - | . | transcript_MSTRG.16950.lgene_id | MSTRG.16950; |
| 15 StringTie exon       | 140170601 | 140170679 | . | - | . | transcript_MSTRG.16950.lgene_id | MSTRG.16950; |
| 15 StringTie exon       | 140170780 | 140170931 | . | - | . | transcript_MSTRG.16950.lgene_id | MSTRG.16950; |
| 15 StringTie exon       | 140172516 | 140172600 | . | - | . | transcript_MSTRG.16950.lgene_id | MSTRG.16950; |
| 16 StringTie transcript | 322182    | 339536    | . | + | . | transcript_MSTRG.16974.lgene_id | MSTRG.16974; |
| 16 StringTie exon       | 322182    | 322445    | . | + | . | transcript_MSTRG.16974.lgene_id | MSTRG.16974; |
| 16 StringTie exon       | 339225    | 339536    | . | + | . | transcript_MSTRG.16974.lgene_id | MSTRG.16974; |
| 16 StringTie transcript | 322182    | 345236    | . | + | . | transcript_MSTRG.16974.lgene_id | MSTRG.16974; |
| 16 StringTie exon       | 322182    | 322379    | . | + | . | transcript_MSTRG.16974.lgene_id | MSTRG.16974; |
| 16 StringTie exon       | 339225    | 339483    | . | + | . | transcript_MSTRG.16974.lgene_id | MSTRG.16974; |
| 16 StringTie exon       | 345150    | 345236    | . | + | . | transcript_MSTRG.16974.lgene_id | MSTRG.16974; |

|                         |          |            |   |   |                                 |              |
|-------------------------|----------|------------|---|---|---------------------------------|--------------|
| 16 StringTie transcript | 322210   | 345407 .   | + | . | transcript_MSTRG.16974.}gene_id | MSTRG.16974; |
| 16 StringTie exon       | 322210   | 322379 .   | + | . | transcript_MSTRG.16974.}gene_id | MSTRG.16974; |
| 16 StringTie exon       | 339225   | 339469 .   | + | . | transcript_MSTRG.16974.}gene_id | MSTRG.16974; |
| 16 StringTie exon       | 345150   | 345407 .   | + | . | transcript_MSTRG.16974.}gene_id | MSTRG.16974; |
| 16 StringTie transcript | 6765575  | 6770482 .  | + | . | transcript_MSTRG.16998.}gene_id | MSTRG.16998; |
| 16 StringTie exon       | 6765575  | 6765801 .  | + | . | transcript_MSTRG.16998.}gene_id | MSTRG.16998; |
| 16 StringTie exon       | 6768129  | 6770482 .  | + | . | transcript_MSTRG.16998.}gene_id | MSTRG.16998; |
| 16 StringTie transcript | 18146807 | 18147086 . | + | . | transcript_MSTRG.17036.}gene_id | MSTRG.17036; |
| 16 StringTie exon       | 18146807 | 18146995 . | + | . | transcript_MSTRG.17036.}gene_id | MSTRG.17036; |
| 16 StringTie exon       | 18147045 | 18147086 . | + | . | transcript_MSTRG.17036.}gene_id | MSTRG.17036; |
| 16 StringTie transcript | 19454145 | 19454932 . | + | . | transcript_MSTRG.17065.}gene_id | MSTRG.17065; |
| 16 StringTie exon       | 19454145 | 19454766 . | + | . | transcript_MSTRG.17065.}gene_id | MSTRG.17065; |
| 16 StringTie exon       | 19454790 | 19454932 . | + | . | transcript_MSTRG.17065.}gene_id | MSTRG.17065; |
| 16 StringTie transcript | 20502233 | 20502772 . | + | . | transcript_MSTRG.17082.}gene_id | MSTRG.17082; |
| 16 StringTie exon       | 20502233 | 20502328 . | + | . | transcript_MSTRG.17082.}gene_id | MSTRG.17082; |
| 16 StringTie exon       | 20502604 | 20502772 . | + | . | transcript_MSTRG.17082.}gene_id | MSTRG.17082; |
| 16 StringTie transcript | 21907643 | 21930231 . | + | . | transcript_MSTRG.17108.}gene_id | MSTRG.17108; |
| 16 StringTie exon       | 21907643 | 21908734 . | + | . | transcript_MSTRG.17108.}gene_id | MSTRG.17108; |
| 16 StringTie exon       | 21930164 | 21930231 . | + | . | transcript_MSTRG.17108.}gene_id | MSTRG.17108; |
| 16 StringTie transcript | 22329010 | 22330930 . | + | . | transcript_MSTRG.17113.}gene_id | MSTRG.17113; |
| 16 StringTie exon       | 22329010 | 22329518 . | + | . | transcript_MSTRG.17113.}gene_id | MSTRG.17113; |
| 16 StringTie exon       | 22330132 | 22330930 . | + | . | transcript_MSTRG.17113.}gene_id | MSTRG.17113; |
| 16 StringTie transcript | 22942993 | 22944310 . | + | . | transcript_MSTRG.17124.}gene_id | MSTRG.17124; |
| 16 StringTie exon       | 22942993 | 22944138 . | + | . | transcript_MSTRG.17124.}gene_id | MSTRG.17124; |
| 16 StringTie exon       | 22944188 | 22944310 . | + | . | transcript_MSTRG.17124.}gene_id | MSTRG.17124; |
| 16 StringTie transcript | 23396431 | 23402509 . | + | . | transcript_MSTRG.17134.}gene_id | MSTRG.17134; |
| 16 StringTie exon       | 23396431 | 23396676 . | + | . | transcript_MSTRG.17134.}gene_id | MSTRG.17134; |
| 16 StringTie exon       | 23402369 | 23402509 . | + | . | transcript_MSTRG.17134.}gene_id | MSTRG.17134; |
| 16 StringTie transcript | 26668887 | 26670462 . | + | . | transcript_MSTRG.17203.}gene_id | MSTRG.17203; |
| 16 StringTie exon       | 26668887 | 26668985 . | + | . | transcript_MSTRG.17203.}gene_id | MSTRG.17203; |
| 16 StringTie exon       | 26669957 | 26670462 . | + | . | transcript_MSTRG.17203.}gene_id | MSTRG.17203; |
| 16 StringTie transcript | 27719061 | 27724818 . | + | . | transcript_MSTRG.17240.}gene_id | MSTRG.17240; |
| 16 StringTie exon       | 27719061 | 27719349 . | + | . | transcript_MSTRG.17240.}gene_id | MSTRG.17240; |
| 16 StringTie exon       | 27719943 | 27720183 . | + | . | transcript_MSTRG.17240.}gene_id | MSTRG.17240; |
| 16 StringTie exon       | 27723739 | 27724818 . | + | . | transcript_MSTRG.17240.}gene_id | MSTRG.17240; |

|                        |          |          |   |   |   |                         |          |              |
|------------------------|----------|----------|---|---|---|-------------------------|----------|--------------|
| 16 StringTie transcrip | 28065926 | 28069320 | . | + | . | transcript_MSTRG.17261. | lgene_id | MSTRG.17261; |
| 16 StringTie exon      | 28065926 | 28066092 | . | + | . | transcript_MSTRG.17261. | lgene_id | MSTRG.17261; |
| 16 StringTie exon      | 28068396 | 28069320 | . | + | . | transcript_MSTRG.17261. | lgene_id | MSTRG.17261; |
| 16 StringTie transcrip | 33292477 | 33294199 | . | + | . | transcript_MSTRG.17337. | lgene_id | MSTRG.17337; |
| 16 StringTie exon      | 33292477 | 33293166 | . | + | . | transcript_MSTRG.17337. | lgene_id | MSTRG.17337; |
| 16 StringTie exon      | 33293798 | 33294199 | . | + | . | transcript_MSTRG.17337. | lgene_id | MSTRG.17337; |
| 16 StringTie transcrip | 47455467 | 47459703 | . | + | . | transcript_MSTRG.17686. | lgene_id | MSTRG.17686; |
| 16 StringTie exon      | 47455467 | 47455885 | . | + | . | transcript_MSTRG.17686. | lgene_id | MSTRG.17686; |
| 16 StringTie exon      | 47459577 | 47459703 | . | + | . | transcript_MSTRG.17686. | lgene_id | MSTRG.17686; |
| 16 StringTie transcrip | 50425063 | 50430343 | . | + | . | transcript_MSTRG.17744. | lgene_id | MSTRG.17744; |
| 16 StringTie exon      | 50425063 | 50425449 | . | + | . | transcript_MSTRG.17744. | lgene_id | MSTRG.17744; |
| 16 StringTie exon      | 50426818 | 50427024 | . | + | . | transcript_MSTRG.17744. | lgene_id | MSTRG.17744; |
| 16 StringTie exon      | 50429078 | 50429298 | . | + | . | transcript_MSTRG.17744. | lgene_id | MSTRG.17744; |
| 16 StringTie exon      | 50429782 | 50430343 | . | + | . | transcript_MSTRG.17744. | lgene_id | MSTRG.17744; |
| 16 StringTie transcrip | 63611176 | 63659621 | . | + | . | transcript_MSTRG.17865. | lgene_id | MSTRG.17865; |
| 16 StringTie exon      | 63611176 | 63611202 | . | + | . | transcript_MSTRG.17865. | lgene_id | MSTRG.17865; |
| 16 StringTie exon      | 63655707 | 63655800 | . | + | . | transcript_MSTRG.17865. | lgene_id | MSTRG.17865; |
| 16 StringTie exon      | 63658469 | 63659621 | . | + | . | transcript_MSTRG.17865. | lgene_id | MSTRG.17865; |
| 16 StringTie transcrip | 63624475 | 63658999 | . | + | . | transcript_MSTRG.17865. | lgene_id | MSTRG.17865; |
| 16 StringTie exon      | 63624475 | 63624575 | . | + | . | transcript_MSTRG.17865. | lgene_id | MSTRG.17865; |
| 16 StringTie exon      | 63655707 | 63655800 | . | + | . | transcript_MSTRG.17865. | lgene_id | MSTRG.17865; |
| 16 StringTie exon      | 63658469 | 63658999 | . | + | . | transcript_MSTRG.17865. | lgene_id | MSTRG.17865; |
| 16 StringTie transcrip | 69021212 | 69024430 | . | + | . | transcript_MSTRG.17941. | lgene_id | MSTRG.17941; |
| 16 StringTie exon      | 69021212 | 69023809 | . | + | . | transcript_MSTRG.17941. | lgene_id | MSTRG.17941; |
| 16 StringTie exon      | 69024116 | 69024430 | . | + | . | transcript_MSTRG.17941. | lgene_id | MSTRG.17941; |
| 16 StringTie transcrip | 71276476 | 71281483 | . | + | . | transcript_MSTRG.17952. | lgene_id | MSTRG.17952; |
| 16 StringTie exon      | 71276476 | 71276851 | . | + | . | transcript_MSTRG.17952. | lgene_id | MSTRG.17952; |
| 16 StringTie exon      | 71281199 | 71281483 | . | + | . | transcript_MSTRG.17952. | lgene_id | MSTRG.17952; |
| 16 StringTie transcrip | 71298464 | 71299113 | . | + | . | transcript_MSTRG.17953. | lgene_id | MSTRG.17953; |
| 16 StringTie exon      | 71298464 | 71298514 | . | + | . | transcript_MSTRG.17953. | lgene_id | MSTRG.17953; |
| 16 StringTie exon      | 71298813 | 71299113 | . | + | . | transcript_MSTRG.17953. | lgene_id | MSTRG.17953; |
| 16 StringTie transcrip | 71589801 | 71593273 | . | + | . | transcript_MSTRG.17956. | lgene_id | MSTRG.17956; |
| 16 StringTie exon      | 71589801 | 71589856 | . | + | . | transcript_MSTRG.17956. | lgene_id | MSTRG.17956; |
| 16 StringTie exon      | 71591609 | 71591757 | . | + | . | transcript_MSTRG.17956. | lgene_id | MSTRG.17956; |
| 16 StringTie exon      | 71592707 | 71592904 | . | + | . | transcript_MSTRG.17956. | lgene_id | MSTRG.17956; |

|                        |          |          |   |   |   |                         |          |              |
|------------------------|----------|----------|---|---|---|-------------------------|----------|--------------|
| 16 StringTie exon      | 71593184 | 71593273 | . | + | . | transcript_MSTRG.17956. | lgene_id | MSTRG.17956; |
| 16 StringTie transcrip | 75289042 | 75312167 | . | + | . | transcript_MSTRG.18010. | lgene_id | MSTRG.18010; |
| 16 StringTie exon      | 75289042 | 75289070 | . | + | . | transcript_MSTRG.18010. | lgene_id | MSTRG.18010; |
| 16 StringTie exon      | 75311512 | 75312167 | . | + | . | transcript_MSTRG.18010. | lgene_id | MSTRG.18010; |
| 16 StringTie transcrip | 5721706  | 5725318  | . | - | . | transcript_MSTRG.16994. | lgene_id | MSTRG.16994; |
| 16 StringTie exon      | 5721706  | 5723493  | . | - | . | transcript_MSTRG.16994. | lgene_id | MSTRG.16994; |
| 16 StringTie exon      | 5724690  | 5725318  | . | - | . | transcript_MSTRG.16994. | lgene_id | MSTRG.16994; |
| 16 StringTie transcrip | 18916096 | 18917448 | . | - | . | transcript_MSTRG.17049. | lgene_id | MSTRG.17049; |
| 16 StringTie exon      | 18916096 | 18917128 | . | - | . | transcript_MSTRG.17049. | lgene_id | MSTRG.17049; |
| 16 StringTie exon      | 18917214 | 18917448 | . | - | . | transcript_MSTRG.17049. | lgene_id | MSTRG.17049; |
| 16 StringTie transcrip | 18916096 | 18980869 | . | - | . | transcript_MSTRG.17049. | lgene_id | MSTRG.17049; |
| 16 StringTie exon      | 18916096 | 18917128 | . | - | . | transcript_MSTRG.17049. | lgene_id | MSTRG.17049; |
| 16 StringTie exon      | 18980790 | 18980869 | . | - | . | transcript_MSTRG.17049. | lgene_id | MSTRG.17049; |
| 16 StringTie transcrip | 21915039 | 21936691 | . | - | . | transcript_MSTRG.17109. | lgene_id | MSTRG.17109; |
| 16 StringTie exon      | 21915039 | 21915711 | . | - | . | transcript_MSTRG.17109. | lgene_id | MSTRG.17109; |
| 16 StringTie exon      | 21936494 | 21936691 | . | - | . | transcript_MSTRG.17109. | lgene_id | MSTRG.17109; |
| 16 StringTie transcrip | 25816400 | 25816766 | . | - | . | transcript_MSTRG.17167. | lgene_id | MSTRG.17167; |
| 16 StringTie exon      | 25816400 | 25816510 | . | - | . | transcript_MSTRG.17167. | lgene_id | MSTRG.17167; |
| 16 StringTie exon      | 25816659 | 25816766 | . | - | . | transcript_MSTRG.17167. | lgene_id | MSTRG.17167; |
| 16 StringTie transcrip | 27375702 | 27422645 | . | - | . | transcript_MSTRG.17228. | lgene_id | MSTRG.17228; |
| 16 StringTie exon      | 27375702 | 27375726 | . | - | . | transcript_MSTRG.17228. | lgene_id | MSTRG.17228; |
| 16 StringTie exon      | 27421472 | 27422645 | . | - | . | transcript_MSTRG.17228. | lgene_id | MSTRG.17228; |
| 16 StringTie transcrip | 33731978 | 33746852 | . | - | . | transcript_MSTRG.17341. | lgene_id | MSTRG.17341; |
| 16 StringTie exon      | 33731978 | 33732136 | . | - | . | transcript_MSTRG.17341. | lgene_id | MSTRG.17341; |
| 16 StringTie exon      | 33744155 | 33744265 | . | - | . | transcript_MSTRG.17341. | lgene_id | MSTRG.17341; |
| 16 StringTie exon      | 33746741 | 33746852 | . | - | . | transcript_MSTRG.17341. | lgene_id | MSTRG.17341; |
| 16 StringTie transcrip | 35169467 | 35211998 | . | - | . | transcript_MSTRG.17405. | lgene_id | MSTRG.17405; |
| 16 StringTie exon      | 35169467 | 35169570 | . | - | . | transcript_MSTRG.17405. | lgene_id | MSTRG.17405; |
| 16 StringTie exon      | 35192088 | 35192220 | . | - | . | transcript_MSTRG.17405. | lgene_id | MSTRG.17405; |
| 16 StringTie exon      | 35211711 | 35211998 | . | - | . | transcript_MSTRG.17405. | lgene_id | MSTRG.17405; |
| 16 StringTie transcrip | 45454422 | 45461119 | . | - | . | transcript_MSTRG.17655. | lgene_id | MSTRG.17655; |
| 16 StringTie exon      | 45454422 | 45459226 | . | - | . | transcript_MSTRG.17655. | lgene_id | MSTRG.17655; |
| 16 StringTie exon      | 45461081 | 45461119 | . | - | . | transcript_MSTRG.17655. | lgene_id | MSTRG.17655; |
| 16 StringTie transcrip | 46680663 | 46682596 | . | - | . | transcript_MSTRG.17642. | lgene_id | MSTRG.17642; |
| 16 StringTie exon      | 46680663 | 46681757 | . | - | . | transcript_MSTRG.17642. | lgene_id | MSTRG.17642; |

|                        |          |          |   |   |   |                                 |              |
|------------------------|----------|----------|---|---|---|---------------------------------|--------------|
| 16 StringTie exon      | 46682502 | 46682596 | . | - | . | transcript_MSTRG.17642.lgene_id | MSTRG.17642; |
| 16 StringTie transcrip | 47255018 | 47284421 | . | - | . | transcript_MSTRG.17667.lgene_id | MSTRG.17667; |
| 16 StringTie exon      | 47255018 | 47255262 | . | - | . | transcript_MSTRG.17667.lgene_id | MSTRG.17667; |
| 16 StringTie exon      | 47284400 | 47284421 | . | - | . | transcript_MSTRG.17667.lgene_id | MSTRG.17667; |
| 16 StringTie transcrip | 50556645 | 50557525 | . | - | . | transcript_MSTRG.17735.lgene_id | MSTRG.17735; |
| 16 StringTie exon      | 50556645 | 50556896 | . | - | . | transcript_MSTRG.17735.lgene_id | MSTRG.17735; |
| 16 StringTie exon      | 50557468 | 50557525 | . | - | . | transcript_MSTRG.17735.lgene_id | MSTRG.17735; |
| 16 StringTie transcrip | 50717517 | 50733805 | . | - | . | transcript_MSTRG.17741.lgene_id | MSTRG.17741; |
| 16 StringTie exon      | 50717517 | 50717622 | . | - | . | transcript_MSTRG.17741.lgene_id | MSTRG.17741; |
| 16 StringTie exon      | 50733651 | 50733805 | . | - | . | transcript_MSTRG.17741.lgene_id | MSTRG.17741; |
| 16 StringTie transcrip | 52133305 | 52135531 | . | - | . | transcript_MSTRG.17781.lgene_id | MSTRG.17781; |
| 16 StringTie exon      | 52133305 | 52133410 | . | - | . | transcript_MSTRG.17781.lgene_id | MSTRG.17781; |
| 16 StringTie exon      | 52134167 | 52134293 | . | - | . | transcript_MSTRG.17781.lgene_id | MSTRG.17781; |
| 16 StringTie exon      | 52135413 | 52135531 | . | - | . | transcript_MSTRG.17781.lgene_id | MSTRG.17781; |
| 16 StringTie transcrip | 52133348 | 52139117 | . | - | . | transcript_MSTRG.17781.lgene_id | MSTRG.17781; |
| 16 StringTie exon      | 52133348 | 52133410 | . | - | . | transcript_MSTRG.17781.lgene_id | MSTRG.17781; |
| 16 StringTie exon      | 52134167 | 52134293 | . | - | . | transcript_MSTRG.17781.lgene_id | MSTRG.17781; |
| 16 StringTie exon      | 52137691 | 52137877 | . | - | . | transcript_MSTRG.17781.lgene_id | MSTRG.17781; |
| 16 StringTie exon      | 52139032 | 52139117 | . | - | . | transcript_MSTRG.17781.lgene_id | MSTRG.17781; |
| 16 StringTie transcrip | 55217647 | 55262714 | . | - | . | transcript_MSTRG.17834.lgene_id | MSTRG.17834; |
| 16 StringTie exon      | 55217647 | 55217757 | . | - | . | transcript_MSTRG.17834.lgene_id | MSTRG.17834; |
| 16 StringTie exon      | 55262288 | 55262714 | . | - | . | transcript_MSTRG.17834.lgene_id | MSTRG.17834; |
| 16 StringTie transcrip | 55217647 | 55262714 | . | - | . | transcript_MSTRG.17834.lgene_id | MSTRG.17834; |
| 16 StringTie exon      | 55217647 | 55217757 | . | - | . | transcript_MSTRG.17834.lgene_id | MSTRG.17834; |
| 16 StringTie exon      | 55245584 | 55245776 | . | - | . | transcript_MSTRG.17834.lgene_id | MSTRG.17834; |
| 16 StringTie exon      | 55262288 | 55262714 | . | - | . | transcript_MSTRG.17834.lgene_id | MSTRG.17834; |
| 16 StringTie transcrip | 55217647 | 55264125 | . | - | . | transcript_MSTRG.17834.lgene_id | MSTRG.17834; |
| 16 StringTie exon      | 55217647 | 55217757 | . | - | . | transcript_MSTRG.17834.lgene_id | MSTRG.17834; |
| 16 StringTie exon      | 55245584 | 55245776 | . | - | . | transcript_MSTRG.17834.lgene_id | MSTRG.17834; |
| 16 StringTie exon      | 55264107 | 55264125 | . | - | . | transcript_MSTRG.17834.lgene_id | MSTRG.17834; |
| 16 StringTie transcrip | 55217647 | 55302063 | . | - | . | transcript_MSTRG.17834.lgene_id | MSTRG.17834; |
| 16 StringTie exon      | 55217647 | 55217757 | . | - | . | transcript_MSTRG.17834.lgene_id | MSTRG.17834; |
| 16 StringTie exon      | 55245584 | 55245776 | . | - | . | transcript_MSTRG.17834.lgene_id | MSTRG.17834; |
| 16 StringTie exon      | 55302036 | 55302063 | . | - | . | transcript_MSTRG.17834.lgene_id | MSTRG.17834; |
| 16 StringTie transcrip | 55246327 | 55262714 | . | - | . | transcript_MSTRG.17834.lgene_id | MSTRG.17834; |



|                         |          |          |   |   |   |                                  |              |
|-------------------------|----------|----------|---|---|---|----------------------------------|--------------|
| 16 StringTie exon       | 55246327 | 55246464 | . | - | . | transcript_MSTRG.17834.1.gene_id | MSTRG.17834; |
| 16 StringTie exon       | 55262288 | 55262714 | . | - | . | transcript_MSTRG.17834.1.gene_id | MSTRG.17834; |
| 16 StringTie transcript | 63134186 | 63176835 | . | - | . | transcript_MSTRG.17851.1.gene_id | MSTRG.17851; |
| 16 StringTie exon       | 63134186 | 63134294 | . | - | . | transcript_MSTRG.17851.1.gene_id | MSTRG.17851; |
| 16 StringTie exon       | 63136631 | 63136698 | . | - | . | transcript_MSTRG.17851.1.gene_id | MSTRG.17851; |
| 16 StringTie exon       | 63175663 | 63176835 | . | - | . | transcript_MSTRG.17851.1.gene_id | MSTRG.17851; |
| 16 StringTie transcript | 64650453 | 64676590 | . | - | . | transcript_MSTRG.17888.1.gene_id | MSTRG.17888; |
| 16 StringTie exon       | 64650453 | 64651325 | . | - | . | transcript_MSTRG.17888.1.gene_id | MSTRG.17888; |
| 16 StringTie exon       | 64674195 | 64676590 | . | - | . | transcript_MSTRG.17888.1.gene_id | MSTRG.17888; |
| 17 StringTie transcript | 11700    | 14463    | . | + | . | transcript_MSTRG.18048.1.gene_id | MSTRG.18048; |
| 17 StringTie exon       | 11700    | 11837    | . | + | . | transcript_MSTRG.18048.1.gene_id | MSTRG.18048; |
| 17 StringTie exon       | 14244    | 14463    | . | + | . | transcript_MSTRG.18048.1.gene_id | MSTRG.18048; |
| 17 StringTie transcript | 5333903  | 5341180  | . | + | . | transcript_MSTRG.18098.1.gene_id | MSTRG.18098; |
| 17 StringTie exon       | 5333903  | 5333924  | . | + | . | transcript_MSTRG.18098.1.gene_id | MSTRG.18098; |
| 17 StringTie exon       | 5340833  | 5341180  | . | + | . | transcript_MSTRG.18098.1.gene_id | MSTRG.18098; |
| 17 StringTie transcript | 5697534  | 5704938  | . | + | . | transcript_MSTRG.18115.1.gene_id | MSTRG.18115; |
| 17 StringTie exon       | 5697534  | 5702537  | . | + | . | transcript_MSTRG.18115.1.gene_id | MSTRG.18115; |
| 17 StringTie exon       | 5702831  | 5704938  | . | + | . | transcript_MSTRG.18115.1.gene_id | MSTRG.18115; |
| 17 StringTie transcript | 10761508 | 10762300 | . | + | . | transcript_MSTRG.18140.1.gene_id | MSTRG.18140; |
| 17 StringTie exon       | 10761508 | 10761664 | . | + | . | transcript_MSTRG.18140.1.gene_id | MSTRG.18140; |
| 17 StringTie exon       | 10762189 | 10762300 | . | + | . | transcript_MSTRG.18140.1.gene_id | MSTRG.18140; |
| 17 StringTie transcript | 10868854 | 10871064 | . | + | . | transcript_MSTRG.18141.1.gene_id | MSTRG.18141; |
| 17 StringTie exon       | 10868854 | 10868954 | . | + | . | transcript_MSTRG.18141.1.gene_id | MSTRG.18141; |
| 17 StringTie exon       | 10869325 | 10869441 | . | + | . | transcript_MSTRG.18141.1.gene_id | MSTRG.18141; |
| 17 StringTie exon       | 10870409 | 10871064 | . | + | . | transcript_MSTRG.18141.1.gene_id | MSTRG.18141; |
| 17 StringTie transcript | 18360130 | 18361462 | . | + | . | transcript_MSTRG.18243.1.gene_id | MSTRG.18243; |
| 17 StringTie exon       | 18360130 | 18360390 | . | + | . | transcript_MSTRG.18243.1.gene_id | MSTRG.18243; |
| 17 StringTie exon       | 18360596 | 18361462 | . | + | . | transcript_MSTRG.18243.1.gene_id | MSTRG.18243; |
| 17 StringTie transcript | 21045768 | 21073161 | . | + | . | transcript_MSTRG.18257.1.gene_id | MSTRG.18257; |
| 17 StringTie exon       | 21045768 | 21045905 | . | + | . | transcript_MSTRG.18257.1.gene_id | MSTRG.18257; |
| 17 StringTie exon       | 21073050 | 21073161 | . | + | . | transcript_MSTRG.18257.1.gene_id | MSTRG.18257; |
| 17 StringTie transcript | 26352954 | 26353501 | . | + | . | transcript_MSTRG.18316.1.gene_id | MSTRG.18316; |
| 17 StringTie exon       | 26352954 | 26353372 | . | + | . | transcript_MSTRG.18316.1.gene_id | MSTRG.18316; |
| 17 StringTie exon       | 26353397 | 26353501 | . | + | . | transcript_MSTRG.18316.1.gene_id | MSTRG.18316; |
| 17 StringTie transcript | 27099733 | 27123696 | . | + | . | transcript_MSTRG.18342.1.gene_id | MSTRG.18342; |

|                         |          |          |   |   |   |                                 |              |
|-------------------------|----------|----------|---|---|---|---------------------------------|--------------|
| 17 StringTie exon       | 27099733 | 27100020 | . | + | . | transcript_MSTRG.18342.}gene_id | MSTRG.18342; |
| 17 StringTie exon       | 27123203 | 27123696 | . | + | . | transcript_MSTRG.18342.}gene_id | MSTRG.18342; |
| 17 StringTie transcript | 27099758 | 27306022 | . | + | . | transcript_MSTRG.18342.}gene_id | MSTRG.18342; |
| 17 StringTie exon       | 27099758 | 27100020 | . | + | . | transcript_MSTRG.18342.}gene_id | MSTRG.18342; |
| 17 StringTie exon       | 27218192 | 27218429 | . | + | . | transcript_MSTRG.18342.}gene_id | MSTRG.18342; |
| 17 StringTie exon       | 27305815 | 27306022 | . | + | . | transcript_MSTRG.18342.}gene_id | MSTRG.18342; |
| 17 StringTie transcript | 34164816 | 34166190 | . | + | . | transcript_MSTRG.18505.}gene_id | MSTRG.18505; |
| 17 StringTie exon       | 34164816 | 34164976 | . | + | . | transcript_MSTRG.18505.}gene_id | MSTRG.18505; |
| 17 StringTie exon       | 34166023 | 34166190 | . | + | . | transcript_MSTRG.18505.}gene_id | MSTRG.18505; |
| 17 StringTie transcript | 40470992 | 40490951 | . | + | . | transcript_MSTRG.18694.}gene_id | MSTRG.18694; |
| 17 StringTie exon       | 40470992 | 40471337 | . | + | . | transcript_MSTRG.18694.}gene_id | MSTRG.18694; |
| 17 StringTie exon       | 40490888 | 40490951 | . | + | . | transcript_MSTRG.18694.}gene_id | MSTRG.18694; |
| 17 StringTie transcript | 43073091 | 43077004 | . | + | . | transcript_MSTRG.18750.}gene_id | MSTRG.18750; |
| 17 StringTie exon       | 43073091 | 43073872 | . | + | . | transcript_MSTRG.18750.}gene_id | MSTRG.18750; |
| 17 StringTie exon       | 43076442 | 43077004 | . | + | . | transcript_MSTRG.18750.}gene_id | MSTRG.18750; |
| 17 StringTie transcript | 46677450 | 46678455 | . | + | . | transcript_MSTRG.18817.}gene_id | MSTRG.18817; |
| 17 StringTie exon       | 46677450 | 46677759 | . | + | . | transcript_MSTRG.18817.}gene_id | MSTRG.18817; |
| 17 StringTie exon       | 46678042 | 46678455 | . | + | . | transcript_MSTRG.18817.}gene_id | MSTRG.18817; |
| 17 StringTie transcript | 51451495 | 51452415 | . | + | . | transcript_MSTRG.18924.}gene_id | MSTRG.18924; |
| 17 StringTie exon       | 51451495 | 51452415 | . | + | . | transcript_MSTRG.18924.}gene_id | MSTRG.18924; |
| 17 StringTie transcript | 51473358 | 51476011 | . | + | . | transcript_MSTRG.18924.}gene_id | MSTRG.18924; |
| 17 StringTie exon       | 51473358 | 51473434 | . | + | . | transcript_MSTRG.18924.}gene_id | MSTRG.18924; |
| 17 StringTie exon       | 51473509 | 51476011 | . | + | . | transcript_MSTRG.18924.}gene_id | MSTRG.18924; |
| 17 StringTie transcript | 51644232 | 51647726 | . | + | . | transcript_MSTRG.18939.}gene_id | MSTRG.18939; |
| 17 StringTie exon       | 51644232 | 51644271 | . | + | . | transcript_MSTRG.18939.}gene_id | MSTRG.18939; |
| 17 StringTie exon       | 51647478 | 51647726 | . | + | . | transcript_MSTRG.18939.}gene_id | MSTRG.18939; |
| 17 StringTie transcript | 51698163 | 51712277 | . | + | . | transcript_MSTRG.18943.}gene_id | MSTRG.18943; |
| 17 StringTie exon       | 51698163 | 51698590 | . | + | . | transcript_MSTRG.18943.}gene_id | MSTRG.18943; |
| 17 StringTie exon       | 51712145 | 51712277 | . | + | . | transcript_MSTRG.18943.}gene_id | MSTRG.18943; |
| 17 StringTie transcript | 57984759 | 57985906 | . | + | . | transcript_MSTRG.18997.}gene_id | MSTRG.18997; |
| 17 StringTie exon       | 57984759 | 57985129 | . | + | . | transcript_MSTRG.18997.}gene_id | MSTRG.18997; |
| 17 StringTie exon       | 57985872 | 57985906 | . | + | . | transcript_MSTRG.18997.}gene_id | MSTRG.18997; |
| 17 StringTie transcript | 61936379 | 61937190 | . | + | . | transcript_MSTRG.19052.}gene_id | MSTRG.19052; |
| 17 StringTie exon       | 61936379 | 61936436 | . | + | . | transcript_MSTRG.19052.}gene_id | MSTRG.19052; |
| 17 StringTie exon       | 61936974 | 61937190 | . | + | . | transcript_MSTRG.19052.}gene_id | MSTRG.19052; |

|                         |          |          |   |   |   |                                 |              |
|-------------------------|----------|----------|---|---|---|---------------------------------|--------------|
| 17 StringTie transcript | 62423739 | 62424100 | . | + | . | transcript_MSTRG.19074.lgene_id | MSTRG.19074; |
| 17 StringTie exon       | 62423739 | 62423819 | . | + | . | transcript_MSTRG.19074.lgene_id | MSTRG.19074; |
| 17 StringTie exon       | 62423846 | 62423948 | . | + | . | transcript_MSTRG.19074.lgene_id | MSTRG.19074; |
| 17 StringTie exon       | 62424000 | 62424100 | . | + | . | transcript_MSTRG.19074.lgene_id | MSTRG.19074; |
| 17 StringTie transcript | 62517874 | 62518942 | . | + | . | transcript_MSTRG.19077.lgene_id | MSTRG.19077; |
| 17 StringTie exon       | 62517874 | 62517969 | . | + | . | transcript_MSTRG.19077.lgene_id | MSTRG.19077; |
| 17 StringTie exon       | 62518832 | 62518942 | . | + | . | transcript_MSTRG.19077.lgene_id | MSTRG.19077; |
| 17 StringTie transcript | 62793419 | 62795100 | . | + | . | transcript_MSTRG.19097.lgene_id | MSTRG.19097; |
| 17 StringTie exon       | 62793419 | 62793519 | . | + | . | transcript_MSTRG.19097.lgene_id | MSTRG.19097; |
| 17 StringTie exon       | 62794814 | 62795100 | . | + | . | transcript_MSTRG.19097.lgene_id | MSTRG.19097; |
| 17 StringTie transcript | 1486367  | 1491859  | . | - | . | transcript_MSTRG.18080.lgene_id | MSTRG.18080; |
| 17 StringTie exon       | 1486367  | 1486552  | . | - | . | transcript_MSTRG.18080.lgene_id | MSTRG.18080; |
| 17 StringTie exon       | 1488844  | 1491859  | . | - | . | transcript_MSTRG.18080.lgene_id | MSTRG.18080; |
| 17 StringTie transcript | 15051967 | 15070278 | . | - | . | transcript_MSTRG.18206.lgene_id | MSTRG.18206; |
| 17 StringTie exon       | 15051967 | 15052085 | . | - | . | transcript_MSTRG.18206.lgene_id | MSTRG.18206; |
| 17 StringTie exon       | 15068055 | 15068120 | . | - | . | transcript_MSTRG.18206.lgene_id | MSTRG.18206; |
| 17 StringTie exon       | 15070185 | 15070278 | . | - | . | transcript_MSTRG.18206.lgene_id | MSTRG.18206; |
| 17 StringTie transcript | 32954227 | 32954973 | . | - | . | transcript_MSTRG.18461.lgene_id | MSTRG.18461; |
| 17 StringTie exon       | 32954227 | 32954282 | . | - | . | transcript_MSTRG.18461.lgene_id | MSTRG.18461; |
| 17 StringTie exon       | 32954693 | 32954973 | . | - | . | transcript_MSTRG.18461.lgene_id | MSTRG.18461; |
| 17 StringTie transcript | 33897285 | 33907472 | . | - | . | transcript_MSTRG.18486.lgene_id | MSTRG.18486; |
| 17 StringTie exon       | 33897285 | 33898353 | . | - | . | transcript_MSTRG.18486.lgene_id | MSTRG.18486; |
| 17 StringTie exon       | 33902944 | 33903265 | . | - | . | transcript_MSTRG.18486.lgene_id | MSTRG.18486; |
| 17 StringTie exon       | 33907032 | 33907472 | . | - | . | transcript_MSTRG.18486.lgene_id | MSTRG.18486; |
| 17 StringTie transcript | 33962968 | 33971796 | . | - | . | transcript_MSTRG.18495.lgene_id | MSTRG.18495; |
| 17 StringTie exon       | 33962968 | 33970654 | . | - | . | transcript_MSTRG.18495.lgene_id | MSTRG.18495; |
| 17 StringTie exon       | 33971659 | 33971796 | . | - | . | transcript_MSTRG.18495.lgene_id | MSTRG.18495; |
| 17 StringTie transcript | 35216410 | 35218138 | . | - | . | transcript_MSTRG.18531.lgene_id | MSTRG.18531; |
| 17 StringTie exon       | 35216410 | 35217230 | . | - | . | transcript_MSTRG.18531.lgene_id | MSTRG.18531; |
| 17 StringTie exon       | 35217518 | 35218138 | . | - | . | transcript_MSTRG.18531.lgene_id | MSTRG.18531; |
| 17 StringTie transcript | 37285558 | 37287055 | . | - | . | transcript_MSTRG.18605.lgene_id | MSTRG.18605; |
| 17 StringTie exon       | 37285558 | 37285668 | . | - | . | transcript_MSTRG.18605.lgene_id | MSTRG.18605; |
| 17 StringTie exon       | 37286387 | 37287055 | . | - | . | transcript_MSTRG.18605.lgene_id | MSTRG.18605; |
| 17 StringTie transcript | 37907527 | 37912089 | . | - | . | transcript_MSTRG.18622.lgene_id | MSTRG.18622; |
| 17 StringTie exon       | 37907527 | 37907622 | . | - | . | transcript_MSTRG.18622.lgene_id | MSTRG.18622; |

|                        |          |          |   |   |   |                                 |              |
|------------------------|----------|----------|---|---|---|---------------------------------|--------------|
| 17 StringTie exon      | 37910977 | 37912089 | . | - | . | transcript_MSTRG.18622.lgene_id | MSTRG.18622; |
| 17 StringTie transcrip | 38517315 | 38632458 | . | - | . | transcript_MSTRG.18633.lgene_id | MSTRG.18633; |
| 17 StringTie exon      | 38517315 | 38518099 | . | - | . | transcript_MSTRG.18633.lgene_id | MSTRG.18633; |
| 17 StringTie exon      | 38518203 | 38518421 | . | - | . | transcript_MSTRG.18633.lgene_id | MSTRG.18633; |
| 17 StringTie exon      | 38525792 | 38525874 | . | - | . | transcript_MSTRG.18633.lgene_id | MSTRG.18633; |
| 17 StringTie exon      | 38596259 | 38596369 | . | - | . | transcript_MSTRG.18633.lgene_id | MSTRG.18633; |
| 17 StringTie exon      | 38632320 | 38632458 | . | - | . | transcript_MSTRG.18633.lgene_id | MSTRG.18633; |
| 17 StringTie transcrip | 45962707 | 45966898 | . | - | . | transcript_MSTRG.18789.lgene_id | MSTRG.18789; |
| 17 StringTie exon      | 45962707 | 45962970 | . | - | . | transcript_MSTRG.18789.lgene_id | MSTRG.18789; |
| 17 StringTie exon      | 45966825 | 45966898 | . | - | . | transcript_MSTRG.18789.lgene_id | MSTRG.18789; |
| 17 StringTie transcrip | 47080562 | 47081260 | . | - | . | transcript_MSTRG.18828.lgene_id | MSTRG.18828; |
| 17 StringTie exon      | 47080562 | 47080794 | . | - | . | transcript_MSTRG.18828.lgene_id | MSTRG.18828; |
| 17 StringTie exon      | 47081211 | 47081260 | . | - | . | transcript_MSTRG.18828.lgene_id | MSTRG.18828; |
| 17 StringTie transcrip | 50574081 | 50578835 | . | - | . | transcript_MSTRG.18867.lgene_id | MSTRG.18867; |
| 17 StringTie exon      | 50574081 | 50574338 | . | - | . | transcript_MSTRG.18867.lgene_id | MSTRG.18867; |
| 17 StringTie exon      | 50575089 | 50575181 | . | - | . | transcript_MSTRG.18867.lgene_id | MSTRG.18867; |
| 17 StringTie exon      | 50578355 | 50578835 | . | - | . | transcript_MSTRG.18867.lgene_id | MSTRG.18867; |
| 17 StringTie transcrip | 51472046 | 51473365 | . | - | . | transcript_MSTRG.18927.lgene_id | MSTRG.18927; |
| 17 StringTie exon      | 51472046 | 51473199 | . | - | . | transcript_MSTRG.18927.lgene_id | MSTRG.18927; |
| 17 StringTie exon      | 51473276 | 51473365 | . | - | . | transcript_MSTRG.18927.lgene_id | MSTRG.18927; |
| 17 StringTie transcrip | 54865781 | 54866298 | . | - | . | transcript_MSTRG.18972.lgene_id | MSTRG.18972; |
| 17 StringTie exon      | 54865781 | 54865941 | . | - | . | transcript_MSTRG.18972.lgene_id | MSTRG.18972; |
| 17 StringTie exon      | 54866164 | 54866298 | . | - | . | transcript_MSTRG.18972.lgene_id | MSTRG.18972; |
| 18 StringTie transcrip | 6155909  | 6156491  | . | + | . | transcript_MSTRG.19197.lgene_id | MSTRG.19197; |
| 18 StringTie exon      | 6155909  | 6156264  | . | + | . | transcript_MSTRG.19197.lgene_id | MSTRG.19197; |
| 18 StringTie exon      | 6156473  | 6156491  | . | + | . | transcript_MSTRG.19197.lgene_id | MSTRG.19197; |
| 18 StringTie transcrip | 13777579 | 13784379 | . | + | . | transcript_MSTRG.19384.lgene_id | MSTRG.19384; |
| 18 StringTie exon      | 13777579 | 13777617 | . | + | . | transcript_MSTRG.19384.lgene_id | MSTRG.19384; |
| 18 StringTie exon      | 13783661 | 13784379 | . | + | . | transcript_MSTRG.19384.lgene_id | MSTRG.19384; |
| 18 StringTie transcrip | 14279634 | 14281980 | . | + | . | transcript_MSTRG.19399.lgene_id | MSTRG.19399; |
| 18 StringTie exon      | 14279634 | 14280898 | . | + | . | transcript_MSTRG.19399.lgene_id | MSTRG.19399; |
| 18 StringTie exon      | 14281183 | 14281980 | . | + | . | transcript_MSTRG.19399.lgene_id | MSTRG.19399; |
| 18 StringTie transcrip | 14785344 | 14786536 | . | + | . | transcript_MSTRG.19400.lgene_id | MSTRG.19400; |
| 18 StringTie exon      | 14785344 | 14785561 | . | + | . | transcript_MSTRG.19400.lgene_id | MSTRG.19400; |
| 18 StringTie exon      | 14786282 | 14786536 | . | + | . | transcript_MSTRG.19400.lgene_id | MSTRG.19400; |

|                        |          |            |   |   |                                 |              |
|------------------------|----------|------------|---|---|---------------------------------|--------------|
| 18 StringTie transcrip | 15131912 | 15140257 . | + | . | transcript_MSTRG.19425.lgene_id | MSTRG.19425; |
| 18 StringTie exon      | 15131912 | 15131991 . | + | . | transcript_MSTRG.19425.lgene_id | MSTRG.19425; |
| 18 StringTie exon      | 15139889 | 15140257 . | + | . | transcript_MSTRG.19425.lgene_id | MSTRG.19425; |
| 18 StringTie transcrip | 17859078 | 17947544 . | + | . | transcript_MSTRG.19467.lgene_id | MSTRG.19467; |
| 18 StringTie exon      | 17859078 | 17859173 . | + | . | transcript_MSTRG.19467.lgene_id | MSTRG.19467; |
| 18 StringTie exon      | 17911857 | 17912006 . | + | . | transcript_MSTRG.19467.lgene_id | MSTRG.19467; |
| 18 StringTie exon      | 17947099 | 17947544 . | + | . | transcript_MSTRG.19467.lgene_id | MSTRG.19467; |
| 18 StringTie transcrip | 17872880 | 17947954 . | + | . | transcript_MSTRG.19467.lgene_id | MSTRG.19467; |
| 18 StringTie exon      | 17872880 | 17872965 . | + | . | transcript_MSTRG.19467.lgene_id | MSTRG.19467; |
| 18 StringTie exon      | 17889683 | 17889795 . | + | . | transcript_MSTRG.19467.lgene_id | MSTRG.19467; |
| 18 StringTie exon      | 17911857 | 17912006 . | + | . | transcript_MSTRG.19467.lgene_id | MSTRG.19467; |
| 18 StringTie exon      | 17947099 | 17947954 . | + | . | transcript_MSTRG.19467.lgene_id | MSTRG.19467; |
| 18 StringTie transcrip | 18029682 | 18032794 . | + | . | transcript_MSTRG.19467.lgene_id | MSTRG.19467; |
| 18 StringTie exon      | 18029682 | 18030833 . | + | . | transcript_MSTRG.19467.lgene_id | MSTRG.19467; |
| 18 StringTie exon      | 18031451 | 18032794 . | + | . | transcript_MSTRG.19467.lgene_id | MSTRG.19467; |
| 18 StringTie transcrip | 18677663 | 18681859 . | + | . | transcript_MSTRG.19490.lgene_id | MSTRG.19490; |
| 18 StringTie exon      | 18677663 | 18677686 . | + | . | transcript_MSTRG.19490.lgene_id | MSTRG.19490; |
| 18 StringTie exon      | 18681287 | 18681859 . | + | . | transcript_MSTRG.19490.lgene_id | MSTRG.19490; |
| 18 StringTie transcrip | 21924956 | 21944322 . | + | . | transcript_MSTRG.19562.lgene_id | MSTRG.19562; |
| 18 StringTie exon      | 21924956 | 21924976 . | + | . | transcript_MSTRG.19562.lgene_id | MSTRG.19562; |
| 18 StringTie exon      | 21931936 | 21932019 . | + | . | transcript_MSTRG.19562.lgene_id | MSTRG.19562; |
| 18 StringTie exon      | 21938845 | 21938926 . | + | . | transcript_MSTRG.19562.lgene_id | MSTRG.19562; |
| 18 StringTie exon      | 21944203 | 21944322 . | + | . | transcript_MSTRG.19562.lgene_id | MSTRG.19562; |
| 18 StringTie transcrip | 21938772 | 22018357 . | + | . | transcript_MSTRG.19562.lgene_id | MSTRG.19562; |
| 18 StringTie exon      | 21938772 | 21938926 . | + | . | transcript_MSTRG.19562.lgene_id | MSTRG.19562; |
| 18 StringTie exon      | 21947846 | 21947905 . | + | . | transcript_MSTRG.19562.lgene_id | MSTRG.19562; |
| 18 StringTie exon      | 22014983 | 22015012 . | + | . | transcript_MSTRG.19562.lgene_id | MSTRG.19562; |
| 18 StringTie exon      | 22016439 | 22016548 . | + | . | transcript_MSTRG.19562.lgene_id | MSTRG.19562; |
| 18 StringTie exon      | 22018241 | 22018357 . | + | . | transcript_MSTRG.19562.lgene_id | MSTRG.19562; |
| 18 StringTie transcrip | 23798285 | 23803301 . | + | . | transcript_MSTRG.19589.lgene_id | MSTRG.19589; |
| 18 StringTie exon      | 23798285 | 23798527 . | + | . | transcript_MSTRG.19589.lgene_id | MSTRG.19589; |
| 18 StringTie exon      | 23798593 | 23803301 . | + | . | transcript_MSTRG.19589.lgene_id | MSTRG.19589; |
| 18 StringTie transcrip | 25644202 | 25669940 . | + | . | transcript_MSTRG.19600.lgene_id | MSTRG.19600; |
| 18 StringTie exon      | 25644202 | 25644226 . | + | . | transcript_MSTRG.19600.lgene_id | MSTRG.19600; |
| 18 StringTie exon      | 25669612 | 25669940 . | + | . | transcript_MSTRG.19600.lgene_id | MSTRG.19600; |

|                         |          |          |   |   |   |                                 |              |
|-------------------------|----------|----------|---|---|---|---------------------------------|--------------|
| 18 StringTie transcript | 32644890 | 32651939 | . | + | . | transcript_MSTRG.19750.lgene_id | MSTRG.19750; |
| 18 StringTie exon       | 32644890 | 32645024 | . | + | . | transcript_MSTRG.19750.lgene_id | MSTRG.19750; |
| 18 StringTie exon       | 32645736 | 32645889 | . | + | . | transcript_MSTRG.19750.lgene_id | MSTRG.19750; |
| 18 StringTie exon       | 32649056 | 32649135 | . | + | . | transcript_MSTRG.19750.lgene_id | MSTRG.19750; |
| 18 StringTie exon       | 32651214 | 32651939 | . | + | . | transcript_MSTRG.19750.lgene_id | MSTRG.19750; |
| 18 StringTie transcript | 33212737 | 33214468 | . | + | . | transcript_MSTRG.19765.lgene_id | MSTRG.19765; |
| 18 StringTie exon       | 33212737 | 33214025 | . | + | . | transcript_MSTRG.19765.lgene_id | MSTRG.19765; |
| 18 StringTie exon       | 33214079 | 33214468 | . | + | . | transcript_MSTRG.19765.lgene_id | MSTRG.19765; |
| 18 StringTie transcript | 39028826 | 39029342 | . | + | . | transcript_MSTRG.19927.lgene_id | MSTRG.19927; |
| 18 StringTie exon       | 39028826 | 39028930 | . | + | . | transcript_MSTRG.19927.lgene_id | MSTRG.19927; |
| 18 StringTie exon       | 39029070 | 39029342 | . | + | . | transcript_MSTRG.19927.lgene_id | MSTRG.19927; |
| 18 StringTie transcript | 39031476 | 39040047 | . | + | . | transcript_MSTRG.19928.lgene_id | MSTRG.19928; |
| 18 StringTie exon       | 39031476 | 39031659 | . | + | . | transcript_MSTRG.19928.lgene_id | MSTRG.19928; |
| 18 StringTie exon       | 39039670 | 39040047 | . | + | . | transcript_MSTRG.19928.lgene_id | MSTRG.19928; |
| 18 StringTie transcript | 39054178 | 39060757 | . | + | . | transcript_MSTRG.19934.lgene_id | MSTRG.19934; |
| 18 StringTie exon       | 39054178 | 39054215 | . | + | . | transcript_MSTRG.19934.lgene_id | MSTRG.19934; |
| 18 StringTie exon       | 39055616 | 39055818 | . | + | . | transcript_MSTRG.19934.lgene_id | MSTRG.19934; |
| 18 StringTie exon       | 39060718 | 39060757 | . | + | . | transcript_MSTRG.19934.lgene_id | MSTRG.19934; |
| 18 StringTie transcript | 39070672 | 39073096 | . | + | . | transcript_MSTRG.19938.lgene_id | MSTRG.19938; |
| 18 StringTie exon       | 39070672 | 39070960 | . | + | . | transcript_MSTRG.19938.lgene_id | MSTRG.19938; |
| 18 StringTie exon       | 39072494 | 39072806 | . | + | . | transcript_MSTRG.19938.lgene_id | MSTRG.19938; |
| 18 StringTie exon       | 39073053 | 39073096 | . | + | . | transcript_MSTRG.19938.lgene_id | MSTRG.19938; |
| 18 StringTie transcript | 39082439 | 39084247 | . | + | . | transcript_MSTRG.19940.lgene_id | MSTRG.19940; |
| 18 StringTie exon       | 39082439 | 39082574 | . | + | . | transcript_MSTRG.19940.lgene_id | MSTRG.19940; |
| 18 StringTie exon       | 39083668 | 39084247 | . | + | . | transcript_MSTRG.19940.lgene_id | MSTRG.19940; |
| 18 StringTie transcript | 41795351 | 41799200 | . | + | . | transcript_MSTRG.19965.lgene_id | MSTRG.19965; |
| 18 StringTie exon       | 41795351 | 41795407 | . | + | . | transcript_MSTRG.19965.lgene_id | MSTRG.19965; |
| 18 StringTie exon       | 41798854 | 41799200 | . | + | . | transcript_MSTRG.19965.lgene_id | MSTRG.19965; |
| 18 StringTie transcript | 42227776 | 42235420 | . | + | . | transcript_MSTRG.19979.lgene_id | MSTRG.19979; |
| 18 StringTie exon       | 42227776 | 42227865 | . | + | . | transcript_MSTRG.19979.lgene_id | MSTRG.19979; |
| 18 StringTie exon       | 42234838 | 42235420 | . | + | . | transcript_MSTRG.19979.lgene_id | MSTRG.19979; |
| 18 StringTie transcript | 42323043 | 42324069 | . | + | . | transcript_MSTRG.19990.lgene_id | MSTRG.19990; |
| 18 StringTie exon       | 42323043 | 42323153 | . | + | . | transcript_MSTRG.19990.lgene_id | MSTRG.19990; |
| 18 StringTie exon       | 42323973 | 42324069 | . | + | . | transcript_MSTRG.19990.lgene_id | MSTRG.19990; |
| 18 StringTie transcript | 42352237 | 42355703 | . | + | . | transcript_MSTRG.19991.lgene_id | MSTRG.19991; |

|                         |          |          |   |   |   |                                 |              |
|-------------------------|----------|----------|---|---|---|---------------------------------|--------------|
| 18 StringTie exon       | 42352237 | 42353399 | . | + | . | transcript_MSTRG.19991.lgene_id | MSTRG.19991; |
| 18 StringTie exon       | 42355518 | 42355703 | . | + | . | transcript_MSTRG.19991.lgene_id | MSTRG.19991; |
| 18 StringTie transcript | 43071690 | 43244511 | . | + | . | transcript_MSTRG.20010.lgene_id | MSTRG.20010; |
| 18 StringTie exon       | 43071690 | 43072319 | . | + | . | transcript_MSTRG.20010.lgene_id | MSTRG.20010; |
| 18 StringTie exon       | 43073096 | 43073239 | . | + | . | transcript_MSTRG.20010.lgene_id | MSTRG.20010; |
| 18 StringTie exon       | 43244453 | 43244511 | . | + | . | transcript_MSTRG.20010.lgene_id | MSTRG.20010; |
| 18 StringTie transcript | 46515648 | 46518229 | . | + | . | transcript_MSTRG.20078.lgene_id | MSTRG.20078; |
| 18 StringTie exon       | 46515648 | 46515855 | . | + | . | transcript_MSTRG.20078.lgene_id | MSTRG.20078; |
| 18 StringTie exon       | 46518153 | 46518229 | . | + | . | transcript_MSTRG.20078.lgene_id | MSTRG.20078; |
| 18 StringTie transcript | 49251182 | 49251940 | . | + | . | transcript_MSTRG.20120.lgene_id | MSTRG.20120; |
| 18 StringTie exon       | 49251182 | 49251221 | . | + | . | transcript_MSTRG.20120.lgene_id | MSTRG.20120; |
| 18 StringTie exon       | 49251582 | 49251940 | . | + | . | transcript_MSTRG.20120.lgene_id | MSTRG.20120; |
| 18 StringTie transcript | 50320447 | 50325416 | . | + | . | transcript_MSTRG.20146.lgene_id | MSTRG.20146; |
| 18 StringTie exon       | 50320447 | 50320497 | . | + | . | transcript_MSTRG.20146.lgene_id | MSTRG.20146; |
| 18 StringTie exon       | 50325217 | 50325416 | . | + | . | transcript_MSTRG.20146.lgene_id | MSTRG.20146; |
| 18 StringTie transcript | 50320447 | 50325437 | . | + | . | transcript_MSTRG.20146.lgene_id | MSTRG.20146; |
| 18 StringTie exon       | 50320447 | 50320566 | . | + | . | transcript_MSTRG.20146.lgene_id | MSTRG.20146; |
| 18 StringTie exon       | 50325286 | 50325437 | . | + | . | transcript_MSTRG.20146.lgene_id | MSTRG.20146; |
| 18 StringTie transcript | 13633005 | 13636017 | . | - | . | transcript_MSTRG.19382.lgene_id | MSTRG.19382; |
| 18 StringTie exon       | 13633005 | 13633226 | . | - | . | transcript_MSTRG.19382.lgene_id | MSTRG.19382; |
| 18 StringTie exon       | 13633509 | 13633602 | . | - | . | transcript_MSTRG.19382.lgene_id | MSTRG.19382; |
| 18 StringTie exon       | 13635933 | 13636017 | . | - | . | transcript_MSTRG.19382.lgene_id | MSTRG.19382; |
| 18 StringTie transcript | 17687165 | 17692425 | . | - | . | transcript_MSTRG.19466.lgene_id | MSTRG.19466; |
| 18 StringTie exon       | 17687165 | 17688699 | . | - | . | transcript_MSTRG.19466.lgene_id | MSTRG.19466; |
| 18 StringTie exon       | 17692399 | 17692425 | . | - | . | transcript_MSTRG.19466.lgene_id | MSTRG.19466; |
| 18 StringTie transcript | 19120667 | 19136439 | . | - | . | transcript_MSTRG.19505.lgene_id | MSTRG.19505; |
| 18 StringTie exon       | 19120667 | 19120746 | . | - | . | transcript_MSTRG.19505.lgene_id | MSTRG.19505; |
| 18 StringTie exon       | 19135906 | 19136439 | . | - | . | transcript_MSTRG.19505.lgene_id | MSTRG.19505; |
| 18 StringTie transcript | 23710348 | 23711465 | . | - | . | transcript_MSTRG.19580.lgene_id | MSTRG.19580; |
| 18 StringTie exon       | 23710348 | 23710629 | . | - | . | transcript_MSTRG.19580.lgene_id | MSTRG.19580; |
| 18 StringTie exon       | 23711435 | 23711465 | . | - | . | transcript_MSTRG.19580.lgene_id | MSTRG.19580; |
| 18 StringTie transcript | 31806970 | 31816996 | . | - | . | transcript_MSTRG.19730.lgene_id | MSTRG.19730; |
| 18 StringTie exon       | 31806970 | 31807173 | . | - | . | transcript_MSTRG.19730.lgene_id | MSTRG.19730; |
| 18 StringTie exon       | 31816946 | 31816996 | . | - | . | transcript_MSTRG.19730.lgene_id | MSTRG.19730; |
| 18 StringTie transcript | 37168498 | 37190394 | . | - | . | transcript_MSTRG.19870.lgene_id | MSTRG.19870; |

|                         |          |          |   |   |   |                                 |              |
|-------------------------|----------|----------|---|---|---|---------------------------------|--------------|
| 18 StringTie exon       | 37168498 | 37168527 | . | - | . | transcript_MSTRG.19870.lgene_id | MSTRG.19870; |
| 18 StringTie exon       | 37189906 | 37190394 | . | - | . | transcript_MSTRG.19870.lgene_id | MSTRG.19870; |
| 18 StringTie transcript | 38199925 | 38284410 | . | - | . | transcript_MSTRG.19901.lgene_id | MSTRG.19901; |
| 18 StringTie exon       | 38199925 | 38201856 | . | - | . | transcript_MSTRG.19901.lgene_id | MSTRG.19901; |
| 18 StringTie exon       | 38254377 | 38254563 | . | - | . | transcript_MSTRG.19901.lgene_id | MSTRG.19901; |
| 18 StringTie exon       | 38282788 | 38282849 | . | - | . | transcript_MSTRG.19901.lgene_id | MSTRG.19901; |
| 18 StringTie exon       | 38284132 | 38284410 | . | - | . | transcript_MSTRG.19901.lgene_id | MSTRG.19901; |
| 18 StringTie transcript | 38200970 | 38225537 | . | - | . | transcript_MSTRG.19901.lgene_id | MSTRG.19901; |
| 18 StringTie exon       | 38200970 | 38201856 | . | - | . | transcript_MSTRG.19901.lgene_id | MSTRG.19901; |
| 18 StringTie exon       | 38225388 | 38225537 | . | - | . | transcript_MSTRG.19901.lgene_id | MSTRG.19901; |
| 18 StringTie transcript | 38237686 | 38284508 | . | - | . | transcript_MSTRG.19901.lgene_id | MSTRG.19901; |
| 18 StringTie exon       | 38237686 | 38237794 | . | - | . | transcript_MSTRG.19901.lgene_id | MSTRG.19901; |
| 18 StringTie exon       | 38254377 | 38254563 | . | - | . | transcript_MSTRG.19901.lgene_id | MSTRG.19901; |
| 18 StringTie exon       | 38282788 | 38282849 | . | - | . | transcript_MSTRG.19901.lgene_id | MSTRG.19901; |
| 18 StringTie exon       | 38284132 | 38284508 | . | - | . | transcript_MSTRG.19901.lgene_id | MSTRG.19901; |
| 18 StringTie transcript | 43666642 | 43728019 | . | - | . | transcript_MSTRG.20020.lgene_id | MSTRG.20020; |
| 18 StringTie exon       | 43666642 | 43667927 | . | - | . | transcript_MSTRG.20020.lgene_id | MSTRG.20020; |
| 18 StringTie exon       | 43669691 | 43669867 | . | - | . | transcript_MSTRG.20020.lgene_id | MSTRG.20020; |
| 18 StringTie exon       | 43674347 | 43674576 | . | - | . | transcript_MSTRG.20020.lgene_id | MSTRG.20020; |
| 18 StringTie exon       | 43727908 | 43728019 | . | - | . | transcript_MSTRG.20020.lgene_id | MSTRG.20020; |
| 18 StringTie transcript | 43667088 | 43728061 | . | - | . | transcript_MSTRG.20020.lgene_id | MSTRG.20020; |
| 18 StringTie exon       | 43667088 | 43667927 | . | - | . | transcript_MSTRG.20020.lgene_id | MSTRG.20020; |
| 18 StringTie exon       | 43674347 | 43674576 | . | - | . | transcript_MSTRG.20020.lgene_id | MSTRG.20020; |
| 18 StringTie exon       | 43727908 | 43728061 | . | - | . | transcript_MSTRG.20020.lgene_id | MSTRG.20020; |
| 18 StringTie transcript | 43667095 | 43727189 | . | - | . | transcript_MSTRG.20020.lgene_id | MSTRG.20020; |
| 18 StringTie exon       | 43667095 | 43667927 | . | - | . | transcript_MSTRG.20020.lgene_id | MSTRG.20020; |
| 18 StringTie exon       | 43669691 | 43669867 | . | - | . | transcript_MSTRG.20020.lgene_id | MSTRG.20020; |
| 18 StringTie exon       | 43674347 | 43674576 | . | - | . | transcript_MSTRG.20020.lgene_id | MSTRG.20020; |
| 18 StringTie exon       | 43691359 | 43691481 | . | - | . | transcript_MSTRG.20020.lgene_id | MSTRG.20020; |
| 18 StringTie exon       | 43727152 | 43727189 | . | - | . | transcript_MSTRG.20020.lgene_id | MSTRG.20020; |
| 18 StringTie transcript | 43667095 | 43728019 | . | - | . | transcript_MSTRG.20020.lgene_id | MSTRG.20020; |
| 18 StringTie exon       | 43667095 | 43667927 | . | - | . | transcript_MSTRG.20020.lgene_id | MSTRG.20020; |
| 18 StringTie exon       | 43674347 | 43674576 | . | - | . | transcript_MSTRG.20020.lgene_id | MSTRG.20020; |
| 18 StringTie exon       | 43691359 | 43691481 | . | - | . | transcript_MSTRG.20020.lgene_id | MSTRG.20020; |
| 18 StringTie exon       | 43727908 | 43728019 | . | - | . | transcript_MSTRG.20020.lgene_id | MSTRG.20020; |



|                         |          |          |   |   |   |                                 |              |
|-------------------------|----------|----------|---|---|---|---------------------------------|--------------|
| 18 StringTie transcript | 43667138 | 43728019 | . | - | . | transcript_MSTRG.20020.†gene_id | MSTRG.20020; |
| 18 StringTie exon       | 43667138 | 43667927 | . | - | . | transcript_MSTRG.20020.†gene_id | MSTRG.20020; |
| 18 StringTie exon       | 43691359 | 43691481 | . | - | . | transcript_MSTRG.20020.†gene_id | MSTRG.20020; |
| 18 StringTie exon       | 43727908 | 43728019 | . | - | . | transcript_MSTRG.20020.†gene_id | MSTRG.20020; |
| 18 StringTie transcript | 43679080 | 43728017 | . | - | . | transcript_MSTRG.20020.†gene_id | MSTRG.20020; |
| 18 StringTie exon       | 43679080 | 43680122 | . | - | . | transcript_MSTRG.20020.†gene_id | MSTRG.20020; |
| 18 StringTie exon       | 43691359 | 43691481 | . | - | . | transcript_MSTRG.20020.†gene_id | MSTRG.20020; |
| 18 StringTie exon       | 43727908 | 43728017 | . | - | . | transcript_MSTRG.20020.†gene_id | MSTRG.20020; |
| 18 StringTie transcript | 43882424 | 43899957 | . | - | . | transcript_MSTRG.20023.†gene_id | MSTRG.20023; |
| 18 StringTie exon       | 43882424 | 43882470 | . | - | . | transcript_MSTRG.20023.†gene_id | MSTRG.20023; |
| 18 StringTie exon       | 43899470 | 43899957 | . | - | . | transcript_MSTRG.20023.†gene_id | MSTRG.20023; |
| 18 StringTie transcript | 46788927 | 46795351 | . | - | . | transcript_MSTRG.20084.†gene_id | MSTRG.20084; |
| 18 StringTie exon       | 46788927 | 46789938 | . | - | . | transcript_MSTRG.20084.†gene_id | MSTRG.20084; |
| 18 StringTie exon       | 46794969 | 46795351 | . | - | . | transcript_MSTRG.20084.†gene_id | MSTRG.20084; |
| 18 StringTie transcript | 48694517 | 48710183 | . | - | . | transcript_MSTRG.20106.†gene_id | MSTRG.20106; |
| 18 StringTie exon       | 48694517 | 48696499 | . | - | . | transcript_MSTRG.20106.†gene_id | MSTRG.20106; |
| 18 StringTie exon       | 48710075 | 48710183 | . | - | . | transcript_MSTRG.20106.†gene_id | MSTRG.20106; |
| 18 StringTie transcript | 48694752 | 48710176 | . | - | . | transcript_MSTRG.20106.†gene_id | MSTRG.20106; |
| 18 StringTie exon       | 48694752 | 48696499 | . | - | . | transcript_MSTRG.20106.†gene_id | MSTRG.20106; |
| 18 StringTie exon       | 48701620 | 48701886 | . | - | . | transcript_MSTRG.20106.†gene_id | MSTRG.20106; |
| 18 StringTie exon       | 48710075 | 48710176 | . | - | . | transcript_MSTRG.20106.†gene_id | MSTRG.20106; |
| 18 StringTie transcript | 48710827 | 48712722 | . | - | . | transcript_MSTRG.20107.†gene_id | MSTRG.20107; |
| 18 StringTie exon       | 48710827 | 48710937 | . | - | . | transcript_MSTRG.20107.†gene_id | MSTRG.20107; |
| 18 StringTie exon       | 48712615 | 48712722 | . | - | . | transcript_MSTRG.20107.†gene_id | MSTRG.20107; |
| 18 StringTie transcript | 48741583 | 48803915 | . | - | . | transcript_MSTRG.20111.†gene_id | MSTRG.20111; |
| 18 StringTie exon       | 48741583 | 48741655 | . | - | . | transcript_MSTRG.20111.†gene_id | MSTRG.20111; |
| 18 StringTie exon       | 48802735 | 48803915 | . | - | . | transcript_MSTRG.20111.†gene_id | MSTRG.20111; |
| 18 StringTie transcript | 48819205 | 48825482 | . | - | . | transcript_MSTRG.20101.†gene_id | MSTRG.20101; |
| 18 StringTie exon       | 48819205 | 48819586 | . | - | . | transcript_MSTRG.20101.†gene_id | MSTRG.20101; |
| 18 StringTie exon       | 48825320 | 48825482 | . | - | . | transcript_MSTRG.20101.†gene_id | MSTRG.20101; |
| 18 StringTie transcript | 48819904 | 48824519 | . | - | . | transcript_MSTRG.20102.†gene_id | MSTRG.20102; |
| 18 StringTie exon       | 48819904 | 48820143 | . | - | . | transcript_MSTRG.20102.†gene_id | MSTRG.20102; |
| 18 StringTie exon       | 48824194 | 48824519 | . | - | . | transcript_MSTRG.20102.†gene_id | MSTRG.20102; |
| 18 StringTie transcript | 50356834 | 50366019 | . | - | . | transcript_MSTRG.20147.†gene_id | MSTRG.20147; |
| 18 StringTie exon       | 50356834 | 50357166 | . | - | . | transcript_MSTRG.20147.†gene_id | MSTRG.20147; |

|                        |          |          |   |   |   |                                 |              |
|------------------------|----------|----------|---|---|---|---------------------------------|--------------|
| 18 StringTie exon      | 50365934 | 50366019 | . | - | . | transcript_MSTRG.20147.lgene_id | MSTRG.20147; |
| 18 StringTie transcrip | 50480853 | 50485285 | . | - | . | transcript_MSTRG.20158.lgene_id | MSTRG.20158; |
| 18 StringTie exon      | 50480853 | 50481275 | . | - | . | transcript_MSTRG.20158.lgene_id | MSTRG.20158; |
| 18 StringTie exon      | 50484926 | 50485285 | . | - | . | transcript_MSTRG.20158.lgene_id | MSTRG.20158; |
| 18 StringTie transcrip | 50481212 | 50485181 | . | - | . | transcript_MSTRG.20158.lgene_id | MSTRG.20158; |
| 18 StringTie exon      | 50481212 | 50481275 | . | - | . | transcript_MSTRG.20158.lgene_id | MSTRG.20158; |
| 18 StringTie exon      | 50484751 | 50484854 | . | - | . | transcript_MSTRG.20158.lgene_id | MSTRG.20158; |
| 18 StringTie exon      | 50484926 | 50485181 | . | - | . | transcript_MSTRG.20158.lgene_id | MSTRG.20158; |
| 2 StringTie transcrip  | 129324   | 135096   | . | + | . | transcript_MSTRG.20264.lgene_id | MSTRG.20264; |
| 2 StringTie exon       | 129324   | 129629   | . | + | . | transcript_MSTRG.20264.lgene_id | MSTRG.20264; |
| 2 StringTie exon       | 134992   | 135096   | . | + | . | transcript_MSTRG.20264.lgene_id | MSTRG.20264; |
| 2 StringTie transcrip  | 540300   | 545389   | . | + | . | transcript_MSTRG.20301.lgene_id | MSTRG.20301; |
| 2 StringTie exon       | 540300   | 540943   | . | + | . | transcript_MSTRG.20301.lgene_id | MSTRG.20301; |
| 2 StringTie exon       | 545198   | 545389   | . | + | . | transcript_MSTRG.20301.lgene_id | MSTRG.20301; |
| 2 StringTie transcrip  | 1480383  | 1486764  | . | + | . | transcript_MSTRG.20317.lgene_id | MSTRG.20317; |
| 2 StringTie exon       | 1480383  | 1480451  | . | + | . | transcript_MSTRG.20317.lgene_id | MSTRG.20317; |
| 2 StringTie exon       | 1485033  | 1485088  | . | + | . | transcript_MSTRG.20317.lgene_id | MSTRG.20317; |
| 2 StringTie exon       | 1485734  | 1486764  | . | + | . | transcript_MSTRG.20317.lgene_id | MSTRG.20317; |
| 2 StringTie transcrip  | 3099313  | 3138365  | . | + | . | transcript_MSTRG.20368.lgene_id | MSTRG.20368; |
| 2 StringTie exon       | 3099313  | 3099708  | . | + | . | transcript_MSTRG.20368.lgene_id | MSTRG.20368; |
| 2 StringTie exon       | 3138293  | 3138365  | . | + | . | transcript_MSTRG.20368.lgene_id | MSTRG.20368; |
| 2 StringTie transcrip  | 4989179  | 4996961  | . | + | . | transcript_MSTRG.20417.lgene_id | MSTRG.20417; |
| 2 StringTie exon       | 4989179  | 4989268  | . | + | . | transcript_MSTRG.20417.lgene_id | MSTRG.20417; |
| 2 StringTie exon       | 4995857  | 4996961  | . | + | . | transcript_MSTRG.20417.lgene_id | MSTRG.20417; |
| 2 StringTie transcrip  | 6166995  | 6172015  | . | + | . | transcript_MSTRG.20469.lgene_id | MSTRG.20469; |
| 2 StringTie exon       | 6166995  | 6167152  | . | + | . | transcript_MSTRG.20469.lgene_id | MSTRG.20469; |
| 2 StringTie exon       | 6171715  | 6172015  | . | + | . | transcript_MSTRG.20469.lgene_id | MSTRG.20469; |
| 2 StringTie transcrip  | 6672014  | 6672430  | . | + | . | transcript_MSTRG.20503.lgene_id | MSTRG.20503; |
| 2 StringTie exon       | 6672014  | 6672124  | . | + | . | transcript_MSTRG.20503.lgene_id | MSTRG.20503; |
| 2 StringTie exon       | 6672245  | 6672430  | . | + | . | transcript_MSTRG.20503.lgene_id | MSTRG.20503; |
| 2 StringTie transcrip  | 6672014  | 6672430  | . | + | . | transcript_MSTRG.20503.lgene_id | MSTRG.20503; |
| 2 StringTie exon       | 6672014  | 6672124  | . | + | . | transcript_MSTRG.20503.lgene_id | MSTRG.20503; |
| 2 StringTie exon       | 6672185  | 6672430  | . | + | . | transcript_MSTRG.20503.lgene_id | MSTRG.20503; |
| 2 StringTie transcrip  | 6750281  | 6757176  | . | + | . | transcript_MSTRG.20512.lgene_id | MSTRG.20512; |
| 2 StringTie exon       | 6750281  | 6750449  | . | + | . | transcript_MSTRG.20512.lgene_id | MSTRG.20512; |

|                       |          |          |   |   |   |                                 |              |
|-----------------------|----------|----------|---|---|---|---------------------------------|--------------|
| 2 StringTie exon      | 6750507  | 6757176  | . | + | . | transcript_MSTRG.20512.¿gene_id | MSTRG.20512; |
| 2 StringTie transcrip | 6750281  | 6757220  | . | + | . | transcript_MSTRG.20512.lgene_id | MSTRG.20512; |
| 2 StringTie exon      | 6750281  | 6757220  | . | + | . | transcript_MSTRG.20512.lgene_id | MSTRG.20512; |
| 2 StringTie transcrip | 9320975  | 9337433  | . | + | . | transcript_MSTRG.20637.lgene_id | MSTRG.20637; |
| 2 StringTie exon      | 9320975  | 9321045  | . | + | . | transcript_MSTRG.20637.lgene_id | MSTRG.20637; |
| 2 StringTie exon      | 9322964  | 9323105  | . | + | . | transcript_MSTRG.20637.lgene_id | MSTRG.20637; |
| 2 StringTie exon      | 9335498  | 9335575  | . | + | . | transcript_MSTRG.20637.lgene_id | MSTRG.20637; |
| 2 StringTie exon      | 9336937  | 9337433  | . | + | . | transcript_MSTRG.20637.lgene_id | MSTRG.20637; |
| 2 StringTie transcrip | 11923790 | 11925690 | . | + | . | transcript_MSTRG.20700.lgene_id | MSTRG.20700; |
| 2 StringTie exon      | 11923790 | 11924006 | . | + | . | transcript_MSTRG.20700.lgene_id | MSTRG.20700; |
| 2 StringTie exon      | 11924115 | 11925690 | . | + | . | transcript_MSTRG.20700.lgene_id | MSTRG.20700; |
| 2 StringTie transcrip | 12279707 | 12286761 | . | + | . | transcript_MSTRG.20710.lgene_id | MSTRG.20710; |
| 2 StringTie exon      | 12279707 | 12280206 | . | + | . | transcript_MSTRG.20710.lgene_id | MSTRG.20710; |
| 2 StringTie exon      | 12285713 | 12286761 | . | + | . | transcript_MSTRG.20710.lgene_id | MSTRG.20710; |
| 2 StringTie transcrip | 12279715 | 12286698 | . | + | . | transcript_MSTRG.20710.¿gene_id | MSTRG.20710; |
| 2 StringTie exon      | 12279715 | 12280206 | . | + | . | transcript_MSTRG.20710.¿gene_id | MSTRG.20710; |
| 2 StringTie exon      | 12281990 | 12282152 | . | + | . | transcript_MSTRG.20710.¿gene_id | MSTRG.20710; |
| 2 StringTie exon      | 12285713 | 12286698 | . | + | . | transcript_MSTRG.20710.¿gene_id | MSTRG.20710; |
| 2 StringTie transcrip | 16313623 | 16315841 | . | + | . | transcript_MSTRG.20819.lgene_id | MSTRG.20819; |
| 2 StringTie exon      | 16313623 | 16313869 | . | + | . | transcript_MSTRG.20819.lgene_id | MSTRG.20819; |
| 2 StringTie exon      | 16315757 | 16315841 | . | + | . | transcript_MSTRG.20819.lgene_id | MSTRG.20819; |
| 2 StringTie transcrip | 16608938 | 16611170 | . | + | . | transcript_MSTRG.20839.lgene_id | MSTRG.20839; |
| 2 StringTie exon      | 16608938 | 16609435 | . | + | . | transcript_MSTRG.20839.lgene_id | MSTRG.20839; |
| 2 StringTie exon      | 16609457 | 16611170 | . | + | . | transcript_MSTRG.20839.lgene_id | MSTRG.20839; |
| 2 StringTie transcrip | 17821540 | 17822075 | . | + | . | transcript_MSTRG.20846.lgene_id | MSTRG.20846; |
| 2 StringTie exon      | 17821540 | 17821708 | . | + | . | transcript_MSTRG.20846.lgene_id | MSTRG.20846; |
| 2 StringTie exon      | 17821854 | 17822075 | . | + | . | transcript_MSTRG.20846.lgene_id | MSTRG.20846; |
| 2 StringTie transcrip | 18266399 | 18267580 | . | + | . | transcript_MSTRG.20868.lgene_id | MSTRG.20868; |
| 2 StringTie exon      | 18266399 | 18266784 | . | + | . | transcript_MSTRG.20868.lgene_id | MSTRG.20868; |
| 2 StringTie exon      | 18267481 | 18267580 | . | + | . | transcript_MSTRG.20868.lgene_id | MSTRG.20868; |
| 2 StringTie transcrip | 24747879 | 24769486 | . | + | . | transcript_MSTRG.20914.¿gene_id | MSTRG.20914; |
| 2 StringTie exon      | 24747879 | 24748841 | . | + | . | transcript_MSTRG.20914.¿gene_id | MSTRG.20914; |
| 2 StringTie exon      | 24768838 | 24769486 | . | + | . | transcript_MSTRG.20914.¿gene_id | MSTRG.20914; |
| 2 StringTie transcrip | 24748167 | 24760578 | . | + | . | transcript_MSTRG.20914.¿gene_id | MSTRG.20914; |
| 2 StringTie exon      | 24748167 | 24748841 | . | + | . | transcript_MSTRG.20914.¿gene_id | MSTRG.20914; |

|                        |          |          |   |   |   |                                  |              |
|------------------------|----------|----------|---|---|---|----------------------------------|--------------|
| 2 StringTie exon       | 24756292 | 24756435 | . | + | . | transcript_MSTRG.20914.1.gene_id | MSTRG.20914; |
| 2 StringTie exon       | 24758311 | 24760578 | . | + | . | transcript_MSTRG.20914.1.gene_id | MSTRG.20914; |
| 2 StringTie transcript | 24764310 | 24767302 | . | + | . | transcript_MSTRG.20915.1.gene_id | MSTRG.20915; |
| 2 StringTie exon       | 24764310 | 24764412 | . | + | . | transcript_MSTRG.20915.1.gene_id | MSTRG.20915; |
| 2 StringTie exon       | 24764975 | 24765150 | . | + | . | transcript_MSTRG.20915.1.gene_id | MSTRG.20915; |
| 2 StringTie exon       | 24766494 | 24767302 | . | + | . | transcript_MSTRG.20915.1.gene_id | MSTRG.20915; |
| 2 StringTie transcript | 26493695 | 26493960 | . | + | . | transcript_MSTRG.20954.1.gene_id | MSTRG.20954; |
| 2 StringTie exon       | 26493695 | 26493805 | . | + | . | transcript_MSTRG.20954.1.gene_id | MSTRG.20954; |
| 2 StringTie exon       | 26493852 | 26493960 | . | + | . | transcript_MSTRG.20954.1.gene_id | MSTRG.20954; |
| 2 StringTie transcript | 46669543 | 46770338 | . | + | . | transcript_MSTRG.21202.1.gene_id | MSTRG.21202; |
| 2 StringTie exon       | 46669543 | 46669760 | . | + | . | transcript_MSTRG.21202.1.gene_id | MSTRG.21202; |
| 2 StringTie exon       | 46673601 | 46673716 | . | + | . | transcript_MSTRG.21202.1.gene_id | MSTRG.21202; |
| 2 StringTie exon       | 46767468 | 46767571 | . | + | . | transcript_MSTRG.21202.1.gene_id | MSTRG.21202; |
| 2 StringTie exon       | 46769546 | 46770338 | . | + | . | transcript_MSTRG.21202.1.gene_id | MSTRG.21202; |
| 2 StringTie transcript | 46669543 | 46770342 | . | + | . | transcript_MSTRG.21202.1.gene_id | MSTRG.21202; |
| 2 StringTie exon       | 46669543 | 46669760 | . | + | . | transcript_MSTRG.21202.1.gene_id | MSTRG.21202; |
| 2 StringTie exon       | 46673601 | 46673716 | . | + | . | transcript_MSTRG.21202.1.gene_id | MSTRG.21202; |
| 2 StringTie exon       | 46714542 | 46714706 | . | + | . | transcript_MSTRG.21202.1.gene_id | MSTRG.21202; |
| 2 StringTie exon       | 46767468 | 46767571 | . | + | . | transcript_MSTRG.21202.1.gene_id | MSTRG.21202; |
| 2 StringTie exon       | 46769546 | 46770342 | . | + | . | transcript_MSTRG.21202.1.gene_id | MSTRG.21202; |
| 2 StringTie transcript | 46672823 | 46770342 | . | + | . | transcript_MSTRG.21202.1.gene_id | MSTRG.21202; |
| 2 StringTie exon       | 46672823 | 46673716 | . | + | . | transcript_MSTRG.21202.1.gene_id | MSTRG.21202; |
| 2 StringTie exon       | 46767471 | 46767571 | . | + | . | transcript_MSTRG.21202.1.gene_id | MSTRG.21202; |
| 2 StringTie exon       | 46769546 | 46770342 | . | + | . | transcript_MSTRG.21202.1.gene_id | MSTRG.21202; |
| 2 StringTie transcript | 46745449 | 46770338 | . | + | . | transcript_MSTRG.21202.1.gene_id | MSTRG.21202; |
| 2 StringTie exon       | 46745449 | 46746591 | . | + | . | transcript_MSTRG.21202.1.gene_id | MSTRG.21202; |
| 2 StringTie exon       | 46767468 | 46767571 | . | + | . | transcript_MSTRG.21202.1.gene_id | MSTRG.21202; |
| 2 StringTie exon       | 46769546 | 46770338 | . | + | . | transcript_MSTRG.21202.1.gene_id | MSTRG.21202; |
| 2 StringTie transcript | 49204850 | 49207540 | . | + | . | transcript_MSTRG.21233.1.gene_id | MSTRG.21233; |
| 2 StringTie exon       | 49204850 | 49204922 | . | + | . | transcript_MSTRG.21233.1.gene_id | MSTRG.21233; |
| 2 StringTie exon       | 49205804 | 49205961 | . | + | . | transcript_MSTRG.21233.1.gene_id | MSTRG.21233; |
| 2 StringTie exon       | 49207103 | 49207540 | . | + | . | transcript_MSTRG.21233.1.gene_id | MSTRG.21233; |
| 2 StringTie transcript | 49204880 | 49207198 | . | + | . | transcript_MSTRG.21233.1.gene_id | MSTRG.21233; |
| 2 StringTie exon       | 49204880 | 49204916 | . | + | . | transcript_MSTRG.21233.1.gene_id | MSTRG.21233; |
| 2 StringTie exon       | 49205804 | 49205961 | . | + | . | transcript_MSTRG.21233.1.gene_id | MSTRG.21233; |

|                       |          |            |   |   |                                 |              |
|-----------------------|----------|------------|---|---|---------------------------------|--------------|
| 2 StringTie exon      | 49207103 | 49207198 . | + | . | transcript_MSTRG.21233.⌋gene_id | MSTRG.21233; |
| 2 StringTie transcrip | 51391906 | 51398450 . | + | . | transcript_MSTRG.21346.⌋gene_id | MSTRG.21346; |
| 2 StringTie exon      | 51391906 | 51391942 . | + | . | transcript_MSTRG.21346.⌋gene_id | MSTRG.21346; |
| 2 StringTie exon      | 51397179 | 51398450 . | + | . | transcript_MSTRG.21346.⌋gene_id | MSTRG.21346; |
| 2 StringTie transcrip | 51420610 | 51424646 . | + | . | transcript_MSTRG.21348.⌋gene_id | MSTRG.21348; |
| 2 StringTie exon      | 51420610 | 51421836 . | + | . | transcript_MSTRG.21348.⌋gene_id | MSTRG.21348; |
| 2 StringTie exon      | 51424283 | 51424646 . | + | . | transcript_MSTRG.21348.⌋gene_id | MSTRG.21348; |
| 2 StringTie transcrip | 59744486 | 59771021 . | + | . | transcript_MSTRG.21406.⌋gene_id | MSTRG.21406; |
| 2 StringTie exon      | 59744486 | 59744680 . | + | . | transcript_MSTRG.21406.⌋gene_id | MSTRG.21406; |
| 2 StringTie exon      | 59751526 | 59751594 . | + | . | transcript_MSTRG.21406.⌋gene_id | MSTRG.21406; |
| 2 StringTie exon      | 59754907 | 59755018 . | + | . | transcript_MSTRG.21406.⌋gene_id | MSTRG.21406; |
| 2 StringTie exon      | 59769965 | 59771021 . | + | . | transcript_MSTRG.21406.⌋gene_id | MSTRG.21406; |
| 2 StringTie transcrip | 60314957 | 60316521 . | + | . | transcript_MSTRG.21432.⌋gene_id | MSTRG.21432; |
| 2 StringTie exon      | 60314957 | 60314981 . | + | . | transcript_MSTRG.21432.⌋gene_id | MSTRG.21432; |
| 2 StringTie exon      | 60315430 | 60316521 . | + | . | transcript_MSTRG.21432.⌋gene_id | MSTRG.21432; |
| 2 StringTie transcrip | 61894131 | 62007405 . | + | . | transcript_MSTRG.21488.⌋gene_id | MSTRG.21488; |
| 2 StringTie exon      | 61894131 | 61894240 . | + | . | transcript_MSTRG.21488.⌋gene_id | MSTRG.21488; |
| 2 StringTie exon      | 62007301 | 62007405 . | + | . | transcript_MSTRG.21488.⌋gene_id | MSTRG.21488; |
| 2 StringTie transcrip | 61938287 | 62007410 . | + | . | transcript_MSTRG.21488.⌋gene_id | MSTRG.21488; |
| 2 StringTie exon      | 61938287 | 61938969 . | + | . | transcript_MSTRG.21488.⌋gene_id | MSTRG.21488; |
| 2 StringTie exon      | 62007301 | 62007410 . | + | . | transcript_MSTRG.21488.⌋gene_id | MSTRG.21488; |
| 2 StringTie transcrip | 61938287 | 62052378 . | + | . | transcript_MSTRG.21488.⌋gene_id | MSTRG.21488; |
| 2 StringTie exon      | 61938287 | 61938969 . | + | . | transcript_MSTRG.21488.⌋gene_id | MSTRG.21488; |
| 2 StringTie exon      | 62052269 | 62052378 . | + | . | transcript_MSTRG.21488.⌋gene_id | MSTRG.21488; |
| 2 StringTie transcrip | 64734068 | 64758062 . | + | . | transcript_MSTRG.21518.⌋gene_id | MSTRG.21518; |
| 2 StringTie exon      | 64734068 | 64734325 . | + | . | transcript_MSTRG.21518.⌋gene_id | MSTRG.21518; |
| 2 StringTie exon      | 64735639 | 64736139 . | + | . | transcript_MSTRG.21518.⌋gene_id | MSTRG.21518; |
| 2 StringTie exon      | 64753575 | 64753661 . | + | . | transcript_MSTRG.21518.⌋gene_id | MSTRG.21518; |
| 2 StringTie exon      | 64756451 | 64758062 . | + | . | transcript_MSTRG.21518.⌋gene_id | MSTRG.21518; |
| 2 StringTie transcrip | 69289557 | 69290636 . | + | . | transcript_MSTRG.21671.⌋gene_id | MSTRG.21671; |
| 2 StringTie exon      | 69289557 | 69289849 . | + | . | transcript_MSTRG.21671.⌋gene_id | MSTRG.21671; |
| 2 StringTie exon      | 69290397 | 69290636 . | + | . | transcript_MSTRG.21671.⌋gene_id | MSTRG.21671; |
| 2 StringTie transcrip | 72704633 | 72741833 . | + | . | transcript_MSTRG.21838.⌋gene_id | MSTRG.21838; |
| 2 StringTie exon      | 72704633 | 72704733 . | + | . | transcript_MSTRG.21838.⌋gene_id | MSTRG.21838; |
| 2 StringTie exon      | 72722395 | 72722515 . | + | . | transcript_MSTRG.21838.⌋gene_id | MSTRG.21838; |

|                       |          |          |   |   |   |                                 |              |
|-----------------------|----------|----------|---|---|---|---------------------------------|--------------|
| 2 StringTie exon      | 72741641 | 72741833 | . | + | . | transcript_MSTRG.21838.lgene_id | MSTRG.21838; |
| 2 StringTie transcrip | 74780665 | 74810457 | . | + | . | transcript_MSTRG.21925.lgene_id | MSTRG.21925; |
| 2 StringTie exon      | 74780665 | 74780816 | . | + | . | transcript_MSTRG.21925.lgene_id | MSTRG.21925; |
| 2 StringTie exon      | 74810368 | 74810457 | . | + | . | transcript_MSTRG.21925.lgene_id | MSTRG.21925; |
| 2 StringTie transcrip | 74780681 | 74824221 | . | + | . | transcript_MSTRG.21925.lgene_id | MSTRG.21925; |
| 2 StringTie exon      | 74780681 | 74780816 | . | + | . | transcript_MSTRG.21925.lgene_id | MSTRG.21925; |
| 2 StringTie exon      | 74812588 | 74812674 | . | + | . | transcript_MSTRG.21925.lgene_id | MSTRG.21925; |
| 2 StringTie exon      | 74819022 | 74819252 | . | + | . | transcript_MSTRG.21925.lgene_id | MSTRG.21925; |
| 2 StringTie exon      | 74823460 | 74824221 | . | + | . | transcript_MSTRG.21925.lgene_id | MSTRG.21925; |
| 2 StringTie transcrip | 74787937 | 74824163 | . | + | . | transcript_MSTRG.21925.lgene_id | MSTRG.21925; |
| 2 StringTie exon      | 74787937 | 74788103 | . | + | . | transcript_MSTRG.21925.lgene_id | MSTRG.21925; |
| 2 StringTie exon      | 74788293 | 74788461 | . | + | . | transcript_MSTRG.21925.lgene_id | MSTRG.21925; |
| 2 StringTie exon      | 74812588 | 74812674 | . | + | . | transcript_MSTRG.21925.lgene_id | MSTRG.21925; |
| 2 StringTie exon      | 74819022 | 74819252 | . | + | . | transcript_MSTRG.21925.lgene_id | MSTRG.21925; |
| 2 StringTie exon      | 74823460 | 74824163 | . | + | . | transcript_MSTRG.21925.lgene_id | MSTRG.21925; |
| 2 StringTie transcrip | 76615906 | 76616405 | . | + | . | transcript_MSTRG.21997.lgene_id | MSTRG.21997; |
| 2 StringTie exon      | 76615906 | 76616016 | . | + | . | transcript_MSTRG.21997.lgene_id | MSTRG.21997; |
| 2 StringTie exon      | 76616299 | 76616405 | . | + | . | transcript_MSTRG.21997.lgene_id | MSTRG.21997; |
| 2 StringTie transcrip | 77005427 | 77021250 | . | + | . | transcript_MSTRG.22018.lgene_id | MSTRG.22018; |
| 2 StringTie exon      | 77005427 | 77005459 | . | + | . | transcript_MSTRG.22018.lgene_id | MSTRG.22018; |
| 2 StringTie exon      | 77014673 | 77014797 | . | + | . | transcript_MSTRG.22018.lgene_id | MSTRG.22018; |
| 2 StringTie exon      | 77015957 | 77016142 | . | + | . | transcript_MSTRG.22018.lgene_id | MSTRG.22018; |
| 2 StringTie exon      | 77019276 | 77021250 | . | + | . | transcript_MSTRG.22018.lgene_id | MSTRG.22018; |
| 2 StringTie transcrip | 77012789 | 77021038 | . | + | . | transcript_MSTRG.22018.lgene_id | MSTRG.22018; |
| 2 StringTie exon      | 77012789 | 77014797 | . | + | . | transcript_MSTRG.22018.lgene_id | MSTRG.22018; |
| 2 StringTie exon      | 77015957 | 77016142 | . | + | . | transcript_MSTRG.22018.lgene_id | MSTRG.22018; |
| 2 StringTie exon      | 77018957 | 77021038 | . | + | . | transcript_MSTRG.22018.lgene_id | MSTRG.22018; |
| 2 StringTie transcrip | 77018911 | 77021045 | . | + | . | transcript_MSTRG.22018.lgene_id | MSTRG.22018; |
| 2 StringTie exon      | 77018911 | 77019046 | . | + | . | transcript_MSTRG.22018.lgene_id | MSTRG.22018; |
| 2 StringTie exon      | 77019276 | 77021045 | . | + | . | transcript_MSTRG.22018.lgene_id | MSTRG.22018; |
| 2 StringTie transcrip | 80265840 | 80297933 | . | + | . | transcript_MSTRG.22154.lgene_id | MSTRG.22154; |
| 2 StringTie exon      | 80265840 | 80266026 | . | + | . | transcript_MSTRG.22154.lgene_id | MSTRG.22154; |
| 2 StringTie exon      | 80281888 | 80281992 | . | + | . | transcript_MSTRG.22154.lgene_id | MSTRG.22154; |
| 2 StringTie exon      | 80286589 | 80286720 | . | + | . | transcript_MSTRG.22154.lgene_id | MSTRG.22154; |
| 2 StringTie exon      | 80297290 | 80297933 | . | + | . | transcript_MSTRG.22154.lgene_id | MSTRG.22154; |

|                       |           |           |   |   |   |                                 |              |
|-----------------------|-----------|-----------|---|---|---|---------------------------------|--------------|
| 2 StringTie transcrip | 95793109  | 95794071  | . | + | . | transcript_MSTRG.22452.lgene_id | MSTRG.22452; |
| 2 StringTie exon      | 95793109  | 95793314  | . | + | . | transcript_MSTRG.22452.lgene_id | MSTRG.22452; |
| 2 StringTie exon      | 95793425  | 95793536  | . | + | . | transcript_MSTRG.22452.lgene_id | MSTRG.22452; |
| 2 StringTie exon      | 95793980  | 95794071  | . | + | . | transcript_MSTRG.22452.lgene_id | MSTRG.22452; |
| 2 StringTie transcrip | 96203037  | 96210876  | . | + | . | transcript_MSTRG.22467.lgene_id | MSTRG.22467; |
| 2 StringTie exon      | 96203037  | 96205845  | . | + | . | transcript_MSTRG.22467.lgene_id | MSTRG.22467; |
| 2 StringTie exon      | 96206326  | 96210876  | . | + | . | transcript_MSTRG.22467.lgene_id | MSTRG.22467; |
| 2 StringTie transcrip | 100959689 | 100981432 | . | + | . | transcript_MSTRG.22508.lgene_id | MSTRG.22508; |
| 2 StringTie exon      | 100959689 | 100959738 | . | + | . | transcript_MSTRG.22508.lgene_id | MSTRG.22508; |
| 2 StringTie exon      | 100981219 | 100981432 | . | + | . | transcript_MSTRG.22508.lgene_id | MSTRG.22508; |
| 2 StringTie transcrip | 117056799 | 117090706 | . | + | . | transcript_MSTRG.22758.lgene_id | MSTRG.22758; |
| 2 StringTie exon      | 117056799 | 117056884 | . | + | . | transcript_MSTRG.22758.lgene_id | MSTRG.22758; |
| 2 StringTie exon      | 117074046 | 117074154 | . | + | . | transcript_MSTRG.22758.lgene_id | MSTRG.22758; |
| 2 StringTie exon      | 117090419 | 117090706 | . | + | . | transcript_MSTRG.22758.lgene_id | MSTRG.22758; |
| 2 StringTie transcrip | 117056799 | 117090706 | . | + | . | transcript_MSTRG.22758.lgene_id | MSTRG.22758; |
| 2 StringTie exon      | 117056799 | 117056884 | . | + | . | transcript_MSTRG.22758.lgene_id | MSTRG.22758; |
| 2 StringTie exon      | 117074050 | 117074154 | . | + | . | transcript_MSTRG.22758.lgene_id | MSTRG.22758; |
| 2 StringTie exon      | 117090419 | 117090706 | . | + | . | transcript_MSTRG.22758.lgene_id | MSTRG.22758; |
| 2 StringTie transcrip | 129913717 | 129952978 | . | + | . | transcript_MSTRG.22920.lgene_id | MSTRG.22920; |
| 2 StringTie exon      | 129913717 | 129913741 | . | + | . | transcript_MSTRG.22920.lgene_id | MSTRG.22920; |
| 2 StringTie exon      | 129952256 | 129952978 | . | + | . | transcript_MSTRG.22920.lgene_id | MSTRG.22920; |
| 2 StringTie transcrip | 130521216 | 130529527 | . | + | . | transcript_MSTRG.22904.lgene_id | MSTRG.22904; |
| 2 StringTie exon      | 130521216 | 130521404 | . | + | . | transcript_MSTRG.22904.lgene_id | MSTRG.22904; |
| 2 StringTie exon      | 130528929 | 130529527 | . | + | . | transcript_MSTRG.22904.lgene_id | MSTRG.22904; |
| 2 StringTie transcrip | 131845760 | 131848399 | . | + | . | transcript_MSTRG.22973.lgene_id | MSTRG.22973; |
| 2 StringTie exon      | 131845760 | 131846206 | . | + | . | transcript_MSTRG.22973.lgene_id | MSTRG.22973; |
| 2 StringTie exon      | 131847629 | 131848399 | . | + | . | transcript_MSTRG.22973.lgene_id | MSTRG.22973; |
| 2 StringTie transcrip | 132112523 | 132144162 | . | + | . | transcript_MSTRG.22978.lgene_id | MSTRG.22978; |
| 2 StringTie exon      | 132112523 | 132112582 | . | + | . | transcript_MSTRG.22978.lgene_id | MSTRG.22978; |
| 2 StringTie exon      | 132125958 | 132126089 | . | + | . | transcript_MSTRG.22978.lgene_id | MSTRG.22978; |
| 2 StringTie exon      | 132144039 | 132144162 | . | + | . | transcript_MSTRG.22978.lgene_id | MSTRG.22978; |
| 2 StringTie transcrip | 140504635 | 140508576 | . | + | . | transcript_MSTRG.23135.lgene_id | MSTRG.23135; |
| 2 StringTie exon      | 140504635 | 140505247 | . | + | . | transcript_MSTRG.23135.lgene_id | MSTRG.23135; |
| 2 StringTie exon      | 140508476 | 140508576 | . | + | . | transcript_MSTRG.23135.lgene_id | MSTRG.23135; |
| 2 StringTie transcrip | 141380167 | 141395787 | . | + | . | transcript_MSTRG.23161.lgene_id | MSTRG.23161; |

|                        |           |           |   |   |   |                                 |              |
|------------------------|-----------|-----------|---|---|---|---------------------------------|--------------|
| 2 StringTie exon       | 141380167 | 141380453 | . | + | . | transcript_MSTRG.23161.lgene_id | MSTRG.23161; |
| 2 StringTie exon       | 141380562 | 141380648 | . | + | . | transcript_MSTRG.23161.lgene_id | MSTRG.23161; |
| 2 StringTie exon       | 141392285 | 141392428 | . | + | . | transcript_MSTRG.23161.lgene_id | MSTRG.23161; |
| 2 StringTie exon       | 141393580 | 141393718 | . | + | . | transcript_MSTRG.23161.lgene_id | MSTRG.23161; |
| 2 StringTie exon       | 141395566 | 141395787 | . | + | . | transcript_MSTRG.23161.lgene_id | MSTRG.23161; |
| 2 StringTie transcript | 143225259 | 143225546 | . | + | . | transcript_MSTRG.23250.lgene_id | MSTRG.23250; |
| 2 StringTie exon       | 143225259 | 143225399 | . | + | . | transcript_MSTRG.23250.lgene_id | MSTRG.23250; |
| 2 StringTie exon       | 143225436 | 143225546 | . | + | . | transcript_MSTRG.23250.lgene_id | MSTRG.23250; |
| 2 StringTie transcript | 149052598 | 149069142 | . | + | . | transcript_MSTRG.23363.lgene_id | MSTRG.23363; |
| 2 StringTie exon       | 149052598 | 149052683 | . | + | . | transcript_MSTRG.23363.lgene_id | MSTRG.23363; |
| 2 StringTie exon       | 149053151 | 149053233 | . | + | . | transcript_MSTRG.23363.lgene_id | MSTRG.23363; |
| 2 StringTie exon       | 149061133 | 149061498 | . | + | . | transcript_MSTRG.23363.lgene_id | MSTRG.23363; |
| 2 StringTie exon       | 149065822 | 149065928 | . | + | . | transcript_MSTRG.23363.lgene_id | MSTRG.23363; |
| 2 StringTie exon       | 149068625 | 149069142 | . | + | . | transcript_MSTRG.23363.lgene_id | MSTRG.23363; |
| 2 StringTie transcript | 151402387 | 151402761 | . | + | . | transcript_MSTRG.23445.lgene_id | MSTRG.23445; |
| 2 StringTie exon       | 151402387 | 151402497 | . | + | . | transcript_MSTRG.23445.lgene_id | MSTRG.23445; |
| 2 StringTie exon       | 151402651 | 151402761 | . | + | . | transcript_MSTRG.23445.lgene_id | MSTRG.23445; |
| 2 StringTie transcript | 354841    | 359216    | . | - | . | transcript_MSTRG.20274.lgene_id | MSTRG.20274; |
| 2 StringTie exon       | 354841    | 355059    | . | - | . | transcript_MSTRG.20274.lgene_id | MSTRG.20274; |
| 2 StringTie exon       | 357502    | 359216    | . | - | . | transcript_MSTRG.20274.lgene_id | MSTRG.20274; |
| 2 StringTie transcript | 470512    | 471750    | . | - | . | transcript_MSTRG.20279.lgene_id | MSTRG.20279; |
| 2 StringTie exon       | 470512    | 470622    | . | - | . | transcript_MSTRG.20279.lgene_id | MSTRG.20279; |
| 2 StringTie exon       | 471021    | 471750    | . | - | . | transcript_MSTRG.20279.lgene_id | MSTRG.20279; |
| 2 StringTie transcript | 1661787   | 1666743   | . | - | . | transcript_MSTRG.20323.lgene_id | MSTRG.20323; |
| 2 StringTie exon       | 1661787   | 1661858   | . | - | . | transcript_MSTRG.20323.lgene_id | MSTRG.20323; |
| 2 StringTie exon       | 1666472   | 1666743   | . | - | . | transcript_MSTRG.20323.lgene_id | MSTRG.20323; |
| 2 StringTie transcript | 2375366   | 2376489   | . | - | . | transcript_MSTRG.20355.lgene_id | MSTRG.20355; |
| 2 StringTie exon       | 2375366   | 2375456   | . | - | . | transcript_MSTRG.20355.lgene_id | MSTRG.20355; |
| 2 StringTie exon       | 2376295   | 2376489   | . | - | . | transcript_MSTRG.20355.lgene_id | MSTRG.20355; |
| 2 StringTie transcript | 4672578   | 4681905   | . | - | . | transcript_MSTRG.20381.lgene_id | MSTRG.20381; |
| 2 StringTie exon       | 4672578   | 4673941   | . | - | . | transcript_MSTRG.20381.lgene_id | MSTRG.20381; |
| 2 StringTie exon       | 4681607   | 4681905   | . | - | . | transcript_MSTRG.20381.lgene_id | MSTRG.20381; |
| 2 StringTie transcript | 4904328   | 4905175   | . | - | . | transcript_MSTRG.20405.lgene_id | MSTRG.20405; |
| 2 StringTie exon       | 4904328   | 4904520   | . | - | . | transcript_MSTRG.20405.lgene_id | MSTRG.20405; |
| 2 StringTie exon       | 4904800   | 4904966   | . | - | . | transcript_MSTRG.20405.lgene_id | MSTRG.20405; |



|                       |         |           |     |                                 |              |
|-----------------------|---------|-----------|-----|---------------------------------|--------------|
| 2 StringTie exon      | 4905142 | 4905175 . | - . | transcript_MSTRG.20405.lgene_id | MSTRG.20405; |
| 2 StringTie transcrip | 4908723 | 4909015 . | - . | transcript_MSTRG.20406.lgene_id | MSTRG.20406; |
| 2 StringTie exon      | 4908723 | 4908830 . | - . | transcript_MSTRG.20406.lgene_id | MSTRG.20406; |
| 2 StringTie exon      | 4908921 | 4909015 . | - . | transcript_MSTRG.20406.lgene_id | MSTRG.20406; |
| 2 StringTie transcrip | 4909126 | 4917248 . | - . | transcript_MSTRG.20407.lgene_id | MSTRG.20407; |
| 2 StringTie exon      | 4909126 | 4909211 . | - . | transcript_MSTRG.20407.lgene_id | MSTRG.20407; |
| 2 StringTie exon      | 4909359 | 4909468 . | - . | transcript_MSTRG.20407.lgene_id | MSTRG.20407; |
| 2 StringTie exon      | 4909721 | 4909806 . | - . | transcript_MSTRG.20407.lgene_id | MSTRG.20407; |
| 2 StringTie exon      | 4915182 | 4915275 . | - . | transcript_MSTRG.20407.lgene_id | MSTRG.20407; |
| 2 StringTie exon      | 4916811 | 4917248 . | - . | transcript_MSTRG.20407.lgene_id | MSTRG.20407; |
| 2 StringTie transcrip | 4930260 | 4935063 . | - . | transcript_MSTRG.20410.lgene_id | MSTRG.20410; |
| 2 StringTie exon      | 4930260 | 4931530 . | - . | transcript_MSTRG.20410.lgene_id | MSTRG.20410; |
| 2 StringTie exon      | 4932634 | 4932821 . | - . | transcript_MSTRG.20410.lgene_id | MSTRG.20410; |
| 2 StringTie exon      | 4935009 | 4935063 . | - . | transcript_MSTRG.20410.lgene_id | MSTRG.20410; |
| 2 StringTie transcrip | 4930269 | 4935059 . | - . | transcript_MSTRG.20410.lgene_id | MSTRG.20410; |
| 2 StringTie exon      | 4930269 | 4931838 . | - . | transcript_MSTRG.20410.lgene_id | MSTRG.20410; |
| 2 StringTie exon      | 4932265 | 4932330 . | - . | transcript_MSTRG.20410.lgene_id | MSTRG.20410; |
| 2 StringTie exon      | 4932634 | 4932821 . | - . | transcript_MSTRG.20410.lgene_id | MSTRG.20410; |
| 2 StringTie exon      | 4935009 | 4935059 . | - . | transcript_MSTRG.20410.lgene_id | MSTRG.20410; |
| 2 StringTie transcrip | 5266053 | 5266511 . | - . | transcript_MSTRG.20440.lgene_id | MSTRG.20440; |
| 2 StringTie exon      | 5266053 | 5266270 . | - . | transcript_MSTRG.20440.lgene_id | MSTRG.20440; |
| 2 StringTie exon      | 5266455 | 5266511 . | - . | transcript_MSTRG.20440.lgene_id | MSTRG.20440; |
| 2 StringTie transcrip | 6750308 | 6757154 . | - . | transcript_MSTRG.20511.lgene_id | MSTRG.20511; |
| 2 StringTie exon      | 6750308 | 6755700 . | - . | transcript_MSTRG.20511.lgene_id | MSTRG.20511; |
| 2 StringTie exon      | 6755785 | 6757154 . | - . | transcript_MSTRG.20511.lgene_id | MSTRG.20511; |
| 2 StringTie transcrip | 6793275 | 6805625 . | - . | transcript_MSTRG.20518.lgene_id | MSTRG.20518; |
| 2 StringTie exon      | 6793275 | 6793489 . | - . | transcript_MSTRG.20518.lgene_id | MSTRG.20518; |
| 2 StringTie exon      | 6793920 | 6805625 . | - . | transcript_MSTRG.20518.lgene_id | MSTRG.20518; |
| 2 StringTie transcrip | 6796875 | 6800604 . | - . | transcript_MSTRG.20518.lgene_id | MSTRG.20518; |
| 2 StringTie exon      | 6796875 | 6798599 . | - . | transcript_MSTRG.20518.lgene_id | MSTRG.20518; |
| 2 StringTie exon      | 6799718 | 6800604 . | - . | transcript_MSTRG.20518.lgene_id | MSTRG.20518; |
| 2 StringTie transcrip | 6802100 | 6803511 . | - . | transcript_MSTRG.20518.lgene_id | MSTRG.20518; |
| 2 StringTie exon      | 6802100 | 6802337 . | - . | transcript_MSTRG.20518.lgene_id | MSTRG.20518; |
| 2 StringTie exon      | 6802441 | 6803511 . | - . | transcript_MSTRG.20518.lgene_id | MSTRG.20518; |
| 2 StringTie transcrip | 7385478 | 7391060 . | - . | transcript_MSTRG.20559.lgene_id | MSTRG.20559; |

|                       |         |           |     |                                 |              |
|-----------------------|---------|-----------|-----|---------------------------------|--------------|
| 2 StringTie exon      | 7385478 | 7386331 . | - . | transcript_MSTRG.20559.lgene_id | MSTRG.20559; |
| 2 StringTie exon      | 7390623 | 7391060 . | - . | transcript_MSTRG.20559.lgene_id | MSTRG.20559; |
| 2 StringTie transcrip | 7420845 | 7421114 . | - . | transcript_MSTRG.20562.lgene_id | MSTRG.20562; |
| 2 StringTie exon      | 7420845 | 7420955 . | - . | transcript_MSTRG.20562.lgene_id | MSTRG.20562; |
| 2 StringTie exon      | 7421004 | 7421114 . | - . | transcript_MSTRG.20562.lgene_id | MSTRG.20562; |
| 2 StringTie transcrip | 8449011 | 8450754 . | - . | transcript_MSTRG.20610.lgene_id | MSTRG.20610; |
| 2 StringTie exon      | 8449011 | 8449120 . | - . | transcript_MSTRG.20610.lgene_id | MSTRG.20610; |
| 2 StringTie exon      | 8450413 | 8450754 . | - . | transcript_MSTRG.20610.lgene_id | MSTRG.20610; |
| 2 StringTie transcrip | 9066937 | 9070793 . | - . | transcript_MSTRG.20625.lgene_id | MSTRG.20625; |
| 2 StringTie exon      | 9066937 | 9067706 . | - . | transcript_MSTRG.20625.lgene_id | MSTRG.20625; |
| 2 StringTie exon      | 9067976 | 9068042 . | - . | transcript_MSTRG.20625.lgene_id | MSTRG.20625; |
| 2 StringTie exon      | 9069174 | 9070793 . | - . | transcript_MSTRG.20625.lgene_id | MSTRG.20625; |
| 2 StringTie transcrip | 9066937 | 9070947 . | - . | transcript_MSTRG.20625.lgene_id | MSTRG.20625; |
| 2 StringTie exon      | 9066937 | 9067706 . | - . | transcript_MSTRG.20625.lgene_id | MSTRG.20625; |
| 2 StringTie exon      | 9067976 | 9068129 . | - . | transcript_MSTRG.20625.lgene_id | MSTRG.20625; |
| 2 StringTie exon      | 9069261 | 9070947 . | - . | transcript_MSTRG.20625.lgene_id | MSTRG.20625; |
| 2 StringTie transcrip | 9067891 | 9070947 . | - . | transcript_MSTRG.20625.lgene_id | MSTRG.20625; |
| 2 StringTie exon      | 9067891 | 9068465 . | - . | transcript_MSTRG.20625.lgene_id | MSTRG.20625; |
| 2 StringTie exon      | 9069597 | 9070947 . | - . | transcript_MSTRG.20625.lgene_id | MSTRG.20625; |
| 2 StringTie transcrip | 9067976 | 9070947 . | - . | transcript_MSTRG.20625.lgene_id | MSTRG.20625; |
| 2 StringTie exon      | 9067976 | 9068700 . | - . | transcript_MSTRG.20625.lgene_id | MSTRG.20625; |
| 2 StringTie exon      | 9069833 | 9070947 . | - . | transcript_MSTRG.20625.lgene_id | MSTRG.20625; |
| 2 StringTie transcrip | 9068566 | 9070654 . | - . | transcript_MSTRG.20625.lgene_id | MSTRG.20625; |
| 2 StringTie exon      | 9068566 | 9069054 . | - . | transcript_MSTRG.20625.lgene_id | MSTRG.20625; |
| 2 StringTie exon      | 9070187 | 9070654 . | - . | transcript_MSTRG.20625.lgene_id | MSTRG.20625; |
| 2 StringTie transcrip | 9200819 | 9202192 . | - . | transcript_MSTRG.20764.lgene_id | MSTRG.20764; |
| 2 StringTie exon      | 9200819 | 9200929 . | - . | transcript_MSTRG.20764.lgene_id | MSTRG.20764; |
| 2 StringTie exon      | 9202082 | 9202192 . | - . | transcript_MSTRG.20764.lgene_id | MSTRG.20764; |
| 2 StringTie transcrip | 9200819 | 9202896 . | - . | transcript_MSTRG.20764.lgene_id | MSTRG.20764; |
| 2 StringTie exon      | 9200819 | 9200929 . | - . | transcript_MSTRG.20764.lgene_id | MSTRG.20764; |
| 2 StringTie exon      | 9202688 | 9202896 . | - . | transcript_MSTRG.20764.lgene_id | MSTRG.20764; |
| 2 StringTie transcrip | 9202577 | 9204449 . | - . | transcript_MSTRG.20764.lgene_id | MSTRG.20764; |
| 2 StringTie exon      | 9202577 | 9202687 . | - . | transcript_MSTRG.20764.lgene_id | MSTRG.20764; |
| 2 StringTie exon      | 9203456 | 9203533 . | - . | transcript_MSTRG.20764.lgene_id | MSTRG.20764; |
| 2 StringTie exon      | 9204341 | 9204449 . | - . | transcript_MSTRG.20764.lgene_id | MSTRG.20764; |

|                        |          |            |     |                                 |              |
|------------------------|----------|------------|-----|---------------------------------|--------------|
| 2 StringTie transcript | 9202961  | 9204449 .  | - . | transcript_MSTRG.20764.†gene_id | MSTRG.20764; |
| 2 StringTie exon       | 9202961  | 9203071 .  | - . | transcript_MSTRG.20764.†gene_id | MSTRG.20764; |
| 2 StringTie exon       | 9203456  | 9203533 .  | - . | transcript_MSTRG.20764.†gene_id | MSTRG.20764; |
| 2 StringTie exon       | 9204341  | 9204449 .  | - . | transcript_MSTRG.20764.†gene_id | MSTRG.20764; |
| 2 StringTie transcript | 9207383  | 9210177 .  | - . | transcript_MSTRG.20764.†gene_id | MSTRG.20764; |
| 2 StringTie exon       | 9207383  | 9207430 .  | - . | transcript_MSTRG.20764.†gene_id | MSTRG.20764; |
| 2 StringTie exon       | 9209165  | 9209298 .  | - . | transcript_MSTRG.20764.†gene_id | MSTRG.20764; |
| 2 StringTie exon       | 9210067  | 9210177 .  | - . | transcript_MSTRG.20764.†gene_id | MSTRG.20764; |
| 2 StringTie transcript | 9208198  | 9211953 .  | - . | transcript_MSTRG.20764.†gene_id | MSTRG.20764; |
| 2 StringTie exon       | 9208198  | 9208308 .  | - . | transcript_MSTRG.20764.†gene_id | MSTRG.20764; |
| 2 StringTie exon       | 9211843  | 9211953 .  | - . | transcript_MSTRG.20764.†gene_id | MSTRG.20764; |
| 2 StringTie transcript | 9208807  | 9210177 .  | - . | transcript_MSTRG.20764.†gene_id | MSTRG.20764; |
| 2 StringTie exon       | 9208807  | 9208914 .  | - . | transcript_MSTRG.20764.†gene_id | MSTRG.20764; |
| 2 StringTie exon       | 9210067  | 9210177 .  | - . | transcript_MSTRG.20764.†gene_id | MSTRG.20764; |
| 2 StringTie transcript | 9535159  | 9535441 .  | - . | transcript_MSTRG.20641.†gene_id | MSTRG.20641; |
| 2 StringTie exon       | 9535159  | 9535268 .  | - . | transcript_MSTRG.20641.†gene_id | MSTRG.20641; |
| 2 StringTie exon       | 9535349  | 9535441 .  | - . | transcript_MSTRG.20641.†gene_id | MSTRG.20641; |
| 2 StringTie transcript | 18105753 | 18106747 . | - . | transcript_MSTRG.20857.†gene_id | MSTRG.20857; |
| 2 StringTie exon       | 18105753 | 18106481 . | - . | transcript_MSTRG.20857.†gene_id | MSTRG.20857; |
| 2 StringTie exon       | 18106585 | 18106747 . | - . | transcript_MSTRG.20857.†gene_id | MSTRG.20857; |
| 2 StringTie transcript | 25246858 | 25249568 . | - . | transcript_MSTRG.20917.†gene_id | MSTRG.20917; |
| 2 StringTie exon       | 25246858 | 25247573 . | - . | transcript_MSTRG.20917.†gene_id | MSTRG.20917; |
| 2 StringTie exon       | 25248313 | 25248488 . | - . | transcript_MSTRG.20917.†gene_id | MSTRG.20917; |
| 2 StringTie exon       | 25249473 | 25249568 . | - . | transcript_MSTRG.20917.†gene_id | MSTRG.20917; |
| 2 StringTie transcript | 25253607 | 25271633 . | - . | transcript_MSTRG.20919.†gene_id | MSTRG.20919; |
| 2 StringTie exon       | 25253607 | 25253705 . | - . | transcript_MSTRG.20919.†gene_id | MSTRG.20919; |
| 2 StringTie exon       | 25262975 | 25263148 . | - . | transcript_MSTRG.20919.†gene_id | MSTRG.20919; |
| 2 StringTie exon       | 25267669 | 25271633 . | - . | transcript_MSTRG.20919.†gene_id | MSTRG.20919; |
| 2 StringTie transcript | 25266018 | 25271146 . | - . | transcript_MSTRG.20919.†gene_id | MSTRG.20919; |
| 2 StringTie exon       | 25266018 | 25267754 . | - . | transcript_MSTRG.20919.†gene_id | MSTRG.20919; |
| 2 StringTie exon       | 25268652 | 25268869 . | - . | transcript_MSTRG.20919.†gene_id | MSTRG.20919; |
| 2 StringTie exon       | 25271067 | 25271146 . | - . | transcript_MSTRG.20919.†gene_id | MSTRG.20919; |
| 2 StringTie transcript | 28489533 | 28497593 . | - . | transcript_MSTRG.20992.†gene_id | MSTRG.20992; |
| 2 StringTie exon       | 28489533 | 28489584 . | - . | transcript_MSTRG.20992.†gene_id | MSTRG.20992; |
| 2 StringTie exon       | 28493225 | 28493268 . | - . | transcript_MSTRG.20992.†gene_id | MSTRG.20992; |

|                       |          |          |   |   |   |                                 |              |
|-----------------------|----------|----------|---|---|---|---------------------------------|--------------|
| 2 StringTie exon      | 28495334 | 28495531 | . | - | . | transcript_MSTRG.20992.lgene_id | MSTRG.20992; |
| 2 StringTie exon      | 28497469 | 28497593 | . | - | . | transcript_MSTRG.20992.lgene_id | MSTRG.20992; |
| 2 StringTie transcrip | 40553069 | 40616217 | . | - | . | transcript_MSTRG.21098.lgene_id | MSTRG.21098; |
| 2 StringTie exon      | 40553069 | 40553087 | . | - | . | transcript_MSTRG.21098.lgene_id | MSTRG.21098; |
| 2 StringTie exon      | 40615385 | 40616217 | . | - | . | transcript_MSTRG.21098.lgene_id | MSTRG.21098; |
| 2 StringTie transcrip | 40569994 | 40613659 | . | - | . | transcript_MSTRG.21098.lgene_id | MSTRG.21098; |
| 2 StringTie exon      | 40569994 | 40570024 | . | - | . | transcript_MSTRG.21098.lgene_id | MSTRG.21098; |
| 2 StringTie exon      | 40612960 | 40613659 | . | - | . | transcript_MSTRG.21098.lgene_id | MSTRG.21098; |
| 2 StringTie transcrip | 46333571 | 46336648 | . | - | . | transcript_MSTRG.21191.lgene_id | MSTRG.21191; |
| 2 StringTie exon      | 46333571 | 46334755 | . | - | . | transcript_MSTRG.21191.lgene_id | MSTRG.21191; |
| 2 StringTie exon      | 46334811 | 46336648 | . | - | . | transcript_MSTRG.21191.lgene_id | MSTRG.21191; |
| 2 StringTie transcrip | 46769553 | 46770310 | . | - | . | transcript_MSTRG.21203.lgene_id | MSTRG.21203; |
| 2 StringTie exon      | 46769553 | 46769789 | . | - | . | transcript_MSTRG.21203.lgene_id | MSTRG.21203; |
| 2 StringTie exon      | 46769864 | 46770310 | . | - | . | transcript_MSTRG.21203.lgene_id | MSTRG.21203; |
| 2 StringTie transcrip | 48414848 | 48460559 | . | - | . | transcript_MSTRG.21208.lgene_id | MSTRG.21208; |
| 2 StringTie exon      | 48414848 | 48414904 | . | - | . | transcript_MSTRG.21208.lgene_id | MSTRG.21208; |
| 2 StringTie exon      | 48444554 | 48444674 | . | - | . | transcript_MSTRG.21208.lgene_id | MSTRG.21208; |
| 2 StringTie exon      | 48460479 | 48460559 | . | - | . | transcript_MSTRG.21208.lgene_id | MSTRG.21208; |
| 2 StringTie transcrip | 51470458 | 51471304 | . | - | . | transcript_MSTRG.21349.lgene_id | MSTRG.21349; |
| 2 StringTie exon      | 51470458 | 51470579 | . | - | . | transcript_MSTRG.21349.lgene_id | MSTRG.21349; |
| 2 StringTie exon      | 51471187 | 51471304 | . | - | . | transcript_MSTRG.21349.lgene_id | MSTRG.21349; |
| 2 StringTie transcrip | 51650456 | 51657094 | . | - | . | transcript_MSTRG.21282.lgene_id | MSTRG.21282; |
| 2 StringTie exon      | 51650456 | 51655001 | . | - | . | transcript_MSTRG.21282.lgene_id | MSTRG.21282; |
| 2 StringTie exon      | 51656974 | 51657094 | . | - | . | transcript_MSTRG.21282.lgene_id | MSTRG.21282; |
| 2 StringTie transcrip | 51729601 | 51730585 | . | - | . | transcript_MSTRG.21287.lgene_id | MSTRG.21287; |
| 2 StringTie exon      | 51729601 | 51729661 | . | - | . | transcript_MSTRG.21287.lgene_id | MSTRG.21287; |
| 2 StringTie exon      | 51729765 | 51730585 | . | - | . | transcript_MSTRG.21287.lgene_id | MSTRG.21287; |
| 2 StringTie transcrip | 57848597 | 57870793 | . | - | . | transcript_MSTRG.21338.lgene_id | MSTRG.21338; |
| 2 StringTie exon      | 57848597 | 57848613 | . | - | . | transcript_MSTRG.21338.lgene_id | MSTRG.21338; |
| 2 StringTie exon      | 57869489 | 57870793 | . | - | . | transcript_MSTRG.21338.lgene_id | MSTRG.21338; |
| 2 StringTie transcrip | 62011611 | 62057651 | . | - | . | transcript_MSTRG.21489.lgene_id | MSTRG.21489; |
| 2 StringTie exon      | 62011611 | 62011736 | . | - | . | transcript_MSTRG.21489.lgene_id | MSTRG.21489; |
| 2 StringTie exon      | 62056704 | 62057651 | . | - | . | transcript_MSTRG.21489.lgene_id | MSTRG.21489; |
| 2 StringTie transcrip | 79202817 | 79204270 | . | - | . | transcript_MSTRG.22108.lgene_id | MSTRG.22108; |
| 2 StringTie exon      | 79202817 | 79203062 | . | - | . | transcript_MSTRG.22108.lgene_id | MSTRG.22108; |

|                        |           |           |   |   |   |                                 |              |
|------------------------|-----------|-----------|---|---|---|---------------------------------|--------------|
| 2 StringTie exon       | 79203654  | 79203766  | . | - | . | transcript_MSTRG.22108.lgene_id | MSTRG.22108; |
| 2 StringTie exon       | 79204092  | 79204270  | . | - | . | transcript_MSTRG.22108.lgene_id | MSTRG.22108; |
| 2 StringTie transcript | 85486691  | 85513807  | . | - | . | transcript_MSTRG.22266.lgene_id | MSTRG.22266; |
| 2 StringTie exon       | 85486691  | 85492619  | . | - | . | transcript_MSTRG.22266.lgene_id | MSTRG.22266; |
| 2 StringTie exon       | 85499494  | 85499654  | . | - | . | transcript_MSTRG.22266.lgene_id | MSTRG.22266; |
| 2 StringTie exon       | 85513667  | 85513807  | . | - | . | transcript_MSTRG.22266.lgene_id | MSTRG.22266; |
| 2 StringTie transcript | 85490502  | 85513781  | . | - | . | transcript_MSTRG.22266.lgene_id | MSTRG.22266; |
| 2 StringTie exon       | 85490502  | 85492619  | . | - | . | transcript_MSTRG.22266.lgene_id | MSTRG.22266; |
| 2 StringTie exon       | 85499494  | 85499654  | . | - | . | transcript_MSTRG.22266.lgene_id | MSTRG.22266; |
| 2 StringTie exon       | 85513712  | 85513781  | . | - | . | transcript_MSTRG.22266.lgene_id | MSTRG.22266; |
| 2 StringTie transcript | 88449576  | 88450530  | . | - | . | transcript_MSTRG.22302.lgene_id | MSTRG.22302; |
| 2 StringTie exon       | 88449576  | 88449660  | . | - | . | transcript_MSTRG.22302.lgene_id | MSTRG.22302; |
| 2 StringTie exon       | 88449961  | 88450075  | . | - | . | transcript_MSTRG.22302.lgene_id | MSTRG.22302; |
| 2 StringTie exon       | 88450382  | 88450530  | . | - | . | transcript_MSTRG.22302.lgene_id | MSTRG.22302; |
| 2 StringTie transcript | 88449576  | 88450530  | . | - | . | transcript_MSTRG.22302.lgene_id | MSTRG.22302; |
| 2 StringTie exon       | 88449576  | 88449660  | . | - | . | transcript_MSTRG.22302.lgene_id | MSTRG.22302; |
| 2 StringTie exon       | 88449961  | 88450113  | . | - | . | transcript_MSTRG.22302.lgene_id | MSTRG.22302; |
| 2 StringTie exon       | 88450420  | 88450530  | . | - | . | transcript_MSTRG.22302.lgene_id | MSTRG.22302; |
| 2 StringTie transcript | 91271983  | 91273602  | . | - | . | transcript_MSTRG.22398.lgene_id | MSTRG.22398; |
| 2 StringTie exon       | 91271983  | 91272303  | . | - | . | transcript_MSTRG.22398.lgene_id | MSTRG.22398; |
| 2 StringTie exon       | 91273560  | 91273602  | . | - | . | transcript_MSTRG.22398.lgene_id | MSTRG.22398; |
| 2 StringTie transcript | 100293711 | 100395947 | . | - | . | transcript_MSTRG.22494.lgene_id | MSTRG.22494; |
| 2 StringTie exon       | 100293711 | 100294100 | . | - | . | transcript_MSTRG.22494.lgene_id | MSTRG.22494; |
| 2 StringTie exon       | 100380422 | 100380618 | . | - | . | transcript_MSTRG.22494.lgene_id | MSTRG.22494; |
| 2 StringTie exon       | 100395891 | 100395947 | . | - | . | transcript_MSTRG.22494.lgene_id | MSTRG.22494; |
| 2 StringTie transcript | 102296665 | 102335493 | . | - | . | transcript_MSTRG.22530.lgene_id | MSTRG.22530; |
| 2 StringTie exon       | 102296665 | 102297586 | . | - | . | transcript_MSTRG.22530.lgene_id | MSTRG.22530; |
| 2 StringTie exon       | 102330090 | 102330137 | . | - | . | transcript_MSTRG.22530.lgene_id | MSTRG.22530; |
| 2 StringTie exon       | 102330881 | 102330967 | . | - | . | transcript_MSTRG.22530.lgene_id | MSTRG.22530; |
| 2 StringTie exon       | 102335377 | 102335493 | . | - | . | transcript_MSTRG.22530.lgene_id | MSTRG.22530; |
| 2 StringTie transcript | 102297383 | 102335457 | . | - | . | transcript_MSTRG.22530.lgene_id | MSTRG.22530; |
| 2 StringTie exon       | 102297383 | 102297586 | . | - | . | transcript_MSTRG.22530.lgene_id | MSTRG.22530; |
| 2 StringTie exon       | 102301121 | 102301195 | . | - | . | transcript_MSTRG.22530.lgene_id | MSTRG.22530; |
| 2 StringTie exon       | 102330881 | 102330967 | . | - | . | transcript_MSTRG.22530.lgene_id | MSTRG.22530; |
| 2 StringTie exon       | 102335377 | 102335457 | . | - | . | transcript_MSTRG.22530.lgene_id | MSTRG.22530; |

|                        |           |           |   |   |   |                         |          |              |
|------------------------|-----------|-----------|---|---|---|-------------------------|----------|--------------|
| 2 StringTie transcript | 102297386 | 102335456 | . | - | . | transcript_MSTRG.22530. | {gene_id | MSTRG.22530; |
| 2 StringTie exon       | 102297386 | 102297586 | . | - | . | transcript_MSTRG.22530. | {gene_id | MSTRG.22530; |
| 2 StringTie exon       | 102330881 | 102330967 | . | - | . | transcript_MSTRG.22530. | {gene_id | MSTRG.22530; |
| 2 StringTie exon       | 102335377 | 102335456 | . | - | . | transcript_MSTRG.22530. | {gene_id | MSTRG.22530; |
| 2 StringTie transcript | 105044217 | 105045622 | . | - | . | transcript_MSTRG.22608. | {gene_id | MSTRG.22608; |
| 2 StringTie exon       | 105044217 | 105044313 | . | - | . | transcript_MSTRG.22608. | {gene_id | MSTRG.22608; |
| 2 StringTie exon       | 105045002 | 105045622 | . | - | . | transcript_MSTRG.22608. | {gene_id | MSTRG.22608; |
| 2 StringTie transcript | 117504170 | 117505215 | . | - | . | transcript_MSTRG.22764. | {gene_id | MSTRG.22764; |
| 2 StringTie exon       | 117504170 | 117504280 | . | - | . | transcript_MSTRG.22764. | {gene_id | MSTRG.22764; |
| 2 StringTie exon       | 117504638 | 117504712 | . | - | . | transcript_MSTRG.22764. | {gene_id | MSTRG.22764; |
| 2 StringTie exon       | 117505105 | 117505215 | . | - | . | transcript_MSTRG.22764. | {gene_id | MSTRG.22764; |
| 2 StringTie transcript | 123306626 | 123313386 | . | - | . | transcript_MSTRG.22847. | {gene_id | MSTRG.22847; |
| 2 StringTie exon       | 123306626 | 123307240 | . | - | . | transcript_MSTRG.22847. | {gene_id | MSTRG.22847; |
| 2 StringTie exon       | 123312635 | 123313386 | . | - | . | transcript_MSTRG.22847. | {gene_id | MSTRG.22847; |
| 2 StringTie transcript | 130440426 | 130522522 | . | - | . | transcript_MSTRG.22901. | {gene_id | MSTRG.22901; |
| 2 StringTie exon       | 130440426 | 130440807 | . | - | . | transcript_MSTRG.22901. | {gene_id | MSTRG.22901; |
| 2 StringTie exon       | 130491950 | 130492050 | . | - | . | transcript_MSTRG.22901. | {gene_id | MSTRG.22901; |
| 2 StringTie exon       | 130522134 | 130522231 | . | - | . | transcript_MSTRG.22901. | {gene_id | MSTRG.22901; |
| 2 StringTie exon       | 130522433 | 130522522 | . | - | . | transcript_MSTRG.22901. | {gene_id | MSTRG.22901; |
| 2 StringTie transcript | 135118782 | 135119887 | . | - | . | transcript_MSTRG.23023. | {gene_id | MSTRG.23023; |
| 2 StringTie exon       | 135118782 | 135119103 | . | - | . | transcript_MSTRG.23023. | {gene_id | MSTRG.23023; |
| 2 StringTie exon       | 135119793 | 135119887 | . | - | . | transcript_MSTRG.23023. | {gene_id | MSTRG.23023; |
| 2 StringTie transcript | 136713256 | 136728868 | . | - | . | transcript_MSTRG.23064. | {gene_id | MSTRG.23064; |
| 2 StringTie exon       | 136713256 | 136713950 | . | - | . | transcript_MSTRG.23064. | {gene_id | MSTRG.23064; |
| 2 StringTie exon       | 136714498 | 136714597 | . | - | . | transcript_MSTRG.23064. | {gene_id | MSTRG.23064; |
| 2 StringTie exon       | 136716175 | 136716422 | . | - | . | transcript_MSTRG.23064. | {gene_id | MSTRG.23064; |
| 2 StringTie exon       | 136728602 | 136728868 | . | - | . | transcript_MSTRG.23064. | {gene_id | MSTRG.23064; |
| 2 StringTie transcript | 136931527 | 136957532 | . | - | . | transcript_MSTRG.23096. | {gene_id | MSTRG.23096; |
| 2 StringTie exon       | 136931527 | 136931875 | . | - | . | transcript_MSTRG.23096. | {gene_id | MSTRG.23096; |
| 2 StringTie exon       | 136946346 | 136946575 | . | - | . | transcript_MSTRG.23096. | {gene_id | MSTRG.23096; |
| 2 StringTie exon       | 136957329 | 136957532 | . | - | . | transcript_MSTRG.23096. | {gene_id | MSTRG.23096; |
| 2 StringTie transcript | 137383777 | 137385365 | . | - | . | transcript_MSTRG.23082. | {gene_id | MSTRG.23082; |
| 2 StringTie exon       | 137383777 | 137384143 | . | - | . | transcript_MSTRG.23082. | {gene_id | MSTRG.23082; |
| 2 StringTie exon       | 137384946 | 137385365 | . | - | . | transcript_MSTRG.23082. | {gene_id | MSTRG.23082; |
| 2 StringTie transcript | 137557556 | 137560808 | . | - | . | transcript_MSTRG.23085. | {gene_id | MSTRG.23085; |

|                        |           |           |   |   |   |                                 |              |
|------------------------|-----------|-----------|---|---|---|---------------------------------|--------------|
| 2 StringTie exon       | 137557556 | 137557877 | . | - | . | transcript_MSTRG.23085.lgene_id | MSTRG.23085; |
| 2 StringTie exon       | 137557911 | 137560808 | . | - | . | transcript_MSTRG.23085.lgene_id | MSTRG.23085; |
| 2 StringTie transcript | 138144615 | 138146329 | . | - | . | transcript_MSTRG.23086.lgene_id | MSTRG.23086; |
| 2 StringTie exon       | 138144615 | 138144807 | . | - | . | transcript_MSTRG.23086.lgene_id | MSTRG.23086; |
| 2 StringTie exon       | 138145491 | 138146329 | . | - | . | transcript_MSTRG.23086.lgene_id | MSTRG.23086; |
| 2 StringTie transcript | 141481009 | 141481792 | . | - | . | transcript_MSTRG.23166.lgene_id | MSTRG.23166; |
| 2 StringTie exon       | 141481009 | 141481264 | . | - | . | transcript_MSTRG.23166.lgene_id | MSTRG.23166; |
| 2 StringTie exon       | 141481401 | 141481792 | . | - | . | transcript_MSTRG.23166.lgene_id | MSTRG.23166; |
| 2 StringTie transcript | 141873490 | 141900151 | . | - | . | transcript_MSTRG.23176.lgene_id | MSTRG.23176; |
| 2 StringTie exon       | 141873490 | 141873522 | . | - | . | transcript_MSTRG.23176.lgene_id | MSTRG.23176; |
| 2 StringTie exon       | 141897823 | 141900151 | . | - | . | transcript_MSTRG.23176.lgene_id | MSTRG.23176; |
| 2 StringTie transcript | 142858908 | 142874601 | . | - | . | transcript_MSTRG.23232.lgene_id | MSTRG.23232; |
| 2 StringTie exon       | 142858908 | 142859159 | . | - | . | transcript_MSTRG.23232.lgene_id | MSTRG.23232; |
| 2 StringTie exon       | 142873129 | 142874601 | . | - | . | transcript_MSTRG.23232.lgene_id | MSTRG.23232; |
| 2 StringTie transcript | 142864170 | 142874691 | . | - | . | transcript_MSTRG.23232.lgene_id | MSTRG.23232; |
| 2 StringTie exon       | 142864170 | 142864349 | . | - | . | transcript_MSTRG.23232.lgene_id | MSTRG.23232; |
| 2 StringTie exon       | 142873129 | 142874691 | . | - | . | transcript_MSTRG.23232.lgene_id | MSTRG.23232; |
| 2 StringTie transcript | 144084295 | 144089512 | . | - | . | transcript_MSTRG.23279.lgene_id | MSTRG.23279; |
| 2 StringTie exon       | 144084295 | 144084367 | . | - | . | transcript_MSTRG.23279.lgene_id | MSTRG.23279; |
| 2 StringTie exon       | 144089312 | 144089512 | . | - | . | transcript_MSTRG.23279.lgene_id | MSTRG.23279; |
| 2 StringTie transcript | 149552448 | 149553203 | . | - | . | transcript_MSTRG.23373.lgene_id | MSTRG.23373; |
| 2 StringTie exon       | 149552448 | 149552505 | . | - | . | transcript_MSTRG.23373.lgene_id | MSTRG.23373; |
| 2 StringTie exon       | 149553005 | 149553203 | . | - | . | transcript_MSTRG.23373.lgene_id | MSTRG.23373; |
| 2 StringTie transcript | 150392988 | 150499256 | . | - | . | transcript_MSTRG.23412.lgene_id | MSTRG.23412; |
| 2 StringTie exon       | 150392988 | 150393296 | . | - | . | transcript_MSTRG.23412.lgene_id | MSTRG.23412; |
| 2 StringTie exon       | 150409569 | 150409701 | . | - | . | transcript_MSTRG.23412.lgene_id | MSTRG.23412; |
| 2 StringTie exon       | 150499137 | 150499256 | . | - | . | transcript_MSTRG.23412.lgene_id | MSTRG.23412; |
| 2 StringTie transcript | 150515242 | 150525096 | . | - | . | transcript_MSTRG.23416.lgene_id | MSTRG.23416; |
| 2 StringTie exon       | 150515242 | 150521028 | . | - | . | transcript_MSTRG.23416.lgene_id | MSTRG.23416; |
| 2 StringTie exon       | 150524899 | 150525096 | . | - | . | transcript_MSTRG.23416.lgene_id | MSTRG.23416; |
| 2 StringTie transcript | 150517068 | 150525569 | . | - | . | transcript_MSTRG.23416.lgene_id | MSTRG.23416; |
| 2 StringTie exon       | 150517068 | 150517165 | . | - | . | transcript_MSTRG.23416.lgene_id | MSTRG.23416; |
| 2 StringTie exon       | 150519165 | 150519286 | . | - | . | transcript_MSTRG.23416.lgene_id | MSTRG.23416; |
| 2 StringTie exon       | 150524899 | 150525569 | . | - | . | transcript_MSTRG.23416.lgene_id | MSTRG.23416; |
| 2 StringTie transcript | 150517752 | 150526916 | . | - | . | transcript_MSTRG.23416.lgene_id | MSTRG.23416; |

|                        |           |           |   |   |   |                                 |              |
|------------------------|-----------|-----------|---|---|---|---------------------------------|--------------|
| 2 StringTie exon       | 150517752 | 150517820 | . | - | . | transcript_MSTRG.23416.1gene_id | MSTRG.23416; |
| 2 StringTie exon       | 150519165 | 150519286 | . | - | . | transcript_MSTRG.23416.1gene_id | MSTRG.23416; |
| 2 StringTie exon       | 150526590 | 150526916 | . | - | . | transcript_MSTRG.23416.1gene_id | MSTRG.23416; |
| 2 StringTie transcript | 150528214 | 150535922 | . | - | . | transcript_MSTRG.23416.1gene_id | MSTRG.23416; |
| 2 StringTie exon       | 150528214 | 150529079 | . | - | . | transcript_MSTRG.23416.1gene_id | MSTRG.23416; |
| 2 StringTie exon       | 150531160 | 150531253 | . | - | . | transcript_MSTRG.23416.1gene_id | MSTRG.23416; |
| 2 StringTie exon       | 150535646 | 150535922 | . | - | . | transcript_MSTRG.23416.1gene_id | MSTRG.23416; |
| 2 StringTie transcript | 150528289 | 150536048 | . | - | . | transcript_MSTRG.23416.1gene_id | MSTRG.23416; |
| 2 StringTie exon       | 150528289 | 150529079 | . | - | . | transcript_MSTRG.23416.1gene_id | MSTRG.23416; |
| 2 StringTie exon       | 150531160 | 150531253 | . | - | . | transcript_MSTRG.23416.1gene_id | MSTRG.23416; |
| 2 StringTie exon       | 150532037 | 150532202 | . | - | . | transcript_MSTRG.23416.1gene_id | MSTRG.23416; |
| 2 StringTie exon       | 150535646 | 150536048 | . | - | . | transcript_MSTRG.23416.1gene_id | MSTRG.23416; |
| 2 StringTie transcript | 150531222 | 150531621 | . | - | . | transcript_MSTRG.23416.1gene_id | MSTRG.23416; |
| 2 StringTie exon       | 150531222 | 150531253 | . | - | . | transcript_MSTRG.23416.1gene_id | MSTRG.23416; |
| 2 StringTie exon       | 150531352 | 150531621 | . | - | . | transcript_MSTRG.23416.1gene_id | MSTRG.23416; |
| 2 StringTie transcript | 150557834 | 150581699 | . | - | . | transcript_MSTRG.23416.1gene_id | MSTRG.23416; |
| 2 StringTie exon       | 150557834 | 150559186 | . | - | . | transcript_MSTRG.23416.1gene_id | MSTRG.23416; |
| 2 StringTie exon       | 150580217 | 150581699 | . | - | . | transcript_MSTRG.23416.1gene_id | MSTRG.23416; |
| 2 StringTie transcript | 150562346 | 150581697 | . | - | . | transcript_MSTRG.23416.1gene_id | MSTRG.23416; |
| 2 StringTie exon       | 150562346 | 150562854 | . | - | . | transcript_MSTRG.23416.1gene_id | MSTRG.23416; |
| 2 StringTie exon       | 150580217 | 150581697 | . | - | . | transcript_MSTRG.23416.1gene_id | MSTRG.23416; |
| 2 StringTie transcript | 150530129 | 150530726 | . | - | . | transcript_MSTRG.23418.1gene_id | MSTRG.23418; |
| 2 StringTie exon       | 150530129 | 150530625 | . | - | . | transcript_MSTRG.23418.1gene_id | MSTRG.23418; |
| 2 StringTie exon       | 150530678 | 150530726 | . | - | . | transcript_MSTRG.23418.1gene_id | MSTRG.23418; |
| 2 StringTie transcript | 150816816 | 150825223 | . | - | . | transcript_MSTRG.23404.1gene_id | MSTRG.23404; |
| 2 StringTie exon       | 150816816 | 150821163 | . | - | . | transcript_MSTRG.23404.1gene_id | MSTRG.23404; |
| 2 StringTie exon       | 150825169 | 150825223 | . | - | . | transcript_MSTRG.23404.1gene_id | MSTRG.23404; |
| 2 StringTie transcript | 151742556 | 151745517 | . | - | . | transcript_MSTRG.23441.1gene_id | MSTRG.23441; |
| 2 StringTie exon       | 151742556 | 151743518 | . | - | . | transcript_MSTRG.23441.1gene_id | MSTRG.23441; |
| 2 StringTie exon       | 151744975 | 151745517 | . | - | . | transcript_MSTRG.23441.1gene_id | MSTRG.23441; |
| 3 StringTie transcript | 1721093   | 1788850   | . | + | . | transcript_MSTRG.23503.1gene_id | MSTRG.23503; |
| 3 StringTie exon       | 1721093   | 1721155   | . | + | . | transcript_MSTRG.23503.1gene_id | MSTRG.23503; |
| 3 StringTie exon       | 1761839   | 1761939   | . | + | . | transcript_MSTRG.23503.1gene_id | MSTRG.23503; |
| 3 StringTie exon       | 1772361   | 1772422   | . | + | . | transcript_MSTRG.23503.1gene_id | MSTRG.23503; |
| 3 StringTie exon       | 1788699   | 1788850   | . | + | . | transcript_MSTRG.23503.1gene_id | MSTRG.23503; |



|                       |          |            |   |   |                                 |              |
|-----------------------|----------|------------|---|---|---------------------------------|--------------|
| 3 StringTie transcrip | 4120688  | 4124151 .  | + | . | transcript_MSTRG.23543.lgene_id | MSTRG.23543; |
| 3 StringTie exon      | 4120688  | 4121469 .  | + | . | transcript_MSTRG.23543.lgene_id | MSTRG.23543; |
| 3 StringTie exon      | 4122439  | 4122476 .  | + | . | transcript_MSTRG.23543.lgene_id | MSTRG.23543; |
| 3 StringTie exon      | 4123678  | 4124151 .  | + | . | transcript_MSTRG.23543.lgene_id | MSTRG.23543; |
| 3 StringTie transcrip | 5498351  | 5504851 .  | + | . | transcript_MSTRG.23595.lgene_id | MSTRG.23595; |
| 3 StringTie exon      | 5498351  | 5500913 .  | + | . | transcript_MSTRG.23595.lgene_id | MSTRG.23595; |
| 3 StringTie exon      | 5504022  | 5504851 .  | + | . | transcript_MSTRG.23595.lgene_id | MSTRG.23595; |
| 3 StringTie transcrip | 6422379  | 6425678 .  | + | . | transcript_MSTRG.23611.lgene_id | MSTRG.23611; |
| 3 StringTie exon      | 6422379  | 6422987 .  | + | . | transcript_MSTRG.23611.lgene_id | MSTRG.23611; |
| 3 StringTie exon      | 6425649  | 6425678 .  | + | . | transcript_MSTRG.23611.lgene_id | MSTRG.23611; |
| 3 StringTie transcrip | 7646107  | 7653415 .  | + | . | transcript_MSTRG.23649.lgene_id | MSTRG.23649; |
| 3 StringTie exon      | 7646107  | 7646258 .  | + | . | transcript_MSTRG.23649.lgene_id | MSTRG.23649; |
| 3 StringTie exon      | 7651000  | 7653415 .  | + | . | transcript_MSTRG.23649.lgene_id | MSTRG.23649; |
| 3 StringTie transcrip | 8942030  | 8946849 .  | + | . | transcript_MSTRG.23725.lgene_id | MSTRG.23725; |
| 3 StringTie exon      | 8942030  | 8942134 .  | + | . | transcript_MSTRG.23725.lgene_id | MSTRG.23725; |
| 3 StringTie exon      | 8945087  | 8945300 .  | + | . | transcript_MSTRG.23725.lgene_id | MSTRG.23725; |
| 3 StringTie exon      | 8946748  | 8946849 .  | + | . | transcript_MSTRG.23725.lgene_id | MSTRG.23725; |
| 3 StringTie transcrip | 10536603 | 10635884 . | + | . | transcript_MSTRG.23768.lgene_id | MSTRG.23768; |
| 3 StringTie exon      | 10536603 | 10536637 . | + | . | transcript_MSTRG.23768.lgene_id | MSTRG.23768; |
| 3 StringTie exon      | 10635617 | 10635884 . | + | . | transcript_MSTRG.23768.lgene_id | MSTRG.23768; |
| 3 StringTie transcrip | 12040281 | 12060327 . | + | . | transcript_MSTRG.23836.lgene_id | MSTRG.23836; |
| 3 StringTie exon      | 12040281 | 12040339 . | + | . | transcript_MSTRG.23836.lgene_id | MSTRG.23836; |
| 3 StringTie exon      | 12041100 | 12041172 . | + | . | transcript_MSTRG.23836.lgene_id | MSTRG.23836; |
| 3 StringTie exon      | 12042144 | 12042224 . | + | . | transcript_MSTRG.23836.lgene_id | MSTRG.23836; |
| 3 StringTie exon      | 12060253 | 12060327 . | + | . | transcript_MSTRG.23836.lgene_id | MSTRG.23836; |
| 3 StringTie transcrip | 16376831 | 16388410 . | + | . | transcript_MSTRG.23872.lgene_id | MSTRG.23872; |
| 3 StringTie exon      | 16376831 | 16376980 . | + | . | transcript_MSTRG.23872.lgene_id | MSTRG.23872; |
| 3 StringTie exon      | 16382682 | 16382827 . | + | . | transcript_MSTRG.23872.lgene_id | MSTRG.23872; |
| 3 StringTie exon      | 16388145 | 16388410 . | + | . | transcript_MSTRG.23872.lgene_id | MSTRG.23872; |
| 3 StringTie transcrip | 17431158 | 17436921 . | + | . | transcript_MSTRG.23938.lgene_id | MSTRG.23938; |
| 3 StringTie exon      | 17431158 | 17431219 . | + | . | transcript_MSTRG.23938.lgene_id | MSTRG.23938; |
| 3 StringTie exon      | 17432977 | 17433106 . | + | . | transcript_MSTRG.23938.lgene_id | MSTRG.23938; |
| 3 StringTie exon      | 17436858 | 17436921 . | + | . | transcript_MSTRG.23938.lgene_id | MSTRG.23938; |
| 3 StringTie transcrip | 17909773 | 17911691 . | + | . | transcript_MSTRG.23986.lgene_id | MSTRG.23986; |
| 3 StringTie exon      | 17909773 | 17909842 . | + | . | transcript_MSTRG.23986.lgene_id | MSTRG.23986; |

|                       |          |            |   |   |                                 |              |
|-----------------------|----------|------------|---|---|---------------------------------|--------------|
| 3 StringTie exon      | 17910742 | 17911691 . | + | . | transcript_MSTRG.23986.lgene_id | MSTRG.23986; |
| 3 StringTie transcrip | 23720311 | 23760058 . | + | . | transcript_MSTRG.24094.lgene_id | MSTRG.24094; |
| 3 StringTie exon      | 23720311 | 23720418 . | + | . | transcript_MSTRG.24094.lgene_id | MSTRG.24094; |
| 3 StringTie exon      | 23721008 | 23721095 . | + | . | transcript_MSTRG.24094.lgene_id | MSTRG.24094; |
| 3 StringTie exon      | 23754421 | 23754532 . | + | . | transcript_MSTRG.24094.lgene_id | MSTRG.24094; |
| 3 StringTie exon      | 23756048 | 23760058 . | + | . | transcript_MSTRG.24094.lgene_id | MSTRG.24094; |
| 3 StringTie transcrip | 23720320 | 23792578 . | + | . | transcript_MSTRG.24094.lgene_id | MSTRG.24094; |
| 3 StringTie exon      | 23720320 | 23720418 . | + | . | transcript_MSTRG.24094.lgene_id | MSTRG.24094; |
| 3 StringTie exon      | 23721008 | 23721095 . | + | . | transcript_MSTRG.24094.lgene_id | MSTRG.24094; |
| 3 StringTie exon      | 23754421 | 23754532 . | + | . | transcript_MSTRG.24094.lgene_id | MSTRG.24094; |
| 3 StringTie exon      | 23775095 | 23775223 . | + | . | transcript_MSTRG.24094.lgene_id | MSTRG.24094; |
| 3 StringTie exon      | 23792546 | 23792578 . | + | . | transcript_MSTRG.24094.lgene_id | MSTRG.24094; |
| 3 StringTie transcrip | 23720341 | 23777802 . | + | . | transcript_MSTRG.24094.lgene_id | MSTRG.24094; |
| 3 StringTie exon      | 23720341 | 23720418 . | + | . | transcript_MSTRG.24094.lgene_id | MSTRG.24094; |
| 3 StringTie exon      | 23721008 | 23721095 . | + | . | transcript_MSTRG.24094.lgene_id | MSTRG.24094; |
| 3 StringTie exon      | 23754421 | 23754532 . | + | . | transcript_MSTRG.24094.lgene_id | MSTRG.24094; |
| 3 StringTie exon      | 23775095 | 23775223 . | + | . | transcript_MSTRG.24094.lgene_id | MSTRG.24094; |
| 3 StringTie exon      | 23777558 | 23777802 . | + | . | transcript_MSTRG.24094.lgene_id | MSTRG.24094; |
| 3 StringTie transcrip | 23720342 | 23731341 . | + | . | transcript_MSTRG.24094.lgene_id | MSTRG.24094; |
| 3 StringTie exon      | 23720342 | 23720418 . | + | . | transcript_MSTRG.24094.lgene_id | MSTRG.24094; |
| 3 StringTie exon      | 23721008 | 23721095 . | + | . | transcript_MSTRG.24094.lgene_id | MSTRG.24094; |
| 3 StringTie exon      | 23731014 | 23731341 . | + | . | transcript_MSTRG.24094.lgene_id | MSTRG.24094; |
| 3 StringTie transcrip | 23754421 | 23796665 . | + | . | transcript_MSTRG.24094.lgene_id | MSTRG.24094; |
| 3 StringTie exon      | 23754421 | 23754532 . | + | . | transcript_MSTRG.24094.lgene_id | MSTRG.24094; |
| 3 StringTie exon      | 23775095 | 23775223 . | + | . | transcript_MSTRG.24094.lgene_id | MSTRG.24094; |
| 3 StringTie exon      | 23796128 | 23796665 . | + | . | transcript_MSTRG.24094.lgene_id | MSTRG.24094; |
| 3 StringTie transcrip | 27379195 | 27385447 . | + | . | transcript_MSTRG.24177.lgene_id | MSTRG.24177; |
| 3 StringTie exon      | 27379195 | 27379310 . | + | . | transcript_MSTRG.24177.lgene_id | MSTRG.24177; |
| 3 StringTie exon      | 27382972 | 27385447 . | + | . | transcript_MSTRG.24177.lgene_id | MSTRG.24177; |
| 3 StringTie transcrip | 28567903 | 28572792 . | + | . | transcript_MSTRG.24188.lgene_id | MSTRG.24188; |
| 3 StringTie exon      | 28567903 | 28568073 . | + | . | transcript_MSTRG.24188.lgene_id | MSTRG.24188; |
| 3 StringTie exon      | 28572526 | 28572792 . | + | . | transcript_MSTRG.24188.lgene_id | MSTRG.24188; |
| 3 StringTie transcrip | 28578810 | 28588752 . | + | . | transcript_MSTRG.24190.lgene_id | MSTRG.24190; |
| 3 StringTie exon      | 28578810 | 28578904 . | + | . | transcript_MSTRG.24190.lgene_id | MSTRG.24190; |
| 3 StringTie exon      | 28587997 | 28588116 . | + | . | transcript_MSTRG.24190.lgene_id | MSTRG.24190; |

|                       |          |          |   |   |   |                                 |              |
|-----------------------|----------|----------|---|---|---|---------------------------------|--------------|
| 3 StringTie exon      | 28588643 | 28588752 | . | + | . | transcript_MSTRG.24190.¿gene_id | MSTRG.24190; |
| 3 StringTie transcrip | 31133728 | 31137638 | . | + | . | transcript_MSTRG.24214.¿gene_id | MSTRG.24214; |
| 3 StringTie exon      | 31133728 | 31133834 | . | + | . | transcript_MSTRG.24214.¿gene_id | MSTRG.24214; |
| 3 StringTie exon      | 31137531 | 31137638 | . | + | . | transcript_MSTRG.24214.¿gene_id | MSTRG.24214; |
| 3 StringTie transcrip | 31133747 | 31141503 | . | + | . | transcript_MSTRG.24214.¿gene_id | MSTRG.24214; |
| 3 StringTie exon      | 31133747 | 31133834 | . | + | . | transcript_MSTRG.24214.¿gene_id | MSTRG.24214; |
| 3 StringTie exon      | 31140914 | 31141503 | . | + | . | transcript_MSTRG.24214.¿gene_id | MSTRG.24214; |
| 3 StringTie transcrip | 32530151 | 32530905 | . | + | . | transcript_MSTRG.24234.¿gene_id | MSTRG.24234; |
| 3 StringTie exon      | 32530151 | 32530360 | . | + | . | transcript_MSTRG.24234.¿gene_id | MSTRG.24234; |
| 3 StringTie exon      | 32530871 | 32530905 | . | + | . | transcript_MSTRG.24234.¿gene_id | MSTRG.24234; |
| 3 StringTie transcrip | 37633012 | 37635786 | . | + | . | transcript_MSTRG.24264.¿gene_id | MSTRG.24264; |
| 3 StringTie exon      | 37633012 | 37633077 | . | + | . | transcript_MSTRG.24264.¿gene_id | MSTRG.24264; |
| 3 StringTie exon      | 37634671 | 37634885 | . | + | . | transcript_MSTRG.24264.¿gene_id | MSTRG.24264; |
| 3 StringTie exon      | 37635214 | 37635786 | . | + | . | transcript_MSTRG.24264.¿gene_id | MSTRG.24264; |
| 3 StringTie transcrip | 38399026 | 38399951 | . | + | . | transcript_MSTRG.24308.¿gene_id | MSTRG.24308; |
| 3 StringTie exon      | 38399026 | 38399580 | . | + | . | transcript_MSTRG.24308.¿gene_id | MSTRG.24308; |
| 3 StringTie exon      | 38399907 | 38399951 | . | + | . | transcript_MSTRG.24308.¿gene_id | MSTRG.24308; |
| 3 StringTie transcrip | 41265797 | 41266613 | . | + | . | transcript_MSTRG.24495.¿gene_id | MSTRG.24495; |
| 3 StringTie exon      | 41265797 | 41266215 | . | + | . | transcript_MSTRG.24495.¿gene_id | MSTRG.24495; |
| 3 StringTie exon      | 41266268 | 41266613 | . | + | . | transcript_MSTRG.24495.¿gene_id | MSTRG.24495; |
| 3 StringTie transcrip | 41482346 | 41486942 | . | + | . | transcript_MSTRG.24516.¿gene_id | MSTRG.24516; |
| 3 StringTie exon      | 41482346 | 41482485 | . | + | . | transcript_MSTRG.24516.¿gene_id | MSTRG.24516; |
| 3 StringTie exon      | 41486832 | 41486942 | . | + | . | transcript_MSTRG.24516.¿gene_id | MSTRG.24516; |
| 3 StringTie transcrip | 43915868 | 43950785 | . | + | . | transcript_MSTRG.24607.¿gene_id | MSTRG.24607; |
| 3 StringTie exon      | 43915868 | 43916244 | . | + | . | transcript_MSTRG.24607.¿gene_id | MSTRG.24607; |
| 3 StringTie exon      | 43950718 | 43950785 | . | + | . | transcript_MSTRG.24607.¿gene_id | MSTRG.24607; |
| 3 StringTie transcrip | 44022714 | 44024477 | . | + | . | transcript_MSTRG.24612.¿gene_id | MSTRG.24612; |
| 3 StringTie exon      | 44022714 | 44023005 | . | + | . | transcript_MSTRG.24612.¿gene_id | MSTRG.24612; |
| 3 StringTie exon      | 44023826 | 44024477 | . | + | . | transcript_MSTRG.24612.¿gene_id | MSTRG.24612; |
| 3 StringTie transcrip | 44352216 | 44355059 | . | + | . | transcript_MSTRG.24630.¿gene_id | MSTRG.24630; |
| 3 StringTie exon      | 44352216 | 44352275 | . | + | . | transcript_MSTRG.24630.¿gene_id | MSTRG.24630; |
| 3 StringTie exon      | 44354092 | 44355059 | . | + | . | transcript_MSTRG.24630.¿gene_id | MSTRG.24630; |
| 3 StringTie transcrip | 52648699 | 52652979 | . | + | . | transcript_MSTRG.24736.¿gene_id | MSTRG.24736; |
| 3 StringTie exon      | 52648699 | 52648928 | . | + | . | transcript_MSTRG.24736.¿gene_id | MSTRG.24736; |
| 3 StringTie exon      | 52650163 | 52650301 | . | + | . | transcript_MSTRG.24736.¿gene_id | MSTRG.24736; |

|                       |           |             |   |   |                                 |              |
|-----------------------|-----------|-------------|---|---|---------------------------------|--------------|
| 3 StringTie exon      | 52651791  | 52652979 .  | + | . | transcript_MSTRG.24736.lgene_id | MSTRG.24736; |
| 3 StringTie transcrip | 58097049  | 58117254 .  | + | . | transcript_MSTRG.24857.lgene_id | MSTRG.24857; |
| 3 StringTie exon      | 58097049  | 58097085 .  | + | . | transcript_MSTRG.24857.lgene_id | MSTRG.24857; |
| 3 StringTie exon      | 58098338  | 58098366 .  | + | . | transcript_MSTRG.24857.lgene_id | MSTRG.24857; |
| 3 StringTie exon      | 58112481  | 58112532 .  | + | . | transcript_MSTRG.24857.lgene_id | MSTRG.24857; |
| 3 StringTie exon      | 58116765  | 58117254 .  | + | . | transcript_MSTRG.24857.lgene_id | MSTRG.24857; |
| 3 StringTie transcrip | 59426152  | 59450355 .  | + | . | transcript_MSTRG.24955.lgene_id | MSTRG.24955; |
| 3 StringTie exon      | 59426152  | 59426179 .  | + | . | transcript_MSTRG.24955.lgene_id | MSTRG.24955; |
| 3 StringTie exon      | 59449127  | 59450355 .  | + | . | transcript_MSTRG.24955.lgene_id | MSTRG.24955; |
| 3 StringTie transcrip | 71435798  | 71447325 .  | + | . | transcript_MSTRG.25069.lgene_id | MSTRG.25069; |
| 3 StringTie exon      | 71435798  | 71435889 .  | + | . | transcript_MSTRG.25069.lgene_id | MSTRG.25069; |
| 3 StringTie exon      | 71444761  | 71444866 .  | + | . | transcript_MSTRG.25069.lgene_id | MSTRG.25069; |
| 3 StringTie exon      | 71447264  | 71447325 .  | + | . | transcript_MSTRG.25069.lgene_id | MSTRG.25069; |
| 3 StringTie transcrip | 72277357  | 72281811 .  | + | . | transcript_MSTRG.25078.lgene_id | MSTRG.25078; |
| 3 StringTie exon      | 72277357  | 72278232 .  | + | . | transcript_MSTRG.25078.lgene_id | MSTRG.25078; |
| 3 StringTie exon      | 72279670  | 72281811 .  | + | . | transcript_MSTRG.25078.lgene_id | MSTRG.25078; |
| 3 StringTie transcrip | 72596634  | 72636719 .  | + | . | transcript_MSTRG.25107.lgene_id | MSTRG.25107; |
| 3 StringTie exon      | 72596634  | 72596655 .  | + | . | transcript_MSTRG.25107.lgene_id | MSTRG.25107; |
| 3 StringTie exon      | 72635308  | 72636719 .  | + | . | transcript_MSTRG.25107.lgene_id | MSTRG.25107; |
| 3 StringTie transcrip | 77422247  | 77423790 .  | + | . | transcript_MSTRG.25178.lgene_id | MSTRG.25178; |
| 3 StringTie exon      | 77422247  | 77422548 .  | + | . | transcript_MSTRG.25178.lgene_id | MSTRG.25178; |
| 3 StringTie exon      | 77423558  | 77423790 .  | + | . | transcript_MSTRG.25178.lgene_id | MSTRG.25178; |
| 3 StringTie transcrip | 77658656  | 77704950 .  | + | . | transcript_MSTRG.25186.lgene_id | MSTRG.25186; |
| 3 StringTie exon      | 77658656  | 77658776 .  | + | . | transcript_MSTRG.25186.lgene_id | MSTRG.25186; |
| 3 StringTie exon      | 77670974  | 77671034 .  | + | . | transcript_MSTRG.25186.lgene_id | MSTRG.25186; |
| 3 StringTie exon      | 77704124  | 77704272 .  | + | . | transcript_MSTRG.25186.lgene_id | MSTRG.25186; |
| 3 StringTie exon      | 77704888  | 77704950 .  | + | . | transcript_MSTRG.25186.lgene_id | MSTRG.25186; |
| 3 StringTie transcrip | 94012811  | 94013906 .  | + | . | transcript_MSTRG.25446.lgene_id | MSTRG.25446; |
| 3 StringTie exon      | 94012811  | 94012944 .  | + | . | transcript_MSTRG.25446.lgene_id | MSTRG.25446; |
| 3 StringTie exon      | 94013838  | 94013906 .  | + | . | transcript_MSTRG.25446.lgene_id | MSTRG.25446; |
| 3 StringTie transcrip | 94069841  | 94073841 .  | + | . | transcript_MSTRG.25441.lgene_id | MSTRG.25441; |
| 3 StringTie exon      | 94069841  | 94069934 .  | + | . | transcript_MSTRG.25441.lgene_id | MSTRG.25441; |
| 3 StringTie exon      | 94073310  | 94073841 .  | + | . | transcript_MSTRG.25441.lgene_id | MSTRG.25441; |
| 3 StringTie transcrip | 109175445 | 109187039 . | + | . | transcript_MSTRG.25683.lgene_id | MSTRG.25683; |
| 3 StringTie exon      | 109175445 | 109175483 . | + | . | transcript_MSTRG.25683.lgene_id | MSTRG.25683; |

|                       |           |           |   |   |   |                                 |              |
|-----------------------|-----------|-----------|---|---|---|---------------------------------|--------------|
| 3 StringTie exon      | 109186167 | 109187039 | . | + | . | transcript_MSTRG.25683.lgene_id | MSTRG.25683; |
| 3 StringTie transcrip | 110649034 | 110652626 | . | + | . | transcript_MSTRG.25710.lgene_id | MSTRG.25710; |
| 3 StringTie exon      | 110649034 | 110649359 | . | + | . | transcript_MSTRG.25710.lgene_id | MSTRG.25710; |
| 3 StringTie exon      | 110652528 | 110652626 | . | + | . | transcript_MSTRG.25710.lgene_id | MSTRG.25710; |
| 3 StringTie transcrip | 115178006 | 115475934 | . | + | . | transcript_MSTRG.25853.lgene_id | MSTRG.25853; |
| 3 StringTie exon      | 115178006 | 115178211 | . | + | . | transcript_MSTRG.25853.lgene_id | MSTRG.25853; |
| 3 StringTie exon      | 115218429 | 115219189 | . | + | . | transcript_MSTRG.25853.lgene_id | MSTRG.25853; |
| 3 StringTie exon      | 115323329 | 115323417 | . | + | . | transcript_MSTRG.25853.lgene_id | MSTRG.25853; |
| 3 StringTie exon      | 115339722 | 115339925 | . | + | . | transcript_MSTRG.25853.lgene_id | MSTRG.25853; |
| 3 StringTie exon      | 115440940 | 115441103 | . | + | . | transcript_MSTRG.25853.lgene_id | MSTRG.25853; |
| 3 StringTie exon      | 115475857 | 115475934 | . | + | . | transcript_MSTRG.25853.lgene_id | MSTRG.25853; |
| 3 StringTie transcrip | 115178146 | 115458542 | . | + | . | transcript_MSTRG.25853.lgene_id | MSTRG.25853; |
| 3 StringTie exon      | 115178146 | 115178211 | . | + | . | transcript_MSTRG.25853.lgene_id | MSTRG.25853; |
| 3 StringTie exon      | 115218429 | 115219189 | . | + | . | transcript_MSTRG.25853.lgene_id | MSTRG.25853; |
| 3 StringTie exon      | 115323329 | 115323417 | . | + | . | transcript_MSTRG.25853.lgene_id | MSTRG.25853; |
| 3 StringTie exon      | 115440940 | 115441103 | . | + | . | transcript_MSTRG.25853.lgene_id | MSTRG.25853; |
| 3 StringTie exon      | 115456167 | 115456209 | . | + | . | transcript_MSTRG.25853.lgene_id | MSTRG.25853; |
| 3 StringTie exon      | 115456988 | 115458542 | . | + | . | transcript_MSTRG.25853.lgene_id | MSTRG.25853; |
| 3 StringTie transcrip | 115178155 | 115441199 | . | + | . | transcript_MSTRG.25853.lgene_id | MSTRG.25853; |
| 3 StringTie exon      | 115178155 | 115178211 | . | + | . | transcript_MSTRG.25853.lgene_id | MSTRG.25853; |
| 3 StringTie exon      | 115218429 | 115219189 | . | + | . | transcript_MSTRG.25853.lgene_id | MSTRG.25853; |
| 3 StringTie exon      | 115323329 | 115323417 | . | + | . | transcript_MSTRG.25853.lgene_id | MSTRG.25853; |
| 3 StringTie exon      | 115344701 | 115344904 | . | + | . | transcript_MSTRG.25853.lgene_id | MSTRG.25853; |
| 3 StringTie exon      | 115440940 | 115441199 | . | + | . | transcript_MSTRG.25853.lgene_id | MSTRG.25853; |
| 3 StringTie transcrip | 115218442 | 115600677 | . | + | . | transcript_MSTRG.25853.lgene_id | MSTRG.25853; |
| 3 StringTie exon      | 115218442 | 115219189 | . | + | . | transcript_MSTRG.25853.lgene_id | MSTRG.25853; |
| 3 StringTie exon      | 115323329 | 115323417 | . | + | . | transcript_MSTRG.25853.lgene_id | MSTRG.25853; |
| 3 StringTie exon      | 115344701 | 115344904 | . | + | . | transcript_MSTRG.25853.lgene_id | MSTRG.25853; |
| 3 StringTie exon      | 115600656 | 115600677 | . | + | . | transcript_MSTRG.25853.lgene_id | MSTRG.25853; |
| 3 StringTie transcrip | 115344698 | 115386338 | . | + | . | transcript_MSTRG.25853.lgene_id | MSTRG.25853; |
| 3 StringTie exon      | 115344698 | 115344904 | . | + | . | transcript_MSTRG.25853.lgene_id | MSTRG.25853; |
| 3 StringTie exon      | 115386249 | 115386338 | . | + | . | transcript_MSTRG.25853.lgene_id | MSTRG.25853; |
| 3 StringTie transcrip | 115453174 | 115459086 | . | + | . | transcript_MSTRG.25853.lgene_id | MSTRG.25853; |
| 3 StringTie exon      | 115453174 | 115453870 | . | + | . | transcript_MSTRG.25853.lgene_id | MSTRG.25853; |
| 3 StringTie exon      | 115456167 | 115456209 | . | + | . | transcript_MSTRG.25853.lgene_id | MSTRG.25853; |

|                       |           |           |   |   |   |                                 |              |
|-----------------------|-----------|-----------|---|---|---|---------------------------------|--------------|
| 3 StringTie exon      | 115456988 | 115459086 | . | + | . | transcript_MSTRG.25853.(gene_id | MSTRG.25853; |
| 3 StringTie transcrip | 125276327 | 125276691 | . | + | . | transcript_MSTRG.25956.lgene_id | MSTRG.25956; |
| 3 StringTie exon      | 125276327 | 125276412 | . | + | . | transcript_MSTRG.25956.lgene_id | MSTRG.25956; |
| 3 StringTie exon      | 125276494 | 125276691 | . | + | . | transcript_MSTRG.25956.lgene_id | MSTRG.25956; |
| 3 StringTie transcrip | 127524535 | 127525392 | . | + | . | transcript_MSTRG.26004.lgene_id | MSTRG.26004; |
| 3 StringTie exon      | 127524535 | 127524649 | . | + | . | transcript_MSTRG.26004.lgene_id | MSTRG.26004; |
| 3 StringTie exon      | 127524792 | 127525392 | . | + | . | transcript_MSTRG.26004.lgene_id | MSTRG.26004; |
| 3 StringTie transcrip | 514634    | 534637    | . | - | . | transcript_MSTRG.23487.lgene_id | MSTRG.23487; |
| 3 StringTie exon      | 514634    | 515111    | . | - | . | transcript_MSTRG.23487.lgene_id | MSTRG.23487; |
| 3 StringTie exon      | 534479    | 534637    | . | - | . | transcript_MSTRG.23487.lgene_id | MSTRG.23487; |
| 3 StringTie transcrip | 514653    | 534593    | . | - | . | transcript_MSTRG.23487.(gene_id | MSTRG.23487; |
| 3 StringTie exon      | 514653    | 515111    | . | - | . | transcript_MSTRG.23487.(gene_id | MSTRG.23487; |
| 3 StringTie exon      | 534418    | 534593    | . | - | . | transcript_MSTRG.23487.(gene_id | MSTRG.23487; |
| 3 StringTie transcrip | 5039318   | 5116873   | . | - | . | transcript_MSTRG.23587.lgene_id | MSTRG.23587; |
| 3 StringTie exon      | 5039318   | 5039364   | . | - | . | transcript_MSTRG.23587.lgene_id | MSTRG.23587; |
| 3 StringTie exon      | 5115975   | 5116873   | . | - | . | transcript_MSTRG.23587.lgene_id | MSTRG.23587; |
| 3 StringTie transcrip | 5104095   | 5145105   | . | - | . | transcript_MSTRG.23592.lgene_id | MSTRG.23592; |
| 3 StringTie exon      | 5104095   | 5104336   | . | - | . | transcript_MSTRG.23592.lgene_id | MSTRG.23592; |
| 3 StringTie exon      | 5144995   | 5145105   | . | - | . | transcript_MSTRG.23592.lgene_id | MSTRG.23592; |
| 3 StringTie transcrip | 5462559   | 5463263   | . | - | . | transcript_MSTRG.23581.lgene_id | MSTRG.23581; |
| 3 StringTie exon      | 5462559   | 5462985   | . | - | . | transcript_MSTRG.23581.lgene_id | MSTRG.23581; |
| 3 StringTie exon      | 5463245   | 5463263   | . | - | . | transcript_MSTRG.23581.lgene_id | MSTRG.23581; |
| 3 StringTie transcrip | 6265573   | 6296207   | . | - | . | transcript_MSTRG.23606.lgene_id | MSTRG.23606; |
| 3 StringTie exon      | 6265573   | 6265640   | . | - | . | transcript_MSTRG.23606.lgene_id | MSTRG.23606; |
| 3 StringTie exon      | 6295706   | 6295957   | . | - | . | transcript_MSTRG.23606.lgene_id | MSTRG.23606; |
| 3 StringTie exon      | 6296129   | 6296207   | . | - | . | transcript_MSTRG.23606.lgene_id | MSTRG.23606; |
| 3 StringTie transcrip | 8484021   | 8494347   | . | - | . | transcript_MSTRG.23704.lgene_id | MSTRG.23704; |
| 3 StringTie exon      | 8484021   | 8484297   | . | - | . | transcript_MSTRG.23704.lgene_id | MSTRG.23704; |
| 3 StringTie exon      | 8484907   | 8484994   | . | - | . | transcript_MSTRG.23704.lgene_id | MSTRG.23704; |
| 3 StringTie exon      | 8487888   | 8488058   | . | - | . | transcript_MSTRG.23704.lgene_id | MSTRG.23704; |
| 3 StringTie exon      | 8491163   | 8491288   | . | - | . | transcript_MSTRG.23704.lgene_id | MSTRG.23704; |
| 3 StringTie exon      | 8493798   | 8493938   | . | - | . | transcript_MSTRG.23704.lgene_id | MSTRG.23704; |
| 3 StringTie exon      | 8494260   | 8494347   | . | - | . | transcript_MSTRG.23704.lgene_id | MSTRG.23704; |
| 3 StringTie transcrip | 8484021   | 8494874   | . | - | . | transcript_MSTRG.23704.(gene_id | MSTRG.23704; |
| 3 StringTie exon      | 8484021   | 8484994   | . | - | . | transcript_MSTRG.23704.(gene_id | MSTRG.23704; |

|                        |          |            |     |                                 |              |
|------------------------|----------|------------|-----|---------------------------------|--------------|
| 3 StringTie exon       | 8487888  | 8488058 .  | - . | transcript_MSTRG.23704.†gene_id | MSTRG.23704; |
| 3 StringTie exon       | 8491163  | 8491288 .  | - . | transcript_MSTRG.23704.†gene_id | MSTRG.23704; |
| 3 StringTie exon       | 8492155  | 8492284 .  | - . | transcript_MSTRG.23704.†gene_id | MSTRG.23704; |
| 3 StringTie exon       | 8493759  | 8493938 .  | - . | transcript_MSTRG.23704.†gene_id | MSTRG.23704; |
| 3 StringTie exon       | 8494766  | 8494874 .  | - . | transcript_MSTRG.23704.†gene_id | MSTRG.23704; |
| 3 StringTie transcript | 8484021  | 8494874 .  | - . | transcript_MSTRG.23704.‡gene_id | MSTRG.23704; |
| 3 StringTie exon       | 8484021  | 8484994 .  | - . | transcript_MSTRG.23704.‡gene_id | MSTRG.23704; |
| 3 StringTie exon       | 8487888  | 8488058 .  | - . | transcript_MSTRG.23704.‡gene_id | MSTRG.23704; |
| 3 StringTie exon       | 8491163  | 8491288 .  | - . | transcript_MSTRG.23704.‡gene_id | MSTRG.23704; |
| 3 StringTie exon       | 8493798  | 8493938 .  | - . | transcript_MSTRG.23704.‡gene_id | MSTRG.23704; |
| 3 StringTie exon       | 8494766  | 8494874 .  | - . | transcript_MSTRG.23704.‡gene_id | MSTRG.23704; |
| 3 StringTie transcript | 8484021  | 8494874 .  | - . | transcript_MSTRG.23704.‡gene_id | MSTRG.23704; |
| 3 StringTie exon       | 8484021  | 8484297 .  | - . | transcript_MSTRG.23704.‡gene_id | MSTRG.23704; |
| 3 StringTie exon       | 8484907  | 8485275 .  | - . | transcript_MSTRG.23704.‡gene_id | MSTRG.23704; |
| 3 StringTie exon       | 8487888  | 8488058 .  | - . | transcript_MSTRG.23704.‡gene_id | MSTRG.23704; |
| 3 StringTie exon       | 8491163  | 8491288 .  | - . | transcript_MSTRG.23704.‡gene_id | MSTRG.23704; |
| 3 StringTie exon       | 8492155  | 8492284 .  | - . | transcript_MSTRG.23704.‡gene_id | MSTRG.23704; |
| 3 StringTie exon       | 8493798  | 8493938 .  | - . | transcript_MSTRG.23704.‡gene_id | MSTRG.23704; |
| 3 StringTie exon       | 8494766  | 8494874 .  | - . | transcript_MSTRG.23704.‡gene_id | MSTRG.23704; |
| 3 StringTie transcript | 9644597  | 9660698 .  | - . | transcript_MSTRG.23733.‡gene_id | MSTRG.23733; |
| 3 StringTie exon       | 9644597  | 9653248 .  | - . | transcript_MSTRG.23733.‡gene_id | MSTRG.23733; |
| 3 StringTie exon       | 9656257  | 9656352 .  | - . | transcript_MSTRG.23733.‡gene_id | MSTRG.23733; |
| 3 StringTie exon       | 9660495  | 9660698 .  | - . | transcript_MSTRG.23733.‡gene_id | MSTRG.23733; |
| 3 StringTie transcript | 10738582 | 10740699 . | - . | transcript_MSTRG.23763.‡gene_id | MSTRG.23763; |
| 3 StringTie exon       | 10738582 | 10738839 . | - . | transcript_MSTRG.23763.‡gene_id | MSTRG.23763; |
| 3 StringTie exon       | 10740556 | 10740699 . | - . | transcript_MSTRG.23763.‡gene_id | MSTRG.23763; |
| 3 StringTie transcript | 16789321 | 16812394 . | - . | transcript_MSTRG.23889.‡gene_id | MSTRG.23889; |
| 3 StringTie exon       | 16789321 | 16789848 . | - . | transcript_MSTRG.23889.‡gene_id | MSTRG.23889; |
| 3 StringTie exon       | 16790736 | 16790834 . | - . | transcript_MSTRG.23889.‡gene_id | MSTRG.23889; |
| 3 StringTie exon       | 16803175 | 16803341 . | - . | transcript_MSTRG.23889.‡gene_id | MSTRG.23889; |
| 3 StringTie exon       | 16812179 | 16812394 . | - . | transcript_MSTRG.23889.‡gene_id | MSTRG.23889; |
| 3 StringTie transcript | 16790736 | 16812286 . | - . | transcript_MSTRG.23889.†gene_id | MSTRG.23889; |
| 3 StringTie exon       | 16790736 | 16790834 . | - . | transcript_MSTRG.23889.†gene_id | MSTRG.23889; |
| 3 StringTie exon       | 16812179 | 16812286 . | - . | transcript_MSTRG.23889.†gene_id | MSTRG.23889; |
| 3 StringTie transcript | 16802180 | 16802993 . | - . | transcript_MSTRG.23890.‡gene_id | MSTRG.23890; |

|                       |          |          |   |   |   |                                 |              |
|-----------------------|----------|----------|---|---|---|---------------------------------|--------------|
| 3 StringTie exon      | 16802180 | 16802474 | . | - | . | transcript_MSTRG.23890.lgene_id | MSTRG.23890; |
| 3 StringTie exon      | 16802973 | 16802993 | . | - | . | transcript_MSTRG.23890.lgene_id | MSTRG.23890; |
| 3 StringTie transcrip | 17556266 | 17559085 | . | - | . | transcript_MSTRG.23951.lgene_id | MSTRG.23951; |
| 3 StringTie exon      | 17556266 | 17556671 | . | - | . | transcript_MSTRG.23951.lgene_id | MSTRG.23951; |
| 3 StringTie exon      | 17556923 | 17557106 | . | - | . | transcript_MSTRG.23951.lgene_id | MSTRG.23951; |
| 3 StringTie exon      | 17559010 | 17559085 | . | - | . | transcript_MSTRG.23951.lgene_id | MSTRG.23951; |
| 3 StringTie transcrip | 17585836 | 17604052 | . | - | . | transcript_MSTRG.23955.lgene_id | MSTRG.23955; |
| 3 StringTie exon      | 17585836 | 17589766 | . | - | . | transcript_MSTRG.23955.lgene_id | MSTRG.23955; |
| 3 StringTie exon      | 17594310 | 17594509 | . | - | . | transcript_MSTRG.23955.lgene_id | MSTRG.23955; |
| 3 StringTie exon      | 17603781 | 17604052 | . | - | . | transcript_MSTRG.23955.lgene_id | MSTRG.23955; |
| 3 StringTie transcrip | 18500840 | 18507347 | . | - | . | transcript_MSTRG.24036.lgene_id | MSTRG.24036; |
| 3 StringTie exon      | 18500840 | 18501111 | . | - | . | transcript_MSTRG.24036.lgene_id | MSTRG.24036; |
| 3 StringTie exon      | 18507257 | 18507347 | . | - | . | transcript_MSTRG.24036.lgene_id | MSTRG.24036; |
| 3 StringTie transcrip | 23799238 | 23802719 | . | - | . | transcript_MSTRG.24099.lgene_id | MSTRG.24099; |
| 3 StringTie exon      | 23799238 | 23799445 | . | - | . | transcript_MSTRG.24099.lgene_id | MSTRG.24099; |
| 3 StringTie exon      | 23802573 | 23802719 | . | - | . | transcript_MSTRG.24099.lgene_id | MSTRG.24099; |
| 3 StringTie transcrip | 28739641 | 28743098 | . | - | . | transcript_MSTRG.24197.lgene_id | MSTRG.24197; |
| 3 StringTie exon      | 28739641 | 28739716 | . | - | . | transcript_MSTRG.24197.lgene_id | MSTRG.24197; |
| 3 StringTie exon      | 28740044 | 28740133 | . | - | . | transcript_MSTRG.24197.lgene_id | MSTRG.24197; |
| 3 StringTie exon      | 28740406 | 28740519 | . | - | . | transcript_MSTRG.24197.lgene_id | MSTRG.24197; |
| 3 StringTie exon      | 28742998 | 28743098 | . | - | . | transcript_MSTRG.24197.lgene_id | MSTRG.24197; |
| 3 StringTie transcrip | 31324344 | 31332384 | . | - | . | transcript_MSTRG.24223.lgene_id | MSTRG.24223; |
| 3 StringTie exon      | 31324344 | 31326131 | . | - | . | transcript_MSTRG.24223.lgene_id | MSTRG.24223; |
| 3 StringTie exon      | 31330873 | 31330981 | . | - | . | transcript_MSTRG.24223.lgene_id | MSTRG.24223; |
| 3 StringTie exon      | 31332362 | 31332384 | . | - | . | transcript_MSTRG.24223.lgene_id | MSTRG.24223; |
| 3 StringTie transcrip | 31324667 | 31326035 | . | - | . | transcript_MSTRG.24223.lgene_id | MSTRG.24223; |
| 3 StringTie exon      | 31324667 | 31325572 | . | - | . | transcript_MSTRG.24223.lgene_id | MSTRG.24223; |
| 3 StringTie exon      | 31325879 | 31326035 | . | - | . | transcript_MSTRG.24223.lgene_id | MSTRG.24223; |
| 3 StringTie transcrip | 38084956 | 38088744 | . | - | . | transcript_MSTRG.24302.lgene_id | MSTRG.24302; |
| 3 StringTie exon      | 38084956 | 38086332 | . | - | . | transcript_MSTRG.24302.lgene_id | MSTRG.24302; |
| 3 StringTie exon      | 38086680 | 38088744 | . | - | . | transcript_MSTRG.24302.lgene_id | MSTRG.24302; |
| 3 StringTie transcrip | 38782798 | 38789693 | . | - | . | transcript_MSTRG.24321.lgene_id | MSTRG.24321; |
| 3 StringTie exon      | 38782798 | 38783855 | . | - | . | transcript_MSTRG.24321.lgene_id | MSTRG.24321; |
| 3 StringTie exon      | 38789673 | 38789693 | . | - | . | transcript_MSTRG.24321.lgene_id | MSTRG.24321; |
| 3 StringTie transcrip | 39624688 | 39626094 | . | - | . | transcript_MSTRG.24377.lgene_id | MSTRG.24377; |



|                       |          |            |     |                                 |              |
|-----------------------|----------|------------|-----|---------------------------------|--------------|
| 3 StringTie exon      | 39624688 | 39624734 . | - . | transcript_MSTRG.24377.lgene_id | MSTRG.24377; |
| 3 StringTie exon      | 39625634 | 39625756 . | - . | transcript_MSTRG.24377.lgene_id | MSTRG.24377; |
| 3 StringTie exon      | 39626048 | 39626094 . | - . | transcript_MSTRG.24377.lgene_id | MSTRG.24377; |
| 3 StringTie transcrip | 40170167 | 40172364 . | - . | transcript_MSTRG.24429.lgene_id | MSTRG.24429; |
| 3 StringTie exon      | 40170167 | 40170493 . | - . | transcript_MSTRG.24429.lgene_id | MSTRG.24429; |
| 3 StringTie exon      | 40172127 | 40172364 . | - . | transcript_MSTRG.24429.lgene_id | MSTRG.24429; |
| 3 StringTie transcrip | 40931972 | 40956077 . | - . | transcript_MSTRG.24467.lgene_id | MSTRG.24467; |
| 3 StringTie exon      | 40931972 | 40935319 . | - . | transcript_MSTRG.24467.lgene_id | MSTRG.24467; |
| 3 StringTie exon      | 40946893 | 40947020 . | - . | transcript_MSTRG.24467.lgene_id | MSTRG.24467; |
| 3 StringTie exon      | 40954688 | 40954758 . | - . | transcript_MSTRG.24467.lgene_id | MSTRG.24467; |
| 3 StringTie exon      | 40955261 | 40955420 . | - . | transcript_MSTRG.24467.lgene_id | MSTRG.24467; |
| 3 StringTie exon      | 40955684 | 40956077 . | - . | transcript_MSTRG.24467.lgene_id | MSTRG.24467; |
| 3 StringTie transcrip | 41864618 | 41957527 . | - . | transcript_MSTRG.24523.lgene_id | MSTRG.24523; |
| 3 StringTie exon      | 41864618 | 41864668 . | - . | transcript_MSTRG.24523.lgene_id | MSTRG.24523; |
| 3 StringTie exon      | 41956353 | 41957527 . | - . | transcript_MSTRG.24523.lgene_id | MSTRG.24523; |
| 3 StringTie transcrip | 41880828 | 41957716 . | - . | transcript_MSTRG.24523.lgene_id | MSTRG.24523; |
| 3 StringTie exon      | 41880828 | 41880872 . | - . | transcript_MSTRG.24523.lgene_id | MSTRG.24523; |
| 3 StringTie exon      | 41956346 | 41957716 . | - . | transcript_MSTRG.24523.lgene_id | MSTRG.24523; |
| 3 StringTie transcrip | 42857790 | 42861300 . | - . | transcript_MSTRG.24546.lgene_id | MSTRG.24546; |
| 3 StringTie exon      | 42857790 | 42859467 . | - . | transcript_MSTRG.24546.lgene_id | MSTRG.24546; |
| 3 StringTie exon      | 42860670 | 42861300 . | - . | transcript_MSTRG.24546.lgene_id | MSTRG.24546; |
| 3 StringTie transcrip | 42978277 | 42987096 . | - . | transcript_MSTRG.24544.lgene_id | MSTRG.24544; |
| 3 StringTie exon      | 42978277 | 42979203 . | - . | transcript_MSTRG.24544.lgene_id | MSTRG.24544; |
| 3 StringTie exon      | 42981340 | 42981450 . | - . | transcript_MSTRG.24544.lgene_id | MSTRG.24544; |
| 3 StringTie exon      | 42987018 | 42987096 . | - . | transcript_MSTRG.24544.lgene_id | MSTRG.24544; |
| 3 StringTie transcrip | 47654641 | 47655028 . | - . | transcript_MSTRG.24689.lgene_id | MSTRG.24689; |
| 3 StringTie exon      | 47654641 | 47654700 . | - . | transcript_MSTRG.24689.lgene_id | MSTRG.24689; |
| 3 StringTie exon      | 47654879 | 47655028 . | - . | transcript_MSTRG.24689.lgene_id | MSTRG.24689; |
| 3 StringTie transcrip | 58206338 | 58206841 . | - . | transcript_MSTRG.24865.lgene_id | MSTRG.24865; |
| 3 StringTie exon      | 58206338 | 58206514 . | - . | transcript_MSTRG.24865.lgene_id | MSTRG.24865; |
| 3 StringTie exon      | 58206732 | 58206841 . | - . | transcript_MSTRG.24865.lgene_id | MSTRG.24865; |
| 3 StringTie transcrip | 68071222 | 68074095 . | - . | transcript_MSTRG.24980.lgene_id | MSTRG.24980; |
| 3 StringTie exon      | 68071222 | 68071434 . | - . | transcript_MSTRG.24980.lgene_id | MSTRG.24980; |
| 3 StringTie exon      | 68074034 | 68074095 . | - . | transcript_MSTRG.24980.lgene_id | MSTRG.24980; |
| 3 StringTie transcrip | 69702082 | 69702886 . | - . | transcript_MSTRG.25045.lgene_id | MSTRG.25045; |

|                        |           |           |   |   |   |                                 |              |
|------------------------|-----------|-----------|---|---|---|---------------------------------|--------------|
| 3 StringTie exon       | 69702082  | 69702303  | . | - | . | transcript_MSTRG.25045.lgene_id | MSTRG.25045; |
| 3 StringTie exon       | 69702774  | 69702886  | . | - | . | transcript_MSTRG.25045.lgene_id | MSTRG.25045; |
| 3 StringTie transcript | 72769581  | 72772322  | . | - | . | transcript_MSTRG.25108.lgene_id | MSTRG.25108; |
| 3 StringTie exon       | 72769581  | 72769799  | . | - | . | transcript_MSTRG.25108.lgene_id | MSTRG.25108; |
| 3 StringTie exon       | 72772197  | 72772322  | . | - | . | transcript_MSTRG.25108.lgene_id | MSTRG.25108; |
| 3 StringTie transcript | 79991716  | 80033945  | . | - | . | transcript_MSTRG.25275.lgene_id | MSTRG.25275; |
| 3 StringTie exon       | 79991716  | 79993340  | . | - | . | transcript_MSTRG.25275.lgene_id | MSTRG.25275; |
| 3 StringTie exon       | 80019192  | 80019244  | . | - | . | transcript_MSTRG.25275.lgene_id | MSTRG.25275; |
| 3 StringTie exon       | 80028090  | 80028166  | . | - | . | transcript_MSTRG.25275.lgene_id | MSTRG.25275; |
| 3 StringTie exon       | 80033880  | 80033945  | . | - | . | transcript_MSTRG.25275.lgene_id | MSTRG.25275; |
| 3 StringTie transcript | 80030842  | 80034478  | . | - | . | transcript_MSTRG.25276.lgene_id | MSTRG.25276; |
| 3 StringTie exon       | 80030842  | 80031336  | . | - | . | transcript_MSTRG.25276.lgene_id | MSTRG.25276; |
| 3 StringTie exon       | 80034161  | 80034478  | . | - | . | transcript_MSTRG.25276.lgene_id | MSTRG.25276; |
| 3 StringTie transcript | 85265117  | 85335671  | . | - | . | transcript_MSTRG.25319.lgene_id | MSTRG.25319; |
| 3 StringTie exon       | 85265117  | 85265366  | . | - | . | transcript_MSTRG.25319.lgene_id | MSTRG.25319; |
| 3 StringTie exon       | 85335583  | 85335671  | . | - | . | transcript_MSTRG.25319.lgene_id | MSTRG.25319; |
| 3 StringTie transcript | 92704343  | 92717698  | . | - | . | transcript_MSTRG.25424.lgene_id | MSTRG.25424; |
| 3 StringTie exon       | 92704343  | 92704371  | . | - | . | transcript_MSTRG.25424.lgene_id | MSTRG.25424; |
| 3 StringTie exon       | 92713361  | 92717698  | . | - | . | transcript_MSTRG.25424.lgene_id | MSTRG.25424; |
| 3 StringTie transcript | 92704343  | 92803272  | . | - | . | transcript_MSTRG.25424.lgene_id | MSTRG.25424; |
| 3 StringTie exon       | 92704343  | 92704371  | . | - | . | transcript_MSTRG.25424.lgene_id | MSTRG.25424; |
| 3 StringTie exon       | 92802913  | 92803272  | . | - | . | transcript_MSTRG.25424.lgene_id | MSTRG.25424; |
| 3 StringTie transcript | 93564738  | 93573296  | . | - | . | transcript_MSTRG.25431.lgene_id | MSTRG.25431; |
| 3 StringTie exon       | 93564738  | 93564754  | . | - | . | transcript_MSTRG.25431.lgene_id | MSTRG.25431; |
| 3 StringTie exon       | 93573090  | 93573296  | . | - | . | transcript_MSTRG.25431.lgene_id | MSTRG.25431; |
| 3 StringTie transcript | 111347433 | 111351484 | . | - | . | transcript_MSTRG.25717.lgene_id | MSTRG.25717; |
| 3 StringTie exon       | 111347433 | 111347485 | . | - | . | transcript_MSTRG.25717.lgene_id | MSTRG.25717; |
| 3 StringTie exon       | 111350542 | 111351484 | . | - | . | transcript_MSTRG.25717.lgene_id | MSTRG.25717; |
| 3 StringTie transcript | 111930026 | 111930362 | . | - | . | transcript_MSTRG.25763.lgene_id | MSTRG.25763; |
| 3 StringTie exon       | 111930026 | 111930134 | . | - | . | transcript_MSTRG.25763.lgene_id | MSTRG.25763; |
| 3 StringTie exon       | 111930252 | 111930362 | . | - | . | transcript_MSTRG.25763.lgene_id | MSTRG.25763; |
| 3 StringTie transcript | 114275242 | 114311997 | . | - | . | transcript_MSTRG.25815.lgene_id | MSTRG.25815; |
| 3 StringTie exon       | 114275242 | 114275873 | . | - | . | transcript_MSTRG.25815.lgene_id | MSTRG.25815; |
| 3 StringTie exon       | 114280516 | 114280643 | . | - | . | transcript_MSTRG.25815.lgene_id | MSTRG.25815; |
| 3 StringTie exon       | 114284033 | 114284074 | . | - | . | transcript_MSTRG.25815.lgene_id | MSTRG.25815; |

|                       |           |           |   |   |   |                                 |              |
|-----------------------|-----------|-----------|---|---|---|---------------------------------|--------------|
| 3 StringTie exon      | 114311977 | 114311997 | . | - | . | transcript_MSTRG.25815.lgene_id | MSTRG.25815; |
| 3 StringTie transcrip | 120868281 | 120869536 | . | - | . | transcript_MSTRG.25925.lgene_id | MSTRG.25925; |
| 3 StringTie exon      | 120868281 | 120868928 | . | - | . | transcript_MSTRG.25925.lgene_id | MSTRG.25925; |
| 3 StringTie exon      | 120869424 | 120869536 | . | - | . | transcript_MSTRG.25925.lgene_id | MSTRG.25925; |
| 3 StringTie transcrip | 124457909 | 124461094 | . | - | . | transcript_MSTRG.25941.lgene_id | MSTRG.25941; |
| 3 StringTie exon      | 124457909 | 124459343 | . | - | . | transcript_MSTRG.25941.lgene_id | MSTRG.25941; |
| 3 StringTie exon      | 124460978 | 124461094 | . | - | . | transcript_MSTRG.25941.lgene_id | MSTRG.25941; |
| 3 StringTie transcrip | 127869858 | 127874239 | . | - | . | transcript_MSTRG.25995.lgene_id | MSTRG.25995; |
| 3 StringTie exon      | 127869858 | 127870152 | . | - | . | transcript_MSTRG.25995.lgene_id | MSTRG.25995; |
| 3 StringTie exon      | 127870991 | 127871133 | . | - | . | transcript_MSTRG.25995.lgene_id | MSTRG.25995; |
| 3 StringTie exon      | 127874148 | 127874239 | . | - | . | transcript_MSTRG.25995.lgene_id | MSTRG.25995; |
| 4 StringTie transcrip | 1592968   | 1595232   | . | + | . | transcript_MSTRG.26148.lgene_id | MSTRG.26148; |
| 4 StringTie exon      | 1592968   | 1593049   | . | + | . | transcript_MSTRG.26148.lgene_id | MSTRG.26148; |
| 4 StringTie exon      | 1594666   | 1595232   | . | + | . | transcript_MSTRG.26148.lgene_id | MSTRG.26148; |
| 4 StringTie transcrip | 2635321   | 2641645   | . | + | . | transcript_MSTRG.26164.lgene_id | MSTRG.26164; |
| 4 StringTie exon      | 2635321   | 2635875   | . | + | . | transcript_MSTRG.26164.lgene_id | MSTRG.26164; |
| 4 StringTie exon      | 2636850   | 2637051   | . | + | . | transcript_MSTRG.26164.lgene_id | MSTRG.26164; |
| 4 StringTie exon      | 2637394   | 2641645   | . | + | . | transcript_MSTRG.26164.lgene_id | MSTRG.26164; |
| 4 StringTie transcrip | 7372566   | 7373247   | . | + | . | transcript_MSTRG.26194.lgene_id | MSTRG.26194; |
| 4 StringTie exon      | 7372566   | 7372627   | . | + | . | transcript_MSTRG.26194.lgene_id | MSTRG.26194; |
| 4 StringTie exon      | 7372958   | 7373247   | . | + | . | transcript_MSTRG.26194.lgene_id | MSTRG.26194; |
| 4 StringTie transcrip | 14402984  | 14403905  | . | + | . | transcript_MSTRG.26238.lgene_id | MSTRG.26238; |
| 4 StringTie exon      | 14402984  | 14403463  | . | + | . | transcript_MSTRG.26238.lgene_id | MSTRG.26238; |
| 4 StringTie exon      | 14403873  | 14403905  | . | + | . | transcript_MSTRG.26238.lgene_id | MSTRG.26238; |
| 4 StringTie transcrip | 15396200  | 15397224  | . | + | . | transcript_MSTRG.26294.lgene_id | MSTRG.26294; |
| 4 StringTie exon      | 15396200  | 15396389  | . | + | . | transcript_MSTRG.26294.lgene_id | MSTRG.26294; |
| 4 StringTie exon      | 15396593  | 15396703  | . | + | . | transcript_MSTRG.26294.lgene_id | MSTRG.26294; |
| 4 StringTie exon      | 15396916  | 15397224  | . | + | . | transcript_MSTRG.26294.lgene_id | MSTRG.26294; |
| 4 StringTie transcrip | 17192373  | 17281592  | . | + | . | transcript_MSTRG.26349.lgene_id | MSTRG.26349; |
| 4 StringTie exon      | 17192373  | 17192550  | . | + | . | transcript_MSTRG.26349.lgene_id | MSTRG.26349; |
| 4 StringTie exon      | 17279705  | 17279823  | . | + | . | transcript_MSTRG.26349.lgene_id | MSTRG.26349; |
| 4 StringTie exon      | 17281182  | 17281592  | . | + | . | transcript_MSTRG.26349.lgene_id | MSTRG.26349; |
| 4 StringTie transcrip | 29088411  | 29164887  | . | + | . | transcript_MSTRG.26506.lgene_id | MSTRG.26506; |
| 4 StringTie exon      | 29088411  | 29088487  | . | + | . | transcript_MSTRG.26506.lgene_id | MSTRG.26506; |
| 4 StringTie exon      | 29164225  | 29164384  | . | + | . | transcript_MSTRG.26506.lgene_id | MSTRG.26506; |

|                       |          |          |   |   |   |                                 |              |
|-----------------------|----------|----------|---|---|---|---------------------------------|--------------|
| 4 StringTie exon      | 29164774 | 29164887 | . | + | . | transcript_MSTRG.26506.lgene_id | MSTRG.26506; |
| 4 StringTie transcrip | 30277717 | 30491337 | . | + | . | transcript_MSTRG.26518.lgene_id | MSTRG.26518; |
| 4 StringTie exon      | 30277717 | 30277840 | . | + | . | transcript_MSTRG.26518.lgene_id | MSTRG.26518; |
| 4 StringTie exon      | 30277969 | 30278076 | . | + | . | transcript_MSTRG.26518.lgene_id | MSTRG.26518; |
| 4 StringTie exon      | 30297124 | 30297191 | . | + | . | transcript_MSTRG.26518.lgene_id | MSTRG.26518; |
| 4 StringTie exon      | 30399078 | 30399394 | . | + | . | transcript_MSTRG.26518.lgene_id | MSTRG.26518; |
| 4 StringTie exon      | 30491085 | 30491337 | . | + | . | transcript_MSTRG.26518.lgene_id | MSTRG.26518; |
| 4 StringTie transcrip | 30277980 | 30522672 | . | + | . | transcript_MSTRG.26518.lgene_id | MSTRG.26518; |
| 4 StringTie exon      | 30277980 | 30278076 | . | + | . | transcript_MSTRG.26518.lgene_id | MSTRG.26518; |
| 4 StringTie exon      | 30317117 | 30317213 | . | + | . | transcript_MSTRG.26518.lgene_id | MSTRG.26518; |
| 4 StringTie exon      | 30399078 | 30399394 | . | + | . | transcript_MSTRG.26518.lgene_id | MSTRG.26518; |
| 4 StringTie exon      | 30494321 | 30494414 | . | + | . | transcript_MSTRG.26518.lgene_id | MSTRG.26518; |
| 4 StringTie exon      | 30522417 | 30522672 | . | + | . | transcript_MSTRG.26518.lgene_id | MSTRG.26518; |
| 4 StringTie transcrip | 30875374 | 30952439 | . | + | . | transcript_MSTRG.26525.lgene_id | MSTRG.26525; |
| 4 StringTie exon      | 30875374 | 30875545 | . | + | . | transcript_MSTRG.26525.lgene_id | MSTRG.26525; |
| 4 StringTie exon      | 30882299 | 30882381 | . | + | . | transcript_MSTRG.26525.lgene_id | MSTRG.26525; |
| 4 StringTie exon      | 30952345 | 30952439 | . | + | . | transcript_MSTRG.26525.lgene_id | MSTRG.26525; |
| 4 StringTie transcrip | 30953243 | 30959437 | . | + | . | transcript_MSTRG.26526.lgene_id | MSTRG.26526; |
| 4 StringTie exon      | 30953243 | 30953269 | . | + | . | transcript_MSTRG.26526.lgene_id | MSTRG.26526; |
| 4 StringTie exon      | 30959046 | 30959437 | . | + | . | transcript_MSTRG.26526.lgene_id | MSTRG.26526; |
| 4 StringTie transcrip | 36744626 | 36748061 | . | + | . | transcript_MSTRG.26655.lgene_id | MSTRG.26655; |
| 4 StringTie exon      | 36744626 | 36745809 | . | + | . | transcript_MSTRG.26655.lgene_id | MSTRG.26655; |
| 4 StringTie exon      | 36745996 | 36746141 | . | + | . | transcript_MSTRG.26655.lgene_id | MSTRG.26655; |
| 4 StringTie exon      | 36747960 | 36748061 | . | + | . | transcript_MSTRG.26655.lgene_id | MSTRG.26655; |
| 4 StringTie transcrip | 41665422 | 41666932 | . | + | . | transcript_MSTRG.26726.lgene_id | MSTRG.26726; |
| 4 StringTie exon      | 41665422 | 41665601 | . | + | . | transcript_MSTRG.26726.lgene_id | MSTRG.26726; |
| 4 StringTie exon      | 41666036 | 41666932 | . | + | . | transcript_MSTRG.26726.lgene_id | MSTRG.26726; |
| 4 StringTie transcrip | 41918417 | 41925610 | . | + | . | transcript_MSTRG.26730.lgene_id | MSTRG.26730; |
| 4 StringTie exon      | 41918417 | 41918476 | . | + | . | transcript_MSTRG.26730.lgene_id | MSTRG.26730; |
| 4 StringTie exon      | 41921505 | 41925610 | . | + | . | transcript_MSTRG.26730.lgene_id | MSTRG.26730; |
| 4 StringTie transcrip | 42658580 | 42665764 | . | + | . | transcript_MSTRG.26738.lgene_id | MSTRG.26738; |
| 4 StringTie exon      | 42658580 | 42659007 | . | + | . | transcript_MSTRG.26738.lgene_id | MSTRG.26738; |
| 4 StringTie exon      | 42665739 | 42665764 | . | + | . | transcript_MSTRG.26738.lgene_id | MSTRG.26738; |
| 4 StringTie transcrip | 45793523 | 45795979 | . | + | . | transcript_MSTRG.26800.lgene_id | MSTRG.26800; |
| 4 StringTie exon      | 45793523 | 45793655 | . | + | . | transcript_MSTRG.26800.lgene_id | MSTRG.26800; |

|                        |          |          |   |   |   |                                 |              |
|------------------------|----------|----------|---|---|---|---------------------------------|--------------|
| 4 StringTie exon       | 45793769 | 45794562 | . | + | . | transcript_MSTRG.26800.¿gene_id | MSTRG.26800; |
| 4 StringTie exon       | 45794583 | 45795979 | . | + | . | transcript_MSTRG.26800.¿gene_id | MSTRG.26800; |
| 4 StringTie transcript | 45793523 | 45796112 | . | + | . | transcript_MSTRG.26800.¿gene_id | MSTRG.26800; |
| 4 StringTie exon       | 45793523 | 45793655 | . | + | . | transcript_MSTRG.26800.¿gene_id | MSTRG.26800; |
| 4 StringTie exon       | 45793769 | 45796112 | . | + | . | transcript_MSTRG.26800.¿gene_id | MSTRG.26800; |
| 4 StringTie transcript | 45793523 | 45804129 | . | + | . | transcript_MSTRG.26800.¿gene_id | MSTRG.26800; |
| 4 StringTie exon       | 45793523 | 45793655 | . | + | . | transcript_MSTRG.26800.¿gene_id | MSTRG.26800; |
| 4 StringTie exon       | 45803972 | 45804129 | . | + | . | transcript_MSTRG.26800.¿gene_id | MSTRG.26800; |
| 4 StringTie transcript | 53903890 | 53954298 | . | + | . | transcript_MSTRG.26863.¿gene_id | MSTRG.26863; |
| 4 StringTie exon       | 53903890 | 53903906 | . | + | . | transcript_MSTRG.26863.¿gene_id | MSTRG.26863; |
| 4 StringTie exon       | 53953609 | 53954298 | . | + | . | transcript_MSTRG.26863.¿gene_id | MSTRG.26863; |
| 4 StringTie transcript | 70928896 | 70933668 | . | + | . | transcript_MSTRG.27113.¿gene_id | MSTRG.27113; |
| 4 StringTie exon       | 70928896 | 70929135 | . | + | . | transcript_MSTRG.27113.¿gene_id | MSTRG.27113; |
| 4 StringTie exon       | 70933461 | 70933668 | . | + | . | transcript_MSTRG.27113.¿gene_id | MSTRG.27113; |
| 4 StringTie transcript | 70928940 | 70941808 | . | + | . | transcript_MSTRG.27113.¿gene_id | MSTRG.27113; |
| 4 StringTie exon       | 70928940 | 70929456 | . | + | . | transcript_MSTRG.27113.¿gene_id | MSTRG.27113; |
| 4 StringTie exon       | 70933461 | 70941808 | . | + | . | transcript_MSTRG.27113.¿gene_id | MSTRG.27113; |
| 4 StringTie transcript | 72148130 | 72150953 | . | + | . | transcript_MSTRG.27128.¿gene_id | MSTRG.27128; |
| 4 StringTie exon       | 72148130 | 72148248 | . | + | . | transcript_MSTRG.27128.¿gene_id | MSTRG.27128; |
| 4 StringTie exon       | 72150670 | 72150953 | . | + | . | transcript_MSTRG.27128.¿gene_id | MSTRG.27128; |
| 4 StringTie transcript | 72326408 | 72332234 | . | + | . | transcript_MSTRG.27119.¿gene_id | MSTRG.27119; |
| 4 StringTie exon       | 72326408 | 72326456 | . | + | . | transcript_MSTRG.27119.¿gene_id | MSTRG.27119; |
| 4 StringTie exon       | 72331920 | 72332234 | . | + | . | transcript_MSTRG.27119.¿gene_id | MSTRG.27119; |
| 4 StringTie transcript | 72542203 | 72543586 | . | + | . | transcript_MSTRG.27122.¿gene_id | MSTRG.27122; |
| 4 StringTie exon       | 72542203 | 72542356 | . | + | . | transcript_MSTRG.27122.¿gene_id | MSTRG.27122; |
| 4 StringTie exon       | 72543185 | 72543586 | . | + | . | transcript_MSTRG.27122.¿gene_id | MSTRG.27122; |
| 4 StringTie transcript | 73297935 | 73303071 | . | + | . | transcript_MSTRG.27140.¿gene_id | MSTRG.27140; |
| 4 StringTie exon       | 73297935 | 73297960 | . | + | . | transcript_MSTRG.27140.¿gene_id | MSTRG.27140; |
| 4 StringTie exon       | 73302808 | 73303071 | . | + | . | transcript_MSTRG.27140.¿gene_id | MSTRG.27140; |
| 4 StringTie transcript | 74125201 | 74212951 | . | + | . | transcript_MSTRG.27141.¿gene_id | MSTRG.27141; |
| 4 StringTie exon       | 74125201 | 74125248 | . | + | . | transcript_MSTRG.27141.¿gene_id | MSTRG.27141; |
| 4 StringTie exon       | 74212762 | 74212951 | . | + | . | transcript_MSTRG.27141.¿gene_id | MSTRG.27141; |
| 4 StringTie transcript | 75959122 | 75978040 | . | + | . | transcript_MSTRG.27221.¿gene_id | MSTRG.27221; |
| 4 StringTie exon       | 75959122 | 75959139 | . | + | . | transcript_MSTRG.27221.¿gene_id | MSTRG.27221; |
| 4 StringTie exon       | 75977135 | 75978040 | . | + | . | transcript_MSTRG.27221.¿gene_id | MSTRG.27221; |

|                       |          |            |   |   |                                 |              |
|-----------------------|----------|------------|---|---|---------------------------------|--------------|
| 4 StringTie transcrip | 80190932 | 80204507 . | + | . | transcript_MSTRG.27284.lgene_id | MSTRG.27284; |
| 4 StringTie exon      | 80190932 | 80191094 . | + | . | transcript_MSTRG.27284.lgene_id | MSTRG.27284; |
| 4 StringTie exon      | 80204430 | 80204507 . | + | . | transcript_MSTRG.27284.lgene_id | MSTRG.27284; |
| 4 StringTie transcrip | 80190986 | 80451420 . | + | . | transcript_MSTRG.27284.lgene_id | MSTRG.27284; |
| 4 StringTie exon      | 80190986 | 80191094 . | + | . | transcript_MSTRG.27284.lgene_id | MSTRG.27284; |
| 4 StringTie exon      | 80295694 | 80295794 . | + | . | transcript_MSTRG.27284.lgene_id | MSTRG.27284; |
| 4 StringTie exon      | 80450832 | 80451420 . | + | . | transcript_MSTRG.27284.lgene_id | MSTRG.27284; |
| 4 StringTie transcrip | 80191051 | 80451676 . | + | . | transcript_MSTRG.27284.lgene_id | MSTRG.27284; |
| 4 StringTie exon      | 80191051 | 80191094 . | + | . | transcript_MSTRG.27284.lgene_id | MSTRG.27284; |
| 4 StringTie exon      | 80295691 | 80295794 . | + | . | transcript_MSTRG.27284.lgene_id | MSTRG.27284; |
| 4 StringTie exon      | 80450832 | 80451676 . | + | . | transcript_MSTRG.27284.lgene_id | MSTRG.27284; |
| 4 StringTie transcrip | 82794830 | 82800336 . | + | . | transcript_MSTRG.27333.lgene_id | MSTRG.27333; |
| 4 StringTie exon      | 82794830 | 82794952 . | + | . | transcript_MSTRG.27333.lgene_id | MSTRG.27333; |
| 4 StringTie exon      | 82799779 | 82800336 . | + | . | transcript_MSTRG.27333.lgene_id | MSTRG.27333; |
| 4 StringTie transcrip | 87194274 | 87246764 . | + | . | transcript_MSTRG.27437.lgene_id | MSTRG.27437; |
| 4 StringTie exon      | 87194274 | 87194512 . | + | . | transcript_MSTRG.27437.lgene_id | MSTRG.27437; |
| 4 StringTie exon      | 87246424 | 87246764 . | + | . | transcript_MSTRG.27437.lgene_id | MSTRG.27437; |
| 4 StringTie transcrip | 87722805 | 87756158 . | + | . | transcript_MSTRG.27449.lgene_id | MSTRG.27449; |
| 4 StringTie exon      | 87722805 | 87722819 . | + | . | transcript_MSTRG.27449.lgene_id | MSTRG.27449; |
| 4 StringTie exon      | 87751647 | 87756158 . | + | . | transcript_MSTRG.27449.lgene_id | MSTRG.27449; |
| 4 StringTie transcrip | 88965860 | 88968544 . | + | . | transcript_MSTRG.27473.lgene_id | MSTRG.27473; |
| 4 StringTie exon      | 88965860 | 88966455 . | + | . | transcript_MSTRG.27473.lgene_id | MSTRG.27473; |
| 4 StringTie exon      | 88968472 | 88968544 . | + | . | transcript_MSTRG.27473.lgene_id | MSTRG.27473; |
| 4 StringTie transcrip | 90721661 | 90773024 . | + | . | transcript_MSTRG.27534.lgene_id | MSTRG.27534; |
| 4 StringTie exon      | 90721661 | 90721723 . | + | . | transcript_MSTRG.27534.lgene_id | MSTRG.27534; |
| 4 StringTie exon      | 90722828 | 90722924 . | + | . | transcript_MSTRG.27534.lgene_id | MSTRG.27534; |
| 4 StringTie exon      | 90747558 | 90747687 . | + | . | transcript_MSTRG.27534.lgene_id | MSTRG.27534; |
| 4 StringTie exon      | 90772936 | 90773024 . | + | . | transcript_MSTRG.27534.lgene_id | MSTRG.27534; |
| 4 StringTie transcrip | 91402638 | 91432984 . | + | . | transcript_MSTRG.27569.lgene_id | MSTRG.27569; |
| 4 StringTie exon      | 91402638 | 91402757 . | + | . | transcript_MSTRG.27569.lgene_id | MSTRG.27569; |
| 4 StringTie exon      | 91425086 | 91425495 . | + | . | transcript_MSTRG.27569.lgene_id | MSTRG.27569; |
| 4 StringTie exon      | 91432664 | 91432984 . | + | . | transcript_MSTRG.27569.lgene_id | MSTRG.27569; |
| 4 StringTie transcrip | 91402640 | 91432986 . | + | . | transcript_MSTRG.27569.lgene_id | MSTRG.27569; |
| 4 StringTie exon      | 91402640 | 91402872 . | + | . | transcript_MSTRG.27569.lgene_id | MSTRG.27569; |
| 4 StringTie exon      | 91425086 | 91425472 . | + | . | transcript_MSTRG.27569.lgene_id | MSTRG.27569; |

|                       |           |           |   |   |   |                                 |              |
|-----------------------|-----------|-----------|---|---|---|---------------------------------|--------------|
| 4 StringTie exon      | 91432664  | 91432986  | . | + | . | transcript_MSTRG.27569.(gene_id | MSTRG.27569; |
| 4 StringTie transcrip | 91402641  | 91432984  | . | + | . | transcript_MSTRG.27569.(gene_id | MSTRG.27569; |
| 4 StringTie exon      | 91402641  | 91402872  | . | + | . | transcript_MSTRG.27569.(gene_id | MSTRG.27569; |
| 4 StringTie exon      | 91425086  | 91425495  | . | + | . | transcript_MSTRG.27569.(gene_id | MSTRG.27569; |
| 4 StringTie exon      | 91432664  | 91432984  | . | + | . | transcript_MSTRG.27569.(gene_id | MSTRG.27569; |
| 4 StringTie transcrip | 92178145  | 92178376  | . | + | . | transcript_MSTRG.27561.(gene_id | MSTRG.27561; |
| 4 StringTie exon      | 92178145  | 92178254  | . | + | . | transcript_MSTRG.27561.(gene_id | MSTRG.27561; |
| 4 StringTie exon      | 92178277  | 92178376  | . | + | . | transcript_MSTRG.27561.(gene_id | MSTRG.27561; |
| 4 StringTie transcrip | 94243388  | 94262062  | . | + | . | transcript_MSTRG.27645.(gene_id | MSTRG.27645; |
| 4 StringTie exon      | 94243388  | 94243415  | . | + | . | transcript_MSTRG.27645.(gene_id | MSTRG.27645; |
| 4 StringTie exon      | 94260062  | 94262062  | . | + | . | transcript_MSTRG.27645.(gene_id | MSTRG.27645; |
| 4 StringTie transcrip | 94496982  | 94500288  | . | + | . | transcript_MSTRG.27656.(gene_id | MSTRG.27656; |
| 4 StringTie exon      | 94496982  | 94497020  | . | + | . | transcript_MSTRG.27656.(gene_id | MSTRG.27656; |
| 4 StringTie exon      | 94497657  | 94497772  | . | + | . | transcript_MSTRG.27656.(gene_id | MSTRG.27656; |
| 4 StringTie exon      | 94500214  | 94500288  | . | + | . | transcript_MSTRG.27656.(gene_id | MSTRG.27656; |
| 4 StringTie transcrip | 94810916  | 94811715  | . | + | . | transcript_MSTRG.27679.(gene_id | MSTRG.27679; |
| 4 StringTie exon      | 94810916  | 94811025  | . | + | . | transcript_MSTRG.27679.(gene_id | MSTRG.27679; |
| 4 StringTie exon      | 94811522  | 94811715  | . | + | . | transcript_MSTRG.27679.(gene_id | MSTRG.27679; |
| 4 StringTie transcrip | 97319769  | 97322051  | . | + | . | transcript_MSTRG.27733.(gene_id | MSTRG.27733; |
| 4 StringTie exon      | 97319769  | 97320150  | . | + | . | transcript_MSTRG.27733.(gene_id | MSTRG.27733; |
| 4 StringTie exon      | 97321554  | 97322051  | . | + | . | transcript_MSTRG.27733.(gene_id | MSTRG.27733; |
| 4 StringTie transcrip | 97467400  | 97473561  | . | + | . | transcript_MSTRG.27749.(gene_id | MSTRG.27749; |
| 4 StringTie exon      | 97467400  | 97467421  | . | + | . | transcript_MSTRG.27749.(gene_id | MSTRG.27749; |
| 4 StringTie exon      | 97472225  | 97472410  | . | + | . | transcript_MSTRG.27749.(gene_id | MSTRG.27749; |
| 4 StringTie exon      | 97473046  | 97473561  | . | + | . | transcript_MSTRG.27749.(gene_id | MSTRG.27749; |
| 4 StringTie transcrip | 98771826  | 98772612  | . | + | . | transcript_MSTRG.27813.(gene_id | MSTRG.27813; |
| 4 StringTie exon      | 98771826  | 98772005  | . | + | . | transcript_MSTRG.27813.(gene_id | MSTRG.27813; |
| 4 StringTie exon      | 98772543  | 98772612  | . | + | . | transcript_MSTRG.27813.(gene_id | MSTRG.27813; |
| 4 StringTie transcrip | 99157337  | 99160883  | . | + | . | transcript_MSTRG.27836.(gene_id | MSTRG.27836; |
| 4 StringTie exon      | 99157337  | 99157544  | . | + | . | transcript_MSTRG.27836.(gene_id | MSTRG.27836; |
| 4 StringTie exon      | 99160745  | 99160883  | . | + | . | transcript_MSTRG.27836.(gene_id | MSTRG.27836; |
| 4 StringTie transcrip | 99711671  | 99723961  | . | + | . | transcript_MSTRG.27880.(gene_id | MSTRG.27880; |
| 4 StringTie exon      | 99711671  | 99712030  | . | + | . | transcript_MSTRG.27880.(gene_id | MSTRG.27880; |
| 4 StringTie exon      | 99723854  | 99723961  | . | + | . | transcript_MSTRG.27880.(gene_id | MSTRG.27880; |
| 4 StringTie transcrip | 100442763 | 100450897 | . | + | . | transcript_MSTRG.27891.(gene_id | MSTRG.27891; |

|                       |           |           |   |   |   |                         |         |              |
|-----------------------|-----------|-----------|---|---|---|-------------------------|---------|--------------|
| 4 StringTie exon      | 100442763 | 100442839 | . | + | . | transcript_MSTRG.27891. | gene_id | MSTRG.27891; |
| 4 StringTie exon      | 100446495 | 100446562 | . | + | . | transcript_MSTRG.27891. | gene_id | MSTRG.27891; |
| 4 StringTie exon      | 100448730 | 100449083 | . | + | . | transcript_MSTRG.27891. | gene_id | MSTRG.27891; |
| 4 StringTie exon      | 100450656 | 100450897 | . | + | . | transcript_MSTRG.27891. | gene_id | MSTRG.27891; |
| 4 StringTie transcrip | 100443753 | 100450871 | . | + | . | transcript_MSTRG.27891. | gene_id | MSTRG.27891; |
| 4 StringTie exon      | 100443753 | 100443809 | . | + | . | transcript_MSTRG.27891. | gene_id | MSTRG.27891; |
| 4 StringTie exon      | 100446495 | 100446562 | . | + | . | transcript_MSTRG.27891. | gene_id | MSTRG.27891; |
| 4 StringTie exon      | 100448730 | 100449293 | . | + | . | transcript_MSTRG.27891. | gene_id | MSTRG.27891; |
| 4 StringTie exon      | 100450681 | 100450871 | . | + | . | transcript_MSTRG.27891. | gene_id | MSTRG.27891; |
| 4 StringTie transcrip | 100906829 | 100933471 | . | + | . | transcript_MSTRG.27905. | gene_id | MSTRG.27905; |
| 4 StringTie exon      | 100906829 | 100910678 | . | + | . | transcript_MSTRG.27905. | gene_id | MSTRG.27905; |
| 4 StringTie exon      | 100932766 | 100933471 | . | + | . | transcript_MSTRG.27905. | gene_id | MSTRG.27905; |
| 4 StringTie transcrip | 110566229 | 110629231 | . | + | . | transcript_MSTRG.28190. | gene_id | MSTRG.28190; |
| 4 StringTie exon      | 110566229 | 110566245 | . | + | . | transcript_MSTRG.28190. | gene_id | MSTRG.28190; |
| 4 StringTie exon      | 110628538 | 110629231 | . | + | . | transcript_MSTRG.28190. | gene_id | MSTRG.28190; |
| 4 StringTie transcrip | 110658454 | 110661877 | . | + | . | transcript_MSTRG.28200. | gene_id | MSTRG.28200; |
| 4 StringTie exon      | 110658454 | 110661758 | . | + | . | transcript_MSTRG.28200. | gene_id | MSTRG.28200; |
| 4 StringTie exon      | 110661782 | 110661877 | . | + | . | transcript_MSTRG.28200. | gene_id | MSTRG.28200; |
| 4 StringTie transcrip | 110971589 | 110974519 | . | + | . | transcript_MSTRG.28206. | gene_id | MSTRG.28206; |
| 4 StringTie exon      | 110971589 | 110971740 | . | + | . | transcript_MSTRG.28206. | gene_id | MSTRG.28206; |
| 4 StringTie exon      | 110973988 | 110974519 | . | + | . | transcript_MSTRG.28206. | gene_id | MSTRG.28206; |
| 4 StringTie transcrip | 111627337 | 111629251 | . | + | . | transcript_MSTRG.28214. | gene_id | MSTRG.28214; |
| 4 StringTie exon      | 111627337 | 111627837 | . | + | . | transcript_MSTRG.28214. | gene_id | MSTRG.28214; |
| 4 StringTie exon      | 111628127 | 111629251 | . | + | . | transcript_MSTRG.28214. | gene_id | MSTRG.28214; |
| 4 StringTie transcrip | 117193027 | 117195167 | . | + | . | transcript_MSTRG.28270. | gene_id | MSTRG.28270; |
| 4 StringTie exon      | 117193027 | 117193565 | . | + | . | transcript_MSTRG.28270. | gene_id | MSTRG.28270; |
| 4 StringTie exon      | 117193889 | 117195167 | . | + | . | transcript_MSTRG.28270. | gene_id | MSTRG.28270; |
| 4 StringTie transcrip | 118090709 | 118092081 | . | + | . | transcript_MSTRG.28284. | gene_id | MSTRG.28284; |
| 4 StringTie exon      | 118090709 | 118091008 | . | + | . | transcript_MSTRG.28284. | gene_id | MSTRG.28284; |
| 4 StringTie exon      | 118091761 | 118092081 | . | + | . | transcript_MSTRG.28284. | gene_id | MSTRG.28284; |
| 4 StringTie transcrip | 118382879 | 118383174 | . | + | . | transcript_MSTRG.28310. | gene_id | MSTRG.28310; |
| 4 StringTie exon      | 118382879 | 118382989 | . | + | . | transcript_MSTRG.28310. | gene_id | MSTRG.28310; |
| 4 StringTie exon      | 118383064 | 118383174 | . | + | . | transcript_MSTRG.28310. | gene_id | MSTRG.28310; |
| 4 StringTie transcrip | 120737037 | 120764439 | . | + | . | transcript_MSTRG.28317. | gene_id | MSTRG.28317; |
| 4 StringTie exon      | 120737037 | 120737063 | . | + | . | transcript_MSTRG.28317. | gene_id | MSTRG.28317; |



|                       |           |           |   |   |   |                                 |              |
|-----------------------|-----------|-----------|---|---|---|---------------------------------|--------------|
| 4 StringTie exon      | 120764266 | 120764439 | . | + | . | transcript_MSTRG.28317.lgene_id | MSTRG.28317; |
| 4 StringTie transcrip | 123802453 | 123820199 | . | + | . | transcript_MSTRG.28384.lgene_id | MSTRG.28384; |
| 4 StringTie exon      | 123802453 | 123803067 | . | + | . | transcript_MSTRG.28384.lgene_id | MSTRG.28384; |
| 4 StringTie exon      | 123819361 | 123820199 | . | + | . | transcript_MSTRG.28384.lgene_id | MSTRG.28384; |
| 4 StringTie transcrip | 127042948 | 127045594 | . | + | . | transcript_MSTRG.28438.lgene_id | MSTRG.28438; |
| 4 StringTie exon      | 127042948 | 127043002 | . | + | . | transcript_MSTRG.28438.lgene_id | MSTRG.28438; |
| 4 StringTie exon      | 127043440 | 127045594 | . | + | . | transcript_MSTRG.28438.lgene_id | MSTRG.28438; |
| 4 StringTie transcrip | 153292    | 159099    | . | - | . | transcript_MSTRG.26044.lgene_id | MSTRG.26044; |
| 4 StringTie exon      | 153292    | 153976    | . | - | . | transcript_MSTRG.26044.lgene_id | MSTRG.26044; |
| 4 StringTie exon      | 157993    | 159099    | . | - | . | transcript_MSTRG.26044.lgene_id | MSTRG.26044; |
| 4 StringTie transcrip | 153301    | 159099    | . | - | . | transcript_MSTRG.26044.lgene_id | MSTRG.26044; |
| 4 StringTie exon      | 153301    | 153976    | . | - | . | transcript_MSTRG.26044.lgene_id | MSTRG.26044; |
| 4 StringTie exon      | 157993    | 158600    | . | - | . | transcript_MSTRG.26044.lgene_id | MSTRG.26044; |
| 4 StringTie exon      | 158761    | 159099    | . | - | . | transcript_MSTRG.26044.lgene_id | MSTRG.26044; |
| 4 StringTie transcrip | 153361    | 159087    | . | - | . | transcript_MSTRG.26044.lgene_id | MSTRG.26044; |
| 4 StringTie exon      | 153361    | 153976    | . | - | . | transcript_MSTRG.26044.lgene_id | MSTRG.26044; |
| 4 StringTie exon      | 157993    | 158603    | . | - | . | transcript_MSTRG.26044.lgene_id | MSTRG.26044; |
| 4 StringTie exon      | 158761    | 159087    | . | - | . | transcript_MSTRG.26044.lgene_id | MSTRG.26044; |
| 4 StringTie transcrip | 416362    | 418812    | . | - | . | transcript_MSTRG.26068.lgene_id | MSTRG.26068; |
| 4 StringTie exon      | 416362    | 416578    | . | - | . | transcript_MSTRG.26068.lgene_id | MSTRG.26068; |
| 4 StringTie exon      | 418541    | 418812    | . | - | . | transcript_MSTRG.26068.lgene_id | MSTRG.26068; |
| 4 StringTie transcrip | 747326    | 790164    | . | - | . | transcript_MSTRG.26126.lgene_id | MSTRG.26126; |
| 4 StringTie exon      | 747326    | 747436    | . | - | . | transcript_MSTRG.26126.lgene_id | MSTRG.26126; |
| 4 StringTie exon      | 790054    | 790164    | . | - | . | transcript_MSTRG.26126.lgene_id | MSTRG.26126; |
| 4 StringTie transcrip | 924566    | 925537    | . | - | . | transcript_MSTRG.26094.lgene_id | MSTRG.26094; |
| 4 StringTie exon      | 924566    | 925537    | . | - | . | transcript_MSTRG.26094.lgene_id | MSTRG.26094; |
| 4 StringTie transcrip | 924719    | 925537    | . | - | . | transcript_MSTRG.26094.lgene_id | MSTRG.26094; |
| 4 StringTie exon      | 924719    | 924872    | . | - | . | transcript_MSTRG.26094.lgene_id | MSTRG.26094; |
| 4 StringTie exon      | 924909    | 925537    | . | - | . | transcript_MSTRG.26094.lgene_id | MSTRG.26094; |
| 4 StringTie transcrip | 2018144   | 2021201   | . | - | . | transcript_MSTRG.26151.lgene_id | MSTRG.26151; |
| 4 StringTie exon      | 2018144   | 2018622   | . | - | . | transcript_MSTRG.26151.lgene_id | MSTRG.26151; |
| 4 StringTie exon      | 2020863   | 2021201   | . | - | . | transcript_MSTRG.26151.lgene_id | MSTRG.26151; |
| 4 StringTie transcrip | 8475335   | 8507321   | . | - | . | transcript_MSTRG.26210.lgene_id | MSTRG.26210; |
| 4 StringTie exon      | 8475335   | 8477437   | . | - | . | transcript_MSTRG.26210.lgene_id | MSTRG.26210; |
| 4 StringTie exon      | 8485561   | 8485979   | . | - | . | transcript_MSTRG.26210.lgene_id | MSTRG.26210; |

|                       |          |            |     |                                 |              |
|-----------------------|----------|------------|-----|---------------------------------|--------------|
| 4 StringTie exon      | 8494066  | 8494246 .  | - . | transcript_MSTRG.26210.¿gene_id | MSTRG.26210; |
| 4 StringTie exon      | 8507183  | 8507321 .  | - . | transcript_MSTRG.26210.¿gene_id | MSTRG.26210; |
| 4 StringTie transcrip | 8475335  | 8507321 .  | - . | transcript_MSTRG.26210.¿gene_id | MSTRG.26210; |
| 4 StringTie exon      | 8475335  | 8477437 .  | - . | transcript_MSTRG.26210.¿gene_id | MSTRG.26210; |
| 4 StringTie exon      | 8494066  | 8494246 .  | - . | transcript_MSTRG.26210.¿gene_id | MSTRG.26210; |
| 4 StringTie exon      | 8507183  | 8507321 .  | - . | transcript_MSTRG.26210.¿gene_id | MSTRG.26210; |
| 4 StringTie transcrip | 8506148  | 8506893 .  | - . | transcript_MSTRG.26210.¿gene_id | MSTRG.26210; |
| 4 StringTie exon      | 8506148  | 8506434 .  | - . | transcript_MSTRG.26210.¿gene_id | MSTRG.26210; |
| 4 StringTie exon      | 8506628  | 8506893 .  | - . | transcript_MSTRG.26210.¿gene_id | MSTRG.26210; |
| 4 StringTie transcrip | 8506148  | 8507302 .  | - . | transcript_MSTRG.26210.¿gene_id | MSTRG.26210; |
| 4 StringTie exon      | 8506148  | 8506434 .  | - . | transcript_MSTRG.26210.¿gene_id | MSTRG.26210; |
| 4 StringTie exon      | 8507183  | 8507302 .  | - . | transcript_MSTRG.26210.¿gene_id | MSTRG.26210; |
| 4 StringTie transcrip | 14788625 | 14825648 . | - . | transcript_MSTRG.26232.¿gene_id | MSTRG.26232; |
| 4 StringTie exon      | 14788625 | 14789092 . | - . | transcript_MSTRG.26232.¿gene_id | MSTRG.26232; |
| 4 StringTie exon      | 14818698 | 14818889 . | - . | transcript_MSTRG.26232.¿gene_id | MSTRG.26232; |
| 4 StringTie exon      | 14825618 | 14825648 . | - . | transcript_MSTRG.26232.¿gene_id | MSTRG.26232; |
| 4 StringTie transcrip | 15223157 | 15237666 . | - . | transcript_MSTRG.26295.¿gene_id | MSTRG.26295; |
| 4 StringTie exon      | 15223157 | 15223555 . | - . | transcript_MSTRG.26295.¿gene_id | MSTRG.26295; |
| 4 StringTie exon      | 15237572 | 15237666 . | - . | transcript_MSTRG.26295.¿gene_id | MSTRG.26295; |
| 4 StringTie transcrip | 15800674 | 15800908 . | - . | transcript_MSTRG.26311.¿gene_id | MSTRG.26311; |
| 4 StringTie exon      | 15800674 | 15800782 . | - . | transcript_MSTRG.26311.¿gene_id | MSTRG.26311; |
| 4 StringTie exon      | 15800803 | 15800908 . | - . | transcript_MSTRG.26311.¿gene_id | MSTRG.26311; |
| 4 StringTie transcrip | 16542352 | 16545650 . | - . | transcript_MSTRG.26337.¿gene_id | MSTRG.26337; |
| 4 StringTie exon      | 16542352 | 16544674 . | - . | transcript_MSTRG.26337.¿gene_id | MSTRG.26337; |
| 4 StringTie exon      | 16544696 | 16545650 . | - . | transcript_MSTRG.26337.¿gene_id | MSTRG.26337; |
| 4 StringTie transcrip | 22530959 | 22539446 . | - . | transcript_MSTRG.26426.¿gene_id | MSTRG.26426; |
| 4 StringTie exon      | 22530959 | 22532255 . | - . | transcript_MSTRG.26426.¿gene_id | MSTRG.26426; |
| 4 StringTie exon      | 22539283 | 22539446 . | - . | transcript_MSTRG.26426.¿gene_id | MSTRG.26426; |
| 4 StringTie transcrip | 28816403 | 28981234 . | - . | transcript_MSTRG.26499.¿gene_id | MSTRG.26499; |
| 4 StringTie exon      | 28816403 | 28816432 . | - . | transcript_MSTRG.26499.¿gene_id | MSTRG.26499; |
| 4 StringTie exon      | 28835461 | 28835646 . | - . | transcript_MSTRG.26499.¿gene_id | MSTRG.26499; |
| 4 StringTie exon      | 28981119 | 28981234 . | - . | transcript_MSTRG.26499.¿gene_id | MSTRG.26499; |
| 4 StringTie transcrip | 34328227 | 34332473 . | - . | transcript_MSTRG.26588.¿gene_id | MSTRG.26588; |
| 4 StringTie exon      | 34328227 | 34329154 . | - . | transcript_MSTRG.26588.¿gene_id | MSTRG.26588; |
| 4 StringTie exon      | 34332246 | 34332473 . | - . | transcript_MSTRG.26588.¿gene_id | MSTRG.26588; |

|                        |          |            |     |                                 |              |
|------------------------|----------|------------|-----|---------------------------------|--------------|
| 4 StringTie transcript | 34328971 | 34350281 . | - . | transcript_MSTRG.26588.¿gene_id | MSTRG.26588; |
| 4 StringTie exon       | 34328971 | 34329154 . | - . | transcript_MSTRG.26588.¿gene_id | MSTRG.26588; |
| 4 StringTie exon       | 34350152 | 34350281 . | - . | transcript_MSTRG.26588.¿gene_id | MSTRG.26588; |
| 4 StringTie transcript | 41428411 | 41455712 . | - . | transcript_MSTRG.26709.¿gene_id | MSTRG.26709; |
| 4 StringTie exon       | 41428411 | 41428999 . | - . | transcript_MSTRG.26709.¿gene_id | MSTRG.26709; |
| 4 StringTie exon       | 41452195 | 41452436 . | - . | transcript_MSTRG.26709.¿gene_id | MSTRG.26709; |
| 4 StringTie exon       | 41455651 | 41455712 . | - . | transcript_MSTRG.26709.¿gene_id | MSTRG.26709; |
| 4 StringTie transcript | 42788999 | 42813869 . | - . | transcript_MSTRG.26743.¿gene_id | MSTRG.26743; |
| 4 StringTie exon       | 42788999 | 42789028 . | - . | transcript_MSTRG.26743.¿gene_id | MSTRG.26743; |
| 4 StringTie exon       | 42795487 | 42795962 . | - . | transcript_MSTRG.26743.¿gene_id | MSTRG.26743; |
| 4 StringTie exon       | 42813437 | 42813869 . | - . | transcript_MSTRG.26743.¿gene_id | MSTRG.26743; |
| 4 StringTie transcript | 53869552 | 53954299 . | - . | transcript_MSTRG.26862.¿gene_id | MSTRG.26862; |
| 4 StringTie exon       | 53869552 | 53869603 . | - . | transcript_MSTRG.26862.¿gene_id | MSTRG.26862; |
| 4 StringTie exon       | 53953473 | 53954299 . | - . | transcript_MSTRG.26862.¿gene_id | MSTRG.26862; |
| 4 StringTie transcript | 55107799 | 55168079 . | - . | transcript_MSTRG.26887.¿gene_id | MSTRG.26887; |
| 4 StringTie exon       | 55107799 | 55107909 . | - . | transcript_MSTRG.26887.¿gene_id | MSTRG.26887; |
| 4 StringTie exon       | 55167608 | 55168079 . | - . | transcript_MSTRG.26887.¿gene_id | MSTRG.26887; |
| 4 StringTie transcript | 55157046 | 55168079 . | - . | transcript_MSTRG.26887.¿gene_id | MSTRG.26887; |
| 4 StringTie exon       | 55157046 | 55158093 . | - . | transcript_MSTRG.26887.¿gene_id | MSTRG.26887; |
| 4 StringTie exon       | 55167608 | 55168079 . | - . | transcript_MSTRG.26887.¿gene_id | MSTRG.26887; |
| 4 StringTie transcript | 55228484 | 55230047 . | - . | transcript_MSTRG.26885.¿gene_id | MSTRG.26885; |
| 4 StringTie exon       | 55228484 | 55228866 . | - . | transcript_MSTRG.26885.¿gene_id | MSTRG.26885; |
| 4 StringTie exon       | 55229899 | 55230047 . | - . | transcript_MSTRG.26885.¿gene_id | MSTRG.26885; |
| 4 StringTie transcript | 58868973 | 58877968 . | - . | transcript_MSTRG.26923.¿gene_id | MSTRG.26923; |
| 4 StringTie exon       | 58868973 | 58870509 . | - . | transcript_MSTRG.26923.¿gene_id | MSTRG.26923; |
| 4 StringTie exon       | 58871141 | 58871179 . | - . | transcript_MSTRG.26923.¿gene_id | MSTRG.26923; |
| 4 StringTie exon       | 58877672 | 58877968 . | - . | transcript_MSTRG.26923.¿gene_id | MSTRG.26923; |
| 4 StringTie transcript | 62182422 | 62197652 . | - . | transcript_MSTRG.26961.¿gene_id | MSTRG.26961; |
| 4 StringTie exon       | 62182422 | 62182548 . | - . | transcript_MSTRG.26961.¿gene_id | MSTRG.26961; |
| 4 StringTie exon       | 62194786 | 62197652 . | - . | transcript_MSTRG.26961.¿gene_id | MSTRG.26961; |
| 4 StringTie transcript | 64367264 | 64429208 . | - . | transcript_MSTRG.26967.¿gene_id | MSTRG.26967; |
| 4 StringTie exon       | 64367264 | 64367321 . | - . | transcript_MSTRG.26967.¿gene_id | MSTRG.26967; |
| 4 StringTie exon       | 64428963 | 64429208 . | - . | transcript_MSTRG.26967.¿gene_id | MSTRG.26967; |
| 4 StringTie transcript | 68037755 | 68058951 . | - . | transcript_MSTRG.27020.¿gene_id | MSTRG.27020; |
| 4 StringTie exon       | 68037755 | 68038053 . | - . | transcript_MSTRG.27020.¿gene_id | MSTRG.27020; |

|                       |          |          |   |   |   |                         |          |              |
|-----------------------|----------|----------|---|---|---|-------------------------|----------|--------------|
| 4 StringTie exon      | 68058338 | 68058951 | . | - | . | transcript_MSTRG.27020. | lgene_id | MSTRG.27020; |
| 4 StringTie transcrip | 71615147 | 71618461 | . | - | . | transcript_MSTRG.27088. | lgene_id | MSTRG.27088; |
| 4 StringTie exon      | 71615147 | 71615367 | . | - | . | transcript_MSTRG.27088. | lgene_id | MSTRG.27088; |
| 4 StringTie exon      | 71616573 | 71616867 | . | - | . | transcript_MSTRG.27088. | lgene_id | MSTRG.27088; |
| 4 StringTie exon      | 71618295 | 71618461 | . | - | . | transcript_MSTRG.27088. | lgene_id | MSTRG.27088; |
| 4 StringTie transcrip | 71615894 | 71618463 | . | - | . | transcript_MSTRG.27088. | lgene_id | MSTRG.27088; |
| 4 StringTie exon      | 71615894 | 71615982 | . | - | . | transcript_MSTRG.27088. | lgene_id | MSTRG.27088; |
| 4 StringTie exon      | 71616573 | 71616867 | . | - | . | transcript_MSTRG.27088. | lgene_id | MSTRG.27088; |
| 4 StringTie exon      | 71618295 | 71618463 | . | - | . | transcript_MSTRG.27088. | lgene_id | MSTRG.27088; |
| 4 StringTie transcrip | 71621455 | 71624179 | . | - | . | transcript_MSTRG.27089. | lgene_id | MSTRG.27089; |
| 4 StringTie exon      | 71621455 | 71621566 | . | - | . | transcript_MSTRG.27089. | lgene_id | MSTRG.27089; |
| 4 StringTie exon      | 71622387 | 71622443 | . | - | . | transcript_MSTRG.27089. | lgene_id | MSTRG.27089; |
| 4 StringTie exon      | 71623111 | 71624179 | . | - | . | transcript_MSTRG.27089. | lgene_id | MSTRG.27089; |
| 4 StringTie transcrip | 77592777 | 77594193 | . | - | . | transcript_MSTRG.27245. | lgene_id | MSTRG.27245; |
| 4 StringTie exon      | 77592777 | 77593290 | . | - | . | transcript_MSTRG.27245. | lgene_id | MSTRG.27245; |
| 4 StringTie exon      | 77593439 | 77593528 | . | - | . | transcript_MSTRG.27245. | lgene_id | MSTRG.27245; |
| 4 StringTie exon      | 77594100 | 77594193 | . | - | . | transcript_MSTRG.27245. | lgene_id | MSTRG.27245; |
| 4 StringTie transcrip | 77592789 | 77594193 | . | - | . | transcript_MSTRG.27245. | lgene_id | MSTRG.27245; |
| 4 StringTie exon      | 77592789 | 77593528 | . | - | . | transcript_MSTRG.27245. | lgene_id | MSTRG.27245; |
| 4 StringTie exon      | 77594100 | 77594193 | . | - | . | transcript_MSTRG.27245. | lgene_id | MSTRG.27245; |
| 4 StringTie transcrip | 79424347 | 79425055 | . | - | . | transcript_MSTRG.27248. | lgene_id | MSTRG.27248; |
| 4 StringTie exon      | 79424347 | 79424757 | . | - | . | transcript_MSTRG.27248. | lgene_id | MSTRG.27248; |
| 4 StringTie exon      | 79425011 | 79425055 | . | - | . | transcript_MSTRG.27248. | lgene_id | MSTRG.27248; |
| 4 StringTie transcrip | 82304612 | 82308891 | . | - | . | transcript_MSTRG.27311. | lgene_id | MSTRG.27311; |
| 4 StringTie exon      | 82304612 | 82304749 | . | - | . | transcript_MSTRG.27311. | lgene_id | MSTRG.27311; |
| 4 StringTie exon      | 82307671 | 82308891 | . | - | . | transcript_MSTRG.27311. | lgene_id | MSTRG.27311; |
| 4 StringTie transcrip | 82366322 | 82385965 | . | - | . | transcript_MSTRG.27311. | lgene_id | MSTRG.27311; |
| 4 StringTie exon      | 82366322 | 82366400 | . | - | . | transcript_MSTRG.27311. | lgene_id | MSTRG.27311; |
| 4 StringTie exon      | 82385836 | 82385965 | . | - | . | transcript_MSTRG.27311. | lgene_id | MSTRG.27311; |
| 4 StringTie transcrip | 93418543 | 93418829 | . | - | . | transcript_MSTRG.27608. | lgene_id | MSTRG.27608; |
| 4 StringTie exon      | 93418543 | 93418652 | . | - | . | transcript_MSTRG.27608. | lgene_id | MSTRG.27608; |
| 4 StringTie exon      | 93418719 | 93418829 | . | - | . | transcript_MSTRG.27608. | lgene_id | MSTRG.27608; |
| 4 StringTie transcrip | 94449212 | 94456637 | . | - | . | transcript_MSTRG.27649. | lgene_id | MSTRG.27649; |
| 4 StringTie exon      | 94449212 | 94449494 | . | - | . | transcript_MSTRG.27649. | lgene_id | MSTRG.27649; |
| 4 StringTie exon      | 94456589 | 94456637 | . | - | . | transcript_MSTRG.27649. | lgene_id | MSTRG.27649; |

|                        |           |           |   |   |   |                                 |              |
|------------------------|-----------|-----------|---|---|---|---------------------------------|--------------|
| 4 StringTie transcript | 97292485  | 97319210  | . | - | . | transcript_MSTRG.27732.lgene_id | MSTRG.27732; |
| 4 StringTie exon       | 97292485  | 97292608  | . | - | . | transcript_MSTRG.27732.lgene_id | MSTRG.27732; |
| 4 StringTie exon       | 97317723  | 97317863  | . | - | . | transcript_MSTRG.27732.lgene_id | MSTRG.27732; |
| 4 StringTie exon       | 97319183  | 97319210  | . | - | . | transcript_MSTRG.27732.lgene_id | MSTRG.27732; |
| 4 StringTie transcript | 99342887  | 99352327  | . | - | . | transcript_MSTRG.27852.lgene_id | MSTRG.27852; |
| 4 StringTie exon       | 99342887  | 99343074  | . | - | . | transcript_MSTRG.27852.lgene_id | MSTRG.27852; |
| 4 StringTie exon       | 99352219  | 99352327  | . | - | . | transcript_MSTRG.27852.lgene_id | MSTRG.27852; |
| 4 StringTie transcript | 99347030  | 99348303  | . | - | . | transcript_MSTRG.27854.lgene_id | MSTRG.27854; |
| 4 StringTie exon       | 99347030  | 99347378  | . | - | . | transcript_MSTRG.27854.lgene_id | MSTRG.27854; |
| 4 StringTie exon       | 99348219  | 99348303  | . | - | . | transcript_MSTRG.27854.lgene_id | MSTRG.27854; |
| 4 StringTie transcript | 105066868 | 105075423 | . | - | . | transcript_MSTRG.28017.lgene_id | MSTRG.28017; |
| 4 StringTie exon       | 105066868 | 105066956 | . | - | . | transcript_MSTRG.28017.lgene_id | MSTRG.28017; |
| 4 StringTie exon       | 105075051 | 105075423 | . | - | . | transcript_MSTRG.28017.lgene_id | MSTRG.28017; |
| 4 StringTie transcript | 105091592 | 105113363 | . | - | . | transcript_MSTRG.28020.lgene_id | MSTRG.28020; |
| 4 StringTie exon       | 105091592 | 105091677 | . | - | . | transcript_MSTRG.28020.lgene_id | MSTRG.28020; |
| 4 StringTie exon       | 105113111 | 105113363 | . | - | . | transcript_MSTRG.28020.lgene_id | MSTRG.28020; |
| 4 StringTie transcript | 105109211 | 105113296 | . | - | . | transcript_MSTRG.28020.lgene_id | MSTRG.28020; |
| 4 StringTie exon       | 105109211 | 105109342 | . | - | . | transcript_MSTRG.28020.lgene_id | MSTRG.28020; |
| 4 StringTie exon       | 105113111 | 105113296 | . | - | . | transcript_MSTRG.28020.lgene_id | MSTRG.28020; |
| 4 StringTie transcript | 108075466 | 108080305 | . | - | . | transcript_MSTRG.28095.lgene_id | MSTRG.28095; |
| 4 StringTie exon       | 108075466 | 108075702 | . | - | . | transcript_MSTRG.28095.lgene_id | MSTRG.28095; |
| 4 StringTie exon       | 108076073 | 108076318 | . | - | . | transcript_MSTRG.28095.lgene_id | MSTRG.28095; |
| 4 StringTie exon       | 108079923 | 108080305 | . | - | . | transcript_MSTRG.28095.lgene_id | MSTRG.28095; |
| 4 StringTie transcript | 108075548 | 108080147 | . | - | . | transcript_MSTRG.28095.lgene_id | MSTRG.28095; |
| 4 StringTie exon       | 108075548 | 108075702 | . | - | . | transcript_MSTRG.28095.lgene_id | MSTRG.28095; |
| 4 StringTie exon       | 108079923 | 108080147 | . | - | . | transcript_MSTRG.28095.lgene_id | MSTRG.28095; |
| 4 StringTie transcript | 110676780 | 110692890 | . | - | . | transcript_MSTRG.28202.lgene_id | MSTRG.28202; |
| 4 StringTie exon       | 110676780 | 110678632 | . | - | . | transcript_MSTRG.28202.lgene_id | MSTRG.28202; |
| 4 StringTie exon       | 110686945 | 110687128 | . | - | . | transcript_MSTRG.28202.lgene_id | MSTRG.28202; |
| 4 StringTie exon       | 110692716 | 110692890 | . | - | . | transcript_MSTRG.28202.lgene_id | MSTRG.28202; |
| 4 StringTie transcript | 123074721 | 123085676 | . | - | . | transcript_MSTRG.28363.lgene_id | MSTRG.28363; |
| 4 StringTie exon       | 123074721 | 123074903 | . | - | . | transcript_MSTRG.28363.lgene_id | MSTRG.28363; |
| 4 StringTie exon       | 123085520 | 123085676 | . | - | . | transcript_MSTRG.28363.lgene_id | MSTRG.28363; |
| 4 StringTie transcript | 127144146 | 127158094 | . | - | . | transcript_MSTRG.28469.lgene_id | MSTRG.28469; |
| 4 StringTie exon       | 127144146 | 127144867 | . | - | . | transcript_MSTRG.28469.lgene_id | MSTRG.28469; |

|                        |           |           |   |   |   |                                 |              |
|------------------------|-----------|-----------|---|---|---|---------------------------------|--------------|
| 4 StringTie exon       | 127155686 | 127155871 | . | - | . | transcript_MSTRG.28469.lgene_id | MSTRG.28469; |
| 4 StringTie exon       | 127157789 | 127158094 | . | - | . | transcript_MSTRG.28469.lgene_id | MSTRG.28469; |
| 4 StringTie transcript | 127413001 | 127451384 | . | - | . | transcript_MSTRG.28484.lgene_id | MSTRG.28484; |
| 4 StringTie exon       | 127413001 | 127414586 | . | - | . | transcript_MSTRG.28484.lgene_id | MSTRG.28484; |
| 4 StringTie exon       | 127415381 | 127415598 | . | - | . | transcript_MSTRG.28484.lgene_id | MSTRG.28484; |
| 4 StringTie exon       | 127444429 | 127444637 | . | - | . | transcript_MSTRG.28484.lgene_id | MSTRG.28484; |
| 4 StringTie exon       | 127450284 | 127450344 | . | - | . | transcript_MSTRG.28484.lgene_id | MSTRG.28484; |
| 4 StringTie exon       | 127451258 | 127451384 | . | - | . | transcript_MSTRG.28484.lgene_id | MSTRG.28484; |
| 4 StringTie transcript | 130227319 | 130228836 | . | - | . | transcript_MSTRG.28505.lgene_id | MSTRG.28505; |
| 4 StringTie exon       | 130227319 | 130228836 | . | - | . | transcript_MSTRG.28505.lgene_id | MSTRG.28505; |
| 4 StringTie transcript | 130227343 | 130230291 | . | - | . | transcript_MSTRG.28505.lgene_id | MSTRG.28505; |
| 4 StringTie exon       | 130227343 | 130227560 | . | - | . | transcript_MSTRG.28505.lgene_id | MSTRG.28505; |
| 4 StringTie exon       | 130228781 | 130228833 | . | - | . | transcript_MSTRG.28505.lgene_id | MSTRG.28505; |
| 4 StringTie exon       | 130230211 | 130230291 | . | - | . | transcript_MSTRG.28505.lgene_id | MSTRG.28505; |
| 4 StringTie transcript | 130663283 | 130665611 | . | - | . | transcript_MSTRG.28524.lgene_id | MSTRG.28524; |
| 4 StringTie exon       | 130663283 | 130663330 | . | - | . | transcript_MSTRG.28524.lgene_id | MSTRG.28524; |
| 4 StringTie exon       | 130665247 | 130665611 | . | - | . | transcript_MSTRG.28524.lgene_id | MSTRG.28524; |
| 4 StringTie transcript | 130689981 | 130700693 | . | - | . | transcript_MSTRG.28526.lgene_id | MSTRG.28526; |
| 4 StringTie exon       | 130689981 | 130690068 | . | - | . | transcript_MSTRG.28526.lgene_id | MSTRG.28526; |
| 4 StringTie exon       | 130700508 | 130700693 | . | - | . | transcript_MSTRG.28526.lgene_id | MSTRG.28526; |
| 4 StringTie transcript | 130695135 | 130703041 | . | - | . | transcript_MSTRG.28527.lgene_id | MSTRG.28527; |
| 4 StringTie exon       | 130695135 | 130697911 | . | - | . | transcript_MSTRG.28527.lgene_id | MSTRG.28527; |
| 4 StringTie exon       | 130702966 | 130703041 | . | - | . | transcript_MSTRG.28527.lgene_id | MSTRG.28527; |
| 5 StringTie transcript | 689159    | 694405    | . | + | . | transcript_MSTRG.28551.lgene_id | MSTRG.28551; |
| 5 StringTie exon       | 689159    | 689389    | . | + | . | transcript_MSTRG.28551.lgene_id | MSTRG.28551; |
| 5 StringTie exon       | 693140    | 693236    | . | + | . | transcript_MSTRG.28551.lgene_id | MSTRG.28551; |
| 5 StringTie exon       | 694325    | 694405    | . | + | . | transcript_MSTRG.28551.lgene_id | MSTRG.28551; |
| 5 StringTie transcript | 3294852   | 3301663   | . | + | . | transcript_MSTRG.28602.lgene_id | MSTRG.28602; |
| 5 StringTie exon       | 3294852   | 3296098   | . | + | . | transcript_MSTRG.28602.lgene_id | MSTRG.28602; |
| 5 StringTie exon       | 3296120   | 3301663   | . | + | . | transcript_MSTRG.28602.lgene_id | MSTRG.28602; |
| 5 StringTie transcript | 3460380   | 3462280   | . | + | . | transcript_MSTRG.28594.lgene_id | MSTRG.28594; |
| 5 StringTie exon       | 3460380   | 3461768   | . | + | . | transcript_MSTRG.28594.lgene_id | MSTRG.28594; |
| 5 StringTie exon       | 3461979   | 3462280   | . | + | . | transcript_MSTRG.28594.lgene_id | MSTRG.28594; |
| 5 StringTie transcript | 3460457   | 3462284   | . | + | . | transcript_MSTRG.28594.lgene_id | MSTRG.28594; |
| 5 StringTie exon       | 3460457   | 3462284   | . | + | . | transcript_MSTRG.28594.lgene_id | MSTRG.28594; |

|                       |          |            |   |   |                                 |              |
|-----------------------|----------|------------|---|---|---------------------------------|--------------|
| 5 StringTie transcrip | 5074101  | 5077189 .  | + | . | transcript_MSTRG.28630.lgene_id | MSTRG.28630; |
| 5 StringTie exon      | 5074101  | 5074203 .  | + | . | transcript_MSTRG.28630.lgene_id | MSTRG.28630; |
| 5 StringTie exon      | 5076957  | 5077189 .  | + | . | transcript_MSTRG.28630.lgene_id | MSTRG.28630; |
| 5 StringTie transcrip | 6346531  | 6351275 .  | + | . | transcript_MSTRG.28659.lgene_id | MSTRG.28659; |
| 5 StringTie exon      | 6346531  | 6346670 .  | + | . | transcript_MSTRG.28659.lgene_id | MSTRG.28659; |
| 5 StringTie exon      | 6350913  | 6351275 .  | + | . | transcript_MSTRG.28659.lgene_id | MSTRG.28659; |
| 5 StringTie transcrip | 7110601  | 7117267 .  | + | . | transcript_MSTRG.28680.lgene_id | MSTRG.28680; |
| 5 StringTie exon      | 7110601  | 7110644 .  | + | . | transcript_MSTRG.28680.lgene_id | MSTRG.28680; |
| 5 StringTie exon      | 7111768  | 7111841 .  | + | . | transcript_MSTRG.28680.lgene_id | MSTRG.28680; |
| 5 StringTie exon      | 7117058  | 7117267 .  | + | . | transcript_MSTRG.28680.lgene_id | MSTRG.28680; |
| 5 StringTie transcrip | 8046031  | 8049870 .  | + | . | transcript_MSTRG.28703.lgene_id | MSTRG.28703; |
| 5 StringTie exon      | 8046031  | 8046380 .  | + | . | transcript_MSTRG.28703.lgene_id | MSTRG.28703; |
| 5 StringTie exon      | 8049144  | 8049870 .  | + | . | transcript_MSTRG.28703.lgene_id | MSTRG.28703; |
| 5 StringTie transcrip | 9141884  | 9169820 .  | + | . | transcript_MSTRG.28734.lgene_id | MSTRG.28734; |
| 5 StringTie exon      | 9141884  | 9142115 .  | + | . | transcript_MSTRG.28734.lgene_id | MSTRG.28734; |
| 5 StringTie exon      | 9148431  | 9148512 .  | + | . | transcript_MSTRG.28734.lgene_id | MSTRG.28734; |
| 5 StringTie exon      | 9169498  | 9169820 .  | + | . | transcript_MSTRG.28734.lgene_id | MSTRG.28734; |
| 5 StringTie transcrip | 9815734  | 9823341 .  | + | . | transcript_MSTRG.28772.lgene_id | MSTRG.28772; |
| 5 StringTie exon      | 9815734  | 9816100 .  | + | . | transcript_MSTRG.28772.lgene_id | MSTRG.28772; |
| 5 StringTie exon      | 9818659  | 9818746 .  | + | . | transcript_MSTRG.28772.lgene_id | MSTRG.28772; |
| 5 StringTie exon      | 9820254  | 9823341 .  | + | . | transcript_MSTRG.28772.lgene_id | MSTRG.28772; |
| 5 StringTie transcrip | 9815768  | 9822149 .  | + | . | transcript_MSTRG.28772.lgene_id | MSTRG.28772; |
| 5 StringTie exon      | 9815768  | 9815962 .  | + | . | transcript_MSTRG.28772.lgene_id | MSTRG.28772; |
| 5 StringTie exon      | 9820254  | 9822149 .  | + | . | transcript_MSTRG.28772.lgene_id | MSTRG.28772; |
| 5 StringTie transcrip | 18397815 | 18403548 . | + | . | transcript_MSTRG.29006.lgene_id | MSTRG.29006; |
| 5 StringTie exon      | 18397815 | 18398644 . | + | . | transcript_MSTRG.29006.lgene_id | MSTRG.29006; |
| 5 StringTie exon      | 18400286 | 18403548 . | + | . | transcript_MSTRG.29006.lgene_id | MSTRG.29006; |
| 5 StringTie transcrip | 19104831 | 19111847 . | + | . | transcript_MSTRG.29036.lgene_id | MSTRG.29036; |
| 5 StringTie exon      | 19104831 | 19104903 . | + | . | transcript_MSTRG.29036.lgene_id | MSTRG.29036; |
| 5 StringTie exon      | 19111678 | 19111847 . | + | . | transcript_MSTRG.29036.lgene_id | MSTRG.29036; |
| 5 StringTie transcrip | 19344837 | 19350116 . | + | . | transcript_MSTRG.29049.lgene_id | MSTRG.29049; |
| 5 StringTie exon      | 19344837 | 19344975 . | + | . | transcript_MSTRG.29049.lgene_id | MSTRG.29049; |
| 5 StringTie exon      | 19350038 | 19350116 . | + | . | transcript_MSTRG.29049.lgene_id | MSTRG.29049; |
| 5 StringTie transcrip | 20208617 | 20213203 . | + | . | transcript_MSTRG.29066.lgene_id | MSTRG.29066; |
| 5 StringTie exon      | 20208617 | 20208734 . | + | . | transcript_MSTRG.29066.lgene_id | MSTRG.29066; |

|                       |          |            |   |   |                                 |              |
|-----------------------|----------|------------|---|---|---------------------------------|--------------|
| 5 StringTie exon      | 20212826 | 20213203 . | + | . | transcript_MSTRG.29066.lgene_id | MSTRG.29066; |
| 5 StringTie transcrip | 21180809 | 21186161 . | + | . | transcript_MSTRG.29074.lgene_id | MSTRG.29074; |
| 5 StringTie exon      | 21180809 | 21181160 . | + | . | transcript_MSTRG.29074.lgene_id | MSTRG.29074; |
| 5 StringTie exon      | 21186091 | 21186161 . | + | . | transcript_MSTRG.29074.lgene_id | MSTRG.29074; |
| 5 StringTie transcrip | 21987244 | 21989244 . | + | . | transcript_MSTRG.29150.lgene_id | MSTRG.29150; |
| 5 StringTie exon      | 21987244 | 21987353 . | + | . | transcript_MSTRG.29150.lgene_id | MSTRG.29150; |
| 5 StringTie exon      | 21989134 | 21989244 . | + | . | transcript_MSTRG.29150.lgene_id | MSTRG.29150; |
| 5 StringTie transcrip | 22252178 | 22272031 . | + | . | transcript_MSTRG.29167.lgene_id | MSTRG.29167; |
| 5 StringTie exon      | 22252178 | 22252286 . | + | . | transcript_MSTRG.29167.lgene_id | MSTRG.29167; |
| 5 StringTie exon      | 22271848 | 22272031 . | + | . | transcript_MSTRG.29167.lgene_id | MSTRG.29167; |
| 5 StringTie transcrip | 22257623 | 22266951 . | + | . | transcript_MSTRG.29168.lgene_id | MSTRG.29168; |
| 5 StringTie exon      | 22257623 | 22257733 . | + | . | transcript_MSTRG.29168.lgene_id | MSTRG.29168; |
| 5 StringTie exon      | 22266787 | 22266951 . | + | . | transcript_MSTRG.29168.lgene_id | MSTRG.29168; |
| 5 StringTie transcrip | 22262184 | 22278560 . | + | . | transcript_MSTRG.29169.lgene_id | MSTRG.29169; |
| 5 StringTie exon      | 22262184 | 22262288 . | + | . | transcript_MSTRG.29169.lgene_id | MSTRG.29169; |
| 5 StringTie exon      | 22278450 | 22278560 . | + | . | transcript_MSTRG.29169.lgene_id | MSTRG.29169; |
| 5 StringTie transcrip | 39309451 | 39331254 . | + | . | transcript_MSTRG.29500.lgene_id | MSTRG.29500; |
| 5 StringTie exon      | 39309451 | 39312037 . | + | . | transcript_MSTRG.29500.lgene_id | MSTRG.29500; |
| 5 StringTie exon      | 39331160 | 39331254 . | + | . | transcript_MSTRG.29500.lgene_id | MSTRG.29500; |
| 5 StringTie transcrip | 40424454 | 40426524 . | + | . | transcript_MSTRG.29504.lgene_id | MSTRG.29504; |
| 5 StringTie exon      | 40424454 | 40424680 . | + | . | transcript_MSTRG.29504.lgene_id | MSTRG.29504; |
| 5 StringTie exon      | 40426488 | 40426524 . | + | . | transcript_MSTRG.29504.lgene_id | MSTRG.29504; |
| 5 StringTie transcrip | 42299877 | 42313915 . | + | . | transcript_MSTRG.29540.lgene_id | MSTRG.29540; |
| 5 StringTie exon      | 42299877 | 42299923 . | + | . | transcript_MSTRG.29540.lgene_id | MSTRG.29540; |
| 5 StringTie exon      | 42313674 | 42313915 . | + | . | transcript_MSTRG.29540.lgene_id | MSTRG.29540; |
| 5 StringTie transcrip | 42308971 | 42313997 . | + | . | transcript_MSTRG.29540.lgene_id | MSTRG.29540; |
| 5 StringTie exon      | 42308971 | 42309037 . | + | . | transcript_MSTRG.29540.lgene_id | MSTRG.29540; |
| 5 StringTie exon      | 42313674 | 42313997 . | + | . | transcript_MSTRG.29540.lgene_id | MSTRG.29540; |
| 5 StringTie transcrip | 42485479 | 42488828 . | + | . | transcript_MSTRG.29535.lgene_id | MSTRG.29535; |
| 5 StringTie exon      | 42485479 | 42485499 . | + | . | transcript_MSTRG.29535.lgene_id | MSTRG.29535; |
| 5 StringTie exon      | 42488534 | 42488828 . | + | . | transcript_MSTRG.29535.lgene_id | MSTRG.29535; |
| 5 StringTie transcrip | 46023152 | 46024840 . | + | . | transcript_MSTRG.29574.lgene_id | MSTRG.29574; |
| 5 StringTie exon      | 46023152 | 46023281 . | + | . | transcript_MSTRG.29574.lgene_id | MSTRG.29574; |
| 5 StringTie exon      | 46024273 | 46024840 . | + | . | transcript_MSTRG.29574.lgene_id | MSTRG.29574; |
| 5 StringTie transcrip | 46323950 | 46326714 . | + | . | transcript_MSTRG.29585.lgene_id | MSTRG.29585; |



|                        |          |          |   |   |   |                                 |              |
|------------------------|----------|----------|---|---|---|---------------------------------|--------------|
| 5 StringTie exon       | 46323950 | 46325406 | . | + | . | transcript_MSTRG.29585.lgene_id | MSTRG.29585; |
| 5 StringTie exon       | 46326278 | 46326714 | . | + | . | transcript_MSTRG.29585.lgene_id | MSTRG.29585; |
| 5 StringTie transcript | 46362446 | 46401065 | . | + | . | transcript_MSTRG.29591.lgene_id | MSTRG.29591; |
| 5 StringTie exon       | 46362446 | 46362762 | . | + | . | transcript_MSTRG.29591.lgene_id | MSTRG.29591; |
| 5 StringTie exon       | 46398252 | 46401065 | . | + | . | transcript_MSTRG.29591.lgene_id | MSTRG.29591; |
| 5 StringTie transcript | 49482544 | 49531726 | . | + | . | transcript_MSTRG.29702.lgene_id | MSTRG.29702; |
| 5 StringTie exon       | 49482544 | 49482626 | . | + | . | transcript_MSTRG.29702.lgene_id | MSTRG.29702; |
| 5 StringTie exon       | 49504551 | 49504611 | . | + | . | transcript_MSTRG.29702.lgene_id | MSTRG.29702; |
| 5 StringTie exon       | 49531506 | 49531726 | . | + | . | transcript_MSTRG.29702.lgene_id | MSTRG.29702; |
| 5 StringTie transcript | 49969118 | 50005799 | . | + | . | transcript_MSTRG.29711.lgene_id | MSTRG.29711; |
| 5 StringTie exon       | 49969118 | 49969142 | . | + | . | transcript_MSTRG.29711.lgene_id | MSTRG.29711; |
| 5 StringTie exon       | 50001004 | 50005799 | . | + | . | transcript_MSTRG.29711.lgene_id | MSTRG.29711; |
| 5 StringTie transcript | 54758768 | 54763183 | . | + | . | transcript_MSTRG.29811.lgene_id | MSTRG.29811; |
| 5 StringTie exon       | 54758768 | 54760303 | . | + | . | transcript_MSTRG.29811.lgene_id | MSTRG.29811; |
| 5 StringTie exon       | 54762885 | 54763183 | . | + | . | transcript_MSTRG.29811.lgene_id | MSTRG.29811; |
| 5 StringTie transcript | 57390395 | 57393014 | . | + | . | transcript_MSTRG.29833.lgene_id | MSTRG.29833; |
| 5 StringTie exon       | 57390395 | 57390433 | . | + | . | transcript_MSTRG.29833.lgene_id | MSTRG.29833; |
| 5 StringTie exon       | 57392852 | 57393014 | . | + | . | transcript_MSTRG.29833.lgene_id | MSTRG.29833; |
| 5 StringTie transcript | 62023548 | 62025200 | . | + | . | transcript_MSTRG.29924.lgene_id | MSTRG.29924; |
| 5 StringTie exon       | 62023548 | 62023981 | . | + | . | transcript_MSTRG.29924.lgene_id | MSTRG.29924; |
| 5 StringTie exon       | 62024548 | 62025200 | . | + | . | transcript_MSTRG.29924.lgene_id | MSTRG.29924; |
| 5 StringTie transcript | 64135109 | 64141527 | . | + | . | transcript_MSTRG.30008.lgene_id | MSTRG.30008; |
| 5 StringTie exon       | 64135109 | 64135207 | . | + | . | transcript_MSTRG.30008.lgene_id | MSTRG.30008; |
| 5 StringTie exon       | 64140729 | 64140861 | . | + | . | transcript_MSTRG.30008.lgene_id | MSTRG.30008; |
| 5 StringTie exon       | 64141406 | 64141527 | . | + | . | transcript_MSTRG.30008.lgene_id | MSTRG.30008; |
| 5 StringTie transcript | 64378769 | 64420505 | . | + | . | transcript_MSTRG.30025.lgene_id | MSTRG.30025; |
| 5 StringTie exon       | 64378769 | 64378925 | . | + | . | transcript_MSTRG.30025.lgene_id | MSTRG.30025; |
| 5 StringTie exon       | 64394687 | 64394861 | . | + | . | transcript_MSTRG.30025.lgene_id | MSTRG.30025; |
| 5 StringTie exon       | 64400043 | 64400124 | . | + | . | transcript_MSTRG.30025.lgene_id | MSTRG.30025; |
| 5 StringTie exon       | 64420488 | 64420505 | . | + | . | transcript_MSTRG.30025.lgene_id | MSTRG.30025; |
| 5 StringTie transcript | 65160914 | 65171891 | . | + | . | transcript_MSTRG.30031.lgene_id | MSTRG.30031; |
| 5 StringTie exon       | 65160914 | 65161053 | . | + | . | transcript_MSTRG.30031.lgene_id | MSTRG.30031; |
| 5 StringTie exon       | 65171419 | 65171891 | . | + | . | transcript_MSTRG.30031.lgene_id | MSTRG.30031; |
| 5 StringTie transcript | 69554496 | 69555451 | . | + | . | transcript_MSTRG.30128.lgene_id | MSTRG.30128; |
| 5 StringTie exon       | 69554496 | 69554567 | . | + | . | transcript_MSTRG.30128.lgene_id | MSTRG.30128; |

|                       |          |            |   |   |                                 |              |
|-----------------------|----------|------------|---|---|---------------------------------|--------------|
| 5 StringTie exon      | 69554903 | 69555451 . | + | . | transcript_MSTRG.30128.¿gene_id | MSTRG.30128; |
| 5 StringTie transcrip | 74881408 | 74884901 . | + | . | transcript_MSTRG.30200.¿gene_id | MSTRG.30200; |
| 5 StringTie exon      | 74881408 | 74881907 . | + | . | transcript_MSTRG.30200.¿gene_id | MSTRG.30200; |
| 5 StringTie exon      | 74882102 | 74882226 . | + | . | transcript_MSTRG.30200.¿gene_id | MSTRG.30200; |
| 5 StringTie exon      | 74884510 | 74884901 . | + | . | transcript_MSTRG.30200.¿gene_id | MSTRG.30200; |
| 5 StringTie transcrip | 77005418 | 77013089 . | + | . | transcript_MSTRG.30226.¿gene_id | MSTRG.30226; |
| 5 StringTie exon      | 77005418 | 77011264 . | + | . | transcript_MSTRG.30226.¿gene_id | MSTRG.30226; |
| 5 StringTie exon      | 77011944 | 77012067 . | + | . | transcript_MSTRG.30226.¿gene_id | MSTRG.30226; |
| 5 StringTie exon      | 77013018 | 77013089 . | + | . | transcript_MSTRG.30226.¿gene_id | MSTRG.30226; |
| 5 StringTie transcrip | 77009888 | 77012015 . | + | . | transcript_MSTRG.30226.¿gene_id | MSTRG.30226; |
| 5 StringTie exon      | 77009888 | 77010031 . | + | . | transcript_MSTRG.30226.¿gene_id | MSTRG.30226; |
| 5 StringTie exon      | 77011113 | 77011264 . | + | . | transcript_MSTRG.30226.¿gene_id | MSTRG.30226; |
| 5 StringTie exon      | 77011944 | 77012015 . | + | . | transcript_MSTRG.30226.¿gene_id | MSTRG.30226; |
| 5 StringTie transcrip | 78267150 | 78288428 . | + | . | transcript_MSTRG.30265.¿gene_id | MSTRG.30265; |
| 5 StringTie exon      | 78267150 | 78267254 . | + | . | transcript_MSTRG.30265.¿gene_id | MSTRG.30265; |
| 5 StringTie exon      | 78268953 | 78269061 . | + | . | transcript_MSTRG.30265.¿gene_id | MSTRG.30265; |
| 5 StringTie exon      | 78288166 | 78288428 . | + | . | transcript_MSTRG.30265.¿gene_id | MSTRG.30265; |
| 5 StringTie transcrip | 82554075 | 82555514 . | + | . | transcript_MSTRG.30373.¿gene_id | MSTRG.30373; |
| 5 StringTie exon      | 82554075 | 82554151 . | + | . | transcript_MSTRG.30373.¿gene_id | MSTRG.30373; |
| 5 StringTie exon      | 82555052 | 82555514 . | + | . | transcript_MSTRG.30373.¿gene_id | MSTRG.30373; |
| 5 StringTie transcrip | 85272530 | 85273301 . | + | . | transcript_MSTRG.30407.¿gene_id | MSTRG.30407; |
| 5 StringTie exon      | 85272530 | 85273114 . | + | . | transcript_MSTRG.30407.¿gene_id | MSTRG.30407; |
| 5 StringTie exon      | 85273136 | 85273301 . | + | . | transcript_MSTRG.30407.¿gene_id | MSTRG.30407; |
| 5 StringTie transcrip | 89479500 | 89490328 . | + | . | transcript_MSTRG.30522.¿gene_id | MSTRG.30522; |
| 5 StringTie exon      | 89479500 | 89479672 . | + | . | transcript_MSTRG.30522.¿gene_id | MSTRG.30522; |
| 5 StringTie exon      | 89489649 | 89490328 . | + | . | transcript_MSTRG.30522.¿gene_id | MSTRG.30522; |
| 5 StringTie transcrip | 89728488 | 89954515 . | + | . | transcript_MSTRG.30536.¿gene_id | MSTRG.30536; |
| 5 StringTie exon      | 89728488 | 89728697 . | + | . | transcript_MSTRG.30536.¿gene_id | MSTRG.30536; |
| 5 StringTie exon      | 89746204 | 89746331 . | + | . | transcript_MSTRG.30536.¿gene_id | MSTRG.30536; |
| 5 StringTie exon      | 89884161 | 89884309 . | + | . | transcript_MSTRG.30536.¿gene_id | MSTRG.30536; |
| 5 StringTie exon      | 89954285 | 89954515 . | + | . | transcript_MSTRG.30536.¿gene_id | MSTRG.30536; |
| 5 StringTie transcrip | 89728567 | 90053329 . | + | . | transcript_MSTRG.30536.¿gene_id | MSTRG.30536; |
| 5 StringTie exon      | 89728567 | 89728697 . | + | . | transcript_MSTRG.30536.¿gene_id | MSTRG.30536; |
| 5 StringTie exon      | 89746204 | 89746331 . | + | . | transcript_MSTRG.30536.¿gene_id | MSTRG.30536; |
| 5 StringTie exon      | 89884161 | 89884309 . | + | . | transcript_MSTRG.30536.¿gene_id | MSTRG.30536; |

|                       |           |           |   |   |   |                                 |              |
|-----------------------|-----------|-----------|---|---|---|---------------------------------|--------------|
| 5 StringTie exon      | 90053224  | 90053329  | . | + | . | transcript_MSTRG.30536.¿gene_id | MSTRG.30536; |
| 5 StringTie transcrip | 91038633  | 91116091  | . | + | . | transcript_MSTRG.30571.¿gene_id | MSTRG.30571; |
| 5 StringTie exon      | 91038633  | 91038693  | . | + | . | transcript_MSTRG.30571.¿gene_id | MSTRG.30571; |
| 5 StringTie exon      | 91068924  | 91069059  | . | + | . | transcript_MSTRG.30571.¿gene_id | MSTRG.30571; |
| 5 StringTie exon      | 91094027  | 91094086  | . | + | . | transcript_MSTRG.30571.¿gene_id | MSTRG.30571; |
| 5 StringTie exon      | 91094706  | 91094886  | . | + | . | transcript_MSTRG.30571.¿gene_id | MSTRG.30571; |
| 5 StringTie exon      | 91113511  | 91116091  | . | + | . | transcript_MSTRG.30571.¿gene_id | MSTRG.30571; |
| 5 StringTie transcrip | 91081632  | 91114796  | . | + | . | transcript_MSTRG.30571.¿gene_id | MSTRG.30571; |
| 5 StringTie exon      | 91081632  | 91081722  | . | + | . | transcript_MSTRG.30571.¿gene_id | MSTRG.30571; |
| 5 StringTie exon      | 91083146  | 91083284  | . | + | . | transcript_MSTRG.30571.¿gene_id | MSTRG.30571; |
| 5 StringTie exon      | 91094027  | 91094086  | . | + | . | transcript_MSTRG.30571.¿gene_id | MSTRG.30571; |
| 5 StringTie exon      | 91094706  | 91094886  | . | + | . | transcript_MSTRG.30571.¿gene_id | MSTRG.30571; |
| 5 StringTie exon      | 91113511  | 91114796  | . | + | . | transcript_MSTRG.30571.¿gene_id | MSTRG.30571; |
| 5 StringTie transcrip | 91094019  | 91115078  | . | + | . | transcript_MSTRG.30571.¿gene_id | MSTRG.30571; |
| 5 StringTie exon      | 91094019  | 91094086  | . | + | . | transcript_MSTRG.30571.¿gene_id | MSTRG.30571; |
| 5 StringTie exon      | 91094706  | 91094886  | . | + | . | transcript_MSTRG.30571.¿gene_id | MSTRG.30571; |
| 5 StringTie exon      | 91113511  | 91113691  | . | + | . | transcript_MSTRG.30571.¿gene_id | MSTRG.30571; |
| 5 StringTie exon      | 91113783  | 91115078  | . | + | . | transcript_MSTRG.30571.¿gene_id | MSTRG.30571; |
| 5 StringTie transcrip | 92812567  | 92900121  | . | + | . | transcript_MSTRG.30589.¿gene_id | MSTRG.30589; |
| 5 StringTie exon      | 92812567  | 92812761  | . | + | . | transcript_MSTRG.30589.¿gene_id | MSTRG.30589; |
| 5 StringTie exon      | 92838094  | 92838177  | . | + | . | transcript_MSTRG.30589.¿gene_id | MSTRG.30589; |
| 5 StringTie exon      | 92892698  | 92892775  | . | + | . | transcript_MSTRG.30589.¿gene_id | MSTRG.30589; |
| 5 StringTie exon      | 92900074  | 92900121  | . | + | . | transcript_MSTRG.30589.¿gene_id | MSTRG.30589; |
| 5 StringTie transcrip | 94297605  | 94328234  | . | + | . | transcript_MSTRG.30640.¿gene_id | MSTRG.30640; |
| 5 StringTie exon      | 94297605  | 94297636  | . | + | . | transcript_MSTRG.30640.¿gene_id | MSTRG.30640; |
| 5 StringTie exon      | 94327314  | 94328234  | . | + | . | transcript_MSTRG.30640.¿gene_id | MSTRG.30640; |
| 5 StringTie transcrip | 103351195 | 103358162 | . | + | . | transcript_MSTRG.30688.¿gene_id | MSTRG.30688; |
| 5 StringTie exon      | 103351195 | 103351249 | . | + | . | transcript_MSTRG.30688.¿gene_id | MSTRG.30688; |
| 5 StringTie exon      | 103355341 | 103355485 | . | + | . | transcript_MSTRG.30688.¿gene_id | MSTRG.30688; |
| 5 StringTie exon      | 103356449 | 103356880 | . | + | . | transcript_MSTRG.30688.¿gene_id | MSTRG.30688; |
| 5 StringTie exon      | 103358074 | 103358162 | . | + | . | transcript_MSTRG.30688.¿gene_id | MSTRG.30688; |
| 5 StringTie transcrip | 104379202 | 104404036 | . | + | . | transcript_MSTRG.30695.¿gene_id | MSTRG.30695; |
| 5 StringTie exon      | 104379202 | 104379402 | . | + | . | transcript_MSTRG.30695.¿gene_id | MSTRG.30695; |
| 5 StringTie exon      | 104403982 | 104404036 | . | + | . | transcript_MSTRG.30695.¿gene_id | MSTRG.30695; |
| 5 StringTie transcrip | 91248     | 92654     | . | - | . | transcript_MSTRG.28536.¿gene_id | MSTRG.28536; |

|                        |          |          |   |   |   |                                 |              |
|------------------------|----------|----------|---|---|---|---------------------------------|--------------|
| 5 StringTie exon       | 91248    | 91582    | . | - | . | transcript_MSTRG.28536.¿gene_id | MSTRG.28536; |
| 5 StringTie exon       | 92520    | 92654    | . | - | . | transcript_MSTRG.28536.¿gene_id | MSTRG.28536; |
| 5 StringTie transcript | 4906700  | 4907825  | . | - | . | transcript_MSTRG.28622.lgene_id | MSTRG.28622; |
| 5 StringTie exon       | 4906700  | 4907034  | . | - | . | transcript_MSTRG.28622.lgene_id | MSTRG.28622; |
| 5 StringTie exon       | 4907625  | 4907825  | . | - | . | transcript_MSTRG.28622.lgene_id | MSTRG.28622; |
| 5 StringTie transcript | 6283479  | 6290544  | . | - | . | transcript_MSTRG.28656.lgene_id | MSTRG.28656; |
| 5 StringTie exon       | 6283479  | 6284154  | . | - | . | transcript_MSTRG.28656.lgene_id | MSTRG.28656; |
| 5 StringTie exon       | 6286488  | 6286634  | . | - | . | transcript_MSTRG.28656.lgene_id | MSTRG.28656; |
| 5 StringTie exon       | 6290101  | 6290544  | . | - | . | transcript_MSTRG.28656.lgene_id | MSTRG.28656; |
| 5 StringTie transcript | 8971953  | 8976026  | . | - | . | transcript_MSTRG.28724.lgene_id | MSTRG.28724; |
| 5 StringTie exon       | 8971953  | 8972147  | . | - | . | transcript_MSTRG.28724.lgene_id | MSTRG.28724; |
| 5 StringTie exon       | 8975770  | 8976026  | . | - | . | transcript_MSTRG.28724.lgene_id | MSTRG.28724; |
| 5 StringTie transcript | 9419336  | 9485571  | . | - | . | transcript_MSTRG.28762.lgene_id | MSTRG.28762; |
| 5 StringTie exon       | 9419336  | 9419517  | . | - | . | transcript_MSTRG.28762.lgene_id | MSTRG.28762; |
| 5 StringTie exon       | 9485502  | 9485571  | . | - | . | transcript_MSTRG.28762.lgene_id | MSTRG.28762; |
| 5 StringTie transcript | 11908534 | 11913292 | . | - | . | transcript_MSTRG.28837.lgene_id | MSTRG.28837; |
| 5 StringTie exon       | 11908534 | 11911565 | . | - | . | transcript_MSTRG.28837.lgene_id | MSTRG.28837; |
| 5 StringTie exon       | 11912672 | 11913292 | . | - | . | transcript_MSTRG.28837.lgene_id | MSTRG.28837; |
| 5 StringTie transcript | 14030040 | 14068160 | . | - | . | transcript_MSTRG.28874.lgene_id | MSTRG.28874; |
| 5 StringTie exon       | 14030040 | 14031067 | . | - | . | transcript_MSTRG.28874.lgene_id | MSTRG.28874; |
| 5 StringTie exon       | 14056824 | 14057044 | . | - | . | transcript_MSTRG.28874.lgene_id | MSTRG.28874; |
| 5 StringTie exon       | 14059391 | 14059530 | . | - | . | transcript_MSTRG.28874.lgene_id | MSTRG.28874; |
| 5 StringTie exon       | 14061205 | 14062357 | . | - | . | transcript_MSTRG.28874.lgene_id | MSTRG.28874; |
| 5 StringTie exon       | 14067842 | 14068160 | . | - | . | transcript_MSTRG.28874.lgene_id | MSTRG.28874; |
| 5 StringTie transcript | 14030047 | 14067882 | . | - | . | transcript_MSTRG.28874.¿gene_id | MSTRG.28874; |
| 5 StringTie exon       | 14030047 | 14031067 | . | - | . | transcript_MSTRG.28874.¿gene_id | MSTRG.28874; |
| 5 StringTie exon       | 14056824 | 14057044 | . | - | . | transcript_MSTRG.28874.¿gene_id | MSTRG.28874; |
| 5 StringTie exon       | 14059391 | 14059530 | . | - | . | transcript_MSTRG.28874.¿gene_id | MSTRG.28874; |
| 5 StringTie exon       | 14061205 | 14062357 | . | - | . | transcript_MSTRG.28874.¿gene_id | MSTRG.28874; |
| 5 StringTie exon       | 14062851 | 14062925 | . | - | . | transcript_MSTRG.28874.¿gene_id | MSTRG.28874; |
| 5 StringTie exon       | 14067842 | 14067882 | . | - | . | transcript_MSTRG.28874.¿gene_id | MSTRG.28874; |
| 5 StringTie transcript | 14030484 | 14068010 | . | - | . | transcript_MSTRG.28874.¿gene_id | MSTRG.28874; |
| 5 StringTie exon       | 14030484 | 14031067 | . | - | . | transcript_MSTRG.28874.¿gene_id | MSTRG.28874; |
| 5 StringTie exon       | 14067842 | 14068010 | . | - | . | transcript_MSTRG.28874.¿gene_id | MSTRG.28874; |
| 5 StringTie transcript | 14030484 | 14068160 | . | - | . | transcript_MSTRG.28874.¿gene_id | MSTRG.28874; |

|                       |          |            |     |                                 |              |
|-----------------------|----------|------------|-----|---------------------------------|--------------|
| 5 StringTie exon      | 14030484 | 14031067 . | - . | transcript_MSTRG.28874.¿gene_id | MSTRG.28874; |
| 5 StringTie exon      | 14056824 | 14057321 . | - . | transcript_MSTRG.28874.¿gene_id | MSTRG.28874; |
| 5 StringTie exon      | 14059391 | 14059530 . | - . | transcript_MSTRG.28874.¿gene_id | MSTRG.28874; |
| 5 StringTie exon      | 14061205 | 14062357 . | - . | transcript_MSTRG.28874.¿gene_id | MSTRG.28874; |
| 5 StringTie exon      | 14067842 | 14068160 . | - . | transcript_MSTRG.28874.¿gene_id | MSTRG.28874; |
| 5 StringTie transcrip | 14032397 | 14061304 . | - . | transcript_MSTRG.28874.¿gene_id | MSTRG.28874; |
| 5 StringTie exon      | 14032397 | 14032627 . | - . | transcript_MSTRG.28874.¿gene_id | MSTRG.28874; |
| 5 StringTie exon      | 14056824 | 14057044 . | - . | transcript_MSTRG.28874.¿gene_id | MSTRG.28874; |
| 5 StringTie exon      | 14059391 | 14059530 . | - . | transcript_MSTRG.28874.¿gene_id | MSTRG.28874; |
| 5 StringTie exon      | 14061205 | 14061304 . | - . | transcript_MSTRG.28874.¿gene_id | MSTRG.28874; |
| 5 StringTie transcrip | 16006972 | 16008494 . | - . | transcript_MSTRG.28946.¿gene_id | MSTRG.28946; |
| 5 StringTie exon      | 16006972 | 16007081 . | - . | transcript_MSTRG.28946.¿gene_id | MSTRG.28946; |
| 5 StringTie exon      | 16008040 | 16008253 . | - . | transcript_MSTRG.28946.¿gene_id | MSTRG.28946; |
| 5 StringTie exon      | 16008406 | 16008494 . | - . | transcript_MSTRG.28946.¿gene_id | MSTRG.28946; |
| 5 StringTie transcrip | 16006972 | 16016114 . | - . | transcript_MSTRG.28946.¿gene_id | MSTRG.28946; |
| 5 StringTie exon      | 16006972 | 16007081 . | - . | transcript_MSTRG.28946.¿gene_id | MSTRG.28946; |
| 5 StringTie exon      | 16008040 | 16008253 . | - . | transcript_MSTRG.28946.¿gene_id | MSTRG.28946; |
| 5 StringTie exon      | 16011981 | 16012180 . | - . | transcript_MSTRG.28946.¿gene_id | MSTRG.28946; |
| 5 StringTie exon      | 16016048 | 16016114 . | - . | transcript_MSTRG.28946.¿gene_id | MSTRG.28946; |
| 5 StringTie transcrip | 16012070 | 16016120 . | - . | transcript_MSTRG.28946.¿gene_id | MSTRG.28946; |
| 5 StringTie exon      | 16012070 | 16012180 . | - . | transcript_MSTRG.28946.¿gene_id | MSTRG.28946; |
| 5 StringTie exon      | 16015953 | 16016120 . | - . | transcript_MSTRG.28946.¿gene_id | MSTRG.28946; |
| 5 StringTie transcrip | 16265090 | 16321342 . | - . | transcript_MSTRG.28962.¿gene_id | MSTRG.28962; |
| 5 StringTie exon      | 16265090 | 16265107 . | - . | transcript_MSTRG.28962.¿gene_id | MSTRG.28962; |
| 5 StringTie exon      | 16320973 | 16321342 . | - . | transcript_MSTRG.28962.¿gene_id | MSTRG.28962; |
| 5 StringTie transcrip | 19196497 | 19197119 . | - . | transcript_MSTRG.29032.¿gene_id | MSTRG.29032; |
| 5 StringTie exon      | 19196497 | 19196555 . | - . | transcript_MSTRG.29032.¿gene_id | MSTRG.29032; |
| 5 StringTie exon      | 19196633 | 19197119 . | - . | transcript_MSTRG.29032.¿gene_id | MSTRG.29032; |
| 5 StringTie transcrip | 19211066 | 19212779 . | - . | transcript_MSTRG.29039.¿gene_id | MSTRG.29039; |
| 5 StringTie exon      | 19211066 | 19212053 . | - . | transcript_MSTRG.29039.¿gene_id | MSTRG.29039; |
| 5 StringTie exon      | 19212489 | 19212779 . | - . | transcript_MSTRG.29039.¿gene_id | MSTRG.29039; |
| 5 StringTie transcrip | 19290184 | 19293598 . | - . | transcript_MSTRG.29043.¿gene_id | MSTRG.29043; |
| 5 StringTie exon      | 19290184 | 19292060 . | - . | transcript_MSTRG.29043.¿gene_id | MSTRG.29043; |
| 5 StringTie exon      | 19292854 | 19293598 . | - . | transcript_MSTRG.29043.¿gene_id | MSTRG.29043; |
| 5 StringTie transcrip | 21529880 | 21545040 . | - . | transcript_MSTRG.29105.¿gene_id | MSTRG.29105; |

|                       |          |            |     |                                 |              |
|-----------------------|----------|------------|-----|---------------------------------|--------------|
| 5 StringTie exon      | 21529880 | 21530259 . | - . | transcript_MSTRG.29105.lgene_id | MSTRG.29105; |
| 5 StringTie exon      | 21536633 | 21536897 . | - . | transcript_MSTRG.29105.lgene_id | MSTRG.29105; |
| 5 StringTie exon      | 21538638 | 21538759 . | - . | transcript_MSTRG.29105.lgene_id | MSTRG.29105; |
| 5 StringTie exon      | 21543057 | 21543230 . | - . | transcript_MSTRG.29105.lgene_id | MSTRG.29105; |
| 5 StringTie exon      | 21544169 | 21545040 . | - . | transcript_MSTRG.29105.lgene_id | MSTRG.29105; |
| 5 StringTie transcrip | 21529895 | 21543231 . | - . | transcript_MSTRG.29105.lgene_id | MSTRG.29105; |
| 5 StringTie exon      | 21529895 | 21530259 . | - . | transcript_MSTRG.29105.lgene_id | MSTRG.29105; |
| 5 StringTie exon      | 21536633 | 21538759 . | - . | transcript_MSTRG.29105.lgene_id | MSTRG.29105; |
| 5 StringTie exon      | 21543057 | 21543231 . | - . | transcript_MSTRG.29105.lgene_id | MSTRG.29105; |
| 5 StringTie transcrip | 21532921 | 21542248 . | - . | transcript_MSTRG.29105.lgene_id | MSTRG.29105; |
| 5 StringTie exon      | 21532921 | 21532994 . | - . | transcript_MSTRG.29105.lgene_id | MSTRG.29105; |
| 5 StringTie exon      | 21536633 | 21542248 . | - . | transcript_MSTRG.29105.lgene_id | MSTRG.29105; |
| 5 StringTie transcrip | 24872428 | 24874957 . | - . | transcript_MSTRG.29281.lgene_id | MSTRG.29281; |
| 5 StringTie exon      | 24872428 | 24874223 . | - . | transcript_MSTRG.29281.lgene_id | MSTRG.29281; |
| 5 StringTie exon      | 24874540 | 24874957 . | - . | transcript_MSTRG.29281.lgene_id | MSTRG.29281; |
| 5 StringTie transcrip | 34375861 | 34384546 . | - . | transcript_MSTRG.29435.lgene_id | MSTRG.29435; |
| 5 StringTie exon      | 34375861 | 34376738 . | - . | transcript_MSTRG.29435.lgene_id | MSTRG.29435; |
| 5 StringTie exon      | 34384211 | 34384546 . | - . | transcript_MSTRG.29435.lgene_id | MSTRG.29435; |
| 5 StringTie transcrip | 34423300 | 34424201 . | - . | transcript_MSTRG.29446.lgene_id | MSTRG.29446; |
| 5 StringTie exon      | 34423300 | 34423805 . | - . | transcript_MSTRG.29446.lgene_id | MSTRG.29446; |
| 5 StringTie exon      | 34424093 | 34424201 . | - . | transcript_MSTRG.29446.lgene_id | MSTRG.29446; |
| 5 StringTie transcrip | 34721915 | 34730997 . | - . | transcript_MSTRG.29454.lgene_id | MSTRG.29454; |
| 5 StringTie exon      | 34721915 | 34722143 . | - . | transcript_MSTRG.29454.lgene_id | MSTRG.29454; |
| 5 StringTie exon      | 34730580 | 34730997 . | - . | transcript_MSTRG.29454.lgene_id | MSTRG.29454; |
| 5 StringTie transcrip | 47335142 | 47403245 . | - . | transcript_MSTRG.29612.lgene_id | MSTRG.29612; |
| 5 StringTie exon      | 47335142 | 47336122 . | - . | transcript_MSTRG.29612.lgene_id | MSTRG.29612; |
| 5 StringTie exon      | 47403174 | 47403245 . | - . | transcript_MSTRG.29612.lgene_id | MSTRG.29612; |
| 5 StringTie transcrip | 49156547 | 49159735 . | - . | transcript_MSTRG.29630.lgene_id | MSTRG.29630; |
| 5 StringTie exon      | 49156547 | 49159247 . | - . | transcript_MSTRG.29630.lgene_id | MSTRG.29630; |
| 5 StringTie exon      | 49159586 | 49159735 . | - . | transcript_MSTRG.29630.lgene_id | MSTRG.29630; |
| 5 StringTie transcrip | 50992737 | 51040469 . | - . | transcript_MSTRG.29729.lgene_id | MSTRG.29729; |
| 5 StringTie exon      | 50992737 | 50992763 . | - . | transcript_MSTRG.29729.lgene_id | MSTRG.29729; |
| 5 StringTie exon      | 51006181 | 51006215 . | - . | transcript_MSTRG.29729.lgene_id | MSTRG.29729; |
| 5 StringTie exon      | 51037127 | 51037211 . | - . | transcript_MSTRG.29729.lgene_id | MSTRG.29729; |
| 5 StringTie exon      | 51040103 | 51040469 . | - . | transcript_MSTRG.29729.lgene_id | MSTRG.29729; |

|                        |          |            |     |                                 |              |
|------------------------|----------|------------|-----|---------------------------------|--------------|
| 5 StringTie transcript | 51670381 | 51671219 . | - . | transcript_MSTRG.29739.lgene_id | MSTRG.29739; |
| 5 StringTie exon       | 51670381 | 51670706 . | - . | transcript_MSTRG.29739.lgene_id | MSTRG.29739; |
| 5 StringTie exon       | 51670754 | 51671219 . | - . | transcript_MSTRG.29739.lgene_id | MSTRG.29739; |
| 5 StringTie transcript | 59712262 | 59727461 . | - . | transcript_MSTRG.29879.lgene_id | MSTRG.29879; |
| 5 StringTie exon       | 59712262 | 59712749 . | - . | transcript_MSTRG.29879.lgene_id | MSTRG.29879; |
| 5 StringTie exon       | 59727351 | 59727461 . | - . | transcript_MSTRG.29879.lgene_id | MSTRG.29879; |
| 5 StringTie transcript | 61910608 | 61972716 . | - . | transcript_MSTRG.29938.lgene_id | MSTRG.29938; |
| 5 StringTie exon       | 61910608 | 61910806 . | - . | transcript_MSTRG.29938.lgene_id | MSTRG.29938; |
| 5 StringTie exon       | 61913250 | 61913350 . | - . | transcript_MSTRG.29938.lgene_id | MSTRG.29938; |
| 5 StringTie exon       | 61946285 | 61946340 . | - . | transcript_MSTRG.29938.lgene_id | MSTRG.29938; |
| 5 StringTie exon       | 61957083 | 61957221 . | - . | transcript_MSTRG.29938.lgene_id | MSTRG.29938; |
| 5 StringTie exon       | 61966567 | 61966635 . | - . | transcript_MSTRG.29938.lgene_id | MSTRG.29938; |
| 5 StringTie exon       | 61972460 | 61972716 . | - . | transcript_MSTRG.29938.lgene_id | MSTRG.29938; |
| 5 StringTie transcript | 61912593 | 61915133 . | - . | transcript_MSTRG.29938.lgene_id | MSTRG.29938; |
| 5 StringTie exon       | 61912593 | 61912668 . | - . | transcript_MSTRG.29938.lgene_id | MSTRG.29938; |
| 5 StringTie exon       | 61913250 | 61913350 . | - . | transcript_MSTRG.29938.lgene_id | MSTRG.29938; |
| 5 StringTie exon       | 61915106 | 61915133 . | - . | transcript_MSTRG.29938.lgene_id | MSTRG.29938; |
| 5 StringTie transcript | 61912594 | 61972630 . | - . | transcript_MSTRG.29938.lgene_id | MSTRG.29938; |
| 5 StringTie exon       | 61912594 | 61912668 . | - . | transcript_MSTRG.29938.lgene_id | MSTRG.29938; |
| 5 StringTie exon       | 61913250 | 61913350 . | - . | transcript_MSTRG.29938.lgene_id | MSTRG.29938; |
| 5 StringTie exon       | 61946285 | 61946340 . | - . | transcript_MSTRG.29938.lgene_id | MSTRG.29938; |
| 5 StringTie exon       | 61957083 | 61957221 . | - . | transcript_MSTRG.29938.lgene_id | MSTRG.29938; |
| 5 StringTie exon       | 61966567 | 61966635 . | - . | transcript_MSTRG.29938.lgene_id | MSTRG.29938; |
| 5 StringTie exon       | 61972460 | 61972630 . | - . | transcript_MSTRG.29938.lgene_id | MSTRG.29938; |
| 5 StringTie transcript | 61913333 | 61972559 . | - . | transcript_MSTRG.29938.lgene_id | MSTRG.29938; |
| 5 StringTie exon       | 61913333 | 61913350 . | - . | transcript_MSTRG.29938.lgene_id | MSTRG.29938; |
| 5 StringTie exon       | 61946285 | 61946340 . | - . | transcript_MSTRG.29938.lgene_id | MSTRG.29938; |
| 5 StringTie exon       | 61957083 | 61957221 . | - . | transcript_MSTRG.29938.lgene_id | MSTRG.29938; |
| 5 StringTie exon       | 61972460 | 61972559 . | - . | transcript_MSTRG.29938.lgene_id | MSTRG.29938; |
| 5 StringTie transcript | 61915236 | 61972608 . | - . | transcript_MSTRG.29938.lgene_id | MSTRG.29938; |
| 5 StringTie exon       | 61915236 | 61915259 . | - . | transcript_MSTRG.29938.lgene_id | MSTRG.29938; |
| 5 StringTie exon       | 61946285 | 61946340 . | - . | transcript_MSTRG.29938.lgene_id | MSTRG.29938; |
| 5 StringTie exon       | 61957083 | 61957221 . | - . | transcript_MSTRG.29938.lgene_id | MSTRG.29938; |
| 5 StringTie exon       | 61966567 | 61966635 . | - . | transcript_MSTRG.29938.lgene_id | MSTRG.29938; |
| 5 StringTie exon       | 61972460 | 61972608 . | - . | transcript_MSTRG.29938.lgene_id | MSTRG.29938; |

|                        |          |          |   |   |   |                         |          |              |
|------------------------|----------|----------|---|---|---|-------------------------|----------|--------------|
| 5 StringTie transcript | 61923174 | 61972749 | . | - | . | transcript_MSTRG.29938. | {gene_id | MSTRG.29938; |
| 5 StringTie exon       | 61923174 | 61925675 | . | - | . | transcript_MSTRG.29938. | {gene_id | MSTRG.29938; |
| 5 StringTie exon       | 61928911 | 61929058 | . | - | . | transcript_MSTRG.29938. | {gene_id | MSTRG.29938; |
| 5 StringTie exon       | 61946285 | 61946340 | . | - | . | transcript_MSTRG.29938. | {gene_id | MSTRG.29938; |
| 5 StringTie exon       | 61957083 | 61957221 | . | - | . | transcript_MSTRG.29938. | {gene_id | MSTRG.29938; |
| 5 StringTie exon       | 61966567 | 61966635 | . | - | . | transcript_MSTRG.29938. | {gene_id | MSTRG.29938; |
| 5 StringTie exon       | 61972460 | 61972749 | . | - | . | transcript_MSTRG.29938. | {gene_id | MSTRG.29938; |
| 5 StringTie transcript | 61923188 | 61972738 | . | - | . | transcript_MSTRG.29938. | {gene_id | MSTRG.29938; |
| 5 StringTie exon       | 61923188 | 61925675 | . | - | . | transcript_MSTRG.29938. | {gene_id | MSTRG.29938; |
| 5 StringTie exon       | 61946285 | 61946340 | . | - | . | transcript_MSTRG.29938. | {gene_id | MSTRG.29938; |
| 5 StringTie exon       | 61957083 | 61957221 | . | - | . | transcript_MSTRG.29938. | {gene_id | MSTRG.29938; |
| 5 StringTie exon       | 61966567 | 61966635 | . | - | . | transcript_MSTRG.29938. | {gene_id | MSTRG.29938; |
| 5 StringTie exon       | 61972460 | 61972738 | . | - | . | transcript_MSTRG.29938. | {gene_id | MSTRG.29938; |
| 5 StringTie transcript | 61923206 | 61972559 | . | - | . | transcript_MSTRG.29938. | {gene_id | MSTRG.29938; |
| 5 StringTie exon       | 61923206 | 61925675 | . | - | . | transcript_MSTRG.29938. | {gene_id | MSTRG.29938; |
| 5 StringTie exon       | 61957083 | 61957221 | . | - | . | transcript_MSTRG.29938. | {gene_id | MSTRG.29938; |
| 5 StringTie exon       | 61966567 | 61966635 | . | - | . | transcript_MSTRG.29938. | {gene_id | MSTRG.29938; |
| 5 StringTie exon       | 61972460 | 61972559 | . | - | . | transcript_MSTRG.29938. | {gene_id | MSTRG.29938; |
| 5 StringTie transcript | 61953677 | 61972716 | . | - | . | transcript_MSTRG.29938. | {gene_id | MSTRG.29938; |
| 5 StringTie exon       | 61953677 | 61955289 | . | - | . | transcript_MSTRG.29938. | {gene_id | MSTRG.29938; |
| 5 StringTie exon       | 61957083 | 61957221 | . | - | . | transcript_MSTRG.29938. | {gene_id | MSTRG.29938; |
| 5 StringTie exon       | 61966567 | 61966635 | . | - | . | transcript_MSTRG.29938. | {gene_id | MSTRG.29938; |
| 5 StringTie exon       | 61972460 | 61972716 | . | - | . | transcript_MSTRG.29938. | {gene_id | MSTRG.29938; |
| 5 StringTie transcript | 64105293 | 64106001 | . | - | . | transcript_MSTRG.30019. | {gene_id | MSTRG.30019; |
| 5 StringTie exon       | 64105293 | 64105515 | . | - | . | transcript_MSTRG.30019. | {gene_id | MSTRG.30019; |
| 5 StringTie exon       | 64105723 | 64106001 | . | - | . | transcript_MSTRG.30019. | {gene_id | MSTRG.30019; |
| 5 StringTie transcript | 70422012 | 70423323 | . | - | . | transcript_MSTRG.30146. | {gene_id | MSTRG.30146; |
| 5 StringTie exon       | 70422012 | 70422734 | . | - | . | transcript_MSTRG.30146. | {gene_id | MSTRG.30146; |
| 5 StringTie exon       | 70422994 | 70423323 | . | - | . | transcript_MSTRG.30146. | {gene_id | MSTRG.30146; |
| 5 StringTie transcript | 77933968 | 77936406 | . | - | . | transcript_MSTRG.30248. | {gene_id | MSTRG.30248; |
| 5 StringTie exon       | 77933968 | 77935747 | . | - | . | transcript_MSTRG.30248. | {gene_id | MSTRG.30248; |
| 5 StringTie exon       | 77936261 | 77936406 | . | - | . | transcript_MSTRG.30248. | {gene_id | MSTRG.30248; |
| 5 StringTie transcript | 77934000 | 77936365 | . | - | . | transcript_MSTRG.30248. | {gene_id | MSTRG.30248; |
| 5 StringTie exon       | 77934000 | 77935747 | . | - | . | transcript_MSTRG.30248. | {gene_id | MSTRG.30248; |
| 5 StringTie exon       | 77936247 | 77936365 | . | - | . | transcript_MSTRG.30248. | {gene_id | MSTRG.30248; |



|                       |          |          |   |   |   |                                 |              |
|-----------------------|----------|----------|---|---|---|---------------------------------|--------------|
| 5 StringTie transcrip | 77935316 | 77936345 | . | - | . | transcript_MSTRG.30248.1gene_id | MSTRG.30248; |
| 5 StringTie exon      | 77935316 | 77936047 | . | - | . | transcript_MSTRG.30248.1gene_id | MSTRG.30248; |
| 5 StringTie exon      | 77936261 | 77936345 | . | - | . | transcript_MSTRG.30248.1gene_id | MSTRG.30248; |
| 5 StringTie transcrip | 82751891 | 82754980 | . | - | . | transcript_MSTRG.30387.1gene_id | MSTRG.30387; |
| 5 StringTie exon      | 82751891 | 82752040 | . | - | . | transcript_MSTRG.30387.1gene_id | MSTRG.30387; |
| 5 StringTie exon      | 82754872 | 82754980 | . | - | . | transcript_MSTRG.30387.1gene_id | MSTRG.30387; |
| 5 StringTie transcrip | 86814194 | 86814771 | . | - | . | transcript_MSTRG.30425.1gene_id | MSTRG.30425; |
| 5 StringTie exon      | 86814194 | 86814391 | . | - | . | transcript_MSTRG.30425.1gene_id | MSTRG.30425; |
| 5 StringTie exon      | 86814640 | 86814771 | . | - | . | transcript_MSTRG.30425.1gene_id | MSTRG.30425; |
| 5 StringTie transcrip | 89240156 | 89241476 | . | - | . | transcript_MSTRG.30497.1gene_id | MSTRG.30497; |
| 5 StringTie exon      | 89240156 | 89240380 | . | - | . | transcript_MSTRG.30497.1gene_id | MSTRG.30497; |
| 5 StringTie exon      | 89241456 | 89241476 | . | - | . | transcript_MSTRG.30497.1gene_id | MSTRG.30497; |
| 5 StringTie transcrip | 89285487 | 89301931 | . | - | . | transcript_MSTRG.30507.1gene_id | MSTRG.30507; |
| 5 StringTie exon      | 89285487 | 89285579 | . | - | . | transcript_MSTRG.30507.1gene_id | MSTRG.30507; |
| 5 StringTie exon      | 89286740 | 89286799 | . | - | . | transcript_MSTRG.30507.1gene_id | MSTRG.30507; |
| 5 StringTie exon      | 89295168 | 89295346 | . | - | . | transcript_MSTRG.30507.1gene_id | MSTRG.30507; |
| 5 StringTie exon      | 89301806 | 89301931 | . | - | . | transcript_MSTRG.30507.1gene_id | MSTRG.30507; |
| 5 StringTie transcrip | 90498102 | 90516427 | . | - | . | transcript_MSTRG.30565.1gene_id | MSTRG.30565; |
| 5 StringTie exon      | 90498102 | 90498996 | . | - | . | transcript_MSTRG.30565.1gene_id | MSTRG.30565; |
| 5 StringTie exon      | 90515733 | 90516427 | . | - | . | transcript_MSTRG.30565.1gene_id | MSTRG.30565; |
| 5 StringTie transcrip | 91549028 | 91558714 | . | - | . | transcript_MSTRG.30568.1gene_id | MSTRG.30568; |
| 5 StringTie exon      | 91549028 | 91549127 | . | - | . | transcript_MSTRG.30568.1gene_id | MSTRG.30568; |
| 5 StringTie exon      | 91558562 | 91558714 | . | - | . | transcript_MSTRG.30568.1gene_id | MSTRG.30568; |
| 5 StringTie transcrip | 99210834 | 99227168 | . | - | . | transcript_MSTRG.30645.1gene_id | MSTRG.30645; |
| 5 StringTie exon      | 99210834 | 99211198 | . | - | . | transcript_MSTRG.30645.1gene_id | MSTRG.30645; |
| 5 StringTie exon      | 99226562 | 99227168 | . | - | . | transcript_MSTRG.30645.1gene_id | MSTRG.30645; |
| 6 StringTie transcrip | 3772143  | 3773225  | . | + | . | transcript_MSTRG.30790.1gene_id | MSTRG.30790; |
| 6 StringTie exon      | 3772143  | 3772345  | . | + | . | transcript_MSTRG.30790.1gene_id | MSTRG.30790; |
| 6 StringTie exon      | 3772829  | 3773225  | . | + | . | transcript_MSTRG.30790.1gene_id | MSTRG.30790; |
| 6 StringTie transcrip | 10745568 | 10753095 | . | + | . | transcript_MSTRG.30894.1gene_id | MSTRG.30894; |
| 6 StringTie exon      | 10745568 | 10745702 | . | + | . | transcript_MSTRG.30894.1gene_id | MSTRG.30894; |
| 6 StringTie exon      | 10753023 | 10753095 | . | + | . | transcript_MSTRG.30894.1gene_id | MSTRG.30894; |
| 6 StringTie transcrip | 13674896 | 13675970 | . | + | . | transcript_MSTRG.30986.1gene_id | MSTRG.30986; |
| 6 StringTie exon      | 13674896 | 13675150 | . | + | . | transcript_MSTRG.30986.1gene_id | MSTRG.30986; |
| 6 StringTie exon      | 13675814 | 13675970 | . | + | . | transcript_MSTRG.30986.1gene_id | MSTRG.30986; |

|                        |          |          |   |   |   |                                 |              |
|------------------------|----------|----------|---|---|---|---------------------------------|--------------|
| 6 StringTie transcript | 17673287 | 17681836 | . | + | . | transcript_MSTRG.31030.lgene_id | MSTRG.31030; |
| 6 StringTie exon       | 17673287 | 17673319 | . | + | . | transcript_MSTRG.31030.lgene_id | MSTRG.31030; |
| 6 StringTie exon       | 17677823 | 17681836 | . | + | . | transcript_MSTRG.31030.lgene_id | MSTRG.31030; |
| 6 StringTie transcript | 18335933 | 18338738 | . | + | . | transcript_MSTRG.31035.lgene_id | MSTRG.31035; |
| 6 StringTie exon       | 18335933 | 18336006 | . | + | . | transcript_MSTRG.31035.lgene_id | MSTRG.31035; |
| 6 StringTie exon       | 18336240 | 18338738 | . | + | . | transcript_MSTRG.31035.lgene_id | MSTRG.31035; |
| 6 StringTie transcript | 26233953 | 26235815 | . | + | . | transcript_MSTRG.31103.lgene_id | MSTRG.31103; |
| 6 StringTie exon       | 26233953 | 26234142 | . | + | . | transcript_MSTRG.31103.lgene_id | MSTRG.31103; |
| 6 StringTie exon       | 26235704 | 26235815 | . | + | . | transcript_MSTRG.31103.lgene_id | MSTRG.31103; |
| 6 StringTie transcript | 27727638 | 27733899 | . | + | . | transcript_MSTRG.31140.lgene_id | MSTRG.31140; |
| 6 StringTie exon       | 27727638 | 27728283 | . | + | . | transcript_MSTRG.31140.lgene_id | MSTRG.31140; |
| 6 StringTie exon       | 27733580 | 27733899 | . | + | . | transcript_MSTRG.31140.lgene_id | MSTRG.31140; |
| 6 StringTie transcript | 30562254 | 30568110 | . | + | . | transcript_MSTRG.31229.lgene_id | MSTRG.31229; |
| 6 StringTie exon       | 30562254 | 30563345 | . | + | . | transcript_MSTRG.31229.lgene_id | MSTRG.31229; |
| 6 StringTie exon       | 30563569 | 30563615 | . | + | . | transcript_MSTRG.31229.lgene_id | MSTRG.31229; |
| 6 StringTie exon       | 30568053 | 30568110 | . | + | . | transcript_MSTRG.31229.lgene_id | MSTRG.31229; |
| 6 StringTie transcript | 30568385 | 30570979 | . | + | . | transcript_MSTRG.31227.lgene_id | MSTRG.31227; |
| 6 StringTie exon       | 30568385 | 30568505 | . | + | . | transcript_MSTRG.31227.lgene_id | MSTRG.31227; |
| 6 StringTie exon       | 30570645 | 30570979 | . | + | . | transcript_MSTRG.31227.lgene_id | MSTRG.31227; |
| 6 StringTie transcript | 43085883 | 43087500 | . | + | . | transcript_MSTRG.31354.lgene_id | MSTRG.31354; |
| 6 StringTie exon       | 43085883 | 43086398 | . | + | . | transcript_MSTRG.31354.lgene_id | MSTRG.31354; |
| 6 StringTie exon       | 43086869 | 43087500 | . | + | . | transcript_MSTRG.31354.lgene_id | MSTRG.31354; |
| 6 StringTie transcript | 43085883 | 43087531 | . | + | . | transcript_MSTRG.31354.lgene_id | MSTRG.31354; |
| 6 StringTie exon       | 43085883 | 43086215 | . | + | . | transcript_MSTRG.31354.lgene_id | MSTRG.31354; |
| 6 StringTie exon       | 43086869 | 43087531 | . | + | . | transcript_MSTRG.31354.lgene_id | MSTRG.31354; |
| 6 StringTie transcript | 43087646 | 43090630 | . | + | . | transcript_MSTRG.31355.lgene_id | MSTRG.31355; |
| 6 StringTie exon       | 43087646 | 43087837 | . | + | . | transcript_MSTRG.31355.lgene_id | MSTRG.31355; |
| 6 StringTie exon       | 43090482 | 43090630 | . | + | . | transcript_MSTRG.31355.lgene_id | MSTRG.31355; |
| 6 StringTie transcript | 48231448 | 48239613 | . | + | . | transcript_MSTRG.31613.lgene_id | MSTRG.31613; |
| 6 StringTie exon       | 48231448 | 48232278 | . | + | . | transcript_MSTRG.31613.lgene_id | MSTRG.31613; |
| 6 StringTie exon       | 48232617 | 48232824 | . | + | . | transcript_MSTRG.31613.lgene_id | MSTRG.31613; |
| 6 StringTie exon       | 48236268 | 48239613 | . | + | . | transcript_MSTRG.31613.lgene_id | MSTRG.31613; |
| 6 StringTie transcript | 48713347 | 48722357 | . | + | . | transcript_MSTRG.31634.lgene_id | MSTRG.31634; |
| 6 StringTie exon       | 48713347 | 48713452 | . | + | . | transcript_MSTRG.31634.lgene_id | MSTRG.31634; |
| 6 StringTie exon       | 48719984 | 48720178 | . | + | . | transcript_MSTRG.31634.lgene_id | MSTRG.31634; |

|                       |          |          |   |   |   |                                 |              |
|-----------------------|----------|----------|---|---|---|---------------------------------|--------------|
| 6 StringTie exon      | 48721541 | 48722357 | . | + | . | transcript_MSTRG.31634.lgene_id | MSTRG.31634; |
| 6 StringTie transcrip | 49063715 | 49083320 | . | + | . | transcript_MSTRG.31663.lgene_id | MSTRG.31663; |
| 6 StringTie exon      | 49063715 | 49063947 | . | + | . | transcript_MSTRG.31663.lgene_id | MSTRG.31663; |
| 6 StringTie exon      | 49065666 | 49065786 | . | + | . | transcript_MSTRG.31663.lgene_id | MSTRG.31663; |
| 6 StringTie exon      | 49083254 | 49083320 | . | + | . | transcript_MSTRG.31663.lgene_id | MSTRG.31663; |
| 6 StringTie transcrip | 50569762 | 50571747 | . | + | . | transcript_MSTRG.31742.lgene_id | MSTRG.31742; |
| 6 StringTie exon      | 50569762 | 50569853 | . | + | . | transcript_MSTRG.31742.lgene_id | MSTRG.31742; |
| 6 StringTie exon      | 50571620 | 50571747 | . | + | . | transcript_MSTRG.31742.lgene_id | MSTRG.31742; |
| 6 StringTie transcrip | 54061493 | 54068338 | . | + | . | transcript_MSTRG.31936.lgene_id | MSTRG.31936; |
| 6 StringTie exon      | 54061493 | 54061586 | . | + | . | transcript_MSTRG.31936.lgene_id | MSTRG.31936; |
| 6 StringTie exon      | 54068223 | 54068338 | . | + | . | transcript_MSTRG.31936.lgene_id | MSTRG.31936; |
| 6 StringTie transcrip | 57085514 | 57093420 | . | + | . | transcript_MSTRG.32090.lgene_id | MSTRG.32090; |
| 6 StringTie exon      | 57085514 | 57086794 | . | + | . | transcript_MSTRG.32090.lgene_id | MSTRG.32090; |
| 6 StringTie exon      | 57092334 | 57092579 | . | + | . | transcript_MSTRG.32090.lgene_id | MSTRG.32090; |
| 6 StringTie exon      | 57093248 | 57093420 | . | + | . | transcript_MSTRG.32090.lgene_id | MSTRG.32090; |
| 6 StringTie transcrip | 57085778 | 57093345 | . | + | . | transcript_MSTRG.32090.lgene_id | MSTRG.32090; |
| 6 StringTie exon      | 57085778 | 57086794 | . | + | . | transcript_MSTRG.32090.lgene_id | MSTRG.32090; |
| 6 StringTie exon      | 57093268 | 57093345 | . | + | . | transcript_MSTRG.32090.lgene_id | MSTRG.32090; |
| 6 StringTie transcrip | 57091147 | 57116060 | . | + | . | transcript_MSTRG.32092.lgene_id | MSTRG.32092; |
| 6 StringTie exon      | 57091147 | 57091251 | . | + | . | transcript_MSTRG.32092.lgene_id | MSTRG.32092; |
| 6 StringTie exon      | 57115955 | 57116060 | . | + | . | transcript_MSTRG.32092.lgene_id | MSTRG.32092; |
| 6 StringTie transcrip | 57092705 | 57118651 | . | + | . | transcript_MSTRG.32093.lgene_id | MSTRG.32093; |
| 6 StringTie exon      | 57092705 | 57093023 | . | + | . | transcript_MSTRG.32093.lgene_id | MSTRG.32093; |
| 6 StringTie exon      | 57118398 | 57118651 | . | + | . | transcript_MSTRG.32093.lgene_id | MSTRG.32093; |
| 6 StringTie transcrip | 57093730 | 57094674 | . | + | . | transcript_MSTRG.32094.lgene_id | MSTRG.32094; |
| 6 StringTie exon      | 57093730 | 57093801 | . | + | . | transcript_MSTRG.32094.lgene_id | MSTRG.32094; |
| 6 StringTie exon      | 57094106 | 57094674 | . | + | . | transcript_MSTRG.32094.lgene_id | MSTRG.32094; |
| 6 StringTie transcrip | 57262645 | 57264310 | . | + | . | transcript_MSTRG.32068.lgene_id | MSTRG.32068; |
| 6 StringTie exon      | 57262645 | 57262714 | . | + | . | transcript_MSTRG.32068.lgene_id | MSTRG.32068; |
| 6 StringTie exon      | 57263576 | 57264310 | . | + | . | transcript_MSTRG.32068.lgene_id | MSTRG.32068; |
| 6 StringTie transcrip | 57263401 | 57264529 | . | + | . | transcript_MSTRG.32068.lgene_id | MSTRG.32068; |
| 6 StringTie exon      | 57263401 | 57263474 | . | + | . | transcript_MSTRG.32068.lgene_id | MSTRG.32068; |
| 6 StringTie exon      | 57263576 | 57264529 | . | + | . | transcript_MSTRG.32068.lgene_id | MSTRG.32068; |
| 6 StringTie transcrip | 57297256 | 57299675 | . | + | . | transcript_MSTRG.32081.lgene_id | MSTRG.32081; |
| 6 StringTie exon      | 57297256 | 57297462 | . | + | . | transcript_MSTRG.32081.lgene_id | MSTRG.32081; |

|                       |          |          |   |   |   |                                 |              |
|-----------------------|----------|----------|---|---|---|---------------------------------|--------------|
| 6 StringTie exon      | 57299143 | 57299675 | . | + | . | transcript_MSTRG.32081.lgene_id | MSTRG.32081; |
| 6 StringTie transcrip | 59593578 | 59597688 | . | + | . | transcript_MSTRG.32215.lgene_id | MSTRG.32215; |
| 6 StringTie exon      | 59593578 | 59593661 | . | + | . | transcript_MSTRG.32215.lgene_id | MSTRG.32215; |
| 6 StringTie exon      | 59597382 | 59597688 | . | + | . | transcript_MSTRG.32215.lgene_id | MSTRG.32215; |
| 6 StringTie transcrip | 61849276 | 61852249 | . | + | . | transcript_MSTRG.32322.lgene_id | MSTRG.32322; |
| 6 StringTie exon      | 61849276 | 61849397 | . | + | . | transcript_MSTRG.32322.lgene_id | MSTRG.32322; |
| 6 StringTie exon      | 61852163 | 61852249 | . | + | . | transcript_MSTRG.32322.lgene_id | MSTRG.32322; |
| 6 StringTie transcrip | 62644069 | 62644950 | . | + | . | transcript_MSTRG.32394.lgene_id | MSTRG.32394; |
| 6 StringTie exon      | 62644069 | 62644617 | . | + | . | transcript_MSTRG.32394.lgene_id | MSTRG.32394; |
| 6 StringTie exon      | 62644663 | 62644950 | . | + | . | transcript_MSTRG.32394.lgene_id | MSTRG.32394; |
| 6 StringTie transcrip | 69396224 | 69397240 | . | + | . | transcript_MSTRG.32537.lgene_id | MSTRG.32537; |
| 6 StringTie exon      | 69396224 | 69396455 | . | + | . | transcript_MSTRG.32537.lgene_id | MSTRG.32537; |
| 6 StringTie exon      | 69397194 | 69397240 | . | + | . | transcript_MSTRG.32537.lgene_id | MSTRG.32537; |
| 6 StringTie transcrip | 69561989 | 69563635 | . | + | . | transcript_MSTRG.32543.lgene_id | MSTRG.32543; |
| 6 StringTie exon      | 69561989 | 69562592 | . | + | . | transcript_MSTRG.32543.lgene_id | MSTRG.32543; |
| 6 StringTie exon      | 69562617 | 69563635 | . | + | . | transcript_MSTRG.32543.lgene_id | MSTRG.32543; |
| 6 StringTie transcrip | 69567813 | 69578970 | . | + | . | transcript_MSTRG.32544.lgene_id | MSTRG.32544; |
| 6 StringTie exon      | 69567813 | 69568218 | . | + | . | transcript_MSTRG.32544.lgene_id | MSTRG.32544; |
| 6 StringTie exon      | 69577230 | 69578970 | . | + | . | transcript_MSTRG.32544.lgene_id | MSTRG.32544; |
| 6 StringTie transcrip | 71235290 | 71236392 | . | + | . | transcript_MSTRG.32596.lgene_id | MSTRG.32596; |
| 6 StringTie exon      | 71235290 | 71235381 | . | + | . | transcript_MSTRG.32596.lgene_id | MSTRG.32596; |
| 6 StringTie exon      | 71236197 | 71236392 | . | + | . | transcript_MSTRG.32596.lgene_id | MSTRG.32596; |
| 6 StringTie transcrip | 72544519 | 72559548 | . | + | . | transcript_MSTRG.32628.lgene_id | MSTRG.32628; |
| 6 StringTie exon      | 72544519 | 72544743 | . | + | . | transcript_MSTRG.32628.lgene_id | MSTRG.32628; |
| 6 StringTie exon      | 72558498 | 72559548 | . | + | . | transcript_MSTRG.32628.lgene_id | MSTRG.32628; |
| 6 StringTie transcrip | 72557006 | 72559515 | . | + | . | transcript_MSTRG.32628.lgene_id | MSTRG.32628; |
| 6 StringTie exon      | 72557006 | 72558003 | . | + | . | transcript_MSTRG.32628.lgene_id | MSTRG.32628; |
| 6 StringTie exon      | 72558498 | 72559515 | . | + | . | transcript_MSTRG.32628.lgene_id | MSTRG.32628; |
| 6 StringTie transcrip | 72560102 | 72580706 | . | + | . | transcript_MSTRG.32630.lgene_id | MSTRG.32630; |
| 6 StringTie exon      | 72560102 | 72561802 | . | + | . | transcript_MSTRG.32630.lgene_id | MSTRG.32630; |
| 6 StringTie exon      | 72580648 | 72580706 | . | + | . | transcript_MSTRG.32630.lgene_id | MSTRG.32630; |
| 6 StringTie transcrip | 77708215 | 77729680 | . | + | . | transcript_MSTRG.32738.lgene_id | MSTRG.32738; |
| 6 StringTie exon      | 77708215 | 77708246 | . | + | . | transcript_MSTRG.32738.lgene_id | MSTRG.32738; |
| 6 StringTie exon      | 77729128 | 77729680 | . | + | . | transcript_MSTRG.32738.lgene_id | MSTRG.32738; |
| 6 StringTie transcrip | 79530693 | 79563182 | . | + | . | transcript_MSTRG.32746.lgene_id | MSTRG.32746; |

|                       |          |          |   |   |   |                                 |              |
|-----------------------|----------|----------|---|---|---|---------------------------------|--------------|
| 6 StringTie exon      | 79530693 | 79531456 | . | + | . | transcript_MSTRG.32746.lgene_id | MSTRG.32746; |
| 6 StringTie exon      | 79553399 | 79553541 | . | + | . | transcript_MSTRG.32746.lgene_id | MSTRG.32746; |
| 6 StringTie exon      | 79554860 | 79554957 | . | + | . | transcript_MSTRG.32746.lgene_id | MSTRG.32746; |
| 6 StringTie exon      | 79562593 | 79563182 | . | + | . | transcript_MSTRG.32746.lgene_id | MSTRG.32746; |
| 6 StringTie transcrip | 84417880 | 84430025 | . | + | . | transcript_MSTRG.32906.lgene_id | MSTRG.32906; |
| 6 StringTie exon      | 84417880 | 84418300 | . | + | . | transcript_MSTRG.32906.lgene_id | MSTRG.32906; |
| 6 StringTie exon      | 84419733 | 84419865 | . | + | . | transcript_MSTRG.32906.lgene_id | MSTRG.32906; |
| 6 StringTie exon      | 84429348 | 84430025 | . | + | . | transcript_MSTRG.32906.lgene_id | MSTRG.32906; |
| 6 StringTie transcrip | 84697900 | 84707773 | . | + | . | transcript_MSTRG.32913.lgene_id | MSTRG.32913; |
| 6 StringTie exon      | 84697900 | 84697963 | . | + | . | transcript_MSTRG.32913.lgene_id | MSTRG.32913; |
| 6 StringTie exon      | 84706200 | 84707773 | . | + | . | transcript_MSTRG.32913.lgene_id | MSTRG.32913; |
| 6 StringTie transcrip | 85643321 | 85649266 | . | + | . | transcript_MSTRG.32964.lgene_id | MSTRG.32964; |
| 6 StringTie exon      | 85643321 | 85643386 | . | + | . | transcript_MSTRG.32964.lgene_id | MSTRG.32964; |
| 6 StringTie exon      | 85649084 | 85649266 | . | + | . | transcript_MSTRG.32964.lgene_id | MSTRG.32964; |
| 6 StringTie transcrip | 87951063 | 87951875 | . | + | . | transcript_MSTRG.32986.lgene_id | MSTRG.32986; |
| 6 StringTie exon      | 87951063 | 87951189 | . | + | . | transcript_MSTRG.32986.lgene_id | MSTRG.32986; |
| 6 StringTie exon      | 87951492 | 87951875 | . | + | . | transcript_MSTRG.32986.lgene_id | MSTRG.32986; |
| 6 StringTie transcrip | 88108595 | 88121818 | . | + | . | transcript_MSTRG.32993.lgene_id | MSTRG.32993; |
| 6 StringTie exon      | 88108595 | 88111293 | . | + | . | transcript_MSTRG.32993.lgene_id | MSTRG.32993; |
| 6 StringTie exon      | 88114585 | 88121818 | . | + | . | transcript_MSTRG.32993.lgene_id | MSTRG.32993; |
| 6 StringTie transcrip | 89298403 | 89311500 | . | + | . | transcript_MSTRG.33042.lgene_id | MSTRG.33042; |
| 6 StringTie exon      | 89298403 | 89298958 | . | + | . | transcript_MSTRG.33042.lgene_id | MSTRG.33042; |
| 6 StringTie exon      | 89310955 | 89311500 | . | + | . | transcript_MSTRG.33042.lgene_id | MSTRG.33042; |
| 6 StringTie transcrip | 91822059 | 91823310 | . | + | . | transcript_MSTRG.33081.lgene_id | MSTRG.33081; |
| 6 StringTie exon      | 91822059 | 91822483 | . | + | . | transcript_MSTRG.33081.lgene_id | MSTRG.33081; |
| 6 StringTie exon      | 91822781 | 91823310 | . | + | . | transcript_MSTRG.33081.lgene_id | MSTRG.33081; |
| 6 StringTie transcrip | 94803175 | 94838735 | . | + | . | transcript_MSTRG.33150.lgene_id | MSTRG.33150; |
| 6 StringTie exon      | 94803175 | 94803478 | . | + | . | transcript_MSTRG.33150.lgene_id | MSTRG.33150; |
| 6 StringTie exon      | 94816990 | 94817067 | . | + | . | transcript_MSTRG.33150.lgene_id | MSTRG.33150; |
| 6 StringTie exon      | 94838586 | 94838735 | . | + | . | transcript_MSTRG.33150.lgene_id | MSTRG.33150; |
| 6 StringTie transcrip | 94803175 | 94838735 | . | + | . | transcript_MSTRG.33150.lgene_id | MSTRG.33150; |
| 6 StringTie exon      | 94803175 | 94803478 | . | + | . | transcript_MSTRG.33150.lgene_id | MSTRG.33150; |
| 6 StringTie exon      | 94838586 | 94838735 | . | + | . | transcript_MSTRG.33150.lgene_id | MSTRG.33150; |
| 6 StringTie transcrip | 94803254 | 94838697 | . | + | . | transcript_MSTRG.33150.lgene_id | MSTRG.33150; |
| 6 StringTie exon      | 94803254 | 94803478 | . | + | . | transcript_MSTRG.33150.lgene_id | MSTRG.33150; |

|                        |           |           |   |   |   |                                 |              |
|------------------------|-----------|-----------|---|---|---|---------------------------------|--------------|
| 6 StringTie exon       | 94816535  | 94816676  | . | + | . | transcript_MSTRG.33150.†gene_id | MSTRG.33150; |
| 6 StringTie exon       | 94816990  | 94817067  | . | + | . | transcript_MSTRG.33150.†gene_id | MSTRG.33150; |
| 6 StringTie exon       | 94838586  | 94838697  | . | + | . | transcript_MSTRG.33150.†gene_id | MSTRG.33150; |
| 6 StringTie transcript | 94814539  | 94838735  | . | + | . | transcript_MSTRG.33150.†gene_id | MSTRG.33150; |
| 6 StringTie exon       | 94814539  | 94814808  | . | + | . | transcript_MSTRG.33150.†gene_id | MSTRG.33150; |
| 6 StringTie exon       | 94816990  | 94817067  | . | + | . | transcript_MSTRG.33150.†gene_id | MSTRG.33150; |
| 6 StringTie exon       | 94838586  | 94838735  | . | + | . | transcript_MSTRG.33150.†gene_id | MSTRG.33150; |
| 6 StringTie transcript | 94814539  | 94838884  | . | + | . | transcript_MSTRG.33150.‡gene_id | MSTRG.33150; |
| 6 StringTie exon       | 94814539  | 94814808  | . | + | . | transcript_MSTRG.33150.‡gene_id | MSTRG.33150; |
| 6 StringTie exon       | 94816535  | 94816676  | . | + | . | transcript_MSTRG.33150.‡gene_id | MSTRG.33150; |
| 6 StringTie exon       | 94816990  | 94817067  | . | + | . | transcript_MSTRG.33150.‡gene_id | MSTRG.33150; |
| 6 StringTie exon       | 94838586  | 94838884  | . | + | . | transcript_MSTRG.33150.‡gene_id | MSTRG.33150; |
| 6 StringTie transcript | 94814571  | 94820467  | . | + | . | transcript_MSTRG.33150.†gene_id | MSTRG.33150; |
| 6 StringTie exon       | 94814571  | 94814808  | . | + | . | transcript_MSTRG.33150.†gene_id | MSTRG.33150; |
| 6 StringTie exon       | 94816535  | 94816676  | . | + | . | transcript_MSTRG.33150.†gene_id | MSTRG.33150; |
| 6 StringTie exon       | 94816990  | 94817067  | . | + | . | transcript_MSTRG.33150.†gene_id | MSTRG.33150; |
| 6 StringTie exon       | 94819363  | 94820467  | . | + | . | transcript_MSTRG.33150.†gene_id | MSTRG.33150; |
| 6 StringTie transcript | 94814571  | 94838697  | . | + | . | transcript_MSTRG.33150.†gene_id | MSTRG.33150; |
| 6 StringTie exon       | 94814571  | 94814808  | . | + | . | transcript_MSTRG.33150.†gene_id | MSTRG.33150; |
| 6 StringTie exon       | 94816535  | 94816676  | . | + | . | transcript_MSTRG.33150.†gene_id | MSTRG.33150; |
| 6 StringTie exon       | 94816990  | 94817067  | . | + | . | transcript_MSTRG.33150.†gene_id | MSTRG.33150; |
| 6 StringTie exon       | 94838647  | 94838697  | . | + | . | transcript_MSTRG.33150.†gene_id | MSTRG.33150; |
| 6 StringTie transcript | 99673790  | 99735724  | . | + | . | transcript_MSTRG.33279.‡gene_id | MSTRG.33279; |
| 6 StringTie exon       | 99673790  | 99673837  | . | + | . | transcript_MSTRG.33279.‡gene_id | MSTRG.33279; |
| 6 StringTie exon       | 99734556  | 99735724  | . | + | . | transcript_MSTRG.33279.‡gene_id | MSTRG.33279; |
| 6 StringTie transcript | 100093687 | 100095729 | . | + | . | transcript_MSTRG.33272.‡gene_id | MSTRG.33272; |
| 6 StringTie exon       | 100093687 | 100093739 | . | + | . | transcript_MSTRG.33272.‡gene_id | MSTRG.33272; |
| 6 StringTie exon       | 100095341 | 100095729 | . | + | . | transcript_MSTRG.33272.‡gene_id | MSTRG.33272; |
| 6 StringTie transcript | 101795369 | 101798808 | . | + | . | transcript_MSTRG.33295.‡gene_id | MSTRG.33295; |
| 6 StringTie exon       | 101795369 | 101795586 | . | + | . | transcript_MSTRG.33295.‡gene_id | MSTRG.33295; |
| 6 StringTie exon       | 101798736 | 101798808 | . | + | . | transcript_MSTRG.33295.‡gene_id | MSTRG.33295; |
| 6 StringTie transcript | 103391661 | 103414915 | . | + | . | transcript_MSTRG.33307.‡gene_id | MSTRG.33307; |
| 6 StringTie exon       | 103391661 | 103391832 | . | + | . | transcript_MSTRG.33307.‡gene_id | MSTRG.33307; |
| 6 StringTie exon       | 103414590 | 103414915 | . | + | . | transcript_MSTRG.33307.‡gene_id | MSTRG.33307; |
| 6 StringTie transcript | 103391722 | 103414770 | . | + | . | transcript_MSTRG.33307.†gene_id | MSTRG.33307; |

|                        |           |           |   |   |   |                                 |              |
|------------------------|-----------|-----------|---|---|---|---------------------------------|--------------|
| 6 StringTie exon       | 103391722 | 103391905 | . | + | . | transcript_MSTRG.33307.¿gene_id | MSTRG.33307; |
| 6 StringTie exon       | 103414663 | 103414770 | . | + | . | transcript_MSTRG.33307.¿gene_id | MSTRG.33307; |
| 6 StringTie transcript | 106314743 | 106347679 | . | + | . | transcript_MSTRG.33364.¿gene_id | MSTRG.33364; |
| 6 StringTie exon       | 106314743 | 106314771 | . | + | . | transcript_MSTRG.33364.¿gene_id | MSTRG.33364; |
| 6 StringTie exon       | 106346412 | 106347679 | . | + | . | transcript_MSTRG.33364.¿gene_id | MSTRG.33364; |
| 6 StringTie transcript | 106347716 | 106349490 | . | + | . | transcript_MSTRG.33367.¿gene_id | MSTRG.33367; |
| 6 StringTie exon       | 106347716 | 106348274 | . | + | . | transcript_MSTRG.33367.¿gene_id | MSTRG.33367; |
| 6 StringTie exon       | 106348390 | 106349490 | . | + | . | transcript_MSTRG.33367.¿gene_id | MSTRG.33367; |
| 6 StringTie transcript | 109110534 | 109126639 | . | + | . | transcript_MSTRG.33430.¿gene_id | MSTRG.33430; |
| 6 StringTie exon       | 109110534 | 109110767 | . | + | . | transcript_MSTRG.33430.¿gene_id | MSTRG.33430; |
| 6 StringTie exon       | 109111769 | 109111853 | . | + | . | transcript_MSTRG.33430.¿gene_id | MSTRG.33430; |
| 6 StringTie exon       | 109125216 | 109126639 | . | + | . | transcript_MSTRG.33430.¿gene_id | MSTRG.33430; |
| 6 StringTie transcript | 111477180 | 111480657 | . | + | . | transcript_MSTRG.33459.¿gene_id | MSTRG.33459; |
| 6 StringTie exon       | 111477180 | 111477326 | . | + | . | transcript_MSTRG.33459.¿gene_id | MSTRG.33459; |
| 6 StringTie exon       | 111479482 | 111480657 | . | + | . | transcript_MSTRG.33459.¿gene_id | MSTRG.33459; |
| 6 StringTie transcript | 135367993 | 135376194 | . | + | . | transcript_MSTRG.33632.¿gene_id | MSTRG.33632; |
| 6 StringTie exon       | 135367993 | 135372124 | . | + | . | transcript_MSTRG.33632.¿gene_id | MSTRG.33632; |
| 6 StringTie exon       | 135375059 | 135376194 | . | + | . | transcript_MSTRG.33632.¿gene_id | MSTRG.33632; |
| 6 StringTie transcript | 142588990 | 142592375 | . | + | . | transcript_MSTRG.33708.¿gene_id | MSTRG.33708; |
| 6 StringTie exon       | 142588990 | 142589008 | . | + | . | transcript_MSTRG.33708.¿gene_id | MSTRG.33708; |
| 6 StringTie exon       | 142590997 | 142592375 | . | + | . | transcript_MSTRG.33708.¿gene_id | MSTRG.33708; |
| 6 StringTie transcript | 146052103 | 146086714 | . | + | . | transcript_MSTRG.33748.¿gene_id | MSTRG.33748; |
| 6 StringTie exon       | 146052103 | 146052402 | . | + | . | transcript_MSTRG.33748.¿gene_id | MSTRG.33748; |
| 6 StringTie exon       | 146085381 | 146085474 | . | + | . | transcript_MSTRG.33748.¿gene_id | MSTRG.33748; |
| 6 StringTie exon       | 146086689 | 146086714 | . | + | . | transcript_MSTRG.33748.¿gene_id | MSTRG.33748; |
| 6 StringTie transcript | 146142447 | 146157227 | . | + | . | transcript_MSTRG.33783.¿gene_id | MSTRG.33783; |
| 6 StringTie exon       | 146142447 | 146143109 | . | + | . | transcript_MSTRG.33783.¿gene_id | MSTRG.33783; |
| 6 StringTie exon       | 146150171 | 146150281 | . | + | . | transcript_MSTRG.33783.¿gene_id | MSTRG.33783; |
| 6 StringTie exon       | 146157101 | 146157227 | . | + | . | transcript_MSTRG.33783.¿gene_id | MSTRG.33783; |
| 6 StringTie transcript | 165869239 | 165870714 | . | + | . | transcript_MSTRG.34114.¿gene_id | MSTRG.34114; |
| 6 StringTie exon       | 165869239 | 165869381 | . | + | . | transcript_MSTRG.34114.¿gene_id | MSTRG.34114; |
| 6 StringTie exon       | 165870449 | 165870714 | . | + | . | transcript_MSTRG.34114.¿gene_id | MSTRG.34114; |
| 6 StringTie transcript | 168637454 | 168649429 | . | + | . | transcript_MSTRG.34195.¿gene_id | MSTRG.34195; |
| 6 StringTie exon       | 168637454 | 168637641 | . | + | . | transcript_MSTRG.34195.¿gene_id | MSTRG.34195; |
| 6 StringTie exon       | 168642529 | 168642628 | . | + | . | transcript_MSTRG.34195.¿gene_id | MSTRG.34195; |

|                       |           |           |   |   |   |                                 |              |
|-----------------------|-----------|-----------|---|---|---|---------------------------------|--------------|
| 6 StringTie exon      | 168647465 | 168647645 | . | + | . | transcript_MSTRG.34195.lgene_id | MSTRG.34195; |
| 6 StringTie exon      | 168648369 | 168649429 | . | + | . | transcript_MSTRG.34195.lgene_id | MSTRG.34195; |
| 6 StringTie transcrip | 168642285 | 168678887 | . | + | . | transcript_MSTRG.34197.lgene_id | MSTRG.34197; |
| 6 StringTie exon      | 168642285 | 168642317 | . | + | . | transcript_MSTRG.34197.lgene_id | MSTRG.34197; |
| 6 StringTie exon      | 168677970 | 168678887 | . | + | . | transcript_MSTRG.34197.lgene_id | MSTRG.34197; |
| 6 StringTie transcrip | 170485847 | 170492167 | . | + | . | transcript_MSTRG.34238.lgene_id | MSTRG.34238; |
| 6 StringTie exon      | 170485847 | 170485879 | . | + | . | transcript_MSTRG.34238.lgene_id | MSTRG.34238; |
| 6 StringTie exon      | 170491913 | 170492167 | . | + | . | transcript_MSTRG.34238.lgene_id | MSTRG.34238; |
| 6 StringTie transcrip | 170486282 | 170492188 | . | + | . | transcript_MSTRG.34238.lgene_id | MSTRG.34238; |
| 6 StringTie exon      | 170486282 | 170486568 | . | + | . | transcript_MSTRG.34238.lgene_id | MSTRG.34238; |
| 6 StringTie exon      | 170491913 | 170492188 | . | + | . | transcript_MSTRG.34238.lgene_id | MSTRG.34238; |
| 6 StringTie transcrip | 170615301 | 170637300 | . | + | . | transcript_MSTRG.34245.lgene_id | MSTRG.34245; |
| 6 StringTie exon      | 170615301 | 170615446 | . | + | . | transcript_MSTRG.34245.lgene_id | MSTRG.34245; |
| 6 StringTie exon      | 170620189 | 170620312 | . | + | . | transcript_MSTRG.34245.lgene_id | MSTRG.34245; |
| 6 StringTie exon      | 170637004 | 170637300 | . | + | . | transcript_MSTRG.34245.lgene_id | MSTRG.34245; |
| 6 StringTie transcrip | 248014    | 253049    | . | - | . | transcript_MSTRG.30708.lgene_id | MSTRG.30708; |
| 6 StringTie exon      | 248014    | 248320    | . | - | . | transcript_MSTRG.30708.lgene_id | MSTRG.30708; |
| 6 StringTie exon      | 252560    | 253049    | . | - | . | transcript_MSTRG.30708.lgene_id | MSTRG.30708; |
| 6 StringTie transcrip | 3780080   | 3786258   | . | - | . | transcript_MSTRG.30789.lgene_id | MSTRG.30789; |
| 6 StringTie exon      | 3780080   | 3780413   | . | - | . | transcript_MSTRG.30789.lgene_id | MSTRG.30789; |
| 6 StringTie exon      | 3783793   | 3784066   | . | - | . | transcript_MSTRG.30789.lgene_id | MSTRG.30789; |
| 6 StringTie exon      | 3785767   | 3786258   | . | - | . | transcript_MSTRG.30789.lgene_id | MSTRG.30789; |
| 6 StringTie transcrip | 3780184   | 3786266   | . | - | . | transcript_MSTRG.30789.lgene_id | MSTRG.30789; |
| 6 StringTie exon      | 3780184   | 3784066   | . | - | . | transcript_MSTRG.30789.lgene_id | MSTRG.30789; |
| 6 StringTie exon      | 3785767   | 3786266   | . | - | . | transcript_MSTRG.30789.lgene_id | MSTRG.30789; |
| 6 StringTie transcrip | 8463710   | 8466681   | . | - | . | transcript_MSTRG.30882.lgene_id | MSTRG.30882; |
| 6 StringTie exon      | 8463710   | 8466179   | . | - | . | transcript_MSTRG.30882.lgene_id | MSTRG.30882; |
| 6 StringTie exon      | 8466369   | 8466681   | . | - | . | transcript_MSTRG.30882.lgene_id | MSTRG.30882; |
| 6 StringTie transcrip | 12092860  | 12098236  | . | - | . | transcript_MSTRG.30925.lgene_id | MSTRG.30925; |
| 6 StringTie exon      | 12092860  | 12092893  | . | - | . | transcript_MSTRG.30925.lgene_id | MSTRG.30925; |
| 6 StringTie exon      | 12097527  | 12098236  | . | - | . | transcript_MSTRG.30925.lgene_id | MSTRG.30925; |
| 6 StringTie transcrip | 12096289  | 12102756  | . | - | . | transcript_MSTRG.30926.lgene_id | MSTRG.30926; |
| 6 StringTie exon      | 12096289  | 12097190  | . | - | . | transcript_MSTRG.30926.lgene_id | MSTRG.30926; |
| 6 StringTie exon      | 12102610  | 12102756  | . | - | . | transcript_MSTRG.30926.lgene_id | MSTRG.30926; |
| 6 StringTie transcrip | 12623499  | 12634090  | . | - | . | transcript_MSTRG.30942.lgene_id | MSTRG.30942; |



|                       |          |          |   |   |   |                                 |              |
|-----------------------|----------|----------|---|---|---|---------------------------------|--------------|
| 6 StringTie exon      | 12623499 | 12623531 | . | - | . | transcript_MSTRG.30942.lgene_id | MSTRG.30942; |
| 6 StringTie exon      | 12633828 | 12634090 | . | - | . | transcript_MSTRG.30942.lgene_id | MSTRG.30942; |
| 6 StringTie transcrip | 28746508 | 28799258 | . | - | . | transcript_MSTRG.31199.lgene_id | MSTRG.31199; |
| 6 StringTie exon      | 28746508 | 28746862 | . | - | . | transcript_MSTRG.31199.lgene_id | MSTRG.31199; |
| 6 StringTie exon      | 28798898 | 28799258 | . | - | . | transcript_MSTRG.31199.lgene_id | MSTRG.31199; |
| 6 StringTie transcrip | 30149327 | 30156048 | . | - | . | transcript_MSTRG.31220.lgene_id | MSTRG.31220; |
| 6 StringTie exon      | 30149327 | 30150289 | . | - | . | transcript_MSTRG.31220.lgene_id | MSTRG.31220; |
| 6 StringTie exon      | 30155851 | 30156048 | . | - | . | transcript_MSTRG.31220.lgene_id | MSTRG.31220; |
| 6 StringTie transcrip | 36293563 | 36300823 | . | - | . | transcript_MSTRG.31266.lgene_id | MSTRG.31266; |
| 6 StringTie exon      | 36293563 | 36294940 | . | - | . | transcript_MSTRG.31266.lgene_id | MSTRG.31266; |
| 6 StringTie exon      | 36300634 | 36300823 | . | - | . | transcript_MSTRG.31266.lgene_id | MSTRG.31266; |
| 6 StringTie transcrip | 36293563 | 36300845 | . | - | . | transcript_MSTRG.31266.lgene_id | MSTRG.31266; |
| 6 StringTie exon      | 36293563 | 36294935 | . | - | . | transcript_MSTRG.31266.lgene_id | MSTRG.31266; |
| 6 StringTie exon      | 36300634 | 36300845 | . | - | . | transcript_MSTRG.31266.lgene_id | MSTRG.31266; |
| 6 StringTie transcrip | 36294511 | 36300845 | . | - | . | transcript_MSTRG.31266.lgene_id | MSTRG.31266; |
| 6 StringTie exon      | 36294511 | 36294935 | . | - | . | transcript_MSTRG.31266.lgene_id | MSTRG.31266; |
| 6 StringTie exon      | 36297478 | 36297758 | . | - | . | transcript_MSTRG.31266.lgene_id | MSTRG.31266; |
| 6 StringTie exon      | 36300634 | 36300845 | . | - | . | transcript_MSTRG.31266.lgene_id | MSTRG.31266; |
| 6 StringTie transcrip | 36294699 | 36300818 | . | - | . | transcript_MSTRG.31266.lgene_id | MSTRG.31266; |
| 6 StringTie exon      | 36294699 | 36294940 | . | - | . | transcript_MSTRG.31266.lgene_id | MSTRG.31266; |
| 6 StringTie exon      | 36297478 | 36297758 | . | - | . | transcript_MSTRG.31266.lgene_id | MSTRG.31266; |
| 6 StringTie exon      | 36300634 | 36300818 | . | - | . | transcript_MSTRG.31266.lgene_id | MSTRG.31266; |
| 6 StringTie transcrip | 36299795 | 36300818 | . | - | . | transcript_MSTRG.31266.lgene_id | MSTRG.31266; |
| 6 StringTie exon      | 36299795 | 36300183 | . | - | . | transcript_MSTRG.31266.lgene_id | MSTRG.31266; |
| 6 StringTie exon      | 36300634 | 36300818 | . | - | . | transcript_MSTRG.31266.lgene_id | MSTRG.31266; |
| 6 StringTie transcrip | 43585470 | 43587302 | . | - | . | transcript_MSTRG.31372.lgene_id | MSTRG.31372; |
| 6 StringTie exon      | 43585470 | 43585957 | . | - | . | transcript_MSTRG.31372.lgene_id | MSTRG.31372; |
| 6 StringTie exon      | 43586859 | 43587302 | . | - | . | transcript_MSTRG.31372.lgene_id | MSTRG.31372; |
| 6 StringTie transcrip | 44127403 | 44128094 | . | - | . | transcript_MSTRG.31400.lgene_id | MSTRG.31400; |
| 6 StringTie exon      | 44127403 | 44127742 | . | - | . | transcript_MSTRG.31400.lgene_id | MSTRG.31400; |
| 6 StringTie exon      | 44128047 | 44128094 | . | - | . | transcript_MSTRG.31400.lgene_id | MSTRG.31400; |
| 6 StringTie transcrip | 44559414 | 44573768 | . | - | . | transcript_MSTRG.31415.lgene_id | MSTRG.31415; |
| 6 StringTie exon      | 44559414 | 44560935 | . | - | . | transcript_MSTRG.31415.lgene_id | MSTRG.31415; |
| 6 StringTie exon      | 44565370 | 44565452 | . | - | . | transcript_MSTRG.31415.lgene_id | MSTRG.31415; |
| 6 StringTie exon      | 44572769 | 44573768 | . | - | . | transcript_MSTRG.31415.lgene_id | MSTRG.31415; |

|                       |          |            |     |                                 |              |
|-----------------------|----------|------------|-----|---------------------------------|--------------|
| 6 StringTie transcrip | 45557940 | 45688288 . | - . | transcript_MSTRG.31466.lgene_id | MSTRG.31466; |
| 6 StringTie exon      | 45557940 | 45558209 . | - . | transcript_MSTRG.31466.lgene_id | MSTRG.31466; |
| 6 StringTie exon      | 45688210 | 45688288 . | - . | transcript_MSTRG.31466.lgene_id | MSTRG.31466; |
| 6 StringTie transcrip | 47215788 | 47217285 . | - . | transcript_MSTRG.31551.lgene_id | MSTRG.31551; |
| 6 StringTie exon      | 47215788 | 47215806 . | - . | transcript_MSTRG.31551.lgene_id | MSTRG.31551; |
| 6 StringTie exon      | 47216897 | 47217285 . | - . | transcript_MSTRG.31551.lgene_id | MSTRG.31551; |
| 6 StringTie transcrip | 47668839 | 47670903 . | - . | transcript_MSTRG.31579.lgene_id | MSTRG.31579; |
| 6 StringTie exon      | 47668839 | 47669850 . | - . | transcript_MSTRG.31579.lgene_id | MSTRG.31579; |
| 6 StringTie exon      | 47670157 | 47670903 . | - . | transcript_MSTRG.31579.lgene_id | MSTRG.31579; |
| 6 StringTie transcrip | 47671349 | 47672113 . | - . | transcript_MSTRG.31580.lgene_id | MSTRG.31580; |
| 6 StringTie exon      | 47671349 | 47671788 . | - . | transcript_MSTRG.31580.lgene_id | MSTRG.31580; |
| 6 StringTie exon      | 47672044 | 47672113 . | - . | transcript_MSTRG.31580.lgene_id | MSTRG.31580; |
| 6 StringTie transcrip | 49559105 | 49559480 . | - . | transcript_MSTRG.31722.lgene_id | MSTRG.31722; |
| 6 StringTie exon      | 49559105 | 49559187 . | - . | transcript_MSTRG.31722.lgene_id | MSTRG.31722; |
| 6 StringTie exon      | 49559208 | 49559480 . | - . | transcript_MSTRG.31722.lgene_id | MSTRG.31722; |
| 6 StringTie transcrip | 51178666 | 51180874 . | - . | transcript_MSTRG.31773.lgene_id | MSTRG.31773; |
| 6 StringTie exon      | 51178666 | 51178758 . | - . | transcript_MSTRG.31773.lgene_id | MSTRG.31773; |
| 6 StringTie exon      | 51179363 | 51179488 . | - . | transcript_MSTRG.31773.lgene_id | MSTRG.31773; |
| 6 StringTie exon      | 51180782 | 51180874 . | - . | transcript_MSTRG.31773.lgene_id | MSTRG.31773; |
| 6 StringTie transcrip | 51309390 | 51309827 . | - . | transcript_MSTRG.31781.lgene_id | MSTRG.31781; |
| 6 StringTie exon      | 51309390 | 51309500 . | - . | transcript_MSTRG.31781.lgene_id | MSTRG.31781; |
| 6 StringTie exon      | 51309572 | 51309682 . | - . | transcript_MSTRG.31781.lgene_id | MSTRG.31781; |
| 6 StringTie exon      | 51309717 | 51309827 . | - . | transcript_MSTRG.31781.lgene_id | MSTRG.31781; |
| 6 StringTie transcrip | 51310113 | 51310401 . | - . | transcript_MSTRG.31782.lgene_id | MSTRG.31782; |
| 6 StringTie exon      | 51310113 | 51310222 . | - . | transcript_MSTRG.31782.lgene_id | MSTRG.31782; |
| 6 StringTie exon      | 51310291 | 51310401 . | - . | transcript_MSTRG.31782.lgene_id | MSTRG.31782; |
| 6 StringTie transcrip | 54039916 | 54041637 . | - . | transcript_MSTRG.31933.lgene_id | MSTRG.31933; |
| 6 StringTie exon      | 54039916 | 54040608 . | - . | transcript_MSTRG.31933.lgene_id | MSTRG.31933; |
| 6 StringTie exon      | 54041208 | 54041637 . | - . | transcript_MSTRG.31933.lgene_id | MSTRG.31933; |
| 6 StringTie transcrip | 54677318 | 54678162 . | - . | transcript_MSTRG.31972.lgene_id | MSTRG.31972; |
| 6 StringTie exon      | 54677318 | 54677804 . | - . | transcript_MSTRG.31972.lgene_id | MSTRG.31972; |
| 6 StringTie exon      | 54677913 | 54678162 . | - . | transcript_MSTRG.31972.lgene_id | MSTRG.31972; |
| 6 StringTie transcrip | 58237382 | 58242308 . | - . | transcript_MSTRG.32144.lgene_id | MSTRG.32144; |
| 6 StringTie exon      | 58237382 | 58238473 . | - . | transcript_MSTRG.32144.lgene_id | MSTRG.32144; |
| 6 StringTie exon      | 58242245 | 58242308 . | - . | transcript_MSTRG.32144.lgene_id | MSTRG.32144; |

|                        |          |          |   |   |   |                                 |              |
|------------------------|----------|----------|---|---|---|---------------------------------|--------------|
| 6 StringTie transcript | 58237404 | 58242284 | . | - | . | transcript_MSTRG.32144.¿gene_id | MSTRG.32144; |
| 6 StringTie exon       | 58237404 | 58238473 | . | - | . | transcript_MSTRG.32144.¿gene_id | MSTRG.32144; |
| 6 StringTie exon       | 58239305 | 58239562 | . | - | . | transcript_MSTRG.32144.¿gene_id | MSTRG.32144; |
| 6 StringTie exon       | 58241958 | 58242284 | . | - | . | transcript_MSTRG.32144.¿gene_id | MSTRG.32144; |
| 6 StringTie transcript | 58237882 | 58242308 | . | - | . | transcript_MSTRG.32144.¿gene_id | MSTRG.32144; |
| 6 StringTie exon       | 58237882 | 58238473 | . | - | . | transcript_MSTRG.32144.¿gene_id | MSTRG.32144; |
| 6 StringTie exon       | 58239305 | 58239562 | . | - | . | transcript_MSTRG.32144.¿gene_id | MSTRG.32144; |
| 6 StringTie exon       | 58242245 | 58242308 | . | - | . | transcript_MSTRG.32144.¿gene_id | MSTRG.32144; |
| 6 StringTie transcript | 62639677 | 62667578 | . | - | . | transcript_MSTRG.32395.¿gene_id | MSTRG.32395; |
| 6 StringTie exon       | 62639677 | 62639738 | . | - | . | transcript_MSTRG.32395.¿gene_id | MSTRG.32395; |
| 6 StringTie exon       | 62656598 | 62656817 | . | - | . | transcript_MSTRG.32395.¿gene_id | MSTRG.32395; |
| 6 StringTie exon       | 62657966 | 62658084 | . | - | . | transcript_MSTRG.32395.¿gene_id | MSTRG.32395; |
| 6 StringTie exon       | 62660016 | 62660163 | . | - | . | transcript_MSTRG.32395.¿gene_id | MSTRG.32395; |
| 6 StringTie exon       | 62667347 | 62667578 | . | - | . | transcript_MSTRG.32395.¿gene_id | MSTRG.32395; |
| 6 StringTie transcript | 63686247 | 63687882 | . | - | . | transcript_MSTRG.32356.¿gene_id | MSTRG.32356; |
| 6 StringTie exon       | 63686247 | 63686749 | . | - | . | transcript_MSTRG.32356.¿gene_id | MSTRG.32356; |
| 6 StringTie exon       | 63687820 | 63687882 | . | - | . | transcript_MSTRG.32356.¿gene_id | MSTRG.32356; |
| 6 StringTie transcript | 71153018 | 71161066 | . | - | . | transcript_MSTRG.32586.¿gene_id | MSTRG.32586; |
| 6 StringTie exon       | 71153018 | 71157539 | . | - | . | transcript_MSTRG.32586.¿gene_id | MSTRG.32586; |
| 6 StringTie exon       | 71160571 | 71161066 | . | - | . | transcript_MSTRG.32586.¿gene_id | MSTRG.32586; |
| 6 StringTie transcript | 71155565 | 71160819 | . | - | . | transcript_MSTRG.32586.¿gene_id | MSTRG.32586; |
| 6 StringTie exon       | 71155565 | 71156023 | . | - | . | transcript_MSTRG.32586.¿gene_id | MSTRG.32586; |
| 6 StringTie exon       | 71156113 | 71157539 | . | - | . | transcript_MSTRG.32586.¿gene_id | MSTRG.32586; |
| 6 StringTie exon       | 71160571 | 71160819 | . | - | . | transcript_MSTRG.32586.¿gene_id | MSTRG.32586; |
| 6 StringTie transcript | 80912669 | 80978876 | . | - | . | transcript_MSTRG.32774.¿gene_id | MSTRG.32774; |
| 6 StringTie exon       | 80912669 | 80912721 | . | - | . | transcript_MSTRG.32774.¿gene_id | MSTRG.32774; |
| 6 StringTie exon       | 80978094 | 80978876 | . | - | . | transcript_MSTRG.32774.¿gene_id | MSTRG.32774; |
| 6 StringTie transcript | 81192692 | 81194285 | . | - | . | transcript_MSTRG.32772.¿gene_id | MSTRG.32772; |
| 6 StringTie exon       | 81192692 | 81192783 | . | - | . | transcript_MSTRG.32772.¿gene_id | MSTRG.32772; |
| 6 StringTie exon       | 81193846 | 81194285 | . | - | . | transcript_MSTRG.32772.¿gene_id | MSTRG.32772; |
| 6 StringTie transcript | 81772067 | 81798959 | . | - | . | transcript_MSTRG.32817.¿gene_id | MSTRG.32817; |
| 6 StringTie exon       | 81772067 | 81772354 | . | - | . | transcript_MSTRG.32817.¿gene_id | MSTRG.32817; |
| 6 StringTie exon       | 81798701 | 81798959 | . | - | . | transcript_MSTRG.32817.¿gene_id | MSTRG.32817; |
| 6 StringTie transcript | 81796223 | 81798974 | . | - | . | transcript_MSTRG.32817.¿gene_id | MSTRG.32817; |
| 6 StringTie exon       | 81796223 | 81797174 | . | - | . | transcript_MSTRG.32817.¿gene_id | MSTRG.32817; |

|                        |           |           |   |   |   |                                  |              |
|------------------------|-----------|-----------|---|---|---|----------------------------------|--------------|
| 6 StringTie exon       | 81798701  | 81798974  | . | - | . | transcript_MSTRG.32817.1(gene_id | MSTRG.32817; |
| 6 StringTie transcript | 82858753  | 82861565  | . | - | . | transcript_MSTRG.32849.1(gene_id | MSTRG.32849; |
| 6 StringTie exon       | 82858753  | 82859597  | . | - | . | transcript_MSTRG.32849.1(gene_id | MSTRG.32849; |
| 6 StringTie exon       | 82860654  | 82860856  | . | - | . | transcript_MSTRG.32849.1(gene_id | MSTRG.32849; |
| 6 StringTie exon       | 82861441  | 82861565  | . | - | . | transcript_MSTRG.32849.1(gene_id | MSTRG.32849; |
| 6 StringTie transcript | 85593754  | 85597213  | . | - | . | transcript_MSTRG.32955.1(gene_id | MSTRG.32955; |
| 6 StringTie exon       | 85593754  | 85593864  | . | - | . | transcript_MSTRG.32955.1(gene_id | MSTRG.32955; |
| 6 StringTie exon       | 85594326  | 85594377  | . | - | . | transcript_MSTRG.32955.1(gene_id | MSTRG.32955; |
| 6 StringTie exon       | 85594728  | 85594814  | . | - | . | transcript_MSTRG.32955.1(gene_id | MSTRG.32955; |
| 6 StringTie exon       | 85595882  | 85595979  | . | - | . | transcript_MSTRG.32955.1(gene_id | MSTRG.32955; |
| 6 StringTie exon       | 85596470  | 85596517  | . | - | . | transcript_MSTRG.32955.1(gene_id | MSTRG.32955; |
| 6 StringTie exon       | 85596926  | 85597213  | . | - | . | transcript_MSTRG.32955.1(gene_id | MSTRG.32955; |
| 6 StringTie transcript | 89320251  | 89328552  | . | - | . | transcript_MSTRG.33040.1(gene_id | MSTRG.33040; |
| 6 StringTie exon       | 89320251  | 89320277  | . | - | . | transcript_MSTRG.33040.1(gene_id | MSTRG.33040; |
| 6 StringTie exon       | 89327769  | 89328132  | . | - | . | transcript_MSTRG.33040.1(gene_id | MSTRG.33040; |
| 6 StringTie exon       | 89328394  | 89328552  | . | - | . | transcript_MSTRG.33040.1(gene_id | MSTRG.33040; |
| 6 StringTie transcript | 95939214  | 95941487  | . | - | . | transcript_MSTRG.33176.1(gene_id | MSTRG.33176; |
| 6 StringTie exon       | 95939214  | 95940869  | . | - | . | transcript_MSTRG.33176.1(gene_id | MSTRG.33176; |
| 6 StringTie exon       | 95941282  | 95941487  | . | - | . | transcript_MSTRG.33176.1(gene_id | MSTRG.33176; |
| 6 StringTie transcript | 100190463 | 100204085 | . | - | . | transcript_MSTRG.33274.1(gene_id | MSTRG.33274; |
| 6 StringTie exon       | 100190463 | 100190885 | . | - | . | transcript_MSTRG.33274.1(gene_id | MSTRG.33274; |
| 6 StringTie exon       | 100201926 | 100202074 | . | - | . | transcript_MSTRG.33274.1(gene_id | MSTRG.33274; |
| 6 StringTie exon       | 100202561 | 100202696 | . | - | . | transcript_MSTRG.33274.1(gene_id | MSTRG.33274; |
| 6 StringTie exon       | 100203977 | 100204085 | . | - | . | transcript_MSTRG.33274.1(gene_id | MSTRG.33274; |
| 6 StringTie transcript | 106635947 | 106650737 | . | - | . | transcript_MSTRG.33356.1(gene_id | MSTRG.33356; |
| 6 StringTie exon       | 106635947 | 106636344 | . | - | . | transcript_MSTRG.33356.1(gene_id | MSTRG.33356; |
| 6 StringTie exon       | 106650661 | 106650737 | . | - | . | transcript_MSTRG.33356.1(gene_id | MSTRG.33356; |
| 6 StringTie transcript | 115834057 | 115857831 | . | - | . | transcript_MSTRG.33479.1(gene_id | MSTRG.33479; |
| 6 StringTie exon       | 115834057 | 115834283 | . | - | . | transcript_MSTRG.33479.1(gene_id | MSTRG.33479; |
| 6 StringTie exon       | 115834768 | 115834824 | . | - | . | transcript_MSTRG.33479.1(gene_id | MSTRG.33479; |
| 6 StringTie exon       | 115834969 | 115835074 | . | - | . | transcript_MSTRG.33479.1(gene_id | MSTRG.33479; |
| 6 StringTie exon       | 115838276 | 115838498 | . | - | . | transcript_MSTRG.33479.1(gene_id | MSTRG.33479; |
| 6 StringTie exon       | 115857749 | 115857831 | . | - | . | transcript_MSTRG.33479.1(gene_id | MSTRG.33479; |
| 6 StringTie transcript | 142163295 | 142371113 | . | - | . | transcript_MSTRG.33691.1(gene_id | MSTRG.33691; |
| 6 StringTie exon       | 142163295 | 142163468 | . | - | . | transcript_MSTRG.33691.1(gene_id | MSTRG.33691; |

|                        |           |           |   |   |   |                                 |              |
|------------------------|-----------|-----------|---|---|---|---------------------------------|--------------|
| 6 StringTie exon       | 142271334 | 142271425 | . | - | . | transcript_MSTRG.33691.lgene_id | MSTRG.33691; |
| 6 StringTie exon       | 142371079 | 142371113 | . | - | . | transcript_MSTRG.33691.lgene_id | MSTRG.33691; |
| 6 StringTie transcript | 146101209 | 146142373 | . | - | . | transcript_MSTRG.33772.lgene_id | MSTRG.33772; |
| 6 StringTie exon       | 146101209 | 146101223 | . | - | . | transcript_MSTRG.33772.lgene_id | MSTRG.33772; |
| 6 StringTie exon       | 146142135 | 146142373 | . | - | . | transcript_MSTRG.33772.lgene_id | MSTRG.33772; |
| 6 StringTie transcript | 156608053 | 156611358 | . | - | . | transcript_MSTRG.33951.lgene_id | MSTRG.33951; |
| 6 StringTie exon       | 156608053 | 156608633 | . | - | . | transcript_MSTRG.33951.lgene_id | MSTRG.33951; |
| 6 StringTie exon       | 156611258 | 156611358 | . | - | . | transcript_MSTRG.33951.lgene_id | MSTRG.33951; |
| 6 StringTie transcript | 156983173 | 157197843 | . | - | . | transcript_MSTRG.33969.lgene_id | MSTRG.33969; |
| 6 StringTie exon       | 156983173 | 156983218 | . | - | . | transcript_MSTRG.33969.lgene_id | MSTRG.33969; |
| 6 StringTie exon       | 157101587 | 157101639 | . | - | . | transcript_MSTRG.33969.lgene_id | MSTRG.33969; |
| 6 StringTie exon       | 157108634 | 157108736 | . | - | . | transcript_MSTRG.33969.lgene_id | MSTRG.33969; |
| 6 StringTie exon       | 157197784 | 157197843 | . | - | . | transcript_MSTRG.33969.lgene_id | MSTRG.33969; |
| 6 StringTie transcript | 165197130 | 165201719 | . | - | . | transcript_MSTRG.34095.lgene_id | MSTRG.34095; |
| 6 StringTie exon       | 165197130 | 165197493 | . | - | . | transcript_MSTRG.34095.lgene_id | MSTRG.34095; |
| 6 StringTie exon       | 165200905 | 165201719 | . | - | . | transcript_MSTRG.34095.lgene_id | MSTRG.34095; |
| 6 StringTie transcript | 169216241 | 169221297 | . | - | . | transcript_MSTRG.34205.lgene_id | MSTRG.34205; |
| 6 StringTie exon       | 169216241 | 169216681 | . | - | . | transcript_MSTRG.34205.lgene_id | MSTRG.34205; |
| 6 StringTie exon       | 169220489 | 169221297 | . | - | . | transcript_MSTRG.34205.lgene_id | MSTRG.34205; |
| 7 StringTie transcript | 951585    | 984061    | . | + | . | transcript_MSTRG.34259.lgene_id | MSTRG.34259; |
| 7 StringTie exon       | 951585    | 951617    | . | + | . | transcript_MSTRG.34259.lgene_id | MSTRG.34259; |
| 7 StringTie exon       | 952110    | 953440    | . | + | . | transcript_MSTRG.34259.lgene_id | MSTRG.34259; |
| 7 StringTie exon       | 981411    | 984061    | . | + | . | transcript_MSTRG.34259.lgene_id | MSTRG.34259; |
| 7 StringTie transcript | 1344223   | 1347684   | . | + | . | transcript_MSTRG.34252.lgene_id | MSTRG.34252; |
| 7 StringTie exon       | 1344223   | 1344435   | . | + | . | transcript_MSTRG.34252.lgene_id | MSTRG.34252; |
| 7 StringTie exon       | 1345121   | 1347684   | . | + | . | transcript_MSTRG.34252.lgene_id | MSTRG.34252; |
| 7 StringTie transcript | 1431327   | 1432314   | . | + | . | transcript_MSTRG.34263.lgene_id | MSTRG.34263; |
| 7 StringTie exon       | 1431327   | 1431552   | . | + | . | transcript_MSTRG.34263.lgene_id | MSTRG.34263; |
| 7 StringTie exon       | 1432261   | 1432314   | . | + | . | transcript_MSTRG.34263.lgene_id | MSTRG.34263; |
| 7 StringTie transcript | 2469276   | 2481600   | . | + | . | transcript_MSTRG.34281.lgene_id | MSTRG.34281; |
| 7 StringTie exon       | 2469276   | 2469361   | . | + | . | transcript_MSTRG.34281.lgene_id | MSTRG.34281; |
| 7 StringTie exon       | 2480912   | 2481600   | . | + | . | transcript_MSTRG.34281.lgene_id | MSTRG.34281; |
| 7 StringTie transcript | 5853741   | 5868768   | . | + | . | transcript_MSTRG.34330.lgene_id | MSTRG.34330; |
| 7 StringTie exon       | 5853741   | 5853975   | . | + | . | transcript_MSTRG.34330.lgene_id | MSTRG.34330; |
| 7 StringTie exon       | 5868745   | 5868768   | . | + | . | transcript_MSTRG.34330.lgene_id | MSTRG.34330; |

|                       |          |          |   |   |   |                                 |              |
|-----------------------|----------|----------|---|---|---|---------------------------------|--------------|
| 7 StringTie transcrip | 5877361  | 5882073  | . | + | . | transcript_MSTRG.34335.lgene_id | MSTRG.34335; |
| 7 StringTie exon      | 5877361  | 5877977  | . | + | . | transcript_MSTRG.34335.lgene_id | MSTRG.34335; |
| 7 StringTie exon      | 5882017  | 5882073  | . | + | . | transcript_MSTRG.34335.lgene_id | MSTRG.34335; |
| 7 StringTie transcrip | 10925109 | 10930946 | . | + | . | transcript_MSTRG.34426.lgene_id | MSTRG.34426; |
| 7 StringTie exon      | 10925109 | 10925293 | . | + | . | transcript_MSTRG.34426.lgene_id | MSTRG.34426; |
| 7 StringTie exon      | 10927381 | 10930946 | . | + | . | transcript_MSTRG.34426.lgene_id | MSTRG.34426; |
| 7 StringTie transcrip | 11245041 | 11250429 | . | + | . | transcript_MSTRG.34428.lgene_id | MSTRG.34428; |
| 7 StringTie exon      | 11245041 | 11245103 | . | + | . | transcript_MSTRG.34428.lgene_id | MSTRG.34428; |
| 7 StringTie exon      | 11249283 | 11249397 | . | + | . | transcript_MSTRG.34428.lgene_id | MSTRG.34428; |
| 7 StringTie exon      | 11250094 | 11250429 | . | + | . | transcript_MSTRG.34428.lgene_id | MSTRG.34428; |
| 7 StringTie transcrip | 12733109 | 12757663 | . | + | . | transcript_MSTRG.34455.lgene_id | MSTRG.34455; |
| 7 StringTie exon      | 12733109 | 12733153 | . | + | . | transcript_MSTRG.34455.lgene_id | MSTRG.34455; |
| 7 StringTie exon      | 12733664 | 12733978 | . | + | . | transcript_MSTRG.34455.lgene_id | MSTRG.34455; |
| 7 StringTie exon      | 12743552 | 12743662 | . | + | . | transcript_MSTRG.34455.lgene_id | MSTRG.34455; |
| 7 StringTie exon      | 12743786 | 12743867 | . | + | . | transcript_MSTRG.34455.lgene_id | MSTRG.34455; |
| 7 StringTie exon      | 12746055 | 12746189 | . | + | . | transcript_MSTRG.34455.lgene_id | MSTRG.34455; |
| 7 StringTie exon      | 12757311 | 12757471 | . | + | . | transcript_MSTRG.34455.lgene_id | MSTRG.34455; |
| 7 StringTie exon      | 12757641 | 12757663 | . | + | . | transcript_MSTRG.34455.lgene_id | MSTRG.34455; |
| 7 StringTie transcrip | 12733858 | 12735290 | . | + | . | transcript_MSTRG.34455.lgene_id | MSTRG.34455; |
| 7 StringTie exon      | 12733858 | 12733978 | . | + | . | transcript_MSTRG.34455.lgene_id | MSTRG.34455; |
| 7 StringTie exon      | 12734804 | 12735290 | . | + | . | transcript_MSTRG.34455.lgene_id | MSTRG.34455; |
| 7 StringTie transcrip | 13971357 | 13971699 | . | + | . | transcript_MSTRG.34499.lgene_id | MSTRG.34499; |
| 7 StringTie exon      | 13971357 | 13971395 | . | + | . | transcript_MSTRG.34499.lgene_id | MSTRG.34499; |
| 7 StringTie exon      | 13971487 | 13971699 | . | + | . | transcript_MSTRG.34499.lgene_id | MSTRG.34499; |
| 7 StringTie transcrip | 21559159 | 21562817 | . | + | . | transcript_MSTRG.34746.lgene_id | MSTRG.34746; |
| 7 StringTie exon      | 21559159 | 21559347 | . | + | . | transcript_MSTRG.34746.lgene_id | MSTRG.34746; |
| 7 StringTie exon      | 21561413 | 21561513 | . | + | . | transcript_MSTRG.34746.lgene_id | MSTRG.34746; |
| 7 StringTie exon      | 21562768 | 21562817 | . | + | . | transcript_MSTRG.34746.lgene_id | MSTRG.34746; |
| 7 StringTie transcrip | 23234183 | 23234977 | . | + | . | transcript_MSTRG.34812.lgene_id | MSTRG.34812; |
| 7 StringTie exon      | 23234183 | 23234289 | . | + | . | transcript_MSTRG.34812.lgene_id | MSTRG.34812; |
| 7 StringTie exon      | 23234872 | 23234977 | . | + | . | transcript_MSTRG.34812.lgene_id | MSTRG.34812; |
| 7 StringTie transcrip | 24097492 | 24098545 | . | + | . | transcript_MSTRG.34932.lgene_id | MSTRG.34932; |
| 7 StringTie exon      | 24097492 | 24097534 | . | + | . | transcript_MSTRG.34932.lgene_id | MSTRG.34932; |
| 7 StringTie exon      | 24098287 | 24098545 | . | + | . | transcript_MSTRG.34932.lgene_id | MSTRG.34932; |
| 7 StringTie transcrip | 24101949 | 24102935 | . | + | . | transcript_MSTRG.34933.lgene_id | MSTRG.34933; |

|                        |          |          |   |   |   |                                 |              |
|------------------------|----------|----------|---|---|---|---------------------------------|--------------|
| 7 StringTie exon       | 24101949 | 24101990 | . | + | . | transcript_MSTRG.34933.lgene_id | MSTRG.34933; |
| 7 StringTie exon       | 24102014 | 24102072 | . | + | . | transcript_MSTRG.34933.lgene_id | MSTRG.34933; |
| 7 StringTie exon       | 24102826 | 24102935 | . | + | . | transcript_MSTRG.34933.lgene_id | MSTRG.34933; |
| 7 StringTie transcript | 24888270 | 24907578 | . | + | . | transcript_MSTRG.34916.lgene_id | MSTRG.34916; |
| 7 StringTie exon       | 24888270 | 24888293 | . | + | . | transcript_MSTRG.34916.lgene_id | MSTRG.34916; |
| 7 StringTie exon       | 24907307 | 24907578 | . | + | . | transcript_MSTRG.34916.lgene_id | MSTRG.34916; |
| 7 StringTie transcript | 26461728 | 26477596 | . | + | . | transcript_MSTRG.34959.lgene_id | MSTRG.34959; |
| 7 StringTie exon       | 26461728 | 26462166 | . | + | . | transcript_MSTRG.34959.lgene_id | MSTRG.34959; |
| 7 StringTie exon       | 26477116 | 26477596 | . | + | . | transcript_MSTRG.34959.lgene_id | MSTRG.34959; |
| 7 StringTie transcript | 26600994 | 26601450 | . | + | . | transcript_MSTRG.34971.lgene_id | MSTRG.34971; |
| 7 StringTie exon       | 26600994 | 26601257 | . | + | . | transcript_MSTRG.34971.lgene_id | MSTRG.34971; |
| 7 StringTie exon       | 26601292 | 26601450 | . | + | . | transcript_MSTRG.34971.lgene_id | MSTRG.34971; |
| 7 StringTie transcript | 30666965 | 30668334 | . | + | . | transcript_MSTRG.35020.lgene_id | MSTRG.35020; |
| 7 StringTie exon       | 30666965 | 30667075 | . | + | . | transcript_MSTRG.35020.lgene_id | MSTRG.35020; |
| 7 StringTie exon       | 30667442 | 30668334 | . | + | . | transcript_MSTRG.35020.lgene_id | MSTRG.35020; |
| 7 StringTie transcript | 31353928 | 31357305 | . | + | . | transcript_MSTRG.35051.lgene_id | MSTRG.35051; |
| 7 StringTie exon       | 31353928 | 31354093 | . | + | . | transcript_MSTRG.35051.lgene_id | MSTRG.35051; |
| 7 StringTie exon       | 31357058 | 31357305 | . | + | . | transcript_MSTRG.35051.lgene_id | MSTRG.35051; |
| 7 StringTie transcript | 32738838 | 32756093 | . | + | . | transcript_MSTRG.35093.lgene_id | MSTRG.35093; |
| 7 StringTie exon       | 32738838 | 32739028 | . | + | . | transcript_MSTRG.35093.lgene_id | MSTRG.35093; |
| 7 StringTie exon       | 32748002 | 32748103 | . | + | . | transcript_MSTRG.35093.lgene_id | MSTRG.35093; |
| 7 StringTie exon       | 32750281 | 32750388 | . | + | . | transcript_MSTRG.35093.lgene_id | MSTRG.35093; |
| 7 StringTie exon       | 32752277 | 32752399 | . | + | . | transcript_MSTRG.35093.lgene_id | MSTRG.35093; |
| 7 StringTie exon       | 32755102 | 32756093 | . | + | . | transcript_MSTRG.35093.lgene_id | MSTRG.35093; |
| 7 StringTie transcript | 32738852 | 32756539 | . | + | . | transcript_MSTRG.35093.lgene_id | MSTRG.35093; |
| 7 StringTie exon       | 32738852 | 32739028 | . | + | . | transcript_MSTRG.35093.lgene_id | MSTRG.35093; |
| 7 StringTie exon       | 32750281 | 32750388 | . | + | . | transcript_MSTRG.35093.lgene_id | MSTRG.35093; |
| 7 StringTie exon       | 32752277 | 32752399 | . | + | . | transcript_MSTRG.35093.lgene_id | MSTRG.35093; |
| 7 StringTie exon       | 32755102 | 32756539 | . | + | . | transcript_MSTRG.35093.lgene_id | MSTRG.35093; |
| 7 StringTie transcript | 34123306 | 34134001 | . | + | . | transcript_MSTRG.35117.lgene_id | MSTRG.35117; |
| 7 StringTie exon       | 34123306 | 34123476 | . | + | . | transcript_MSTRG.35117.lgene_id | MSTRG.35117; |
| 7 StringTie exon       | 34125200 | 34125310 | . | + | . | transcript_MSTRG.35117.lgene_id | MSTRG.35117; |
| 7 StringTie exon       | 34126262 | 34126336 | . | + | . | transcript_MSTRG.35117.lgene_id | MSTRG.35117; |
| 7 StringTie exon       | 34129058 | 34129198 | . | + | . | transcript_MSTRG.35117.lgene_id | MSTRG.35117; |
| 7 StringTie exon       | 34130521 | 34134001 | . | + | . | transcript_MSTRG.35117.lgene_id | MSTRG.35117; |

|                        |          |          |   |   |   |                                 |              |
|------------------------|----------|----------|---|---|---|---------------------------------|--------------|
| 7 StringTie transcript | 34123384 | 34130768 | . | + | . | transcript_MSTRG.35117.¿gene_id | MSTRG.35117; |
| 7 StringTie exon       | 34123384 | 34123476 | . | + | . | transcript_MSTRG.35117.¿gene_id | MSTRG.35117; |
| 7 StringTie exon       | 34125200 | 34125310 | . | + | . | transcript_MSTRG.35117.¿gene_id | MSTRG.35117; |
| 7 StringTie exon       | 34126262 | 34126336 | . | + | . | transcript_MSTRG.35117.¿gene_id | MSTRG.35117; |
| 7 StringTie exon       | 34129058 | 34129198 | . | + | . | transcript_MSTRG.35117.¿gene_id | MSTRG.35117; |
| 7 StringTie exon       | 34130517 | 34130768 | . | + | . | transcript_MSTRG.35117.¿gene_id | MSTRG.35117; |
| 7 StringTie transcript | 34555354 | 34596028 | . | + | . | transcript_MSTRG.35111.¿gene_id | MSTRG.35111; |
| 7 StringTie exon       | 34555354 | 34555398 | . | + | . | transcript_MSTRG.35111.¿gene_id | MSTRG.35111; |
| 7 StringTie exon       | 34575271 | 34575436 | . | + | . | transcript_MSTRG.35111.¿gene_id | MSTRG.35111; |
| 7 StringTie exon       | 34595626 | 34596028 | . | + | . | transcript_MSTRG.35111.¿gene_id | MSTRG.35111; |
| 7 StringTie transcript | 34709396 | 34721387 | . | + | . | transcript_MSTRG.35125.¿gene_id | MSTRG.35125; |
| 7 StringTie exon       | 34709396 | 34710732 | . | + | . | transcript_MSTRG.35125.¿gene_id | MSTRG.35125; |
| 7 StringTie exon       | 34720729 | 34721387 | . | + | . | transcript_MSTRG.35125.¿gene_id | MSTRG.35125; |
| 7 StringTie transcript | 34710239 | 34714909 | . | + | . | transcript_MSTRG.35125.¿gene_id | MSTRG.35125; |
| 7 StringTie exon       | 34710239 | 34710732 | . | + | . | transcript_MSTRG.35125.¿gene_id | MSTRG.35125; |
| 7 StringTie exon       | 34714282 | 34714909 | . | + | . | transcript_MSTRG.35125.¿gene_id | MSTRG.35125; |
| 7 StringTie transcript | 37884230 | 37886935 | . | + | . | transcript_MSTRG.35208.¿gene_id | MSTRG.35208; |
| 7 StringTie exon       | 37884230 | 37885407 | . | + | . | transcript_MSTRG.35208.¿gene_id | MSTRG.35208; |
| 7 StringTie exon       | 37885430 | 37886935 | . | + | . | transcript_MSTRG.35208.¿gene_id | MSTRG.35208; |
| 7 StringTie transcript | 37887270 | 37891460 | . | + | . | transcript_MSTRG.35209.¿gene_id | MSTRG.35209; |
| 7 StringTie exon       | 37887270 | 37887607 | . | + | . | transcript_MSTRG.35209.¿gene_id | MSTRG.35209; |
| 7 StringTie exon       | 37891367 | 37891460 | . | + | . | transcript_MSTRG.35209.¿gene_id | MSTRG.35209; |
| 7 StringTie transcript | 38739175 | 38740329 | . | + | . | transcript_MSTRG.35229.¿gene_id | MSTRG.35229; |
| 7 StringTie exon       | 38739175 | 38739375 | . | + | . | transcript_MSTRG.35229.¿gene_id | MSTRG.35229; |
| 7 StringTie exon       | 38739998 | 38740329 | . | + | . | transcript_MSTRG.35229.¿gene_id | MSTRG.35229; |
| 7 StringTie transcript | 45967095 | 45976289 | . | + | . | transcript_MSTRG.35326.¿gene_id | MSTRG.35326; |
| 7 StringTie exon       | 45967095 | 45967928 | . | + | . | transcript_MSTRG.35326.¿gene_id | MSTRG.35326; |
| 7 StringTie exon       | 45974123 | 45976289 | . | + | . | transcript_MSTRG.35326.¿gene_id | MSTRG.35326; |
| 7 StringTie transcript | 52202996 | 52206437 | . | + | . | transcript_MSTRG.35465.¿gene_id | MSTRG.35465; |
| 7 StringTie exon       | 52202996 | 52203203 | . | + | . | transcript_MSTRG.35465.¿gene_id | MSTRG.35465; |
| 7 StringTie exon       | 52203308 | 52203368 | . | + | . | transcript_MSTRG.35465.¿gene_id | MSTRG.35465; |
| 7 StringTie exon       | 52206298 | 52206437 | . | + | . | transcript_MSTRG.35465.¿gene_id | MSTRG.35465; |
| 7 StringTie transcript | 53859216 | 53861370 | . | + | . | transcript_MSTRG.35531.¿gene_id | MSTRG.35531; |
| 7 StringTie exon       | 53859216 | 53859278 | . | + | . | transcript_MSTRG.35531.¿gene_id | MSTRG.35531; |
| 7 StringTie exon       | 53861190 | 53861370 | . | + | . | transcript_MSTRG.35531.¿gene_id | MSTRG.35531; |



|                       |          |            |   |   |                                 |              |
|-----------------------|----------|------------|---|---|---------------------------------|--------------|
| 7 StringTie transcrip | 56378612 | 56381253 . | + | . | transcript_MSTRG.35628.¿gene_id | MSTRG.35628; |
| 7 StringTie exon      | 56378612 | 56378667 . | + | . | transcript_MSTRG.35628.¿gene_id | MSTRG.35628; |
| 7 StringTie exon      | 56380920 | 56381253 . | + | . | transcript_MSTRG.35628.¿gene_id | MSTRG.35628; |
| 7 StringTie transcrip | 58268997 | 58278781 . | + | . | transcript_MSTRG.35670.¿gene_id | MSTRG.35670; |
| 7 StringTie exon      | 58268997 | 58269103 . | + | . | transcript_MSTRG.35670.¿gene_id | MSTRG.35670; |
| 7 StringTie exon      | 58269747 | 58269869 . | + | . | transcript_MSTRG.35670.¿gene_id | MSTRG.35670; |
| 7 StringTie exon      | 58278351 | 58278575 . | + | . | transcript_MSTRG.35670.¿gene_id | MSTRG.35670; |
| 7 StringTie exon      | 58278707 | 58278781 . | + | . | transcript_MSTRG.35670.¿gene_id | MSTRG.35670; |
| 7 StringTie transcrip | 58269007 | 58278817 . | + | . | transcript_MSTRG.35670.¿gene_id | MSTRG.35670; |
| 7 StringTie exon      | 58269007 | 58269103 . | + | . | transcript_MSTRG.35670.¿gene_id | MSTRG.35670; |
| 7 StringTie exon      | 58269747 | 58269869 . | + | . | transcript_MSTRG.35670.¿gene_id | MSTRG.35670; |
| 7 StringTie exon      | 58278351 | 58278562 . | + | . | transcript_MSTRG.35670.¿gene_id | MSTRG.35670; |
| 7 StringTie exon      | 58278707 | 58278817 . | + | . | transcript_MSTRG.35670.¿gene_id | MSTRG.35670; |
| 7 StringTie transcrip | 58279025 | 58279649 . | + | . | transcript_MSTRG.35672.¿gene_id | MSTRG.35672; |
| 7 StringTie exon      | 58279025 | 58279070 . | + | . | transcript_MSTRG.35672.¿gene_id | MSTRG.35672; |
| 7 StringTie exon      | 58279386 | 58279649 . | + | . | transcript_MSTRG.35672.¿gene_id | MSTRG.35672; |
| 7 StringTie transcrip | 59643260 | 59644955 . | + | . | transcript_MSTRG.35710.¿gene_id | MSTRG.35710; |
| 7 StringTie exon      | 59643260 | 59643678 . | + | . | transcript_MSTRG.35710.¿gene_id | MSTRG.35710; |
| 7 StringTie exon      | 59644698 | 59644955 . | + | . | transcript_MSTRG.35710.¿gene_id | MSTRG.35710; |
| 7 StringTie transcrip | 68726185 | 68747586 . | + | . | transcript_MSTRG.35868.¿gene_id | MSTRG.35868; |
| 7 StringTie exon      | 68726185 | 68726624 . | + | . | transcript_MSTRG.35868.¿gene_id | MSTRG.35868; |
| 7 StringTie exon      | 68746997 | 68747586 . | + | . | transcript_MSTRG.35868.¿gene_id | MSTRG.35868; |
| 7 StringTie transcrip | 73163587 | 73727616 . | + | . | transcript_MSTRG.35902.¿gene_id | MSTRG.35902; |
| 7 StringTie exon      | 73163587 | 73163844 . | + | . | transcript_MSTRG.35902.¿gene_id | MSTRG.35902; |
| 7 StringTie exon      | 73540139 | 73540264 . | + | . | transcript_MSTRG.35902.¿gene_id | MSTRG.35902; |
| 7 StringTie exon      | 73724595 | 73724689 . | + | . | transcript_MSTRG.35902.¿gene_id | MSTRG.35902; |
| 7 StringTie exon      | 73727551 | 73727616 . | + | . | transcript_MSTRG.35902.¿gene_id | MSTRG.35902; |
| 7 StringTie transcrip | 73727770 | 73729049 . | + | . | transcript_MSTRG.35905.¿gene_id | MSTRG.35905; |
| 7 StringTie exon      | 73727770 | 73727988 . | + | . | transcript_MSTRG.35905.¿gene_id | MSTRG.35905; |
| 7 StringTie exon      | 73728985 | 73729049 . | + | . | transcript_MSTRG.35905.¿gene_id | MSTRG.35905; |
| 7 StringTie transcrip | 80413482 | 80417358 . | + | . | transcript_MSTRG.36127.¿gene_id | MSTRG.36127; |
| 7 StringTie exon      | 80413482 | 80413801 . | + | . | transcript_MSTRG.36127.¿gene_id | MSTRG.36127; |
| 7 StringTie exon      | 80415099 | 80417358 . | + | . | transcript_MSTRG.36127.¿gene_id | MSTRG.36127; |
| 7 StringTie transcrip | 83126875 | 83128864 . | + | . | transcript_MSTRG.36124.¿gene_id | MSTRG.36124; |
| 7 StringTie exon      | 83126875 | 83128406 . | + | . | transcript_MSTRG.36124.¿gene_id | MSTRG.36124; |

|                       |           |           |   |   |   |                                 |              |
|-----------------------|-----------|-----------|---|---|---|---------------------------------|--------------|
| 7 StringTie exon      | 83128774  | 83128864  | . | + | . | transcript_MSTRG.36124.lgene_id | MSTRG.36124; |
| 7 StringTie transcrip | 83550072  | 83570760  | . | + | . | transcript_MSTRG.36149.lgene_id | MSTRG.36149; |
| 7 StringTie exon      | 83550072  | 83550147  | . | + | . | transcript_MSTRG.36149.lgene_id | MSTRG.36149; |
| 7 StringTie exon      | 83569279  | 83570760  | . | + | . | transcript_MSTRG.36149.lgene_id | MSTRG.36149; |
| 7 StringTie transcrip | 86924134  | 86925569  | . | + | . | transcript_MSTRG.36205.lgene_id | MSTRG.36205; |
| 7 StringTie exon      | 86924134  | 86924299  | . | + | . | transcript_MSTRG.36205.lgene_id | MSTRG.36205; |
| 7 StringTie exon      | 86925256  | 86925569  | . | + | . | transcript_MSTRG.36205.lgene_id | MSTRG.36205; |
| 7 StringTie transcrip | 91097333  | 91097632  | . | + | . | transcript_MSTRG.36254.lgene_id | MSTRG.36254; |
| 7 StringTie exon      | 91097333  | 91097545  | . | + | . | transcript_MSTRG.36254.lgene_id | MSTRG.36254; |
| 7 StringTie exon      | 91097577  | 91097632  | . | + | . | transcript_MSTRG.36254.lgene_id | MSTRG.36254; |
| 7 StringTie transcrip | 103320056 | 103341576 | . | + | . | transcript_MSTRG.36567.lgene_id | MSTRG.36567; |
| 7 StringTie exon      | 103320056 | 103320289 | . | + | . | transcript_MSTRG.36567.lgene_id | MSTRG.36567; |
| 7 StringTie exon      | 103325974 | 103326167 | . | + | . | transcript_MSTRG.36567.lgene_id | MSTRG.36567; |
| 7 StringTie exon      | 103329494 | 103329661 | . | + | . | transcript_MSTRG.36567.lgene_id | MSTRG.36567; |
| 7 StringTie exon      | 103341353 | 103341576 | . | + | . | transcript_MSTRG.36567.lgene_id | MSTRG.36567; |
| 7 StringTie transcrip | 103320056 | 103341685 | . | + | . | transcript_MSTRG.36567.lgene_id | MSTRG.36567; |
| 7 StringTie exon      | 103320056 | 103320289 | . | + | . | transcript_MSTRG.36567.lgene_id | MSTRG.36567; |
| 7 StringTie exon      | 103329494 | 103329661 | . | + | . | transcript_MSTRG.36567.lgene_id | MSTRG.36567; |
| 7 StringTie exon      | 103341353 | 103341685 | . | + | . | transcript_MSTRG.36567.lgene_id | MSTRG.36567; |
| 7 StringTie transcrip | 103320072 | 103341579 | . | + | . | transcript_MSTRG.36567.lgene_id | MSTRG.36567; |
| 7 StringTie exon      | 103320072 | 103320289 | . | + | . | transcript_MSTRG.36567.lgene_id | MSTRG.36567; |
| 7 StringTie exon      | 103329494 | 103329661 | . | + | . | transcript_MSTRG.36567.lgene_id | MSTRG.36567; |
| 7 StringTie exon      | 103329832 | 103329969 | . | + | . | transcript_MSTRG.36567.lgene_id | MSTRG.36567; |
| 7 StringTie exon      | 103331407 | 103331482 | . | + | . | transcript_MSTRG.36567.lgene_id | MSTRG.36567; |
| 7 StringTie exon      | 103341353 | 103341579 | . | + | . | transcript_MSTRG.36567.lgene_id | MSTRG.36567; |
| 7 StringTie transcrip | 103320088 | 103326554 | . | + | . | transcript_MSTRG.36567.lgene_id | MSTRG.36567; |
| 7 StringTie exon      | 103320088 | 103320266 | . | + | . | transcript_MSTRG.36567.lgene_id | MSTRG.36567; |
| 7 StringTie exon      | 103325974 | 103326554 | . | + | . | transcript_MSTRG.36567.lgene_id | MSTRG.36567; |
| 7 StringTie transcrip | 103320228 | 103341637 | . | + | . | transcript_MSTRG.36567.lgene_id | MSTRG.36567; |
| 7 StringTie exon      | 103320228 | 103320289 | . | + | . | transcript_MSTRG.36567.lgene_id | MSTRG.36567; |
| 7 StringTie exon      | 103329494 | 103329661 | . | + | . | transcript_MSTRG.36567.lgene_id | MSTRG.36567; |
| 7 StringTie exon      | 103331407 | 103331482 | . | + | . | transcript_MSTRG.36567.lgene_id | MSTRG.36567; |
| 7 StringTie exon      | 103341353 | 103341637 | . | + | . | transcript_MSTRG.36567.lgene_id | MSTRG.36567; |
| 7 StringTie transcrip | 104009369 | 104012312 | . | + | . | transcript_MSTRG.36585.lgene_id | MSTRG.36585; |
| 7 StringTie exon      | 104009369 | 104009596 | . | + | . | transcript_MSTRG.36585.lgene_id | MSTRG.36585; |

|                       |           |           |   |   |   |                                 |              |
|-----------------------|-----------|-----------|---|---|---|---------------------------------|--------------|
| 7 StringTie exon      | 104010410 | 104012312 | . | + | . | transcript_MSTRG.36585.¿gene_id | MSTRG.36585; |
| 7 StringTie transcrip | 104009369 | 104012590 | . | + | . | transcript_MSTRG.36585.lgene_id | MSTRG.36585; |
| 7 StringTie exon      | 104009369 | 104009801 | . | + | . | transcript_MSTRG.36585.lgene_id | MSTRG.36585; |
| 7 StringTie exon      | 104010410 | 104012590 | . | + | . | transcript_MSTRG.36585.lgene_id | MSTRG.36585; |
| 7 StringTie transcrip | 104023341 | 104041684 | . | + | . | transcript_MSTRG.36590.lgene_id | MSTRG.36590; |
| 7 StringTie exon      | 104023341 | 104023962 | . | + | . | transcript_MSTRG.36590.lgene_id | MSTRG.36590; |
| 7 StringTie exon      | 104026400 | 104026585 | . | + | . | transcript_MSTRG.36590.lgene_id | MSTRG.36590; |
| 7 StringTie exon      | 104041600 | 104041684 | . | + | . | transcript_MSTRG.36590.lgene_id | MSTRG.36590; |
| 7 StringTie transcrip | 104032103 | 104041672 | . | + | . | transcript_MSTRG.36590.¿gene_id | MSTRG.36590; |
| 7 StringTie exon      | 104032103 | 104039274 | . | + | . | transcript_MSTRG.36590.¿gene_id | MSTRG.36590; |
| 7 StringTie exon      | 104041600 | 104041672 | . | + | . | transcript_MSTRG.36590.¿gene_id | MSTRG.36590; |
| 7 StringTie transcrip | 111279260 | 111281765 | . | + | . | transcript_MSTRG.36622.lgene_id | MSTRG.36622; |
| 7 StringTie exon      | 111279260 | 111279284 | . | + | . | transcript_MSTRG.36622.lgene_id | MSTRG.36622; |
| 7 StringTie exon      | 111280079 | 111280264 | . | + | . | transcript_MSTRG.36622.lgene_id | MSTRG.36622; |
| 7 StringTie exon      | 111281372 | 111281557 | . | + | . | transcript_MSTRG.36622.lgene_id | MSTRG.36622; |
| 7 StringTie exon      | 111281674 | 111281765 | . | + | . | transcript_MSTRG.36622.lgene_id | MSTRG.36622; |
| 7 StringTie transcrip | 112935132 | 112936695 | . | + | . | transcript_MSTRG.36655.lgene_id | MSTRG.36655; |
| 7 StringTie exon      | 112935132 | 112935299 | . | + | . | transcript_MSTRG.36655.lgene_id | MSTRG.36655; |
| 7 StringTie exon      | 112936153 | 112936695 | . | + | . | transcript_MSTRG.36655.lgene_id | MSTRG.36655; |
| 7 StringTie transcrip | 113046444 | 113118367 | . | + | . | transcript_MSTRG.36661.lgene_id | MSTRG.36661; |
| 7 StringTie exon      | 113046444 | 113046658 | . | + | . | transcript_MSTRG.36661.lgene_id | MSTRG.36661; |
| 7 StringTie exon      | 113118298 | 113118367 | . | + | . | transcript_MSTRG.36661.lgene_id | MSTRG.36661; |
| 7 StringTie transcrip | 116436470 | 116439600 | . | + | . | transcript_MSTRG.36728.lgene_id | MSTRG.36728; |
| 7 StringTie exon      | 116436470 | 116437197 | . | + | . | transcript_MSTRG.36728.lgene_id | MSTRG.36728; |
| 7 StringTie exon      | 116438487 | 116439600 | . | + | . | transcript_MSTRG.36728.lgene_id | MSTRG.36728; |
| 7 StringTie transcrip | 116436535 | 116439371 | . | + | . | transcript_MSTRG.36728.¿gene_id | MSTRG.36728; |
| 7 StringTie exon      | 116436535 | 116437197 | . | + | . | transcript_MSTRG.36728.¿gene_id | MSTRG.36728; |
| 7 StringTie exon      | 116438487 | 116438583 | . | + | . | transcript_MSTRG.36728.¿gene_id | MSTRG.36728; |
| 7 StringTie exon      | 116438784 | 116439371 | . | + | . | transcript_MSTRG.36728.¿gene_id | MSTRG.36728; |
| 7 StringTie transcrip | 116574114 | 116581328 | . | + | . | transcript_MSTRG.36718.lgene_id | MSTRG.36718; |
| 7 StringTie exon      | 116574114 | 116574512 | . | + | . | transcript_MSTRG.36718.lgene_id | MSTRG.36718; |
| 7 StringTie exon      | 116581007 | 116581328 | . | + | . | transcript_MSTRG.36718.lgene_id | MSTRG.36718; |
| 7 StringTie transcrip | 121666129 | 121683783 | . | + | . | transcript_MSTRG.36773.¿gene_id | MSTRG.36773; |
| 7 StringTie exon      | 121666129 | 121666209 | . | + | . | transcript_MSTRG.36773.¿gene_id | MSTRG.36773; |
| 7 StringTie exon      | 121674888 | 121674962 | . | + | . | transcript_MSTRG.36773.¿gene_id | MSTRG.36773; |

|                       |           |           |   |   |   |                                 |              |
|-----------------------|-----------|-----------|---|---|---|---------------------------------|--------------|
| 7 StringTie exon      | 121683616 | 121683783 | . | + | . | transcript_MSTRG.36773.¿gene_id | MSTRG.36773; |
| 7 StringTie transcrip | 19618     | 42910     | . | - | . | transcript_MSTRG.34248.¿gene_id | MSTRG.34248; |
| 7 StringTie exon      | 19618     | 21492     | . | - | . | transcript_MSTRG.34248.¿gene_id | MSTRG.34248; |
| 7 StringTie exon      | 35216     | 35323     | . | - | . | transcript_MSTRG.34248.¿gene_id | MSTRG.34248; |
| 7 StringTie exon      | 39549     | 39796     | . | - | . | transcript_MSTRG.34248.¿gene_id | MSTRG.34248; |
| 7 StringTie exon      | 42806     | 42910     | . | - | . | transcript_MSTRG.34248.¿gene_id | MSTRG.34248; |
| 7 StringTie transcrip | 19622     | 42910     | . | - | . | transcript_MSTRG.34248.¿gene_id | MSTRG.34248; |
| 7 StringTie exon      | 19622     | 21492     | . | - | . | transcript_MSTRG.34248.¿gene_id | MSTRG.34248; |
| 7 StringTie exon      | 35216     | 35323     | . | - | . | transcript_MSTRG.34248.¿gene_id | MSTRG.34248; |
| 7 StringTie exon      | 42806     | 42910     | . | - | . | transcript_MSTRG.34248.¿gene_id | MSTRG.34248; |
| 7 StringTie transcrip | 19657     | 29139     | . | - | . | transcript_MSTRG.34248.¿gene_id | MSTRG.34248; |
| 7 StringTie exon      | 19657     | 21492     | . | - | . | transcript_MSTRG.34248.¿gene_id | MSTRG.34248; |
| 7 StringTie exon      | 28792     | 29139     | . | - | . | transcript_MSTRG.34248.¿gene_id | MSTRG.34248; |
| 7 StringTie transcrip | 19657     | 44825     | . | - | . | transcript_MSTRG.34248.¿gene_id | MSTRG.34248; |
| 7 StringTie exon      | 19657     | 21492     | . | - | . | transcript_MSTRG.34248.¿gene_id | MSTRG.34248; |
| 7 StringTie exon      | 35216     | 35323     | . | - | . | transcript_MSTRG.34248.¿gene_id | MSTRG.34248; |
| 7 StringTie exon      | 39549     | 39796     | . | - | . | transcript_MSTRG.34248.¿gene_id | MSTRG.34248; |
| 7 StringTie exon      | 44137     | 44825     | . | - | . | transcript_MSTRG.34248.¿gene_id | MSTRG.34248; |
| 7 StringTie transcrip | 20155     | 23848     | . | - | . | transcript_MSTRG.34248.¿gene_id | MSTRG.34248; |
| 7 StringTie exon      | 20155     | 21492     | . | - | . | transcript_MSTRG.34248.¿gene_id | MSTRG.34248; |
| 7 StringTie exon      | 23791     | 23848     | . | - | . | transcript_MSTRG.34248.¿gene_id | MSTRG.34248; |
| 7 StringTie transcrip | 1653270   | 1656262   | . | - | . | transcript_MSTRG.34265.¿gene_id | MSTRG.34265; |
| 7 StringTie exon      | 1653270   | 1654182   | . | - | . | transcript_MSTRG.34265.¿gene_id | MSTRG.34265; |
| 7 StringTie exon      | 1656016   | 1656262   | . | - | . | transcript_MSTRG.34265.¿gene_id | MSTRG.34265; |
| 7 StringTie transcrip | 2282920   | 2379157   | . | - | . | transcript_MSTRG.34285.¿gene_id | MSTRG.34285; |
| 7 StringTie exon      | 2282920   | 2283002   | . | - | . | transcript_MSTRG.34285.¿gene_id | MSTRG.34285; |
| 7 StringTie exon      | 2368145   | 2368264   | . | - | . | transcript_MSTRG.34285.¿gene_id | MSTRG.34285; |
| 7 StringTie exon      | 2378968   | 2379157   | . | - | . | transcript_MSTRG.34285.¿gene_id | MSTRG.34285; |
| 7 StringTie transcrip | 2354358   | 2379002   | . | - | . | transcript_MSTRG.34285.¿gene_id | MSTRG.34285; |
| 7 StringTie exon      | 2354358   | 2354635   | . | - | . | transcript_MSTRG.34285.¿gene_id | MSTRG.34285; |
| 7 StringTie exon      | 2368145   | 2368264   | . | - | . | transcript_MSTRG.34285.¿gene_id | MSTRG.34285; |
| 7 StringTie exon      | 2378968   | 2379002   | . | - | . | transcript_MSTRG.34285.¿gene_id | MSTRG.34285; |
| 7 StringTie transcrip | 2373511   | 2379152   | . | - | . | transcript_MSTRG.34285.¿gene_id | MSTRG.34285; |
| 7 StringTie exon      | 2373511   | 2373676   | . | - | . | transcript_MSTRG.34285.¿gene_id | MSTRG.34285; |
| 7 StringTie exon      | 2378968   | 2379152   | . | - | . | transcript_MSTRG.34285.¿gene_id | MSTRG.34285; |

|                       |          |            |     |                                 |              |
|-----------------------|----------|------------|-----|---------------------------------|--------------|
| 7 StringTie transcrip | 11242089 | 11245658 . | - . | transcript_MSTRG.34427.lgene_id | MSTRG.34427; |
| 7 StringTie exon      | 11242089 | 11244290 . | - . | transcript_MSTRG.34427.lgene_id | MSTRG.34427; |
| 7 StringTie exon      | 11245146 | 11245658 . | - . | transcript_MSTRG.34427.lgene_id | MSTRG.34427; |
| 7 StringTie transcrip | 16727932 | 16729640 . | - . | transcript_MSTRG.34542.lgene_id | MSTRG.34542; |
| 7 StringTie exon      | 16727932 | 16728136 . | - . | transcript_MSTRG.34542.lgene_id | MSTRG.34542; |
| 7 StringTie exon      | 16729581 | 16729640 . | - . | transcript_MSTRG.34542.lgene_id | MSTRG.34542; |
| 7 StringTie transcrip | 18235066 | 18453073 . | - . | transcript_MSTRG.34621.lgene_id | MSTRG.34621; |
| 7 StringTie exon      | 18235066 | 18235207 . | - . | transcript_MSTRG.34621.lgene_id | MSTRG.34621; |
| 7 StringTie exon      | 18312212 | 18312261 . | - . | transcript_MSTRG.34621.lgene_id | MSTRG.34621; |
| 7 StringTie exon      | 18313332 | 18313378 . | - . | transcript_MSTRG.34621.lgene_id | MSTRG.34621; |
| 7 StringTie exon      | 18369820 | 18369964 . | - . | transcript_MSTRG.34621.lgene_id | MSTRG.34621; |
| 7 StringTie exon      | 18372056 | 18372154 . | - . | transcript_MSTRG.34621.lgene_id | MSTRG.34621; |
| 7 StringTie exon      | 18452922 | 18453073 . | - . | transcript_MSTRG.34621.lgene_id | MSTRG.34621; |
| 7 StringTie transcrip | 19531443 | 19585725 . | - . | transcript_MSTRG.34644.lgene_id | MSTRG.34644; |
| 7 StringTie exon      | 19531443 | 19531660 . | - . | transcript_MSTRG.34644.lgene_id | MSTRG.34644; |
| 7 StringTie exon      | 19584879 | 19584920 . | - . | transcript_MSTRG.34644.lgene_id | MSTRG.34644; |
| 7 StringTie exon      | 19585003 | 19585725 . | - . | transcript_MSTRG.34644.lgene_id | MSTRG.34644; |
| 7 StringTie transcrip | 20000837 | 20005284 . | - . | transcript_MSTRG.34696.lgene_id | MSTRG.34696; |
| 7 StringTie exon      | 20000837 | 20002812 . | - . | transcript_MSTRG.34696.lgene_id | MSTRG.34696; |
| 7 StringTie exon      | 20005215 | 20005284 . | - . | transcript_MSTRG.34696.lgene_id | MSTRG.34696; |
| 7 StringTie transcrip | 20064389 | 20151820 . | - . | transcript_MSTRG.34696.lgene_id | MSTRG.34696; |
| 7 StringTie exon      | 20064389 | 20064436 . | - . | transcript_MSTRG.34696.lgene_id | MSTRG.34696; |
| 7 StringTie exon      | 20071851 | 20079087 . | - . | transcript_MSTRG.34696.lgene_id | MSTRG.34696; |
| 7 StringTie exon      | 20122371 | 20122506 . | - . | transcript_MSTRG.34696.lgene_id | MSTRG.34696; |
| 7 StringTie exon      | 20151713 | 20151820 . | - . | transcript_MSTRG.34696.lgene_id | MSTRG.34696; |
| 7 StringTie transcrip | 20779961 | 20783670 . | - . | transcript_MSTRG.34677.lgene_id | MSTRG.34677; |
| 7 StringTie exon      | 20779961 | 20780744 . | - . | transcript_MSTRG.34677.lgene_id | MSTRG.34677; |
| 7 StringTie exon      | 20783504 | 20783670 . | - . | transcript_MSTRG.34677.lgene_id | MSTRG.34677; |
| 7 StringTie transcrip | 21236160 | 21245446 . | - . | transcript_MSTRG.34711.lgene_id | MSTRG.34711; |
| 7 StringTie exon      | 21236160 | 21236483 . | - . | transcript_MSTRG.34711.lgene_id | MSTRG.34711; |
| 7 StringTie exon      | 21244638 | 21245446 . | - . | transcript_MSTRG.34711.lgene_id | MSTRG.34711; |
| 7 StringTie transcrip | 22825077 | 22957124 . | - . | transcript_MSTRG.34836.lgene_id | MSTRG.34836; |
| 7 StringTie exon      | 22825077 | 22825427 . | - . | transcript_MSTRG.34836.lgene_id | MSTRG.34836; |
| 7 StringTie exon      | 22957014 | 22957124 . | - . | transcript_MSTRG.34836.lgene_id | MSTRG.34836; |
| 7 StringTie transcrip | 22825077 | 22957170 . | - . | transcript_MSTRG.34836.lgene_id | MSTRG.34836; |

|                       |          |          |   |   |   |                                 |              |
|-----------------------|----------|----------|---|---|---|---------------------------------|--------------|
| 7 StringTie exon      | 22825077 | 22825427 | . | - | . | transcript_MSTRG.34836.¿gene_id | MSTRG.34836; |
| 7 StringTie exon      | 22889898 | 22889915 | . | - | . | transcript_MSTRG.34836.¿gene_id | MSTRG.34836; |
| 7 StringTie exon      | 22957032 | 22957170 | . | - | . | transcript_MSTRG.34836.¿gene_id | MSTRG.34836; |
| 7 StringTie transcrip | 22825309 | 22890013 | . | - | . | transcript_MSTRG.34836.¿gene_id | MSTRG.34836; |
| 7 StringTie exon      | 22825309 | 22825445 | . | - | . | transcript_MSTRG.34836.¿gene_id | MSTRG.34836; |
| 7 StringTie exon      | 22889916 | 22890013 | . | - | . | transcript_MSTRG.34836.¿gene_id | MSTRG.34836; |
| 7 StringTie transcrip | 22825309 | 22939429 | . | - | . | transcript_MSTRG.34836.¿gene_id | MSTRG.34836; |
| 7 StringTie exon      | 22825309 | 22825408 | . | - | . | transcript_MSTRG.34836.¿gene_id | MSTRG.34836; |
| 7 StringTie exon      | 22917936 | 22917972 | . | - | . | transcript_MSTRG.34836.¿gene_id | MSTRG.34836; |
| 7 StringTie exon      | 22939312 | 22939429 | . | - | . | transcript_MSTRG.34836.¿gene_id | MSTRG.34836; |
| 7 StringTie transcrip | 22825309 | 22957108 | . | - | . | transcript_MSTRG.34836.¿gene_id | MSTRG.34836; |
| 7 StringTie exon      | 22825309 | 22825445 | . | - | . | transcript_MSTRG.34836.¿gene_id | MSTRG.34836; |
| 7 StringTie exon      | 22957032 | 22957108 | . | - | . | transcript_MSTRG.34836.¿gene_id | MSTRG.34836; |
| 7 StringTie transcrip | 22825309 | 22957185 | . | - | . | transcript_MSTRG.34836.¿gene_id | MSTRG.34836; |
| 7 StringTie exon      | 22825309 | 22825408 | . | - | . | transcript_MSTRG.34836.¿gene_id | MSTRG.34836; |
| 7 StringTie exon      | 22917936 | 22917972 | . | - | . | transcript_MSTRG.34836.¿gene_id | MSTRG.34836; |
| 7 StringTie exon      | 22957032 | 22957185 | . | - | . | transcript_MSTRG.34836.¿gene_id | MSTRG.34836; |
| 7 StringTie transcrip | 22825309 | 22957185 | . | - | . | transcript_MSTRG.34836.¿gene_id | MSTRG.34836; |
| 7 StringTie exon      | 22825309 | 22825427 | . | - | . | transcript_MSTRG.34836.¿gene_id | MSTRG.34836; |
| 7 StringTie exon      | 22939294 | 22939401 | . | - | . | transcript_MSTRG.34836.¿gene_id | MSTRG.34836; |
| 7 StringTie exon      | 22957122 | 22957185 | . | - | . | transcript_MSTRG.34836.¿gene_id | MSTRG.34836; |
| 7 StringTie transcrip | 22826153 | 22919041 | . | - | . | transcript_MSTRG.34836.¿gene_id | MSTRG.34836; |
| 7 StringTie exon      | 22826153 | 22826266 | . | - | . | transcript_MSTRG.34836.¿gene_id | MSTRG.34836; |
| 7 StringTie exon      | 22890738 | 22890857 | . | - | . | transcript_MSTRG.34836.¿gene_id | MSTRG.34836; |
| 7 StringTie exon      | 22918918 | 22919041 | . | - | . | transcript_MSTRG.34836.¿gene_id | MSTRG.34836; |
| 7 StringTie transcrip | 22890483 | 22976567 | . | - | . | transcript_MSTRG.34836.¿gene_id | MSTRG.34836; |
| 7 StringTie exon      | 22890483 | 22890513 | . | - | . | transcript_MSTRG.34836.¿gene_id | MSTRG.34836; |
| 7 StringTie exon      | 22939916 | 22940106 | . | - | . | transcript_MSTRG.34836.¿gene_id | MSTRG.34836; |
| 7 StringTie exon      | 22957830 | 22957888 | . | - | . | transcript_MSTRG.34836.¿gene_id | MSTRG.34836; |
| 7 StringTie exon      | 22976457 | 22976567 | . | - | . | transcript_MSTRG.34836.¿gene_id | MSTRG.34836; |
| 7 StringTie transcrip | 22918712 | 22976567 | . | - | . | transcript_MSTRG.34836.¿gene_id | MSTRG.34836; |
| 7 StringTie exon      | 22918712 | 22918787 | . | - | . | transcript_MSTRG.34836.¿gene_id | MSTRG.34836; |
| 7 StringTie exon      | 22940107 | 22940165 | . | - | . | transcript_MSTRG.34836.¿gene_id | MSTRG.34836; |
| 7 StringTie exon      | 22976457 | 22976567 | . | - | . | transcript_MSTRG.34836.¿gene_id | MSTRG.34836; |
| 7 StringTie transcrip | 22826802 | 22941673 | . | - | . | transcript_MSTRG.34836.¿gene_id | MSTRG.34836; |

|                       |          |          |   |   |   |                                 |              |
|-----------------------|----------|----------|---|---|---|---------------------------------|--------------|
| 7 StringTie exon      | 22826802 | 22827728 | . | - | . | transcript_MSTRG.34836.lgene_id | MSTRG.34836; |
| 7 StringTie exon      | 22941563 | 22941673 | . | - | . | transcript_MSTRG.34836.lgene_id | MSTRG.34836; |
| 7 StringTie transcrip | 22826802 | 22959380 | . | - | . | transcript_MSTRG.34836.lgene_id | MSTRG.34836; |
| 7 StringTie exon      | 22826802 | 22827728 | . | - | . | transcript_MSTRG.34836.lgene_id | MSTRG.34836; |
| 7 StringTie exon      | 22959270 | 22959380 | . | - | . | transcript_MSTRG.34836.lgene_id | MSTRG.34836; |
| 7 StringTie transcrip | 22827542 | 22855176 | . | - | . | transcript_MSTRG.34836.lgene_id | MSTRG.34836; |
| 7 StringTie exon      | 22827542 | 22827728 | . | - | . | transcript_MSTRG.34836.lgene_id | MSTRG.34836; |
| 7 StringTie exon      | 22855125 | 22855176 | . | - | . | transcript_MSTRG.34836.lgene_id | MSTRG.34836; |
| 7 StringTie transcrip | 22827546 | 22892285 | . | - | . | transcript_MSTRG.34836.lgene_id | MSTRG.34836; |
| 7 StringTie exon      | 22827546 | 22827728 | . | - | . | transcript_MSTRG.34836.lgene_id | MSTRG.34836; |
| 7 StringTie exon      | 22892175 | 22892285 | . | - | . | transcript_MSTRG.34836.lgene_id | MSTRG.34836; |
| 7 StringTie transcrip | 22871227 | 22941673 | . | - | . | transcript_MSTRG.34836.lgene_id | MSTRG.34836; |
| 7 StringTie exon      | 22871227 | 22871326 | . | - | . | transcript_MSTRG.34836.lgene_id | MSTRG.34836; |
| 7 StringTie exon      | 22941563 | 22941673 | . | - | . | transcript_MSTRG.34836.lgene_id | MSTRG.34836; |
| 7 StringTie transcrip | 22941459 | 22959380 | . | - | . | transcript_MSTRG.34836.lgene_id | MSTRG.34836; |
| 7 StringTie exon      | 22941459 | 22941562 | . | - | . | transcript_MSTRG.34836.lgene_id | MSTRG.34836; |
| 7 StringTie exon      | 22959270 | 22959380 | . | - | . | transcript_MSTRG.34836.lgene_id | MSTRG.34836; |
| 7 StringTie transcrip | 22889087 | 22956473 | . | - | . | transcript_MSTRG.34838.lgene_id | MSTRG.34838; |
| 7 StringTie exon      | 22889087 | 22889188 | . | - | . | transcript_MSTRG.34838.lgene_id | MSTRG.34838; |
| 7 StringTie exon      | 22938585 | 22938643 | . | - | . | transcript_MSTRG.34838.lgene_id | MSTRG.34838; |
| 7 StringTie exon      | 22956363 | 22956473 | . | - | . | transcript_MSTRG.34838.lgene_id | MSTRG.34838; |
| 7 StringTie transcrip | 22889424 | 22939114 | . | - | . | transcript_MSTRG.34839.lgene_id | MSTRG.34839; |
| 7 StringTie exon      | 22889424 | 22889534 | . | - | . | transcript_MSTRG.34839.lgene_id | MSTRG.34839; |
| 7 StringTie exon      | 22938931 | 22939114 | . | - | . | transcript_MSTRG.34839.lgene_id | MSTRG.34839; |
| 7 StringTie transcrip | 31095624 | 31160767 | . | - | . | transcript_MSTRG.35039.lgene_id | MSTRG.35039; |
| 7 StringTie exon      | 31095624 | 31096592 | . | - | . | transcript_MSTRG.35039.lgene_id | MSTRG.35039; |
| 7 StringTie exon      | 31114614 | 31114734 | . | - | . | transcript_MSTRG.35039.lgene_id | MSTRG.35039; |
| 7 StringTie exon      | 31146135 | 31146236 | . | - | . | transcript_MSTRG.35039.lgene_id | MSTRG.35039; |
| 7 StringTie exon      | 31160686 | 31160767 | . | - | . | transcript_MSTRG.35039.lgene_id | MSTRG.35039; |
| 7 StringTie transcrip | 31095753 | 31160796 | . | - | . | transcript_MSTRG.35039.lgene_id | MSTRG.35039; |
| 7 StringTie exon      | 31095753 | 31096998 | . | - | . | transcript_MSTRG.35039.lgene_id | MSTRG.35039; |
| 7 StringTie exon      | 31114614 | 31114734 | . | - | . | transcript_MSTRG.35039.lgene_id | MSTRG.35039; |
| 7 StringTie exon      | 31146135 | 31146236 | . | - | . | transcript_MSTRG.35039.lgene_id | MSTRG.35039; |
| 7 StringTie exon      | 31160686 | 31160796 | . | - | . | transcript_MSTRG.35039.lgene_id | MSTRG.35039; |
| 7 StringTie transcrip | 31126645 | 31160793 | . | - | . | transcript_MSTRG.35039.lgene_id | MSTRG.35039; |

|                        |          |          |   |   |   |                                 |              |
|------------------------|----------|----------|---|---|---|---------------------------------|--------------|
| 7 StringTie exon       | 31126645 | 31128482 | . | - | . | transcript_MSTRG.35039.(gene_id | MSTRG.35039; |
| 7 StringTie exon       | 31146135 | 31146236 | . | - | . | transcript_MSTRG.35039.(gene_id | MSTRG.35039; |
| 7 StringTie exon       | 31160686 | 31160793 | . | - | . | transcript_MSTRG.35039.(gene_id | MSTRG.35039; |
| 7 StringTie transcript | 35208640 | 35209196 | . | - | . | transcript_MSTRG.35136.(gene_id | MSTRG.35136; |
| 7 StringTie exon       | 35208640 | 35208954 | . | - | . | transcript_MSTRG.35136.(gene_id | MSTRG.35136; |
| 7 StringTie exon       | 35209119 | 35209196 | . | - | . | transcript_MSTRG.35136.(gene_id | MSTRG.35136; |
| 7 StringTie transcript | 35208699 | 35210480 | . | - | . | transcript_MSTRG.35136.(gene_id | MSTRG.35136; |
| 7 StringTie exon       | 35208699 | 35208954 | . | - | . | transcript_MSTRG.35136.(gene_id | MSTRG.35136; |
| 7 StringTie exon       | 35210291 | 35210480 | . | - | . | transcript_MSTRG.35136.(gene_id | MSTRG.35136; |
| 7 StringTie transcript | 38343868 | 38344741 | . | - | . | transcript_MSTRG.35222.(gene_id | MSTRG.35222; |
| 7 StringTie exon       | 38343868 | 38344129 | . | - | . | transcript_MSTRG.35222.(gene_id | MSTRG.35222; |
| 7 StringTie exon       | 38344686 | 38344741 | . | - | . | transcript_MSTRG.35222.(gene_id | MSTRG.35222; |
| 7 StringTie transcript | 43702320 | 43703924 | . | - | . | transcript_MSTRG.35322.(gene_id | MSTRG.35322; |
| 7 StringTie exon       | 43702320 | 43702611 | . | - | . | transcript_MSTRG.35322.(gene_id | MSTRG.35322; |
| 7 StringTie exon       | 43703888 | 43703924 | . | - | . | transcript_MSTRG.35322.(gene_id | MSTRG.35322; |
| 7 StringTie transcript | 46487044 | 46507597 | . | - | . | transcript_MSTRG.35347.(gene_id | MSTRG.35347; |
| 7 StringTie exon       | 46487044 | 46487501 | . | - | . | transcript_MSTRG.35347.(gene_id | MSTRG.35347; |
| 7 StringTie exon       | 46507444 | 46507597 | . | - | . | transcript_MSTRG.35347.(gene_id | MSTRG.35347; |
| 7 StringTie transcript | 53997484 | 54006747 | . | - | . | transcript_MSTRG.35541.(gene_id | MSTRG.35541; |
| 7 StringTie exon       | 53997484 | 53997766 | . | - | . | transcript_MSTRG.35541.(gene_id | MSTRG.35541; |
| 7 StringTie exon       | 53997915 | 53998035 | . | - | . | transcript_MSTRG.35541.(gene_id | MSTRG.35541; |
| 7 StringTie exon       | 53998882 | 53998927 | . | - | . | transcript_MSTRG.35541.(gene_id | MSTRG.35541; |
| 7 StringTie exon       | 54000083 | 54000248 | . | - | . | transcript_MSTRG.35541.(gene_id | MSTRG.35541; |
| 7 StringTie exon       | 54006538 | 54006747 | . | - | . | transcript_MSTRG.35541.(gene_id | MSTRG.35541; |
| 7 StringTie transcript | 55296599 | 55320344 | . | - | . | transcript_MSTRG.35582.(gene_id | MSTRG.35582; |
| 7 StringTie exon       | 55296599 | 55296664 | . | - | . | transcript_MSTRG.35582.(gene_id | MSTRG.35582; |
| 7 StringTie exon       | 55320038 | 55320344 | . | - | . | transcript_MSTRG.35582.(gene_id | MSTRG.35582; |
| 7 StringTie transcript | 56183683 | 56185537 | . | - | . | transcript_MSTRG.35625.(gene_id | MSTRG.35625; |
| 7 StringTie exon       | 56183683 | 56183721 | . | - | . | transcript_MSTRG.35625.(gene_id | MSTRG.35625; |
| 7 StringTie exon       | 56183783 | 56185537 | . | - | . | transcript_MSTRG.35625.(gene_id | MSTRG.35625; |
| 7 StringTie transcript | 68081123 | 68106455 | . | - | . | transcript_MSTRG.35858.(gene_id | MSTRG.35858; |
| 7 StringTie exon       | 68081123 | 68083966 | . | - | . | transcript_MSTRG.35858.(gene_id | MSTRG.35858; |
| 7 StringTie exon       | 68085781 | 68085843 | . | - | . | transcript_MSTRG.35858.(gene_id | MSTRG.35858; |
| 7 StringTie exon       | 68088137 | 68088357 | . | - | . | transcript_MSTRG.35858.(gene_id | MSTRG.35858; |
| 7 StringTie exon       | 68106411 | 68106455 | . | - | . | transcript_MSTRG.35858.(gene_id | MSTRG.35858; |



|                       |          |            |     |                                 |              |
|-----------------------|----------|------------|-----|---------------------------------|--------------|
| 7 StringTie transcrip | 68148804 | 68181655 . | - . | transcript_MSTRG.35864.lgene_id | MSTRG.35864; |
| 7 StringTie exon      | 68148804 | 68148862 . | - . | transcript_MSTRG.35864.lgene_id | MSTRG.35864; |
| 7 StringTie exon      | 68181192 | 68181655 . | - . | transcript_MSTRG.35864.lgene_id | MSTRG.35864; |
| 7 StringTie transcrip | 72784874 | 72804659 . | - . | transcript_MSTRG.35899.lgene_id | MSTRG.35899; |
| 7 StringTie exon      | 72784874 | 72785028 . | - . | transcript_MSTRG.35899.lgene_id | MSTRG.35899; |
| 7 StringTie exon      | 72788765 | 72788840 . | - . | transcript_MSTRG.35899.lgene_id | MSTRG.35899; |
| 7 StringTie exon      | 72804556 | 72804659 . | - . | transcript_MSTRG.35899.lgene_id | MSTRG.35899; |
| 7 StringTie transcrip | 74508881 | 74511647 . | - . | transcript_MSTRG.35911.lgene_id | MSTRG.35911; |
| 7 StringTie exon      | 74508881 | 74509058 . | - . | transcript_MSTRG.35911.lgene_id | MSTRG.35911; |
| 7 StringTie exon      | 74509905 | 74511647 . | - . | transcript_MSTRG.35911.lgene_id | MSTRG.35911; |
| 7 StringTie transcrip | 74790883 | 74847480 . | - . | transcript_MSTRG.35914.lgene_id | MSTRG.35914; |
| 7 StringTie exon      | 74790883 | 74791007 . | - . | transcript_MSTRG.35914.lgene_id | MSTRG.35914; |
| 7 StringTie exon      | 74847260 | 74847480 . | - . | transcript_MSTRG.35914.lgene_id | MSTRG.35914; |
| 7 StringTie transcrip | 74790972 | 74847533 . | - . | transcript_MSTRG.35914.lgene_id | MSTRG.35914; |
| 7 StringTie exon      | 74790972 | 74791007 . | - . | transcript_MSTRG.35914.lgene_id | MSTRG.35914; |
| 7 StringTie exon      | 74795052 | 74795107 . | - . | transcript_MSTRG.35914.lgene_id | MSTRG.35914; |
| 7 StringTie exon      | 74847260 | 74847533 . | - . | transcript_MSTRG.35914.lgene_id | MSTRG.35914; |
| 7 StringTie transcrip | 74981851 | 74982634 . | - . | transcript_MSTRG.35928.lgene_id | MSTRG.35928; |
| 7 StringTie exon      | 74981851 | 74982160 . | - . | transcript_MSTRG.35928.lgene_id | MSTRG.35928; |
| 7 StringTie exon      | 74982498 | 74982634 . | - . | transcript_MSTRG.35928.lgene_id | MSTRG.35928; |
| 7 StringTie transcrip | 86109845 | 86124197 . | - . | transcript_MSTRG.36180.lgene_id | MSTRG.36180; |
| 7 StringTie exon      | 86109845 | 86110331 . | - . | transcript_MSTRG.36180.lgene_id | MSTRG.36180; |
| 7 StringTie exon      | 86115841 | 86115893 . | - . | transcript_MSTRG.36180.lgene_id | MSTRG.36180; |
| 7 StringTie exon      | 86121038 | 86121122 . | - . | transcript_MSTRG.36180.lgene_id | MSTRG.36180; |
| 7 StringTie exon      | 86121693 | 86121761 . | - . | transcript_MSTRG.36180.lgene_id | MSTRG.36180; |
| 7 StringTie exon      | 86124071 | 86124197 . | - . | transcript_MSTRG.36180.lgene_id | MSTRG.36180; |
| 7 StringTie transcrip | 86109965 | 86123864 . | - . | transcript_MSTRG.36180.lgene_id | MSTRG.36180; |
| 7 StringTie exon      | 86109965 | 86110331 . | - . | transcript_MSTRG.36180.lgene_id | MSTRG.36180; |
| 7 StringTie exon      | 86115841 | 86115893 . | - . | transcript_MSTRG.36180.lgene_id | MSTRG.36180; |
| 7 StringTie exon      | 86121038 | 86121122 . | - . | transcript_MSTRG.36180.lgene_id | MSTRG.36180; |
| 7 StringTie exon      | 86121693 | 86121761 . | - . | transcript_MSTRG.36180.lgene_id | MSTRG.36180; |
| 7 StringTie exon      | 86123750 | 86123864 . | - . | transcript_MSTRG.36180.lgene_id | MSTRG.36180; |
| 7 StringTie transcrip | 86109973 | 86123774 . | - . | transcript_MSTRG.36180.lgene_id | MSTRG.36180; |
| 7 StringTie exon      | 86109973 | 86110331 . | - . | transcript_MSTRG.36180.lgene_id | MSTRG.36180; |
| 7 StringTie exon      | 86115565 | 86115893 . | - . | transcript_MSTRG.36180.lgene_id | MSTRG.36180; |

|                        |           |           |   |   |   |                                 |              |
|------------------------|-----------|-----------|---|---|---|---------------------------------|--------------|
| 7 StringTie exon       | 86121038  | 86121122  | . | - | . | transcript_MSTRG.36180.1gene_id | MSTRG.36180; |
| 7 StringTie exon       | 86121693  | 86121761  | . | - | . | transcript_MSTRG.36180.1gene_id | MSTRG.36180; |
| 7 StringTie exon       | 86123504  | 86123774  | . | - | . | transcript_MSTRG.36180.1gene_id | MSTRG.36180; |
| 7 StringTie transcript | 86110027  | 86124187  | . | - | . | transcript_MSTRG.36180.4gene_id | MSTRG.36180; |
| 7 StringTie exon       | 86110027  | 86110331  | . | - | . | transcript_MSTRG.36180.4gene_id | MSTRG.36180; |
| 7 StringTie exon       | 86115565  | 86115631  | . | - | . | transcript_MSTRG.36180.4gene_id | MSTRG.36180; |
| 7 StringTie exon       | 86115841  | 86115893  | . | - | . | transcript_MSTRG.36180.4gene_id | MSTRG.36180; |
| 7 StringTie exon       | 86121038  | 86121122  | . | - | . | transcript_MSTRG.36180.4gene_id | MSTRG.36180; |
| 7 StringTie exon       | 86121693  | 86121761  | . | - | . | transcript_MSTRG.36180.4gene_id | MSTRG.36180; |
| 7 StringTie exon       | 86124071  | 86124187  | . | - | . | transcript_MSTRG.36180.4gene_id | MSTRG.36180; |
| 7 StringTie transcript | 89075192  | 89088317  | . | - | . | transcript_MSTRG.36236.1gene_id | MSTRG.36236; |
| 7 StringTie exon       | 89075192  | 89075218  | . | - | . | transcript_MSTRG.36236.1gene_id | MSTRG.36236; |
| 7 StringTie exon       | 89087874  | 89088317  | . | - | . | transcript_MSTRG.36236.1gene_id | MSTRG.36236; |
| 7 StringTie transcript | 89393376  | 89395254  | . | - | . | transcript_MSTRG.36242.1gene_id | MSTRG.36242; |
| 7 StringTie exon       | 89393376  | 89393588  | . | - | . | transcript_MSTRG.36242.1gene_id | MSTRG.36242; |
| 7 StringTie exon       | 89395171  | 89395254  | . | - | . | transcript_MSTRG.36242.1gene_id | MSTRG.36242; |
| 7 StringTie transcript | 92516548  | 92517863  | . | - | . | transcript_MSTRG.36280.1gene_id | MSTRG.36280; |
| 7 StringTie exon       | 92516548  | 92517268  | . | - | . | transcript_MSTRG.36280.1gene_id | MSTRG.36280; |
| 7 StringTie exon       | 92517650  | 92517863  | . | - | . | transcript_MSTRG.36280.1gene_id | MSTRG.36280; |
| 7 StringTie transcript | 96563474  | 96569077  | . | - | . | transcript_MSTRG.36418.1gene_id | MSTRG.36418; |
| 7 StringTie exon       | 96563474  | 96563557  | . | - | . | transcript_MSTRG.36418.1gene_id | MSTRG.36418; |
| 7 StringTie exon       | 96568407  | 96569077  | . | - | . | transcript_MSTRG.36418.1gene_id | MSTRG.36418; |
| 7 StringTie transcript | 96906048  | 96910879  | . | - | . | transcript_MSTRG.36430.1gene_id | MSTRG.36430; |
| 7 StringTie exon       | 96906048  | 96906428  | . | - | . | transcript_MSTRG.36430.1gene_id | MSTRG.36430; |
| 7 StringTie exon       | 96910669  | 96910879  | . | - | . | transcript_MSTRG.36430.1gene_id | MSTRG.36430; |
| 7 StringTie transcript | 98771174  | 98810283  | . | - | . | transcript_MSTRG.36481.1gene_id | MSTRG.36481; |
| 7 StringTie exon       | 98771174  | 98771272  | . | - | . | transcript_MSTRG.36481.1gene_id | MSTRG.36481; |
| 7 StringTie exon       | 98809790  | 98810283  | . | - | . | transcript_MSTRG.36481.1gene_id | MSTRG.36481; |
| 7 StringTie transcript | 98771300  | 98810283  | . | - | . | transcript_MSTRG.36481.1gene_id | MSTRG.36481; |
| 7 StringTie exon       | 98771300  | 98771410  | . | - | . | transcript_MSTRG.36481.1gene_id | MSTRG.36481; |
| 7 StringTie exon       | 98809940  | 98810283  | . | - | . | transcript_MSTRG.36481.1gene_id | MSTRG.36481; |
| 7 StringTie transcript | 98862257  | 98865063  | . | - | . | transcript_MSTRG.36487.1gene_id | MSTRG.36487; |
| 7 StringTie exon       | 98862257  | 98864342  | . | - | . | transcript_MSTRG.36487.1gene_id | MSTRG.36487; |
| 7 StringTie exon       | 98864720  | 98865063  | . | - | . | transcript_MSTRG.36487.1gene_id | MSTRG.36487; |
| 7 StringTie transcript | 112318632 | 112321512 | . | - | . | transcript_MSTRG.36646.1gene_id | MSTRG.36646; |

|                        |           |           |   |   |   |                                 |              |
|------------------------|-----------|-----------|---|---|---|---------------------------------|--------------|
| 7 StringTie exon       | 112318632 | 112319573 | . | - | . | transcript_MSTRG.36646.lgene_id | MSTRG.36646; |
| 7 StringTie exon       | 112319718 | 112321512 | . | - | . | transcript_MSTRG.36646.lgene_id | MSTRG.36646; |
| 7 StringTie transcript | 114233408 | 114234332 | . | - | . | transcript_MSTRG.36690.lgene_id | MSTRG.36690; |
| 7 StringTie exon       | 114233408 | 114233687 | . | - | . | transcript_MSTRG.36690.lgene_id | MSTRG.36690; |
| 7 StringTie exon       | 114234225 | 114234332 | . | - | . | transcript_MSTRG.36690.lgene_id | MSTRG.36690; |
| 7 StringTie transcript | 115261158 | 115262016 | . | - | . | transcript_MSTRG.36699.lgene_id | MSTRG.36699; |
| 7 StringTie exon       | 115261158 | 115261219 | . | - | . | transcript_MSTRG.36699.lgene_id | MSTRG.36699; |
| 7 StringTie exon       | 115261838 | 115262016 | . | - | . | transcript_MSTRG.36699.lgene_id | MSTRG.36699; |
| 7 StringTie transcript | 118053311 | 118055856 | . | - | . | transcript_MSTRG.36741.lgene_id | MSTRG.36741; |
| 7 StringTie exon       | 118053311 | 118053570 | . | - | . | transcript_MSTRG.36741.lgene_id | MSTRG.36741; |
| 7 StringTie exon       | 118055210 | 118055396 | . | - | . | transcript_MSTRG.36741.lgene_id | MSTRG.36741; |
| 7 StringTie exon       | 118055559 | 118055856 | . | - | . | transcript_MSTRG.36741.lgene_id | MSTRG.36741; |
| 7 StringTie transcript | 118053311 | 118055856 | . | - | . | transcript_MSTRG.36741.lgene_id | MSTRG.36741; |
| 7 StringTie exon       | 118053311 | 118053570 | . | - | . | transcript_MSTRG.36741.lgene_id | MSTRG.36741; |
| 7 StringTie exon       | 118055210 | 118055451 | . | - | . | transcript_MSTRG.36741.lgene_id | MSTRG.36741; |
| 7 StringTie exon       | 118055559 | 118055856 | . | - | . | transcript_MSTRG.36741.lgene_id | MSTRG.36741; |
| 7 StringTie transcript | 118053311 | 118060169 | . | - | . | transcript_MSTRG.36741.lgene_id | MSTRG.36741; |
| 7 StringTie exon       | 118053311 | 118053570 | . | - | . | transcript_MSTRG.36741.lgene_id | MSTRG.36741; |
| 7 StringTie exon       | 118059705 | 118060169 | . | - | . | transcript_MSTRG.36741.lgene_id | MSTRG.36741; |
| 7 StringTie transcript | 118053311 | 118060169 | . | - | . | transcript_MSTRG.36741.lgene_id | MSTRG.36741; |
| 7 StringTie exon       | 118053311 | 118053570 | . | - | . | transcript_MSTRG.36741.lgene_id | MSTRG.36741; |
| 7 StringTie exon       | 118055210 | 118055396 | . | - | . | transcript_MSTRG.36741.lgene_id | MSTRG.36741; |
| 7 StringTie exon       | 118059705 | 118060169 | . | - | . | transcript_MSTRG.36741.lgene_id | MSTRG.36741; |
| 7 StringTie transcript | 118053315 | 118055745 | . | - | . | transcript_MSTRG.36741.lgene_id | MSTRG.36741; |
| 7 StringTie exon       | 118053315 | 118053570 | . | - | . | transcript_MSTRG.36741.lgene_id | MSTRG.36741; |
| 7 StringTie exon       | 118055559 | 118055745 | . | - | . | transcript_MSTRG.36741.lgene_id | MSTRG.36741; |
| 7 StringTie transcript | 118053316 | 118059825 | . | - | . | transcript_MSTRG.36741.lgene_id | MSTRG.36741; |
| 7 StringTie exon       | 118053316 | 118053570 | . | - | . | transcript_MSTRG.36741.lgene_id | MSTRG.36741; |
| 7 StringTie exon       | 118055210 | 118055451 | . | - | . | transcript_MSTRG.36741.lgene_id | MSTRG.36741; |
| 7 StringTie exon       | 118059705 | 118059825 | . | - | . | transcript_MSTRG.36741.lgene_id | MSTRG.36741; |
| 8 StringTie transcript | 383135    | 384704    | . | + | . | transcript_MSTRG.36786.lgene_id | MSTRG.36786; |
| 8 StringTie exon       | 383135    | 383643    | . | + | . | transcript_MSTRG.36786.lgene_id | MSTRG.36786; |
| 8 StringTie exon       | 383824    | 384704    | . | + | . | transcript_MSTRG.36786.lgene_id | MSTRG.36786; |
| 8 StringTie transcript | 6423575   | 6425251   | . | + | . | transcript_MSTRG.36904.lgene_id | MSTRG.36904; |
| 8 StringTie exon       | 6423575   | 6423685   | . | + | . | transcript_MSTRG.36904.lgene_id | MSTRG.36904; |

|                       |          |          |   |   |   |                                 |              |
|-----------------------|----------|----------|---|---|---|---------------------------------|--------------|
| 8 StringTie exon      | 6425157  | 6425251  | . | + | . | transcript_MSTRG.36904.lgene_id | MSTRG.36904; |
| 8 StringTie transcrip | 12702127 | 12712701 | . | + | . | transcript_MSTRG.36980.lgene_id | MSTRG.36980; |
| 8 StringTie exon      | 12702127 | 12702157 | . | + | . | transcript_MSTRG.36980.lgene_id | MSTRG.36980; |
| 8 StringTie exon      | 12712271 | 12712701 | . | + | . | transcript_MSTRG.36980.lgene_id | MSTRG.36980; |
| 8 StringTie transcrip | 18334669 | 18346652 | . | + | . | transcript_MSTRG.37007.lgene_id | MSTRG.37007; |
| 8 StringTie exon      | 18334669 | 18334730 | . | + | . | transcript_MSTRG.37007.lgene_id | MSTRG.37007; |
| 8 StringTie exon      | 18345971 | 18346652 | . | + | . | transcript_MSTRG.37007.lgene_id | MSTRG.37007; |
| 8 StringTie transcrip | 44462502 | 44478675 | . | + | . | transcript_MSTRG.37365.lgene_id | MSTRG.37365; |
| 8 StringTie exon      | 44462502 | 44463138 | . | + | . | transcript_MSTRG.37365.lgene_id | MSTRG.37365; |
| 8 StringTie exon      | 44463875 | 44463924 | . | + | . | transcript_MSTRG.37365.lgene_id | MSTRG.37365; |
| 8 StringTie exon      | 44478046 | 44478675 | . | + | . | transcript_MSTRG.37365.lgene_id | MSTRG.37365; |
| 8 StringTie transcrip | 47007218 | 47010075 | . | + | . | transcript_MSTRG.37379.lgene_id | MSTRG.37379; |
| 8 StringTie exon      | 47007218 | 47007349 | . | + | . | transcript_MSTRG.37379.lgene_id | MSTRG.37379; |
| 8 StringTie exon      | 47008014 | 47008127 | . | + | . | transcript_MSTRG.37379.lgene_id | MSTRG.37379; |
| 8 StringTie exon      | 47009920 | 47010075 | . | + | . | transcript_MSTRG.37379.lgene_id | MSTRG.37379; |
| 8 StringTie transcrip | 47007252 | 47010176 | . | + | . | transcript_MSTRG.37379.lgene_id | MSTRG.37379; |
| 8 StringTie exon      | 47007252 | 47007349 | . | + | . | transcript_MSTRG.37379.lgene_id | MSTRG.37379; |
| 8 StringTie exon      | 47008014 | 47008127 | . | + | . | transcript_MSTRG.37379.lgene_id | MSTRG.37379; |
| 8 StringTie exon      | 47009955 | 47010176 | . | + | . | transcript_MSTRG.37379.lgene_id | MSTRG.37379; |
| 8 StringTie transcrip | 47098463 | 47113139 | . | + | . | transcript_MSTRG.37387.lgene_id | MSTRG.37387; |
| 8 StringTie exon      | 47098463 | 47098632 | . | + | . | transcript_MSTRG.37387.lgene_id | MSTRG.37387; |
| 8 StringTie exon      | 47111487 | 47111728 | . | + | . | transcript_MSTRG.37387.lgene_id | MSTRG.37387; |
| 8 StringTie exon      | 47112088 | 47113139 | . | + | . | transcript_MSTRG.37387.lgene_id | MSTRG.37387; |
| 8 StringTie transcrip | 66129244 | 66132994 | . | + | . | transcript_MSTRG.37594.lgene_id | MSTRG.37594; |
| 8 StringTie exon      | 66129244 | 66129631 | . | + | . | transcript_MSTRG.37594.lgene_id | MSTRG.37594; |
| 8 StringTie exon      | 66132583 | 66132994 | . | + | . | transcript_MSTRG.37594.lgene_id | MSTRG.37594; |
| 8 StringTie transcrip | 66561939 | 66602263 | . | + | . | transcript_MSTRG.37579.lgene_id | MSTRG.37579; |
| 8 StringTie exon      | 66561939 | 66562053 | . | + | . | transcript_MSTRG.37579.lgene_id | MSTRG.37579; |
| 8 StringTie exon      | 66601475 | 66602263 | . | + | . | transcript_MSTRG.37579.lgene_id | MSTRG.37579; |
| 8 StringTie transcrip | 67609057 | 67612680 | . | + | . | transcript_MSTRG.37634.lgene_id | MSTRG.37634; |
| 8 StringTie exon      | 67609057 | 67609342 | . | + | . | transcript_MSTRG.37634.lgene_id | MSTRG.37634; |
| 8 StringTie exon      | 67612599 | 67612680 | . | + | . | transcript_MSTRG.37634.lgene_id | MSTRG.37634; |
| 8 StringTie transcrip | 80889057 | 80898675 | . | + | . | transcript_MSTRG.37826.lgene_id | MSTRG.37826; |
| 8 StringTie exon      | 80889057 | 80889292 | . | + | . | transcript_MSTRG.37826.lgene_id | MSTRG.37826; |
| 8 StringTie exon      | 80897238 | 80897367 | . | + | . | transcript_MSTRG.37826.lgene_id | MSTRG.37826; |

|                       |           |           |   |   |   |                                 |              |
|-----------------------|-----------|-----------|---|---|---|---------------------------------|--------------|
| 8 StringTie exon      | 80897843  | 80898675  | . | + | . | transcript_MSTRG.37826.lgene_id | MSTRG.37826; |
| 8 StringTie transcrip | 85637467  | 85686020  | . | + | . | transcript_MSTRG.37922.lgene_id | MSTRG.37922; |
| 8 StringTie exon      | 85637467  | 85637495  | . | + | . | transcript_MSTRG.37922.lgene_id | MSTRG.37922; |
| 8 StringTie exon      | 85679499  | 85686020  | . | + | . | transcript_MSTRG.37922.lgene_id | MSTRG.37922; |
| 8 StringTie transcrip | 87570303  | 87586268  | . | + | . | transcript_MSTRG.37976.lgene_id | MSTRG.37976; |
| 8 StringTie exon      | 87570303  | 87570375  | . | + | . | transcript_MSTRG.37976.lgene_id | MSTRG.37976; |
| 8 StringTie exon      | 87570618  | 87570820  | . | + | . | transcript_MSTRG.37976.lgene_id | MSTRG.37976; |
| 8 StringTie exon      | 87571470  | 87571641  | . | + | . | transcript_MSTRG.37976.lgene_id | MSTRG.37976; |
| 8 StringTie exon      | 87584914  | 87586268  | . | + | . | transcript_MSTRG.37976.lgene_id | MSTRG.37976; |
| 8 StringTie transcrip | 87570303  | 87608869  | . | + | . | transcript_MSTRG.37976.lgene_id | MSTRG.37976; |
| 8 StringTie exon      | 87570303  | 87570375  | . | + | . | transcript_MSTRG.37976.lgene_id | MSTRG.37976; |
| 8 StringTie exon      | 87570618  | 87570820  | . | + | . | transcript_MSTRG.37976.lgene_id | MSTRG.37976; |
| 8 StringTie exon      | 87571470  | 87571641  | . | + | . | transcript_MSTRG.37976.lgene_id | MSTRG.37976; |
| 8 StringTie exon      | 87608550  | 87608667  | . | + | . | transcript_MSTRG.37976.lgene_id | MSTRG.37976; |
| 8 StringTie exon      | 87608769  | 87608869  | . | + | . | transcript_MSTRG.37976.lgene_id | MSTRG.37976; |
| 8 StringTie transcrip | 96143487  | 96143930  | . | + | . | transcript_MSTRG.38030.lgene_id | MSTRG.38030; |
| 8 StringTie exon      | 96143487  | 96143710  | . | + | . | transcript_MSTRG.38030.lgene_id | MSTRG.38030; |
| 8 StringTie exon      | 96143771  | 96143930  | . | + | . | transcript_MSTRG.38030.lgene_id | MSTRG.38030; |
| 8 StringTie transcrip | 97039024  | 97040520  | . | + | . | transcript_MSTRG.38052.lgene_id | MSTRG.38052; |
| 8 StringTie exon      | 97039024  | 97039059  | . | + | . | transcript_MSTRG.38052.lgene_id | MSTRG.38052; |
| 8 StringTie exon      | 97040307  | 97040520  | . | + | . | transcript_MSTRG.38052.lgene_id | MSTRG.38052; |
| 8 StringTie transcrip | 101284412 | 101297302 | . | + | . | transcript_MSTRG.38105.lgene_id | MSTRG.38105; |
| 8 StringTie exon      | 101284412 | 101284490 | . | + | . | transcript_MSTRG.38105.lgene_id | MSTRG.38105; |
| 8 StringTie exon      | 101284699 | 101284798 | . | + | . | transcript_MSTRG.38105.lgene_id | MSTRG.38105; |
| 8 StringTie exon      | 101287910 | 101287993 | . | + | . | transcript_MSTRG.38105.lgene_id | MSTRG.38105; |
| 8 StringTie exon      | 101290169 | 101290347 | . | + | . | transcript_MSTRG.38105.lgene_id | MSTRG.38105; |
| 8 StringTie exon      | 101291324 | 101291424 | . | + | . | transcript_MSTRG.38105.lgene_id | MSTRG.38105; |
| 8 StringTie exon      | 101295075 | 101297302 | . | + | . | transcript_MSTRG.38105.lgene_id | MSTRG.38105; |
| 8 StringTie transcrip | 110006401 | 110006972 | . | + | . | transcript_MSTRG.38201.lgene_id | MSTRG.38201; |
| 8 StringTie exon      | 110006401 | 110006456 | . | + | . | transcript_MSTRG.38201.lgene_id | MSTRG.38201; |
| 8 StringTie exon      | 110006731 | 110006972 | . | + | . | transcript_MSTRG.38201.lgene_id | MSTRG.38201; |
| 8 StringTie transcrip | 110461832 | 110470144 | . | + | . | transcript_MSTRG.38246.lgene_id | MSTRG.38246; |
| 8 StringTie exon      | 110461832 | 110462370 | . | + | . | transcript_MSTRG.38246.lgene_id | MSTRG.38246; |
| 8 StringTie exon      | 110463506 | 110470144 | . | + | . | transcript_MSTRG.38246.lgene_id | MSTRG.38246; |
| 8 StringTie transcrip | 110471344 | 110486374 | . | + | . | transcript_MSTRG.38247.lgene_id | MSTRG.38247; |

|                        |           |           |   |   |   |                                 |              |
|------------------------|-----------|-----------|---|---|---|---------------------------------|--------------|
| 8 StringTie exon       | 110471344 | 110473307 | . | + | . | transcript_MSTRG.38247.lgene_id | MSTRG.38247; |
| 8 StringTie exon       | 110474400 | 110486374 | . | + | . | transcript_MSTRG.38247.lgene_id | MSTRG.38247; |
| 8 StringTie transcript | 110505292 | 111529703 | . | + | . | transcript_MSTRG.38248.lgene_id | MSTRG.38248; |
| 8 StringTie exon       | 110505292 | 110505397 | . | + | . | transcript_MSTRG.38248.lgene_id | MSTRG.38248; |
| 8 StringTie exon       | 110555988 | 110556063 | . | + | . | transcript_MSTRG.38248.lgene_id | MSTRG.38248; |
| 8 StringTie exon       | 110775738 | 110775865 | . | + | . | transcript_MSTRG.38248.lgene_id | MSTRG.38248; |
| 8 StringTie exon       | 110965934 | 110966000 | . | + | . | transcript_MSTRG.38248.lgene_id | MSTRG.38248; |
| 8 StringTie exon       | 111092560 | 111092630 | . | + | . | transcript_MSTRG.38248.lgene_id | MSTRG.38248; |
| 8 StringTie exon       | 111411576 | 111411717 | . | + | . | transcript_MSTRG.38248.lgene_id | MSTRG.38248; |
| 8 StringTie exon       | 111416359 | 111416443 | . | + | . | transcript_MSTRG.38248.lgene_id | MSTRG.38248; |
| 8 StringTie exon       | 111424351 | 111424432 | . | + | . | transcript_MSTRG.38248.lgene_id | MSTRG.38248; |
| 8 StringTie exon       | 111529682 | 111529703 | . | + | . | transcript_MSTRG.38248.lgene_id | MSTRG.38248; |
| 8 StringTie transcript | 110529009 | 110637001 | . | + | . | transcript_MSTRG.38248.lgene_id | MSTRG.38248; |
| 8 StringTie exon       | 110529009 | 110529081 | . | + | . | transcript_MSTRG.38248.lgene_id | MSTRG.38248; |
| 8 StringTie exon       | 110538148 | 110538202 | . | + | . | transcript_MSTRG.38248.lgene_id | MSTRG.38248; |
| 8 StringTie exon       | 110555988 | 110556063 | . | + | . | transcript_MSTRG.38248.lgene_id | MSTRG.38248; |
| 8 StringTie exon       | 110636950 | 110637001 | . | + | . | transcript_MSTRG.38248.lgene_id | MSTRG.38248; |
| 8 StringTie transcript | 111753849 | 111953369 | . | + | . | transcript_MSTRG.38257.lgene_id | MSTRG.38257; |
| 8 StringTie exon       | 111753849 | 111753899 | . | + | . | transcript_MSTRG.38257.lgene_id | MSTRG.38257; |
| 8 StringTie exon       | 111817010 | 111817103 | . | + | . | transcript_MSTRG.38257.lgene_id | MSTRG.38257; |
| 8 StringTie exon       | 111829191 | 111829302 | . | + | . | transcript_MSTRG.38257.lgene_id | MSTRG.38257; |
| 8 StringTie exon       | 111952613 | 111953369 | . | + | . | transcript_MSTRG.38257.lgene_id | MSTRG.38257; |
| 8 StringTie transcript | 111753858 | 111832456 | . | + | . | transcript_MSTRG.38257.lgene_id | MSTRG.38257; |
| 8 StringTie exon       | 111753858 | 111753899 | . | + | . | transcript_MSTRG.38257.lgene_id | MSTRG.38257; |
| 8 StringTie exon       | 111829191 | 111832456 | . | + | . | transcript_MSTRG.38257.lgene_id | MSTRG.38257; |
| 8 StringTie transcript | 111817044 | 111864063 | . | + | . | transcript_MSTRG.38257.lgene_id | MSTRG.38257; |
| 8 StringTie exon       | 111817044 | 111817103 | . | + | . | transcript_MSTRG.38257.lgene_id | MSTRG.38257; |
| 8 StringTie exon       | 111829191 | 111829302 | . | + | . | transcript_MSTRG.38257.lgene_id | MSTRG.38257; |
| 8 StringTie exon       | 111862969 | 111864063 | . | + | . | transcript_MSTRG.38257.lgene_id | MSTRG.38257; |
| 8 StringTie transcript | 112324568 | 112338138 | . | + | . | transcript_MSTRG.38291.lgene_id | MSTRG.38291; |
| 8 StringTie exon       | 112324568 | 112324624 | . | + | . | transcript_MSTRG.38291.lgene_id | MSTRG.38291; |
| 8 StringTie exon       | 112337924 | 112338138 | . | + | . | transcript_MSTRG.38291.lgene_id | MSTRG.38291; |
| 8 StringTie transcript | 114146088 | 114170135 | . | + | . | transcript_MSTRG.38339.lgene_id | MSTRG.38339; |
| 8 StringTie exon       | 114146088 | 114146144 | . | + | . | transcript_MSTRG.38339.lgene_id | MSTRG.38339; |
| 8 StringTie exon       | 114146846 | 114146935 | . | + | . | transcript_MSTRG.38339.lgene_id | MSTRG.38339; |

|                       |           |           |   |   |   |                                 |              |
|-----------------------|-----------|-----------|---|---|---|---------------------------------|--------------|
| 8 StringTie exon      | 114169795 | 114170135 | . | + | . | transcript_MSTRG.38339.lgene_id | MSTRG.38339; |
| 8 StringTie transcrip | 130468075 | 130471802 | . | + | . | transcript_MSTRG.38617.lgene_id | MSTRG.38617; |
| 8 StringTie exon      | 130468075 | 130468278 | . | + | . | transcript_MSTRG.38617.lgene_id | MSTRG.38617; |
| 8 StringTie exon      | 130470334 | 130471802 | . | + | . | transcript_MSTRG.38617.lgene_id | MSTRG.38617; |
| 8 StringTie transcrip | 130950605 | 131007824 | . | + | . | transcript_MSTRG.38633.lgene_id | MSTRG.38633; |
| 8 StringTie exon      | 130950605 | 130950627 | . | + | . | transcript_MSTRG.38633.lgene_id | MSTRG.38633; |
| 8 StringTie exon      | 131007251 | 131007824 | . | + | . | transcript_MSTRG.38633.lgene_id | MSTRG.38633; |
| 8 StringTie transcrip | 131473758 | 131487268 | . | + | . | transcript_MSTRG.38639.lgene_id | MSTRG.38639; |
| 8 StringTie exon      | 131473758 | 131473952 | . | + | . | transcript_MSTRG.38639.lgene_id | MSTRG.38639; |
| 8 StringTie exon      | 131487197 | 131487268 | . | + | . | transcript_MSTRG.38639.lgene_id | MSTRG.38639; |
| 8 StringTie transcrip | 135204061 | 135206417 | . | + | . | transcript_MSTRG.38723.lgene_id | MSTRG.38723; |
| 8 StringTie exon      | 135204061 | 135204168 | . | + | . | transcript_MSTRG.38723.lgene_id | MSTRG.38723; |
| 8 StringTie exon      | 135206109 | 135206417 | . | + | . | transcript_MSTRG.38723.lgene_id | MSTRG.38723; |
| 8 StringTie transcrip | 135420747 | 135429670 | . | + | . | transcript_MSTRG.38761.lgene_id | MSTRG.38761; |
| 8 StringTie exon      | 135420747 | 135421042 | . | + | . | transcript_MSTRG.38761.lgene_id | MSTRG.38761; |
| 8 StringTie exon      | 135421180 | 135421328 | . | + | . | transcript_MSTRG.38761.lgene_id | MSTRG.38761; |
| 8 StringTie exon      | 135424299 | 135424367 | . | + | . | transcript_MSTRG.38761.lgene_id | MSTRG.38761; |
| 8 StringTie exon      | 135426086 | 135426180 | . | + | . | transcript_MSTRG.38761.lgene_id | MSTRG.38761; |
| 8 StringTie exon      | 135426403 | 135426542 | . | + | . | transcript_MSTRG.38761.lgene_id | MSTRG.38761; |
| 8 StringTie exon      | 135426893 | 135426969 | . | + | . | transcript_MSTRG.38761.lgene_id | MSTRG.38761; |
| 8 StringTie exon      | 135428264 | 135429670 | . | + | . | transcript_MSTRG.38761.lgene_id | MSTRG.38761; |
| 8 StringTie transcrip | 356620    | 367097    | . | - | . | transcript_MSTRG.36784.lgene_id | MSTRG.36784; |
| 8 StringTie exon      | 356620    | 357880    | . | - | . | transcript_MSTRG.36784.lgene_id | MSTRG.36784; |
| 8 StringTie exon      | 363181    | 363222    | . | - | . | transcript_MSTRG.36784.lgene_id | MSTRG.36784; |
| 8 StringTie exon      | 366871    | 367097    | . | - | . | transcript_MSTRG.36784.lgene_id | MSTRG.36784; |
| 8 StringTie transcrip | 356893    | 366712    | . | - | . | transcript_MSTRG.36784.lgene_id | MSTRG.36784; |
| 8 StringTie exon      | 356893    | 357880    | . | - | . | transcript_MSTRG.36784.lgene_id | MSTRG.36784; |
| 8 StringTie exon      | 363181    | 363222    | . | - | . | transcript_MSTRG.36784.lgene_id | MSTRG.36784; |
| 8 StringTie exon      | 364467    | 364557    | . | - | . | transcript_MSTRG.36784.lgene_id | MSTRG.36784; |
| 8 StringTie exon      | 366031    | 366123    | . | - | . | transcript_MSTRG.36784.lgene_id | MSTRG.36784; |
| 8 StringTie exon      | 366459    | 366712    | . | - | . | transcript_MSTRG.36784.lgene_id | MSTRG.36784; |
| 8 StringTie transcrip | 356907    | 366093    | . | - | . | transcript_MSTRG.36784.lgene_id | MSTRG.36784; |
| 8 StringTie exon      | 356907    | 357880    | . | - | . | transcript_MSTRG.36784.lgene_id | MSTRG.36784; |
| 8 StringTie exon      | 362139    | 362242    | . | - | . | transcript_MSTRG.36784.lgene_id | MSTRG.36784; |
| 8 StringTie exon      | 363181    | 363222    | . | - | . | transcript_MSTRG.36784.lgene_id | MSTRG.36784; |

|                       |          |            |     |                                 |              |
|-----------------------|----------|------------|-----|---------------------------------|--------------|
| 8 StringTie exon      | 366031   | 366093 .   | - . | transcript_MSTRG.36784.4gene_id | MSTRG.36784; |
| 8 StringTie transcrip | 399242   | 399928 .   | - . | transcript_MSTRG.36788.1gene_id | MSTRG.36788; |
| 8 StringTie exon      | 399242   | 399550 .   | - . | transcript_MSTRG.36788.1gene_id | MSTRG.36788; |
| 8 StringTie exon      | 399840   | 399928 .   | - . | transcript_MSTRG.36788.1gene_id | MSTRG.36788; |
| 8 StringTie transcrip | 1382347  | 1387543 .  | - . | transcript_MSTRG.36831.1gene_id | MSTRG.36831; |
| 8 StringTie exon      | 1382347  | 1382810 .  | - . | transcript_MSTRG.36831.1gene_id | MSTRG.36831; |
| 8 StringTie exon      | 1382907  | 1383122 .  | - . | transcript_MSTRG.36831.1gene_id | MSTRG.36831; |
| 8 StringTie exon      | 1386949  | 1387543 .  | - . | transcript_MSTRG.36831.1gene_id | MSTRG.36831; |
| 8 StringTie transcrip | 3764933  | 3768937 .  | - . | transcript_MSTRG.36865.1gene_id | MSTRG.36865; |
| 8 StringTie exon      | 3764933  | 3765306 .  | - . | transcript_MSTRG.36865.1gene_id | MSTRG.36865; |
| 8 StringTie exon      | 3768365  | 3768435 .  | - . | transcript_MSTRG.36865.1gene_id | MSTRG.36865; |
| 8 StringTie exon      | 3768815  | 3768937 .  | - . | transcript_MSTRG.36865.1gene_id | MSTRG.36865; |
| 8 StringTie transcrip | 3764945  | 3768925 .  | - . | transcript_MSTRG.36865.4gene_id | MSTRG.36865; |
| 8 StringTie exon      | 3764945  | 3765306 .  | - . | transcript_MSTRG.36865.4gene_id | MSTRG.36865; |
| 8 StringTie exon      | 3768815  | 3768925 .  | - . | transcript_MSTRG.36865.4gene_id | MSTRG.36865; |
| 8 StringTie transcrip | 10748769 | 10750464 . | - . | transcript_MSTRG.36945.1gene_id | MSTRG.36945; |
| 8 StringTie exon      | 10748769 | 10749034 . | - . | transcript_MSTRG.36945.1gene_id | MSTRG.36945; |
| 8 StringTie exon      | 10749422 | 10749480 . | - . | transcript_MSTRG.36945.1gene_id | MSTRG.36945; |
| 8 StringTie exon      | 10750109 | 10750464 . | - . | transcript_MSTRG.36945.1gene_id | MSTRG.36945; |
| 8 StringTie transcrip | 12467608 | 12525499 . | - . | transcript_MSTRG.36971.1gene_id | MSTRG.36971; |
| 8 StringTie exon      | 12467608 | 12467701 . | - . | transcript_MSTRG.36971.1gene_id | MSTRG.36971; |
| 8 StringTie exon      | 12494816 | 12494904 . | - . | transcript_MSTRG.36971.1gene_id | MSTRG.36971; |
| 8 StringTie exon      | 12525413 | 12525499 . | - . | transcript_MSTRG.36971.1gene_id | MSTRG.36971; |
| 8 StringTie transcrip | 19969758 | 19975904 . | - . | transcript_MSTRG.37047.1gene_id | MSTRG.37047; |
| 8 StringTie exon      | 19969758 | 19970530 . | - . | transcript_MSTRG.37047.1gene_id | MSTRG.37047; |
| 8 StringTie exon      | 19974013 | 19975904 . | - . | transcript_MSTRG.37047.1gene_id | MSTRG.37047; |
| 8 StringTie transcrip | 28306560 | 28306822 . | - . | transcript_MSTRG.37120.4gene_id | MSTRG.37120; |
| 8 StringTie exon      | 28306560 | 28306657 . | - . | transcript_MSTRG.37120.4gene_id | MSTRG.37120; |
| 8 StringTie exon      | 28306685 | 28306822 . | - . | transcript_MSTRG.37120.4gene_id | MSTRG.37120; |
| 8 StringTie transcrip | 28306560 | 28306822 . | - . | transcript_MSTRG.37120.1gene_id | MSTRG.37120; |
| 8 StringTie exon      | 28306560 | 28306684 . | - . | transcript_MSTRG.37120.1gene_id | MSTRG.37120; |
| 8 StringTie exon      | 28306712 | 28306822 . | - . | transcript_MSTRG.37120.1gene_id | MSTRG.37120; |
| 8 StringTie transcrip | 33359097 | 33379503 . | - . | transcript_MSTRG.37196.1gene_id | MSTRG.37196; |
| 8 StringTie exon      | 33359097 | 33359216 . | - . | transcript_MSTRG.37196.1gene_id | MSTRG.37196; |
| 8 StringTie exon      | 33378424 | 33379503 . | - . | transcript_MSTRG.37196.1gene_id | MSTRG.37196; |



|                       |          |            |     |                                 |              |
|-----------------------|----------|------------|-----|---------------------------------|--------------|
| 8 StringTie transcrip | 70082397 | 70083634 . | - . | transcript_MSTRG.37649.lgene_id | MSTRG.37649; |
| 8 StringTie exon      | 70082397 | 70082546 . | - . | transcript_MSTRG.37649.lgene_id | MSTRG.37649; |
| 8 StringTie exon      | 70083500 | 70083634 . | - . | transcript_MSTRG.37649.lgene_id | MSTRG.37649; |
| 8 StringTie transcrip | 70099227 | 70100969 . | - . | transcript_MSTRG.37650.lgene_id | MSTRG.37650; |
| 8 StringTie exon      | 70099227 | 70099294 . | - . | transcript_MSTRG.37650.lgene_id | MSTRG.37650; |
| 8 StringTie exon      | 70100175 | 70100308 . | - . | transcript_MSTRG.37650.lgene_id | MSTRG.37650; |
| 8 StringTie exon      | 70100844 | 70100969 . | - . | transcript_MSTRG.37650.lgene_id | MSTRG.37650; |
| 8 StringTie transcrip | 74651533 | 74655677 . | - . | transcript_MSTRG.37750.lgene_id | MSTRG.37750; |
| 8 StringTie exon      | 74651533 | 74652534 . | - . | transcript_MSTRG.37750.lgene_id | MSTRG.37750; |
| 8 StringTie exon      | 74655286 | 74655677 . | - . | transcript_MSTRG.37750.lgene_id | MSTRG.37750; |
| 8 StringTie transcrip | 81070886 | 81085666 . | - . | transcript_MSTRG.37830.lgene_id | MSTRG.37830; |
| 8 StringTie exon      | 81070886 | 81070900 . | - . | transcript_MSTRG.37830.lgene_id | MSTRG.37830; |
| 8 StringTie exon      | 81085009 | 81085666 . | - . | transcript_MSTRG.37830.lgene_id | MSTRG.37830; |
| 8 StringTie transcrip | 86070145 | 86071701 . | - . | transcript_MSTRG.37921.lgene_id | MSTRG.37921; |
| 8 StringTie exon      | 86070145 | 86070304 . | - . | transcript_MSTRG.37921.lgene_id | MSTRG.37921; |
| 8 StringTie exon      | 86071519 | 86071701 . | - . | transcript_MSTRG.37921.lgene_id | MSTRG.37921; |
| 8 StringTie transcrip | 87459092 | 87461393 . | - . | transcript_MSTRG.37941.lgene_id | MSTRG.37941; |
| 8 StringTie exon      | 87459092 | 87460067 . | - . | transcript_MSTRG.37941.lgene_id | MSTRG.37941; |
| 8 StringTie exon      | 87460710 | 87460856 . | - . | transcript_MSTRG.37941.lgene_id | MSTRG.37941; |
| 8 StringTie exon      | 87461001 | 87461098 . | - . | transcript_MSTRG.37941.lgene_id | MSTRG.37941; |
| 8 StringTie exon      | 87461195 | 87461393 . | - . | transcript_MSTRG.37941.lgene_id | MSTRG.37941; |
| 8 StringTie transcrip | 87459092 | 87461393 . | - . | transcript_MSTRG.37941.lgene_id | MSTRG.37941; |
| 8 StringTie exon      | 87459092 | 87460067 . | - . | transcript_MSTRG.37941.lgene_id | MSTRG.37941; |
| 8 StringTie exon      | 87460710 | 87460856 . | - . | transcript_MSTRG.37941.lgene_id | MSTRG.37941; |
| 8 StringTie exon      | 87461001 | 87461098 . | - . | transcript_MSTRG.37941.lgene_id | MSTRG.37941; |
| 8 StringTie exon      | 87461190 | 87461393 . | - . | transcript_MSTRG.37941.lgene_id | MSTRG.37941; |
| 8 StringTie transcrip | 87459586 | 87461342 . | - . | transcript_MSTRG.37941.lgene_id | MSTRG.37941; |
| 8 StringTie exon      | 87459586 | 87460067 . | - . | transcript_MSTRG.37941.lgene_id | MSTRG.37941; |
| 8 StringTie exon      | 87461001 | 87461098 . | - . | transcript_MSTRG.37941.lgene_id | MSTRG.37941; |
| 8 StringTie exon      | 87461195 | 87461342 . | - . | transcript_MSTRG.37941.lgene_id | MSTRG.37941; |
| 8 StringTie transcrip | 87459586 | 87461342 . | - . | transcript_MSTRG.37941.lgene_id | MSTRG.37941; |
| 8 StringTie exon      | 87459586 | 87460067 . | - . | transcript_MSTRG.37941.lgene_id | MSTRG.37941; |
| 8 StringTie exon      | 87461001 | 87461098 . | - . | transcript_MSTRG.37941.lgene_id | MSTRG.37941; |
| 8 StringTie exon      | 87461190 | 87461342 . | - . | transcript_MSTRG.37941.lgene_id | MSTRG.37941; |
| 8 StringTie transcrip | 87459586 | 87464714 . | - . | transcript_MSTRG.37941.lgene_id | MSTRG.37941; |

|                        |           |           |   |   |   |                                  |              |
|------------------------|-----------|-----------|---|---|---|----------------------------------|--------------|
| 8 StringTie exon       | 87459586  | 87460067  | . | - | . | transcript_MSTRG.37941.1.gene_id | MSTRG.37941; |
| 8 StringTie exon       | 87461001  | 87461098  | . | - | . | transcript_MSTRG.37941.1.gene_id | MSTRG.37941; |
| 8 StringTie exon       | 87463798  | 87463858  | . | - | . | transcript_MSTRG.37941.1.gene_id | MSTRG.37941; |
| 8 StringTie exon       | 87464283  | 87464348  | . | - | . | transcript_MSTRG.37941.1.gene_id | MSTRG.37941; |
| 8 StringTie exon       | 87464522  | 87464714  | . | - | . | transcript_MSTRG.37941.1.gene_id | MSTRG.37941; |
| 8 StringTie transcript | 87459601  | 87464333  | . | - | . | transcript_MSTRG.37941.1.gene_id | MSTRG.37941; |
| 8 StringTie exon       | 87459601  | 87460067  | . | - | . | transcript_MSTRG.37941.1.gene_id | MSTRG.37941; |
| 8 StringTie exon       | 87461001  | 87461101  | . | - | . | transcript_MSTRG.37941.1.gene_id | MSTRG.37941; |
| 8 StringTie exon       | 87463798  | 87463858  | . | - | . | transcript_MSTRG.37941.1.gene_id | MSTRG.37941; |
| 8 StringTie exon       | 87464283  | 87464333  | . | - | . | transcript_MSTRG.37941.1.gene_id | MSTRG.37941; |
| 8 StringTie transcript | 96540536  | 96693882  | . | - | . | transcript_MSTRG.38032.1.gene_id | MSTRG.38032; |
| 8 StringTie exon       | 96540536  | 96540614  | . | - | . | transcript_MSTRG.38032.1.gene_id | MSTRG.38032; |
| 8 StringTie exon       | 96648481  | 96648672  | . | - | . | transcript_MSTRG.38032.1.gene_id | MSTRG.38032; |
| 8 StringTie exon       | 96686661  | 96686766  | . | - | . | transcript_MSTRG.38032.1.gene_id | MSTRG.38032; |
| 8 StringTie exon       | 96687384  | 96687491  | . | - | . | transcript_MSTRG.38032.1.gene_id | MSTRG.38032; |
| 8 StringTie exon       | 96693440  | 96693882  | . | - | . | transcript_MSTRG.38032.1.gene_id | MSTRG.38032; |
| 8 StringTie transcript | 96665514  | 96693946  | . | - | . | transcript_MSTRG.38032.1.gene_id | MSTRG.38032; |
| 8 StringTie exon       | 96665514  | 96665584  | . | - | . | transcript_MSTRG.38032.1.gene_id | MSTRG.38032; |
| 8 StringTie exon       | 96686661  | 96686766  | . | - | . | transcript_MSTRG.38032.1.gene_id | MSTRG.38032; |
| 8 StringTie exon       | 96687384  | 96687491  | . | - | . | transcript_MSTRG.38032.1.gene_id | MSTRG.38032; |
| 8 StringTie exon       | 96693440  | 96693946  | . | - | . | transcript_MSTRG.38032.1.gene_id | MSTRG.38032; |
| 8 StringTie transcript | 96263368  | 96328921  | . | - | . | transcript_MSTRG.38033.1.gene_id | MSTRG.38033; |
| 8 StringTie exon       | 96263368  | 96263402  | . | - | . | transcript_MSTRG.38033.1.gene_id | MSTRG.38033; |
| 8 StringTie exon       | 96328684  | 96328921  | . | - | . | transcript_MSTRG.38033.1.gene_id | MSTRG.38033; |
| 8 StringTie transcript | 99776346  | 100200974 | . | - | . | transcript_MSTRG.38082.1.gene_id | MSTRG.38082; |
| 8 StringTie exon       | 99776346  | 99776728  | . | - | . | transcript_MSTRG.38082.1.gene_id | MSTRG.38082; |
| 8 StringTie exon       | 99967575  | 99967669  | . | - | . | transcript_MSTRG.38082.1.gene_id | MSTRG.38082; |
| 8 StringTie exon       | 100071700 | 100071786 | . | - | . | transcript_MSTRG.38082.1.gene_id | MSTRG.38082; |
| 8 StringTie exon       | 100200731 | 100200974 | . | - | . | transcript_MSTRG.38082.1.gene_id | MSTRG.38082; |
| 8 StringTie transcript | 99776346  | 100200974 | . | - | . | transcript_MSTRG.38082.1.gene_id | MSTRG.38082; |
| 8 StringTie exon       | 99776346  | 99776728  | . | - | . | transcript_MSTRG.38082.1.gene_id | MSTRG.38082; |
| 8 StringTie exon       | 99899201  | 99899317  | . | - | . | transcript_MSTRG.38082.1.gene_id | MSTRG.38082; |
| 8 StringTie exon       | 99967575  | 99967669  | . | - | . | transcript_MSTRG.38082.1.gene_id | MSTRG.38082; |
| 8 StringTie exon       | 100071700 | 100071786 | . | - | . | transcript_MSTRG.38082.1.gene_id | MSTRG.38082; |
| 8 StringTie exon       | 100200731 | 100200974 | . | - | . | transcript_MSTRG.38082.1.gene_id | MSTRG.38082; |

|                       |           |           |   |   |   |                         |          |              |
|-----------------------|-----------|-----------|---|---|---|-------------------------|----------|--------------|
| 8 StringTie transcrip | 104403036 | 104489752 | . | - | . | transcript_MSTRG.38154. | lgene_id | MSTRG.38154; |
| 8 StringTie exon      | 104403036 | 104403062 | . | - | . | transcript_MSTRG.38154. | lgene_id | MSTRG.38154; |
| 8 StringTie exon      | 104414579 | 104414627 | . | - | . | transcript_MSTRG.38154. | lgene_id | MSTRG.38154; |
| 8 StringTie exon      | 104417213 | 104417327 | . | - | . | transcript_MSTRG.38154. | lgene_id | MSTRG.38154; |
| 8 StringTie exon      | 104420833 | 104420922 | . | - | . | transcript_MSTRG.38154. | lgene_id | MSTRG.38154; |
| 8 StringTie exon      | 104459229 | 104459289 | . | - | . | transcript_MSTRG.38154. | lgene_id | MSTRG.38154; |
| 8 StringTie exon      | 104489701 | 104489752 | . | - | . | transcript_MSTRG.38154. | lgene_id | MSTRG.38154; |
| 8 StringTie transcrip | 104412692 | 104489769 | . | - | . | transcript_MSTRG.38154. | lgene_id | MSTRG.38154; |
| 8 StringTie exon      | 104412692 | 104413029 | . | - | . | transcript_MSTRG.38154. | lgene_id | MSTRG.38154; |
| 8 StringTie exon      | 104414579 | 104414627 | . | - | . | transcript_MSTRG.38154. | lgene_id | MSTRG.38154; |
| 8 StringTie exon      | 104417213 | 104417327 | . | - | . | transcript_MSTRG.38154. | lgene_id | MSTRG.38154; |
| 8 StringTie exon      | 104420833 | 104420922 | . | - | . | transcript_MSTRG.38154. | lgene_id | MSTRG.38154; |
| 8 StringTie exon      | 104459229 | 104459289 | . | - | . | transcript_MSTRG.38154. | lgene_id | MSTRG.38154; |
| 8 StringTie exon      | 104489701 | 104489769 | . | - | . | transcript_MSTRG.38154. | lgene_id | MSTRG.38154; |
| 8 StringTie transcrip | 104412885 | 104459292 | . | - | . | transcript_MSTRG.38154. | lgene_id | MSTRG.38154; |
| 8 StringTie exon      | 104412885 | 104412969 | . | - | . | transcript_MSTRG.38154. | lgene_id | MSTRG.38154; |
| 8 StringTie exon      | 104414579 | 104414627 | . | - | . | transcript_MSTRG.38154. | lgene_id | MSTRG.38154; |
| 8 StringTie exon      | 104417213 | 104417327 | . | - | . | transcript_MSTRG.38154. | lgene_id | MSTRG.38154; |
| 8 StringTie exon      | 104417406 | 104417499 | . | - | . | transcript_MSTRG.38154. | lgene_id | MSTRG.38154; |
| 8 StringTie exon      | 104420829 | 104420922 | . | - | . | transcript_MSTRG.38154. | lgene_id | MSTRG.38154; |
| 8 StringTie exon      | 104459229 | 104459292 | . | - | . | transcript_MSTRG.38154. | lgene_id | MSTRG.38154; |
| 8 StringTie transcrip | 104412895 | 104459275 | . | - | . | transcript_MSTRG.38154. | lgene_id | MSTRG.38154; |
| 8 StringTie exon      | 104412895 | 104412969 | . | - | . | transcript_MSTRG.38154. | lgene_id | MSTRG.38154; |
| 8 StringTie exon      | 104414579 | 104414627 | . | - | . | transcript_MSTRG.38154. | lgene_id | MSTRG.38154; |
| 8 StringTie exon      | 104417213 | 104417327 | . | - | . | transcript_MSTRG.38154. | lgene_id | MSTRG.38154; |
| 8 StringTie exon      | 104420833 | 104420922 | . | - | . | transcript_MSTRG.38154. | lgene_id | MSTRG.38154; |
| 8 StringTie exon      | 104459229 | 104459275 | . | - | . | transcript_MSTRG.38154. | lgene_id | MSTRG.38154; |
| 8 StringTie transcrip | 105197395 | 105198092 | . | - | . | transcript_MSTRG.38184. | lgene_id | MSTRG.38184; |
| 8 StringTie exon      | 105197395 | 105197504 | . | - | . | transcript_MSTRG.38184. | lgene_id | MSTRG.38184; |
| 8 StringTie exon      | 105197688 | 105197731 | . | - | . | transcript_MSTRG.38184. | lgene_id | MSTRG.38184; |
| 8 StringTie exon      | 105197982 | 105198092 | . | - | . | transcript_MSTRG.38184. | lgene_id | MSTRG.38184; |
| 8 StringTie transcrip | 110181202 | 110181841 | . | - | . | transcript_MSTRG.38238. | lgene_id | MSTRG.38238; |
| 8 StringTie exon      | 110181202 | 110181519 | . | - | . | transcript_MSTRG.38238. | lgene_id | MSTRG.38238; |
| 8 StringTie exon      | 110181771 | 110181841 | . | - | . | transcript_MSTRG.38238. | lgene_id | MSTRG.38238; |
| 8 StringTie transcrip | 110377878 | 110378293 | . | - | . | transcript_MSTRG.38240. | lgene_id | MSTRG.38240; |

|                        |           |           |   |   |   |                                 |              |
|------------------------|-----------|-----------|---|---|---|---------------------------------|--------------|
| 8 StringTie exon       | 110377878 | 110378156 | . | - | . | transcript_MSTRG.38240.lgene_id | MSTRG.38240; |
| 8 StringTie exon       | 110378253 | 110378293 | . | - | . | transcript_MSTRG.38240.lgene_id | MSTRG.38240; |
| 8 StringTie transcript | 111258562 | 111264177 | . | - | . | transcript_MSTRG.38252.lgene_id | MSTRG.38252; |
| 8 StringTie exon       | 111258562 | 111259567 | . | - | . | transcript_MSTRG.38252.lgene_id | MSTRG.38252; |
| 8 StringTie exon       | 111263855 | 111264177 | . | - | . | transcript_MSTRG.38252.lgene_id | MSTRG.38252; |
| 8 StringTie transcript | 111984934 | 112028160 | . | - | . | transcript_MSTRG.38284.lgene_id | MSTRG.38284; |
| 8 StringTie exon       | 111984934 | 111985548 | . | - | . | transcript_MSTRG.38284.lgene_id | MSTRG.38284; |
| 8 StringTie exon       | 112016351 | 112016435 | . | - | . | transcript_MSTRG.38284.lgene_id | MSTRG.38284; |
| 8 StringTie exon       | 112017025 | 112017167 | . | - | . | transcript_MSTRG.38284.lgene_id | MSTRG.38284; |
| 8 StringTie exon       | 112028082 | 112028160 | . | - | . | transcript_MSTRG.38284.lgene_id | MSTRG.38284; |
| 8 StringTie transcript | 112012623 | 112028184 | . | - | . | transcript_MSTRG.38284.lgene_id | MSTRG.38284; |
| 8 StringTie exon       | 112012623 | 112015021 | . | - | . | transcript_MSTRG.38284.lgene_id | MSTRG.38284; |
| 8 StringTie exon       | 112016351 | 112016435 | . | - | . | transcript_MSTRG.38284.lgene_id | MSTRG.38284; |
| 8 StringTie exon       | 112017025 | 112017167 | . | - | . | transcript_MSTRG.38284.lgene_id | MSTRG.38284; |
| 8 StringTie exon       | 112028082 | 112028184 | . | - | . | transcript_MSTRG.38284.lgene_id | MSTRG.38284; |
| 8 StringTie transcript | 112012697 | 112028184 | . | - | . | transcript_MSTRG.38284.lgene_id | MSTRG.38284; |
| 8 StringTie exon       | 112012697 | 112015021 | . | - | . | transcript_MSTRG.38284.lgene_id | MSTRG.38284; |
| 8 StringTie exon       | 112016463 | 112016639 | . | - | . | transcript_MSTRG.38284.lgene_id | MSTRG.38284; |
| 8 StringTie exon       | 112017025 | 112017167 | . | - | . | transcript_MSTRG.38284.lgene_id | MSTRG.38284; |
| 8 StringTie exon       | 112028082 | 112028184 | . | - | . | transcript_MSTRG.38284.lgene_id | MSTRG.38284; |
| 8 StringTie transcript | 112041648 | 112046081 | . | - | . | transcript_MSTRG.38255.lgene_id | MSTRG.38255; |
| 8 StringTie exon       | 112041648 | 112045404 | . | - | . | transcript_MSTRG.38255.lgene_id | MSTRG.38255; |
| 8 StringTie exon       | 112045451 | 112046081 | . | - | . | transcript_MSTRG.38255.lgene_id | MSTRG.38255; |
| 8 StringTie transcript | 112340092 | 112348098 | . | - | . | transcript_MSTRG.38289.lgene_id | MSTRG.38289; |
| 8 StringTie exon       | 112340092 | 112340282 | . | - | . | transcript_MSTRG.38289.lgene_id | MSTRG.38289; |
| 8 StringTie exon       | 112347958 | 112348098 | . | - | . | transcript_MSTRG.38289.lgene_id | MSTRG.38289; |
| 8 StringTie transcript | 118197144 | 118202771 | . | - | . | transcript_MSTRG.38416.lgene_id | MSTRG.38416; |
| 8 StringTie exon       | 118197144 | 118200840 | . | - | . | transcript_MSTRG.38416.lgene_id | MSTRG.38416; |
| 8 StringTie exon       | 118202631 | 118202771 | . | - | . | transcript_MSTRG.38416.lgene_id | MSTRG.38416; |
| 8 StringTie transcript | 119424800 | 119430821 | . | - | . | transcript_MSTRG.38428.lgene_id | MSTRG.38428; |
| 8 StringTie exon       | 119424800 | 119426794 | . | - | . | transcript_MSTRG.38428.lgene_id | MSTRG.38428; |
| 8 StringTie exon       | 119428353 | 119428493 | . | - | . | transcript_MSTRG.38428.lgene_id | MSTRG.38428; |
| 8 StringTie exon       | 119430798 | 119430821 | . | - | . | transcript_MSTRG.38428.lgene_id | MSTRG.38428; |
| 8 StringTie transcript | 120164418 | 120168150 | . | - | . | transcript_MSTRG.38433.lgene_id | MSTRG.38433; |
| 8 StringTie exon       | 120164418 | 120166188 | . | - | . | transcript_MSTRG.38433.lgene_id | MSTRG.38433; |

|                       |           |           |   |   |   |                         |          |              |
|-----------------------|-----------|-----------|---|---|---|-------------------------|----------|--------------|
| 8 StringTie exon      | 120168065 | 120168150 | . | - | . | transcript_MSTRG.38433. | lgene_id | MSTRG.38433; |
| 8 StringTie transcrip | 120164418 | 120309738 | . | - | . | transcript_MSTRG.38433. | lgene_id | MSTRG.38433; |
| 8 StringTie exon      | 120164418 | 120166188 | . | - | . | transcript_MSTRG.38433. | lgene_id | MSTRG.38433; |
| 8 StringTie exon      | 120167960 | 120168344 | . | - | . | transcript_MSTRG.38433. | lgene_id | MSTRG.38433; |
| 8 StringTie exon      | 120309686 | 120309738 | . | - | . | transcript_MSTRG.38433. | lgene_id | MSTRG.38433; |
| 8 StringTie transcrip | 120726925 | 120804505 | . | - | . | transcript_MSTRG.38441. | lgene_id | MSTRG.38441; |
| 8 StringTie exon      | 120726925 | 120726959 | . | - | . | transcript_MSTRG.38441. | lgene_id | MSTRG.38441; |
| 8 StringTie exon      | 120804031 | 120804505 | . | - | . | transcript_MSTRG.38441. | lgene_id | MSTRG.38441; |
| 8 StringTie transcrip | 127718904 | 127720410 | . | - | . | transcript_MSTRG.38494. | lgene_id | MSTRG.38494; |
| 8 StringTie exon      | 127718904 | 127719417 | . | - | . | transcript_MSTRG.38494. | lgene_id | MSTRG.38494; |
| 8 StringTie exon      | 127720358 | 127720410 | . | - | . | transcript_MSTRG.38494. | lgene_id | MSTRG.38494; |
| 8 StringTie transcrip | 129869521 | 129876414 | . | - | . | transcript_MSTRG.38593. | lgene_id | MSTRG.38593; |
| 8 StringTie exon      | 129869521 | 129872842 | . | - | . | transcript_MSTRG.38593. | lgene_id | MSTRG.38593; |
| 8 StringTie exon      | 129872958 | 129876414 | . | - | . | transcript_MSTRG.38593. | lgene_id | MSTRG.38593; |
| 8 StringTie transcrip | 130930522 | 130984484 | . | - | . | transcript_MSTRG.38632. | lgene_id | MSTRG.38632; |
| 8 StringTie exon      | 130930522 | 130930694 | . | - | . | transcript_MSTRG.38632. | lgene_id | MSTRG.38632; |
| 8 StringTie exon      | 130984070 | 130984484 | . | - | . | transcript_MSTRG.38632. | lgene_id | MSTRG.38632; |
| 8 StringTie transcrip | 130963128 | 131024073 | . | - | . | transcript_MSTRG.38634. | lgene_id | MSTRG.38634; |
| 8 StringTie exon      | 130963128 | 130963158 | . | - | . | transcript_MSTRG.38634. | lgene_id | MSTRG.38634; |
| 8 StringTie exon      | 131022193 | 131024073 | . | - | . | transcript_MSTRG.38634. | lgene_id | MSTRG.38634; |
| 8 StringTie transcrip | 132893965 | 132894666 | . | - | . | transcript_MSTRG.38678. | lgene_id | MSTRG.38678; |
| 8 StringTie exon      | 132893965 | 132894392 | . | - | . | transcript_MSTRG.38678. | lgene_id | MSTRG.38678; |
| 8 StringTie exon      | 132894429 | 132894666 | . | - | . | transcript_MSTRG.38678. | lgene_id | MSTRG.38678; |
| 9 StringTie transcrip | 212669    | 219634    | . | + | . | transcript_MSTRG.38796. | lgene_id | MSTRG.38796; |
| 9 StringTie exon      | 212669    | 212694    | . | + | . | transcript_MSTRG.38796. | lgene_id | MSTRG.38796; |
| 9 StringTie exon      | 219388    | 219634    | . | + | . | transcript_MSTRG.38796. | lgene_id | MSTRG.38796; |
| 9 StringTie transcrip | 3341637   | 3348481   | . | + | . | transcript_MSTRG.38876. | lgene_id | MSTRG.38876; |
| 9 StringTie exon      | 3341637   | 3341840   | . | + | . | transcript_MSTRG.38876. | lgene_id | MSTRG.38876; |
| 9 StringTie exon      | 3348324   | 3348481   | . | + | . | transcript_MSTRG.38876. | lgene_id | MSTRG.38876; |
| 9 StringTie transcrip | 3341657   | 3345086   | . | + | . | transcript_MSTRG.38876. | lgene_id | MSTRG.38876; |
| 9 StringTie exon      | 3341657   | 3341840   | . | + | . | transcript_MSTRG.38876. | lgene_id | MSTRG.38876; |
| 9 StringTie exon      | 3344404   | 3345086   | . | + | . | transcript_MSTRG.38876. | lgene_id | MSTRG.38876; |
| 9 StringTie transcrip | 6628148   | 6636320   | . | + | . | transcript_MSTRG.38938. | lgene_id | MSTRG.38938; |
| 9 StringTie exon      | 6628148   | 6628395   | . | + | . | transcript_MSTRG.38938. | lgene_id | MSTRG.38938; |
| 9 StringTie exon      | 6633757   | 6636320   | . | + | . | transcript_MSTRG.38938. | lgene_id | MSTRG.38938; |

|                       |         |           |   |   |                                 |              |
|-----------------------|---------|-----------|---|---|---------------------------------|--------------|
| 9 StringTie transcrip | 6629356 | 6634805 . | + | . | transcript_MSTRG.38938.¿gene_id | MSTRG.38938; |
| 9 StringTie exon      | 6629356 | 6629444 . | + | . | transcript_MSTRG.38938.¿gene_id | MSTRG.38938; |
| 9 StringTie exon      | 6633757 | 6634805 . | + | . | transcript_MSTRG.38938.¿gene_id | MSTRG.38938; |
| 9 StringTie transcrip | 7207299 | 7209795 . | + | . | transcript_MSTRG.38961.¿gene_id | MSTRG.38961; |
| 9 StringTie exon      | 7207299 | 7207471 . | + | . | transcript_MSTRG.38961.¿gene_id | MSTRG.38961; |
| 9 StringTie exon      | 7209766 | 7209795 . | + | . | transcript_MSTRG.38961.¿gene_id | MSTRG.38961; |
| 9 StringTie transcrip | 8391585 | 8403575 . | + | . | transcript_MSTRG.39006.¿gene_id | MSTRG.39006; |
| 9 StringTie exon      | 8391585 | 8391994 . | + | . | transcript_MSTRG.39006.¿gene_id | MSTRG.39006; |
| 9 StringTie exon      | 8393073 | 8393675 . | + | . | transcript_MSTRG.39006.¿gene_id | MSTRG.39006; |
| 9 StringTie exon      | 8395149 | 8395299 . | + | . | transcript_MSTRG.39006.¿gene_id | MSTRG.39006; |
| 9 StringTie exon      | 8395839 | 8396088 . | + | . | transcript_MSTRG.39006.¿gene_id | MSTRG.39006; |
| 9 StringTie exon      | 8396439 | 8396565 . | + | . | transcript_MSTRG.39006.¿gene_id | MSTRG.39006; |
| 9 StringTie exon      | 8397171 | 8398694 . | + | . | transcript_MSTRG.39006.¿gene_id | MSTRG.39006; |
| 9 StringTie exon      | 8399650 | 8399738 . | + | . | transcript_MSTRG.39006.¿gene_id | MSTRG.39006; |
| 9 StringTie exon      | 8400194 | 8400298 . | + | . | transcript_MSTRG.39006.¿gene_id | MSTRG.39006; |
| 9 StringTie exon      | 8400718 | 8400939 . | + | . | transcript_MSTRG.39006.¿gene_id | MSTRG.39006; |
| 9 StringTie exon      | 8402430 | 8403575 . | + | . | transcript_MSTRG.39006.¿gene_id | MSTRG.39006; |
| 9 StringTie transcrip | 8391713 | 8403183 . | + | . | transcript_MSTRG.39006.¿gene_id | MSTRG.39006; |
| 9 StringTie exon      | 8391713 | 8391994 . | + | . | transcript_MSTRG.39006.¿gene_id | MSTRG.39006; |
| 9 StringTie exon      | 8393073 | 8393675 . | + | . | transcript_MSTRG.39006.¿gene_id | MSTRG.39006; |
| 9 StringTie exon      | 8395149 | 8395299 . | + | . | transcript_MSTRG.39006.¿gene_id | MSTRG.39006; |
| 9 StringTie exon      | 8395839 | 8396088 . | + | . | transcript_MSTRG.39006.¿gene_id | MSTRG.39006; |
| 9 StringTie exon      | 8396439 | 8396565 . | + | . | transcript_MSTRG.39006.¿gene_id | MSTRG.39006; |
| 9 StringTie exon      | 8397171 | 8399738 . | + | . | transcript_MSTRG.39006.¿gene_id | MSTRG.39006; |
| 9 StringTie exon      | 8400194 | 8400298 . | + | . | transcript_MSTRG.39006.¿gene_id | MSTRG.39006; |
| 9 StringTie exon      | 8400718 | 8400939 . | + | . | transcript_MSTRG.39006.¿gene_id | MSTRG.39006; |
| 9 StringTie exon      | 8402430 | 8403183 . | + | . | transcript_MSTRG.39006.¿gene_id | MSTRG.39006; |
| 9 StringTie transcrip | 8391854 | 8403406 . | + | . | transcript_MSTRG.39006.¿gene_id | MSTRG.39006; |
| 9 StringTie exon      | 8391854 | 8391994 . | + | . | transcript_MSTRG.39006.¿gene_id | MSTRG.39006; |
| 9 StringTie exon      | 8393073 | 8393675 . | + | . | transcript_MSTRG.39006.¿gene_id | MSTRG.39006; |
| 9 StringTie exon      | 8395149 | 8395299 . | + | . | transcript_MSTRG.39006.¿gene_id | MSTRG.39006; |
| 9 StringTie exon      | 8396439 | 8400298 . | + | . | transcript_MSTRG.39006.¿gene_id | MSTRG.39006; |
| 9 StringTie exon      | 8400718 | 8400939 . | + | . | transcript_MSTRG.39006.¿gene_id | MSTRG.39006; |
| 9 StringTie exon      | 8402430 | 8403406 . | + | . | transcript_MSTRG.39006.¿gene_id | MSTRG.39006; |
| 9 StringTie transcrip | 8392670 | 8403575 . | + | . | transcript_MSTRG.39006.¿gene_id | MSTRG.39006; |

|                       |         |         |   |   |   |                                 |              |
|-----------------------|---------|---------|---|---|---|---------------------------------|--------------|
| 9 StringTie exon      | 8392670 | 8393675 | . | + | . | transcript_MSTRG.39006.4gene_id | MSTRG.39006; |
| 9 StringTie exon      | 8395839 | 8396088 | . | + | . | transcript_MSTRG.39006.4gene_id | MSTRG.39006; |
| 9 StringTie exon      | 8396439 | 8396565 | . | + | . | transcript_MSTRG.39006.4gene_id | MSTRG.39006; |
| 9 StringTie exon      | 8397171 | 8399738 | . | + | . | transcript_MSTRG.39006.4gene_id | MSTRG.39006; |
| 9 StringTie exon      | 8400194 | 8400298 | . | + | . | transcript_MSTRG.39006.4gene_id | MSTRG.39006; |
| 9 StringTie exon      | 8400718 | 8400939 | . | + | . | transcript_MSTRG.39006.4gene_id | MSTRG.39006; |
| 9 StringTie exon      | 8402430 | 8403575 | . | + | . | transcript_MSTRG.39006.4gene_id | MSTRG.39006; |
| 9 StringTie transcrip | 8396367 | 8403630 | . | + | . | transcript_MSTRG.39006.7gene_id | MSTRG.39006; |
| 9 StringTie exon      | 8396367 | 8398694 | . | + | . | transcript_MSTRG.39006.7gene_id | MSTRG.39006; |
| 9 StringTie exon      | 8399665 | 8399738 | . | + | . | transcript_MSTRG.39006.7gene_id | MSTRG.39006; |
| 9 StringTie exon      | 8400194 | 8400298 | . | + | . | transcript_MSTRG.39006.7gene_id | MSTRG.39006; |
| 9 StringTie exon      | 8400718 | 8400939 | . | + | . | transcript_MSTRG.39006.7gene_id | MSTRG.39006; |
| 9 StringTie exon      | 8402430 | 8403630 | . | + | . | transcript_MSTRG.39006.7gene_id | MSTRG.39006; |
| 9 StringTie transcrip | 8396367 | 8403677 | . | + | . | transcript_MSTRG.39006.6gene_id | MSTRG.39006; |
| 9 StringTie exon      | 8396367 | 8397251 | . | + | . | transcript_MSTRG.39006.6gene_id | MSTRG.39006; |
| 9 StringTie exon      | 8397749 | 8397989 | . | + | . | transcript_MSTRG.39006.6gene_id | MSTRG.39006; |
| 9 StringTie exon      | 8398532 | 8400298 | . | + | . | transcript_MSTRG.39006.6gene_id | MSTRG.39006; |
| 9 StringTie exon      | 8400718 | 8400939 | . | + | . | transcript_MSTRG.39006.6gene_id | MSTRG.39006; |
| 9 StringTie exon      | 8402430 | 8403677 | . | + | . | transcript_MSTRG.39006.6gene_id | MSTRG.39006; |
| 9 StringTie transcrip | 8396415 | 8403648 | . | + | . | transcript_MSTRG.39006.6gene_id | MSTRG.39006; |
| 9 StringTie exon      | 8396415 | 8396565 | . | + | . | transcript_MSTRG.39006.6gene_id | MSTRG.39006; |
| 9 StringTie exon      | 8402156 | 8402231 | . | + | . | transcript_MSTRG.39006.6gene_id | MSTRG.39006; |
| 9 StringTie exon      | 8402430 | 8403648 | . | + | . | transcript_MSTRG.39006.6gene_id | MSTRG.39006; |
| 9 StringTie transcrip | 8396459 | 8402974 | . | + | . | transcript_MSTRG.39006.1gene_id | MSTRG.39006; |
| 9 StringTie exon      | 8396459 | 8400298 | . | + | . | transcript_MSTRG.39006.1gene_id | MSTRG.39006; |
| 9 StringTie exon      | 8400718 | 8400939 | . | + | . | transcript_MSTRG.39006.1gene_id | MSTRG.39006; |
| 9 StringTie exon      | 8402156 | 8402231 | . | + | . | transcript_MSTRG.39006.1gene_id | MSTRG.39006; |
| 9 StringTie exon      | 8402430 | 8402974 | . | + | . | transcript_MSTRG.39006.1gene_id | MSTRG.39006; |
| 9 StringTie transcrip | 8397744 | 8411609 | . | + | . | transcript_MSTRG.39006.1gene_id | MSTRG.39006; |
| 9 StringTie exon      | 8397744 | 8398694 | . | + | . | transcript_MSTRG.39006.1gene_id | MSTRG.39006; |
| 9 StringTie exon      | 8410435 | 8411609 | . | + | . | transcript_MSTRG.39006.1gene_id | MSTRG.39006; |
| 9 StringTie transcrip | 8796015 | 8809119 | . | + | . | transcript_MSTRG.38997.1gene_id | MSTRG.38997; |
| 9 StringTie exon      | 8796015 | 8796145 | . | + | . | transcript_MSTRG.38997.1gene_id | MSTRG.38997; |
| 9 StringTie exon      | 8807690 | 8809119 | . | + | . | transcript_MSTRG.38997.1gene_id | MSTRG.38997; |
| 9 StringTie transcrip | 9779068 | 9780683 | . | + | . | transcript_MSTRG.39026.1gene_id | MSTRG.39026; |

|                        |          |          |   |   |   |                                 |              |
|------------------------|----------|----------|---|---|---|---------------------------------|--------------|
| 9 StringTie exon       | 9779068  | 9779528  | . | + | . | transcript_MSTRG.39026.lgene_id | MSTRG.39026; |
| 9 StringTie exon       | 9780043  | 9780683  | . | + | . | transcript_MSTRG.39026.lgene_id | MSTRG.39026; |
| 9 StringTie transcript | 9935588  | 9997293  | . | + | . | transcript_MSTRG.39039.lgene_id | MSTRG.39039; |
| 9 StringTie exon       | 9935588  | 9935750  | . | + | . | transcript_MSTRG.39039.lgene_id | MSTRG.39039; |
| 9 StringTie exon       | 9996636  | 9997293  | . | + | . | transcript_MSTRG.39039.lgene_id | MSTRG.39039; |
| 9 StringTie transcript | 10965765 | 10971371 | . | + | . | transcript_MSTRG.39076.lgene_id | MSTRG.39076; |
| 9 StringTie exon       | 10965765 | 10965964 | . | + | . | transcript_MSTRG.39076.lgene_id | MSTRG.39076; |
| 9 StringTie exon       | 10967857 | 10967952 | . | + | . | transcript_MSTRG.39076.lgene_id | MSTRG.39076; |
| 9 StringTie exon       | 10968089 | 10968170 | . | + | . | transcript_MSTRG.39076.lgene_id | MSTRG.39076; |
| 9 StringTie exon       | 10970864 | 10971371 | . | + | . | transcript_MSTRG.39076.lgene_id | MSTRG.39076; |
| 9 StringTie transcript | 10965765 | 10971371 | . | + | . | transcript_MSTRG.39076.lgene_id | MSTRG.39076; |
| 9 StringTie exon       | 10965765 | 10965890 | . | + | . | transcript_MSTRG.39076.lgene_id | MSTRG.39076; |
| 9 StringTie exon       | 10967857 | 10967952 | . | + | . | transcript_MSTRG.39076.lgene_id | MSTRG.39076; |
| 9 StringTie exon       | 10968089 | 10968170 | . | + | . | transcript_MSTRG.39076.lgene_id | MSTRG.39076; |
| 9 StringTie exon       | 10970864 | 10971371 | . | + | . | transcript_MSTRG.39076.lgene_id | MSTRG.39076; |
| 9 StringTie transcript | 10966061 | 10968552 | . | + | . | transcript_MSTRG.39076.lgene_id | MSTRG.39076; |
| 9 StringTie exon       | 10966061 | 10966657 | . | + | . | transcript_MSTRG.39076.lgene_id | MSTRG.39076; |
| 9 StringTie exon       | 10967857 | 10967952 | . | + | . | transcript_MSTRG.39076.lgene_id | MSTRG.39076; |
| 9 StringTie exon       | 10968089 | 10968170 | . | + | . | transcript_MSTRG.39076.lgene_id | MSTRG.39076; |
| 9 StringTie exon       | 10968276 | 10968552 | . | + | . | transcript_MSTRG.39076.lgene_id | MSTRG.39076; |
| 9 StringTie transcript | 10969724 | 10971371 | . | + | . | transcript_MSTRG.39076.lgene_id | MSTRG.39076; |
| 9 StringTie exon       | 10969724 | 10970621 | . | + | . | transcript_MSTRG.39076.lgene_id | MSTRG.39076; |
| 9 StringTie exon       | 10970650 | 10971371 | . | + | . | transcript_MSTRG.39076.lgene_id | MSTRG.39076; |
| 9 StringTie transcript | 10983184 | 10991311 | . | + | . | transcript_MSTRG.39076.lgene_id | MSTRG.39076; |
| 9 StringTie exon       | 10983184 | 10985142 | . | + | . | transcript_MSTRG.39076.lgene_id | MSTRG.39076; |
| 9 StringTie exon       | 10990926 | 10991311 | . | + | . | transcript_MSTRG.39076.lgene_id | MSTRG.39076; |
| 9 StringTie transcript | 20034427 | 20052525 | . | + | . | transcript_MSTRG.39253.lgene_id | MSTRG.39253; |
| 9 StringTie exon       | 20034427 | 20034641 | . | + | . | transcript_MSTRG.39253.lgene_id | MSTRG.39253; |
| 9 StringTie exon       | 20039480 | 20039574 | . | + | . | transcript_MSTRG.39253.lgene_id | MSTRG.39253; |
| 9 StringTie exon       | 20042362 | 20042472 | . | + | . | transcript_MSTRG.39253.lgene_id | MSTRG.39253; |
| 9 StringTie exon       | 20050168 | 20052525 | . | + | . | transcript_MSTRG.39253.lgene_id | MSTRG.39253; |
| 9 StringTie transcript | 20034431 | 20036510 | . | + | . | transcript_MSTRG.39253.lgene_id | MSTRG.39253; |
| 9 StringTie exon       | 20034431 | 20034641 | . | + | . | transcript_MSTRG.39253.lgene_id | MSTRG.39253; |
| 9 StringTie exon       | 20036261 | 20036510 | . | + | . | transcript_MSTRG.39253.lgene_id | MSTRG.39253; |
| 9 StringTie transcript | 21761696 | 21774950 | . | + | . | transcript_MSTRG.39292.lgene_id | MSTRG.39292; |



|                        |          |          |   |   |   |                                 |              |
|------------------------|----------|----------|---|---|---|---------------------------------|--------------|
| 9 StringTie exon       | 21761696 | 21761742 | . | + | . | transcript_MSTRG.39292.lgene_id | MSTRG.39292; |
| 9 StringTie exon       | 21772973 | 21773084 | . | + | . | transcript_MSTRG.39292.lgene_id | MSTRG.39292; |
| 9 StringTie exon       | 21774621 | 21774950 | . | + | . | transcript_MSTRG.39292.lgene_id | MSTRG.39292; |
| 9 StringTie transcript | 21815583 | 21843550 | . | + | . | transcript_MSTRG.39292.lgene_id | MSTRG.39292; |
| 9 StringTie exon       | 21815583 | 21816072 | . | + | . | transcript_MSTRG.39292.lgene_id | MSTRG.39292; |
| 9 StringTie exon       | 21832756 | 21832965 | . | + | . | transcript_MSTRG.39292.lgene_id | MSTRG.39292; |
| 9 StringTie exon       | 21837617 | 21837743 | . | + | . | transcript_MSTRG.39292.lgene_id | MSTRG.39292; |
| 9 StringTie exon       | 21843500 | 21843550 | . | + | . | transcript_MSTRG.39292.lgene_id | MSTRG.39292; |
| 9 StringTie transcript | 21921441 | 21953702 | . | + | . | transcript_MSTRG.39295.lgene_id | MSTRG.39295; |
| 9 StringTie exon       | 21921441 | 21921560 | . | + | . | transcript_MSTRG.39295.lgene_id | MSTRG.39295; |
| 9 StringTie exon       | 21926085 | 21926135 | . | + | . | transcript_MSTRG.39295.lgene_id | MSTRG.39295; |
| 9 StringTie exon       | 21942610 | 21942709 | . | + | . | transcript_MSTRG.39295.lgene_id | MSTRG.39295; |
| 9 StringTie exon       | 21952713 | 21953702 | . | + | . | transcript_MSTRG.39295.lgene_id | MSTRG.39295; |
| 9 StringTie transcript | 25763804 | 25776030 | . | + | . | transcript_MSTRG.39340.lgene_id | MSTRG.39340; |
| 9 StringTie exon       | 25763804 | 25763860 | . | + | . | transcript_MSTRG.39340.lgene_id | MSTRG.39340; |
| 9 StringTie exon       | 25775733 | 25776030 | . | + | . | transcript_MSTRG.39340.lgene_id | MSTRG.39340; |
| 9 StringTie transcript | 26986221 | 27004832 | . | + | . | transcript_MSTRG.39365.lgene_id | MSTRG.39365; |
| 9 StringTie exon       | 26986221 | 26986355 | . | + | . | transcript_MSTRG.39365.lgene_id | MSTRG.39365; |
| 9 StringTie exon       | 26993312 | 26993444 | . | + | . | transcript_MSTRG.39365.lgene_id | MSTRG.39365; |
| 9 StringTie exon       | 26996492 | 26996597 | . | + | . | transcript_MSTRG.39365.lgene_id | MSTRG.39365; |
| 9 StringTie exon       | 27004708 | 27004832 | . | + | . | transcript_MSTRG.39365.lgene_id | MSTRG.39365; |
| 9 StringTie transcript | 28251134 | 28254554 | . | + | . | transcript_MSTRG.39399.lgene_id | MSTRG.39399; |
| 9 StringTie exon       | 28251134 | 28251957 | . | + | . | transcript_MSTRG.39399.lgene_id | MSTRG.39399; |
| 9 StringTie exon       | 28254112 | 28254554 | . | + | . | transcript_MSTRG.39399.lgene_id | MSTRG.39399; |
| 9 StringTie transcript | 33061580 | 33061888 | . | + | . | transcript_MSTRG.39452.lgene_id | MSTRG.39452; |
| 9 StringTie exon       | 33061580 | 33061634 | . | + | . | transcript_MSTRG.39452.lgene_id | MSTRG.39452; |
| 9 StringTie exon       | 33061656 | 33061888 | . | + | . | transcript_MSTRG.39452.lgene_id | MSTRG.39452; |
| 9 StringTie transcript | 34511351 | 34549380 | . | + | . | transcript_MSTRG.39471.lgene_id | MSTRG.39471; |
| 9 StringTie exon       | 34511351 | 34511542 | . | + | . | transcript_MSTRG.39471.lgene_id | MSTRG.39471; |
| 9 StringTie exon       | 34547142 | 34549380 | . | + | . | transcript_MSTRG.39471.lgene_id | MSTRG.39471; |
| 9 StringTie transcript | 35856642 | 35872637 | . | + | . | transcript_MSTRG.39507.lgene_id | MSTRG.39507; |
| 9 StringTie exon       | 35856642 | 35856847 | . | + | . | transcript_MSTRG.39507.lgene_id | MSTRG.39507; |
| 9 StringTie exon       | 35858842 | 35858997 | . | + | . | transcript_MSTRG.39507.lgene_id | MSTRG.39507; |
| 9 StringTie exon       | 35872616 | 35872637 | . | + | . | transcript_MSTRG.39507.lgene_id | MSTRG.39507; |
| 9 StringTie transcript | 41997946 | 42027490 | . | + | . | transcript_MSTRG.39694.lgene_id | MSTRG.39694; |

|                       |          |            |   |   |                                 |              |
|-----------------------|----------|------------|---|---|---------------------------------|--------------|
| 9 StringTie exon      | 41997946 | 41999395 . | + | . | transcript_MSTRG.39694.lgene_id | MSTRG.39694; |
| 9 StringTie exon      | 42003950 | 42004004 . | + | . | transcript_MSTRG.39694.lgene_id | MSTRG.39694; |
| 9 StringTie exon      | 42004715 | 42004779 . | + | . | transcript_MSTRG.39694.lgene_id | MSTRG.39694; |
| 9 StringTie exon      | 42017972 | 42018171 . | + | . | transcript_MSTRG.39694.lgene_id | MSTRG.39694; |
| 9 StringTie exon      | 42021461 | 42021601 . | + | . | transcript_MSTRG.39694.lgene_id | MSTRG.39694; |
| 9 StringTie exon      | 42022788 | 42027490 . | + | . | transcript_MSTRG.39694.lgene_id | MSTRG.39694; |
| 9 StringTie transcrip | 42102948 | 42111713 . | + | . | transcript_MSTRG.39708.lgene_id | MSTRG.39708; |
| 9 StringTie exon      | 42102948 | 42103515 . | + | . | transcript_MSTRG.39708.lgene_id | MSTRG.39708; |
| 9 StringTie exon      | 42103970 | 42104504 . | + | . | transcript_MSTRG.39708.lgene_id | MSTRG.39708; |
| 9 StringTie exon      | 42108219 | 42108332 . | + | . | transcript_MSTRG.39708.lgene_id | MSTRG.39708; |
| 9 StringTie exon      | 42111652 | 42111713 . | + | . | transcript_MSTRG.39708.lgene_id | MSTRG.39708; |
| 9 StringTie transcrip | 42103433 | 42147425 . | + | . | transcript_MSTRG.39708.{gene_id | MSTRG.39708; |
| 9 StringTie exon      | 42103433 | 42103515 . | + | . | transcript_MSTRG.39708.{gene_id | MSTRG.39708; |
| 9 StringTie exon      | 42104279 | 42104504 . | + | . | transcript_MSTRG.39708.{gene_id | MSTRG.39708; |
| 9 StringTie exon      | 42108219 | 42108332 . | + | . | transcript_MSTRG.39708.{gene_id | MSTRG.39708; |
| 9 StringTie exon      | 42111564 | 42111734 . | + | . | transcript_MSTRG.39708.{gene_id | MSTRG.39708; |
| 9 StringTie exon      | 42144407 | 42144703 . | + | . | transcript_MSTRG.39708.{gene_id | MSTRG.39708; |
| 9 StringTie exon      | 42146520 | 42147425 . | + | . | transcript_MSTRG.39708.{gene_id | MSTRG.39708; |
| 9 StringTie transcrip | 42103464 | 42125309 . | + | . | transcript_MSTRG.39708.¿gene_id | MSTRG.39708; |
| 9 StringTie exon      | 42103464 | 42103515 . | + | . | transcript_MSTRG.39708.¿gene_id | MSTRG.39708; |
| 9 StringTie exon      | 42103970 | 42104504 . | + | . | transcript_MSTRG.39708.¿gene_id | MSTRG.39708; |
| 9 StringTie exon      | 42108219 | 42108332 . | + | . | transcript_MSTRG.39708.¿gene_id | MSTRG.39708; |
| 9 StringTie exon      | 42111564 | 42111734 . | + | . | transcript_MSTRG.39708.¿gene_id | MSTRG.39708; |
| 9 StringTie exon      | 42114015 | 42114189 . | + | . | transcript_MSTRG.39708.¿gene_id | MSTRG.39708; |
| 9 StringTie exon      | 42124297 | 42125309 . | + | . | transcript_MSTRG.39708.¿gene_id | MSTRG.39708; |
| 9 StringTie transcrip | 42103464 | 42151855 . | + | . | transcript_MSTRG.39708.{gene_id | MSTRG.39708; |
| 9 StringTie exon      | 42103464 | 42103515 . | + | . | transcript_MSTRG.39708.{gene_id | MSTRG.39708; |
| 9 StringTie exon      | 42103970 | 42104504 . | + | . | transcript_MSTRG.39708.{gene_id | MSTRG.39708; |
| 9 StringTie exon      | 42108219 | 42108332 . | + | . | transcript_MSTRG.39708.{gene_id | MSTRG.39708; |
| 9 StringTie exon      | 42111564 | 42111734 . | + | . | transcript_MSTRG.39708.{gene_id | MSTRG.39708; |
| 9 StringTie exon      | 42114015 | 42114189 . | + | . | transcript_MSTRG.39708.{gene_id | MSTRG.39708; |
| 9 StringTie exon      | 42149189 | 42149311 . | + | . | transcript_MSTRG.39708.{gene_id | MSTRG.39708; |
| 9 StringTie exon      | 42150770 | 42151855 . | + | . | transcript_MSTRG.39708.{gene_id | MSTRG.39708; |
| 9 StringTie transcrip | 42144848 | 42152121 . | + | . | transcript_MSTRG.39708.(gene_id | MSTRG.39708; |
| 9 StringTie exon      | 42144848 | 42144967 . | + | . | transcript_MSTRG.39708.(gene_id | MSTRG.39708; |

|                       |          |          |   |   |   |                                 |              |
|-----------------------|----------|----------|---|---|---|---------------------------------|--------------|
| 9 StringTie exon      | 42149189 | 42149311 | . | + | . | transcript_MSTRG.39708.(gene_id | MSTRG.39708; |
| 9 StringTie exon      | 42150770 | 42152121 | . | + | . | transcript_MSTRG.39708.(gene_id | MSTRG.39708; |
| 9 StringTie transcrip | 44150920 | 44151295 | . | + | . | transcript_MSTRG.39724.(gene_id | MSTRG.39724; |
| 9 StringTie exon      | 44150920 | 44151030 | . | + | . | transcript_MSTRG.39724.(gene_id | MSTRG.39724; |
| 9 StringTie exon      | 44151070 | 44151108 | . | + | . | transcript_MSTRG.39724.(gene_id | MSTRG.39724; |
| 9 StringTie exon      | 44151187 | 44151295 | . | + | . | transcript_MSTRG.39724.(gene_id | MSTRG.39724; |
| 9 StringTie transcrip | 44150920 | 44151315 | . | + | . | transcript_MSTRG.39724.lgene_id | MSTRG.39724; |
| 9 StringTie exon      | 44150920 | 44151030 | . | + | . | transcript_MSTRG.39724.lgene_id | MSTRG.39724; |
| 9 StringTie exon      | 44151070 | 44151315 | . | + | . | transcript_MSTRG.39724.lgene_id | MSTRG.39724; |
| 9 StringTie transcrip | 44151037 | 44151335 | . | + | . | transcript_MSTRG.39724.(gene_id | MSTRG.39724; |
| 9 StringTie exon      | 44151037 | 44151147 | . | + | . | transcript_MSTRG.39724.(gene_id | MSTRG.39724; |
| 9 StringTie exon      | 44151226 | 44151335 | . | + | . | transcript_MSTRG.39724.(gene_id | MSTRG.39724; |
| 9 StringTie transcrip | 46571839 | 46580000 | . | + | . | transcript_MSTRG.39810.lgene_id | MSTRG.39810; |
| 9 StringTie exon      | 46571839 | 46575016 | . | + | . | transcript_MSTRG.39810.lgene_id | MSTRG.39810; |
| 9 StringTie exon      | 46575339 | 46580000 | . | + | . | transcript_MSTRG.39810.lgene_id | MSTRG.39810; |
| 9 StringTie transcrip | 46891042 | 46898219 | . | + | . | transcript_MSTRG.39812.lgene_id | MSTRG.39812; |
| 9 StringTie exon      | 46891042 | 46891102 | . | + | . | transcript_MSTRG.39812.lgene_id | MSTRG.39812; |
| 9 StringTie exon      | 46895577 | 46895632 | . | + | . | transcript_MSTRG.39812.lgene_id | MSTRG.39812; |
| 9 StringTie exon      | 46896388 | 46896482 | . | + | . | transcript_MSTRG.39812.lgene_id | MSTRG.39812; |
| 9 StringTie exon      | 46898109 | 46898219 | . | + | . | transcript_MSTRG.39812.lgene_id | MSTRG.39812; |
| 9 StringTie transcrip | 52227162 | 52228973 | . | + | . | transcript_MSTRG.39938.lgene_id | MSTRG.39938; |
| 9 StringTie exon      | 52227162 | 52227337 | . | + | . | transcript_MSTRG.39938.lgene_id | MSTRG.39938; |
| 9 StringTie exon      | 52228597 | 52228973 | . | + | . | transcript_MSTRG.39938.lgene_id | MSTRG.39938; |
| 9 StringTie transcrip | 52227275 | 52231264 | . | + | . | transcript_MSTRG.39938.(gene_id | MSTRG.39938; |
| 9 StringTie exon      | 52227275 | 52227337 | . | + | . | transcript_MSTRG.39938.(gene_id | MSTRG.39938; |
| 9 StringTie exon      | 52230084 | 52231264 | . | + | . | transcript_MSTRG.39938.(gene_id | MSTRG.39938; |
| 9 StringTie transcrip | 55544321 | 55554590 | . | + | . | transcript_MSTRG.40002.lgene_id | MSTRG.40002; |
| 9 StringTie exon      | 55544321 | 55544443 | . | + | . | transcript_MSTRG.40002.lgene_id | MSTRG.40002; |
| 9 StringTie exon      | 55554336 | 55554590 | . | + | . | transcript_MSTRG.40002.lgene_id | MSTRG.40002; |
| 9 StringTie transcrip | 60830108 | 60834130 | . | + | . | transcript_MSTRG.40096.lgene_id | MSTRG.40096; |
| 9 StringTie exon      | 60830108 | 60831345 | . | + | . | transcript_MSTRG.40096.lgene_id | MSTRG.40096; |
| 9 StringTie exon      | 60831366 | 60834130 | . | + | . | transcript_MSTRG.40096.lgene_id | MSTRG.40096; |
| 9 StringTie transcrip | 67430506 | 67432529 | . | + | . | transcript_MSTRG.40175.lgene_id | MSTRG.40175; |
| 9 StringTie exon      | 67430506 | 67430662 | . | + | . | transcript_MSTRG.40175.lgene_id | MSTRG.40175; |
| 9 StringTie exon      | 67431198 | 67431350 | . | + | . | transcript_MSTRG.40175.lgene_id | MSTRG.40175; |

|                       |           |           |   |   |   |                                 |              |
|-----------------------|-----------|-----------|---|---|---|---------------------------------|--------------|
| 9 StringTie exon      | 67432464  | 67432529  | . | + | . | transcript_MSTRG.40175.lgene_id | MSTRG.40175; |
| 9 StringTie transcrip | 74963977  | 74990214  | . | + | . | transcript_MSTRG.40413.lgene_id | MSTRG.40413; |
| 9 StringTie exon      | 74963977  | 74964007  | . | + | . | transcript_MSTRG.40413.lgene_id | MSTRG.40413; |
| 9 StringTie exon      | 74989966  | 74990214  | . | + | . | transcript_MSTRG.40413.lgene_id | MSTRG.40413; |
| 9 StringTie transcrip | 74963986  | 75048843  | . | + | . | transcript_MSTRG.40413.lgene_id | MSTRG.40413; |
| 9 StringTie exon      | 74963986  | 74964007  | . | + | . | transcript_MSTRG.40413.lgene_id | MSTRG.40413; |
| 9 StringTie exon      | 75048412  | 75048843  | . | + | . | transcript_MSTRG.40413.lgene_id | MSTRG.40413; |
| 9 StringTie transcrip | 75017670  | 75048196  | . | + | . | transcript_MSTRG.40415.lgene_id | MSTRG.40415; |
| 9 StringTie exon      | 75017670  | 75017742  | . | + | . | transcript_MSTRG.40415.lgene_id | MSTRG.40415; |
| 9 StringTie exon      | 75046534  | 75048196  | . | + | . | transcript_MSTRG.40415.lgene_id | MSTRG.40415; |
| 9 StringTie transcrip | 75677287  | 75679659  | . | + | . | transcript_MSTRG.40446.lgene_id | MSTRG.40446; |
| 9 StringTie exon      | 75677287  | 75679110  | . | + | . | transcript_MSTRG.40446.lgene_id | MSTRG.40446; |
| 9 StringTie exon      | 75679179  | 75679659  | . | + | . | transcript_MSTRG.40446.lgene_id | MSTRG.40446; |
| 9 StringTie transcrip | 78387579  | 78388539  | . | + | . | transcript_MSTRG.40520.lgene_id | MSTRG.40520; |
| 9 StringTie exon      | 78387579  | 78388200  | . | + | . | transcript_MSTRG.40520.lgene_id | MSTRG.40520; |
| 9 StringTie exon      | 78388487  | 78388539  | . | + | . | transcript_MSTRG.40520.lgene_id | MSTRG.40520; |
| 9 StringTie transcrip | 84239887  | 84248653  | . | + | . | transcript_MSTRG.40562.lgene_id | MSTRG.40562; |
| 9 StringTie exon      | 84239887  | 84240196  | . | + | . | transcript_MSTRG.40562.lgene_id | MSTRG.40562; |
| 9 StringTie exon      | 84247109  | 84247167  | . | + | . | transcript_MSTRG.40562.lgene_id | MSTRG.40562; |
| 9 StringTie exon      | 84248341  | 84248653  | . | + | . | transcript_MSTRG.40562.lgene_id | MSTRG.40562; |
| 9 StringTie transcrip | 85732984  | 85733507  | . | + | . | transcript_MSTRG.40592.lgene_id | MSTRG.40592; |
| 9 StringTie exon      | 85732984  | 85733132  | . | + | . | transcript_MSTRG.40592.lgene_id | MSTRG.40592; |
| 9 StringTie exon      | 85733434  | 85733507  | . | + | . | transcript_MSTRG.40592.lgene_id | MSTRG.40592; |
| 9 StringTie transcrip | 87164452  | 87201015  | . | + | . | transcript_MSTRG.40614.lgene_id | MSTRG.40614; |
| 9 StringTie exon      | 87164452  | 87164583  | . | + | . | transcript_MSTRG.40614.lgene_id | MSTRG.40614; |
| 9 StringTie exon      | 87179427  | 87179631  | . | + | . | transcript_MSTRG.40614.lgene_id | MSTRG.40614; |
| 9 StringTie exon      | 87200902  | 87201015  | . | + | . | transcript_MSTRG.40614.lgene_id | MSTRG.40614; |
| 9 StringTie transcrip | 91667533  | 91741969  | . | + | . | transcript_MSTRG.40694.lgene_id | MSTRG.40694; |
| 9 StringTie exon      | 91667533  | 91667557  | . | + | . | transcript_MSTRG.40694.lgene_id | MSTRG.40694; |
| 9 StringTie exon      | 91740638  | 91741969  | . | + | . | transcript_MSTRG.40694.lgene_id | MSTRG.40694; |
| 9 StringTie transcrip | 100281890 | 100283453 | . | + | . | transcript_MSTRG.40817.lgene_id | MSTRG.40817; |
| 9 StringTie exon      | 100281890 | 100281974 | . | + | . | transcript_MSTRG.40817.lgene_id | MSTRG.40817; |
| 9 StringTie exon      | 100282524 | 100283453 | . | + | . | transcript_MSTRG.40817.lgene_id | MSTRG.40817; |
| 9 StringTie transcrip | 102534657 | 102589246 | . | + | . | transcript_MSTRG.40937.lgene_id | MSTRG.40937; |
| 9 StringTie exon      | 102534657 | 102534761 | . | + | . | transcript_MSTRG.40937.lgene_id | MSTRG.40937; |

|                       |           |           |   |   |   |                                 |              |
|-----------------------|-----------|-----------|---|---|---|---------------------------------|--------------|
| 9 StringTie exon      | 102588372 | 102589246 | . | + | . | transcript_MSTRG.40937.lgene_id | MSTRG.40937; |
| 9 StringTie transcrip | 105733491 | 105777344 | . | + | . | transcript_MSTRG.40999.lgene_id | MSTRG.40999; |
| 9 StringTie exon      | 105733491 | 105733934 | . | + | . | transcript_MSTRG.40999.lgene_id | MSTRG.40999; |
| 9 StringTie exon      | 105774732 | 105777344 | . | + | . | transcript_MSTRG.40999.lgene_id | MSTRG.40999; |
| 9 StringTie transcrip | 108686588 | 108715479 | . | + | . | transcript_MSTRG.41059.lgene_id | MSTRG.41059; |
| 9 StringTie exon      | 108686588 | 108686669 | . | + | . | transcript_MSTRG.41059.lgene_id | MSTRG.41059; |
| 9 StringTie exon      | 108715320 | 108715479 | . | + | . | transcript_MSTRG.41059.lgene_id | MSTRG.41059; |
| 9 StringTie transcrip | 113719580 | 113720352 | . | + | . | transcript_MSTRG.41092.lgene_id | MSTRG.41092; |
| 9 StringTie exon      | 113719580 | 113719812 | . | + | . | transcript_MSTRG.41092.lgene_id | MSTRG.41092; |
| 9 StringTie exon      | 113720220 | 113720352 | . | + | . | transcript_MSTRG.41092.lgene_id | MSTRG.41092; |
| 9 StringTie transcrip | 116488246 | 116489566 | . | + | . | transcript_MSTRG.41204.lgene_id | MSTRG.41204; |
| 9 StringTie exon      | 116488246 | 116488334 | . | + | . | transcript_MSTRG.41204.lgene_id | MSTRG.41204; |
| 9 StringTie exon      | 116489380 | 116489566 | . | + | . | transcript_MSTRG.41204.lgene_id | MSTRG.41204; |
| 9 StringTie transcrip | 124514198 | 124517263 | . | + | . | transcript_MSTRG.41374.lgene_id | MSTRG.41374; |
| 9 StringTie exon      | 124514198 | 124514256 | . | + | . | transcript_MSTRG.41374.lgene_id | MSTRG.41374; |
| 9 StringTie exon      | 124514625 | 124514758 | . | + | . | transcript_MSTRG.41374.lgene_id | MSTRG.41374; |
| 9 StringTie exon      | 124516511 | 124517263 | . | + | . | transcript_MSTRG.41374.lgene_id | MSTRG.41374; |
| 9 StringTie transcrip | 125338882 | 125344013 | . | + | . | transcript_MSTRG.41361.lgene_id | MSTRG.41361; |
| 9 StringTie exon      | 125338882 | 125338950 | . | + | . | transcript_MSTRG.41361.lgene_id | MSTRG.41361; |
| 9 StringTie exon      | 125343150 | 125343352 | . | + | . | transcript_MSTRG.41361.lgene_id | MSTRG.41361; |
| 9 StringTie exon      | 125343854 | 125344013 | . | + | . | transcript_MSTRG.41361.lgene_id | MSTRG.41361; |
| 9 StringTie transcrip | 126286011 | 126316440 | . | + | . | transcript_MSTRG.41393.lgene_id | MSTRG.41393; |
| 9 StringTie exon      | 126286011 | 126288248 | . | + | . | transcript_MSTRG.41393.lgene_id | MSTRG.41393; |
| 9 StringTie exon      | 126315814 | 126316440 | . | + | . | transcript_MSTRG.41393.lgene_id | MSTRG.41393; |
| 9 StringTie transcrip | 127830724 | 127846078 | . | + | . | transcript_MSTRG.41411.lgene_id | MSTRG.41411; |
| 9 StringTie exon      | 127830724 | 127830938 | . | + | . | transcript_MSTRG.41411.lgene_id | MSTRG.41411; |
| 9 StringTie exon      | 127846015 | 127846078 | . | + | . | transcript_MSTRG.41411.lgene_id | MSTRG.41411; |
| 9 StringTie transcrip | 129041180 | 129042410 | . | + | . | transcript_MSTRG.41447.lgene_id | MSTRG.41447; |
| 9 StringTie exon      | 129041180 | 129041598 | . | + | . | transcript_MSTRG.41447.lgene_id | MSTRG.41447; |
| 9 StringTie exon      | 129042370 | 129042410 | . | + | . | transcript_MSTRG.41447.lgene_id | MSTRG.41447; |
| 9 StringTie transcrip | 131074709 | 131126387 | . | + | . | transcript_MSTRG.41496.lgene_id | MSTRG.41496; |
| 9 StringTie exon      | 131074709 | 131075157 | . | + | . | transcript_MSTRG.41496.lgene_id | MSTRG.41496; |
| 9 StringTie exon      | 131124494 | 131124755 | . | + | . | transcript_MSTRG.41496.lgene_id | MSTRG.41496; |
| 9 StringTie exon      | 131125209 | 131126387 | . | + | . | transcript_MSTRG.41496.lgene_id | MSTRG.41496; |
| 9 StringTie transcrip | 131110505 | 131124788 | . | + | . | transcript_MSTRG.41496.lgene_id | MSTRG.41496; |

|                        |           |           |   |   |   |                                 |              |
|------------------------|-----------|-----------|---|---|---|---------------------------------|--------------|
| 9 StringTie exon       | 131110505 | 131110732 | . | + | . | transcript_MSTRG.41496.¿gene_id | MSTRG.41496; |
| 9 StringTie exon       | 131124494 | 131124788 | . | + | . | transcript_MSTRG.41496.¿gene_id | MSTRG.41496; |
| 9 StringTie transcript | 131891310 | 131903296 | . | + | . | transcript_MSTRG.41519.¿gene_id | MSTRG.41519; |
| 9 StringTie exon       | 131891310 | 131891746 | . | + | . | transcript_MSTRG.41519.¿gene_id | MSTRG.41519; |
| 9 StringTie exon       | 131892075 | 131892248 | . | + | . | transcript_MSTRG.41519.¿gene_id | MSTRG.41519; |
| 9 StringTie exon       | 131894097 | 131894252 | . | + | . | transcript_MSTRG.41519.¿gene_id | MSTRG.41519; |
| 9 StringTie exon       | 131900186 | 131903296 | . | + | . | transcript_MSTRG.41519.¿gene_id | MSTRG.41519; |
| 9 StringTie transcript | 131891317 | 131903989 | . | + | . | transcript_MSTRG.41519.¿gene_id | MSTRG.41519; |
| 9 StringTie exon       | 131891317 | 131892248 | . | + | . | transcript_MSTRG.41519.¿gene_id | MSTRG.41519; |
| 9 StringTie exon       | 131894097 | 131894252 | . | + | . | transcript_MSTRG.41519.¿gene_id | MSTRG.41519; |
| 9 StringTie exon       | 131900186 | 131902031 | . | + | . | transcript_MSTRG.41519.¿gene_id | MSTRG.41519; |
| 9 StringTie exon       | 131903894 | 131903989 | . | + | . | transcript_MSTRG.41519.¿gene_id | MSTRG.41519; |
| 9 StringTie transcript | 131891361 | 131902938 | . | + | . | transcript_MSTRG.41519.¿gene_id | MSTRG.41519; |
| 9 StringTie exon       | 131891361 | 131891509 | . | + | . | transcript_MSTRG.41519.¿gene_id | MSTRG.41519; |
| 9 StringTie exon       | 131892075 | 131892248 | . | + | . | transcript_MSTRG.41519.¿gene_id | MSTRG.41519; |
| 9 StringTie exon       | 131894097 | 131894252 | . | + | . | transcript_MSTRG.41519.¿gene_id | MSTRG.41519; |
| 9 StringTie exon       | 131900186 | 131902938 | . | + | . | transcript_MSTRG.41519.¿gene_id | MSTRG.41519; |
| 9 StringTie transcript | 131892105 | 131895861 | . | + | . | transcript_MSTRG.41519.¿gene_id | MSTRG.41519; |
| 9 StringTie exon       | 131892105 | 131892248 | . | + | . | transcript_MSTRG.41519.¿gene_id | MSTRG.41519; |
| 9 StringTie exon       | 131894097 | 131894252 | . | + | . | transcript_MSTRG.41519.¿gene_id | MSTRG.41519; |
| 9 StringTie exon       | 131895763 | 131895861 | . | + | . | transcript_MSTRG.41519.¿gene_id | MSTRG.41519; |
| 9 StringTie transcript | 139169935 | 139186605 | . | + | . | transcript_MSTRG.41591.¿gene_id | MSTRG.41591; |
| 9 StringTie exon       | 139169935 | 139170244 | . | + | . | transcript_MSTRG.41591.¿gene_id | MSTRG.41591; |
| 9 StringTie exon       | 139185907 | 139186605 | . | + | . | transcript_MSTRG.41591.¿gene_id | MSTRG.41591; |
| 9 StringTie transcript | 2876972   | 3063801   | . | - | . | transcript_MSTRG.38842.¿gene_id | MSTRG.38842; |
| 9 StringTie exon       | 2876972   | 2877078   | . | - | . | transcript_MSTRG.38842.¿gene_id | MSTRG.38842; |
| 9 StringTie exon       | 2974784   | 2974814   | . | - | . | transcript_MSTRG.38842.¿gene_id | MSTRG.38842; |
| 9 StringTie exon       | 3063705   | 3063801   | . | - | . | transcript_MSTRG.38842.¿gene_id | MSTRG.38842; |
| 9 StringTie transcript | 3339665   | 3340833   | . | - | . | transcript_MSTRG.38879.¿gene_id | MSTRG.38879; |
| 9 StringTie exon       | 3339665   | 3340164   | . | - | . | transcript_MSTRG.38879.¿gene_id | MSTRG.38879; |
| 9 StringTie exon       | 3340722   | 3340833   | . | - | . | transcript_MSTRG.38879.¿gene_id | MSTRG.38879; |
| 9 StringTie transcript | 3803701   | 3805933   | . | - | . | transcript_MSTRG.38889.¿gene_id | MSTRG.38889; |
| 9 StringTie exon       | 3803701   | 3803784   | . | - | . | transcript_MSTRG.38889.¿gene_id | MSTRG.38889; |
| 9 StringTie exon       | 3805010   | 3805933   | . | - | . | transcript_MSTRG.38889.¿gene_id | MSTRG.38889; |
| 9 StringTie transcript | 9932852   | 9935798   | . | - | . | transcript_MSTRG.39037.¿gene_id | MSTRG.39037; |

|                        |          |            |     |                                 |              |
|------------------------|----------|------------|-----|---------------------------------|--------------|
| 9 StringTie exon       | 9932852  | 9933061 .  | - . | transcript_MSTRG.39037.lgene_id | MSTRG.39037; |
| 9 StringTie exon       | 9935641  | 9935798 .  | - . | transcript_MSTRG.39037.lgene_id | MSTRG.39037; |
| 9 StringTie transcript | 9934250  | 9990161 .  | - . | transcript_MSTRG.39038.lgene_id | MSTRG.39038; |
| 9 StringTie exon       | 9934250  | 9934295 .  | - . | transcript_MSTRG.39038.lgene_id | MSTRG.39038; |
| 9 StringTie exon       | 9989824  | 9990161 .  | - . | transcript_MSTRG.39038.lgene_id | MSTRG.39038; |
| 9 StringTie transcript | 9935975  | 10003157 . | - . | transcript_MSTRG.39040.lgene_id | MSTRG.39040; |
| 9 StringTie exon       | 9935975  | 9936451 .  | - . | transcript_MSTRG.39040.lgene_id | MSTRG.39040; |
| 9 StringTie exon       | 9997870  | 9998050 .  | - . | transcript_MSTRG.39040.lgene_id | MSTRG.39040; |
| 9 StringTie exon       | 10003058 | 10003157 . | - . | transcript_MSTRG.39040.lgene_id | MSTRG.39040; |
| 9 StringTie transcript | 9935975  | 10013550 . | - . | transcript_MSTRG.39040.lgene_id | MSTRG.39040; |
| 9 StringTie exon       | 9935975  | 9936466 .  | - . | transcript_MSTRG.39040.lgene_id | MSTRG.39040; |
| 9 StringTie exon       | 9997870  | 9998050 .  | - . | transcript_MSTRG.39040.lgene_id | MSTRG.39040; |
| 9 StringTie exon       | 10003058 | 10003175 . | - . | transcript_MSTRG.39040.lgene_id | MSTRG.39040; |
| 9 StringTie exon       | 10013470 | 10013550 . | - . | transcript_MSTRG.39040.lgene_id | MSTRG.39040; |
| 9 StringTie transcript | 9949537  | 9950589 .  | - . | transcript_MSTRG.39040.lgene_id | MSTRG.39040; |
| 9 StringTie exon       | 9949537  | 9949687 .  | - . | transcript_MSTRG.39040.lgene_id | MSTRG.39040; |
| 9 StringTie exon       | 9950447  | 9950589 .  | - . | transcript_MSTRG.39040.lgene_id | MSTRG.39040; |
| 9 StringTie transcript | 9949540  | 9950591 .  | - . | transcript_MSTRG.39040.lgene_id | MSTRG.39040; |
| 9 StringTie exon       | 9949540  | 9949687 .  | - . | transcript_MSTRG.39040.lgene_id | MSTRG.39040; |
| 9 StringTie exon       | 9950125  | 9950591 .  | - . | transcript_MSTRG.39040.lgene_id | MSTRG.39040; |
| 9 StringTie transcript | 9949548  | 10013547 . | - . | transcript_MSTRG.39040.lgene_id | MSTRG.39040; |
| 9 StringTie exon       | 9949548  | 9949687 .  | - . | transcript_MSTRG.39040.lgene_id | MSTRG.39040; |
| 9 StringTie exon       | 9949767  | 9950588 .  | - . | transcript_MSTRG.39040.lgene_id | MSTRG.39040; |
| 9 StringTie exon       | 10009519 | 10009740 . | - . | transcript_MSTRG.39040.lgene_id | MSTRG.39040; |
| 9 StringTie exon       | 10013093 | 10013547 . | - . | transcript_MSTRG.39040.lgene_id | MSTRG.39040; |
| 9 StringTie transcript | 9949555  | 9950591 .  | - . | transcript_MSTRG.39040.lgene_id | MSTRG.39040; |
| 9 StringTie exon       | 9949555  | 9949687 .  | - . | transcript_MSTRG.39040.lgene_id | MSTRG.39040; |
| 9 StringTie exon       | 9950125  | 9950221 .  | - . | transcript_MSTRG.39040.lgene_id | MSTRG.39040; |
| 9 StringTie exon       | 9950447  | 9950591 .  | - . | transcript_MSTRG.39040.lgene_id | MSTRG.39040; |
| 9 StringTie transcript | 9997356  | 10003157 . | - . | transcript_MSTRG.39040.lgene_id | MSTRG.39040; |
| 9 StringTie exon       | 9997356  | 9997483 .  | - . | transcript_MSTRG.39040.lgene_id | MSTRG.39040; |
| 9 StringTie exon       | 9997870  | 9998050 .  | - . | transcript_MSTRG.39040.lgene_id | MSTRG.39040; |
| 9 StringTie exon       | 10003058 | 10003157 . | - . | transcript_MSTRG.39040.lgene_id | MSTRG.39040; |
| 9 StringTie transcript | 10007082 | 10013547 . | - . | transcript_MSTRG.39040.lgene_id | MSTRG.39040; |
| 9 StringTie exon       | 10007082 | 10008197 . | - . | transcript_MSTRG.39040.lgene_id | MSTRG.39040; |

|                        |          |          |   |   |   |                                 |              |
|------------------------|----------|----------|---|---|---|---------------------------------|--------------|
| 9 StringTie exon       | 10009519 | 10009740 | . | - | . | transcript_MSTRG.39040.¿gene_id | MSTRG.39040; |
| 9 StringTie exon       | 10013470 | 10013547 | . | - | . | transcript_MSTRG.39040.¿gene_id | MSTRG.39040; |
| 9 StringTie transcript | 10007084 | 10013550 | . | - | . | transcript_MSTRG.39040.lgene_id | MSTRG.39040; |
| 9 StringTie exon       | 10007084 | 10007295 | . | - | . | transcript_MSTRG.39040.lgene_id | MSTRG.39040; |
| 9 StringTie exon       | 10007734 | 10008197 | . | - | . | transcript_MSTRG.39040.lgene_id | MSTRG.39040; |
| 9 StringTie exon       | 10013470 | 10013550 | . | - | . | transcript_MSTRG.39040.lgene_id | MSTRG.39040; |
| 9 StringTie transcript | 10007084 | 10013569 | . | - | . | transcript_MSTRG.39040.lgene_id | MSTRG.39040; |
| 9 StringTie exon       | 10007084 | 10007295 | . | - | . | transcript_MSTRG.39040.lgene_id | MSTRG.39040; |
| 9 StringTie exon       | 10007734 | 10008197 | . | - | . | transcript_MSTRG.39040.lgene_id | MSTRG.39040; |
| 9 StringTie exon       | 10009519 | 10009740 | . | - | . | transcript_MSTRG.39040.lgene_id | MSTRG.39040; |
| 9 StringTie exon       | 10011020 | 10011087 | . | - | . | transcript_MSTRG.39040.lgene_id | MSTRG.39040; |
| 9 StringTie exon       | 10013470 | 10013569 | . | - | . | transcript_MSTRG.39040.lgene_id | MSTRG.39040; |
| 9 StringTie transcript | 11145542 | 11172785 | . | - | . | transcript_MSTRG.39081.lgene_id | MSTRG.39081; |
| 9 StringTie exon       | 11145542 | 11146918 | . | - | . | transcript_MSTRG.39081.lgene_id | MSTRG.39081; |
| 9 StringTie exon       | 11171741 | 11172785 | . | - | . | transcript_MSTRG.39081.lgene_id | MSTRG.39081; |
| 9 StringTie transcript | 12652827 | 12656714 | . | - | . | transcript_MSTRG.39119.lgene_id | MSTRG.39119; |
| 9 StringTie exon       | 12652827 | 12652905 | . | - | . | transcript_MSTRG.39119.lgene_id | MSTRG.39119; |
| 9 StringTie exon       | 12656063 | 12656714 | . | - | . | transcript_MSTRG.39119.lgene_id | MSTRG.39119; |
| 9 StringTie transcript | 20650795 | 20704693 | . | - | . | transcript_MSTRG.39262.lgene_id | MSTRG.39262; |
| 9 StringTie exon       | 20650795 | 20650820 | . | - | . | transcript_MSTRG.39262.lgene_id | MSTRG.39262; |
| 9 StringTie exon       | 20702051 | 20704693 | . | - | . | transcript_MSTRG.39262.lgene_id | MSTRG.39262; |
| 9 StringTie transcript | 20931767 | 20933450 | . | - | . | transcript_MSTRG.39283.lgene_id | MSTRG.39283; |
| 9 StringTie exon       | 20931767 | 20932882 | . | - | . | transcript_MSTRG.39283.lgene_id | MSTRG.39283; |
| 9 StringTie exon       | 20933165 | 20933450 | . | - | . | transcript_MSTRG.39283.lgene_id | MSTRG.39283; |
| 9 StringTie transcript | 21023789 | 21029111 | . | - | . | transcript_MSTRG.39284.¿gene_id | MSTRG.39284; |
| 9 StringTie exon       | 21023789 | 21029111 | . | - | . | transcript_MSTRG.39284.¿gene_id | MSTRG.39284; |
| 9 StringTie transcript | 26882129 | 26976504 | . | - | . | transcript_MSTRG.39379.lgene_id | MSTRG.39379; |
| 9 StringTie exon       | 26882129 | 26882321 | . | - | . | transcript_MSTRG.39379.lgene_id | MSTRG.39379; |
| 9 StringTie exon       | 26976404 | 26976504 | . | - | . | transcript_MSTRG.39379.lgene_id | MSTRG.39379; |
| 9 StringTie transcript | 27118484 | 27122137 | . | - | . | transcript_MSTRG.39371.lgene_id | MSTRG.39371; |
| 9 StringTie exon       | 27118484 | 27118705 | . | - | . | transcript_MSTRG.39371.lgene_id | MSTRG.39371; |
| 9 StringTie exon       | 27122073 | 27122137 | . | - | . | transcript_MSTRG.39371.lgene_id | MSTRG.39371; |
| 9 StringTie transcript | 35782501 | 35786587 | . | - | . | transcript_MSTRG.39498.lgene_id | MSTRG.39498; |
| 9 StringTie exon       | 35782501 | 35782862 | . | - | . | transcript_MSTRG.39498.lgene_id | MSTRG.39498; |
| 9 StringTie exon       | 35786500 | 35786587 | . | - | . | transcript_MSTRG.39498.lgene_id | MSTRG.39498; |



|                       |          |            |     |                                 |              |
|-----------------------|----------|------------|-----|---------------------------------|--------------|
| 9 StringTie transcrip | 36849672 | 36855068 . | - . | transcript_MSTRG.39550.lgene_id | MSTRG.39550; |
| 9 StringTie exon      | 36849672 | 36849965 . | - . | transcript_MSTRG.39550.lgene_id | MSTRG.39550; |
| 9 StringTie exon      | 36854910 | 36855068 . | - . | transcript_MSTRG.39550.lgene_id | MSTRG.39550; |
| 9 StringTie transcrip | 38315783 | 38318611 . | - . | transcript_MSTRG.39578.lgene_id | MSTRG.39578; |
| 9 StringTie exon      | 38315783 | 38316211 . | - . | transcript_MSTRG.39578.lgene_id | MSTRG.39578; |
| 9 StringTie exon      | 38316587 | 38316778 . | - . | transcript_MSTRG.39578.lgene_id | MSTRG.39578; |
| 9 StringTie exon      | 38318461 | 38318611 . | - . | transcript_MSTRG.39578.lgene_id | MSTRG.39578; |
| 9 StringTie transcrip | 39457004 | 39464386 . | - . | transcript_MSTRG.39628.lgene_id | MSTRG.39628; |
| 9 StringTie exon      | 39457004 | 39457030 . | - . | transcript_MSTRG.39628.lgene_id | MSTRG.39628; |
| 9 StringTie exon      | 39463709 | 39464386 . | - . | transcript_MSTRG.39628.lgene_id | MSTRG.39628; |
| 9 StringTie transcrip | 39543616 | 39545797 . | - . | transcript_MSTRG.39629.lgene_id | MSTRG.39629; |
| 9 StringTie exon      | 39543616 | 39543648 . | - . | transcript_MSTRG.39629.lgene_id | MSTRG.39629; |
| 9 StringTie exon      | 39545483 | 39545797 . | - . | transcript_MSTRG.39629.lgene_id | MSTRG.39629; |
| 9 StringTie transcrip | 41625084 | 41639431 . | - . | transcript_MSTRG.39669.lgene_id | MSTRG.39669; |
| 9 StringTie exon      | 41625084 | 41626120 . | - . | transcript_MSTRG.39669.lgene_id | MSTRG.39669; |
| 9 StringTie exon      | 41632309 | 41632589 . | - . | transcript_MSTRG.39669.lgene_id | MSTRG.39669; |
| 9 StringTie exon      | 41636157 | 41636225 . | - . | transcript_MSTRG.39669.lgene_id | MSTRG.39669; |
| 9 StringTie exon      | 41639292 | 41639431 . | - . | transcript_MSTRG.39669.lgene_id | MSTRG.39669; |
| 9 StringTie transcrip | 41631442 | 41636212 . | - . | transcript_MSTRG.39669.lgene_id | MSTRG.39669; |
| 9 StringTie exon      | 41631442 | 41631559 . | - . | transcript_MSTRG.39669.lgene_id | MSTRG.39669; |
| 9 StringTie exon      | 41632309 | 41632589 . | - . | transcript_MSTRG.39669.lgene_id | MSTRG.39669; |
| 9 StringTie exon      | 41636157 | 41636212 . | - . | transcript_MSTRG.39669.lgene_id | MSTRG.39669; |
| 9 StringTie transcrip | 41632307 | 41638798 . | - . | transcript_MSTRG.39669.lgene_id | MSTRG.39669; |
| 9 StringTie exon      | 41632307 | 41633336 . | - . | transcript_MSTRG.39669.lgene_id | MSTRG.39669; |
| 9 StringTie exon      | 41636157 | 41636225 . | - . | transcript_MSTRG.39669.lgene_id | MSTRG.39669; |
| 9 StringTie exon      | 41638166 | 41638798 . | - . | transcript_MSTRG.39669.lgene_id | MSTRG.39669; |
| 9 StringTie transcrip | 41681800 | 41686100 . | - . | transcript_MSTRG.39671.lgene_id | MSTRG.39671; |
| 9 StringTie exon      | 41681800 | 41682328 . | - . | transcript_MSTRG.39671.lgene_id | MSTRG.39671; |
| 9 StringTie exon      | 41685726 | 41686100 . | - . | transcript_MSTRG.39671.lgene_id | MSTRG.39671; |
| 9 StringTie transcrip | 41807649 | 41839511 . | - . | transcript_MSTRG.39672.lgene_id | MSTRG.39672; |
| 9 StringTie exon      | 41807649 | 41811027 . | - . | transcript_MSTRG.39672.lgene_id | MSTRG.39672; |
| 9 StringTie exon      | 41837740 | 41839511 . | - . | transcript_MSTRG.39672.lgene_id | MSTRG.39672; |
| 9 StringTie transcrip | 42137524 | 42141853 . | - . | transcript_MSTRG.39710.lgene_id | MSTRG.39710; |
| 9 StringTie exon      | 42137524 | 42137581 . | - . | transcript_MSTRG.39710.lgene_id | MSTRG.39710; |
| 9 StringTie exon      | 42141623 | 42141853 . | - . | transcript_MSTRG.39710.lgene_id | MSTRG.39710; |

|                       |          |            |     |                                 |              |
|-----------------------|----------|------------|-----|---------------------------------|--------------|
| 9 StringTie transcrip | 42617017 | 42620121 . | - . | transcript_MSTRG.39716.lgene_id | MSTRG.39716; |
| 9 StringTie exon      | 42617017 | 42617913 . | - . | transcript_MSTRG.39716.lgene_id | MSTRG.39716; |
| 9 StringTie exon      | 42619966 | 42620121 . | - . | transcript_MSTRG.39716.lgene_id | MSTRG.39716; |
| 9 StringTie transcrip | 43220727 | 43230994 . | - . | transcript_MSTRG.39719.lgene_id | MSTRG.39719; |
| 9 StringTie exon      | 43220727 | 43223789 . | - . | transcript_MSTRG.39719.lgene_id | MSTRG.39719; |
| 9 StringTie exon      | 43230625 | 43230994 . | - . | transcript_MSTRG.39719.lgene_id | MSTRG.39719; |
| 9 StringTie transcrip | 52743919 | 52758923 . | - . | transcript_MSTRG.39949.lgene_id | MSTRG.39949; |
| 9 StringTie exon      | 52743919 | 52744363 . | - . | transcript_MSTRG.39949.lgene_id | MSTRG.39949; |
| 9 StringTie exon      | 52754869 | 52758923 . | - . | transcript_MSTRG.39949.lgene_id | MSTRG.39949; |
| 9 StringTie transcrip | 57544333 | 57544769 . | - . | transcript_MSTRG.40059.lgene_id | MSTRG.40059; |
| 9 StringTie exon      | 57544333 | 57544527 . | - . | transcript_MSTRG.40059.lgene_id | MSTRG.40059; |
| 9 StringTie exon      | 57544629 | 57544769 . | - . | transcript_MSTRG.40059.lgene_id | MSTRG.40059; |
| 9 StringTie transcrip | 64863700 | 64869140 . | - . | transcript_MSTRG.40122.lgene_id | MSTRG.40122; |
| 9 StringTie exon      | 64863700 | 64867696 . | - . | transcript_MSTRG.40122.lgene_id | MSTRG.40122; |
| 9 StringTie exon      | 64868384 | 64869140 . | - . | transcript_MSTRG.40122.lgene_id | MSTRG.40122; |
| 9 StringTie transcrip | 67137460 | 67156366 . | - . | transcript_MSTRG.40166.lgene_id | MSTRG.40166; |
| 9 StringTie exon      | 67137460 | 67137666 . | - . | transcript_MSTRG.40166.lgene_id | MSTRG.40166; |
| 9 StringTie exon      | 67137871 | 67137961 . | - . | transcript_MSTRG.40166.lgene_id | MSTRG.40166; |
| 9 StringTie exon      | 67156194 | 67156366 . | - . | transcript_MSTRG.40166.lgene_id | MSTRG.40166; |
| 9 StringTie transcrip | 71372342 | 71598824 . | - . | transcript_MSTRG.40264.lgene_id | MSTRG.40264; |
| 9 StringTie exon      | 71372342 | 71372452 . | - . | transcript_MSTRG.40264.lgene_id | MSTRG.40264; |
| 9 StringTie exon      | 71420907 | 71421085 . | - . | transcript_MSTRG.40264.lgene_id | MSTRG.40264; |
| 9 StringTie exon      | 71598786 | 71598824 . | - . | transcript_MSTRG.40264.lgene_id | MSTRG.40264; |
| 9 StringTie transcrip | 74547449 | 74570858 . | - . | transcript_MSTRG.40392.lgene_id | MSTRG.40392; |
| 9 StringTie exon      | 74547449 | 74548195 . | - . | transcript_MSTRG.40392.lgene_id | MSTRG.40392; |
| 9 StringTie exon      | 74557279 | 74557492 . | - . | transcript_MSTRG.40392.lgene_id | MSTRG.40392; |
| 9 StringTie exon      | 74570812 | 74570858 . | - . | transcript_MSTRG.40392.lgene_id | MSTRG.40392; |
| 9 StringTie transcrip | 78063970 | 78219087 . | - . | transcript_MSTRG.40505.lgene_id | MSTRG.40505; |
| 9 StringTie exon      | 78063970 | 78064007 . | - . | transcript_MSTRG.40505.lgene_id | MSTRG.40505; |
| 9 StringTie exon      | 78218733 | 78219087 . | - . | transcript_MSTRG.40505.lgene_id | MSTRG.40505; |
| 9 StringTie transcrip | 81785200 | 81787325 . | - . | transcript_MSTRG.40543.lgene_id | MSTRG.40543; |
| 9 StringTie exon      | 81785200 | 81786165 . | - . | transcript_MSTRG.40543.lgene_id | MSTRG.40543; |
| 9 StringTie exon      | 81787132 | 81787325 . | - . | transcript_MSTRG.40543.lgene_id | MSTRG.40543; |
| 9 StringTie transcrip | 85311171 | 85318441 . | - . | transcript_MSTRG.40581.lgene_id | MSTRG.40581; |
| 9 StringTie exon      | 85311171 | 85311508 . | - . | transcript_MSTRG.40581.lgene_id | MSTRG.40581; |

|                       |           |           |   |   |   |                                 |              |
|-----------------------|-----------|-----------|---|---|---|---------------------------------|--------------|
| 9 StringTie exon      | 85318377  | 85318441  | . | - | . | transcript_MSTRG.40581.lgene_id | MSTRG.40581; |
| 9 StringTie transcrip | 85377473  | 85421316  | . | - | . | transcript_MSTRG.40593.lgene_id | MSTRG.40593; |
| 9 StringTie exon      | 85377473  | 85377848  | . | - | . | transcript_MSTRG.40593.lgene_id | MSTRG.40593; |
| 9 StringTie exon      | 85418943  | 85421316  | . | - | . | transcript_MSTRG.40593.lgene_id | MSTRG.40593; |
| 9 StringTie transcrip | 88116184  | 88279484  | . | - | . | transcript_MSTRG.40657.lgene_id | MSTRG.40657; |
| 9 StringTie exon      | 88116184  | 88118872  | . | - | . | transcript_MSTRG.40657.lgene_id | MSTRG.40657; |
| 9 StringTie exon      | 88168738  | 88168835  | . | - | . | transcript_MSTRG.40657.lgene_id | MSTRG.40657; |
| 9 StringTie exon      | 88279181  | 88279484  | . | - | . | transcript_MSTRG.40657.lgene_id | MSTRG.40657; |
| 9 StringTie transcrip | 88116590  | 88279508  | . | - | . | transcript_MSTRG.40657.lgene_id | MSTRG.40657; |
| 9 StringTie exon      | 88116590  | 88119279  | . | - | . | transcript_MSTRG.40657.lgene_id | MSTRG.40657; |
| 9 StringTie exon      | 88168738  | 88168835  | . | - | . | transcript_MSTRG.40657.lgene_id | MSTRG.40657; |
| 9 StringTie exon      | 88178970  | 88179094  | . | - | . | transcript_MSTRG.40657.lgene_id | MSTRG.40657; |
| 9 StringTie exon      | 88279181  | 88279508  | . | - | . | transcript_MSTRG.40657.lgene_id | MSTRG.40657; |
| 9 StringTie transcrip | 88118569  | 88278297  | . | - | . | transcript_MSTRG.40657.lgene_id | MSTRG.40657; |
| 9 StringTie exon      | 88118569  | 88119279  | . | - | . | transcript_MSTRG.40657.lgene_id | MSTRG.40657; |
| 9 StringTie exon      | 88168738  | 88168835  | . | - | . | transcript_MSTRG.40657.lgene_id | MSTRG.40657; |
| 9 StringTie exon      | 88178970  | 88179094  | . | - | . | transcript_MSTRG.40657.lgene_id | MSTRG.40657; |
| 9 StringTie exon      | 88278260  | 88278297  | . | - | . | transcript_MSTRG.40657.lgene_id | MSTRG.40657; |
| 9 StringTie transcrip | 93365360  | 93437518  | . | - | . | transcript_MSTRG.40736.lgene_id | MSTRG.40736; |
| 9 StringTie exon      | 93365360  | 93365398  | . | - | . | transcript_MSTRG.40736.lgene_id | MSTRG.40736; |
| 9 StringTie exon      | 93433915  | 93437518  | . | - | . | transcript_MSTRG.40736.lgene_id | MSTRG.40736; |
| 9 StringTie transcrip | 101312352 | 101312829 | . | - | . | transcript_MSTRG.40910.lgene_id | MSTRG.40910; |
| 9 StringTie exon      | 101312352 | 101312456 | . | - | . | transcript_MSTRG.40910.lgene_id | MSTRG.40910; |
| 9 StringTie exon      | 101312493 | 101312829 | . | - | . | transcript_MSTRG.40910.lgene_id | MSTRG.40910; |
| 9 StringTie transcrip | 105794287 | 105907571 | . | - | . | transcript_MSTRG.40985.lgene_id | MSTRG.40985; |
| 9 StringTie exon      | 105794287 | 105794325 | . | - | . | transcript_MSTRG.40985.lgene_id | MSTRG.40985; |
| 9 StringTie exon      | 105838629 | 105838741 | . | - | . | transcript_MSTRG.40985.lgene_id | MSTRG.40985; |
| 9 StringTie exon      | 105907230 | 105907571 | . | - | . | transcript_MSTRG.40985.lgene_id | MSTRG.40985; |
| 9 StringTie transcrip | 107446488 | 107456349 | . | - | . | transcript_MSTRG.41024.lgene_id | MSTRG.41024; |
| 9 StringTie exon      | 107446488 | 107446794 | . | - | . | transcript_MSTRG.41024.lgene_id | MSTRG.41024; |
| 9 StringTie exon      | 107456268 | 107456349 | . | - | . | transcript_MSTRG.41024.lgene_id | MSTRG.41024; |
| 9 StringTie transcrip | 116244477 | 116245065 | . | - | . | transcript_MSTRG.41179.lgene_id | MSTRG.41179; |
| 9 StringTie exon      | 116244477 | 116244694 | . | - | . | transcript_MSTRG.41179.lgene_id | MSTRG.41179; |
| 9 StringTie exon      | 116245026 | 116245065 | . | - | . | transcript_MSTRG.41179.lgene_id | MSTRG.41179; |
| 9 StringTie transcrip | 123591395 | 123620136 | . | - | . | transcript_MSTRG.41313.lgene_id | MSTRG.41313; |

|                           |           |           |   |   |   |                                 |              |
|---------------------------|-----------|-----------|---|---|---|---------------------------------|--------------|
| 9 StringTie exon          | 123591395 | 123591451 | . | - | . | transcript_MSTRG.41313.lgene_id | MSTRG.41313; |
| 9 StringTie exon          | 123619560 | 123619617 | . | - | . | transcript_MSTRG.41313.lgene_id | MSTRG.41313; |
| 9 StringTie exon          | 123619964 | 123620136 | . | - | . | transcript_MSTRG.41313.lgene_id | MSTRG.41313; |
| 9 StringTie transcript    | 123620782 | 123627495 | . | - | . | transcript_MSTRG.41315.lgene_id | MSTRG.41315; |
| 9 StringTie exon          | 123620782 | 123620927 | . | - | . | transcript_MSTRG.41315.lgene_id | MSTRG.41315; |
| 9 StringTie exon          | 123627252 | 123627495 | . | - | . | transcript_MSTRG.41315.lgene_id | MSTRG.41315; |
| 9 StringTie transcript    | 123627793 | 123630459 | . | - | . | transcript_MSTRG.41307.lgene_id | MSTRG.41307; |
| 9 StringTie exon          | 123627793 | 123628195 | . | - | . | transcript_MSTRG.41307.lgene_id | MSTRG.41307; |
| 9 StringTie exon          | 123629999 | 123630459 | . | - | . | transcript_MSTRG.41307.lgene_id | MSTRG.41307; |
| 9 StringTie transcript    | 124447063 | 124488317 | . | - | . | transcript_MSTRG.41350.lgene_id | MSTRG.41350; |
| 9 StringTie exon          | 124447063 | 124447087 | . | - | . | transcript_MSTRG.41350.lgene_id | MSTRG.41350; |
| 9 StringTie exon          | 124486225 | 124487047 | . | - | . | transcript_MSTRG.41350.lgene_id | MSTRG.41350; |
| 9 StringTie exon          | 124488050 | 124488317 | . | - | . | transcript_MSTRG.41350.lgene_id | MSTRG.41350; |
| 9 StringTie transcript    | 124534569 | 124536903 | . | - | . | transcript_MSTRG.41375.lgene_id | MSTRG.41375; |
| 9 StringTie exon          | 124534569 | 124534636 | . | - | . | transcript_MSTRG.41375.lgene_id | MSTRG.41375; |
| 9 StringTie exon          | 124535531 | 124536903 | . | - | . | transcript_MSTRG.41375.lgene_id | MSTRG.41375; |
| 9 StringTie transcript    | 124534569 | 124538749 | . | - | . | transcript_MSTRG.41375.lgene_id | MSTRG.41375; |
| 9 StringTie exon          | 124534569 | 124535762 | . | - | . | transcript_MSTRG.41375.lgene_id | MSTRG.41375; |
| 9 StringTie exon          | 124538688 | 124538749 | . | - | . | transcript_MSTRG.41375.lgene_id | MSTRG.41375; |
| 9 StringTie transcript    | 130519236 | 130541587 | . | - | . | transcript_MSTRG.41457.lgene_id | MSTRG.41457; |
| 9 StringTie exon          | 130519236 | 130519257 | . | - | . | transcript_MSTRG.41457.lgene_id | MSTRG.41457; |
| 9 StringTie exon          | 130541258 | 130541587 | . | - | . | transcript_MSTRG.41457.lgene_id | MSTRG.41457; |
| AEMK StringTie transcript | 63398     | 89423     | . | - | . | transcript_MSTRG.41613.lgene_id | MSTRG.41613; |
| AEMK StringTie exon       | 63398     | 63415     | . | - | . | transcript_MSTRG.41613.lgene_id | MSTRG.41613; |
| AEMK StringTie exon       | 88986     | 89423     | . | - | . | transcript_MSTRG.41613.lgene_id | MSTRG.41613; |
| AEMK StringTie transcript | 1106      | 7745      | . | - | . | transcript_MSTRG.41644.lgene_id | MSTRG.41644; |
| AEMK StringTie exon       | 1106      | 1267      | . | - | . | transcript_MSTRG.41644.lgene_id | MSTRG.41644; |
| AEMK StringTie exon       | 7668      | 7745      | . | - | . | transcript_MSTRG.41644.lgene_id | MSTRG.41644; |
| AEMK StringTie transcript | 7291      | 7744      | . | - | . | transcript_MSTRG.41644.lgene_id | MSTRG.41644; |
| AEMK StringTie exon       | 7291      | 7513      | . | - | . | transcript_MSTRG.41644.lgene_id | MSTRG.41644; |
| AEMK StringTie exon       | 7668      | 7744      | . | - | . | transcript_MSTRG.41644.lgene_id | MSTRG.41644; |
| AEMK StringTie transcript | 15683     | 17619     | . | + | . | transcript_MSTRG.41654.lgene_id | MSTRG.41654; |
| AEMK StringTie exon       | 15683     | 15851     | . | + | . | transcript_MSTRG.41654.lgene_id | MSTRG.41654; |
| AEMK StringTie exon       | 17030     | 17619     | . | + | . | transcript_MSTRG.41654.lgene_id | MSTRG.41654; |
| AEMK StringTie transcript | 2339      | 5679      | . | - | . | transcript_MSTRG.41713.lgene_id | MSTRG.41713; |

|                         |         |           |     |                                 |              |
|-------------------------|---------|-----------|-----|---------------------------------|--------------|
| AEMKStringTie exon      | 2339    | 2501 .    | - . | transcript_MSTRG.41713.lgene_id | MSTRG.41713; |
| AEMKStringTie exon      | 4253    | 4333 .    | - . | transcript_MSTRG.41713.lgene_id | MSTRG.41713; |
| AEMKStringTie exon      | 5620    | 5679 .    | - . | transcript_MSTRG.41713.lgene_id | MSTRG.41713; |
| AEMKStringTie transcrip | 15190   | 16664 .   | - . | transcript_MSTRG.41732.lgene_id | MSTRG.41732; |
| AEMKStringTie exon      | 15190   | 16004 .   | - . | transcript_MSTRG.41732.lgene_id | MSTRG.41732; |
| AEMKStringTie exon      | 16576   | 16664 .   | - . | transcript_MSTRG.41732.lgene_id | MSTRG.41732; |
| AEMKStringTie transcrip | 326889  | 328962 .  | - . | transcript_MSTRG.41775.lgene_id | MSTRG.41775; |
| AEMKStringTie exon      | 326889  | 326929 .  | - . | transcript_MSTRG.41775.lgene_id | MSTRG.41775; |
| AEMKStringTie exon      | 327871  | 328962 .  | - . | transcript_MSTRG.41775.lgene_id | MSTRG.41775; |
| AEMKStringTie transcrip | 10834   | 14297 .   | - . | transcript_MSTRG.41778.lgene_id | MSTRG.41778; |
| AEMKStringTie exon      | 10834   | 13649 .   | - . | transcript_MSTRG.41778.lgene_id | MSTRG.41778; |
| AEMKStringTie exon      | 14238   | 14297 .   | - . | transcript_MSTRG.41778.lgene_id | MSTRG.41778; |
| AEMKStringTie transcrip | 20264   | 27991 .   | - . | transcript_MSTRG.41820.lgene_id | MSTRG.41820; |
| AEMKStringTie exon      | 20264   | 23729 .   | - . | transcript_MSTRG.41820.lgene_id | MSTRG.41820; |
| AEMKStringTie exon      | 24319   | 24503 .   | - . | transcript_MSTRG.41820.lgene_id | MSTRG.41820; |
| AEMKStringTie exon      | 27595   | 27991 .   | - . | transcript_MSTRG.41820.lgene_id | MSTRG.41820; |
| AEMKStringTie transcrip | 933397  | 962762 .  | + . | transcript_MSTRG.41903.lgene_id | MSTRG.41903; |
| AEMKStringTie exon      | 933397  | 933419 .  | + . | transcript_MSTRG.41903.lgene_id | MSTRG.41903; |
| AEMKStringTie exon      | 962416  | 962762 .  | + . | transcript_MSTRG.41903.lgene_id | MSTRG.41903; |
| AEMKStringTie transcrip | 3361474 | 3361988 . | + . | transcript_MSTRG.41992.lgene_id | MSTRG.41992; |
| AEMKStringTie exon      | 3361474 | 3361570 . | + . | transcript_MSTRG.41992.lgene_id | MSTRG.41992; |
| AEMKStringTie exon      | 3361728 | 3361988 . | + . | transcript_MSTRG.41992.lgene_id | MSTRG.41992; |
| AEMKStringTie transcrip | 3615213 | 3676789 . | + . | transcript_MSTRG.42045.lgene_id | MSTRG.42045; |
| AEMKStringTie exon      | 3615213 | 3615323 . | + . | transcript_MSTRG.42045.lgene_id | MSTRG.42045; |
| AEMKStringTie exon      | 3676699 | 3676789 . | + . | transcript_MSTRG.42045.lgene_id | MSTRG.42045; |
| AEMKStringTie transcrip | 3658497 | 3676803 . | + . | transcript_MSTRG.42045.lgene_id | MSTRG.42045; |
| AEMKStringTie exon      | 3658497 | 3658605 . | + . | transcript_MSTRG.42045.lgene_id | MSTRG.42045; |
| AEMKStringTie exon      | 3676699 | 3676803 . | + . | transcript_MSTRG.42045.lgene_id | MSTRG.42045; |
| AEMKStringTie transcrip | 3634441 | 3659579 . | + . | transcript_MSTRG.42046.lgene_id | MSTRG.42046; |
| AEMKStringTie exon      | 3634441 | 3634546 . | + . | transcript_MSTRG.42046.lgene_id | MSTRG.42046; |
| AEMKStringTie exon      | 3659472 | 3659579 . | + . | transcript_MSTRG.42046.lgene_id | MSTRG.42046; |
| AEMKStringTie transcrip | 3659354 | 3699937 . | + . | transcript_MSTRG.42047.lgene_id | MSTRG.42047; |
| AEMKStringTie exon      | 3659354 | 3659435 . | + . | transcript_MSTRG.42047.lgene_id | MSTRG.42047; |
| AEMKStringTie exon      | 3677529 | 3677564 . | + . | transcript_MSTRG.42047.lgene_id | MSTRG.42047; |
| AEMKStringTie exon      | 3699829 | 3699937 . | + . | transcript_MSTRG.42047.lgene_id | MSTRG.42047; |



|                         |        |          |   |   |                                 |              |
|-------------------------|--------|----------|---|---|---------------------------------|--------------|
| AEMKStringTie exon      | 775853 | 776016 . | + | . | transcript_MSTRG.42120.7gene_id | MSTRG.42120; |
| AEMKStringTie exon      | 777768 | 777864 . | + | . | transcript_MSTRG.42120.7gene_id | MSTRG.42120; |
| AEMKStringTie exon      | 782391 | 782495 . | + | . | transcript_MSTRG.42120.7gene_id | MSTRG.42120; |
| AEMKStringTie transcrip | 775766 | 784478 . | + | . | transcript_MSTRG.42120.8gene_id | MSTRG.42120; |
| AEMKStringTie exon      | 775766 | 776016 . | + | . | transcript_MSTRG.42120.8gene_id | MSTRG.42120; |
| AEMKStringTie exon      | 784110 | 784478 . | + | . | transcript_MSTRG.42120.8gene_id | MSTRG.42120; |
| AEMKStringTie transcrip | 775806 | 782495 . | + | . | transcript_MSTRG.42120.8gene_id | MSTRG.42120; |
| AEMKStringTie exon      | 775806 | 776016 . | + | . | transcript_MSTRG.42120.8gene_id | MSTRG.42120; |
| AEMKStringTie exon      | 782391 | 782495 . | + | . | transcript_MSTRG.42120.8gene_id | MSTRG.42120; |
| AEMKStringTie transcrip | 8486   | 61488 .  | - | . | transcript_MSTRG.42165.1gene_id | MSTRG.42165; |
| AEMKStringTie exon      | 8486   | 9044 .   | - | . | transcript_MSTRG.42165.1gene_id | MSTRG.42165; |
| AEMKStringTie exon      | 61183  | 61488 .  | - | . | transcript_MSTRG.42165.1gene_id | MSTRG.42165; |
| AEMKStringTie transcrip | 61024  | 117317 . | - | . | transcript_MSTRG.42167.1gene_id | MSTRG.42167; |
| AEMKStringTie exon      | 61024  | 61182 .  | - | . | transcript_MSTRG.42167.1gene_id | MSTRG.42167; |
| AEMKStringTie exon      | 117273 | 117317 . | - | . | transcript_MSTRG.42167.1gene_id | MSTRG.42167; |
| AEMKStringTie transcrip | 4306   | 10737 .  | + | . | transcript_MSTRG.42145.1gene_id | MSTRG.42145; |
| AEMKStringTie exon      | 4306   | 4526 .   | + | . | transcript_MSTRG.42145.1gene_id | MSTRG.42145; |
| AEMKStringTie exon      | 10562  | 10737 .  | + | . | transcript_MSTRG.42145.1gene_id | MSTRG.42145; |
| AEMKStringTie transcrip | 4767   | 12149 .  | + | . | transcript_MSTRG.42146.1gene_id | MSTRG.42146; |
| AEMKStringTie exon      | 4767   | 5335 .   | + | . | transcript_MSTRG.42146.1gene_id | MSTRG.42146; |
| AEMKStringTie exon      | 11371  | 12149 .  | + | . | transcript_MSTRG.42146.1gene_id | MSTRG.42146; |
| AEMKStringTie transcrip | 16881  | 23557 .  | + | . | transcript_MSTRG.42147.1gene_id | MSTRG.42147; |
| AEMKStringTie exon      | 16881  | 17405 .  | + | . | transcript_MSTRG.42147.1gene_id | MSTRG.42147; |
| AEMKStringTie exon      | 23443  | 23557 .  | + | . | transcript_MSTRG.42147.1gene_id | MSTRG.42147; |
| AEMKStringTie transcrip | 103826 | 138067 . | + | . | transcript_MSTRG.42158.1gene_id | MSTRG.42158; |
| AEMKStringTie exon      | 103826 | 104214 . | + | . | transcript_MSTRG.42158.1gene_id | MSTRG.42158; |
| AEMKStringTie exon      | 133823 | 134007 . | + | . | transcript_MSTRG.42158.1gene_id | MSTRG.42158; |
| AEMKStringTie exon      | 134593 | 138067 . | + | . | transcript_MSTRG.42158.1gene_id | MSTRG.42158; |
| AEMKStringTie transcrip | 125217 | 138059 . | + | . | transcript_MSTRG.42158.2gene_id | MSTRG.42158; |
| AEMKStringTie exon      | 125217 | 125242 . | + | . | transcript_MSTRG.42158.2gene_id | MSTRG.42158; |
| AEMKStringTie exon      | 130561 | 130732 . | + | . | transcript_MSTRG.42158.2gene_id | MSTRG.42158; |
| AEMKStringTie exon      | 133823 | 134007 . | + | . | transcript_MSTRG.42158.2gene_id | MSTRG.42158; |
| AEMKStringTie exon      | 134593 | 138059 . | + | . | transcript_MSTRG.42158.2gene_id | MSTRG.42158; |
| AEMKStringTie transcrip | 88792  | 93778 .  | - | . | transcript_MSTRG.42193.1gene_id | MSTRG.42193; |
| AEMKStringTie exon      | 88792  | 89826 .  | - | . | transcript_MSTRG.42193.1gene_id | MSTRG.42193; |

|                         |         |           |     |                                 |              |
|-------------------------|---------|-----------|-----|---------------------------------|--------------|
| AEMKStringTie exon      | 91604   | 91751 .   | - . | transcript_MSTRG.42193.lgene_id | MSTRG.42193; |
| AEMKStringTie exon      | 92295   | 92446 .   | - . | transcript_MSTRG.42193.lgene_id | MSTRG.42193; |
| AEMKStringTie exon      | 92895   | 93778 .   | - . | transcript_MSTRG.42193.lgene_id | MSTRG.42193; |
| AEMKStringTie transcrip | 24329   | 24855 .   | + . | transcript_MSTRG.42180.lgene_id | MSTRG.42180; |
| AEMKStringTie exon      | 24329   | 24706 .   | + . | transcript_MSTRG.42180.lgene_id | MSTRG.42180; |
| AEMKStringTie exon      | 24737   | 24855 .   | + . | transcript_MSTRG.42180.lgene_id | MSTRG.42180; |
| AEMKStringTie transcrip | 2133    | 25073 .   | - . | transcript_MSTRG.42191.lgene_id | MSTRG.42191; |
| AEMKStringTie exon      | 2133    | 2219 .    | - . | transcript_MSTRG.42191.lgene_id | MSTRG.42191; |
| AEMKStringTie exon      | 3682    | 3794 .    | - . | transcript_MSTRG.42191.lgene_id | MSTRG.42191; |
| AEMKStringTie exon      | 24862   | 25073 .   | - . | transcript_MSTRG.42191.lgene_id | MSTRG.42191; |
| AEMKStringTie transcrip | 1058466 | 1063776 . | + . | transcript_MSTRG.42274.lgene_id | MSTRG.42274; |
| AEMKStringTie exon      | 1058466 | 1058660 . | + . | transcript_MSTRG.42274.lgene_id | MSTRG.42274; |
| AEMKStringTie exon      | 1059177 | 1059217 . | + . | transcript_MSTRG.42274.lgene_id | MSTRG.42274; |
| AEMKStringTie exon      | 1060568 | 1060633 . | + . | transcript_MSTRG.42274.lgene_id | MSTRG.42274; |
| AEMKStringTie exon      | 1061420 | 1061494 . | + . | transcript_MSTRG.42274.lgene_id | MSTRG.42274; |
| AEMKStringTie exon      | 1063373 | 1063776 . | + . | transcript_MSTRG.42274.lgene_id | MSTRG.42274; |
| AEMKStringTie transcrip | 1058528 | 1063776 . | + . | transcript_MSTRG.42274.lgene_id | MSTRG.42274; |
| AEMKStringTie exon      | 1058528 | 1058709 . | + . | transcript_MSTRG.42274.lgene_id | MSTRG.42274; |
| AEMKStringTie exon      | 1059177 | 1059217 . | + . | transcript_MSTRG.42274.lgene_id | MSTRG.42274; |
| AEMKStringTie exon      | 1060568 | 1060633 . | + . | transcript_MSTRG.42274.lgene_id | MSTRG.42274; |
| AEMKStringTie exon      | 1061420 | 1061494 . | + . | transcript_MSTRG.42274.lgene_id | MSTRG.42274; |
| AEMKStringTie exon      | 1063373 | 1063776 . | + . | transcript_MSTRG.42274.lgene_id | MSTRG.42274; |
| AEMKStringTie transcrip | 402934  | 408296 .  | - . | transcript_MSTRG.42223.lgene_id | MSTRG.42223; |
| AEMKStringTie exon      | 402934  | 402997 .  | - . | transcript_MSTRG.42223.lgene_id | MSTRG.42223; |
| AEMKStringTie exon      | 408094  | 408296 .  | - . | transcript_MSTRG.42223.lgene_id | MSTRG.42223; |
| AEMKStringTie transcrip | 839454  | 840881 .  | - . | transcript_MSTRG.42256.lgene_id | MSTRG.42256; |
| AEMKStringTie exon      | 839454  | 840683 .  | - . | transcript_MSTRG.42256.lgene_id | MSTRG.42256; |
| AEMKStringTie exon      | 840771  | 840881 .  | - . | transcript_MSTRG.42256.lgene_id | MSTRG.42256; |
| AEMKStringTie transcrip | 1556164 | 1556993 . | - . | transcript_MSTRG.42294.lgene_id | MSTRG.42294; |
| AEMKStringTie exon      | 1556164 | 1556230 . | - . | transcript_MSTRG.42294.lgene_id | MSTRG.42294; |
| AEMKStringTie exon      | 1556359 | 1556993 . | - . | transcript_MSTRG.42294.lgene_id | MSTRG.42294; |
| AEMKStringTie transcrip | 10139   | 45216 .   | - . | transcript_MSTRG.42362.lgene_id | MSTRG.42362; |
| AEMKStringTie exon      | 10139   | 13625 .   | - . | transcript_MSTRG.42362.lgene_id | MSTRG.42362; |
| AEMKStringTie exon      | 14212   | 14396 .   | - . | transcript_MSTRG.42362.lgene_id | MSTRG.42362; |
| AEMKStringTie exon      | 45094   | 45216 .   | - . | transcript_MSTRG.42362.lgene_id | MSTRG.42362; |



|               |           |           |         |         |                                 |                                 |              |
|---------------|-----------|-----------|---------|---------|---------------------------------|---------------------------------|--------------|
| AEMKStringTie | transcrip | 10144     | 45210 . | - .     | transcript_MSTRG.42362.¿gene_id | MSTRG.42362;                    |              |
| AEMKStringTie | exon      | 10144     | 13625 . | - .     | transcript_MSTRG.42362.¿gene_id | MSTRG.42362;                    |              |
| AEMKStringTie | exon      | 14212     | 14396 . | - .     | transcript_MSTRG.42362.¿gene_id | MSTRG.42362;                    |              |
| AEMKStringTie | exon      | 45154     | 45210 . | - .     | transcript_MSTRG.42362.¿gene_id | MSTRG.42362;                    |              |
| MT            | StringTie | transcrip | 1       | 9630 .  | - .                             | transcript_MSTRG.42387.¿gene_id | MSTRG.42387; |
| MT            | StringTie | exon      | 1       | 144 .   | - .                             | transcript_MSTRG.42387.¿gene_id | MSTRG.42387; |
| MT            | StringTie | exon      | 2994    | 3149 .  | - .                             | transcript_MSTRG.42387.¿gene_id | MSTRG.42387; |
| MT            | StringTie | exon      | 9520    | 9630 .  | - .                             | transcript_MSTRG.42387.¿gene_id | MSTRG.42387; |
| MT            | StringTie | transcrip | 2567    | 9630 .  | - .                             | transcript_MSTRG.42387.¿gene_id | MSTRG.42387; |
| MT            | StringTie | exon      | 2567    | 2677 .  | - .                             | transcript_MSTRG.42387.¿gene_id | MSTRG.42387; |
| MT            | StringTie | exon      | 4413    | 4518 .  | - .                             | transcript_MSTRG.42387.¿gene_id | MSTRG.42387; |
| MT            | StringTie | exon      | 4577    | 4731 .  | - .                             | transcript_MSTRG.42387.¿gene_id | MSTRG.42387; |
| MT            | StringTie | exon      | 9172    | 9319 .  | - .                             | transcript_MSTRG.42387.¿gene_id | MSTRG.42387; |
| MT            | StringTie | exon      | 9423    | 9630 .  | - .                             | transcript_MSTRG.42387.¿gene_id | MSTRG.42387; |
| MT            | StringTie | transcrip | 2567    | 9639 .  | - .                             | transcript_MSTRG.42387.¿gene_id | MSTRG.42387; |
| MT            | StringTie | exon      | 2567    | 2677 .  | - .                             | transcript_MSTRG.42387.¿gene_id | MSTRG.42387; |
| MT            | StringTie | exon      | 9098    | 9319 .  | - .                             | transcript_MSTRG.42387.¿gene_id | MSTRG.42387; |
| MT            | StringTie | exon      | 9423    | 9639 .  | - .                             | transcript_MSTRG.42387.¿gene_id | MSTRG.42387; |
| MT            | StringTie | transcrip | 2738    | 12567 . | - .                             | transcript_MSTRG.42387.¿gene_id | MSTRG.42387; |
| MT            | StringTie | exon      | 2738    | 2862 .  | - .                             | transcript_MSTRG.42387.¿gene_id | MSTRG.42387; |
| MT            | StringTie | exon      | 12457   | 12567 . | - .                             | transcript_MSTRG.42387.¿gene_id | MSTRG.42387; |
| MT            | StringTie | transcrip | 2738    | 12726 . | - .                             | transcript_MSTRG.42387.¿gene_id | MSTRG.42387; |
| MT            | StringTie | exon      | 2738    | 2848 .  | - .                             | transcript_MSTRG.42387.¿gene_id | MSTRG.42387; |
| MT            | StringTie | exon      | 12112   | 12387 . | - .                             | transcript_MSTRG.42387.¿gene_id | MSTRG.42387; |
| MT            | StringTie | exon      | 12457   | 12726 . | - .                             | transcript_MSTRG.42387.¿gene_id | MSTRG.42387; |
| MT            | StringTie | transcrip | 3024    | 9603 .  | - .                             | transcript_MSTRG.42387.¿gene_id | MSTRG.42387; |
| MT            | StringTie | exon      | 3024    | 3119 .  | - .                             | transcript_MSTRG.42387.¿gene_id | MSTRG.42387; |
| MT            | StringTie | exon      | 9493    | 9603 .  | - .                             | transcript_MSTRG.42387.¿gene_id | MSTRG.42387; |
| MT            | StringTie | transcrip | 5432    | 5809 .  | - .                             | transcript_MSTRG.42387.¿gene_id | MSTRG.42387; |
| MT            | StringTie | exon      | 5432    | 5542 .  | - .                             | transcript_MSTRG.42387.¿gene_id | MSTRG.42387; |
| MT            | StringTie | exon      | 5699    | 5809 .  | - .                             | transcript_MSTRG.42387.¿gene_id | MSTRG.42387; |
| MT            | StringTie | transcrip | 5432    | 16248 . | - .                             | transcript_MSTRG.42387.¿gene_id | MSTRG.42387; |
| MT            | StringTie | exon      | 5432    | 5542 .  | - .                             | transcript_MSTRG.42387.¿gene_id | MSTRG.42387; |
| MT            | StringTie | exon      | 5605    | 5751 .  | - .                             | transcript_MSTRG.42387.¿gene_id | MSTRG.42387; |
| MT            | StringTie | exon      | 16112   | 16248 . | - .                             | transcript_MSTRG.42387.¿gene_id | MSTRG.42387; |

|    |                      |       |         |     |                                 |              |
|----|----------------------|-------|---------|-----|---------------------------------|--------------|
| MT | StringTie transcript | 7093  | 9603 .  | - . | transcript_MSTRG.42387.lgene_id | MSTRG.42387; |
| MT | StringTie exon       | 7093  | 7163 .  | - . | transcript_MSTRG.42387.lgene_id | MSTRG.42387; |
| MT | StringTie exon       | 9412  | 9603 .  | - . | transcript_MSTRG.42387.lgene_id | MSTRG.42387; |
| MT | StringTie transcript | 7418  | 12016 . | - . | transcript_MSTRG.42387.lgene_id | MSTRG.42387; |
| MT | StringTie exon       | 7418  | 7528 .  | - . | transcript_MSTRG.42387.lgene_id | MSTRG.42387; |
| MT | StringTie exon       | 7869  | 7983 .  | - . | transcript_MSTRG.42387.lgene_id | MSTRG.42387; |
| MT | StringTie exon       | 9320  | 9563 .  | - . | transcript_MSTRG.42387.lgene_id | MSTRG.42387; |
| MT | StringTie exon       | 9624  | 9750 .  | - . | transcript_MSTRG.42387.lgene_id | MSTRG.42387; |
| MT | StringTie exon       | 11911 | 12016 . | - . | transcript_MSTRG.42387.lgene_id | MSTRG.42387; |
| MT | StringTie transcript | 7730  | 10384 . | - . | transcript_MSTRG.42387.lgene_id | MSTRG.42387; |
| MT | StringTie exon       | 7730  | 7840 .  | - . | transcript_MSTRG.42387.lgene_id | MSTRG.42387; |
| MT | StringTie exon       | 10234 | 10384 . | - . | transcript_MSTRG.42387.lgene_id | MSTRG.42387; |
| MT | StringTie transcript | 8479  | 12568 . | - . | transcript_MSTRG.42387.lgene_id | MSTRG.42387; |
| MT | StringTie exon       | 8479  | 8590 .  | - . | transcript_MSTRG.42387.lgene_id | MSTRG.42387; |
| MT | StringTie exon       | 12457 | 12568 . | - . | transcript_MSTRG.42387.lgene_id | MSTRG.42387; |
| MT | StringTie transcript | 8984  | 12567 . | - . | transcript_MSTRG.42387.lgene_id | MSTRG.42387; |
| MT | StringTie exon       | 8984  | 9206 .  | - . | transcript_MSTRG.42387.lgene_id | MSTRG.42387; |
| MT | StringTie exon       | 12457 | 12567 . | - . | transcript_MSTRG.42387.lgene_id | MSTRG.42387; |
| MT | StringTie transcript | 10004 | 13143 . | - . | transcript_MSTRG.42387.lgene_id | MSTRG.42387; |
| MT | StringTie exon       | 10004 | 10114 . | - . | transcript_MSTRG.42387.lgene_id | MSTRG.42387; |
| MT | StringTie exon       | 12457 | 12701 . | - . | transcript_MSTRG.42387.lgene_id | MSTRG.42387; |
| MT | StringTie exon       | 13025 | 13143 . | - . | transcript_MSTRG.42387.lgene_id | MSTRG.42387; |
| MT | StringTie transcript | 10064 | 10456 . | - . | transcript_MSTRG.42387.lgene_id | MSTRG.42387; |
| MT | StringTie exon       | 10064 | 10200 . | - . | transcript_MSTRG.42387.lgene_id | MSTRG.42387; |
| MT | StringTie exon       | 10274 | 10456 . | - . | transcript_MSTRG.42387.lgene_id | MSTRG.42387; |
| MT | StringTie transcript | 10079 | 10427 . | - . | transcript_MSTRG.42387.lgene_id | MSTRG.42387; |
| MT | StringTie exon       | 10079 | 10233 . | - . | transcript_MSTRG.42387.lgene_id | MSTRG.42387; |
| MT | StringTie exon       | 10297 | 10427 . | - . | transcript_MSTRG.42387.lgene_id | MSTRG.42387; |
| MT | StringTie transcript | 15708 | 16250 . | - . | transcript_MSTRG.42387.lgene_id | MSTRG.42387; |
| MT | StringTie exon       | 15708 | 15880 . | - . | transcript_MSTRG.42387.lgene_id | MSTRG.42387; |
| MT | StringTie exon       | 16037 | 16085 . | - . | transcript_MSTRG.42387.lgene_id | MSTRG.42387; |
| MT | StringTie exon       | 16122 | 16250 . | - . | transcript_MSTRG.42387.lgene_id | MSTRG.42387; |
| MT | StringTie transcript | 15834 | 16232 . | - . | transcript_MSTRG.42387.lgene_id | MSTRG.42387; |
| MT | StringTie exon       | 15834 | 15963 . | - . | transcript_MSTRG.42387.lgene_id | MSTRG.42387; |
| MT | StringTie exon       | 16122 | 16232 . | - . | transcript_MSTRG.42387.lgene_id | MSTRG.42387; |

|    |           |           |          |          |   |   |   |                          |         |              |
|----|-----------|-----------|----------|----------|---|---|---|--------------------------|---------|--------------|
| MT | StringTie | transcrip | 15945    | 16250    | . | - | . | transcript_MSTRG.42387.1 | gene_id | MSTRG.42387; |
| MT | StringTie | exon      | 15945    | 16085    | . | - | . | transcript_MSTRG.42387.1 | gene_id | MSTRG.42387; |
| MT | StringTie | exon      | 16138    | 16250    | . | - | . | transcript_MSTRG.42387.1 | gene_id | MSTRG.42387; |
| MT | StringTie | transcrip | 11274    | 11614    | . | - | . | transcript_MSTRG.42387.1 | gene_id | MSTRG.42387; |
| MT | StringTie | exon      | 11274    | 11350    | . | - | . | transcript_MSTRG.42387.1 | gene_id | MSTRG.42387; |
| MT | StringTie | exon      | 11417    | 11614    | . | - | . | transcript_MSTRG.42387.1 | gene_id | MSTRG.42387; |
| X  | StringTie | transcrip | 123389   | 124088   | . | + | . | transcript_MSTRG.42379.1 | gene_id | MSTRG.42379; |
| X  | StringTie | exon      | 123389   | 123599   | . | + | . | transcript_MSTRG.42379.1 | gene_id | MSTRG.42379; |
| X  | StringTie | exon      | 124038   | 124088   | . | + | . | transcript_MSTRG.42379.1 | gene_id | MSTRG.42379; |
| X  | StringTie | transcrip | 17954049 | 18000839 | . | + | . | transcript_MSTRG.42563.1 | gene_id | MSTRG.42563; |
| X  | StringTie | exon      | 17954049 | 17954090 | . | + | . | transcript_MSTRG.42563.1 | gene_id | MSTRG.42563; |
| X  | StringTie | exon      | 17997505 | 17997575 | . | + | . | transcript_MSTRG.42563.1 | gene_id | MSTRG.42563; |
| X  | StringTie | exon      | 18000686 | 18000839 | . | + | . | transcript_MSTRG.42563.1 | gene_id | MSTRG.42563; |
| X  | StringTie | transcrip | 38902375 | 38908896 | . | + | . | transcript_MSTRG.42745.1 | gene_id | MSTRG.42745; |
| X  | StringTie | exon      | 38902375 | 38902507 | . | + | . | transcript_MSTRG.42745.1 | gene_id | MSTRG.42745; |
| X  | StringTie | exon      | 38903448 | 38903844 | . | + | . | transcript_MSTRG.42745.1 | gene_id | MSTRG.42745; |
| X  | StringTie | exon      | 38908790 | 38908896 | . | + | . | transcript_MSTRG.42745.1 | gene_id | MSTRG.42745; |
| X  | StringTie | transcrip | 41916338 | 41933353 | . | + | . | transcript_MSTRG.42790.1 | gene_id | MSTRG.42790; |
| X  | StringTie | exon      | 41916338 | 41916354 | . | + | . | transcript_MSTRG.42790.1 | gene_id | MSTRG.42790; |
| X  | StringTie | exon      | 41932961 | 41933353 | . | + | . | transcript_MSTRG.42790.1 | gene_id | MSTRG.42790; |
| X  | StringTie | transcrip | 43193282 | 43201542 | . | + | . | transcript_MSTRG.42838.1 | gene_id | MSTRG.42838; |
| X  | StringTie | exon      | 43193282 | 43193352 | . | + | . | transcript_MSTRG.42838.1 | gene_id | MSTRG.42838; |
| X  | StringTie | exon      | 43200984 | 43201542 | . | + | . | transcript_MSTRG.42838.1 | gene_id | MSTRG.42838; |
| X  | StringTie | transcrip | 45856403 | 45858832 | . | + | . | transcript_MSTRG.42891.1 | gene_id | MSTRG.42891; |
| X  | StringTie | exon      | 45856403 | 45856660 | . | + | . | transcript_MSTRG.42891.1 | gene_id | MSTRG.42891; |
| X  | StringTie | exon      | 45858784 | 45858832 | . | + | . | transcript_MSTRG.42891.1 | gene_id | MSTRG.42891; |
| X  | StringTie | transcrip | 47703572 | 47780522 | . | + | . | transcript_MSTRG.42949.1 | gene_id | MSTRG.42949; |
| X  | StringTie | exon      | 47703572 | 47703873 | . | + | . | transcript_MSTRG.42949.1 | gene_id | MSTRG.42949; |
| X  | StringTie | exon      | 47780418 | 47780522 | . | + | . | transcript_MSTRG.42949.1 | gene_id | MSTRG.42949; |
| X  | StringTie | transcrip | 47704400 | 47781299 | . | + | . | transcript_MSTRG.42951.1 | gene_id | MSTRG.42951; |
| X  | StringTie | exon      | 47704400 | 47704658 | . | + | . | transcript_MSTRG.42951.1 | gene_id | MSTRG.42951; |
| X  | StringTie | exon      | 47781201 | 47781299 | . | + | . | transcript_MSTRG.42951.1 | gene_id | MSTRG.42951; |
| X  | StringTie | transcrip | 48953580 | 48986602 | . | + | . | transcript_MSTRG.42980.1 | gene_id | MSTRG.42980; |
| X  | StringTie | exon      | 48953580 | 48953648 | . | + | . | transcript_MSTRG.42980.1 | gene_id | MSTRG.42980; |
| X  | StringTie | exon      | 48986400 | 48986602 | . | + | . | transcript_MSTRG.42980.1 | gene_id | MSTRG.42980; |

|   |                      |           |           |   |   |   |                                 |              |
|---|----------------------|-----------|-----------|---|---|---|---------------------------------|--------------|
| X | StringTie transcript | 56463836  | 56465669  | . | + | . | transcript_MSTRG.43156.lgene_id | MSTRG.43156; |
| X | StringTie exon       | 56463836  | 56464252  | . | + | . | transcript_MSTRG.43156.lgene_id | MSTRG.43156; |
| X | StringTie exon       | 56464792  | 56465669  | . | + | . | transcript_MSTRG.43156.lgene_id | MSTRG.43156; |
| X | StringTie transcript | 57483652  | 57488565  | . | + | . | transcript_MSTRG.43179.lgene_id | MSTRG.43179; |
| X | StringTie exon       | 57483652  | 57483762  | . | + | . | transcript_MSTRG.43179.lgene_id | MSTRG.43179; |
| X | StringTie exon       | 57488423  | 57488565  | . | + | . | transcript_MSTRG.43179.lgene_id | MSTRG.43179; |
| X | StringTie transcript | 59490596  | 59557323  | . | + | . | transcript_MSTRG.43296.lgene_id | MSTRG.43296; |
| X | StringTie exon       | 59490596  | 59490909  | . | + | . | transcript_MSTRG.43296.lgene_id | MSTRG.43296; |
| X | StringTie exon       | 59555996  | 59557323  | . | + | . | transcript_MSTRG.43296.lgene_id | MSTRG.43296; |
| X | StringTie transcript | 59511286  | 59557197  | . | + | . | transcript_MSTRG.43296.lgene_id | MSTRG.43296; |
| X | StringTie exon       | 59511286  | 59511652  | . | + | . | transcript_MSTRG.43296.lgene_id | MSTRG.43296; |
| X | StringTie exon       | 59513367  | 59513455  | . | + | . | transcript_MSTRG.43296.lgene_id | MSTRG.43296; |
| X | StringTie exon       | 59555996  | 59557197  | . | + | . | transcript_MSTRG.43296.lgene_id | MSTRG.43296; |
| X | StringTie transcript | 60626650  | 60627001  | . | + | . | transcript_MSTRG.43340.lgene_id | MSTRG.43340; |
| X | StringTie exon       | 60626650  | 60626758  | . | + | . | transcript_MSTRG.43340.lgene_id | MSTRG.43340; |
| X | StringTie exon       | 60626892  | 60627001  | . | + | . | transcript_MSTRG.43340.lgene_id | MSTRG.43340; |
| X | StringTie transcript | 83223821  | 83224690  | . | + | . | transcript_MSTRG.43611.lgene_id | MSTRG.43611; |
| X | StringTie exon       | 83223821  | 83223920  | . | + | . | transcript_MSTRG.43611.lgene_id | MSTRG.43611; |
| X | StringTie exon       | 83224417  | 83224690  | . | + | . | transcript_MSTRG.43611.lgene_id | MSTRG.43611; |
| X | StringTie transcript | 84922666  | 84924863  | . | + | . | transcript_MSTRG.43678.lgene_id | MSTRG.43678; |
| X | StringTie exon       | 84922666  | 84922705  | . | + | . | transcript_MSTRG.43678.lgene_id | MSTRG.43678; |
| X | StringTie exon       | 84924656  | 84924863  | . | + | . | transcript_MSTRG.43678.lgene_id | MSTRG.43678; |
| X | StringTie transcript | 94983320  | 94986601  | . | + | . | transcript_MSTRG.43766.lgene_id | MSTRG.43766; |
| X | StringTie exon       | 94983320  | 94983449  | . | + | . | transcript_MSTRG.43766.lgene_id | MSTRG.43766; |
| X | StringTie exon       | 94986508  | 94986601  | . | + | . | transcript_MSTRG.43766.lgene_id | MSTRG.43766; |
| X | StringTie transcript | 98758640  | 98821328  | . | + | . | transcript_MSTRG.43846.lgene_id | MSTRG.43846; |
| X | StringTie exon       | 98758640  | 98758879  | . | + | . | transcript_MSTRG.43846.lgene_id | MSTRG.43846; |
| X | StringTie exon       | 98771798  | 98771922  | . | + | . | transcript_MSTRG.43846.lgene_id | MSTRG.43846; |
| X | StringTie exon       | 98821106  | 98821328  | . | + | . | transcript_MSTRG.43846.lgene_id | MSTRG.43846; |
| X | StringTie transcript | 98812630  | 98821328  | . | + | . | transcript_MSTRG.43846.lgene_id | MSTRG.43846; |
| X | StringTie exon       | 98812630  | 98812697  | . | + | . | transcript_MSTRG.43846.lgene_id | MSTRG.43846; |
| X | StringTie exon       | 98821106  | 98821328  | . | + | . | transcript_MSTRG.43846.lgene_id | MSTRG.43846; |
| X | StringTie transcript | 109538090 | 109541377 | . | + | . | transcript_MSTRG.43921.lgene_id | MSTRG.43921; |
| X | StringTie exon       | 109538090 | 109538220 | . | + | . | transcript_MSTRG.43921.lgene_id | MSTRG.43921; |
| X | StringTie exon       | 109541255 | 109541377 | . | + | . | transcript_MSTRG.43921.lgene_id | MSTRG.43921; |

|   |           |           |           |           |   |   |   |                         |          |              |
|---|-----------|-----------|-----------|-----------|---|---|---|-------------------------|----------|--------------|
| X | StringTie | transcrip | 110810159 | 110810779 | . | + | . | transcript_MSTRG.43950. | lgene_id | MSTRG.43950; |
| X | StringTie | exon      | 110810159 | 110810779 | . | + | . | transcript_MSTRG.43950. | lgene_id | MSTRG.43950; |
| X | StringTie | transcrip | 110810174 | 110834078 | . | + | . | transcript_MSTRG.43950. | lgene_id | MSTRG.43950; |
| X | StringTie | exon      | 110810174 | 110810354 | . | + | . | transcript_MSTRG.43950. | lgene_id | MSTRG.43950; |
| X | StringTie | exon      | 110810392 | 110810447 | . | + | . | transcript_MSTRG.43950. | lgene_id | MSTRG.43950; |
| X | StringTie | exon      | 110833318 | 110834078 | . | + | . | transcript_MSTRG.43950. | lgene_id | MSTRG.43950; |
| X | StringTie | transcrip | 110960325 | 110962267 | . | + | . | transcript_MSTRG.43965. | lgene_id | MSTRG.43965; |
| X | StringTie | exon      | 110960325 | 110960421 | . | + | . | transcript_MSTRG.43965. | lgene_id | MSTRG.43965; |
| X | StringTie | exon      | 110961195 | 110961322 | . | + | . | transcript_MSTRG.43965. | lgene_id | MSTRG.43965; |
| X | StringTie | exon      | 110961935 | 110962267 | . | + | . | transcript_MSTRG.43965. | lgene_id | MSTRG.43965; |
| X | StringTie | transcrip | 114575759 | 115016866 | . | + | . | transcript_MSTRG.43999. | lgene_id | MSTRG.43999; |
| X | StringTie | exon      | 114575759 | 114576101 | . | + | . | transcript_MSTRG.43999. | lgene_id | MSTRG.43999; |
| X | StringTie | exon      | 114868858 | 114868937 | . | + | . | transcript_MSTRG.43999. | lgene_id | MSTRG.43999; |
| X | StringTie | exon      | 115016586 | 115016866 | . | + | . | transcript_MSTRG.43999. | lgene_id | MSTRG.43999; |
| X | StringTie | transcrip | 122517978 | 122521952 | . | + | . | transcript_MSTRG.44070. | lgene_id | MSTRG.44070; |
| X | StringTie | exon      | 122517978 | 122518220 | . | + | . | transcript_MSTRG.44070. | lgene_id | MSTRG.44070; |
| X | StringTie | exon      | 122521848 | 122521952 | . | + | . | transcript_MSTRG.44070. | lgene_id | MSTRG.44070; |
| X | StringTie | transcrip | 106463    | 107581    | . | - | . | transcript_MSTRG.42372. | lgene_id | MSTRG.42372; |
| X | StringTie | exon      | 106463    | 107312    | . | - | . | transcript_MSTRG.42372. | lgene_id | MSTRG.42372; |
| X | StringTie | exon      | 107359    | 107581    | . | - | . | transcript_MSTRG.42372. | lgene_id | MSTRG.42372; |
| X | StringTie | transcrip | 113393    | 115663    | . | - | . | transcript_MSTRG.42378. | lgene_id | MSTRG.42378; |
| X | StringTie | exon      | 113393    | 113467    | . | - | . | transcript_MSTRG.42378. | lgene_id | MSTRG.42378; |
| X | StringTie | exon      | 113618    | 115663    | . | - | . | transcript_MSTRG.42378. | lgene_id | MSTRG.42378; |
| X | StringTie | transcrip | 6929828   | 6930070   | . | - | . | transcript_MSTRG.42424. | lgene_id | MSTRG.42424; |
| X | StringTie | exon      | 6929828   | 6929925   | . | - | . | transcript_MSTRG.42424. | lgene_id | MSTRG.42424; |
| X | StringTie | exon      | 6929963   | 6930070   | . | - | . | transcript_MSTRG.42424. | lgene_id | MSTRG.42424; |
| X | StringTie | transcrip | 17793666  | 17829024  | . | - | . | transcript_MSTRG.42569. | lgene_id | MSTRG.42569; |
| X | StringTie | exon      | 17793666  | 17793693  | . | - | . | transcript_MSTRG.42569. | lgene_id | MSTRG.42569; |
| X | StringTie | exon      | 17794077  | 17794472  | . | - | . | transcript_MSTRG.42569. | lgene_id | MSTRG.42569; |
| X | StringTie | exon      | 17828753  | 17828888  | . | - | . | transcript_MSTRG.42569. | lgene_id | MSTRG.42569; |
| X | StringTie | exon      | 17828998  | 17829024  | . | - | . | transcript_MSTRG.42569. | lgene_id | MSTRG.42569; |
| X | StringTie | transcrip | 17845536  | 17862340  | . | - | . | transcript_MSTRG.42571. | lgene_id | MSTRG.42571; |
| X | StringTie | exon      | 17845536  | 17846263  | . | - | . | transcript_MSTRG.42571. | lgene_id | MSTRG.42571; |
| X | StringTie | exon      | 17862290  | 17862340  | . | - | . | transcript_MSTRG.42571. | lgene_id | MSTRG.42571; |
| X | StringTie | transcrip | 22068981  | 22069290  | . | - | . | transcript_MSTRG.42621. | lgene_id | MSTRG.42621; |

|   |                      |          |          |   |   |   |                                 |              |
|---|----------------------|----------|----------|---|---|---|---------------------------------|--------------|
| X | StringTie exon       | 22068981 | 22069092 | . | - | . | transcript_MSTRG.42621.lgene_id | MSTRG.42621; |
| X | StringTie exon       | 22069177 | 22069290 | . | - | . | transcript_MSTRG.42621.lgene_id | MSTRG.42621; |
| X | StringTie transcript | 33051723 | 33058725 | . | - | . | transcript_MSTRG.42706.lgene_id | MSTRG.42706; |
| X | StringTie exon       | 33051723 | 33052505 | . | - | . | transcript_MSTRG.42706.lgene_id | MSTRG.42706; |
| X | StringTie exon       | 33058611 | 33058725 | . | - | . | transcript_MSTRG.42706.lgene_id | MSTRG.42706; |
| X | StringTie transcript | 33052193 | 33058725 | . | - | . | transcript_MSTRG.42706.lgene_id | MSTRG.42706; |
| X | StringTie exon       | 33052193 | 33052505 | . | - | . | transcript_MSTRG.42706.lgene_id | MSTRG.42706; |
| X | StringTie exon       | 33055312 | 33055460 | . | - | . | transcript_MSTRG.42706.lgene_id | MSTRG.42706; |
| X | StringTie exon       | 33058611 | 33058725 | . | - | . | transcript_MSTRG.42706.lgene_id | MSTRG.42706; |
| X | StringTie transcript | 34317938 | 34516499 | . | - | . | transcript_MSTRG.42728.lgene_id | MSTRG.42728; |
| X | StringTie exon       | 34317938 | 34318077 | . | - | . | transcript_MSTRG.42728.lgene_id | MSTRG.42728; |
| X | StringTie exon       | 34516411 | 34516499 | . | - | . | transcript_MSTRG.42728.lgene_id | MSTRG.42728; |
| X | StringTie transcript | 35099720 | 35108595 | . | - | . | transcript_MSTRG.42726.lgene_id | MSTRG.42726; |
| X | StringTie exon       | 35099720 | 35099903 | . | - | . | transcript_MSTRG.42726.lgene_id | MSTRG.42726; |
| X | StringTie exon       | 35108572 | 35108595 | . | - | . | transcript_MSTRG.42726.lgene_id | MSTRG.42726; |
| X | StringTie transcript | 36919670 | 36929089 | . | - | . | transcript_MSTRG.42739.lgene_id | MSTRG.42739; |
| X | StringTie exon       | 36919670 | 36919826 | . | - | . | transcript_MSTRG.42739.lgene_id | MSTRG.42739; |
| X | StringTie exon       | 36926805 | 36926886 | . | - | . | transcript_MSTRG.42739.lgene_id | MSTRG.42739; |
| X | StringTie exon       | 36928945 | 36929089 | . | - | . | transcript_MSTRG.42739.lgene_id | MSTRG.42739; |
| X | StringTie transcript | 38253314 | 38273269 | . | - | . | transcript_MSTRG.42746.lgene_id | MSTRG.42746; |
| X | StringTie exon       | 38253314 | 38260108 | . | - | . | transcript_MSTRG.42746.lgene_id | MSTRG.42746; |
| X | StringTie exon       | 38273038 | 38273269 | . | - | . | transcript_MSTRG.42746.lgene_id | MSTRG.42746; |
| X | StringTie transcript | 38255989 | 38273249 | . | - | . | transcript_MSTRG.42746.lgene_id | MSTRG.42746; |
| X | StringTie exon       | 38255989 | 38260108 | . | - | . | transcript_MSTRG.42746.lgene_id | MSTRG.42746; |
| X | StringTie exon       | 38262964 | 38263046 | . | - | . | transcript_MSTRG.42746.lgene_id | MSTRG.42746; |
| X | StringTie exon       | 38273038 | 38273249 | . | - | . | transcript_MSTRG.42746.lgene_id | MSTRG.42746; |
| X | StringTie transcript | 38256951 | 38266306 | . | - | . | transcript_MSTRG.42746.lgene_id | MSTRG.42746; |
| X | StringTie exon       | 38256951 | 38260108 | . | - | . | transcript_MSTRG.42746.lgene_id | MSTRG.42746; |
| X | StringTie exon       | 38262964 | 38263046 | . | - | . | transcript_MSTRG.42746.lgene_id | MSTRG.42746; |
| X | StringTie exon       | 38265995 | 38266306 | . | - | . | transcript_MSTRG.42746.lgene_id | MSTRG.42746; |
| X | StringTie transcript | 45721669 | 45757912 | . | - | . | transcript_MSTRG.42888.lgene_id | MSTRG.42888; |
| X | StringTie exon       | 45721669 | 45721695 | . | - | . | transcript_MSTRG.42888.lgene_id | MSTRG.42888; |
| X | StringTie exon       | 45755450 | 45755527 | . | - | . | transcript_MSTRG.42888.lgene_id | MSTRG.42888; |
| X | StringTie exon       | 45757655 | 45757912 | . | - | . | transcript_MSTRG.42888.lgene_id | MSTRG.42888; |
| X | StringTie transcript | 59326048 | 59368990 | . | - | . | transcript_MSTRG.43295.lgene_id | MSTRG.43295; |

|   |                      |          |          |   |   |   |                                 |              |
|---|----------------------|----------|----------|---|---|---|---------------------------------|--------------|
| X | StringTie exon       | 59326048 | 59326066 | . | - | . | transcript_MSTRG.43295.lgene_id | MSTRG.43295; |
| X | StringTie exon       | 59368329 | 59368990 | . | - | . | transcript_MSTRG.43295.lgene_id | MSTRG.43295; |
| X | StringTie transcript | 59475708 | 59484479 | . | - | . | transcript_MSTRG.43297.lgene_id | MSTRG.43297; |
| X | StringTie exon       | 59475708 | 59475782 | . | - | . | transcript_MSTRG.43297.lgene_id | MSTRG.43297; |
| X | StringTie exon       | 59476476 | 59476545 | . | - | . | transcript_MSTRG.43297.lgene_id | MSTRG.43297; |
| X | StringTie exon       | 59484252 | 59484479 | . | - | . | transcript_MSTRG.43297.lgene_id | MSTRG.43297; |
| X | StringTie transcript | 64700247 | 64701792 | . | - | . | transcript_MSTRG.43413.lgene_id | MSTRG.43413; |
| X | StringTie exon       | 64700247 | 64700329 | . | - | . | transcript_MSTRG.43413.lgene_id | MSTRG.43413; |
| X | StringTie exon       | 64700892 | 64701792 | . | - | . | transcript_MSTRG.43413.lgene_id | MSTRG.43413; |
| X | StringTie transcript | 78360516 | 78539976 | . | - | . | transcript_MSTRG.43545.lgene_id | MSTRG.43545; |
| X | StringTie exon       | 78360516 | 78360916 | . | - | . | transcript_MSTRG.43545.lgene_id | MSTRG.43545; |
| X | StringTie exon       | 78539834 | 78539976 | . | - | . | transcript_MSTRG.43545.lgene_id | MSTRG.43545; |
| X | StringTie transcript | 84903304 | 84922540 | . | - | . | transcript_MSTRG.43677.lgene_id | MSTRG.43677; |
| X | StringTie exon       | 84903304 | 84903590 | . | - | . | transcript_MSTRG.43677.lgene_id | MSTRG.43677; |
| X | StringTie exon       | 84909691 | 84909912 | . | - | . | transcript_MSTRG.43677.lgene_id | MSTRG.43677; |
| X | StringTie exon       | 84922436 | 84922540 | . | - | . | transcript_MSTRG.43677.lgene_id | MSTRG.43677; |
| X | StringTie transcript | 84903304 | 84922540 | . | - | . | transcript_MSTRG.43677.lgene_id | MSTRG.43677; |
| X | StringTie exon       | 84903304 | 84903590 | . | - | . | transcript_MSTRG.43677.lgene_id | MSTRG.43677; |
| X | StringTie exon       | 84918739 | 84918910 | . | - | . | transcript_MSTRG.43677.lgene_id | MSTRG.43677; |
| X | StringTie exon       | 84922390 | 84922540 | . | - | . | transcript_MSTRG.43677.lgene_id | MSTRG.43677; |
| X | StringTie transcript | 84903304 | 84922586 | . | - | . | transcript_MSTRG.43677.lgene_id | MSTRG.43677; |
| X | StringTie exon       | 84903304 | 84903590 | . | - | . | transcript_MSTRG.43677.lgene_id | MSTRG.43677; |
| X | StringTie exon       | 84922436 | 84922586 | . | - | . | transcript_MSTRG.43677.lgene_id | MSTRG.43677; |
| X | StringTie transcript | 84903304 | 84922586 | . | - | . | transcript_MSTRG.43677.lgene_id | MSTRG.43677; |
| X | StringTie exon       | 84903304 | 84903590 | . | - | . | transcript_MSTRG.43677.lgene_id | MSTRG.43677; |
| X | StringTie exon       | 84922390 | 84922586 | . | - | . | transcript_MSTRG.43677.lgene_id | MSTRG.43677; |
| X | StringTie transcript | 84903305 | 84922540 | . | - | . | transcript_MSTRG.43677.lgene_id | MSTRG.43677; |
| X | StringTie exon       | 84903305 | 84903590 | . | - | . | transcript_MSTRG.43677.lgene_id | MSTRG.43677; |
| X | StringTie exon       | 84911734 | 84911797 | . | - | . | transcript_MSTRG.43677.lgene_id | MSTRG.43677; |
| X | StringTie exon       | 84922390 | 84922540 | . | - | . | transcript_MSTRG.43677.lgene_id | MSTRG.43677; |
| X | StringTie transcript | 84903305 | 84922694 | . | - | . | transcript_MSTRG.43677.lgene_id | MSTRG.43677; |
| X | StringTie exon       | 84903305 | 84903590 | . | - | . | transcript_MSTRG.43677.lgene_id | MSTRG.43677; |
| X | StringTie exon       | 84909691 | 84909912 | . | - | . | transcript_MSTRG.43677.lgene_id | MSTRG.43677; |
| X | StringTie exon       | 84922390 | 84922694 | . | - | . | transcript_MSTRG.43677.lgene_id | MSTRG.43677; |
| X | StringTie transcript | 84903306 | 84922538 | . | - | . | transcript_MSTRG.43677.lgene_id | MSTRG.43677; |

|   |                      |           |           |   |   |   |                                 |              |
|---|----------------------|-----------|-----------|---|---|---|---------------------------------|--------------|
| X | StringTie exon       | 84903306  | 84903590  | . | - | . | transcript_MSTRG.43677.1gene_id | MSTRG.43677; |
| X | StringTie exon       | 84909691  | 84909912  | . | - | . | transcript_MSTRG.43677.1gene_id | MSTRG.43677; |
| X | StringTie exon       | 84911734  | 84911797  | . | - | . | transcript_MSTRG.43677.1gene_id | MSTRG.43677; |
| X | StringTie exon       | 84918739  | 84918910  | . | - | . | transcript_MSTRG.43677.1gene_id | MSTRG.43677; |
| X | StringTie exon       | 84922390  | 84922538  | . | - | . | transcript_MSTRG.43677.1gene_id | MSTRG.43677; |
| X | StringTie transcript | 84903306  | 84922544  | . | - | . | transcript_MSTRG.43677.1gene_id | MSTRG.43677; |
| X | StringTie exon       | 84903306  | 84903590  | . | - | . | transcript_MSTRG.43677.1gene_id | MSTRG.43677; |
| X | StringTie exon       | 84918739  | 84918910  | . | - | . | transcript_MSTRG.43677.1gene_id | MSTRG.43677; |
| X | StringTie exon       | 84922436  | 84922544  | . | - | . | transcript_MSTRG.43677.1gene_id | MSTRG.43677; |
| X | StringTie transcript | 84903316  | 84922536  | . | - | . | transcript_MSTRG.43677.1gene_id | MSTRG.43677; |
| X | StringTie exon       | 84903316  | 84903590  | . | - | . | transcript_MSTRG.43677.1gene_id | MSTRG.43677; |
| X | StringTie exon       | 84911734  | 84911797  | . | - | . | transcript_MSTRG.43677.1gene_id | MSTRG.43677; |
| X | StringTie exon       | 84918739  | 84918910  | . | - | . | transcript_MSTRG.43677.1gene_id | MSTRG.43677; |
| X | StringTie exon       | 84922390  | 84922536  | . | - | . | transcript_MSTRG.43677.1gene_id | MSTRG.43677; |
| X | StringTie transcript | 87401251  | 87401779  | . | - | . | transcript_MSTRG.43699.1gene_id | MSTRG.43699; |
| X | StringTie exon       | 87401251  | 87401646  | . | - | . | transcript_MSTRG.43699.1gene_id | MSTRG.43699; |
| X | StringTie exon       | 87401756  | 87401779  | . | - | . | transcript_MSTRG.43699.1gene_id | MSTRG.43699; |
| X | StringTie transcript | 94864973  | 94947055  | . | - | . | transcript_MSTRG.43769.1gene_id | MSTRG.43769; |
| X | StringTie exon       | 94864973  | 94864999  | . | - | . | transcript_MSTRG.43769.1gene_id | MSTRG.43769; |
| X | StringTie exon       | 94946663  | 94947055  | . | - | . | transcript_MSTRG.43769.1gene_id | MSTRG.43769; |
| X | StringTie transcript | 98390553  | 98397208  | . | - | . | transcript_MSTRG.43819.1gene_id | MSTRG.43819; |
| X | StringTie exon       | 98390553  | 98390784  | . | - | . | transcript_MSTRG.43819.1gene_id | MSTRG.43819; |
| X | StringTie exon       | 98393822  | 98393919  | . | - | . | transcript_MSTRG.43819.1gene_id | MSTRG.43819; |
| X | StringTie exon       | 98396759  | 98397208  | . | - | . | transcript_MSTRG.43819.1gene_id | MSTRG.43819; |
| X | StringTie transcript | 111367233 | 111367765 | . | - | . | transcript_MSTRG.43971.1gene_id | MSTRG.43971; |
| X | StringTie exon       | 111367233 | 111367343 | . | - | . | transcript_MSTRG.43971.1gene_id | MSTRG.43971; |
| X | StringTie exon       | 111367364 | 111367505 | . | - | . | transcript_MSTRG.43971.1gene_id | MSTRG.43971; |
| X | StringTie exon       | 111367680 | 111367765 | . | - | . | transcript_MSTRG.43971.1gene_id | MSTRG.43971; |
| X | StringTie transcript | 124949459 | 124952307 | . | - | . | transcript_MSTRG.44122.1gene_id | MSTRG.44122; |
| X | StringTie exon       | 124949459 | 124950075 | . | - | . | transcript_MSTRG.44122.1gene_id | MSTRG.44122; |
| X | StringTie exon       | 124951979 | 124952307 | . | - | . | transcript_MSTRG.44122.1gene_id | MSTRG.44122; |
| Y | StringTie transcript | 3370143   | 3383785   | . | + | . | transcript_MSTRG.44187.1gene_id | MSTRG.44187; |
| Y | StringTie exon       | 3370143   | 3370621   | . | + | . | transcript_MSTRG.44187.1gene_id | MSTRG.44187; |
| Y | StringTie exon       | 3383705   | 3383785   | . | + | . | transcript_MSTRG.44187.1gene_id | MSTRG.44187; |
| Y | StringTie transcript | 24407834  | 24408619  | . | + | . | transcript_MSTRG.44262.1gene_id | MSTRG.44262; |



|   |                     |          |          |   |   |   |                                 |              |
|---|---------------------|----------|----------|---|---|---|---------------------------------|--------------|
| Y | StringTie exon      | 24407834 | 24408156 | . | + | . | transcript_MSTRG.44262.lgene_id | MSTRG.44262; |
| Y | StringTie exon      | 24408539 | 24408619 | . | + | . | transcript_MSTRG.44262.lgene_id | MSTRG.44262; |
| Y | StringTie transcrip | 10380556 | 10385519 | . | - | . | transcript_MSTRG.44275.lgene_id | MSTRG.44275; |
| Y | StringTie exon      | 10380556 | 10380851 | . | - | . | transcript_MSTRG.44275.lgene_id | MSTRG.44275; |
| Y | StringTie exon      | 10381060 | 10381212 | . | - | . | transcript_MSTRG.44275.lgene_id | MSTRG.44275; |
| Y | StringTie exon      | 10383056 | 10383144 | . | - | . | transcript_MSTRG.44275.lgene_id | MSTRG.44275; |
| Y | StringTie exon      | 10385415 | 10385519 | . | - | . | transcript_MSTRG.44275.lgene_id | MSTRG.44275; |
| Y | StringTie transcrip | 10380601 | 10385508 | . | - | . | transcript_MSTRG.44275.lgene_id | MSTRG.44275; |
| Y | StringTie exon      | 10380601 | 10380846 | . | - | . | transcript_MSTRG.44275.lgene_id | MSTRG.44275; |
| Y | StringTie exon      | 10381060 | 10381212 | . | - | . | transcript_MSTRG.44275.lgene_id | MSTRG.44275; |
| Y | StringTie exon      | 10383056 | 10383144 | . | - | . | transcript_MSTRG.44275.lgene_id | MSTRG.44275; |
| Y | StringTie exon      | 10385415 | 10385508 | . | - | . | transcript_MSTRG.44275.lgene_id | MSTRG.44275; |
| Y | StringTie transcrip | 25247074 | 25262224 | . | - | . | transcript_MSTRG.44267.lgene_id | MSTRG.44267; |
| Y | StringTie exon      | 25247074 | 25247274 | . | - | . | transcript_MSTRG.44267.lgene_id | MSTRG.44267; |
| Y | StringTie exon      | 25262118 | 25262224 | . | - | . | transcript_MSTRG.44267.lgene_id | MSTRG.44267; |

Table S3. The list of differentially expressed lncRNAs between Tibetan and Yorkshire group.

| Row.names   | baseMean    | log2FoldChange | pvalue   | padj     | TA249    | TA251    | TA253    | YA273    | YA302    | YA338    |
|-------------|-------------|----------------|----------|----------|----------|----------|----------|----------|----------|----------|
| MSTRG.42621 | 42945.17246 | 9.054355962    | 4.6E-171 | 5.7E-168 | 81719.24 | 80252.22 | 95215.76 | 131.7094 | 212.9192 | 139.1747 |
| MSTRG.6486  | 599.3038534 | 5.009726177    | 1.32E-22 | 8.27E-20 | 849.8736 | 638.7772 | 1998.881 | 46.91022 | 42.76583 | 18.61572 |
| MSTRG.35541 | 163.3573401 | 6.905038888    | 4.42E-22 | 1.84E-19 | 176.5438 | 386.3823 | 409.0833 | 6.314837 | 1.819822 | 0        |
| MSTRG.7083  | 112.8347174 | 7.222282327    | 1.02E-18 | 3.2E-16  | 299.7139 | 143.3354 | 229.433  | 0        | 3.639645 | 0.886463 |
| MSTRG.22266 | 419.3128747 | -3.912765599   | 1.15E-16 | 2.87E-14 | 39.00386 | 29.08254 | 88.74294 | 541.2717 | 811.6408 | 1006.135 |
| MSTRG.29167 | 237.8656796 | 3.414259064    | 1.65E-12 | 3.43E-10 | 579.9258 | 185.9205 | 538.951  | 36.9869  | 46.40547 | 39.00437 |
| MSTRG.31613 | 734.7886528 | 2.072215317    | 1.29E-11 | 2.3E-09  | 1268.652 | 1061.513 | 1231.579 | 317.5461 | 283.8923 | 245.5502 |
| MSTRG.34932 | 433.293014  | 2.838509343    | 1.47E-10 | 2.3E-08  | 1094.161 | 475.7072 | 711.0258 | 144.3391 | 64.6037  | 109.9214 |
| MSTRG.26887 | 49.92186349 | -3.984085754   | 1.92E-10 | 2.66E-08 | 4.105669 | 9.347959 | 4.328924 | 92.91831 | 103.7299 | 85.10044 |
| MSTRG.44267 | 50.61604049 | 9.257506019    | 2.44E-10 | 3.05E-08 | 176.5438 | 116.3302 | 10.82231 | 0        | 0        | 0        |
| MSTRG.14578 | 220.6957944 | 3.756557799    | 3.99E-10 | 4.25E-08 | 537.8427 | 277.3228 | 417.7412 | 8.119076 | 61.87396 | 21.27511 |
| MSTRG.26349 | 33.86186153 | -8.45550637    | 4.09E-10 | 4.25E-08 | 0        | 0        | 0        | 41.4975  | 81.89201 | 79.78166 |
| MSTRG.20146 | 30.79061575 | -8.318181086   | 7.39E-10 | 7.1E-08  | 0        | 0        | 0        | 65.85472 | 72.7929  | 46.09607 |
| MSTRG.13220 | 199.5567015 | -2.650004437   | 2.39E-09 | 2.13E-07 | 41.05669 | 74.78367 | 48.70039 | 227.3341 | 331.2077 | 474.2576 |
| MSTRG.37120 | 114.4454127 | 4.941691919    | 2.57E-09 | 2.14E-07 | 468.0463 | 154.7606 | 42.20701 | 15.33603 | 4.549556 | 1.772926 |
| MSTRG.34839 | 388.2575829 | -3.493351942   | 1.53E-08 | 1.19E-06 | 17.44909 | 63.35839 | 109.3053 | 687.4151 | 1169.236 | 282.7817 |
| MSTRG.42120 | 228.5895817 | 2.637706599    | 1.39E-07 | 1.02E-05 | 453.6765 | 163.0699 | 564.9246 | 45.10598 | 79.16228 | 65.59825 |
| MSTRG.41778 | 29.11435743 | -5.775785121   | 1.53E-07 | 1.06E-05 | 2.052835 | 1.038662 | 0        | 43.30174 | 93.72086 | 34.57205 |
| MSTRG.26210 | 373.6143697 | 3.45017405     | 2.48E-07 | 1.63E-05 | 914.5378 | 858.9735 | 280.2978 | 9.923315 | 60.05414 | 117.8996 |
| MSTRG.36741 | 296.6356346 | 3.964892869    | 2.91E-07 | 1.82E-05 | 333.5856 | 118.4075 | 1220.757 | 28.86782 | 7.27929  | 70.91703 |
| MSTRG.20839 | 205.4386972 | 2.1184202      | 3.12E-07 | 1.86E-05 | 415.699  | 293.9414 | 292.2024 | 58.63777 | 110.0993 | 62.0524  |
| MSTRG.9698  | 19.81434496 | 7.903055922    | 6.4E-07  | 3.63E-05 | 16.42268 | 8.309296 | 94.1541  | 0        | 0        | 0        |
| MSTRG.7015  | 53.18766218 | 3.1879084      | 7.56E-07 | 4.11E-05 | 161.1475 | 57.12641 | 69.26278 | 10.82543 | 14.55858 | 6.20524  |
| MSTRG.36786 | 31.5698236  | 5.352640508    | 1.19E-06 | 6.21E-05 | 47.2152  | 20.77324 | 116.8809 | 0        | 4.549556 | 0        |
| MSTRG.18750 | 15.61813073 | -7.338925796   | 1.38E-06 | 6.89E-05 | 0        | 0        | 0        | 11.72755 | 50.95503 | 31.0262  |
| MSTRG.27122 | 19.56135232 | 6.913390526    | 1.84E-06 | 8.82E-05 | 42.08311 | 58.16508 | 16.23346 | 0        | 0        | 0.886463 |
| MSTRG.24516 | 47.08883713 | 4.789588625    | 2.21E-06 | 0.000102 | 176.5438 | 4.154648 | 91.98963 | 2.706359 | 1.819822 | 5.318777 |
| MSTRG.3404  | 38.58398736 | 2.977338571    | 2.56E-06 | 0.000114 | 71.84921 | 40.50782 | 93.07186 | 9.021195 | 8.189201 | 8.864629 |
| MSTRG.18486 | 72.17159823 | 2.241740467    | 3.67E-06 | 0.000158 | 94.4304  | 101.7889 | 161.2524 | 27.96571 | 23.65769 | 23.9345  |
| MSTRG.22154 | 181.2614254 | 2.0519654      | 4.64E-06 | 0.000193 | 232.9967 | 454.934  | 188.3082 | 61.34413 | 75.52263 | 74.46288 |
| MSTRG.8034  | 121.759659  | 3.365675584    | 5E-06    | 0.000201 | 29.7661  | 183.8432 | 452.3726 | 16.23815 | 18.19822 | 30.13974 |
| MSTRG.34838 | 477.9972341 | -2.383949155   | 6.03E-06 | 0.000235 | 157.0419 | 128.7941 | 175.3214 | 416.7792 | 410.37   | 1579.677 |
| MSTRG.40446 | 68.83445952 | -2.307587407   | 7.62E-06 | 0.000285 | 12.31701 | 31.15986 | 25.97354 | 124.4925 | 107.3695 | 111.6943 |

|              |              |               |           |           |           |           |           |           |           |           |
|--------------|--------------|---------------|-----------|-----------|-----------|-----------|-----------|-----------|-----------|-----------|
| MSTRG. 42745 | 11. 77361858 | 7. 152633754  | 7. 76E-06 | 0. 000285 | 28. 73969 | 7. 270634 | 34. 63139 | 0         | 0         | 0         |
| MSTRG. 49    | 24. 9495356  | 4. 743336113  | 8. 25E-06 | 0. 000294 | 16. 42268 | 98. 6729  | 29. 22024 | 3. 608478 | 0         | 1. 772926 |
| MSTRG. 14097 | 44619. 70867 | 1. 810883234  | 8. 7E-06  | 0. 000302 | 90868. 73 | 45201. 53 | 72268. 14 | 13751. 91 | 29580. 3  | 16047. 64 |
| MSTRG. 42256 | 322. 8327769 | 2. 276057766  | 1. 51E-05 | 0. 000511 | 666. 1449 | 180. 7272 | 758. 6439 | 77. 58228 | 151. 9552 | 101. 9432 |
| MSTRG. 23445 | 10265. 9626  | 1. 601740364  | 1. 6E-05  | 0. 000524 | 15663. 13 | 9043. 631 | 21624. 06 | 5037. 435 | 4797. 052 | 5430. 472 |
| MSTRG. 10082 | 321. 7594389 | -2. 473008681 | 1. 78E-05 | 0. 000571 | 112. 9059 | 105. 9435 | 75. 75617 | 140. 7306 | 988. 1636 | 507. 0568 |
| MSTRG. 7741  | 9. 794036737 | 6. 887417593  | 2. 65E-05 | 0. 000828 | 8. 211339 | 33. 23719 | 17. 3157  | 0         | 0         | 0         |
| MSTRG. 23649 | 65. 31461186 | 2. 512278061  | 2. 74E-05 | 0. 000834 | 188. 8608 | 88. 28628 | 56. 27601 | 13. 53179 | 23. 65769 | 21. 27511 |
| MSTRG. 23416 | 2127. 711921 | -1. 302586966 | 3. 45E-05 | 0. 001027 | 1218. 357 | 1057. 358 | 1406. 9   | 2540. 369 | 2832. 554 | 3710. 734 |
| MSTRG. 39076 | 297. 0799804 | -2. 691315244 | 3. 68E-05 | 0. 001068 | 130. 355  | 16. 61859 | 91. 98963 | 890. 392  | 439. 4871 | 213. 6376 |
| MSTRG. 3410  | 104. 3445503 | -1. 970812141 | 4. 16E-05 | 0. 001154 | 43. 10953 | 60. 2424  | 23. 80908 | 198. 4663 | 169. 2435 | 131. 1965 |
| MSTRG. 42049 | 52. 26769529 | 2. 327868076  | 4. 15E-05 | 0. 001154 | 125. 2229 | 52. 97177 | 83. 33179 | 18. 04239 | 13. 64867 | 20. 38865 |
| MSTRG. 12355 | 24. 45076857 | 5. 317398009  | 4. 29E-05 | 0. 001164 | 108. 8002 | 33. 23719 | 1. 082231 | 0. 90212  | 0. 909911 | 1. 772926 |
| MSTRG. 42165 | 54. 56877017 | 2. 316192717  | 5. 47E-05 | 0. 001453 | 71. 84921 | 140. 2194 | 60. 60494 | 18. 04239 | 13. 64867 | 23. 04803 |
| MSTRG. 42167 | 20. 10805223 | 6. 039735909  | 8. 89E-05 | 0. 002265 | 55. 42654 | 62. 31972 | 1. 082231 | 0         | 1. 819822 | 0         |
| MSTRG. 42706 | 49. 4418572  | 2. 693390577  | 8. 75E-05 | 0. 002265 | 139. 5928 | 67. 51303 | 49. 78263 | 7. 216956 | 24. 5676  | 7. 978166 |
| MSTRG. 15651 | 53. 15523755 | -2. 663097764 | 9. 16E-05 | 0. 002289 | 10. 26417 | 5. 19331  | 28. 13801 | 105. 548  | 52. 77485 | 117. 0131 |
| MSTRG. 7074  | 1558. 711708 | 1. 951722061  | 0. 000108 | 0. 002647 | 3393. 336 | 745. 7594 | 3292. 147 | 520. 523  | 787. 0732 | 613. 4323 |
| MSTRG. 5473  | 7066. 494479 | 2. 043846249  | 0. 000164 | 0. 003938 | 12135. 33 | 2929. 027 | 19059. 17 | 3041. 045 | 1885. 336 | 3349. 057 |
| MSTRG. 5836  | 14. 36328735 | -4. 292065597 | 0. 000175 | 0. 004116 | 2. 052835 | 1. 038662 | 1. 082231 | 48. 71445 | 19. 10814 | 14. 18341 |
| MSTRG. 37750 | 28. 8116675  | 2. 880937297  | 0. 000253 | 0. 005859 | 18. 47551 | 88. 28628 | 45. 4537  | 4. 510598 | 7. 27929  | 8. 864629 |
| MSTRG. 30986 | 105. 8511399 | 1. 412262679  | 0. 000361 | 0. 008194 | 157. 0419 | 142. 2967 | 162. 3346 | 54. 12717 | 54. 59467 | 64. 71179 |
| MSTRG. 12543 | 170. 8781112 | 1. 397262218  | 0. 000375 | 0. 008362 | 264. 8157 | 207. 7324 | 270. 5577 | 91. 11407 | 121. 0182 | 70. 03057 |
| MSTRG. 1016  | 11. 25608335 | -4. 958563304 | 0. 000393 | 0. 008507 | 0         | 1. 038662 | 1. 082231 | 13. 53179 | 18. 19822 | 33. 68559 |
| MSTRG. 23889 | 30. 23506866 | 2. 351866647  | 0. 000395 | 0. 008507 | 29. 7661  | 60. 2424  | 61. 68717 | 11. 72755 | 10. 00902 | 7. 978166 |
| MSTRG. 13970 | 49. 06057159 | 2. 361597498  | 0. 000412 | 0. 008718 | 74. 92847 | 92. 44092 | 79. 00286 | 13. 53179 | 30. 02707 | 4. 432314 |
| MSTRG. 1179  | 163. 7790885 | -1. 311066103 | 0. 000436 | 0. 009067 | 74. 92847 | 113. 2142 | 94. 1541  | 228. 2362 | 227. 4778 | 244. 6638 |
| MSTRG. 18342 | 28. 14583876 | 2. 840551348  | 0. 000452 | 0. 009245 | 69. 79638 | 14. 54127 | 63. 85163 | 3. 608478 | 9. 099112 | 7. 978166 |
| MSTRG. 30640 | 33. 54505142 | -2. 268861428 | 0. 000464 | 0. 009342 | 10. 26417 | 13. 50261 | 10. 82231 | 52. 32293 | 34. 57663 | 79. 78166 |
| MSTRG. 25441 | 27. 450802   | 2. 470397098  | 0. 000491 | 0. 009736 | 59. 53221 | 54. 01043 | 25. 97354 | 11. 72755 | 6. 369379 | 7. 091703 |

Table S4 The functional enrichment results of up-regulated DEGs using Metascape.

| GroupID   | Category                | Term       | Description                         | LogP     | Log(q-value) | InTerm_InList | Symbols                                                                                                                                                                                                                                                                                                                                                                                                                                        |
|-----------|-------------------------|------------|-------------------------------------|----------|--------------|---------------|------------------------------------------------------------------------------------------------------------------------------------------------------------------------------------------------------------------------------------------------------------------------------------------------------------------------------------------------------------------------------------------------------------------------------------------------|
| 1_Summary | GO Biological Processes | GO:0002274 | myeloid leukocyte activation        | -22.4552 | -18.243      | 53/649        | TSH, CTSS, CTSZ, CYBA, CYBB, FCER1G, GRN, HK3, HMOX1, ITGAX, ITGB2, LGALS3, MAPT, MIF, MMP9, CFP, PLAUR, RELB, S100A8, S100A9, S100A12, SLC2A5, SLC11A1, SLPI, SPI1, SYK, TYROBP, LAT2, CD84, GMFG, CKAP4, PADI2, COTL1, ARHGAP45, CLEC5A, TLR8, ADA2, DOK3, DCSTAMP, PRAM1, NFAM1, ADGRG3, A2M, LGALS3BP, PLEK, STX3, TIMP1, TIMP3, NCS1, FERMT3, SCIN, SCAMP5, ACE, LCP1, MFNG, SEMA4A                                                       |
| 2_Summary | GO Biological Processes | GO:0002573 | myeloid leukocyte differentiation   | -13.8337 | -10.7354     | 24/203        | C1QC, CA2, RUNX1, CD74, CCR1, CSF1, CSF1R, FASN, FCER1G, HCLS1, INPP5D, MMP9, RELB, SPI1, TYROBP, MAFB, TREM2, FAM20C, LRRK1, DCSTAMP, UBASH3B, GAB3, IL34, NRROS, ADAM8, CR2, EGR3, IL7R, LGALS3, MFNG, SYK, VAV1, CD83, SEMA4A, NFAM1, ADGRG3, ALAS2, CSF3R, IRF8, CLEC5A                                                                                                                                                                    |
| 3_Summary | GO Biological Processes | GO:0050900 | leukocyte migration                 | -10.4123 | -7.40421     | 31/486        | ADAM8, ATP1B1, CD48, CD74, CCR1, CSF1, CSF3R, DDT, FCER1G, HMOX1, INPP5D, ITGAX, ITGB2, L1CAM, LGALS3, MIF, MMP9, LGMN, S100A8, S100A9, S100A12, CCL2, CCL3L1, SYK, VAV1, CD84, DOK2, PADI2, SMPD3, P2RY12, CD200R1, CSF1R, EGR2, EGR3, HSPB1, PLAUR, RAP1GAP, ROBO1, STX3, FOSL1, GPNMB, SEMA4A, UNC5A, UNC5D, CYBA, KLKB1                                                                                                                    |
| 4_Summary | KEGG Pathway            | hsa04610   | Complement and coagulation cascades | -9.57241 | -6.66127     | 13/79         | A2M, BDKRB2, C1QA, C1QB, C1QC, C2, CLU, CR2, ITGAX, ITGB2, KLKB1, PLAUR, MASP1, ADAM8, CPM, CTSH, CTSS, CTSZ, ACE, ENO1, CFP, LGMN, RCE1, ACP4, WFS1, DDT, FCER1G, MMP9, NT5E, S100A8, S100A9, S100A12, CCL3L1, SOCS3, CD200R1, METRNL, CD22, CD74, HK1, HMOX1, IL7R, LGALS3, MIF, SYK, VAV1, CD84, PRAM1, HLA-DRA, GNAO1, IRAK1, CCL2, PTGES, SLC11A1, SLPI, CD83, TREM2, CD48, ADGRE1, INPP5D, RELB, TAP1, LAT2, TLR8, SEMA4A, UNC93B1, IRF8 |
| 5_Summary | GO Biological Processes | GO:0001816 | cytokine production                 | -9.34644 | -6.4565      | 37/737        | ADAM8, RUNX1, CD74, CLU, CSF1R, CYBA, CYBB, DDT, FCER1G, HK1, HMOX1, HSPB1, IRF8, INPP5D, IRAK1, MIF, RELB, S100A8, S100A9, S100A12, SLC11A1, SYK, CD84, SPHK1, CD83, HOMER2, LITAF, GPNMB, CLEC5A, TLR8, CD200R1, CCM2L, NFAM1, SCAMP5, TIGIT, RAB7B, NRROS                                                                                                                                                                                   |
| 6_Summary | GO Biological Processes | GO:0002253 | activation of immune response       | -8.30657 | -5.50938     | 33/662        | A2M, ACTG1, C1QA, C1QB, C1QC, C2, RUNX1, CD22, CLU, CR2, CTSS, CYBA, FCER1G, HLA-DRA, INPP5D, IRAK1, ITGB2, LGALS3, CFP, MASP1, RELB, S100A8, S100A9, SYK, VAV1, LAT2, LPXN, TLR8, CLEC7A, UNC93B1, PRAM1, NFAM1, RAB7B, CTSH, CD200R1                                                                                                                                                                                                         |

|           |                         |            |                                       |          |          |        |                                                                                                                                                                                                                                                                                                                                                                                                                                                                         |
|-----------|-------------------------|------------|---------------------------------------|----------|----------|--------|-------------------------------------------------------------------------------------------------------------------------------------------------------------------------------------------------------------------------------------------------------------------------------------------------------------------------------------------------------------------------------------------------------------------------------------------------------------------------|
| 7_Summary | GO Biological Processes | GO:0019221 | cytokine-mediated signaling pathway   | -8.21169 | -5.44581 | 35/739 | RUNX1, CD74, CCR1, CSF1, CSF1R, CSF2RB, CSF3R, FCER1G, IFI6, HLA-DRA, HMOX1, IRF8, IL2RB, IL7R, IL10RA, INPP5D, IRAK1, ITGAX, ITGB2, LCP1, MIF, MMP9, ROBO1, CCL2, CCL3L1, STX3, SYK, TIMP1, VAV1, SPHK1, SOCS3, IFI30, PADI2, TREM2, IL34                                                                                                                                                                                                                              |
| 8_Summary | GO Biological Processes | GO:0030225 | macrophage differentiation            | -7.95823 | -5.20847 | 9/41   | C1QC, CSF1, CSF1R, HCLS1, MMP9, SPI1, GAB3, IL34, NRROS, CD74, FASN, INPP5D, DCSTAMP                                                                                                                                                                                                                                                                                                                                                                                    |
| 9_Summary | GO Biological Processes | GO:0044283 | small molecule biosynthetic process   | -7.86148 | -5.15447 | 35/763 | ACACA, ACLY, AMPD3, ATF3, BCAT1, CD74, DHCR7, ENO1, FASN, HK1, HK3, FADS3, LSS, MIF, NT5E, PFKFB1, PLEK, PSPH, PYCR1, SCD, SREBF2, SYK, SPHK1, PTGES, DHRS9, EBP, SMPDL3A, HAAO, ADA2, ACSS2, MID1IP1, ACS S1, NUDT7, RIMKLA, NAT8L, ALAS2, CYBA, CYBB, GSS, ME1, PDHB, SLC25A39, AHCY, FOLR1, HMOX1, ETHE1, ALDH4A1, ME3, PNPLA3, CYGB, PLIN5, A TP1B1, CKB, CLU, COMT, CTSH, CYP4B1, ITGB2, FAM20C, CHCHD10, TST, C HST1, SPOCK2, ENTPD6, CDS1, TXNRD1, INPP5D, SMPD3 |
| 9_Member  | GO Biological Processes | GO:0044283 | small molecule biosynthetic process   | -7.86148 | -5.15447 | 35/763 | ACACA, ACLY, AMPD3, ATF3, BCAT1, CD74, DHCR7, ENO1, FASN, HK1, HK3, FADS3, LSS, MIF, NT5E, PFKFB1, PLEK, PSPH, PYCR1, SCD, SREBF2, SYK, SPHK1, PTGES, DHRS9, EBP, SMPDL3A, HAAO, ADA2, ACSS2, MID1IP1, ACS S1, NUDT7, RIMKLA, NAT8L                                                                                                                                                                                                                                     |
| 9_Member  | GO Biological Processes | GO:0046394 | carboxylic acid biosynthetic process  | -6.74904 | -4.19009 | 23/415 | ACACA, ACLY, BCAT1, CD74, ENO1, FASN, HK1, HK3, FADS3, MIF, PFKFB1, PSPH, PYCR1, SCD, SYK, PTGES, DHRS9, HAAO, ACSS2, MID1IP1, ACS S1, R IMKLA, NAT8L                                                                                                                                                                                                                                                                                                                   |
| 9_Member  | GO Biological Processes | GO:0016053 | organic acid biosynthetic process     | -6.73049 | -4.18108 | 23/416 | ACACA, ACLY, BCAT1, CD74, ENO1, FASN, HK1, HK3, FADS3, MIF, PFKFB1, PSPH, PYCR1, SCD, SYK, PTGES, DHRS9, HAAO, ACSS2, MID1IP1, ACS S1, R IMKLA, NAT8L                                                                                                                                                                                                                                                                                                                   |
| 9_Member  | GO Biological Processes | GO:0051188 | cofactor biosynthetic process         | -6.21432 | -3.71816 | 18/285 | ACACA, ACLY, ALAS2, CYBA, CYBB, ENO1, FASN, GSS, HK1, HK3, ME1, PDHB, PFKFB1, SCD, HAAO, SLC25A39, ACSS2, ACSS1                                                                                                                                                                                                                                                                                                                                                         |
| 9_Member  | GO Biological Processes | GO:0006084 | acetyl-CoA metabolic process          | -5.84102 | -3.4282  | 7/37   | ACACA, ACLY, FASN, PDHB, ACSS2, ACSS1, NUDT7                                                                                                                                                                                                                                                                                                                                                                                                                            |
| 9_Member  | GO Biological Processes | GO:0051186 | cofactor metabolic process            | -5.56504 | -3.17895 | 25/559 | ACACA, ACLY, AHCY, ALAS2, CYBA, CYBB, ENO1, FASN, FOLR1, GSS, HK1, H K3, HMOX1, ME1, NT5E, PDHB, PFKFB1, SCD, PTGES, ETHE1, HAAO, SLC25A39, ACSS2, ACSS1, NUDT7                                                                                                                                                                                                                                                                                                         |
| 9_Member  | GO Biological Processes | GO:0032787 | monocarboxylic acid metabolic process | -5.10687 | -2.82852 | 25/594 | ACACA, ACLY, CD74, ENO1, FASN, HK1, HK3, FADS3, ME1, MIF, PDHB, PFKF B1, SCD, ALDH4A1, PTGES, DHRS9, ME3, HAAO, ACSS2, MID1IP1, PNPLA3, ACSS1, CYGB, NUDT7, PLIN5                                                                                                                                                                                                                                                                                                       |
| 9_Member  | GO Biological Processes | GO:0035384 | thioester biosynthetic process        | -4.87133 | -2.63229 | 7/51   | ACACA, ACLY, FASN, PDHB, SCD, ACSS2, ACSS1                                                                                                                                                                                                                                                                                                                                                                                                                              |
| 9_Member  | GO Biological Processes | GO:0071616 | acyl-CoA biosynthetic process         | -4.87133 | -2.63229 | 7/51   | ACACA, ACLY, FASN, PDHB, SCD, ACSS2, ACSS1                                                                                                                                                                                                                                                                                                                                                                                                                              |

|          |                         |            |                                                        |          |          |        |                                                                                                                                                                                            |
|----------|-------------------------|------------|--------------------------------------------------------|----------|----------|--------|--------------------------------------------------------------------------------------------------------------------------------------------------------------------------------------------|
| 9_Member | GO Biological Processes | GO:0072330 | monocarboxylic acid biosynthetic process               | -4.75514 | -2.52975 | 16/295 | ACACA, ACLY, CD74, ENO1, FASN, HK1, HK3, FADS3, MIF, PFKFB1, SCD, PTGES, DHRS9, ACSS2, MID1IP1, ACSS1                                                                                      |
| 9_Member | GO Biological Processes | GO:0017144 | drug metabolic process                                 | -4.71388 | -2.49295 | 29/789 | ACLY, AHCY, AMPD3, ATP1B1, CKB, CLU, COMT, CTSH, CYBA, CYBB, CYP4B1, ENO1, FOLR1, HK1, HK3, ITGB2, NT5E, PDHB, PFKFB1, PYCR1, DHRS9, ME3, ETHE1, HAAO, ADA2, ACSS2, FAM20C, ACSS1, CHCHD10 |
| 9_Member | KEGG Pathway            | hsa00620   | Pyruvate metabolism                                    | -4.53919 | -2.35835 | 6/39   | ACACA, ME1, PDHB, ME3, ACSS2, ACSS1                                                                                                                                                        |
| 9_Member | GO Biological Processes | GO:0006633 | fatty acid biosynthetic process                        | -4.43134 | -2.28736 | 11/157 | ACACA, ACLY, CD74, FASN, FADS3, MIF, SCD, PTGES, ACSS2, MID1IP1, ACSS1                                                                                                                     |
| 9_Member | GO Biological Processes | GO:0009108 | coenzyme biosynthetic process                          | -4.32907 | -2.20681 | 13/221 | ACACA, ACLY, ENO1, FASN, HK1, HK3, ME1, PDHB, PFKFB1, SCD, HAAO, ACSS2, ACSS1                                                                                                              |
| 9_Member | GO Biological Processes | GO:0006732 | coenzyme metabolic process                             | -4.23784 | -2.13289 | 17/361 | ACACA, ACLY, AHCY, ENO1, FASN, FOLR1, HK1, HK3, ME1, NT5E, PDHB, PFKFB1, SCD, HAAO, ACSS2, ACSS1, NUDT7                                                                                    |
| 9_Member | GO Biological Processes | GO:0033866 | nucleoside bisphosphate biosynthetic process           | -4.13034 | -2.0487  | 7/66   | ACACA, ACLY, FASN, PDHB, SCD, ACSS2, ACSS1                                                                                                                                                 |
| 9_Member | GO Biological Processes | GO:0034030 | ribonucleoside bisphosphate biosynthetic process       | -4.13034 | -2.0487  | 7/66   | ACACA, ACLY, FASN, PDHB, SCD, ACSS2, ACSS1                                                                                                                                                 |
| 9_Member | GO Biological Processes | GO:0034033 | purine nucleoside bisphosphate biosynthetic process    | -4.13034 | -2.0487  | 7/66   | ACACA, ACLY, FASN, PDHB, SCD, ACSS2, ACSS1                                                                                                                                                 |
| 9_Member | GO Biological Processes | GO:0072522 | purine-containing compound biosynthetic process        | -4.02433 | -1.97353 | 14/270 | ACACA, ACLY, AMPD3, ENO1, FASN, HK1, HK3, NT5E, PDHB, PFKFB1, SCD, ADA2, ACSS2, ACSS1                                                                                                      |
| 9_Member | GO Biological Processes | GO:0006637 | acyl-CoA metabolic process                             | -3.67726 | -1.72517 | 8/103  | ACACA, ACLY, FASN, PDHB, SCD, ACSS2, ACSS1, NUDT7                                                                                                                                          |
| 9_Member | GO Biological Processes | GO:0035383 | thioester metabolic process                            | -3.67726 | -1.72517 | 8/103  | ACACA, ACLY, FASN, PDHB, SCD, ACSS2, ACSS1, NUDT7                                                                                                                                          |
| 9_Member | GO Biological Processes | GO:0006790 | sulfur compound metabolic process                      | -3.65354 | -1.70855 | 16/366 | ACACA, ACLY, AHCY, COMT, FASN, GSS, PDHB, SCD, TST, CHST1, PTGES, SPOCK2, ETHE1, ACSS2, ACSS1, NUDT7                                                                                       |
| 9_Member | GO Biological Processes | GO:0055086 | nucleobase-containing small molecule metabolic process | -3.55667 | -1.63893 | 25/742 | ACACA, ACLY, AHCY, AMPD3, ATP1B1, ENTPD6, CDS1, ENO1, FASN, HK1, HK3, ME1, NT5E, PDHB, PFKFB1, SCD, TXNRD1, SMPDL3A, HAAO, ADA2, ACSS2, FAM20C, ACSS1, NUDT7, CHCHD10                      |

|          |                         |            |                                                  |          |          |        |                                                                                                                               |
|----------|-------------------------|------------|--------------------------------------------------|----------|----------|--------|-------------------------------------------------------------------------------------------------------------------------------|
| 9_Member | GO Biological Processes | GO:0006085 | acetyl-CoA biosynthetic process                  | -3.55224 | -1.63893 | 4/21   | ACLY, PDHB, ACSS2, ACSS1                                                                                                      |
| 9_Member | GO Biological Processes | GO:0009165 | nucleotide biosynthetic process                  | -3.43537 | -1.55689 | 15/345 | ACACA, ACLY, AMPD3, CDS1, ENO1, FASN, HK1, HK3, ME1, PDHB, PFKFB1, SCD, HAAO, ACSS2, ACSS1                                    |
| 9_Member | GO Biological Processes | GO:0009152 | purine ribonucleotide biosynthetic process       | -3.41983 | -1.54811 | 12/238 | ACACA, ACLY, AMPD3, ENO1, FASN, HK1, HK3, PDHB, PFKFB1, SCD, ACSS2, ACSS1                                                     |
| 9_Member | GO Biological Processes | GO:1901293 | nucleoside phosphate biosynthetic process        | -3.39597 | -1.53281 | 15/348 | ACACA, ACLY, AMPD3, CDS1, ENO1, FASN, HK1, HK3, ME1, PDHB, PFKFB1, SCD, HAAO, ACSS2, ACSS1                                    |
| 9_Member | GO Biological Processes | GO:0009260 | ribonucleotide biosynthetic process              | -3.19889 | -1.40003 | 12/252 | ACACA, ACLY, AMPD3, ENO1, FASN, HK1, HK3, PDHB, PFKFB1, SCD, ACSS2, ACSS1                                                     |
| 9_Member | GO Biological Processes | GO:0006164 | purine nucleotide biosynthetic process           | -3.12414 | -1.34655 | 12/257 | ACACA, ACLY, AMPD3, ENO1, FASN, HK1, HK3, PDHB, PFKFB1, SCD, ACSS2, ACSS1                                                     |
| 9_Member | GO Biological Processes | GO:0006631 | fatty acid metabolic process                     | -3.12179 | -1.34579 | 15/370 | ACACA, ACLY, CD74, FASN, FADS3, MIF, SCD, PTGES, ACSS2, MID1IP1, PNPLA3, ACSS1, CYGB, NUDT7, PLIN5                            |
| 9_Member | GO Biological Processes | GO:0046390 | ribose phosphate biosynthetic process            | -3.10944 | -1.33976 | 12/258 | ACACA, ACLY, AMPD3, ENO1, FASN, HK1, HK3, PDHB, PFKFB1, SCD, ACSS2, ACSS1                                                     |
| 9_Member | GO Biological Processes | GO:0072521 | purine-containing compound metabolic process     | -2.87655 | -1.17761 | 19/559 | ACACA, ACLY, AHCY, AMPD3, ATP1B1, ENO1, FASN, HK1, HK3, NT5E, PDHB, PFKFB1, SCD, ADA2, ACSS2, FAM20C, ACSS1, NUDT7, CHCHD10   |
| 9_Member | GO Biological Processes | GO:0033865 | nucleoside bisphosphate metabolic process        | -2.83324 | -1.15137 | 8/138  | ACACA, ACLY, FASN, PDHB, SCD, ACSS2, ACSS1, NUDT7                                                                             |
| 9_Member | GO Biological Processes | GO:0033875 | ribonucleoside bisphosphate metabolic process    | -2.83324 | -1.15137 | 8/138  | ACACA, ACLY, FASN, PDHB, SCD, ACSS2, ACSS1, NUDT7                                                                             |
| 9_Member | GO Biological Processes | GO:0034032 | purine nucleoside bisphosphate metabolic process | -2.83324 | -1.15137 | 8/138  | ACACA, ACLY, FASN, PDHB, SCD, ACSS2, ACSS1, NUDT7                                                                             |
| 9_Member | GO Biological Processes | GO:0006753 | nucleoside phosphate metabolic process           | -2.76833 | -1.10148 | 21/660 | ACACA, ACLY, AMPD3, ATP1B1, ENO1, FASN, HK1, HK3, ME1, PDHB, PFKFB1, SCD, SMPDL3A, HAAO, ACSS2, FAM20C, ACSS1, NUDT7, CHCHD10 |
| 9_Member | GO Biological Processes | GO:0009150 | purine ribonucleotide metabolic process          | -2.73211 | -1.07505 | 17/489 | ACACA, ACLY, AMPD3, ATP1B1, ENO1, FASN, HK1, HK3, NT5E, PDHB, PFKFB1, SCD, ACSS2, FAM20C, ACSS1, NUDT7, CHCHD10               |

|            |                         |            |                                          |          |          |        |                                                                                                                                                                                                                                                                                                                                                                                      |
|------------|-------------------------|------------|------------------------------------------|----------|----------|--------|--------------------------------------------------------------------------------------------------------------------------------------------------------------------------------------------------------------------------------------------------------------------------------------------------------------------------------------------------------------------------------------|
| 9_Member   | GO Biological Processes | GO:0008610 | lipid biosynthetic process               | -2.67142 | -1.02746 | 22/718 | RAC1, ACLE1, CD11, CD31, DHX1, FASN, HNF1B, HNF3B, LGS, MIF, SCD, SREBF2, SPHK1, PTGES, DHRS9, EBP, SMPD3, ACSS2, MID1IP1, PNPLA3, ACSS1, PLIN5                                                                                                                                                                                                                                      |
| 9_Member   | GO Biological Processes | GO:0009259 | ribonucleotide metabolic process         | -2.58749 | -0.97631 | 17/505 | ACACA, ACLY, AMPD3, ATP1B1, ENO1, FASN, HK1, HK3, NT5E, PDHB, PFKFB1, SCD, ACSS2, FAM20C, ACSS1, NUDT7, CHCHD10                                                                                                                                                                                                                                                                      |
| 9_Member   | GO Biological Processes | GO:0044272 | sulfur compound biosynthetic process     | -2.53198 | -0.93996 | 9/189  | ACACA, ACLY, FASN, GSS, PDHB, SCD, CHST1, ACSS2, ACSS1                                                                                                                                                                                                                                                                                                                               |
| 9_Member   | GO Biological Processes | GO:0009117 | nucleotide metabolic process             | -2.46722 | -0.89554 | 20/654 | ACACA, ACLY, AMPD3, ATP1B1, CDS1, ENO1, FASN, HK1, HK3, ME1, NT5E, PDHB, PFKFB1, SCD, HAAO, ACSS2, FAM20C, ACSS1, NUDT7, CHCHD10                                                                                                                                                                                                                                                     |
| 9_Member   | GO Biological Processes | GO:0006163 | purine nucleotide metabolic process      | -2.45044 | -0.88468 | 17/521 | ACACA, ACLY, AMPD3, ATP1B1, ENO1, FASN, HK1, HK3, NT5E, PDHB, PFKFB1, SCD, ACSS2, FAM20C, ACSS1, NUDT7, CHCHD10                                                                                                                                                                                                                                                                      |
| 9_Member   | GO Biological Processes | GO:0019693 | ribose phosphate metabolic process       | -2.42554 | -0.86659 | 17/524 | ACACA, ACLY, AMPD3, ATP1B1, ENO1, FASN, HK1, HK3, NT5E, PDHB, PFKFB1, SCD, ACSS2, FAM20C, ACSS1, NUDT7, CHCHD10                                                                                                                                                                                                                                                                      |
| 10_Summary | GO Biological Processes | GO:0001894 | tissue homeostasis                       | -7.11252 | -4.51314 | 17/221 | ABCA4, ACACA, ACTG1, ADAM8, CA2, CSF1, CSF1R, CTSH, HSPB1, INPP5D, SPP1, SYK, HOMER2, WHRN, LRRK1, DCSTAMP, UBASH3B, ADRB3, AMPD3, SCD, SLC11A1, WFS1, MFN2, METRNL, CST3, GPNMB, ACE, TIMP1, CAPN3, NCS                                                                                                                                                                             |
| 11_Summary | GO Biological Processes | GO:0038156 | interleukin-3-mediated signaling pathway | -6.54454 | -4.01362 | 4/5    | CSF2RB, CSF3R, FCER1G, SYK, HMOX1, ITGB2, CD84, PRAM1, S100A12, LAT2, SREBF2, NCS1, SMPD3, SCAMP5, CD83                                                                                                                                                                                                                                                                              |
| 12_Summary | KEGG Pathway            | hsa04142   | Lysosome                                 | -6.28547 | -3.77228 | 12/123 | CD68, CTSB, CTSD, CTSH, CTSS, CTSZ, LGMN, SGSH, SLC11A1, LAPTM5, LI TAF, NAGPA, CST3, MMP9, PEPD, ACTG1, CSF2RB, TUBA1C, CYGB                                                                                                                                                                                                                                                        |
| 13_Summary | KEGG Pathway            | hsa04145   | Phagosome                                | -6.03257 | -3.56201 | 13/154 | ACTG1, CTSS, CYBA, CYBB, HLA-DRA, ITGB2, MSR1, NCF2, TAP1, ATP6V1F, CLEC7A, TUBA1C, RAB7B                                                                                                                                                                                                                                                                                            |
| 14_Summary | KEGG Pathway            | hsa04380   | Osteoclast differentiation               | -6.02598 | -3.56201 | 12/130 | CSF1, CSF1R, CYBA, CYBB, NCF2, RELB, SPI1, SYK, TYROBP, FOSL1, SOCS3, TREM2, ACTG1, BDKRB2, IFI6, HSPB1, IGFBP6, MMP9, PLAUR, LGMN, ROBO1, VAV1, DOK2, ATP6V1F, ESRP1, FAM20C, RHBDF2, UBASH3B, ACP4, SH                                                                                                                                                                             |
| 15_Summary | GO Biological Processes | GO:0050865 | regulation of cell activation            | -5.88145 | -3.4282  | 27/610 | ADAM8, CAPN3, RUNX1, CD22, CD74, EGR3, FCER1G, HMOX1, IL7R, INPP5D, ITGB2, LGALS3, MIF, PLEK, RPS6KA1, CCL2, SYK, TYROBP, VAV1, CD84, CD83, GPNMB, PRAM1, UBASH3B, CYGB, NFAM1, TIGIT, CR2, LCP1, MFNG, RELB, SLC11A1, SPI1, LAT2, MAFB, SEMA4A, CLEC7A, ADGRG3, IRAK1, NT5E, S100A8, S100A9, FERMT3, CELSR2, CCM2L, ARHGDI1, CSF1, STX3, LPX                                        |
| 16_Summary | GO Biological Processes | GO:0043269 | regulation of ion transport              | -5.62103 | -3.22178 | 28/668 | ATP1B1, CA2, CAPN3, CCR1, CTSS, CYBA, CYBB, GNAO1, KCNQ1, LGALS3, MIF, MMP9, FXYD1, RGS2, RYR2, CCL2, SNCG, SYK, WFS1, CD84, HOMER2, RAMP3, NEDD4L, KCNH3, KCNK13, P2RY12, UBASH3B, CHCHD10, ALAS2, ATP2A3, BDKRB2, CKB, COMT, HMOX1, S100A8, S100A9, SLC11A1, TACR1, NCS1, FAM20A, TRPV5, TTC7A, SLC4A11, HK1, HK3, PIM3, IFI6, ADRB3, CTSZ, ACE, RCAN1, SLC2A5, CRYAB, ENO1, SPHK1 |



|            |                         |            |                                              |          |          |        |                                                                                                                                                                                                                                                             |
|------------|-------------------------|------------|----------------------------------------------|----------|----------|--------|-------------------------------------------------------------------------------------------------------------------------------------------------------------------------------------------------------------------------------------------------------------|
| 17_Summary | GO Biological Processes | GO:0002683 | negative regulation of immune system process | -5.57711 | -3.18449 | 22/450 | A2M, C1QC, RUNX1, CD22, CD74, DDT, FCER1G, HMOX1, IL7R, INPP5D, LGLS3, MIF, CCL2, CD84, LPXN, MAFB, GPNMB, PADI2, UBASH3B, CD200R1, TIGIT, RAB7B, CYGB, RELB, SLC11A1, CD83, HOMER2, TLR8                                                                   |
| 18_Summary | GO Biological Processes | GO:0022617 | extracellular matrix disassembly             | -5.55723 | -3.17758 | 9/76   | A2M, ADAM8, CAPG, CST3, CTSS, KLKB1, LCP1, MMP9, TIMP1, PLK3, PLEK, SREBF2, CCNB2, MFN2, PADI2, MID1IP1, MRPL11, SCIN, CHCHD10, ITGAX, ITGB2, SPP1, SPOCK2                                                                                                  |
| 19_Summary | GO Biological Processes | GO:0007229 | integrin-mediated signaling pathway          | -5.39247 | -3.04954 | 10/101 | FCER1G, ITGAX, ITGB2, PLEK, SYK, TIMP1, TYROBP, VAV1, FERMT3, PRAM1, A2M, ACTG1, RHOC, CAPN3, CC1, EVPL, FOLR1, HMOX1, HSPB1, KLKB1, LCP1, PLAUR, PPL, S100A8, SLC11A1, SPP1, MFN2, PIK3R5, P2RY12, UBA5H3B, CCM2L, CLU, LGALS3BP, TIMP3, CYBA, WFS1, TRPV5 |
| 20_Summary | GO Biological Processes | GO:0019882 | antigen processing and presentation          | -5.38312 | -3.04602 | 13/176 | CD74, CTSD, CTSH, CTSS, ACE, FCER1G, HLA-DRA, LGMN, RELB, SLC11A1, TAP1, IFI30, TREM2, PLK3, IL10RA, IRAK1, ITGAX, ITGB2, SYK, SPHK1, CLEC7A, CTSB                                                                                                          |

Table S5 The functional enrichment results of down-regulated DEGs.

| GroupID   | Category                      | Term       | Description                                    | LogP       | Log(q-value) | InTerm_InList | Symbols                                                                                                                                       |
|-----------|-------------------------------|------------|------------------------------------------------|------------|--------------|---------------|-----------------------------------------------------------------------------------------------------------------------------------------------|
| 1_Summary | GO<br>Biological<br>Processes | GO:0072073 | kidney epithelium<br>development               | -5.6967934 | -1.67515     | 9/139         | EYA1, FGF2, FGFR2, VEGFA, PROM1, SLIT2, ADIPOQ, GREM1, IRX3, ACTA2, PLAG1, MET, ACTG2, COCH, TBX1, TGFB3, TPM1, MMRN2, KIT, CXCR5, CHGA, NGFR |
| 2_Summary | GO<br>Biological<br>Processes | GO:0048705 | skeletal system<br>morphogenesis               | -5.4145828 | -1.67515     | 11/237        | BMPR1B, COCH, EYA1, FGFR2, HOXC8, MGP, MMP16, TBX1, TGFB3, GREM1, PAPP2, COMP, ASPN, FGF2, KIT, PENK, KAZALD1, IGF10, ACTA2                   |
| 2_Member  | GO<br>Biological<br>Processes | GO:0048705 | skeletal system<br>morphogenesis               | -5.4145828 | -1.67515     | 11/237        | BMPR1B, COCH, EYA1, FGFR2, HOXC8, MGP, MMP16, TBX1, TGFB3, GREM1, PAPP2                                                                       |
| 2_Member  | GO<br>Biological<br>Processes | GO:0030282 | bone mineralization                            | -4.5251726 | -1.3544      | 7/109         | BMPR1B, COMP, FGFR2, MGP, TGFB3, GREM1, ASPN                                                                                                  |
| 2_Member  | GO<br>Biological<br>Processes | GO:0031214 | biomineral tissue<br>development               | -4.4082789 | -1.2753      | 8/155         | BMPR1B, COMP, FGFR2, MGP, TBX1, TGFB3, GREM1, ASPN                                                                                            |
| 2_Member  | GO<br>Biological<br>Processes | GO:0001501 | skeletal system development                    | -4.0886672 | -1.17445     | 14/515        | BMPR1B, COMP, COCH, EYA1, FGF2, FGFR2, HOXC8, KIT, MGP, MMP16, TBX1, TGFB3, GREM1, PAPP2                                                      |
| 2_Member  | GO<br>Biological<br>Processes | GO:0070167 | regulation of biomineral<br>tissue development | -4.0685629 | -1.17445     | 6/89          | BMPR1B, COMP, MGP, TGFB3, GREM1, ASPN                                                                                                         |
| 2_Member  | GO<br>Biological<br>Processes | GO:0060349 | bone morphogenesis                             | -3.5627633 | -1.01336     | 6/110         | BMPR1B, COCH, FGFR2, MMP16, TGFB3, PAPP2                                                                                                      |
| 2_Member  | GO<br>Biological<br>Processes | GO:0030500 | regulation of bone<br>mineralization           | -3.5316519 | -1.00996     | 5/72          | BMPR1B, COMP, MGP, TGFB3, GREM1                                                                                                               |

|           |                               |            |                                                |            |          |        |                                                                                                                                                                                                      |
|-----------|-------------------------------|------------|------------------------------------------------|------------|----------|--------|------------------------------------------------------------------------------------------------------------------------------------------------------------------------------------------------------|
| 2_Member  | GO<br>Biological<br>Processes | GO:0001503 | ossification                                   | -3.5240856 | -1.00996 | 11/383 | BMPR1B, COMP, FGFR2, MGP, MMP16, PENK, TGFB3, GREM1, ASPN, KAZALD1, IGSF10                                                                                                                           |
| 2_Member  | GO<br>Biological<br>Processes | GO:0060348 | bone development                               | -3.5092121 | -1.00462 | 8/209  | BMPR1B, COCH, FGFR2, KIT, MMP16, TGFB3, GREM1, PAPP2                                                                                                                                                 |
| 2_Member  | GO<br>Biological<br>Processes | GO:0035988 | chondrocyte proliferation                      | -3.4893368 | -1.00431 | 3/17   | BMPR1B, COMP, MMP16                                                                                                                                                                                  |
| 2_Member  | GO<br>Biological<br>Processes | GO:0030278 | regulation of ossification                     | -2.2992083 | -0.32509 | 6/194  | BMPR1B, COMP, FGFR2, MGP, TGFB3, GREM1                                                                                                                                                               |
| 2_Member  | GO<br>Biological<br>Processes | GO:0061448 | connective tissue<br>development               | -2.212237  | -0.29673 | 7/267  | ACTA2, BMPR1B, COMP, COCH, FGF2, MGP, GREM1                                                                                                                                                          |
| 2_Member  | GO<br>Biological<br>Processes | GO:0051216 | cartilage development                          | -2.165121  | -0.26943 | 6/207  | BMPR1B, COMP, COCH, FGF2, MGP, GREM1                                                                                                                                                                 |
| 2_Member  | GO<br>Biological<br>Processes | GO:0002063 | chondrocyte development                        | -2.1635302 | -0.26943 | 3/48   | BMPR1B, COMP, COCH                                                                                                                                                                                   |
| 3_Summary | GO<br>Biological<br>Processes | GO:0014706 | striated muscle tissue<br>development          | -5.4101893 | -1.67515 | 14/391 | EYAL1, FGF2, FGFR2, MYH11, SGGC, TBX1, TPST1, VEGFA, COPS2, NEBL, NUPR1, GREM1, FHOD3, DIPK2A, CPE, TGFB3, SLIT2, COMP, DES, KRT8, MET, CAP2, RHOBTB3, ANKRD53, STMN4, ESPN, KIT, CHODL, CNN1, SCN3B |
| 4_Summary | GO<br>Biological<br>Processes | GO:0070848 | response to growth factor                      | -5.0687594 | -1.55557 | 19/734 | BMPR1B, COMP, FGF2, FGFR2, GTF2F2, HSPA5, NGFR, PENK, TBX1, TGFB3, VEGFA, HAP1, SLIT2, ACAP2, GREM1, ASPN, FNDC4, MMRN2, SHISA2                                                                      |
| 4_Member  | GO<br>Biological<br>Processes | GO:0070848 | response to growth factor                      | -5.0687594 | -1.55557 | 19/734 | BMPR1B, COMP, FGF2, FGFR2, GTF2F2, HSPA5, NGFR, PENK, TBX1, TGFB3, VEGFA, HAP1, SLIT2, ACAP2, GREM1, ASPN, FNDC4, MMRN2, SHISA2                                                                      |
| 4_Member  | GO<br>Biological<br>Processes | GO:0071363 | cellular response to growth<br>factor stimulus | -4.7640378 | -1.39697 | 18/703 | BMPR1B, COMP, FGF2, FGFR2, GTF2F2, HSPA5, NGFR, PENK, TBX1, TGFB3, VEGFA, HAP1, SLIT2, ACAP2, GREM1, ASPN, MMRN2, SHISA2                                                                             |

|           |                               |            |                                                                          |            |          |        |                                                                                                                                                  |
|-----------|-------------------------------|------------|--------------------------------------------------------------------------|------------|----------|--------|--------------------------------------------------------------------------------------------------------------------------------------------------|
| 4_Member  | GO<br>Biological<br>Processes | GO:0090287 | regulation of cellular<br>response to growth factor<br>stimulus          | -3.9183197 | -1.17445 | 10/287 | FGF2, FGFR2, HSPA5, TGFB3, VEGFA, SLIT2, GREM1, ASPN, MMR<br>N2, SHISA2                                                                          |
| 4_Member  | GO<br>Biological<br>Processes | GO:0090288 | negative regulation of<br>cellular response to growth<br>factor stimulus | -3.4157609 | -0.96703 | 7/164  | HSPA5, TGFB3, SLIT2, GREM1, ASPN, MMR2, SHISA2                                                                                                   |
| 5_Summary | GO<br>Biological<br>Processes | GO:0032787 | monocarboxylic acid<br>metabolic process                                 | -4.5518707 | -1.3544  | 16/594 | ACAA1, ALOX12B, FAAH, HAL, KIT, LDHB, PDK4, PLP1, PRKAR2B<br>, ACSM3, HACD1, ADIPOQ, LPGAT1, PHGDH, OGDHL, AMDHD1, SUC<br>LA2, FGF2, LEPR, PLCH2 |
| 5_Member  | GO<br>Biological<br>Processes | GO:0032787 | monocarboxylic acid<br>metabolic process                                 | -4.5518707 | -1.3544  | 16/594 | ACAA1, ALOX12B, FAAH, HAL, KIT, LDHB, PDK4, PLP1, PRKAR2B<br>, ACSM3, HACD1, ADIPOQ, LPGAT1, PHGDH, OGDHL, AMDHD1                                |
| 5_Member  | GO<br>Biological<br>Processes | GO:0006633 | fatty acid biosynthetic<br>process                                       | -3.5304068 | -1.00996 | 7/157  | ALOX12B, PDK4, PLP1, ACSM3, HACD1, ADIPOQ, LPGAT1                                                                                                |
| 5_Member  | GO<br>Biological<br>Processes | GO:0006631 | fatty acid metabolic<br>process                                          | -3.0488649 | -0.75052 | 10/370 | ACAA1, ALOX12B, FAAH, PDK4, PLP1, PRKAR2B, ACSM3, HACD1,<br>ADIPOQ, LPGAT1                                                                       |
| 5_Member  | GO<br>Biological<br>Processes | GO:0046394 | carboxylic acid<br>biosynthetic process                                  | -2.6793188 | -0.5284  | 10/415 | ALOX12B, PDK4, PLP1, ACSM3, SUCLA2, HACD1, ADIPOQ, LPGAT<br>1, PHGDH, OGDHL                                                                      |
| 5_Member  | GO<br>Biological<br>Processes | GO:0016053 | organic acid biosynthetic<br>process                                     | -2.6717419 | -0.5284  | 10/416 | ALOX12B, PDK4, PLP1, ACSM3, SUCLA2, HACD1, ADIPOQ, LPGAT<br>1, PHGDH, OGDHL                                                                      |
| 5_Member  | GO<br>Biological<br>Processes | GO:0072330 | monocarboxylic acid<br>biosynthetic process                              | -2.5484095 | -0.48854 | 8/295  | ALOX12B, PDK4, PLP1, ACSM3, HACD1, ADIPOQ, LPGAT1, OGDHL                                                                                         |
| 5_Member  | GO<br>Biological<br>Processes | GO:0042304 | regulation of fatty acid<br>biosynthetic process                         | -2.1143239 | -0.24667 | 3/50   | PDK4, ADIPOQ, LPGAT1                                                                                                                             |
| 5_Member  | GO<br>Biological<br>Processes | GO:0044283 | small molecule biosynthetic<br>process                                   | -2.0316749 | -0.19058 | 13/763 | ALOX12B, FGF2, LEPR, PDK4, PLP1, ACSM3, SUCLA2, HACD1, AD<br>IPOQ, PLCH2, LPGAT1, PHGDH, OGDHL                                                   |

|            |                               |            |                                                                        |            |          |        |                                                                                                                                                                                                |
|------------|-------------------------------|------------|------------------------------------------------------------------------|------------|----------|--------|------------------------------------------------------------------------------------------------------------------------------------------------------------------------------------------------|
| 6_Summary  | GO<br>Biological<br>Processes | GO:0031346 | positive regulation of cell<br>projection organization                 | -4.2720789 | -1.17445 | 12/372 | HSPA5, KIT, NGFR, RELN, TGFB3, VEGFA, HAP1, SLIT2, KCTD17, ESPN, CHODL, NEGR1, PLAG1, MMD, GJC2, IRX3, ADIPOQ, CAMK2A, EYA1, SLC6A4, IGSF10                                                    |
| 7_Summary  | KEGG<br>Pathway               | hsa04060   | Cytokine-cytokine receptor<br>interaction                              | -4.1367061 | -1.17445 | 10/270 | CXCR5, BMPR1B, IL2RA, KIT, LEPR, MET, NGFR, TGFB3, VEGFA, IL2ORB                                                                                                                               |
| 8_Summary  | GO<br>Biological<br>Processes | GO:0009636 | response to toxic substance                                            | -4.0532137 | -1.17445 | 14/519 | ACAA1, FGFR2, GSTM3, MET, MT1A, ND6, PENK, SLC6A4, ADIPOQ, ZNF277, NUPR1, GJC2, PPP1R1B, GRIN3A, HSPA5, PRKAR2B, PHGDH                                                                         |
| 9_Summary  | GO<br>Biological<br>Processes | GO:0002551 | mast cell chemotaxis                                                   | -3.9664904 | -1.17445 | 3/12   | CHGA, KIT, VEGFA, TGFB3, COMP, FGFR2, COCH, TPM1, RHOBTB3                                                                                                                                      |
| 10_Summary | GO<br>Biological<br>Processes | GO:0008585 | female gonad development                                               | -3.9111142 | -1.17445 | 6/95   | BMPR1B, HSPA5, KIT, VEGFA, SLIT2, NUPR1, TGFB3, RHOBTB3, NGFR, MAPK10, SLC6A4, ADIPOQ, FGFR2, KRT8, PLAG1, PENK, ASPN, FNDC4                                                                   |
| 11_Summary | GO<br>Biological<br>Processes | GO:0006936 | muscle contraction                                                     | -3.8178483 | -1.14976 | 11/354 | ACTA2, ACTG2, CHGA, CNN1, COMP, DES, KIT, MYH11, SCN7A, TPM1, SCN3B, ACSM3, SGCG, SLC6A4, SLIT2, ADIPOQ                                                                                        |
| 12_Summary | KEGG<br>Pathway               | M00011     | Citrate cycle, second<br>carbon oxidation, 2-<br>oxoglutarate =>       | -3.7529876 | -1.13189 | 3/14   | SUCLG2, SUCLA2, OGDHL, PDK4, ACSM3, HACD1, LDHB, PHGDH, KTL2, ND1, LEPR, ATP8, ND2, ADIPOQ, STEAP4, AK5, HAL, AMDHD1                                                                           |
| 13_Summary | GO<br>Biological<br>Processes | GO:2001028 | positive regulation of<br>endothelial cell chemotaxis                  | -3.6586641 | -1.06242 | 3/15   | FGF2, MET, VEGFA, COL4A5, COMP, FGFR2, IL2RA, KIT, NGFR, RELN, CISH, DGKB, GTF2F2, PDK4, HAP1, ADIPOQ, GREM1, MMRN2, SHISA2, CXCR5, TGFB3, ACAA1, ANKRD53, MAPK10                              |
| 14_Summary | GO<br>Biological<br>Processes | GO:1904706 | negative regulation of<br>vascular smooth muscle cell<br>proliferation | -3.4812993 | -1.00431 | 4/41   | CNN1, TGFB3, TPM1, ADIPOQ, FGF2, FGFR2, SLIT2, DIPK2A, DES, SGCG, BMPR1B, IL2RA, NGFR, SLC6A4, NUDT6, NUPR1, GREM1, IL2ORB                                                                     |
| 15_Summary | GO<br>Biological<br>Processes | GO:0001101 | response to acid chemical                                              | -3.3507991 | -0.93103 | 10/338 | FGFR2, KR18, PDK4, MAPK10, PTGFR, SLC6A4, IBA1, VEGFA, ADIPOQ, RRAGD, MMP16, TGFB3, EYA1, CPE, TPM1, SLIT2, GREM1, ASPN, CRISPLD1, COMP, IRX3, FGF2, GTF2F2, SHISA2, SGCG, COPS2, NUPR1, CHODL |
| 16_Summary | GO<br>Biological<br>Processes | GO:0048871 | multicellular organismal<br>homeostasis                                | -3.2854559 | -0.89284 | 12/476 | ALOX12B, ESRRG, LEPR, MET, PDK4, PRKAR2B, VEGFA, PROM1, ADIPOQ, PLAC8, IL2ORB, IRX3                                                                                                            |

|            |                               |            |                                                                               |            |          |        |                                                                                                 |
|------------|-------------------------------|------------|-------------------------------------------------------------------------------|------------|----------|--------|-------------------------------------------------------------------------------------------------|
| 17_Summary | GO<br>Biological<br>Processes | GO:0032102 | negative regulation of<br>response to external<br>stimulus                    | -3.2718594 | -0.88739 | 10/346 | FGF2, IL2RA, TNFAIP6, SLIT2, ADIPOQ, GREM1, IL20RB, RNF125, FNDC4, GRIN3A                       |
| 18_Summary | GO<br>Biological<br>Processes | GO:0035235 | ionotropic glutamate<br>receptor signaling pathway                            | -2.9807592 | -0.71662 | 3/25   | GRIA3, GRID1, GRIN3A, CAMK2A, PPP1R1B, MAPK10, HCAR1, RELN                                      |
| 19_Summary | GO<br>Biological<br>Processes | GO:0035265 | organ growth                                                                  | -2.9326485 | -0.69106 | 7/198  | COCH, FGF2, FGFR2, LEPR, PLAG1, SLC6A4, DIPK2A, BMPR1B, COMP, VEGFA, SLIT2, PLAC8               |
| 19_Member  | GO<br>Biological<br>Processes | GO:0035265 | organ growth                                                                  | -2.9326485 | -0.69106 | 7/198  | COCH, FGF2, FGFR2, LEPR, PLAG1, SLC6A4, DIPK2A                                                  |
| 19_Member  | GO<br>Biological<br>Processes | GO:0098868 | bone growth                                                                   | -2.2418296 | -0.30151 | 3/45   | COCH, FGFR2, LEPR                                                                               |
| 19_Member  | GO<br>Biological<br>Processes | GO:0048589 | developmental growth                                                          | -2.1453139 | -0.26357 | 12/655 | BMPR1B, COMP, COCH, FGF2, FGFR2, LEPR, PLAG1, SLC6A4, VEGFA, SLIT2, PLAC8, DIPK2A               |
| 20_Summary | GO<br>Biological<br>Processes | GO:0120034 | positive regulation of<br>plasma membrane bounded<br>cell projection assembly | -2.879718  | -0.64528 | 5/100  | KIT, TGFB3, HAP1, KCTD17, ESPN, CDH17, CHGA, MET, TPM1, VEGFA, ANKRD53, SLIT2, COCH, EYA1, TBX1 |

Table S6 The trans-targeting genes prediction of lncRNAs.

| LncRNA_id    | LncRNA position               | Gene_id             | Gene symbol | Location                      | Pearson correlation | adjust-value |
|--------------|-------------------------------|---------------------|-------------|-------------------------------|---------------------|--------------|
| MSTRG. 42621 | X:22068981-22069290           | ENSSSCG00000035520  | -           | X:22068922-22069186           | 0.995617347         | 0.011830751  |
| MSTRG. 6486  | 11:23914858-23927125          | ENSSSCG00000034192  | GNAO1       | 6:29417601-29592698           | 0.997464435         | 0.009773049  |
| MSTRG. 7083  | 12:1562157-1567167            | ENSSSCG00000024045  | CASTOR2     | 3:11956300-12039913           | 0.997587298         | 0.009773049  |
| MSTRG. 7083  | 12:1562157-1567167            | ENSSSCG00000002452  | LGMN        | 7:114175183-114217319         | 0.99782614          | 0.008623517  |
| MSTRG. 7083  | 12:1562157-1567167            | ENSSSCG00000001633  | -           | 7:37281046-37281420           | 0.999921998         | 0.000411091  |
| MSTRG. 7083  | 12:1562157-1567167            | ENSSSCG000000032337 | CDK20       | AEMK02000556. 1:20291-25858   | 0.999370275         | 0.007563287  |
| MSTRG. 7083  | 12:1562157-1567167            | ENSSSCG000000039633 | CRLF2       | AEMK02000569. 1:672382-694311 | 0.999274366         | 0.007563287  |
| MSTRG. 22266 | 2:85486691-85513807           | ENSSSCG00000000135  | KCTD17      | 5:10707354-10718983           | 0.998675101         | 0.007563287  |
| MSTRG. 31613 | 6:48231448-48239613           | ENSSSCG00000012459  | APOOL       | X:68281804-68355006           | -0.998830351        | 0.007563287  |
| MSTRG. 31613 | 6:48231448-48239613           | ENSSSCG00000005467  | HSDL2       | 1:253124403-253191760         | -0.998365052        | 0.007563287  |
| MSTRG. 31613 | 6:48231448-48239613           | ENSSSCG00000017673  | INTS2       | 12:36435812-36494591          | -0.998490461        | 0.007563287  |
| MSTRG. 31613 | 6:48231448-48239613           | ENSSSCG00000024399  | EVC2        | 8:4904743-5023720             | -0.998542742        | 0.007563287  |
| MSTRG. 34932 | 7:24097492-24098545           | ENSSSCG000000034866 | TACC1       | AEMK02000380. 1:8513-65498    | 0.997366215         | 0.009773049  |
| MSTRG. 34932 | 7:24097492-24098545           | ENSSSCG00000000419  | RDH16       | 5:22251753-22293249           | 0.998218497         | 0.007563287  |
| MSTRG. 26349 | 4:17192373-17281592           | ENSSSCG00000014378  | PCDHB4      | 2:142817677-142820079         | 0.999054659         | 0.007563287  |
| MSTRG. 42120 | AEMK02000569. 1:775344-782495 | ENSSSCG000000030209 | MFNG        | 5:10319826-10334504           | 0.998814058         | 0.007563287  |
| MSTRG. 42120 | AEMK02000569. 1:775344-782495 | ENSSSCG000000033262 | CD74        | 2:151399969-151433844         | 0.99746226          | 0.009773049  |
| MSTRG. 42120 | AEMK02000569. 1:775344-782495 | ENSSSCG00000015830  | UNC5D       | 15:50201405-50460534          | 0.997935524         | 0.00838697   |
| MSTRG. 42120 | AEMK02000569. 1:775344-782495 | ENSSSCG00000014347  | PROB1       | 2:141282086-141285145         | 0.998860126         | 0.007563287  |

|              |                                   |                    |         |                                     |             |             |
|--------------|-----------------------------------|--------------------|---------|-------------------------------------|-------------|-------------|
| MSTRG. 42120 | AEMK02000569. 1:7753<br>44-782495 | ENSSSCG00000034036 | CCDC187 | AEMK02000682. 1:1393<br>127-1425625 | 0.998394407 | 0.007563287 |
| MSTRG. 41778 | AEMK02000359. 1:1083<br>4-14297   | ENSSSCG00000015299 | STEAP4  | 9:68544721-68570585                 | 0.99791494  | 0.00838697  |
| MSTRG. 41778 | AEMK02000359. 1:1083<br>4-14297   | ENSSSCG00000034356 | ERVW-1  | 6:10405594-10406889                 | 0.998154143 | 0.00766912  |
| MSTRG. 36786 | 8:383135-384704                   | ENSSSCG00000032380 | Clorf53 | 10:20732726-<br>20738659            | 0.997955335 | 0.00838697  |
| MSTRG. 24516 | 3:41482346-41486942               | ENSSSCG00000006588 | S100A9  | 4:96235327-96239285                 | 0.998238385 | 0.007563287 |
| MSTRG. 24516 | 3:41482346-41486942               | ENSSSCG00000034313 | SELENOW | 6:53472322-53474985                 | 0.997598071 | 0.009773049 |
| MSTRG. 42745 | X:38902375-38908896               | ENSSSCG00000033262 | CD74    | 2:151399969-<br>151433844           | 0.998959813 | 0.007563287 |
| MSTRG. 42745 | X:38902375-38908896               | ENSSSCG00000015830 | UNC5D   | 15:50201405-<br>50460534            | 0.997953664 | 0.00838697  |
| MSTRG. 42745 | X:38902375-38908896               | ENSSSCG00000034036 | CCDC187 | AEMK02000682. 1:1393<br>127-1425625 | 0.998201858 | 0.007563287 |
| MSTRG. 42745 | X:38902375-38908896               | ENSSSCG00000017106 | MED10   | 16:75517023-<br>75524760            | 0.99884127  | 0.007563287 |
| MSTRG. 42745 | X:38902375-38908896               | ENSSSCG00000016577 | ATP6V1F | 18:19753759-<br>19756658            | 0.998197747 | 0.007563287 |
| MSTRG. 49    | 1:824024-825885                   | ENSSSCG00000029281 | PCDHAC2 | 2:142472588-<br>142688089           | 0.997560054 | 0.009773049 |
| MSTRG. 14097 | 14:111470803-<br>111477982        | ENSSSCG00000010554 | SCD     | 14:111461157-<br>111478031          | 0.998610472 | 0.007563287 |
| MSTRG. 14097 | 14:111470803-<br>111477982        | ENSSSCG00000013492 | APBA3   | 2:74929342-74945290                 | 0.998381096 | 0.007563287 |
| MSTRG. 42256 | AEMK02000682. 1:8394<br>54-840881 | ENSSSCG00000034566 | NPDC1   | AEMK02000682. 1:8366<br>24-843893   | 0.99822849  | 0.007563287 |
| MSTRG. 42256 | AEMK02000682. 1:8394<br>54-840881 | ENSSSCG00000022998 | PKIG    | 17:47007780-<br>47044047            | 0.99736946  | 0.009773049 |
| MSTRG. 42256 | AEMK02000682. 1:8394<br>54-840881 | ENSSSCG00000022029 | RAP1GAP | 6:79662137-79735361                 | 0.997864072 | 0.008556559 |
| MSTRG. 42256 | AEMK02000682. 1:8394<br>54-840881 | ENSSSCG00000024736 | ACP4    | 6:55534864-55541862                 | 0.999499407 | 0.007563287 |



|              |                                     |                    |          |                            |              |             |
|--------------|-------------------------------------|--------------------|----------|----------------------------|--------------|-------------|
| MSTRG. 42049 | AEMK02000452. 1:3760<br>564-3768547 | ENSSSCG00000039798 | SLC11A1  | 15:120433736-<br>120447490 | 0.99887915   | 0.007563287 |
| MSTRG. 42049 | AEMK02000452. 1:3760<br>564-3768547 | ENSSSCG00000035032 | -        | 7:7608189-7635391          | 0.997363926  | 0.009773049 |
| MSTRG. 7074  | 12:1190077-1192134                  | ENSSSCG00000013046 | COX8A    | 2:8101611-8103285          | 0.998722893  | 0.007563287 |
| MSTRG. 7074  | 12:1190077-1192134                  | ENSSSCG00000002907 | COX6B1   | 6:45091285-45102669        | 0.998298402  | 0.007563287 |
| MSTRG. 7074  | 12:1190077-1192134                  | ENSSSCG00000023527 | NRROS    | 13:133470645-<br>133496264 | 0.997774157  | 0.008802805 |
| MSTRG. 30986 | 6:13674896-13675970                 | ENSSSCG00000020706 | CBR1     | 13:199600314-<br>199719628 | -0.998288946 | 0.007563287 |
| MSTRG. 1179  | 1:66413113-66467841                 | ENSSSCG00000024399 | EVC2     | 8:4904743-5023720          | 0.998423454  | 0.007563287 |
| MSTRG. 18342 | 17:27099733-<br>27123696            | ENSSSCG00000013046 | COX8A    | 2:8101611-8103285          | 0.997979084  | 0.00838697  |
| MSTRG. 18342 | 17:27099733-<br>27123696            | ENSSSCG00000002907 | COX6B1   | 6:45091285-45102669        | 0.997489711  | 0.009773049 |
| MSTRG. 18342 | 17:27099733-<br>27123696            | ENSSSCG00000034058 | ARHGDI A | 12:1093195-1121126         | 0.998833901  | 0.007563287 |
| MSTRG. 18342 | 17:27099733-<br>27123696            | ENSSSCG00000023527 | NRROS    | 13:133470645-<br>133496264 | 0.998742862  | 0.007563287 |
| MSTRG. 25441 | 3:94069841-94073841                 | ENSSSCG00000013556 | ADGRE1   | 2:72217039-72306013        | 0.997416341  | 0.009773049 |

Table S7 Functional enrichment analysis of the trans-targeting genes of lncRNAs.

| GroupID   | Category                | Term       | Description                                               | LogP     | Log(q-value) | InTerm_InList | Symbols                                                   |
|-----------|-------------------------|------------|-----------------------------------------------------------|----------|--------------|---------------|-----------------------------------------------------------|
| 1_Summary | GO Biological Processes | GO:0006636 | unsaturated fatty acid biosynthetic process               | -4.19381 | 0            | 3/48          | CBR1, CD74, SCD                                           |
| 2_Summary | GO Biological Processes | GO:0006826 | iron ion transport                                        | -3.86082 | 0            | 3/62          | SLC11A1, ATP6V1F, STEAP4, S100A9, COX6B1, COX8A           |
| 3_Summary | GO Biological Processes | GO:0022900 | electron transport chain                                  | -3.69881 | 0            | 4/180         | COX6B1, COX8A, RDH16, STEAP4, ATP6V1F                     |
| 4_Summary | GO Biological Processes | GO:0048002 | antigen processing and presentation of peptide antigen    | -2.8254  | 0            | 3/140         | CD74, LGMN, SLC11A1, RAP1GAP, S100A9, UNC5D, CRLF2, NRROS |
| 5_Summary | GO Biological Processes | GO:0031345 | negative regulation of cell projection organization       | -2.51518 | 0            | 3/180         | ARHGDIA, RAP1GAP, ACP4, S100A9, KCTD17, GNAO1, LGMN       |
| 6_Summary | GO Biological Processes | GO:0098742 | cell-cell adhesion via plasma-membrane adhesion molecules | -2.0019  | 0            | 3/276         | PCDHB4, PCDHAC2, UNC5D                                    |















2.38

1.4

3.64

#NUM!

0.3
